# Supplementary material for: Substrate-controlled Rh(iii)-catalyzed regiodivergent annulation towards fused and spiro benzimidazoles
Source: Royal Society of Chemistry journal article supplement (doi:10.1039/d2ob00906d), 2022-01-01
Supplement: d2ob00906d1.pdf [file d2ob00906d1.pdf]

## Supporting Information

### Substrate-Controlled Rh(III)-catalyzed Regiodivergent Annulation to Fused and Spiro Benzimidazoles

Ying-Ti Huang,<sup>a</sup> Indrajeet J. Barve,<sup>a</sup> Yi-Ting Huang,<sup>a</sup> Sandip Dhole,<sup>c</sup> Wei-Jung Chiu<sup>a</sup> and Chung-Ming Sun<sup>a,b\*</sup>

<sup>a</sup>*Department of Applied Chemistry, National Chiao-Tung University, 1001 Ta-Hsueh Road, Hsinchu 300-10, Taiwan, ROC*

<sup>b</sup>*Department of Medicinal and Applied Chemistry, Kaohsiung Medical University, 100, Shih-Chuan 1<sup>st</sup> Road, Kaohsiung 807-08, Taiwan, ROC*

<sup>c</sup>*Amar Chemistry Pvt. Ltd., G1A, Ackruti Corporate Park, Mumbai 400078, India*

E-mail: cmsun@nctu.edu.tw

### Table of Contents

|                                                                                             |           |
|---------------------------------------------------------------------------------------------|-----------|
| General Methods                                                                             | S2        |
| A representative procedure for the synthesis of <b>3a</b> and <b>5aa</b>                    | S3-S4     |
| Characterization data of compounds <b>3a-3zb</b> , <b>5aa-5az</b> , <b>4a</b> and <b>6a</b> | S5-S33    |
| KIE study                                                                                   | S34-S35   |
| Spectral data of compounds <b>3a-3zc</b> , <b>5aa-5bd</b> , <b>4a</b> and <b>6a</b>         | S36-S317  |
| X-ray crystallographic data of compound <b>3a</b>                                           | S318-S324 |
| X-ray crystallographic data of compound <b>5aa</b>                                          | S325-S331 |

## General Methods

$^1\text{H}$  NMR (400 MHz and 600 Hz) and  $^{13}\text{C}$  NMR (101 MHz and 151 Hz) spectra were recorded on 400 and 600 MHz automated spectrometers. Chemical shifts are reported in parts per million (ppm) on the  $\delta$  scale from an internal standard (TMS). Analytical thin-layer chromatography (TLC) was performed using 0.25 mm silica gel-coated Kieselgel 60 F<sub>254</sub> plates. Flash chromatography was performed using the indicated solvent and silica gel 60 (Merck, 230-400 mesh). Melting points were recorded on a Fargo melting point apparatus and are uncorrected. High-resolution mass spectra (HRMS) were recorded in ESI mode using TOF mass spectrometer. IR spectra were recorded using a Bruker spectrophotometer. *N*-aryl benzimidazoles **1** and maleimides **2** were prepared according to the reported procedures.<sup>1,2</sup> All materials were purchased from commercial sources and used without further purification.

### A representative procedure for the synthesis of **3a**

To an oven-dried sealed tube was added 2-phenyl benzimidazole **1a** (0.1 g, 0.515 mmol), *N*-methylmaleimide **2a** (0.11 g, 1.03 mmol), [RhCp\*Cl<sub>2</sub>]<sub>2</sub> (0.0079 g, 0.012 mmol), AgOAc (0.27 g, 1.03 mmol) and 1,2-dichloroethane (3 mL). The reaction mixture was heated at 100 °C for 5 h. The reaction mixture was cooled down at room temperature and filtered through celite bed. The filtrate was concentrated under reduced pressure. The crude reaction mixture was purified by column chromatography (20% ethyl acetate/*n*-hexanes) to obtain 2-methyl-3*a*,13*a*-dihydro-1*H*-benzo[4,5]imidazo[2,1-*a*]pyrrolo[3,4-*c*]isoquinoline-1,3(2*H*)-dione **3a**.

Pale yellow solid, 0.212 g, 90%; mp 239-241 °C; <sup>1</sup>H NMR (400 MHz, CDCl<sub>3</sub>): δ 8.42 (d, *J* = 8.7 Hz, 1H), 7.92 (d, *J* = 8.1 Hz, 1H), 7.79 (dd, *J* = 19.6, 7.6 Hz, 2H), 7.50 (d, *J* = 4.0 Hz, 2H), 7.35 (s, 2H), 5.65 (d, *J* = 9.7 Hz, 1H), 4.68 (d, *J* = 9.7 Hz, 1H), 3.07 (s, 3H); <sup>13</sup>C NMR (101 MHz, CDCl<sub>3</sub>): δ 172.3, 145.5, 143.8, 134.9, 130.9, 129.2, 128.2, 126.2, 125.8, 124.4, 123.7, 123.5, 119.8, 111.1, 53.1, 41.6, 25.6; HRMS (ESI, *m/z*) calculated for C<sub>18</sub>H<sub>14</sub>N<sub>3</sub>O<sub>2</sub> (M + H)<sup>+</sup> 304.1086, found 304.1084.

### A representative procedure for the synthesis of **5aa**

To an oven-dried sealed tube was added 2-(*o*-tolyl)-benzimidazole **1h** (0.1 g, 0.481 mmol), *N*-methylmaleimide **2a** (0.1 g, 0.962 mmol), [RhCp\*Cl<sub>2</sub>]<sub>2</sub> (0.0074 g, 0.012 mmol), AgOAc (0.15 g, 0.962 mmol), AcOH (0.14 g, 2.405 mmol) and acetonitrile (3 mL). The reaction mixture was heated at 100 °C for 5 h. The reaction mixture was cooled down at room temperature and filtered through celite bed. The filtrate was concentrated under reduced pressure. The crude reaction mixture was purified by column chromatography (25% ethyl

acetate/n-hexanes) to obtain 1',4-dimethylspiro [benzo [4,5] imidazo [2,1-a] isoindole-11,3'-pyrrolidine]-2',5'-dione **5aa**.

Pale yellow solid, 0.194 g, 65%; mp 261-263 °C; <sup>1</sup>H NMR (400 MHz, acetone-*d*<sub>6</sub>): δ 7.86 – 7.70 (m, 1H), 7.55 (d, J = 6.4 Hz, 1H), 7.52 – 7.39 (m, 3H), 7.38 – 7.19 (m, 2H), 3.75 (d, J = 18.5 Hz, 1H), 3.54 (d, J = 18.5 Hz, 1H), 3.18 (s, 3H); <sup>13</sup>C NMR (100 MHz, acetone-*d*<sub>6</sub>): δ 173.9, 173.6, 159.0, 150.0, 148.4, 135.7, 132.3, 131.5, 131.3, 127.9, 124.0, 123.2, 121.5, 120.5, 110.2, 67.5, 39.6, 26.0, 18.4; HRMS (ESI, m/z) calculated for C<sub>19</sub>H<sub>16</sub>N<sub>3</sub>O<sub>2</sub> (M + H)<sup>+</sup> 318.1243, found 318.1241.

## References

1. Y. S. Lee, Y. H. Cho., S. Lee, J. K. Bin, J. H. Yang, G. Chae, C. H. Cheon *Tetrahedron*, **2015**, *71*, 532-538.
2. R. Mandal, B. Emayavaramban, B. Sundararaju *Org. Lett.* **2018**, *20*, 2815-2838.

## Characterization data

### 2-methyl-3a,13a-dihydro-1H-benzo[4,5]imidazo[2,1-a]pyrrolo[3,4-c]isoquinoline-1,3(2H)-dione (3a)

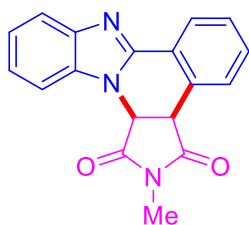

Pale yellow solid, 0.212 g, 90%; mp 239-241 °C;  $^1\text{H}$  NMR (400 MHz,  $\text{CDCl}_3$ ):  $\delta$  8.42 (d,  $J = 8.7$  Hz, 1H), 7.92 (d,  $J = 8.1$  Hz, 1H), 7.79 (dd,  $J = 19.6, 7.6$  Hz, 2H), 7.50 (d,  $J = 4.0$  Hz, 2H), 7.35 (s, 2H), 5.65 (d,  $J = 9.7$  Hz, 1H), 4.68 (d,  $J = 9.7$  Hz, 1H), 3.07 (s, 3H);  $^{13}\text{C}$  NMR (101 MHz,  $\text{CDCl}_3$ ):  $\delta$  172.3, 145.5, 143.8, 134.9, 130.9, 129.2, 128.2, 126.2, 125.8, 124.4, 123.7, 123.5, 119.8, 111.1, 53.1, 41.6, 25.6; HRMS (ESI,  $m/z$ ) calculated for  $\text{C}_{18}\text{H}_{14}\text{N}_3\text{O}_2$  ( $\text{M} + \text{H}$ ) $^+$  304.1086, found 304.1084.

### 2,5-dimethyl-3a,13a-dihydro-1H-benzo[4,5]imidazo[2,1-a]pyrrolo[3,4-c]isoquinoline-1,3(2H)-dione (3b)

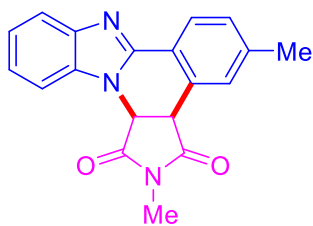

Pale yellow solid, 0.214 g, 87%; mp 237-239 °C;  $^1\text{H}$  NMR (600 MHz,  $\text{CDCl}_3$ ):  $\delta$  8.30 (d,  $J = 8.0$  Hz, 1H), 7.73 (dd,  $J = 7.9, 3.3$  Hz, 2H), 7.71 (s, 1H), 7.34 (t,  $J = 7.5$  Hz, 1H), 7.29 (t,  $J = 7.7$  Hz, 1H), 7.26 (s, 1H), 5.75 (d,  $J = 9.1$  Hz, 1H), 4.72 (d,  $J = 9.1$  Hz, 1H), 3.05 (s, 3H), 2.43 (s, 3H);  $^{13}\text{C}$  NMR (150 MHz,  $\text{CDCl}_3$ ):  $\delta$  173.9, 172.2, 145.2, 142.3, 134.2, 130.3, 128.6, 126.4, 126.2, 124.0, 118.70, 111.4, 53.3, 41.6, 25.7, 21.8; HRMS (ESI,  $m/z$ ) calculated for  $\text{C}_{19}\text{H}_{16}\text{N}_3\text{O}_2$  ( $\text{M} + \text{H}$ ) $^+$  318.1243, found 318.1235.

### 2-methyl-5-(trifluoromethyl)-3a,13a-dihydro-1H-benzo[4,5]imidazo[2,1-a]pyrrolo[3,4-c]isoquinoline-1,3(2H)-dione (3c)

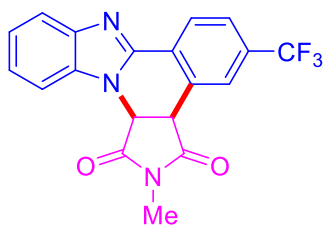

Pale yellow solid, 0.160 g, 75%; mp 265-267 °C;  $^1\text{H}$  NMR (400 MHz,  $\text{acetone-}d_6$ ):  $\delta$  8.60 (d,  $J = 8.2$  Hz, 1H), 8.28 (s, 1H), 7.97 (d,  $J = 7.6$  Hz, 1H), 7.84 (d,  $J = 8.2$  Hz, 1H), 7.74 (d,  $J = 7.7$  Hz, 1H), 7.37 (dt,  $J = 19.5, 7.2$  Hz, 2H), 6.19 (d,  $J = 9.9$  Hz, 1H), 5.12 (d,  $J = 9.9$  Hz, 1H), 3.00 (s, 3H);  $^{13}\text{C}$  NMR (100 MHz,  $\text{acetone-}d_6$ ):  $\delta$  174.2, 172.8, 144.2, 135.2, 129.2, 126.6 (q,  $J = 233$  Hz), 126.2, 125.7 (q,  $J = 4.1$  Hz), 125.4, 125.1 (q,  $J = 3.7$  Hz), 123.8, 123.5, 119.1, 112.7, 53.3, 41.4, 24.9; HRMS (ESI,  $m/z$ ) calculated for  $\text{C}_{19}\text{H}_{13}\text{F}_3\text{N}_3\text{O}_2$  ( $\text{M} + \text{H}$ ) $^+$  372.0960, found 372.0957.

**5-bromo-2-methyl-3a,13a-dihydro-1H-benzo[4,5]imidazo[2,1-a]pyrrolo[3,4-c]isoquinoline-1,3(2H)-dione (3d)**

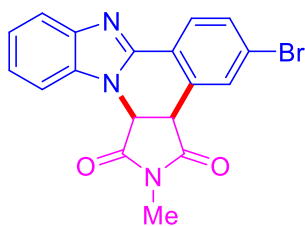

Orange solid, 0.168 g, 80%; mp 190-192 °C; <sup>1</sup>H NMR (400 MHz, DMSO-*d*<sub>6</sub>) δ 8.18 (dd, *J* = 8.4, 3.5 Hz, 1H), 8.01 (s, 1H), 7.86 (d, *J* = 8.0 Hz, 1H), 7.72 (t, *J* = 8.1 Hz, 2H), 7.35 (dt, *J* = 22.6, 7.7 Hz, 2H), 6.08 (d, *J* = 9.8 Hz, 1H), 4.93 (d, *J* = 9.9 Hz, 1H), 2.88 (s, 3H); <sup>13</sup>C NMR (100 MHz, DMSO-*d*<sub>6</sub>): δ 174.9, 173.5, 145.1, 135.0, 132.0, 131.5, 130.9, 127.4, 124.5, 123.9, 123.3, 118.9, 113.1, 53.3, 41.3, 25.8; HRMS (ESI, *m/z*) calculated for C<sub>18</sub>H<sub>13</sub>BrN<sub>3</sub>O<sub>2</sub> (M + H)<sup>+</sup> 382.0191, found 382.0186.

**2,6-dimethyl-3a,13a-dihydro-1H-benzo[4,5]imidazo[2,1-a]pyrrolo[3,4-c]isoquinoline-1,3(2H)-dione (3e)**

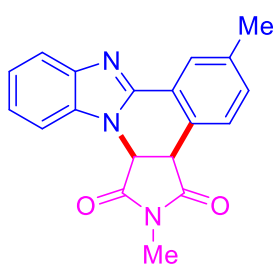

Yellow solid, 0.190 g, 83%; mp 210-212 °C; <sup>1</sup>H NMR (400 MHz, CDCl<sub>3</sub>) δ 8.23 (s, 1H), 7.77 (d, *J* = 7.7 Hz, 2H), 7.70 (d, *J* = 7.6 Hz, 1H), 7.41 – 7.28 (m, 3H), 5.59 (d, *J* = 9.6 Hz, 1H), 4.62 (d, *J* = 9.6 Hz, 1H), 3.04 (s, 3H), 2.41 (s, 3H); <sup>13</sup>C NMR (100 MHz, CDCl<sub>3</sub>): δ 174.2, 172.4, 145.7, 139.4, 134.8, 132.0, 128.1, 126.2, 123.9, 123.7, 123.6, 123.3, 119.6, 111.1, 53.2, 41.4, 25.6, 21.0; HRMS (ESI, *m/z*) calculated for C<sub>19</sub>H<sub>16</sub>N<sub>3</sub>O<sub>2</sub> (M + H)<sup>+</sup> 318.1243, found 318.1242.

**6-methoxy-2-methyl-3a,13a-dihydro-1H-benzo[4,5]imidazo[2,1-a]pyrrolo[3,4-c]isoquinoline-1,3(2H)-dione (3f)**

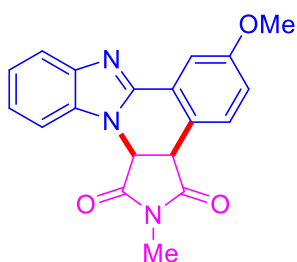

Yellow solid, 0.168 g, 81%; mp 234-236 °C; <sup>1</sup>H NMR (400 MHz, CDCl<sub>3</sub>): δ 7.96 (s, 1H), 7.83 (d, *J* = 8.7 Hz, 2H), 7.65 (d, *J* = 8.6 Hz, 1H), 7.40 (t, *J* = 7.6 Hz, 1H), 7.29 (d, *J* = 6.8 Hz, 1H), 7.07 (d, *J* = 8.6 Hz, 1H), 5.99 (d, *J* = 6.5 Hz, 1H), 4.88 (d, *J* = 6.5 Hz, 1H), 3.88 (s, 3H), 3.06 (s, 3H); <sup>13</sup>C NMR (100 MHz, CDCl<sub>3</sub>): δ 174.4, 172.4, 160.2, 145.6, 143.7, 135.0, 129.5, 125.5, 123.8, 123.5, 119.8, 119.0, 118.3, 111.1, 108.5, 55.8, 53.2, 41.2, 25.6; HRMS (ESI, *m/z*) calculated for C<sub>19</sub>H<sub>16</sub>N<sub>3</sub>O<sub>3</sub> (M + H)<sup>+</sup> 334.1192, found 334.1183.

**7-phenyl-5a,8a-dihydro-6H-benzo[*g*]benzo[4,5]imidazo[2,1-*a*]pyrrolo[3,4-*c*]isoquinoline-6,8(7*H*)-dione (3g)**

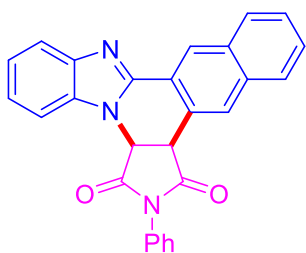

Yellow solid, 0.200 g, 80%; mp 205-207 °C; <sup>1</sup>H NMR (600 MHz, DMSO-*d*<sub>6</sub>): δ 9.18 (s, 1H), 8.49 (s, 2H), 8.13 – 8.07 (m, 1H), 8.04 – 8.00 (m, 1H), 7.95 (d, *J* = 7.3 Hz, 1H), 7.78 (d, *J* = 8.2 Hz, 1H), 7.67 – 7.60 (m, 2H), 7.46 (t, *J* = 7.4 Hz, 2H), 7.40 (dd, *J* = 18.3, 7.2 Hz, 2H), 7.36 (d, *J* = 8.5 Hz, 2H), 6.47 (d, *J* = 9.8 Hz, 1H), 5.34 (d, *J* = 9.3 Hz, 1H); <sup>13</sup>C NMR (150 MHz, DMSO-*d*<sub>6</sub>): δ 173.6, 171.9, 145.7, 134.4, 132.8, 132.2, 128.8, 128.7, 128.6, 128.1, 127.9, 127.4, 126.8, 124.6, 123.8, 123.5, 112.4, 53.8, 41.7, 29.4; HRMS (ESI, *m/z*) calculated for C<sub>27</sub>H<sub>18</sub>N<sub>3</sub>O<sub>2</sub> (M + H)<sup>+</sup> 416.1399, found 416.1395.

**2,9-dimethyl-3a,13a-dihydro-1H-benzo[4,5]imidazo[2,1-*a*]pyrrolo[3,4-*c*]isoquinoline-1,3(2*H*)-dione (3h)**

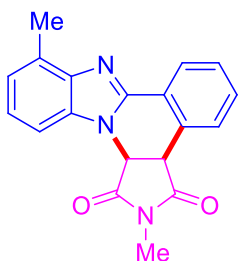

Yellow solid, 0.201 g, 88%; mp 232-234 °C; <sup>1</sup>H NMR (600 MHz, CDCl<sub>3</sub>): δ 8.49 (s, 1H), 7.88 (dd, *J* = 5.2, 3.8 Hz, 1H), 7.54 (d, *J* = 8.1 Hz, 1H), 7.47 (dd, *J* = 5.8, 3.4 Hz, 2H), 7.23 (d, *J* = 7.8 Hz, 1H), 7.11 (d, *J* = 7.3 Hz, 1H), 5.60 (d, *J* = 9.7 Hz, 1H), 4.65 (d, *J* = 9.6 Hz, 1H), 3.04 (s, 3H), 2.70 (s, 3H); <sup>13</sup>C NMR (150 MHz, CDCl<sub>3</sub>): δ 174.1, 172.4, 144.7, 134.6, 130.6, 130.0, 129.1, 128.1, 126.1, 126.0, 123.8, 123.6, 108.4, 53.2, 41.6, 25.6, 16.7; HRMS (ESI, *m/z*) calculated for C<sub>19</sub>H<sub>16</sub>N<sub>3</sub>O<sub>2</sub> (M + H)<sup>+</sup> 318.1243, found 318.1249.

**2,10,11-trimethyl-3a,13a-dihydro-1H-benzo[4,5]imidazo[2,1-*a*]pyrrolo[3,4-*c*]isoquinoline-1,3(2*H*)-dione (3i)**

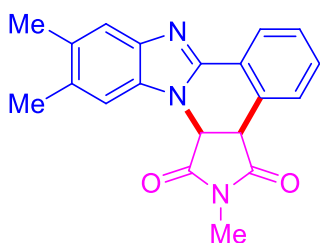

Yellow solid, 0.190 g, 85%; mp 215-217 °C; <sup>1</sup>H NMR (400 MHz, CDCl<sub>3</sub>): δ 8.43 – 8.32 (m, 1H), 7.94 – 7.83 (m, 1H), 7.56 (s, 1H), 7.51 – 7.45 (m, 3H), 5.57 (d, *J* = 9.7 Hz, 1H), 4.63 (d, *J* = 9.7 Hz, 1H), 3.06 (s, 3H), 2.42 (s, 3H), 2.39 (s, 3H); <sup>13</sup>C NMR (100 MHz, CDCl<sub>3</sub>): δ 174.2, 172.5, 144.6, 142.3, 133.3, 133.1, 132.6, 130.4, 129.1, 128.1, 125.9, 125.6, 119.7, 111.1, 53.1, 41.6, 28.2, 25.6, 20.7, 20.4; HRMS (ESI, *m/z*) calculated for C<sub>20</sub>H<sub>18</sub>N<sub>3</sub>O<sub>2</sub> (M + H)<sup>+</sup> 332.1399, found 332.1399.

**2,10-dimethyl-3a,13a-dihydro-1H-benzo[4,5]imidazo[2,1-a]pyrrolo[3,4-c]isoquinoline-1,3(2H)-dione & 2,11-dimethyl-3a,13a-dihydro-1H-benzo [4,5] imidazo[2,1-a] pyrrolo[3,4-c]isoquinoline-1,3(2H)-dione (3j & 3j')**

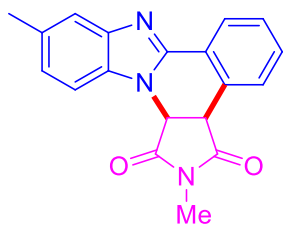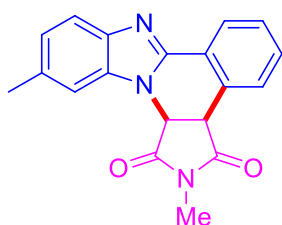

Inseparable mixture; Pale yellow solid, 0.190 g, 83%; mp 232-234 °C; <sup>1</sup>H NMR (600 MHz, CDCl<sub>3</sub>) δ 8.41, 8.40, 8.40, 8.39, 8.39, 8.38, 8.38, 7.92, 7.91, 7.91, 7.90, 7.90, 7.69, 7.68, 7.63, 7.62, 7.59,

7.52, 7.50, 7.49, 7.49, 7.49, 7.48, 7.19, 7.17, 7.16, 5.59, 5.58, 5.57, 5.56, 4.66, 4.65, 4.64, 4.64, 3.07, 3.06, 2.54, 2.51; <sup>13</sup>C NMR (100 MHz, CDCl<sub>3</sub>): δ 174.1, 172.5, 172.4, 145.4, 145.1, 144.2, 142.0, 135.1, 133.9, 133.3, 133.0, 130.7, 130.6, 129.2, 128.2, 128.1, 126.0, 126.0, 125.8, 125.7, 125.3, 125.2, 124.6, 124.5, 119.6, 119.3, 110.8, 110.6, 53.1, 53.1, 41.60, 25.6, 22.0, 21.6; HRMS (ESI, *m/z*) calculated for C<sub>19</sub>H<sub>16</sub>N<sub>3</sub>O<sub>2</sub> (M + H)<sup>+</sup> 318.1243, found 318.1248.

**10-benzoyl-2-methyl-3a,13a-dihydro-1H-benzo[4,5]imidazo[2,1-a]pyrrolo[3,4-c]isoquinoline-1,3(2H)-dione & 11-benzoyl-2-methyl-3a,13a-dihydro-1H-benzo [4,5]imidazo [2,1-a]pyrrolo[3,4-c]isoquinoline-1,3(2H)-dione (3k & 3k')**

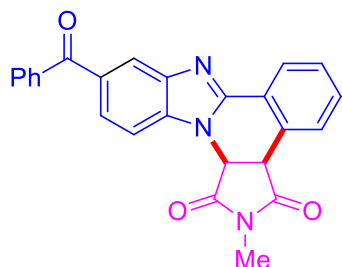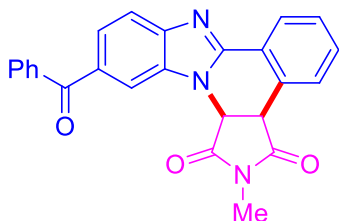

Inseparable mixture; Yellow solid, 0.154 g, 75%; mp 226-228 °C; <sup>1</sup>H NMR (400 MHz, CDCl<sub>3</sub>) δ 8.43, 8.41, 8.40, 8.38, 8.26, 8.20, 7.95, 7.94, 7.91, 7.86, 7.84, 7.82, 7.61, 7.59, 7.57, 7.55, 7.53, 7.51, 7.48,

7.47, 5.72, 5.69, 4.74, 4.71, 3.08, 3.05.; <sup>13</sup>C NMR (100 MHz, CDCl<sub>3</sub>): δ 196.5, 196.3, 173.8, 172.1, 148.3, 147.3, 147.1, 143.2, 138.1, 137.9, 134.7, 133.2, 132.8, 132.2, 131.6, 131.4, 130.1, 130.1, 129.4, 128.4, 128.3, 126.6, 126.3, 126.1, 126.1, 125.8, 123.9, 123.9, 123.2, 119.3, 114.1, 111.2, 53.1, 41.5, 29.7, 25.8; HRMS (ESI, *m/z*) calculated for C<sub>25</sub>H<sub>18</sub>N<sub>3</sub>O<sub>3</sub> (M + H)<sup>+</sup> 408.1348, found 408.1351.



**5-methyl-3b,6a-dihydro-4H-benzo[4,5]imidazo[1,2-a]furo[2,3-c]pyrrolo[3,4-e]pyridine-4,6(5H)-dione (3m)**

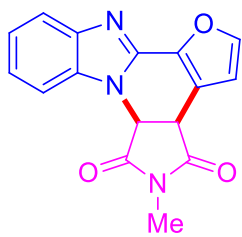

Yellow solid, 0.175 g, 73%; mp 237-239 °C; <sup>1</sup>H NMR (400 MHz, CDCl<sub>3</sub>): δ 7.77 (d, *J* = 7.8 Hz, 1H), 7.62 (s, 1H), 7.60 (s, 1H), 7.32 (p, *J* = 7.2 Hz, 2H), 6.78 (s, 1H), 5.60 (d, *J* = 9.8 Hz, 1H), 4.64 (d, *J* = 9.8 Hz, 1H), 3.06 (s, 3H); <sup>13</sup>C NMR (101 MHz, CDCl<sub>3</sub>) δ 173.3, 172.3, 146.0, 143.6, 140.7, 139.4, 134.4, 124.1, 123.3, 120.2, 116.8, 110.6, 53.8, 39.8,

29.7, 25.7.; HRMS (ESI, *m/z*) calculated for C<sub>16</sub>H<sub>12</sub>N<sub>3</sub>O<sub>3</sub> (M + H)<sup>+</sup> 294.0879, found 294.0875.

**5-methyl-3b,6a-dihydro-4H-benzo[4,5]imidazo[1,2-a]pyrrolo[3,4-e]thieno[2,3-c]pyridine-4,6(5H)-dione (3n)**

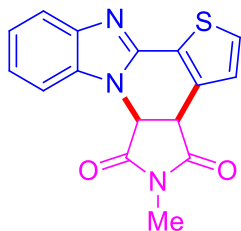

Yellow solid, 0.181 g, 78%; mp 242-244 °C; <sup>1</sup>H NMR (600 MHz, Acetone-*d*<sub>6</sub>): δ 7.77 (d, *J* = 8.1 Hz, 1H), 7.74 (d, *J* = 5.1 Hz, 1H), 7.62 (d, *J* = 7.9 Hz, 1H), 7.41 (d, *J* = 5.1 Hz, 1H), 7.30 (t, *J* = 8.1 Hz, 1H), 7.25 (t, *J* = 7.6 Hz, 1H), 6.11 (d, *J* = 9.8 Hz, 1H), 4.94 (d, *J* = 9.8 Hz, 1H), 2.98 (s, 3H); <sup>13</sup>C NMR (150 MHz, Acetone-*d*<sub>6</sub>): δ 173.9, 173.3,

144.0, 143.3, 135.0, 132.2, 129.0, 127.2, 123.0, 122.5, 119.1, 111.5, 54.0, 41.8, 24.7; HRMS (ESI, *m/z*) calculated for C<sub>16</sub>H<sub>12</sub>N<sub>3</sub>O<sub>2</sub>S (M + H)<sup>+</sup> 310.0650, found 310.0646.

**1-methyl-5-phenyl-3b,6a-dihydrobenzo[4,5]imidazo[1,2-a]dipyrrolo[2,3-c:3',4'-e]pyridine-4,6(1H,5H)-dione (3o)**

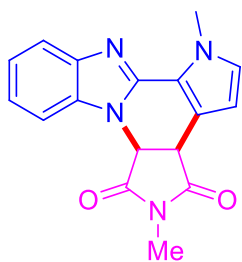

Pale yellow solid, 0.181 g, 82%; mp 242-244 °C; <sup>1</sup>H NMR (400 MHz, CDCl<sub>3</sub>): δ 7.80 (d, *J* = 8.0 Hz, 1H), 7.62 (d, *J* = 8.1 Hz, 1H), 7.45 (t, *J* = 7.5 Hz, 2H), 7.40 (d, *J* = 7.2 Hz, 1H), 7.36 – 7.26 (m, 5H), 7.24 (d, *J* = 7.4 Hz, 1H), 6.85 (d, *J* = 2.6 Hz, 1H), 6.47 (d, *J* = 2.6 Hz, 1H), 4.15 (s, 3H); <sup>13</sup>C NMR (150 MHz, CDCl<sub>3</sub>): δ 171.7, 170.9, 135.5, 131.0, 130.6,

129.7, 129.4, 126.0, 125.7, 121.8, 114.3, 112.9, 112.1, 108.3, 55.1, 40.3, 34.6, 29.7; HRMS (ESI, *m/z*) calculated for C<sub>22</sub>H<sub>17</sub>N<sub>4</sub>O<sub>2</sub> (M + H)<sup>+</sup> 369.1352, found 369.1350.

**2,6-dimethyl-4a,7a-dihydro-5H-imidazo[2,1-a]pyrrolo[3,4-c]isoquinoline-5,7(6H)-dione (3p)**

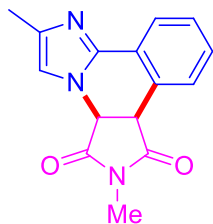

Pale yellow solid, 0.209 g, 82%; mp 231-233 °C; <sup>1</sup>H NMR (400 MHz, CDCl<sub>3</sub>): δ 8.10 (d, *J* = 7.2 Hz, 1H), 7.71 (d, *J* = 7.6 Hz, 1H), 7.46 – 7.28 (m, 2H), 7.08 (s, 1H), 5.22 (d, *J* = 9.6 Hz, 1H), 4.47 (d, *J* = 9.6 Hz, 1H), 3.05 (s, 3H), 2.29 (s, 3H); <sup>13</sup>C NMR (100 MHz, CDCl<sub>3</sub>): δ 174.3, 172.6, 140.4, 140.0, 129.1, 129.0, 128.9, 124.6, 123.8, 123.6, 115.7, 53.8, 41.9,

25.8, 13.8; HRMS (ESI, *m/z*) calculated for C<sub>15</sub>H<sub>14</sub>N<sub>3</sub>O<sub>2</sub> (M + H)<sup>+</sup> 268.1086, found 268.1081.

**6-methyl-4a,7a-dihydro-5H-imidazo[2,1-a]pyrrolo[3,4-c]isoquinoline-5,7(6H)-dione (3q)**

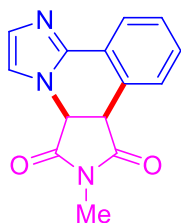

Orange solid, 0.221 g, 84%; mp 238-240 °C; <sup>1</sup>H NMR (400 MHz, CDCl<sub>3</sub>): δ 8.15 (d, *J* = 7.1 Hz, 1H), 7.75 (d, *J* = 8.0 Hz, 1H), 7.51 – 7.34 (m, 3H), 7.23 (s, 1H), 5.30 (d, *J* = 9.7 Hz, 1H), 4.52 (d, *J* = 9.6 Hz, 1H), 3.07 (s, 3H); <sup>13</sup>C NMR (100 MHz, CDCl<sub>3</sub>): δ 174.2, 172.4, 141.2, 130.6, 129.2, 128.9, 124.6, 123.9, 119.2, 54.0, 41.9, 25.8; HRMS (ESI, *m/z*) calculated for C<sub>14</sub>H<sub>12</sub>N<sub>3</sub>O<sub>2</sub>

(M + H)<sup>+</sup> 254.0930, found 254.0922.

**6-propyl-4a,7a-dihydro-5H-imidazo[2,1-a]pyrrolo[3,4-c]isoquinoline-5,7(6H)-dione (3r)**

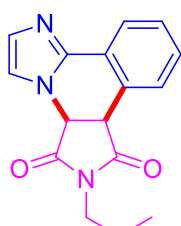

Off-white solid, 0.201 g, 90%; mp 140-142 °C; <sup>1</sup>H NMR (600 MHz, CDCl<sub>3</sub>): δ 8.15 (d, *J* = 7.5 Hz, 1H), 7.73 (d, *J* = 7.6 Hz, 1H), 7.42 (dt, *J* = 16.2, 7.3 Hz, 2H), 7.37 (s, 1H), 7.22 (s, 1H), 5.28 (d, *J* = 9.5 Hz, 1H), 4.49 (d, *J* = 9.6 Hz, 1H), 3.52 (t, *J* = 7.3 Hz, 2H), 1.58 (h, *J* = 7.4 Hz, 2H), 0.83 (t, *J* = 7.4 Hz, 3H); <sup>13</sup>C NMR (150 MHz, CDCl<sub>3</sub>): δ 174.2, 172.5, 141.2, 130.6, 129.2,

129.2, 128.9, 124.6, 124.1, 123.9, 119.2, 54.0, 41.9, 41.4, 20.8, 11.1; HRMS (ESI, *m/z*) calculated for C<sub>16</sub>H<sub>16</sub>N<sub>3</sub>O<sub>2</sub> (M + H)<sup>+</sup> 282.1243, found 282.1243.

**6-(tert-butyl)-4a,7a-dihydro-5H-imidazo[2,1-a]pyrrolo[3,4-c]isoquinoline-5,7(6H)-dione (3s)**

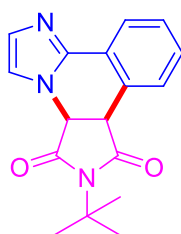

Pale yellow solid, 0.239 g, 89%; mp 282-284 °C; <sup>1</sup>H NMR (600 MHz, CDCl<sub>3</sub>): δ 8.15 (d, *J* = 7.7 Hz, 1H), 7.68 (d, *J* = 7.7 Hz, 1H), 7.40 (dt, *J* = 23.4, 7.5 Hz, 2H), 7.32 (s, 1H), 7.21 (s, 1H), 5.12 (d, *J* = 9.7 Hz, 1H), 4.35 (d, *J* = 9.7 Hz,

1H), 1.54 (s, 9H); <sup>13</sup>C NMR (150 MHz, CDCl<sub>3</sub>): δ 175.0, 173.4, 141.3, 130.4, 129.1, 128.8, 124.7, 124.5, 123.8, 119.2, 59.9, 54.3, 42.2, 28.1; HRMS (ESI, *m/z*) calculated for C<sub>17</sub>H<sub>18</sub>N<sub>3</sub>O<sub>2</sub> (M + H)<sup>+</sup> 296.1399, found 296.1397.

**2-phenyl-3a,13a-dihydro-1H-benzo[4,5]imidazo[2,1-a]pyrrolo[3,4-c]isoquinoline-1,3(2H)-dione (3t)**

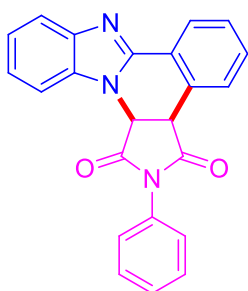

Yellow solid, 0.207 g, 73%; mp 255-257 °C; <sup>1</sup>H NMR (400 MHz, CDCl<sub>3</sub>): δ 8.44 (d, *J* = 7.3 Hz, 1H), 7.96 (d, *J* = 7.7 Hz, 1H), 7.79 (d, *J* = 7.8 Hz, 1H), 7.70 (d, *J* = 8.0 Hz, 1H), 7.55 – 7.27 (m, 9H), 6.13 (d, *J* = 8.2 Hz, 1H), 5.02 (d, *J* = 9.2 Hz, 1H); <sup>13</sup>C NMR (100 MHz, CDCl<sub>3</sub>): δ 172.7, 171.1, 144.6, 133.9, 132.1, 130.8, 129.6, 129.3, 128.3, 126.5, 126.1, 124.6, 118.2, 111.9, 53.6, 41.8; HRMS (ESI, *m/z*) calculated for

C<sub>23</sub>H<sub>16</sub>N<sub>3</sub>O<sub>2</sub> (M + H)<sup>+</sup> 366.1243, found 366.1246.

**2-(4-methoxyphenyl)-3a,13a-dihydro-1H-benzo[4,5]imidazo[2,1-a]pyrrolo[3,4-c]isoquinoline-1,3(2H)-dione(3u)**

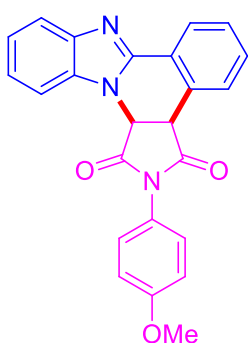

Pale yellow solid, 0.230 g, 75%; mp 241-243 °C; <sup>1</sup>H NMR (600 MHz, CDCl<sub>3</sub>) δ 8.52 – 8.44 (m, 1H), 7.99 – 7.90 (m, 1H), 7.81 (d, *J* = 7.5 Hz, 1H), 7.76 (d, *J* = 8.0 Hz, 1H), 7.59 – 7.46 (m, 2H), 7.39 – 7.30 (m, 2H), 7.19 (d, *J* = 9.0 Hz, 2H), 6.94 (d, *J* = 9.0 Hz, 2H), 5.86 (d, *J* = 9.7 Hz, 1H), 4.84 (d, *J* = 9.7 Hz, 1H), 3.80 (s, 3H); <sup>13</sup>C NMR (100 MHz, CDCl<sub>3</sub>): δ 173.2, 171.4, 159.9, 145.4, 134.7, 131.3, 129.4, 128.2, 127.3, 126.2, 124.0, 123.8, 123.4, 119.5, 114.5, 111.2, 55.5, 53.4, 41.7, 1.0;

HRMS (ESI, *m/z*) calculated for C<sub>24</sub>H<sub>18</sub>N<sub>3</sub>O<sub>3</sub> (M + H)<sup>+</sup> 396.1348, found 396.1343.

**2-(4-chlorophenyl)-3a,13a-dihydro-1H-benzo[4,5]imidazo[2,1-a]pyrrolo[3,4-c]isoquinoline-1,3(2H)-dione (3v)**

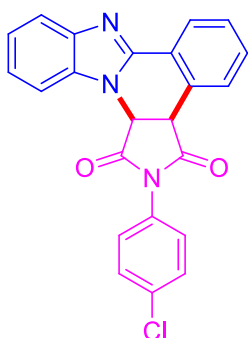

Off-white solid, 0.210 g, 68%; mp 262-264 °C; <sup>1</sup>H NMR (600 MHz, acetone-*d*<sub>6</sub>): δ 8.38 (dd, *J* = 7.5, 1.8 Hz, 1H), 7.96 (d, *J* = 7.7 Hz, 1H), 7.85 (d, *J* = 7.4 Hz, 1H), 7.69 (d, *J* = 7.3 Hz, 1H), 7.59 – 7.48 (m, 4H), 7.40 (d, *J* = 8.7 Hz, 2H), 7.33 – 7.25 (m, 2H), 6.29 (d, *J* = 9.9 Hz, 1H), 5.12 (d, *J* = 9.8 Hz, 1H); <sup>13</sup>C NMR (150 MHz, acetone-*d*<sub>6</sub>): δ 173.6, 172.1, 145.9, 144.2, 135.6, 133.8, 131.0, 130.4, 129.0, 128.6, 128.4,

128.3, 127.7, 125.4, 125.1, 122.9, 122.7, 119.3, 111.8, 53.6, 41.9; HRMS (ESI,  $m/z$ ) calculated for  $C_{23}H_{15}ClN_3O_2$  ( $M + H$ )<sup>+</sup> 400.0853, found 400.0858.

**2-propyl-3a,13a-dihydro-1H-benzo[4,5]imidazo[2,1-a]pyrrolo[3,4-c]isoquinoline-1,3(2H)-dione (3w)**

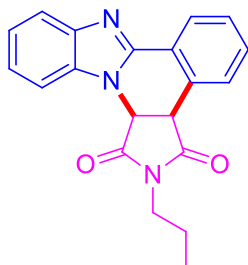

Pale yellow solid, 0.185 g, 80%; mp 162-164 °C; <sup>1</sup>H NMR (600 MHz, CDCl<sub>3</sub>): δ 8.35 (d,  $J = 9.2$  Hz, 1H), 7.84 (dd,  $J = 5.8, 2.6$  Hz, 1H), 7.80 – 7.73 (m, 1H), 7.69 – 7.58 (m, 1H), 7.51 – 7.37 (m, 2H), 7.34 – 7.24 (m, 2H), 5.46 (d,  $J = 9.7$  Hz, 1H), 4.54 (d,  $J = 9.7$  Hz, 1H), 3.54 – 3.37 (m, 2H), 1.54 (q,  $J = 7.4$  Hz, 2H), 0.78 (t,  $J = 7.4$  Hz, 3H); <sup>13</sup>C NMR (150 MHz, CDCl<sub>3</sub>): δ 174.1, 172.4, 145.5, 143.8, 134.9, 130.8, 129.1, 128.1, 126.3, 125.8, 124.3, 123.7, 123.4, 119.7, 53.0, 41.5, 41.3, 20.8, 11.1; HRMS (ESI,  $m/z$ ) calculated for  $C_{20}H_{18}N_3O_2$  ( $M + H$ )<sup>+</sup> 332.1399, found 332.1393.

**2-isobutyl-3a,13a-dihydro-1H-benzo[4,5]imidazo[2,1-a]pyrrolo[3,4-c]isoquinoline-1,3(2H)-dione (3x)**

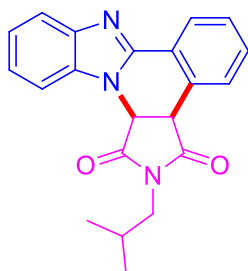

Yellow solid, 0.192 g, 75%; mp 192-194 °C; <sup>1</sup>H NMR (400 MHz, CDCl<sub>3</sub>): δ 8.31 (dd,  $J = 5.6, 3.7$  Hz, 1H), 7.78 (dd,  $J = 5.6, 4.0$  Hz, 1H), 7.76 – 7.70 (m, 1H), 7.56 (dd,  $J = 6.6, 2.1$  Hz, 1H), 7.44 – 7.36 (m, 2H), 7.29 – 7.18 (m, 2H), 5.42 (d,  $J = 9.7$  Hz, 1H), 4.49 (d,  $J = 9.8$  Hz, 1H), 3.35 – 3.21 (m, 2H), 1.91 (dp,  $J = 14.0, 6.9$  Hz, 1H), 0.73 (dd,  $J = 6.7, 4.5$  Hz, 6H); <sup>13</sup>C NMR (100 MHz, CDCl<sub>3</sub>): δ 174.3, 172.6, 145.4, 143.5, 134.8, 130.8, 129.1, 128.0, 126.4, 125.7, 124.0, 123.7, 123.5, 119.5, 111.1, 52.9, 46.7, 41.5, 26.9, 19.9, 19.8; HRMS (ESI,  $m/z$ ) calculated for  $C_{21}H_{20}N_3O_2$  ( $M + H$ )<sup>+</sup> 346.1556, found 346.1554.

**2-(tert-butyl)-3a,13a-dihydro-1H-benzo[4,5]imidazo[2,1-a]pyrrolo[3,4-c]isoquinoline-1,3(2H)-dione (3y)**

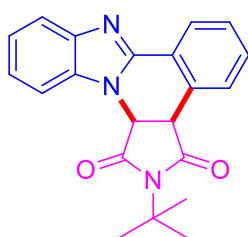

Pale yellow solid, 0.227 g, 85%; mp 144-146 °C; <sup>1</sup>H NMR (600 MHz, CDCl<sub>3</sub>): δ 8.37 (dd,  $J = 5.6, 3.5$  Hz, 1H), 7.85 – 7.80 (m, 1H), 7.81 – 7.75 (m, 1H), 7.63 – 7.57 (m, 1H), 7.46 (dd,  $J = 5.8, 3.3$  Hz, 2H), 7.30 (dd,  $J = 6.0, 3.1$  Hz, 2H), 5.39 (d,  $J = 9.8$  Hz, 1H), 4.44 (d,  $J = 9.8$  Hz, 1H), 1.53 (s, 9H); <sup>13</sup>C NMR (150 MHz, CDCl<sub>3</sub>): δ 174.9, 173.3, 145.7, 143.9, 135.1, 130.8, 129.1, 127.8, 126.6, 125.9, 124.5, 123.7, 123.3, 119.8, 110.8, 59.9, 53.3,

42.0, 28.2; HRMS (ESI,  $m/z$ ) calculated for  $C_{21}H_{20}N_3O_2$  ( $M + H$ )<sup>+</sup> 346.1556, found 346.1557.

**2-(2-methoxyethyl)-3a,13a-dihydro-1H-benzo[4,5]imidazo[2,1-a]pyrrolo[3,4-c]isoquinoline-1,3(2H)-dione (3z)**

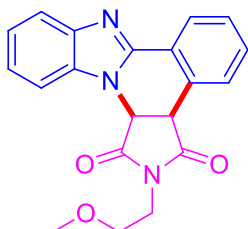

Pale yellow solid, 0.215 g, 80%; mp 174-176 °C; <sup>1</sup>H NMR (400 MHz, CDCl<sub>3</sub>): δ 8.37 (d,  $J = 7.4$  Hz, 1H), 7.86 (d,  $J = 7.4$  Hz, 1H), 7.72 (dd,  $J = 19.5, 7.7$  Hz, 2H), 7.44 (p,  $J = 7.4$  Hz, 2H), 7.36 – 7.23 (m, 2H), 5.66 (d,  $J = 9.8$  Hz, 1H), 4.67 (d,  $J = 9.8$  Hz, 1H), 3.81 – 3.65 (m, 2H), 3.52 (t,  $J = 5.4$  Hz, 2H), 3.21 (s, 3H); <sup>13</sup>C NMR (100 MHz, CDCl<sub>3</sub>): δ 173.9, 172.2, 145.3, 142.6, 134.6, 131.1, 129.2, 128.2, 126.5, 126.0, 123.9, 123.8, 123.6, 119.2, 111.4, 68.0, 58.5, 53.1, 41.5, 39.0, 30.9; HRMS (ESI,  $m/z$ ) calculated for  $C_{20}H_{18}N_3O_3$  ( $M + H$ )<sup>+</sup> 348.1348, found 348.1345.

**2-benzyl-3a,13a-dihydro-1H-benzo[4,5]imidazo[2,1-a]pyrrolo[3,4-c]isoquinoline-1,3(2H)-dione (3za)**

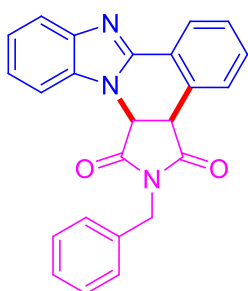

Off-white solid, 0.220 g, 75%; mp 225-227 °C; <sup>1</sup>H NMR (400 MHz, CDCl<sub>3</sub>): δ 8.47 – 8.38 (m, 1H), 7.91 (d,  $J = 7.7$  Hz, 1H), 7.76 (d,  $J = 9.3$  Hz, 2H), 7.54 – 7.40 (m, 2H), 7.39 – 7.26 (m, 7H), 5.73 (d,  $J = 9.8$  Hz, 1H), 4.74 (d,  $J = 9.8$  Hz, 1H), 4.68 (d,  $J = 2.1$  Hz, 2H); <sup>13</sup>C NMR (100 MHz, CDCl<sub>3</sub>): δ 173.4, 171.7, 144.7, 134.5, 134.0, 131.8, 129.4, 128.9, 128.9, 128.5, 128.3, 126.5, 126.4, 124.4, 118.5, 111.7, 53.3, 43.5, 41.6; HRMS (ESI,  $m/z$ ) calculated for  $C_{24}H_{18}N_3O_2$  ( $M + H$ )<sup>+</sup> 380.1399, found 380.1396.

**2-(4-methoxybenzyl)-3a,13a-dihydro-1H-benzo[4,5]imidazo[2,1-a]pyrrolo[3,4-c]isoquinoline-1,3(2H)-dione (3zb)**

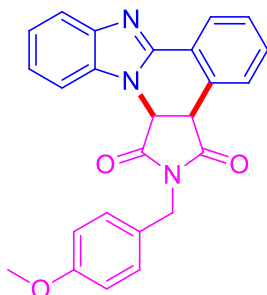

Pale yellow solid, 0.241 g, 76%; mp 243-245 °C; <sup>1</sup>H NMR (400 MHz, CDCl<sub>3</sub>): δ 8.39 (s, 1H), 7.87 (d,  $J = 5.2$  Hz, 1H), 7.78 (s, 1H), 7.69 (d,  $J = 4.9$  Hz, 1H), 7.53 – 7.42 (m, 2H), 7.29 (q,  $J = 7.7, 6.5$  Hz, 4H), 6.80 (d,  $J = 8.2$  Hz, 2H), 5.53 (d,  $J = 9.8$  Hz, 1H), 4.59 (s, 3H), 3.76 (s, 3H); <sup>13</sup>C NMR (100 MHz, CDCl<sub>3</sub>): δ 173.8, 172.0, 159.6, 145.5, 143.7, 134.9, 130.9, 130.5, 129.2, 128.2, 126.8, 126.1, 125.9, 124.3, 123.7, 123.5, 119.8, 114.1, 111.1, 55.3, 53.1, 42.9, 41.5; HRMS (ESI,  $m/z$ ) calculated for  $C_{25}H_{20}N_3O_3$  ( $M + H$ )<sup>+</sup> 410.1505, found 410.1507.

**3a, 13a-dihydro-1H-benzo [4, 5] imidazo [2, 1-a] pyrrolo [3, 4-c]isoquinoline-1, 3 (2H)-dione (3zc)**

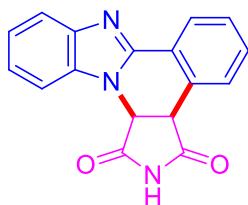

Yellow solid, 9 mg, 12%, <sup>1</sup>H NMR (400 MHz, DMSO-*d*<sub>6</sub>) δ 8.27 – 8.22 (m, 1H), 7.80 (d, *J* = 7.5 Hz, 1H), 7.75 (d, *J* = 7.9 Hz, 1H), 7.69 (d, *J* = 7.8 Hz, 1H), 7.52 (p, *J* = 7.1 Hz, 2H), 7.28 (m, 2H), 6.12 (d, *J* = 9.6 Hz, 1H), 4.81 (d, *J* = 9.6 Hz, 1H). <sup>13</sup>C NMR (101 MHz, DMSO-*d*<sub>6</sub>) δ 176.4, 175.4, 145.9, 143.8, 135.5, 131.1, 129.1, 128.7, 128.3, 125.6, 124.6, 123.4, 123.2, 119.5, 112.2, 54.3, 43.2. HRMS (ESI, *m/z*) calculated for C<sub>17</sub>H<sub>11</sub>N<sub>3</sub>O<sub>2</sub> (M+H)<sup>+</sup> 290.0930, found 290.0926.

**1',4-dimethylspiro[benzo[4,5]imidazo[2,1-*a*]isoindole-11,3'-pyrrolidine]-2',5'-dione (5aa)**

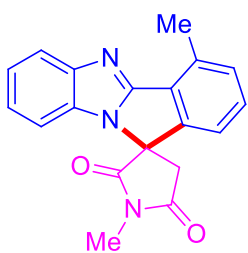

Pale yellow solid, 50 mg, 65%; mp 261-263 °C; <sup>1</sup>H NMR (400 MHz, acetone-*d*<sub>6</sub>): δ 7.79 (d, *J* = 7.6 Hz, 1H), 7.55 (d, *J* = 6.7 Hz, 1H), 7.48 (d, *J* = 8.9 Hz, 3H), 7.31 – 7.24 (m, 2H), 3.75 (d, *J* = 18.5 Hz, 1H), 3.54 (d, *J* = 18.5 Hz, 1H), 3.18 (s, 3H), 2.86 (s, 3H); <sup>13</sup>C NMR (100 MHz, acetone-*d*<sub>6</sub>): δ 173.9, 173.6, 159.0, 150.1, 148.4, 135.8, 132.3, 131.6, 131.3, 127.9, 124.1, 123.3, 121.6, 120.5, 110.2, 67.6, 39.6, 26.1, 18.5; HRMS (ESI, *m/z*) calculated for C<sub>19</sub>H<sub>16</sub>N<sub>3</sub>O<sub>2</sub> (M + H)<sup>+</sup> 318.1243, found 318.1241.

**2,7-dimethyl-3a,13a-dihydro-1H-benzo[4,5]imidazo[2,1-*a*]pyrrolo[3,4-*c*]isoquinoline-1, 3(2H)-dione (3aa)**

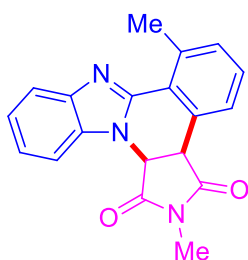

Pale yellow solid, 14 mg, 19%; <sup>1</sup>H NMR (400 MHz, CDCl<sub>3</sub>) δ 7.87 (d, *J* = 8.0 Hz, 1H), 7.79 (d, *J* = 7.7 Hz, 1H), 7.70 (d, *J* = 8.0 Hz, 1H), 7.41 – 7.36 (m, 1H), 7.34 (d, *J* = 3.5 Hz, 1H), 7.33 – 7.30 (m, 1H), 7.28 (d, *J* = 7.7 Hz, 1H), 5.74 (s, 1H), 4.69 (d, *J* = 9.5 Hz, 1H), 3.04 (s, 3H), 2.99 (s, 3H); <sup>13</sup>C NMR (100 MHz, CDCl<sub>3</sub>): δ 174.2, 172.4, 139.6, 132.6, 130.5, 127.8, 125.9, 124.3, 123.7, 119.4, 110.9, 53.1, 42.3, 25.7, 24.0; HRMS (ESI, *m/z*) calculated for C<sub>19</sub>H<sub>16</sub>N<sub>3</sub>O<sub>2</sub> (M + H)<sup>+</sup> 318.1243, found 318.1238.

**4-ethyl-1'-methylspiro[benzo[4,5]imidazo[2,1-*a*]isoindole-11,3'-pyrrolidine]-2',5'-dione (5ab)**

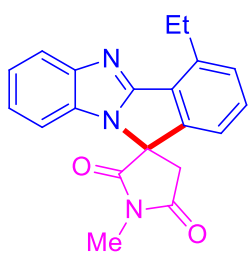

Pale yellow solid, 55 mg, 74%; mp 230-232 °C;  $^1\text{H}$  NMR (400 MHz,  $\text{CDCl}_3$ ):  $\delta$  7.93 (d,  $J = 7.4$  Hz, 1H), 7.45 (d,  $J = 1.6$  Hz, 1H), 7.44 (s, 1H), 7.34 – 7.25 (m, 3H), 7.20-7.16 (m, 1H), 7.09 (d,  $J = 6.6$  Hz, 1H), 3.54 (d,  $J = 18.7$  Hz, 1H), 3.36 (m, 3H), 3.28 (s, 3H), 1.44 (t,  $J = 7.6$  Hz, 3H);  $^{13}\text{C}$  NMR (100 MHz,  $\text{CDCl}_3$ ):  $\delta$  172.9, 172.8, 157.9, 149.2, 146.6, 142.3, 130.7, 130.1, 130.0, 126.8, 123.6, 122.9, 121.5, 118.6, 108.1, 65.9, 39.2, 26.1, 25.6, 14.4; HRMS (ESI,  $m/z$ ) calculated for  $\text{C}_{20}\text{H}_{18}\text{N}_3\text{O}_2$  ( $\text{M} + \text{H}$ ) $^+$  332.1399, found 332.1399.

**7-ethyl-2-methyl-3a,13a-dihydro-1H-benzo[4,5]imidazo[2,1-a]pyrrolo[3,4-c]isoquinoline-1,3(2H)-dione (3ab)**

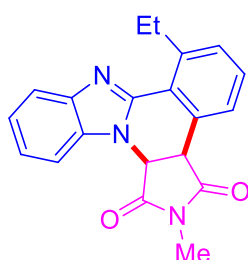

Pale yellow solid, 6 mg, 8%;  $^1\text{H}$  NMR (400 MHz,  $\text{CDCl}_3$ ):  $\delta$  7.84 (d,  $J = 7.8$  Hz, 1H), 7.78 (d,  $J = 7.5$  Hz, 1H), 7.70 – 7.66 (m, 1H), 7.43 – 7.27 (m, 4H), 5.65 (d,  $J = 9.6$  Hz, 1H), 4.66 (d,  $J = 9.6$  Hz, 1H), 3.68-3.63 (m, 1H), 3.54-3.49 (m, 1H), 3.05 (s, 3H), 1.33 (t,  $J = 7.4$  Hz, 3H);  $^{13}\text{C}$  NMR (100 MHz,  $\text{CDCl}_3$ ):  $\delta$  174.4, 172.5, 145.8, 134.0, 130.9, 130.3, 127.6, 125.8, 123.9, 123.3, 119.9, 110.4, 53.0, 42.4, 28.4, 25.6, 15.1; HRMS (ESI,  $m/z$ ) calculated for  $\text{C}_{20}\text{H}_{18}\text{N}_3\text{O}_2$  ( $\text{M} + \text{H}$ ) $^+$  332.1399, found 332.1392.

**4-fluoro-1'-methylspiro[benzo[4,5]imidazo[2,1-a]isoindole-11,3'-pyrrolidine]-2',5'-dione (5ac)**

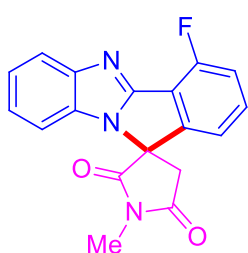

Pale yellow solid, 19 mg, 25%; mp 207-209 °C;  $^1\text{H}$  NMR (400 MHz, acetone- $d_6$ ):  $\delta$  7.99 (d,  $J = 7.7$  Hz, 1H), 7.57 (d,  $J = 6.4$  Hz, 1H), 7.40 – 7.31 (m, 3H), 7.21 (d,  $J = 7.5$  Hz, 1H), 7.12 (d,  $J = 7.5$  Hz, 1H), 3.61 (d,  $J = 18.4$  Hz, 1H), 3.44 (d,  $J = 18.4$  Hz, 1H), 3.29 (s, 3H);  $^{13}\text{C}$  NMR (100 MHz,  $\text{CDCl}_3$ ):  $\delta$  172.1, 171.7, 158.6, 156.0, 153.5, 148.5, 133.2, 129.7, 124.6, 123.9 (d,  $J_{\text{C-F}} = 3.16$  Hz), 121.7, 118.3 (d,  $J_{\text{C-F}} = 18.2$  Hz), 117.5 (d,  $J_{\text{C-F}} = 3.1$  Hz), 108.3, 66.8, 39.0, 29.7, 26.3;  $^{19}\text{F}$  NMR (376 MHz,  $\text{CDCl}_3$ ):  $\delta$  -111.3; HRMS (ESI,  $m/z$ ) calculated for  $\text{C}_{18}\text{H}_{13}\text{FN}_3\text{O}_2$  ( $\text{M} + \text{H}$ ) $^+$  322.0992, found 322.0988.

**7-fluoro-2-methyl-3a,13a-dihydro-1H-benzo[4,5]imidazo[2,1-a]pyrrolo[3,4-c]isoquinoline-1,3(2H)-dione (3ac)**

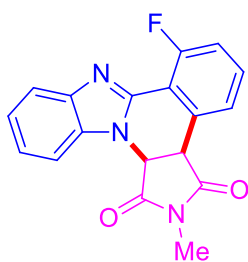

Pale yellow solid, 31 mg, 41%;  $^1\text{H NMR}$  (400 MHz,  $\text{CDCl}_3$ ):  $\delta$  7.92 (d,  $J = 8.1$  Hz, 1H), 7.84 – 7.80 (m, 2H), 7.55 – 7.50 (m, 1H), 7.37 (t,  $J = 7.7$  Hz, 1H), 7.25 – 7.20 (m, 2H), 6.12 (d,  $J = 3.8$  Hz, 1H), 4.90 (d,  $J = 9.1$  Hz, 1H), 3.07 (s, 3H); HRMS (ESI,  $m/z$ ) calculated for  $\text{C}_{18}\text{H}_{13}\text{FN}_3\text{O}_2$  ( $\text{M} + \text{H}$ ) $^+$  322.0992, found 322.0986.

**4-chloro-1'-methylspiro[benzo[4,5]imidazo[2,1-a]isoindole-11,3'-pyrrolidine]-2',5'-dione (5ad)**

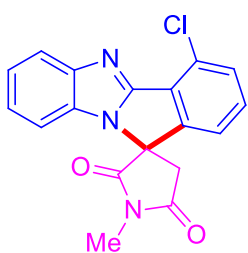

Pale yellow solid, 36 mg, 49%; mp 227-229 °C;  $^1\text{H NMR}$  (400 MHz,  $\text{CDCl}_3$ ):  $\delta$  8.01 (d,  $J = 7.7$  Hz, 1H), 7.59 (d,  $J = 8.1$  Hz, 1H), 7.47 (t,  $J = 7.9$  Hz, 1H), 7.38 – 7.28 (m, 3H), 7.10 (d,  $J = 7.5$  Hz, 1H), 3.56 (d,  $J = 18.8$  Hz, 1H), 3.39 (d,  $J = 18.7$  Hz, 1H), 3.29 (s, 3H);  $^{13}\text{C NMR}$  (150 MHz,  $\text{CDCl}_3$ ):  $\delta$  173.4, 171.6, 144.5, 134.4, 132.0, 129.4, 128.9, 128.9, 128.5, 128.3, 126.6, 126.5, 124.6, 118.2, 111.9, 53.4, 43.5, 41.6; HRMS (ESI,  $m/z$ ) calculated for  $\text{C}_{18}\text{H}_{13}\text{ClN}_3\text{O}_2$  ( $\text{M} + \text{H}$ ) $^+$  338.0696, found 338.0695.

**7-chloro-2-methyl-3a,13a-dihydro-1H-benzo[4,5]imidazo[2,1-a]pyrrolo[3,4-c]isoquinoline-1,3(2H)-dione (3ad)**

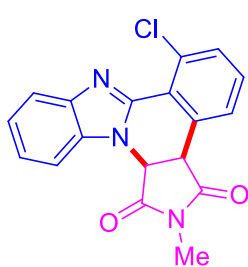

Pale yellow solid, 7 mg, 9%;  $^1\text{H NMR}$  (400 MHz,  $\text{CDCl}_3$ ):  $\delta$  7.93 (d,  $J = 7.7$  Hz, 1H), 7.88 (d,  $J = 7.9$  Hz, 1H), 7.70 (d,  $J = 7.9$  Hz, 1H), 7.58 (d,  $J = 8.0$  Hz, 1H), 7.54 – 7.49 (m, 1H), 7.41 – 7.35 (m, 2H), 5.64 (d,  $J = 9.9$  Hz, 1H), 4.68 (d,  $J = 9.7$  Hz, 1H), 3.08 (s, 3H); HRMS (ESI,  $m/z$ ) calculated for  $\text{C}_{18}\text{H}_{13}\text{ClN}_3\text{O}_2$  ( $\text{M} + \text{H}$ ) $^+$  338.0696.

**4-bromo-1'-methylspiro[benzo[4,5]imidazo[2,1-a]isoindole-11,3'-pyrrolidine]-2',5'-dione (5ae)**

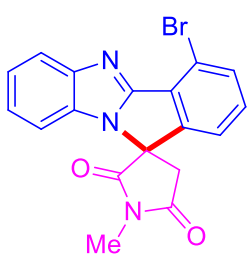

Off-white solid, 35 mg, 50%; mp 235-237 °C;  $^1\text{H NMR}$  (600 MHz,  $\text{CDCl}_3$ ):  $\delta$  8.03 (d,  $J = 7.6$  Hz, 1H), 7.77 (d,  $J = 7.8$  Hz, 1H), 7.36 (m, 4H), 7.09 (d,  $J = 7.4$  Hz, 1H), 3.56 (d,  $J = 18.6$  Hz, 1H), 3.39 (d,  $J = 18.6$  Hz, 1H), 3.28 (s, 3H);  $^{13}\text{C NMR}$  (150 MHz,  $\text{CDCl}_3$ ):  $\delta$  172.2, 171.9, 155.6, 148.1, 134.8, 131.5, 129.8, 129.0, 124.5, 123.5, 122.3,



120.2, 117.8, 108.2, 66.0, 39.0, 26.2; HRMS (ESI,  $m/z$ ) calculated for  $C_{18}H_{13}BrN_3O_2$  ( $M + H$ )<sup>+</sup> 382.0191, found 382.0183.

#### 4-iodo-1'-methylspiro[benzo[4,5]imidazo[2,1-a]isoindole-11,3'-pyrrolidine]-2',5'-dione

(5af)

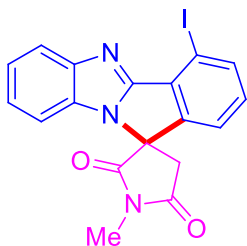

white solid, 13 mg, 19%; <sup>1</sup>H NMR (600 MHz, CDCl<sub>3</sub>): δ 8.06 – 8.00 (m, 2H), 7.36 – 7.29 (m, 3H), 7.21 (t,  $J = 7.8$  Hz, 1H), 7.08 (d,  $J = 6.5$  Hz, 1H), 3.54 (d,  $J = 18.7$  Hz, 1H), 3.37 (d,  $J = 18.7$  Hz, 1H), 3.28 (s, 3H); HRMS (ESI,  $m/z$ ) calculated for  $C_{18}H_{13}BrN_3O_2$  ( $M + H$ )<sup>+</sup> 430.0052, found 430.0046.

#### 2-methyl-3a,13a-dihydro-1H-benzo[4,5]imidazo[2,1-a]pyrrolo[3,4-c]isoquinoline-1,3(2H)-dione (3a)

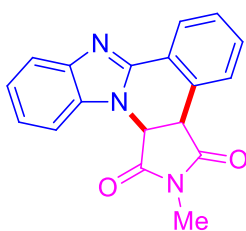

Off-white solid, 13 mg, 27%; <sup>1</sup>H NMR (600 MHz, CDCl<sub>3</sub>): δ 8.44-8.41 (m, 1H), 7.91 (d,  $J = 7.2$  Hz, 1H), 7.80 – 7.73 (m, 2H), 7.53 – 7.45 (m, 2H), 7.38-7.29 (m, 2H), 5.69 (d,  $J = 9.8$  Hz, 1H), 4.71 (d,  $J = 9.8$  Hz, 1H), 3.06 (s, 3H); <sup>13</sup>C NMR (150 MHz, CDCl<sub>3</sub>): δ 174.0, 172.3, 145.4, 134.8, 130.9, 129.3, 128.3, 126.2, 125.9, 124.2, 123.8, 123.6, 119.7, 111.1, 53.2, 41.6, 25.7; HRMS (ESI,  $m/z$ ) calculated for  $C_{18}H_{13}BrN_3O_2$  ( $M + H$ )<sup>+</sup> 304.1086, found 304.1080.

#### 1'-methyl-4-(trifluoromethyl)spiro[benzo[4,5]imidazo[2,1-a]isoindole-11,3'-pyrrolidine]-2',5'-dione (5ag)

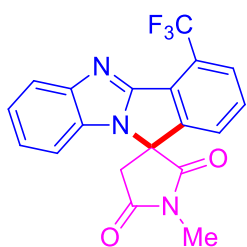

Pale yellow solid, 39 mg, 55%; mp 244-246 °C; <sup>1</sup>H NMR (400 MHz, CDCl<sub>3</sub>): δ 8.11 – 7.96 (m, 1H), 7.90 (d,  $J = 7.8$  Hz, 1H), 7.65 (t,  $J = 7.8$  Hz, 1H), 7.57 (d,  $J = 7.7$  Hz, 1H), 7.35 (tt,  $J = 6.8, 3.7$  Hz, 2H), 7.10 (d,  $J = 7.4$  Hz, 1H), 3.58 (d,  $J = 18.7$  Hz, 1H), 3.42 (d,  $J = 18.7$  Hz, 1H), 3.30 (s, 3H); <sup>13</sup>C NMR (100 MHz, CDCl<sub>3</sub>): δ 172.2, 171.8, 154.1, 148.7, 148.0, 130.6, 129.9, 127.7 (q,  $J_{C-CF} = 4.9$  Hz), 126.9, 126.1, 125.8, 125.5 (q,  $J_{C-F} = 271.73$  Hz), 124.8, 124.7, 123.7, 122.5, 108.2, 66.0, 38.9, 26.3; HRMS (ESI,  $m/z$ ) calculated for  $C_{19}H_{13}F_3N_3O_2$  ( $M + H$ )<sup>+</sup> 372.0960, found 372.0960.

**1'-methyl-4-phenylspiro[benzo[4,5]imidazo[2,1-*a*]isoindole-11,3'-pyrrolidine]-2',5'-dione (5ah)**

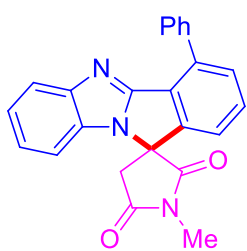

Pale yellow solid, 42 mg, 60%; mp 147-149 °C; <sup>1</sup>H NMR (600 MHz, CDCl<sub>3</sub>): δ 7.88 – 7.84 (m, 2H), 7.83 – 7.80 (m, 1H), 7.61 – 7.47 (m, 5H), 7.32 (d, *J* = 5.8 Hz, 1H), 7.26 (d, *J* = 5.7 Hz, 2H), 7.10 – 7.05 (m, 1H), 3.58 (d, *J* = 18.7 Hz, 1H), 3.42 (d, *J* = 18.7 Hz, 1H), 3.30 (s, 3H); <sup>13</sup>C NMR (100 MHz, CDCl<sub>3</sub>): δ 172.8, 172.8, 157.3, 148.8, 147.5, 139.5, 137.2, 132.1, 130.6, 130.1, 129.5, 128.8, 128.4, 125.9, 123.7, 122.9, 122.0, 119.9, 107.9, 65.6, 39.3, 26.1.; HRMS (ESI, *m/z*) calculated for C<sub>24</sub>H<sub>18</sub>N<sub>3</sub>O<sub>2</sub> (M + H)<sup>+</sup> 380.1399, found 380.1396.

**2-methyl-7-phenyl-3a,13a-dihydro-1H-benzo[4,5]imidazo[2,1-*a*]pyrrolo[3,4-*c*]isoquinoline-1,3(2H)-dione (3ah)**

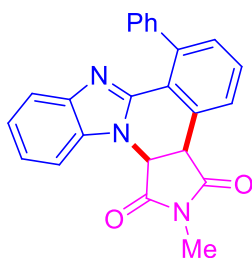

Off-white solid, 15 mg, 21%; <sup>1</sup>H NMR (400 MHz, CDCl<sub>3</sub>): δ 7.91 (d, *J* = 7.8 Hz, 1H), 7.57 (d, *J* = 8.0 Hz, 1H), 7.49 (t, *J* = 7.8 Hz, 1H), 7.44 (d, *J* = 8.1 Hz, 1H), 7.37 (q, *J* = 6.1, 5.6 Hz, 6H), 7.27 – 7.23 (m, 2H), 7.18 – 7.15 (m, 1H), 5.64 (d, *J* = 9.6 Hz, 1H), 4.64 (d, *J* = 9.5 Hz, 1H), 3.07 (s, 3H); <sup>13</sup>C NMR (100 MHz, CDCl<sub>3</sub>): δ 174.3, 172.7, 144.7, 142.6, 141.7, 134.3, 132.7, 129.9, 129.5, 129.3, 128.4, 128.3, 127.9, 127.3, 123.9, 123.7, 123.1, 122.3, 120.3, 110.0, 53.1, 42.4, 25.7; HRMS (ESI, *m/z*) calculated for C<sub>24</sub>H<sub>18</sub>N<sub>3</sub>O<sub>2</sub> (M + H)<sup>+</sup> 380.1399, found 381.1392.

**3,4-dimethoxy-1'-methylspiro[benzo[4,5]imidazo[2,1-*a*]isoindole-11,3'-pyrrolidine]-2',5'-dione (5ai)**

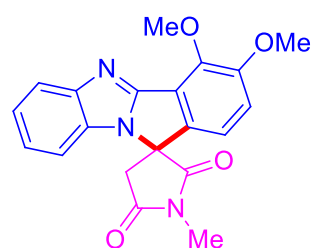

Off-white solid, 33 mg, 46%; mp 239-241 °C; <sup>1</sup>H NMR (400 MHz, CDCl<sub>3</sub>): δ 7.91 (d, *J* = 8.3 Hz, 1H), 7.32 – 7.25 (m, 2H), 7.05 (d, *J* = 7.1 Hz, 1H), 6.98 (s, 2H), 4.28 (s, 3H), 3.91 (s, 3H), 3.54 (d, *J* = 18.6 Hz, 1H), 3.35 (d, *J* = 18.7 Hz, 1H), 3.24 (s, 3H); <sup>13</sup>C NMR (100 MHz, CDCl<sub>3</sub>): δ 172.8, 172.8, 155.6, 154.1, 148.8, 145.6, 138.9, 130.02, 123.78, 122.97, 121.64, 121.55, 116.4, 114.5, 108.0, 65.7, 61.9, 56.5, 39.4, 26.0; HRMS (ESI, *m/z*) calculated for C<sub>20</sub>H<sub>18</sub>N<sub>3</sub>O<sub>4</sub> (M + H)<sup>+</sup> 364.1297, found 364.1298.

**6,7-dimethoxy-2-methyl-3a,13a-dihydro-1H-benzo[4,5]imidazo[2,1-a]pyrrolo[3,4-c]isoquinoline-1,3(2H)-dione (3ai)**

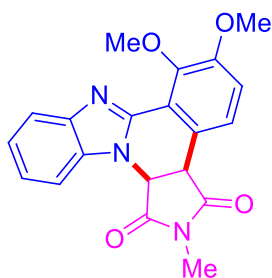

Off-white solid, 23 mg, 32%;  $^1\text{H}$  NMR (400 MHz,  $\text{CDCl}_3$ ):  $\delta$  7.90 (d,  $J = 8.9$  Hz, 1H), 7.64 – 7.57 (m, 2H), 7.35 – 7.27 (m, 2H), 7.01 (d,  $J = 8.7$  Hz, 1H), 5.62 (d,  $J = 9.6$  Hz, 1H), 4.59 (d,  $J = 9.6$  Hz, 1H), 4.00 (s, 3H), 3.90 (s, 3H), 3.03 (s, 3H);  $^{13}\text{C}$  NMR (100 MHz,  $\text{CDCl}_3$ ):  $\delta$  174.5, 172.5, 154.1, 148.4, 143.1, 133.9, 123.9, 123.8, 123.3, 120.5,

119.5, 114.7, 114.4, 110.4, 108.0, 61.0, 56.3, 53.1, 41.4, 25.6; HRMS (ESI,  $m/z$ ) calculated for  $\text{C}_{20}\text{H}_{18}\text{N}_3\text{O}_4$  ( $\text{M} + \text{H}$ ) $^+$  364.1297, found 364.1296.

**1',4,6-trimethylspiro[benzo[4,5]imidazo[2,1-a]isoindole-11,3'-pyrrolidine]-2',5'-dione (5aj)**

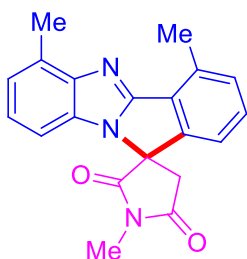

Yellow solid, 45 mg, 61%; mp 206-208 °C;  $^1\text{H}$  NMR (400 MHz,  $\text{CDCl}_3$ ):  $\delta$  7.40 – 7.35 (m, 2H), 7.16 (t,  $J = 7.4$  Hz, 2H), 7.11 (d,  $J = 7.3$  Hz, 1H), 6.91 (d,  $J = 7.8$  Hz, 1H), 3.53 (d,  $J = 18.5$  Hz, 1H), 3.35 (d,  $J = 18.6$  Hz, 1H), 3.27 (s, 3H), 2.93 (s, 3H), 2.74 (s, 3H);  $^{13}\text{C}$  NMR (101 MHz,  $\text{CDCl}_3$ ):  $\delta$  172.9, 172.9, 157.3, 148.5, 146.5, 135.9, 131.9, 131.7, 130.1,

129.8, 127.6, 123.5, 123.4, 118.4, 105.5, 65.9, 39.2, 26.1, 18.7, 16.9; HRMS (ESI,  $m/z$ ) calculated for  $\text{C}_{20}\text{H}_{18}\text{N}_3\text{O}_2$  ( $\text{M} + \text{H}$ ) $^+$  332.1399, found 332.1398.

**2,7,9-trimethyl-3a,13a-dihydro-1H-benzo[4,5]imidazo[2,1-a]pyrrolo[3,4-c]isoquinoline-1,3(2H)-dione (3aj)**

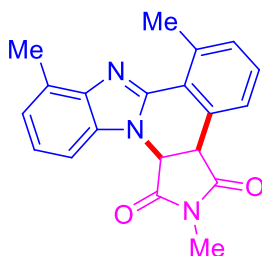

White solid, 10 mg, 14%;  $^1\text{H}$  NMR (400 MHz,  $\text{CDCl}_3$ ):  $\delta$  7.74 (d,  $J = 6.8$  Hz, 1H), 7.48 (d,  $J = 8.1$  Hz, 1H), 7.36 – 7.30 (m, 2H), 7.23 (d,  $J = 7.8$  Hz, 1H), 7.12 (d,  $J = 7.2$  Hz, 1H), 5.52 (d,  $J = 9.5$  Hz, 1H), 4.60 (d,  $J = 9.4$  Hz, 1H), 3.02 (s, 6H), 2.70 (s, 3H);  $^{13}\text{C}$  NMR (101 MHz,  $\text{CDCl}_3$ ):  $\delta$  174.5, 172.6, 145.1, 143.3, 139.5, 133.8, 132.5, 130.3,

129.5, 127.2, 125.7, 123.7, 123.3, 123.3, 107.7, 53.1, 42.4, 25.6, 23.9, 16.5; HRMS (ESI,  $m/z$ ) calculated for  $\text{C}_{20}\text{H}_{18}\text{N}_3\text{O}_2$  ( $\text{M} + \text{H}$ ) $^+$  332.1399, found 332.1391.

**1',4,7,8-tetramethylspiro[benzo[4,5]imidazo[2,1-*a*]isoindole-11,3'-pyrrolidine]-2',5'-dione (5ak)**

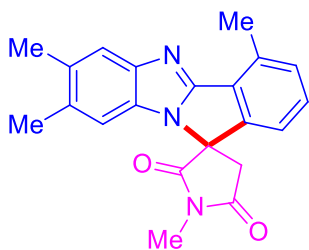

Yellow solid, 96 mg, 66%; mp 234-236 °C; <sup>1</sup>H NMR (400 MHz, CDCl<sub>3</sub>): δ 7.68 (s, 1H), 7.46 – 7.30 (m, 2H), 7.21 – 7.11 (m, 1H), 6.83 (s, 1H), 3.53 (d, *J* = 18.6 Hz, 1H), 3.34 (d, *J* = 18.6 Hz, 1H), 3.28 (s, 3H), 2.88 (s, 3H), 2.37 (s, 3H), 2.36 (s, 3H); <sup>13</sup>C NMR (100 MHz, CDCl<sub>3</sub>): δ 172.7, 172.7, 146.5, 136.0, 133.6, 132.5, 132.1, 130.5, 128.1, 127.0, 121.2, 118.4, 108.5, 66.2, 39.0, 26.2, 20.6, 20.4, 19.1; HRMS (ESI, *m/z*) calculated for C<sub>21</sub>H<sub>20</sub>N<sub>3</sub>O<sub>2</sub> (M + H)<sup>+</sup> 346.1556, found 346.1546.

**2,7,10,11-tetramethyl-3a,13a-dihydro-1H-benzo[4,5]imidazo[2,1-*a*]pyrrolo[3,4-*c*]isoxaline-1,3(2H)-dione (3ak)**

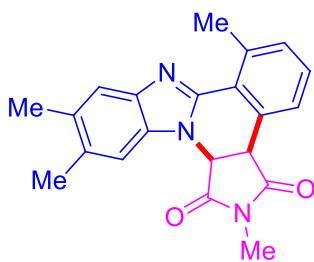

Yellow solid, 19 mg, 13%; <sup>1</sup>H NMR (400 MHz, CDCl<sub>3</sub>): δ 7.79 (d, *J* = 7.6 Hz, 1H), 7.68 (s, 1H), 7.47 (s, 1H), 7.36 (t, *J* = 7.6 Hz, 1H), 7.30 (d, *J* = 7.5 Hz, 1H), 5.84 (s, 1H), 4.69 (d, *J* = 8.6 Hz, 1H), 3.02 (s, 3H), 2.96 (s, 3H), 2.37 (s, 3H), 2.30 (s, 3H); <sup>13</sup>C NMR (100 MHz, CDCl<sub>3</sub>): δ 174.3, 172.6, 139.2, 133.8, 132.5, 131.9, 130.2, 127.5, 125.9, 119.2, 110.9, 53.1, 42.3, 25.6, 24.1, 20.7, 20.3; HRMS (ESI, *m/z*) calculated for C<sub>21</sub>H<sub>20</sub>N<sub>3</sub>O<sub>2</sub> (M + H)<sup>+</sup> 346.1556, found 346.1548.

**1',4,7-trimethylspiro[benzo[4,5]imidazo[2,1-*a*]isoindole-11,3'-pyrrolidine]-2',5'-dione & 1',4,8-trimethylspiro [benzo[4,5]imidazo [2,1-*a*]isoindole-11,3'-pyrrolidine] -2',5'-dione (5al & 5al')**

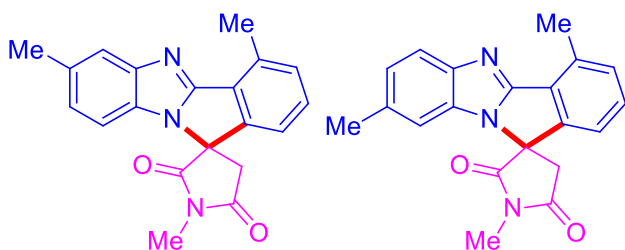

Inseparable mixture; Pale yellow solid, 50 mg, 67%; mp 232-234 °C; <sup>1</sup>H NMR (400 MHz, CDCl<sub>3</sub>) δ 7.80, 7.78, 7.71, 7.39, 7.37, 7.17, 7.16, 7.15, 7.15, 7.15, 7.14, 7.12, 7.10, 7.08, 6.98, 6.96, 6.85, 3.57, 3.54, 3.53, 3.50, 3.38, 3.37, 3.33, 3.32, 3.29, 3.27, 2.89, 2.49, 2.47; <sup>13</sup>C NMR (100 MHz, CDCl<sub>3</sub>): δ 173.0, 172.9, 158.2, 157.7, 147.2, 146.5, 135.8, 133.9, 132.7, 131.9, 130.3, 130.2,

127.5, 125.0, 124.5, 121.5, 121.0, 118.5, 118.4, 108.1, 107.6, 65.9, 39.1, 26.1, 21.8, 21.6, 18.8; HRMS (ESI,  $m/z$ ) calculated for  $C_{20}H_{18}N_3O_4$  ( $M + H$ )<sup>+</sup> 332.1399, found 332.1397.

**2,7,10-trimethyl-3a,13a-dihydro-1H-benzo[4,5]imidazo[2,1-a]pyrrolo[3,4-c]isoquinoline-1,3(2H)-dione (3al)**

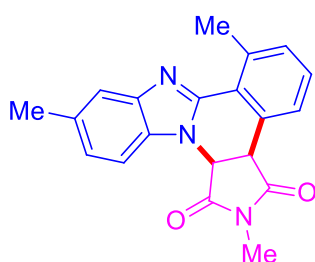

Yellow solid, 10 mg, 13%; <sup>1</sup>H NMR (400 MHz, CDCl<sub>3</sub>) δ 7.75 (d,  $J$  = 7.1 Hz, 1H), 7.50 (d,  $J$  = 8.0 Hz, 1H), 7.38 – 7.31 (m, 2H), 7.27 (d,  $J$  = 9.9 Hz, 1H), 7.12 (d,  $J$  = 7.3 Hz, 1H), 5.61 (d,  $J$  = 9.0 Hz, 1H), 4.61 (d,  $J$  = 8.9 Hz, 1H), 3.03 (d,  $J$  = 3.5 Hz, 6H), 2.71 (s, 3H); <sup>13</sup>C NMR (100 MHz, CDCl<sub>3</sub>): δ 174.4, 172.5, 144.9, 139.7, 135.6,

133.7, 132.6, 130.1, 129.8, 127.4, 125.7, 123.9, 123.7, 107.8, 53.2, 42.4, 25.6, 23.8, 16.6;

HRMS (ESI,  $m/z$ ) calculated for  $C_{20}H_{18}N_3O_4$  ( $M + H$ )<sup>+</sup> 332.1399, found 332.1396.

**7-chloro-1',4-dimethylspiro[benzo[4,5]imidazo[2,1-a]isoindole-11,3'-pyrrolidine]-2',5'-dione & 8-chloro-1',4-dimethylspiro [benzo[4,5]imidazo[2,1-a]isoindole-11,3'-pyrrolidine]-2',5'-dione (5am & 5am')**

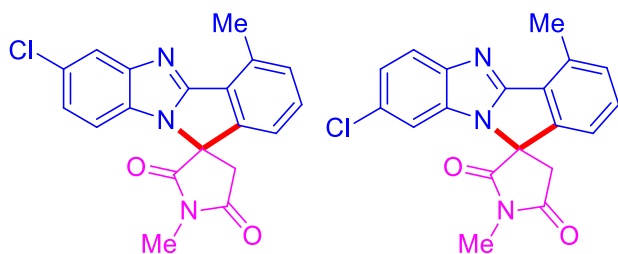

Inseparable mixture; Pale yellow solid, 50 mg, 69%; mp 239-241 °C; <sup>1</sup>H NMR (400 MHz, CDCl<sub>3</sub>) δ 7.93 – 7.82 (m, 1H), 7.46 – 7.38 (m, 2H), 7.32 – 7.26 (m, 1H), 7.18 (d,  $J$  = 7.2 Hz, 1H), 7.09 – 6.98 (m,

1H), 3.52 (dd,  $J$  = 18.7, 6.8 Hz, 1H), 3.37 (dd,  $J$  = 18.6, 5.1 Hz, 1H), 3.29 (d,  $J$  = 8.3 Hz, 3H), 2.90 (s, 3H); <sup>13</sup>C NMR (100 MHz, CDCl<sub>3</sub>): δ 172.5, 172.4, 159.5, 158.9, 150.0, 147.8, 146.5, 136.3, 136.2, 132.1, 132.1, 130.8, 130.8, 130.6, 129.3, 128.7, 128.6, 126.9, 126.8, 123.9, 123.6, 122.2, 121.4, 118.5, 118.5, 108.7, 108.3, 66.1, 66.1, 39.2, 39.1, 26.2, 26.2, 18.8; HRMS (ESI,  $m/z$ ) calculated for  $C_{19}H_{15}N_3O_2$  ( $M + H$ )<sup>+</sup> 352.0853, found 352.0847.

**10-chloro-2,7-dimethyl-3a,13a-dihydro-1H-benzo[4,5]imidazo[2,1-a]pyrrolo[3,4-c]isoquinoline-1,3(2H)-dione (3am)**

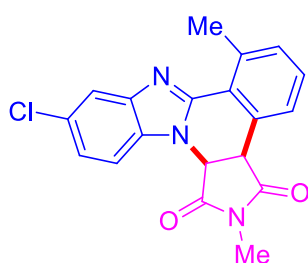

White solid, 6 mg, 9%; <sup>1</sup>H NMR (400 MHz, CDCl<sub>3</sub>): δ 7.77 (d,  $J$  = 7.7 Hz, 1H), 7.72 (d,  $J$  = 8.6 Hz, 1H), 7.69 (d,  $J$  = 1.9 Hz, 1H),

7.37 (t,  $J = 7.6$  Hz, 1H), 7.32 (d,  $J = 7.5$  Hz, 1H), 7.29 – 7.26 (m, 1H), 5.54 (d,  $J = 9.6$  Hz, 1H), 4.65 (d,  $J = 9.5$  Hz, 1H), 3.05 (s, 3H), 2.97 (s, 3H);  $^{13}\text{C}$  NMR (100 MHz,  $\text{CDCl}_3$ ):  $\delta$  174.1, 172.3, 146.3, 139.7, 134.5, 132.7, 130.5, 129.9, 127.6, 126.1, 124.3, 120.5, 111.1, 53.2, 42.3, 25.7, 24.1; HRMS (ESI,  $m/z$ ) calculated for  $\text{C}_{19}\text{H}_{15}\text{N}_3\text{O}_2$  ( $\text{M} + \text{H}$ ) $^+$  352.0853, found 352.0842.

**4-methyl-1'-phenylspiro[benzo[4,5]imidazo[2,1-a]isoindole-11,3'-pyrrolidine]-2',5'-dione (5an)**

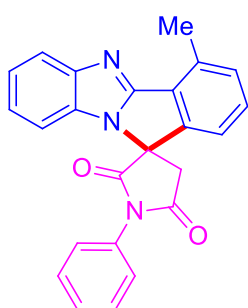

Pale yellow solid, 38 mg, 42%; mp 210-212 °C;  $^1\text{H}$  NMR (600 MHz,  $\text{CDCl}_3$ ):  $\delta$  7.99 (d,  $J = 7.4$  Hz, 1H), 7.54 (t,  $J = 7.6$  Hz, 2H), 7.47 (t,  $J = 7.7$  Hz, 2H), 7.43 (d,  $J = 6.9$  Hz, 3H), 7.37 - 7.33 (m, 3H), 7.25 (s, 1H), 3.73 (d,  $J = 18.2$  Hz, 1H), 3.53 (d,  $J = 18.1$  Hz, 1H), 2.95 (s, 3H);  $^{13}\text{C}$  NMR (151 MHz,  $\text{CDCl}_3$ ):  $\delta$  171.5, 146.6, 136.4, 132.2, 131.2, 130.8, 129.5, 129.4, 129.3, 126.3, 126.1, 124.1, 123.3, 121.5, 118.5, 108.2, 66.2, 39.3, 19.1; HRMS (ESI,  $m/z$ ) calculated for  $\text{C}_{24}\text{H}_{18}\text{N}_3\text{O}_2$  ( $\text{M} + \text{H}$ ) $^+$  379.1321, found 380.1395.

**7-methyl-2-phenyl-3a,13a-dihydro-1H-benzo[4,5]imidazo[2,1-a]pyrrolo[3,4-c]isoquinoline-1,3(2H)-dione (3an)**

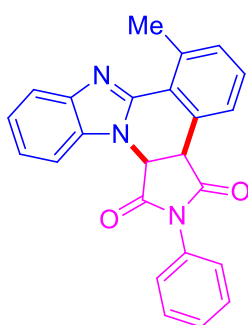

White solid, 26 mg, 29%;  $^1\text{H}$  NMR (400 MHz,  $\text{CDCl}_3$ ):  $\delta$  7.88 (d,  $J = 7.9$  Hz, 1H), 7.82 (d,  $J = 7.5$  Hz, 1H), 7.68 (d,  $J = 7.9$  Hz, 1H), 7.45 – 7.29 (m, 8H), 7.25 (d,  $J = 2.0$  Hz, 1H), 5.87 (d,  $J = 9.6$  Hz, 1H), 4.80 (d,  $J = 9.6$  Hz, 1H), 3.03 (s, 3H);  $^{13}\text{C}$  NMR (100 MHz,  $\text{CDCl}_3$ ):  $\delta$  173.1, 171.3, 145.9, 143.7, 139.8, 134.9, 134.2, 132.9, 130.0, 129.4, 127.2, 126.9, 125.6, 124.0, 123.3, 123.2, 120.3, 110.2, 53.3, 42.6, 24.0; HRMS (ESI,  $m/z$ ) calculated for  $\text{C}_{24}\text{H}_{18}\text{N}_3\text{O}_2$  ( $\text{M} + \text{H}$ ) $^+$  379.1321, found 380.1392.

**4-ethyl-1'-phenylspiro[benzo[4,5]imidazo[2,1-a]isoindole-11,3'-pyrrolidine]-2',5'-dione (5ao)**

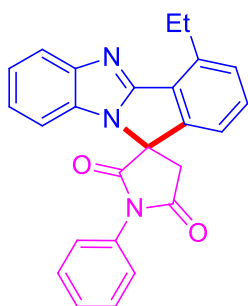

Red solid, 49 mg, 55%; mp 141-143 °C;  $^1\text{H}$  NMR (600 MHz,  $\text{CDCl}_3$ ):  $\delta$  7.96 (d,  $J = 7.7$  Hz, 1H), 7.52 (t,  $J = 7.7$  Hz, 2H), 7.49 - 7.42 (m, 5H), 7.35 - 7.29 (m, 3H), 7.25 (d,  $J = 7.8$  Hz, 1H), 3.69 (d,  $J = 18.7$  Hz, 1H), 3.49 (d,  $J = 18.7$  Hz, 1H), 3.37 (hept,  $J = 7.3$  Hz, 2H), 1.45 (t,  $J = 7.6$  Hz, 3H);  $^{13}\text{C}$  NMR (150 MHz,  $\text{CDCl}_3$ ):  $\delta$  171.8, 171.7, 157.9, 149.2, 146.6, 142.4, 134.2, 131.3, 130.8, 130.2, 129.5, 129.4, 126.8, 126.2, 123.8, 122.9, 121.6, 118.6, 108.1, 66.0, 39.2, 25.6, 14.4; HRMS (ESI,  $m/z$ ) calculated for  $\text{C}_{25}\text{H}_{20}\text{N}_3\text{O}_2$  ( $\text{M} + \text{H}$ ) $^+$  394.1556, found 394.1563.

**7-ethyl-2-phenyl-3a,13a-dihydro-1H-benzo[4,5]imidazo[2,1-a]pyrrolo[3,4-c]isoquinolin e-1,3(2H)-dione (3ao)**

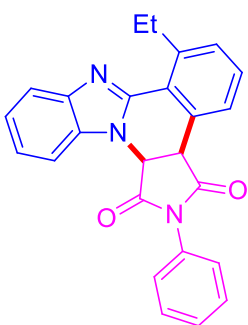

Pale yellow solid, 14 mg, 16%;  $^1\text{H}$  NMR (400 MHz,  $\text{CDCl}_3$ ):  $\delta$  7.85 (d,  $J = 9.0$  Hz, 1H), 7.79 (d,  $J = 6.5$  Hz, 1H), 7.66 (d,  $J = 7.0$  Hz, 1H), 7.47 - 7.26 (m, 9H), 5.74 (d,  $J = 9.6$  Hz, 1H), 4.74 (d,  $J = 9.5$  Hz, 1H), 3.66 - 3.57 (m, 2H), 1.37 (t,  $J = 7.4$  Hz, 3H);  $^{13}\text{C}$  NMR (100 MHz,  $\text{CDCl}_3$ ):  $\delta$  171.8, 171.7, 158.0, 149.2, 146.6, 142.4, 131.3, 130.8, 130.2, 129.5, 129.4, 126.8, 126.2, 123.8, 123.0, 121.6, 118.6, 108.1, 66.02, 39.24, 25.62, 14.43; HRMS (ESI,  $m/z$ ) calculated for  $\text{C}_{25}\text{H}_{20}\text{N}_3\text{O}_2$  ( $\text{M} + \text{H}$ ) $^+$  394.1556, found 394.1551.

**1',4-diphenylspiro[benzo[4,5]imidazo[2,1-a]isoindole-11,3'-pyrrolidine]-2',5'-dione (5ap)**

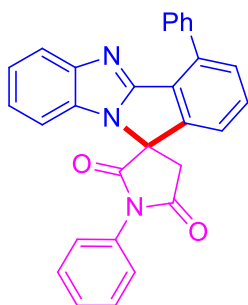

Pink solid, 29 mg, 36%; mp 144-146 °C;  $^1\text{H}$  NMR (600 MHz,  $\text{CDCl}_3$ ):  $\delta$  7.90 - 7.86 (m, 2H), 7.85 - 7.82 (m, 1H), 7.61 (q,  $J = 7.8$  Hz, 2H), 7.63 - 7.53 (m, 4H), 7.52 - 7.44 (m, 4H), 7.31 - 7.27 (m, 2H), 7.24 - 7.22 (m, 1H), 3.75 (d,  $J = 18.7$  Hz, 1H), 3.58 (d,  $J = 18.7$  Hz, 1H);  $^{13}\text{C}$  NMR (100 MHz,  $\text{CDCl}_3$ ):  $\delta$  171.8, 171.7, 157.3, 148.9, 147.5, 139.6, 137.2, 132.3, 131.3, 130.7, 130.2, 129.5, 129.5, 129.4, 128.8, 128.4, 126.1, 126.1, 123.9, 122.9, 122.1, 119.9, 107.9, 65.7, 39.4; HRMS (ESI,  $m/z$ ) calculated for  $\text{C}_{29}\text{H}_{20}\text{N}_3\text{O}_2$  ( $\text{M} + \text{H}$ ) $^+$  442.1556, found 442.1559.

**2,7-diphenyl-3a,13a-dihydro-1H-benzo[4,5]imidazo[2,1-a]pyrrolo[3,4-c]isoquinoline-1,3(2H)-dione (3ap)**

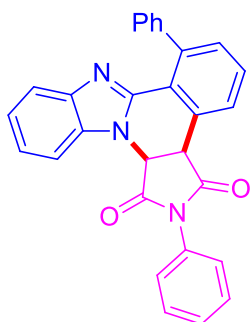

Off-white solid, 24 mg, 30%;  $^1\text{H}$  NMR (400 MHz,  $\text{CDCl}_3$ ):  $\delta$  7.93 (d,  $J = 7.8$  Hz, 1H), 7.57 (d,  $J = 8.2$  Hz, 1H), 7.52 (d,  $J = 7.7$  Hz, 1H), 7.49 (d,  $J = 3.2$  Hz, 1H), 7.46 (s, 1H), 7.43 (d,  $J = 7.6$  Hz, 2H), 7.40 (d,  $J = 5.8$  Hz, 6H), 7.29 (d,  $J = 7.4$  Hz, 2H), 7.24 (d,  $J = 7.6$  Hz, 1H), 7.16 (t,  $J = 7.6$  Hz, 1H), 5.84 (d,  $J = 9.2$  Hz, 1H), 4.73 (d,  $J = 9.1$  Hz, 1H);  $^{13}\text{C}$  NMR (100 MHz,  $\text{CDCl}_3$ ):  $\delta$  173.2, 171.7, 144.7, 142.7, 141.6, 134.3, 132.9, 131.0, 130.2, 129.4, 129.3, 129.2, 129.1, 128.3, 127.9, 127.4, 127.1, 126.3, 126.1, 125.9, 123.9, 123.2, 120.3, 110.1, 53.4, 42.8 ; HRMS (ESI,  $m/z$ ) calculated for  $\text{C}_{29}\text{H}_{20}\text{N}_3\text{O}_2$  ( $\text{M} + \text{H}$ ) $^+$  442.1556, found 442.1552.

**1'-(4-chlorophenyl)-4-methylspiro[benzo[4,5]imidazo[2,1-a]isoindole-11,3'-pyrrolidine]-2',5'-dione (5aq)**

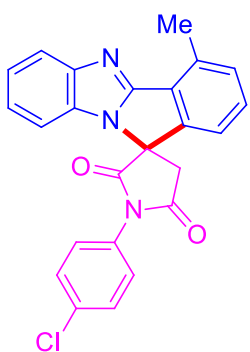

Off-white solid, 32 mg, 32%; mp 204-206 °C;  $^1\text{H}$  NMR (400 MHz,  $\text{CDCl}_3$ ):  $\delta$  7.99 (d,  $J = 6.7$  Hz, 1H), 7.50 (d,  $J = 8.7$  Hz, 2H), 7.47 – 7.42 (m, 2H), 7.40 (d,  $J = 8.8$  Hz, 2H), 7.37 – 7.28 (m, 3H), 7.22 (d,  $J = 8.6$  Hz, 1H), 3.72 (d,  $J = 18.7$  Hz, 1H), 3.52 (d,  $J = 18.7$  Hz, 1H), 2.94 (s, 3H);  $^{13}\text{C}$  NMR (100 MHz,  $\text{CDCl}_3$ ):  $\delta$  171.4, 171.2, 157.8, 146.4, 136.4, 135.3, 132.3, 130.8, 129.9, 129.7, 129.6, 127.3, 127.1, 124.1, 123.3, 121.5, 118.5, 108.1, 66.2, 39.1, 19.0; HRMS (ESI,  $m/z$ ) calculated for  $\text{C}_{24}\text{H}_{17}\text{ClN}_3\text{O}_2$  ( $\text{M} + \text{H}$ ) $^+$  414.1009, found 414.1010.

**2-(4-chlorophenyl)-7-methyl-3a,13a-dihydro-1H-benzo[4,5]imidazo[2,1-a]pyrrolo[3,4-c]isoquinoline-1,3(2H)-dione(3aq)**

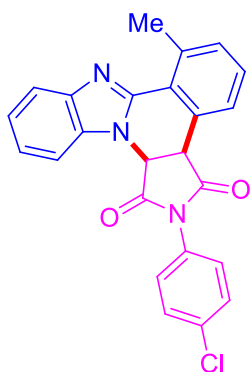

Pale red solid, 48 mg, 48%;  $^1\text{H}$  NMR (400 MHz,  $\text{CDCl}_3$ ):  $\delta$  7.86 (d,  $J = 8.9$  Hz, 1H), 7.78 (d,  $J = 6.8$  Hz, 1H), 7.65 (d,  $J = 7.0$  Hz, 1H), 7.43 – 7.30 (m, 6H), 7.23 (s, 2H), 5.75 (d,  $J = 9.5$  Hz, 1H), 4.77 (d,  $J = 9.4$  Hz, 1H), 3.03 (s, 3H);  $^{13}\text{C}$  NMR (100 MHz,  $\text{CDCl}_3$ ):  $\delta$  173.3, 171.5, 145.9, 145.4, 134.2, 131.1, 131.0, 130.4, 129.2, 129.0, 127.4, 125.9, 125.6, 123.9, 123.3, 122.5, 120.1, 110.3, 53.3, 42.7, 28.4, 15.1; HRMS (ESI,  $m/z$ ) calculated for  $\text{C}_{24}\text{H}_{17}\text{ClN}_3\text{O}_2$  ( $\text{M} + \text{H}$ ) $^+$  414.1009, found 414.0997.



**1'-(4-methoxybenzyl)-4-methylspiro[benzo[4,5]imidazo[2,1-a]isoindole-11,3'-pyrrolidine]-2',5'-dione (5ar)**

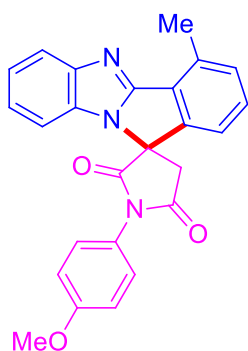

Off-White Solid, 57 mg, 58%; mp 206-208 °C;  $^1\text{H}$  NMR (400 MHz,  $\text{CDCl}_3$ ):  $\delta$  8.06 (t,  $J = 5.1$  Hz, 1H), 7.51 – 7.43 (m, 2H), 7.41 – 7.27 (m, 6H), 7.04 – 6.99 (m, 2H), 3.83 (s, 3H), 3.72 (d,  $J = 18.0$  Hz, 1H), 3.52 (d,  $J = 17.7$  Hz, 1H), 2.97 (s, 3H);  $^{13}\text{C}$  NMR (101 MHz,  $\text{CDCl}_3$ ):  $\delta$  171.6, 171.3, 160.1, 146.7, 136.8, 132.4, 131.5, 129.4, 127.3, 126.2, 124.6, 123.9, 123.6, 120.9, 118.6, 114.8, 108.4, 66.6, 55.6, 38.9, 19.4; HRMS (ESI,  $m/z$ ) calculated for  $\text{C}_{25}\text{H}_{20}\text{N}_3\text{O}_3$  ( $\text{M} + \text{H}$ ) $^+$  410.1505, found 410.1502.

**2-(4-methoxyphenyl)-7-methyl-3a,13a-dihydro-1H-benzo[4,5]imidazo[2,1-a]pyrrolo[3,4-c]isoquinoline-1,3(2H)-dione (3ar)**

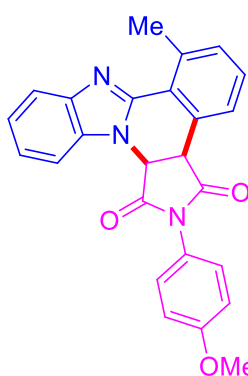

Pale Yellow solid, 23 mg, 23%;  $^1\text{H}$  NMR (400 MHz,  $\text{CDCl}_3$ ):  $\delta$  7.87 – 7.83 (m, 1H), 7.79 (d,  $J = 6.8$  Hz, 1H), 7.69 – 7.64 (m, 1H), 7.38 – 7.31 (m, 4H), 7.16 (d,  $J = 9.0$  Hz, 2H), 6.92 (d,  $J = 9.0$  Hz, 2H), 5.73 (d,  $J = 9.6$  Hz, 1H), 4.74 (d,  $J = 9.6$  Hz, 1H), 3.79 (s, 3H), 3.03 (s, 3H);  $^{13}\text{C}$  NMR (100 MHz,  $\text{CDCl}_3$ ):  $\delta$  173.6, 171.8, 159.8, 146.1, 143.9, 139.7, 134.3, 132.7, 129.9, 127.3, 127.2, 125.6, 123.9, 123.6,

123.3, 123.2, 120.3, 114.5, 110.2, 55.5, 53.2, 42.5, 24.0; HRMS (ESI,  $m/z$ ) calculated for  $\text{C}_{26}\text{H}_{22}\text{N}_3\text{O}_3$  ( $\text{M} + \text{H}$ ) $^+$  410.1505, found 410.1496.

**1'-(4-chlorophenyl)-4-ethylspiro[benzo[4,5]imidazo[2,1-a]isoindole-11,3'-pyrrolidine]-2',5'-dione (5as)**

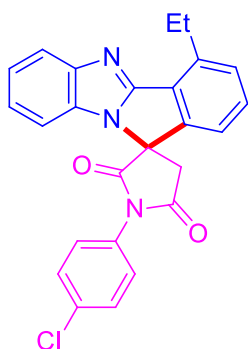

Pale Yellow solid, 63 mg, 65%;  $^1\text{H}$  NMR (400 MHz,  $\text{CDCl}_3$ ):  $\delta$  7.98 (d,  $J = 8.9$  Hz, 1H), 7.49 (d,  $J = 8.8$  Hz, 3H), 7.44 – 7.37 (m, 3H), 7.34 (d,  $J = 7.2$  Hz, 1H), 7.29 (s, 1H), 7.22 (d,  $J = 8.8$  Hz, 1H), 6.83 (s, 1H), 3.71 (d,  $J = 18.7$  Hz, 1H), 3.50 (d,  $J = 18.7$  Hz, 1H), 3.39-3.36 (m, 2H), 1.45 (t,  $J = 7.6$  Hz, 3H);  $^{13}\text{C}$  NMR (101 MHz,  $\text{CDCl}_3$ ):  $\delta$  171.7, 171.6, 157.8,

148.8, 146.6, 142.5, 134.2, 131.3, 130.9, 130.2, 130.1, 129.5, 129.4, 129.1, 126.6, 126.1, 123.9, 123.1, 121.5, 118.6, 108.2, 66.1, 39.2, 25.7, 14.4; HRMS (ESI,  $m/z$ ) calculated for  $C_{25}H_{20}N_3O_3$  ( $M + H$ )<sup>+</sup> 428.1166, found 428.1158.

**2-(4-chlorophenyl)-7-ethyl-3a,13a-dihydro-1H-benzo[4,5]imidazo[2,1-a]pyrrolo[3,4-c]isoquinoline-1,3(2H)-dione (3as)**

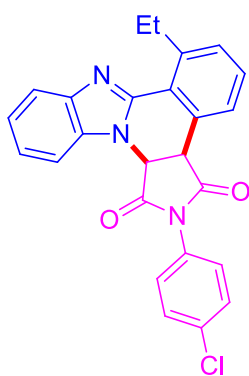

Off-White Solid, 11 mg, 12%; <sup>1</sup>H NMR (400 MHz, CDCl<sub>3</sub>): δ 7.85 (d,  $J$  = 9.0 Hz, 1H), 7.80 – 7.76 (m, 1H), 7.66 (d,  $J$  = 6.8 Hz, 1H), 7.45 – 7.38 (m, 4H), 7.37 – 7.30 (m, 2H), 7.25 (d,  $J$  = 3.8 Hz, 2H), 5.79 (d,  $J$  = 9.4 Hz, 1H), 4.78 (d,  $J$  = 9.4 Hz, 1H), 3.67-3.55 (m, 2H), 1.36 (t,  $J$  = 7.4 Hz, 3H); <sup>13</sup>C NMR (101 MHz, CDCl<sub>3</sub>): δ 173.1, 171.3, 146.1, 145.4, 134.9, 134.2, 131.2, 130.3, 129.5, 129.4, 127.2, 127.1, 125.6, 123.9,

123.3, 122.7, 120.3, 110.1, 53.3, 42.7, 28.4, 15.1; HRMS (ESI,  $m/z$ ) calculated for  $C_{25}H_{20}N_3O_3$  ( $M + H$ )<sup>+</sup> 428.1166, found 428.1160.

**4-ethyl-1'-(4-methoxyphenyl)spiro[benzo[4,5]imidazo[2,1-a]isoindole-11,3'-pyrrolidine]-2',5'-dione (5at)**

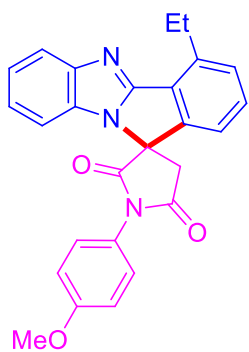

Pale Yellow solid, 66 mg, 69%; <sup>1</sup>H NMR (400 MHz, CDCl<sub>3</sub>): δ 7.98 (d,  $J$  = 8.4 Hz, 1H), 7.53 – 7.45 (m, 2H), 7.34 (d,  $J$  = 8.8 Hz, 5H), 7.23 (d,  $J$  = 8.8 Hz, 1H), 7.03 (d,  $J$  = 8.7 Hz, 2H), 3.84 (s, 3H), 3.71 (d,  $J$  = 18.6 Hz, 1H), 3.51 (d,  $J$  = 18.6 Hz, 1H), 3.40 - 3.37 (m, 2H), 1.46 (t,  $J$  = 7.5 Hz, 3H); <sup>13</sup>C NMR (100 MHz, CDCl<sub>3</sub>): δ 171.9, 171.8, 160.0, 157.6, 146.7, 142.6, 134.1, 131.0, 130.2, 129.9, 127.6, 127.4, 123.9, 123.8,

123.2, 121.5, 118.6, 114.7, 114.5, 108.2, 66.1, 55.6, 39.2, 25.7, 14.5; HRMS (ESI,  $m/z$ ) calculated for  $C_{26}H_{22}N_3O_3$  ( $M + H$ )<sup>+</sup> 424.1661, found 424.1657.

**7-ethyl-2-(4-methoxyphenyl)-3a,13a-dihydro-1H-benzo[4,5]imidazo[2,1-a]pyrrolo[3,4-c]isoquinoline-1,3(2H)-dione (3at)**

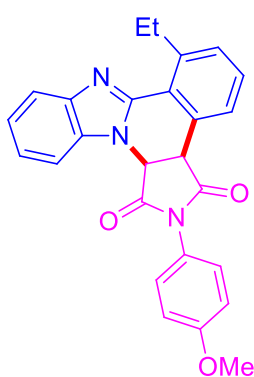

Pale Yellow solid, 9 mg, 11%;  $^1\text{H NMR}$  (400 MHz,  $\text{CDCl}_3$ ):  $\delta$  7.85 (d,  $J = 8.8$  Hz, 1H), 7.79 (d,  $J = 6.3$  Hz, 1H), 7.67 (d,  $J = 7.1$  Hz, 1H), 7.41 (d,  $J = 6.7$  Hz, 2H), 7.36 – 7.28 (m, 2H), 7.17 (d,  $J = 8.9$  Hz, 2H), 6.92 (d,  $J = 9.0$  Hz, 2H), 5.76 (d,  $J = 9.6$  Hz, 1H), 4.73 (d,  $J = 9.6$  Hz, 1H), 3.79 (s, 3H), 3.79 - 3.57 (m, 2H), 1.36 (t,  $J = 7.4$  Hz, 3H);  $^{13}\text{C NMR}$  (100 MHz,  $\text{CDCl}_3$ ):  $\delta$  173.5, 171.7, 159.8, 145.9,

133.9, 130.9, 130.6, 127.7, 127.3, 125.7, 124.1, 123.5, 119.7, 114.5, 110.6, 55.5, 53.3, 42.6, 28.4, 14.9 ; HRMS (ESI,  $m/z$ ) calculated for  $\text{C}_{26}\text{H}_{22}\text{N}_3\text{O}_3$  ( $\text{M} + \text{H}$ ) $^+$  424.1661, found 424.1663.

**1'-(4-methoxyphenyl)-4-phenylspiro[benzo[4,5]imidazo[2,1-a]isoindole-11,3'-pyrrolidine]-2',5'-dione (5au)**

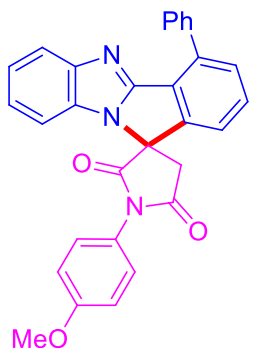

Off-White Solid, 38 mg, 44%;  $^1\text{H NMR}$  (400 MHz,  $\text{CDCl}_3$ ):  $\delta$  7.89 – 7.81 (m, 3H), 7.62 – 7.44 (m, 6H), 7.38 – 7.34 (m, 2H), 7.32 – 7.26 (m, 2H), 7.24 – 7.21 (m, 1H), 7.06 – 7.01 (m, 2H), 3.84 (s, 3H), 3.71 (d,  $J = 18.7$  Hz, 1H), 3.55 (d,  $J = 18.7$  Hz, 1H);  $^{13}\text{C NMR}$  (101 MHz,  $\text{CDCl}_3$ ):  $\delta$  171.9, 171.9, 160.0, 157.2, 148.7, 147.5, 139.6, 137.2, 132.2, 130.7, 130.2, 129.5, 128.8, 128.4, 127.4, 125.9, 123.9, 123.8, 122.9, 122.1,

119.9, 114.7, 107.9, 65.7, 55.6, 39.3; HRMS (ESI,  $m/z$ ) calculated for  $\text{C}_{25}\text{H}_{20}\text{N}_3\text{O}_3$  ( $\text{M} + \text{H}$ ) $^+$  472.1661, found 472.1655.

**2-(4-methoxyphenyl)-7-phenyl-3a,13a-dihydro-1H-benzo[4,5]imidazo[2,1-a]pyrrolo[3,4-c]isoquinoline-1,3(2H)-dione (3au)**

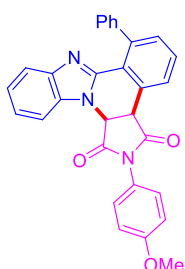

Pale Yellow Solid, 25 mg, 29%;  $^1\text{H NMR}$  (400 MHz,  $\text{CDCl}_3$ ):  $\delta$  7.96 – 7.93 (m, 1H), 7.61 (d,  $J = 8.0$  Hz, 1H), 7.55 – 7.47 (m, 3H), 7.39 (s, 6H), 7.20 (d,

$J = 8.8$  Hz, 3H), 7.13 (t,  $J = 7.6$  Hz, 1H), 6.94 (d,  $J = 8.9$  Hz, 2H), 5.96 (d,  $J = 9.2$  Hz, 1H), 4.76 (d,  $J = 9.1$  Hz, 1H), 3.80 (s, 3H);  $^{13}\text{C}$  NMR (101 MHz,  $\text{CDCl}_3$ ):  $\delta$  173.4, 171.8, 159.8, 144.5, 142.8, 141.3, 134.1, 132.9, 130.4, 129.4, 128.5, 128.0, 127.5, 127.3, 127.2, 124.1, 123.5, 123.3, 119.9, 114.5, 110.3, 55.5, 53.4, 42.7; HRMS (ESI,  $m/z$ ) calculated for  $\text{C}_{25}\text{H}_{20}\text{N}_3\text{O}_3$  ( $\text{M} + \text{H}$ ) $^+$  472.1661, found 472.1655.

**1'-(4-chlorophenyl)-4-phenylspiro[benzo[4,5]imidazo[2,1-a]isoindole-11,3'-pyrrolidine]-2',5'-dione (5av)**

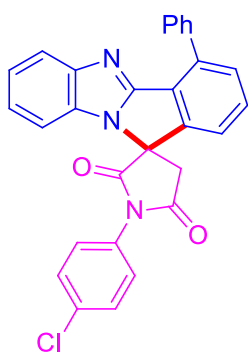

Off-White Solid, 34 mg, 39%;  $^1\text{H}$  NMR (400 MHz,  $\text{CDCl}_3$ ):  $\delta$  7.86 (d,  $J = 6.8$  Hz, 3H), 7.64 – 7.50 (m, 7H), 7.47 – 7.40 (m, 3H), 7.31–7.28 (m, 2H), 7.22 – 7.18 (m, 1H), 3.76 (d,  $J = 18.7$  Hz, 1H), 3.58 (d,  $J = 18.7$  Hz, 1H);  $^{13}\text{C}$  NMR (101 MHz,  $\text{CDCl}_3$ ):  $\delta$  170.9, 170.7, 155.7, 147.4, 140.6, 136.6, 135.5, 132.7, 131.9, 129.8, 129.5, 129.3, 129.2, 129.1, 127.3, 125.0, 124.3, 121.6, 119.9, 108.2, 66.4, 39.0; HRMS (ESI,  $m/z$ )

calculated for  $\text{C}_{25}\text{H}_{20}\text{N}_3\text{O}_3$  ( $\text{M} + \text{H}$ ) $^+$  476.1166, found 476.1161.

**1'-isobutyl-4-methylspiro[benzo[4,5]imidazo[2,1-a]isoindole-11,3'-pyrrolidine]-2',5'-dione (5aw)**

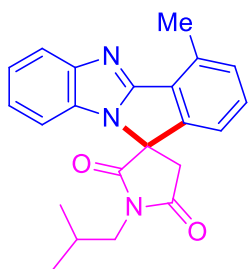

Pale Yellow Solid, 58 mg, 67%; mp 229–231 °C;  $^1\text{H}$  NMR (400 MHz,  $\text{CDCl}_3$ ):  $\delta$  7.93 (d,  $J = 5.8$  Hz, 1H), 7.39 (d,  $J = 6.9$  Hz, 2H), 7.33 – 7.25 (m, 2H), 7.16 (d,  $J = 5.4$  Hz, 1H), 7.11 (d,  $J = 6.6$  Hz, 1H), 3.60 – 3.52 (m, 3H), 3.34 (d,  $J = 17.8$  Hz, 1H), 2.90 (s, 3H), 2.23 – 2.15 (m, 1H),

0.99 (d,  $J = 6.7$  Hz, 6H);  $^{13}\text{C}$  NMR (100 MHz,  $\text{CDCl}_3$ ):  $\delta$  172.9, 158.2, 149.0, 146.9, 136.0, 131.9, 130.5, 130.1, 127.3, 123.7, 122.9, 121.5, 118.3, 108.1, 65.9, 47.3, 38.9, 27.4, 20.2, 20.2, 18.9; HRMS (ESI,  $m/z$ ) calculated for  $\text{C}_{22}\text{H}_{22}\text{N}_3\text{O}_2$  ( $\text{M} + \text{H}$ ) $^+$  360.1712, found 360.1707.

**2-isobutyl-7-methyl-3a,13a-dihydro-1H-benzo[4,5]imidazo[2,1-a]pyrrolo[3,4-c]isoquinoline-1,3(2H)-dione (3aw)**

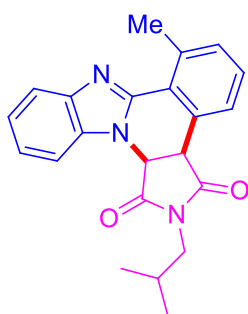

Red Solid, 15 mg, 17%;  $^1\text{H}$  NMR (400 MHz,  $\text{CDCl}_3$ ):  $\delta$  7.86 (d,  $J = 7.9$  Hz, 1H), 7.76 (d,  $J = 7.6$  Hz, 1H), 7.66 (d,  $J = 8.0$  Hz, 1H), 7.39 - 7.27 (m, 4H), 5.72 - 5.60 (m, 1H), 4.65 (d,  $J = 9.4$  Hz, 1H), 3.41 - 3.30 (m, 2H), 2.99 (s, 3H), 2.00 - 1.93 (m, 1H), 0.76 (d,  $J = 4.4$  Hz, 6H);  $^{13}\text{C}$  NMR (100 MHz,  $\text{CDCl}_3$ ):  $\delta$  174.5, 172.6, 139.6, 133.8, 132.6, 130.3, 127.8, 125.7, 124.1, 123.5, 119.6, 110.6, 53.0, 46.8, 42.4, 26.9, 24.0, 19.9, 19.8; HRMS (ESI,  $m/z$ ) calculated for  $\text{C}_{22}\text{H}_{22}\text{N}_3\text{O}_2$  ( $\text{M} + \text{H}$ ) $^+$  360.1712, found 360.1710.

**1'-(2-methoxyethyl)-4-methylspiro[benzo[4,5]imidazo[2,1-a]isoindole-11,3'-pyrrolidine]-2',5'-dione (5ax)**

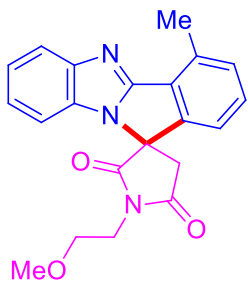

Pale yellow solid, 60 g, 69%; mp 139-141  $^\circ\text{C}$ ;  $^1\text{H}$  NMR (400 MHz,  $\text{CDCl}_3$ ):  $\delta$  7.92 (d,  $J = 8.3$  Hz, 1H), 7.39 (d,  $J = 8.4$  Hz, 2H), 7.30 (q,  $J = 8.6, 8.0$  Hz, 2H), 7.21 (t,  $J = 9.2$  Hz, 2H), 3.98 (q,  $J = 5.3$  Hz, 2H), 3.68 (s, 2H), 3.54 (d,  $J = 18.6$  Hz, 1H), 3.39 (s, 3H), 3.34 (d,  $J = 18.7$  Hz, 1H), 2.90 (s, 3H);  $^{13}\text{C}$  NMR (100 MHz,  $\text{CDCl}_3$ ):  $\delta$  174.4, 172.5, 146.0, 143.8, 139.5, 134.2, 132.5, 129.7, 127.4, 125.8, 123.8, 123.1, 120.2, 110.4, 68.1, 58.5, 52.9, 42.4, 38.9, 24.0; HRMS (ESI,  $m/z$ ) calculated for  $\text{C}_{21}\text{H}_{20}\text{N}_3\text{O}_3$  ( $\text{M} + \text{H}$ ) $^+$  362.1505, found 362.1501.

**2-(2-methoxyethyl)-7-methyl-3a,13a-dihydro-1H-benzo[4,5]imidazo[2,1-a]pyrrolo[3,4-c]isoquinoline-1,3(2H)-dione (3ax)**

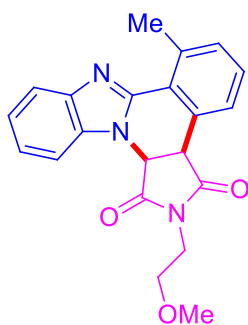

Pale yellow solid, 15 mg, 17%;  $^1\text{H}$  NMR (400 MHz,  $\text{CDCl}_3$ ):  $\delta$  7.83 (d,  $J = 8.1$  Hz, 1H), 7.75 (d,  $J = 7.5$  Hz, 1H), 7.66 (d,  $J = 7.7$  Hz, 1H), 7.38 - 7.29 (m, 4H), 5.58 (d,  $J = 9.6$  Hz, 1H), 4.62 (d,  $J = 9.6$  Hz, 1H), 3.76 - 3.70 (m, 2H), 3.53 (d,  $J = 5.5$  Hz, 2H), 3.22 (s, 3H), 3.00 (s, 3H);  $^{13}\text{C}$  NMR (100 MHz,  $\text{CDCl}_3$ ):  $\delta$  172.7, 172.7, 158.2, 149.1, 146.9, 135.9,

131.9, 130.4, 130.1, 127.3, 123.6, 122.9, 121.4, 118.7, 108.3, 67.8, 65.8, 58.6, 39.2, 29.7, 18.8; HRMS (ESI,  $m/z$ ) calculated for  $C_{21}H_{20}N_3O_3$  ( $M + H$ )<sup>+</sup> 362.1505, found 362.1499.

**1'-benzyl-4-methylspiro[benzo[4,5]imidazo[2,1-a]isoindole-11,3'-pyrrolidine]-2',5'-dione (5ay)**

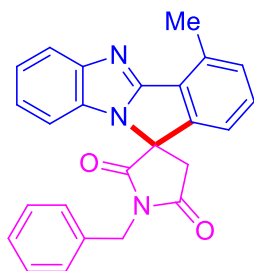

Off-white solid, 54 mg, 57%; mp 149-151 °C; <sup>1</sup>H NMR (400 MHz, CDCl<sub>3</sub>): δ 8.00 (d,  $J = 8.2$  Hz, 1H), 7.46 – 7.43 (m, 2H), 7.40 – 7.35 (m, 5H), 7.32 (d,  $J = 7.9$  Hz, 1H), 7.17 (t,  $J = 7.7$  Hz, 1H), 7.03 – 6.99 (m, 1H), 6.78 (d,  $J = 8.0$  Hz, 1H), 4.90 (s, 2H), 3.51 (d,  $J = 18.7$

Hz, 1H), 3.36 (d,  $J = 18.7$  Hz, 1H), 2.93 (s, 3H); <sup>13</sup>C NMR (100 MHz, CDCl<sub>3</sub>): δ 171.9, 146.6, 136.5, 134.9, 132.2, 131.2, 129.0, 129.0, 128.7, 124.3, 123.7, 120.8, 118.6, 108.4, 66.5, 43.9, 39.1, 19.3; HRMS (ESI,  $m/z$ ) calculated for  $C_{25}H_{20}N_3O_2$  ( $M + H$ )<sup>+</sup> 394.1556, found 394.1561.

**2-benzyl-7-methyl-3a,13a-dihydro-1H-benzo[4,5]imidazo[2,1-a]pyrrolo[3,4-c]isoquinoline-1,3(2H)-dione (3ay)**

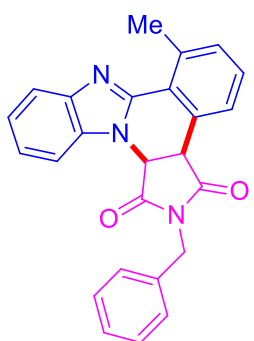

Pale yellow solid, 22 mg, 23%; <sup>1</sup>H NMR (400 MHz, CDCl<sub>3</sub>): δ 7.83 (d,  $J = 8.9$  Hz, 1H), 7.75 (d,  $J = 7.3$  Hz, 1H), 7.64 (d,  $J = 7.1$  Hz, 1H), 7.37 – 7.26 (m, 9H), 5.53 (d,  $J = 9.6$  Hz, 1H), 4.65 (s, 2H), 4.60 (d,  $J = 9.5$  Hz, 1H), 3.00 (s, 3H); <sup>13</sup>C NMR (100 MHz, CDCl<sub>3</sub>): δ 174.1, 172.2, 145.9, 143.7, 139.6, 134.7, 134.1, 132.6, 129.8, 128.9, 128.8, 128.7, 128.3, 127.9, 127.3, 125.8, 123.8, 123.2, 122.9, 120.1, 110.4, 52.9, 43.3,

42.3, 24.1; HRMS (ESI,  $m/z$ ) calculated for  $C_{25}H_{20}N_3O_2$  ( $M + H$ )<sup>+</sup> 394.1556, found 394.1547.

**1'-(4-methoxybenzyl)-4-methylspiro[benzo[4,5]imidazo[2,1-a]isoindole-11,3'-pyrrolidine]-2',5'-dione (5az)**

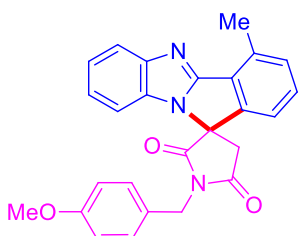

Pale Yellow solid, 71 mg, 70%; mp 85-87 °C; <sup>1</sup>H NMR (400 MHz, CDCl<sub>3</sub>): δ <sup>1</sup>H NMR (400 MHz, CDCl<sub>3</sub>) δ 7.88 (d,  $J = 8.1$  Hz, 1H),

7.35 – 7.27 (m, 4H), 7.23 (t,  $J = 7.1$  Hz, 1H), 7.09 (t,  $J = 7.7$  Hz, 1H), 6.95 (d,  $J = 8.5$  Hz, 1H), 6.83 (d,  $J = 8.6$  Hz, 2H), 6.73 (d,  $J = 8.0$  Hz, 1H), 4.79 – 4.75 (m, 2H), 3.75 (s, 3H), 3.41 (d,  $J = 18.7$  Hz, 1H), 3.26 (d,  $J = 18.7$  Hz, 1H), 2.85 (s, 3H);  $^{13}\text{C}$  NMR (100 MHz,  $\text{CDCl}_3$ ):  $\delta$  172.4, 172.3, 159.7, 157.8, 148.5, 146.5, 135.9, 131.9, 130.6, 130.5, 130.3, 129.9, 127.4, 127.1, 123.6, 122.9, 121.1, 118.7, 114.2, 114.0, 108.3, 66.1, 55.3, 43.1, 39.1, 18.9; HRMS (ESI,  $m/z$ ) calculated for  $\text{C}_{26}\text{H}_{22}\text{N}_3\text{O}_3$  ( $\text{M} + \text{H}$ ) $^+$  424.1661, found 424.1662.

**2-(4-methoxybenzyl)-7-methyl-3a,13a-dihydro-1H-benzo[4,5]imidazo[2,1-a]pyrrolo[3,4-c]isoquinoline-1,3(2H)-dione (3az)**

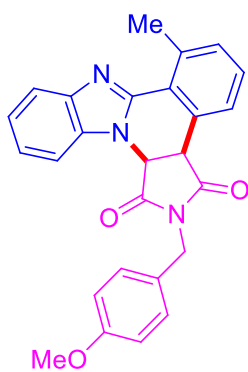

Pale Yellow solid, 14 mg, 14%;  $^1\text{H}$  NMR (400 MHz,  $\text{CDCl}_3$ ):  $\delta$  7.82 (d,  $J = 9.0$  Hz, 1H), 7.74 (d,  $J = 7.4$  Hz, 1H), 7.63 (d,  $J = 7.0$  Hz, 1H), 7.36 – 7.26 (m, 6H), 6.79 (d,  $J = 8.3$  Hz, 2H), 5.48 (d,  $J = 9.6$  Hz, 1H), 4.57 (d,  $J = 10.3$  Hz, 3H), 3.76 (s, 3H), 2.99 (s, 3H);  $^{13}\text{C}$  NMR (100 MHz,  $\text{CDCl}_3$ ):  $\delta$  174.1, 172.3, 159.6, 145.9, 143.8, 139.5, 134.2, 132.5, 130.5, 129.7, 127.3, 126.9, 125.8, 123.8, 123.1, 123.0, 120.2, 114.1, 110.4, 55.3, 52.9, 42.8, 42.3, 24.1; HRMS (ESI,  $m/z$ ) calculated for  $\text{C}_{26}\text{H}_{22}\text{N}_3\text{O}_3$  ( $\text{M} + \text{H}$ ) $^+$  424.1661, found 424.1651.

**4-methylspiro [benzo[4, 5] imidazo [2, 1-a] isoindole-11, 3'-pyrrolidine]-2',5'-dione (5bc)**

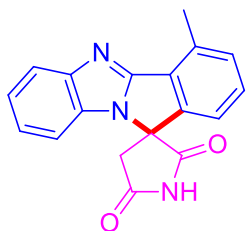

Pale yellow solid, 26 mg, 35%,  $^1\text{H}$  NMR (400 MHz,  $\text{DMSO}-d_6$ ); HRMS (ESI,  $m/z$ ) calculated for  $\text{C}_{18}\text{H}_{12}\text{N}_3\text{O}_2$  ( $\text{M} + \text{H}$ ) $^+$  304.1086, found 304.1082.

**7-methyl-3a, 13a-dihydro-1H-benzo [4, 5] imidazo [2, 1-a] pyrrolo [3, 4-c] isoquinoline-1, 3 (2H)-dione (3bc)**

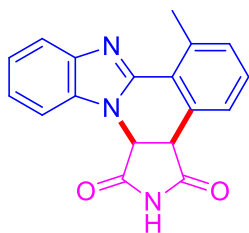

Pale yellow solid, 11 mg, 15%,  $^1\text{H}$  NMR (400 MHz,  $\text{DMSO-d}_6$ )  $\delta$  11.93 (s, 1H), 7.75 – 7.65 (m, 3H), 7.42 (t,  $J = 7.6$  Hz, 1H), 7.38 – 7.24 (m, 3H), 6.14 (d,  $J = 9.5$  Hz, 1H), 4.77 (d,  $J = 9.5$  Hz, 1H), 2.90 (s, 3H).  $^{13}\text{C}$  NMR (101 MHz,  $\text{DMSO-d}_6$ )  $\delta$  176.5, 175.5, 146.3, 143.5, 138.6, 134.7, 132.3, 130.2, 129.9, 125.9, 123.6, 123.0, 123.0, 119.8, 111.6, 53.9, 43.8, 24.1. HRMS (ESI,  $m/z$ ) calculated for  $\text{C}_{18}\text{H}_{12}\text{N}_3\text{O}_2$  ( $\text{M}+\text{H}$ ) $^+$  304.1086, found 304.1082.

**1', 9-dimethylspiro [imidazo [2, 1-a] isoindole-5, 3'-pyrrolidine]-2', 5'-dione (5bd)**

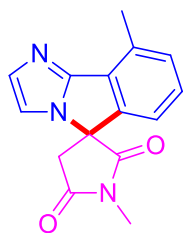

Pale yellow solid, 78 mg, 46%,  $^1\text{H}$  NMR (400 MHz,  $\text{Acetone-d}_6$ )  $\delta$  7.51 (d,  $J = 1.4$  Hz, 1H), 7.36 – 7.33 (m, 1H), 7.31 – 7.24 (m, 3H), 7.18 (d,  $J = 1.4$  Hz, 1H), 3.50 (d,  $J = 18.3$  Hz, 1H), 3.39 (d,  $J = 18.3$  Hz, 1H), 3.04 (s, 3H), 2.68 (s, 3H).  $^{13}\text{C}$  NMR (101 MHz,  $\text{Acetone-d}_6$ )  $\delta$  173.6, 172.9, 153.5, 146.4, 134.3, 132.3, 131.1, 128.4, 128.1, 119.3, 114.4, 66.8, 40.6, 25.2, 17.6. HRMS (ESI,  $m/z$ ) calculated for  $\text{C}_{15}\text{H}_{13}\text{N}_3\text{O}_2$  ( $\text{M}+\text{H}$ ) $^+$  268.1086, found 268.1081.

**6, 11-dimethyl-4aH-imidazo [2, 1-a] pyrrolo [3, 4-c] isoquinoline-5, 7 (6H, 7aH)-dione (3bd)**

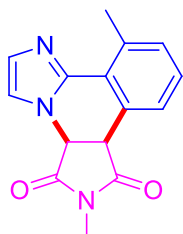

Pale yellow solid, 59 mg, 35%,  $^1\text{H}$  NMR (400 MHz,  $\text{DMSO-d}_6$ )  $\delta$  7.52 (d,  $J = 7.4$  Hz, 1H), 7.43 (d,  $J = 1.2$  Hz, 1H), 7.30 – 7.21 (m, 2H), 7.16 (d,  $J = 1.3$  Hz, 1H), 5.58 (d,  $J = 9.4$  Hz, 1H), 4.72 (d,  $J = 9.4$  Hz, 1H), 2.86 (s, 3H), 2.73 (s, 3H).  $^{13}\text{C}$  NMR (101 MHz,  $\text{DMSO-d}_6$ )  $\delta$  175.7, 174.0, 141.3, 135.9, 131.9, 129.8, 128.3, 127.4, 127.1, 123.2, 119.9, 54.2, 42.7, 25.7, 23.8. HRMS (ESI,  $m/z$ ) calculated for  $\text{C}_{15}\text{H}_{13}\text{N}_3\text{O}_2$  ( $\text{M}+\text{H}$ ) $^+$  268.1086, found 268.1080.



### 3-(2-(1H-benzo[d]imidazol-2-yl)phenyl)-1-methylpyrrolidine-2,5-dione (4a)

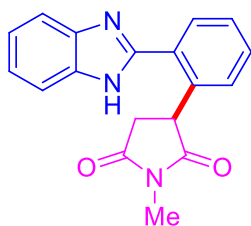

Yellow gummy mass,  $^1\text{H}$  NMR (400 MHz, acetone- $d_6$ ):  $\delta$  11.86 (s, 1H), 7.95 – 7.83 (m, 1H), 7.62 – 7.51 (m, 2H), 7.52 (s, 3H), 7.22 (p,  $J = 6.6$  Hz, 2H), 4.81 (dd,  $J = 9.4, 6.0$  Hz, 1H), 3.26 (dd,  $J = 17.5, 9.5$  Hz, 1H), 3.05 (dd,  $J = 17.5, 5.9$  Hz, 1H), 2.80 (s, 3H);  $^{13}\text{C}$  NMR (100 MHz, acetone- $d_6$ ):  $\delta$  178.19, 176.16, 137.50, 131.81, 129.83, 129.45, 127.85,

122.91, 121.76, 119.25, 111.18, 45.87, 37.98, 27.92, 24.15; HRMS (ESI,  $m/z$ ) calculated for  $\text{C}_{18}\text{H}_{16}\text{N}_3\text{O}_2$  (M) $^+$  306.1243, found 306.1237.

### 3-(2-(1H-benzo[d]imidazol-2-yl)-3-methylphenyl)-1-methylpyrrolidine-2,5-dione (6a)

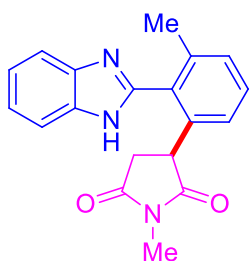

Pale yellow gummy mass,  $^1\text{H}$  NMR (600 MHz, DMSO- $d_6$ ):  $\delta$  8.27 (d,  $J = 6.5$  Hz, 1H), 7.91 (d,  $J = 7.9$  Hz, 1H), 7.82 (d,  $J = 7.9$  Hz, 1H), 7.68 (d,  $J = 7.7$  Hz, 1H), 7.58 (dt,  $J = 25.1, 7.1$  Hz, 2H), 7.27 (dd,  $J = 11.9, 7.6$  Hz, 1H), 5.93 (s, 1H), 4.28 (dd,  $J = 8.9, 6.9$  Hz, 1H), 2.94 (s, 3H), 2.73 (s, 3H), 2.43 – 2.36 (m, 1H), 2.02 (dd,  $J = 17.4, 6.8$  Hz, 1H;  $^{13}\text{C}$  NMR (150 MHz, DMSO- $d_6$ ):  $\delta$  176.24, 175.17, 172.20, 145.07, 143.70,

135.48, 131.66, 130.01, 127.91, 125.72, 124.79, 123.34, 119.42, 113.40, 55.97, 49.04, 31.44, 26.08, 25.10.

## KIE study

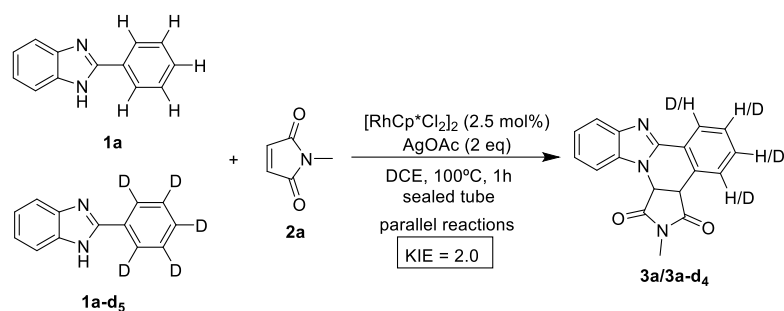

**Competitive reactions:** To an oven-dried sealed tube was added 2-phenyl benzimidazole **1a** (0.05 g, 0.258 mmol), **1a-d<sub>5</sub>** (0.05 g, 0.251 mmol), *N*-methylmaleimide **2a** (0.057 g, 0.52 mmol),  $[\text{RhCp}^*\text{Cl}_2]_2$  (3.9 mg, 0.006 mmol), AgOAc (0.085 g, 0.515 mmol) and 1,2-dichloroethane (3 mL). The reaction mixture was heated at 100 °C for 1 h. The reaction mixture was cooled down at room temperature and filtered through celite bed. The filtrate was concentrated under reduced pressure. The column chromatography (20% ethyl acetate/n-hexanes) purification afforded a mixture of **3a** and **3a-d<sub>4</sub>**. The KIE value was calculated from <sup>1</sup>H NMR spectrum ( $\text{K}_\text{H}/\text{K}_\text{D} = 1/(1.5-1) = 2.0$ ).

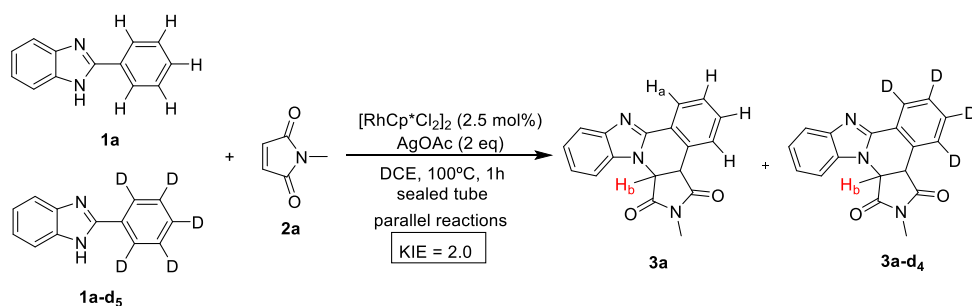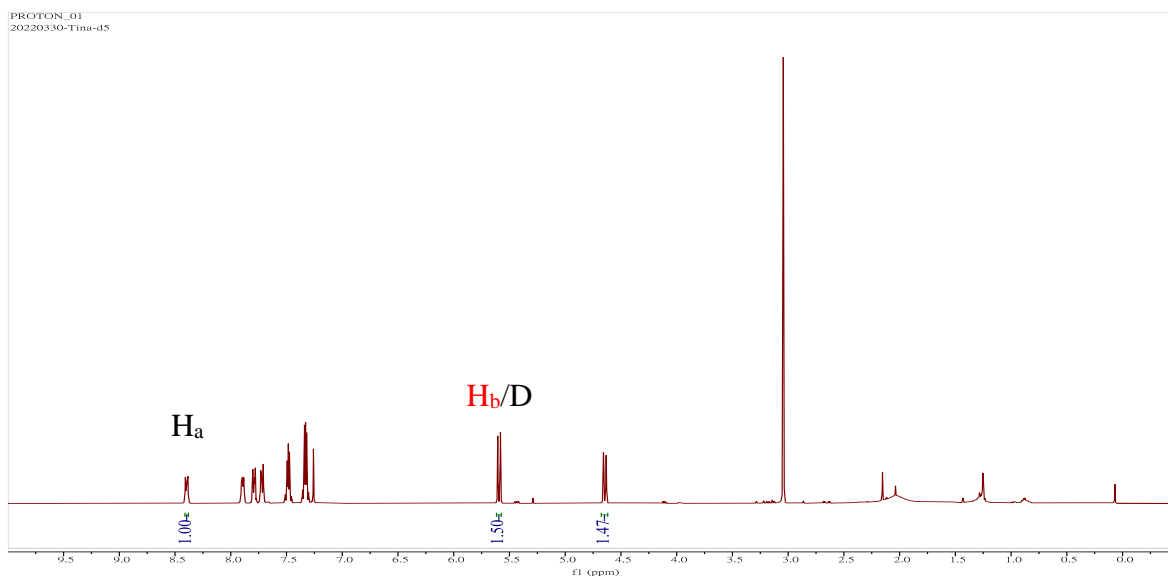

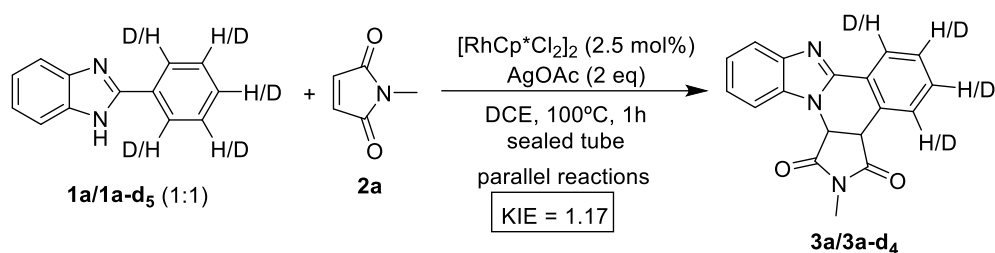

**Parallel reactions:** Two reactions were carried out. In the first oven-dried sealed tube 2-phenyl benzimidazole **1a** (0.05 g, 0.258 mmol) was added and in the second sealed tube **1a-d<sub>5</sub>** (0.05 g, 0.251 mmol) was added. After that *N*-methylmaleimide **2a** (0.057 g, 0.52 mmol),  $[\text{RhCp}^*\text{Cl}_2]_2$  (3.9 mg, 0.006 mmol), AgOAc (0.085 g, 0.515 mmol) and 1,2-dichloroethane (3 mL) were added in each of the sealed tube. The reaction mixture was heated at 100 °C for 1 h. The aliquots from both the reactions were taken at 10, 20, 30 and 40 min. and filtered through celite bed. The filtrate was concentrated *in vacuo*. The crude mixtures were analyzed by <sup>1</sup>H NMR spectroscopy.

| Deuterated |       |
|------------|-------|
| Time(min)  | Ratio |
| 10         | 0.07  |
| 20         | 0.11  |
| 30         | 0.16  |
| 40         | 0.19  |

| Non-deuterated |       |
|----------------|-------|
| Time(min)      | Ratio |
| 10             | 0.08  |
| 20             | 0.12  |
| 30             | 0.18  |
| 40             | 0.22  |

## KIE CALCULATION

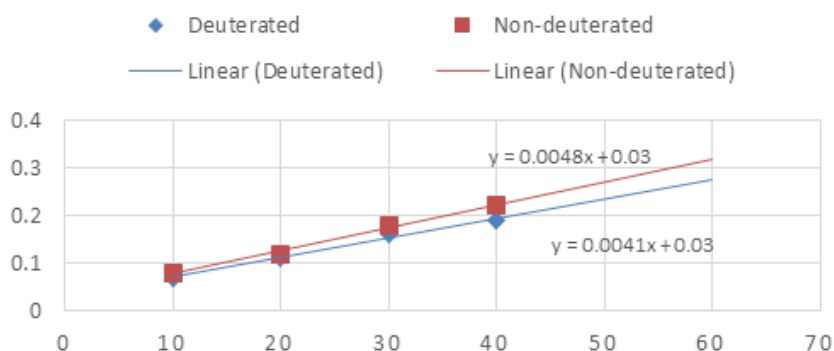

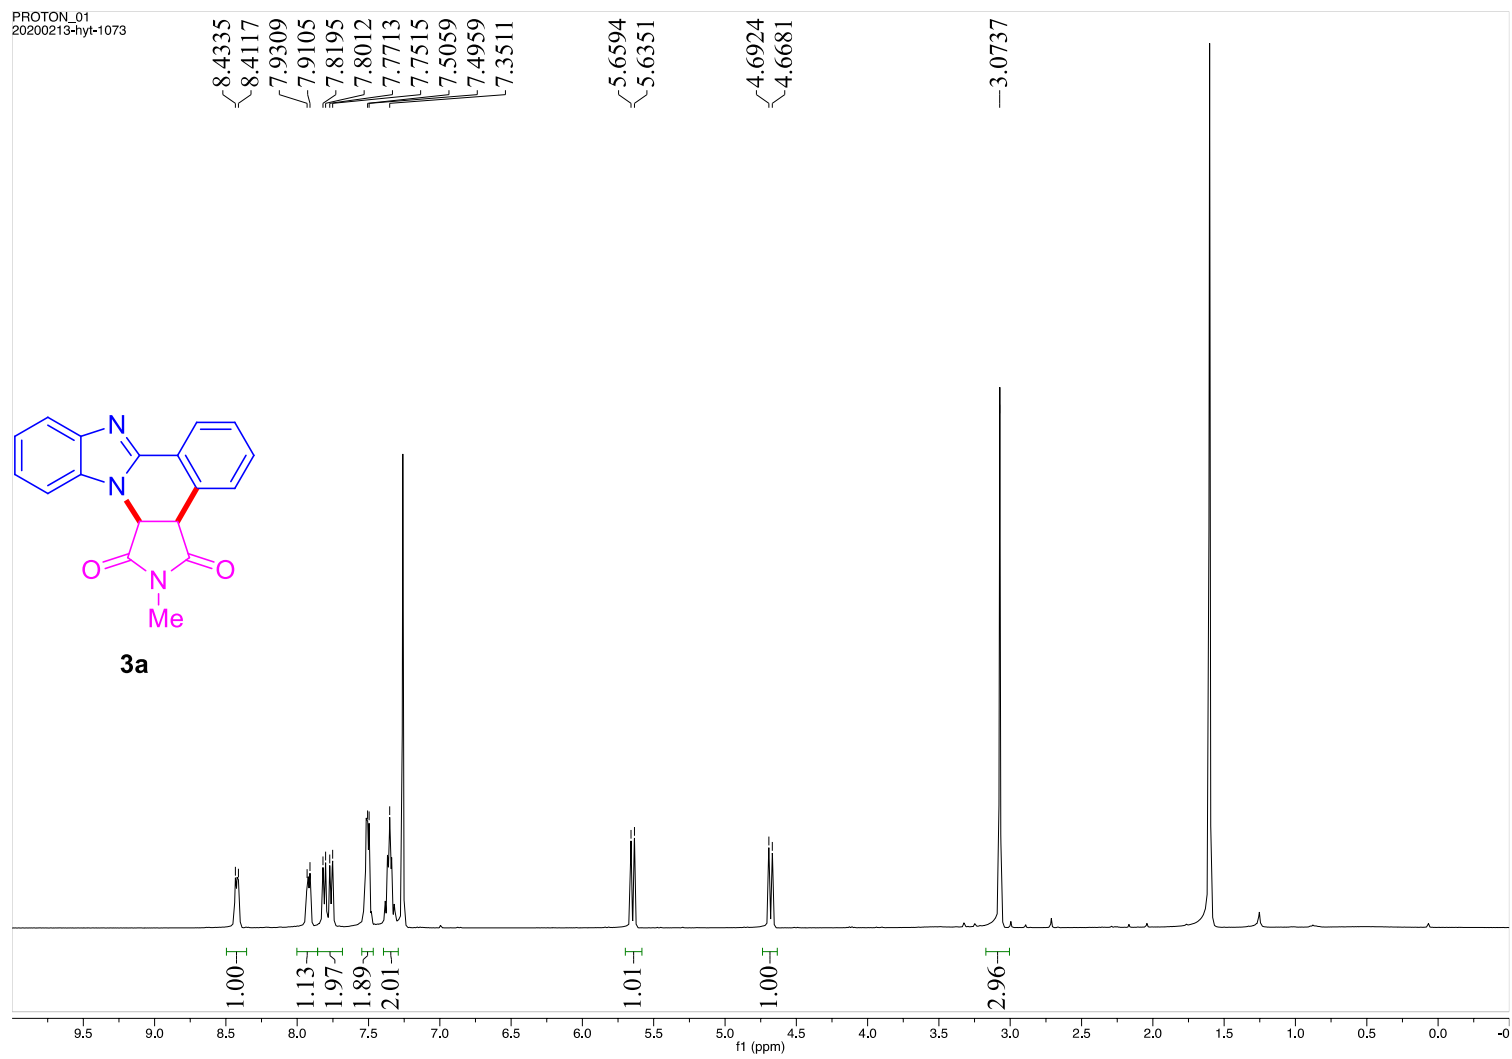

$^1\text{H}$  NMR spectrum (400 MHz) of compound **3a** in  $\text{CDCl}_3$ .

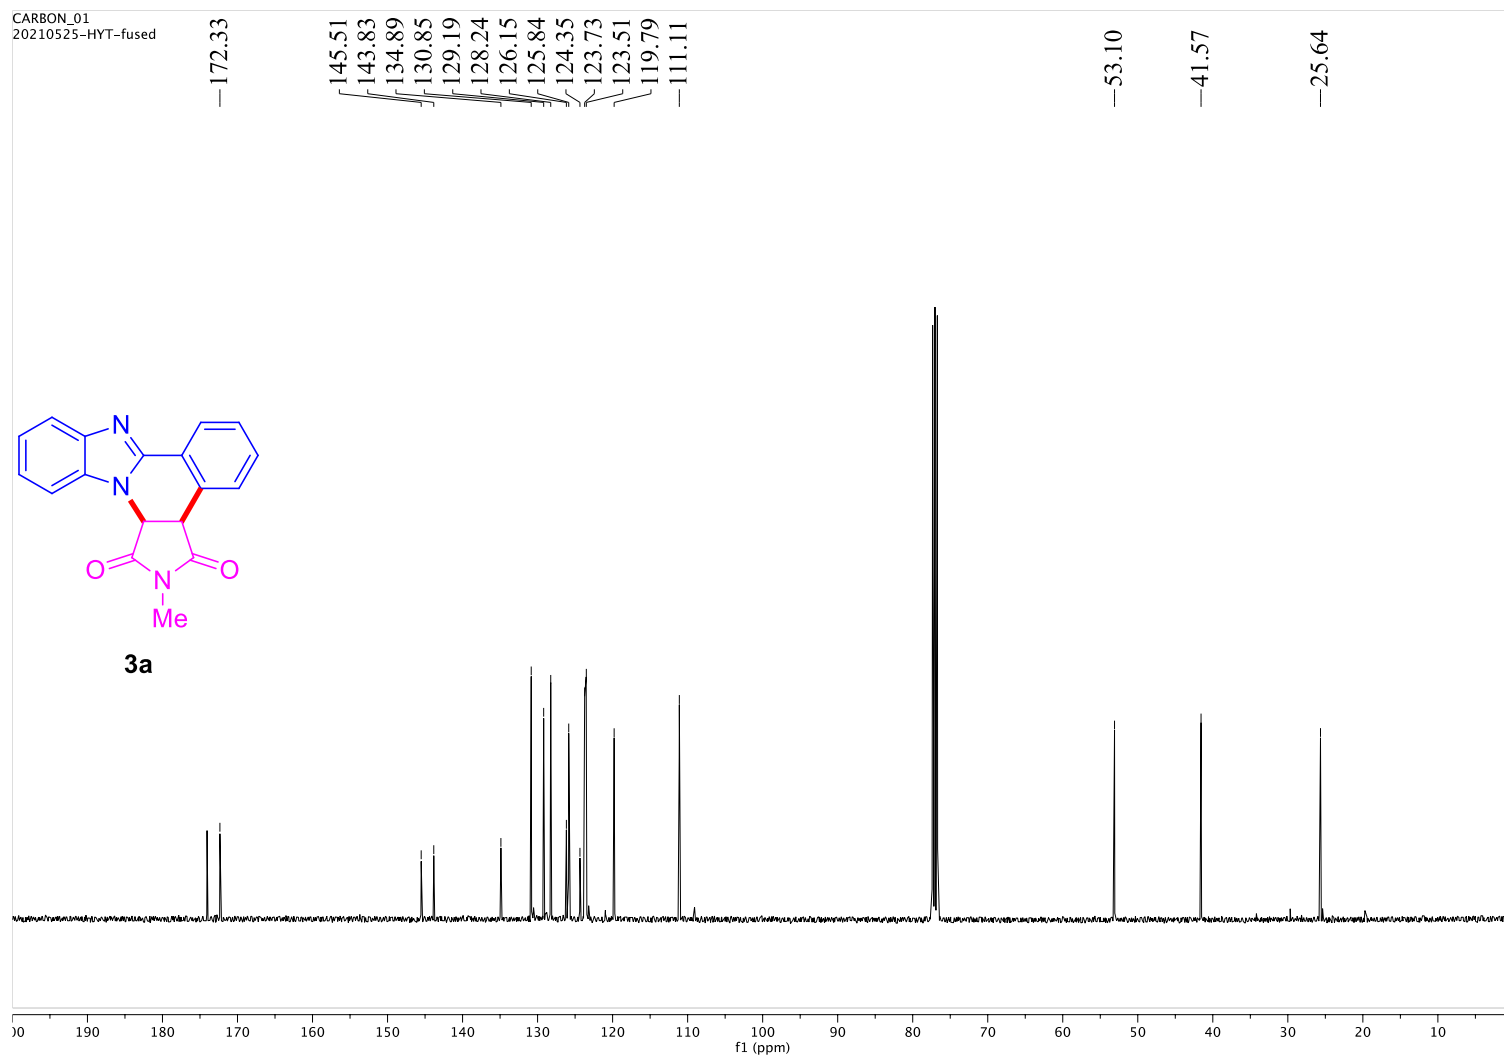

<sup>13</sup>C NMR spectrum (100 MHz) of compound **3a** in CDCl<sub>3</sub>.

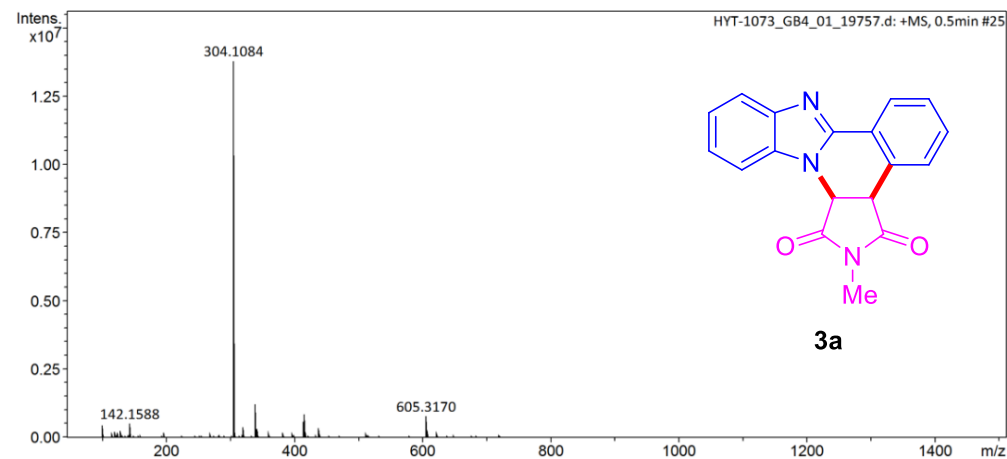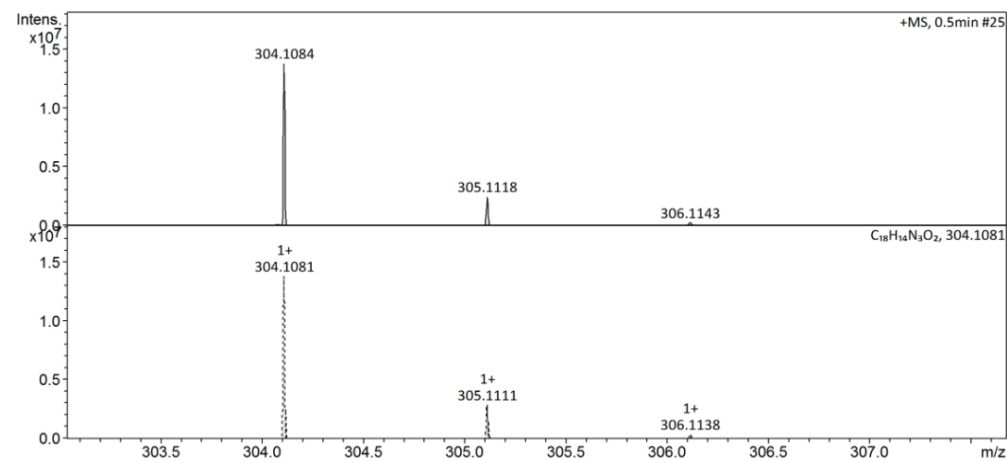

## Display Report

| Meas. m/z | # | Ion Formula                                                   | m/z      | err [ppm] | mSigma | # Sigma | Score  | rdb  | e <sup>-</sup> Conf | N-Rule | Adduct |
|-----------|---|---------------------------------------------------------------|----------|-----------|--------|---------|--------|------|---------------------|--------|--------|
| 304.1084  | 1 | C <sub>18</sub> H <sub>14</sub> N <sub>3</sub> O <sub>2</sub> | 304.1081 | -1.1      | 17.1   | 1       | 100.00 | 13.5 | even                | ok     | M+H    |

HRMS (ESI) of compound **3a**.

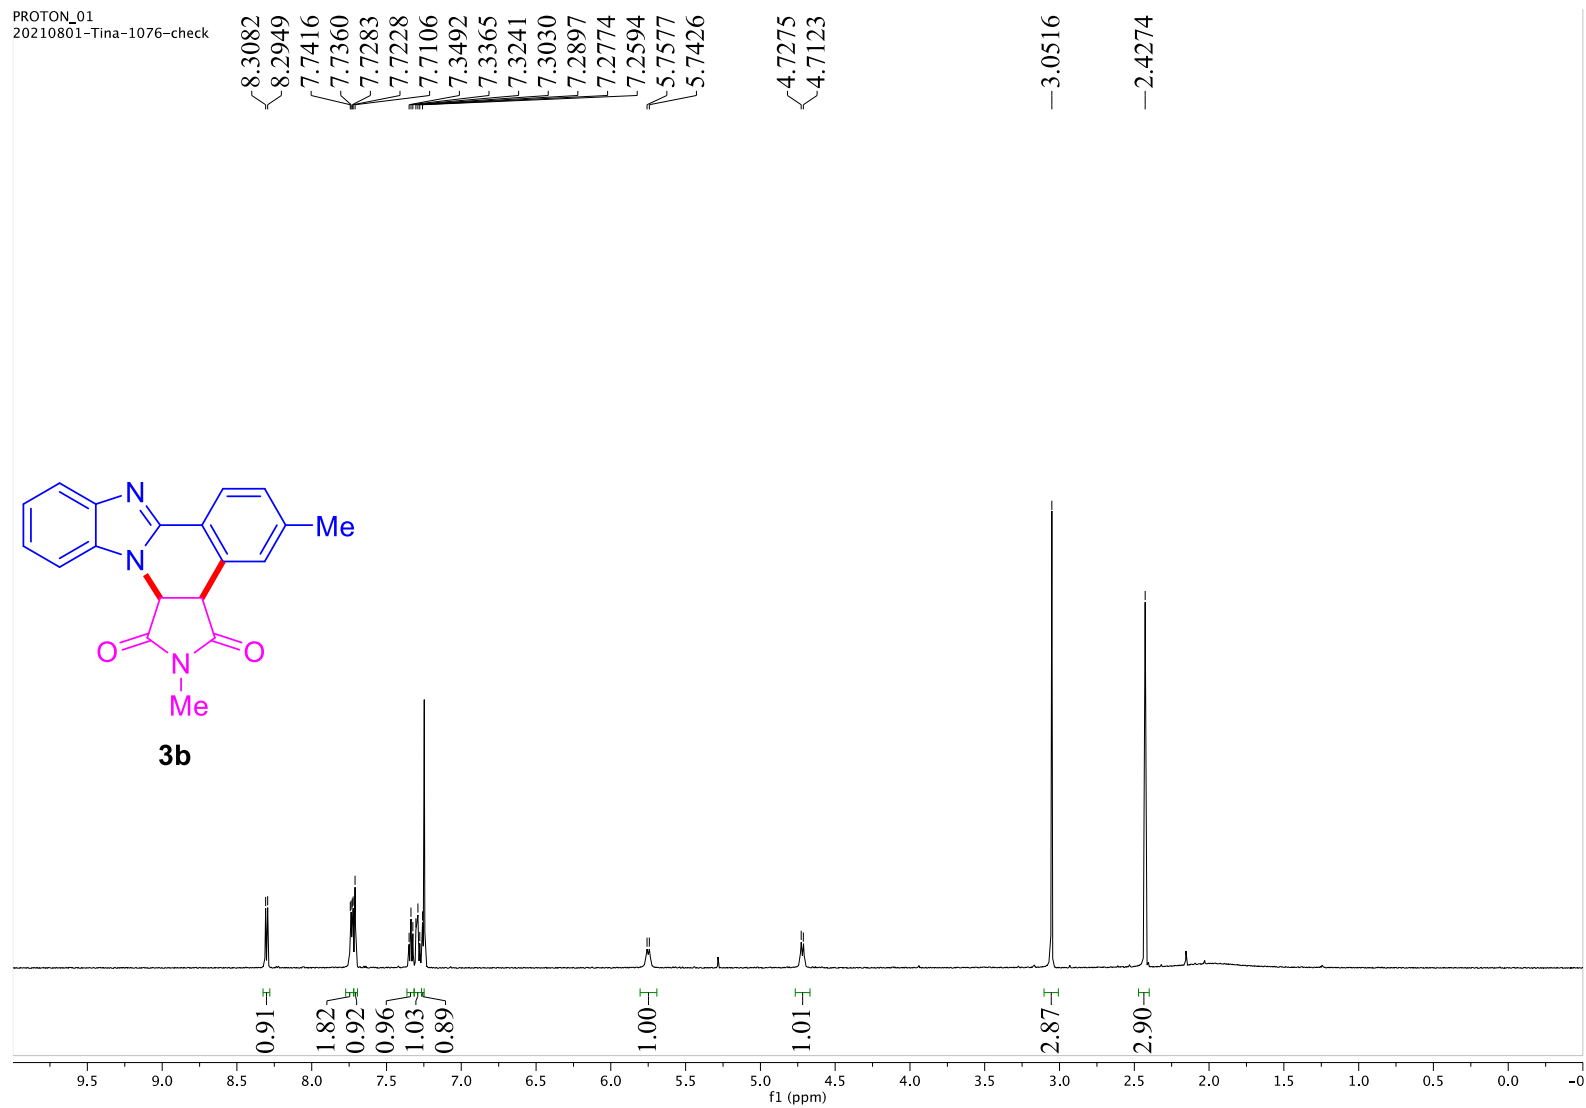

<sup>1</sup>H NMR spectrum (400 MHz) of compound **3b** in CDCl<sub>3</sub>.

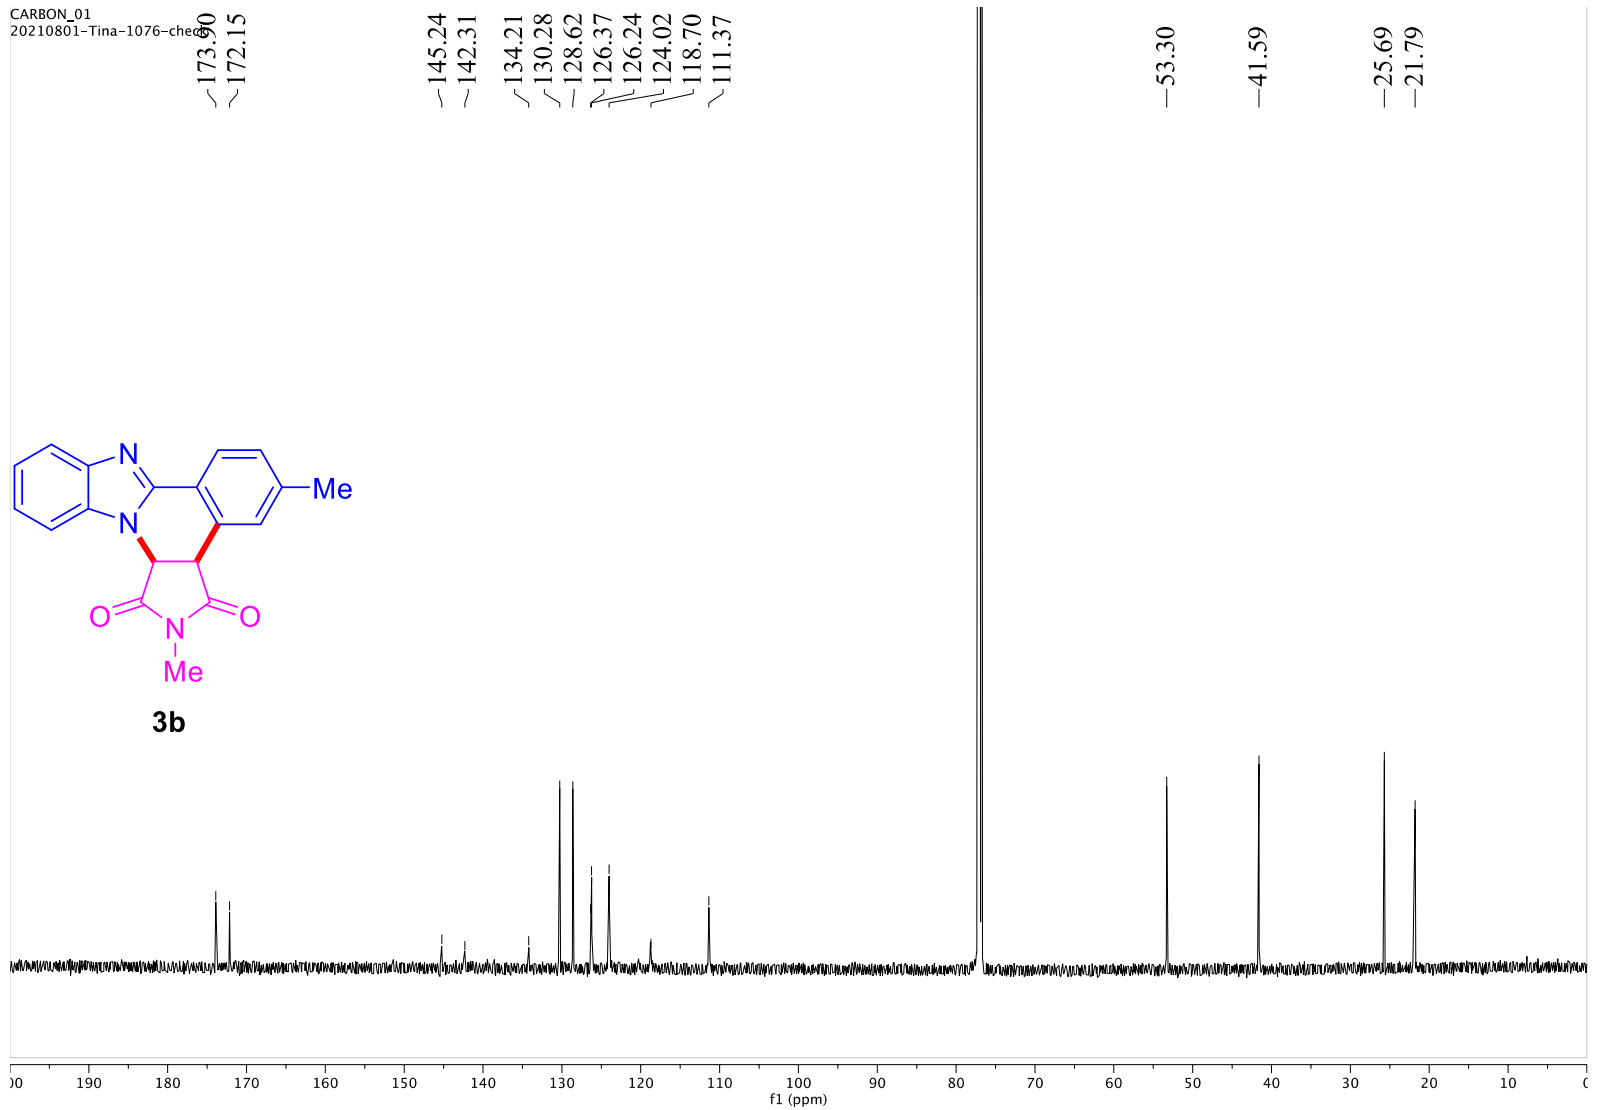

$^{13}\text{C}$  NMR spectrum (100 MHz) of compound **3b** in  $\text{CDCl}_3$ .



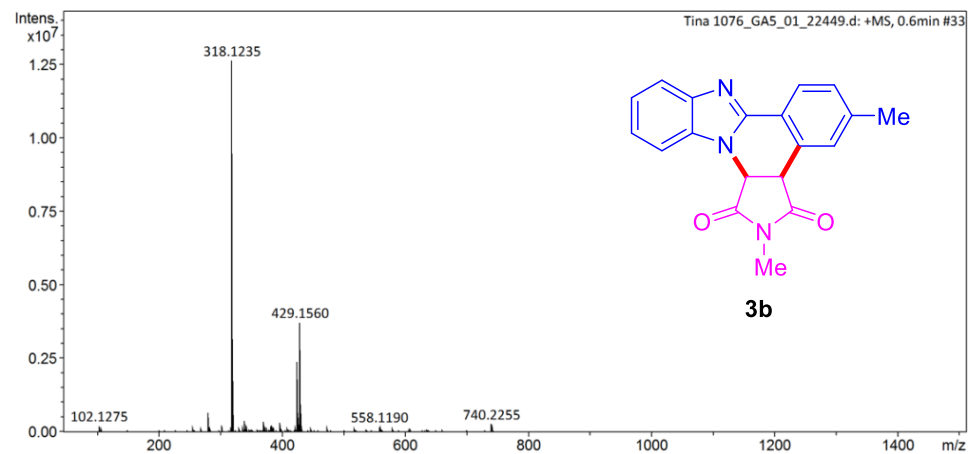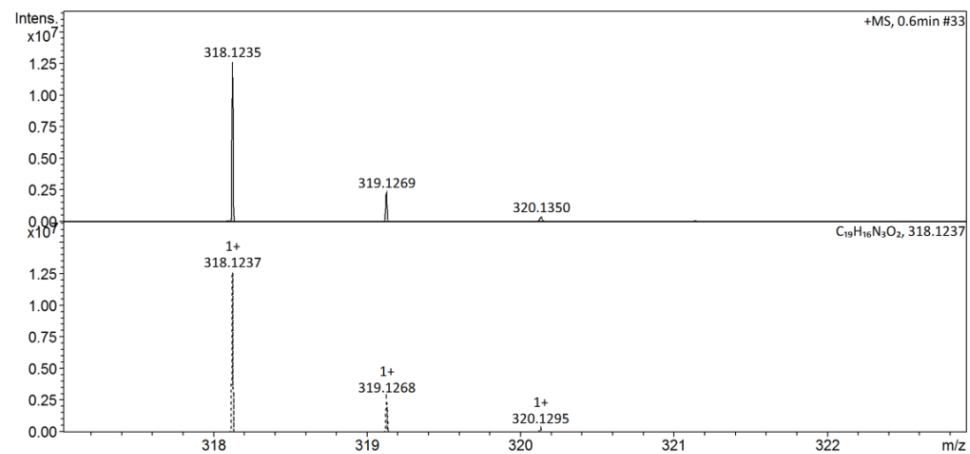

## Display Report

| Meas. m/z | # | Ion Formula                                                   | m/z      | err [ppm] | mSigma | # Sigma | Score  | rdb  | e <sup>-</sup> Conf | N-Rule | Adduct |
|-----------|---|---------------------------------------------------------------|----------|-----------|--------|---------|--------|------|---------------------|--------|--------|
| 318.1235  | 1 | C <sub>19</sub> H <sub>16</sub> N <sub>2</sub> O <sub>2</sub> | 318.1237 | 0.6       | 19.8   | 1       | 100.00 | 13.5 | even                | ok     | M+H    |

HRMS (ESI) of compound **3b**.

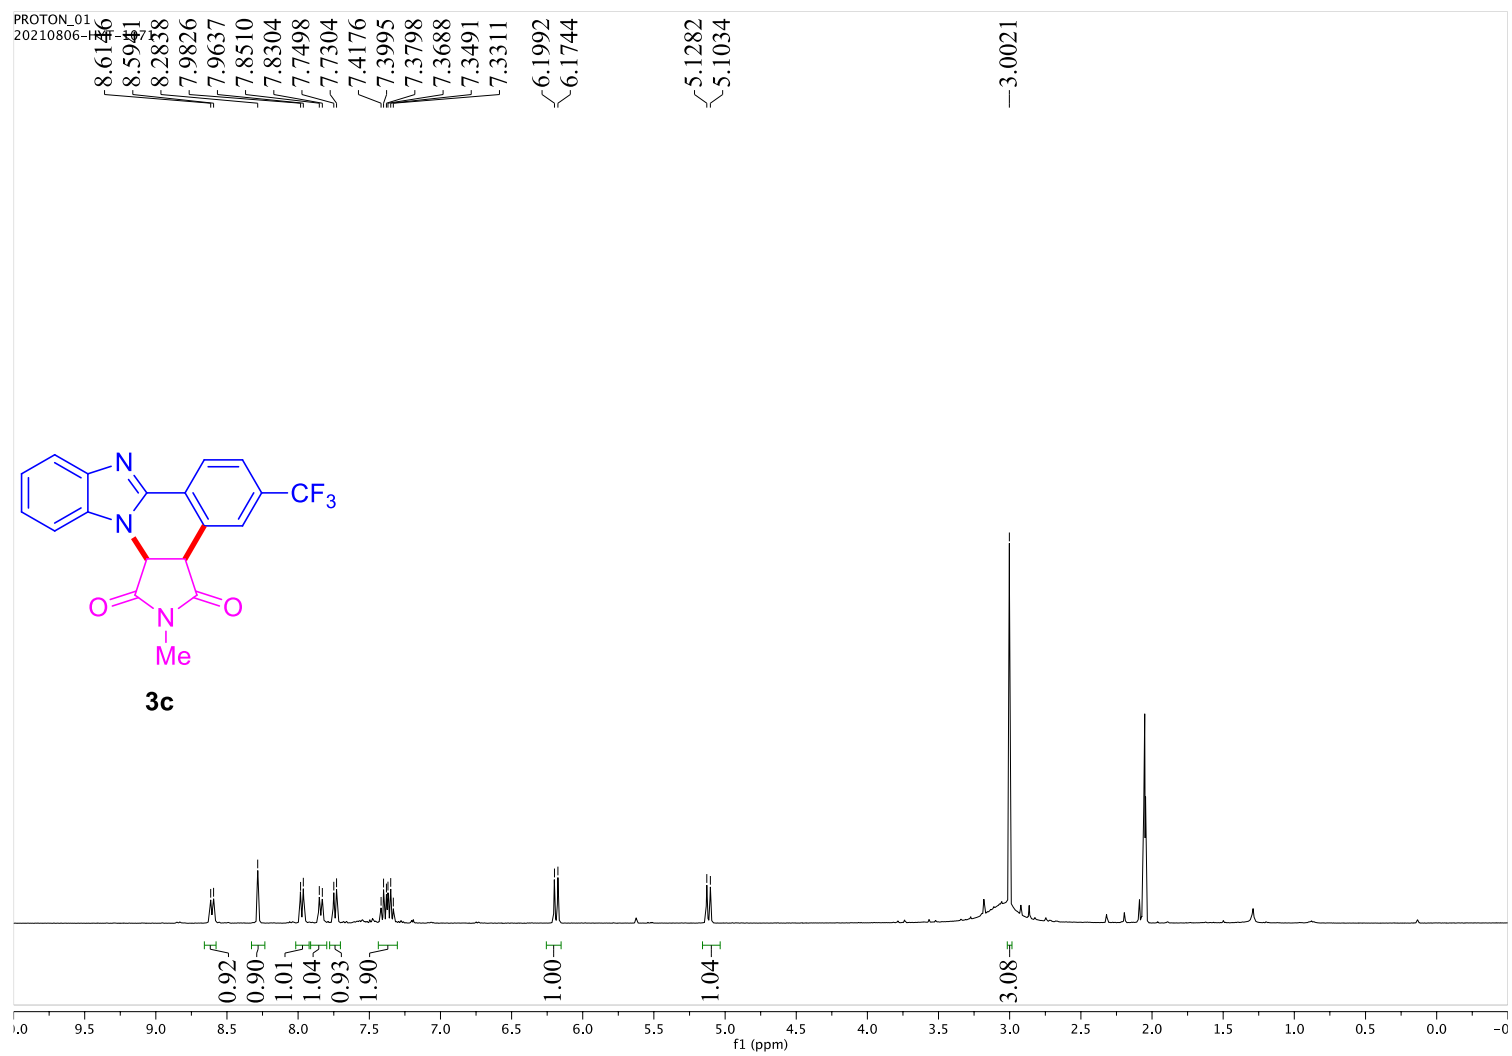

$^1\text{H}$  NMR spectrum (400 MHz) of compound **3c** in acetone- $d_6$ .

CARBON\_01  
20210806-HYT-1071

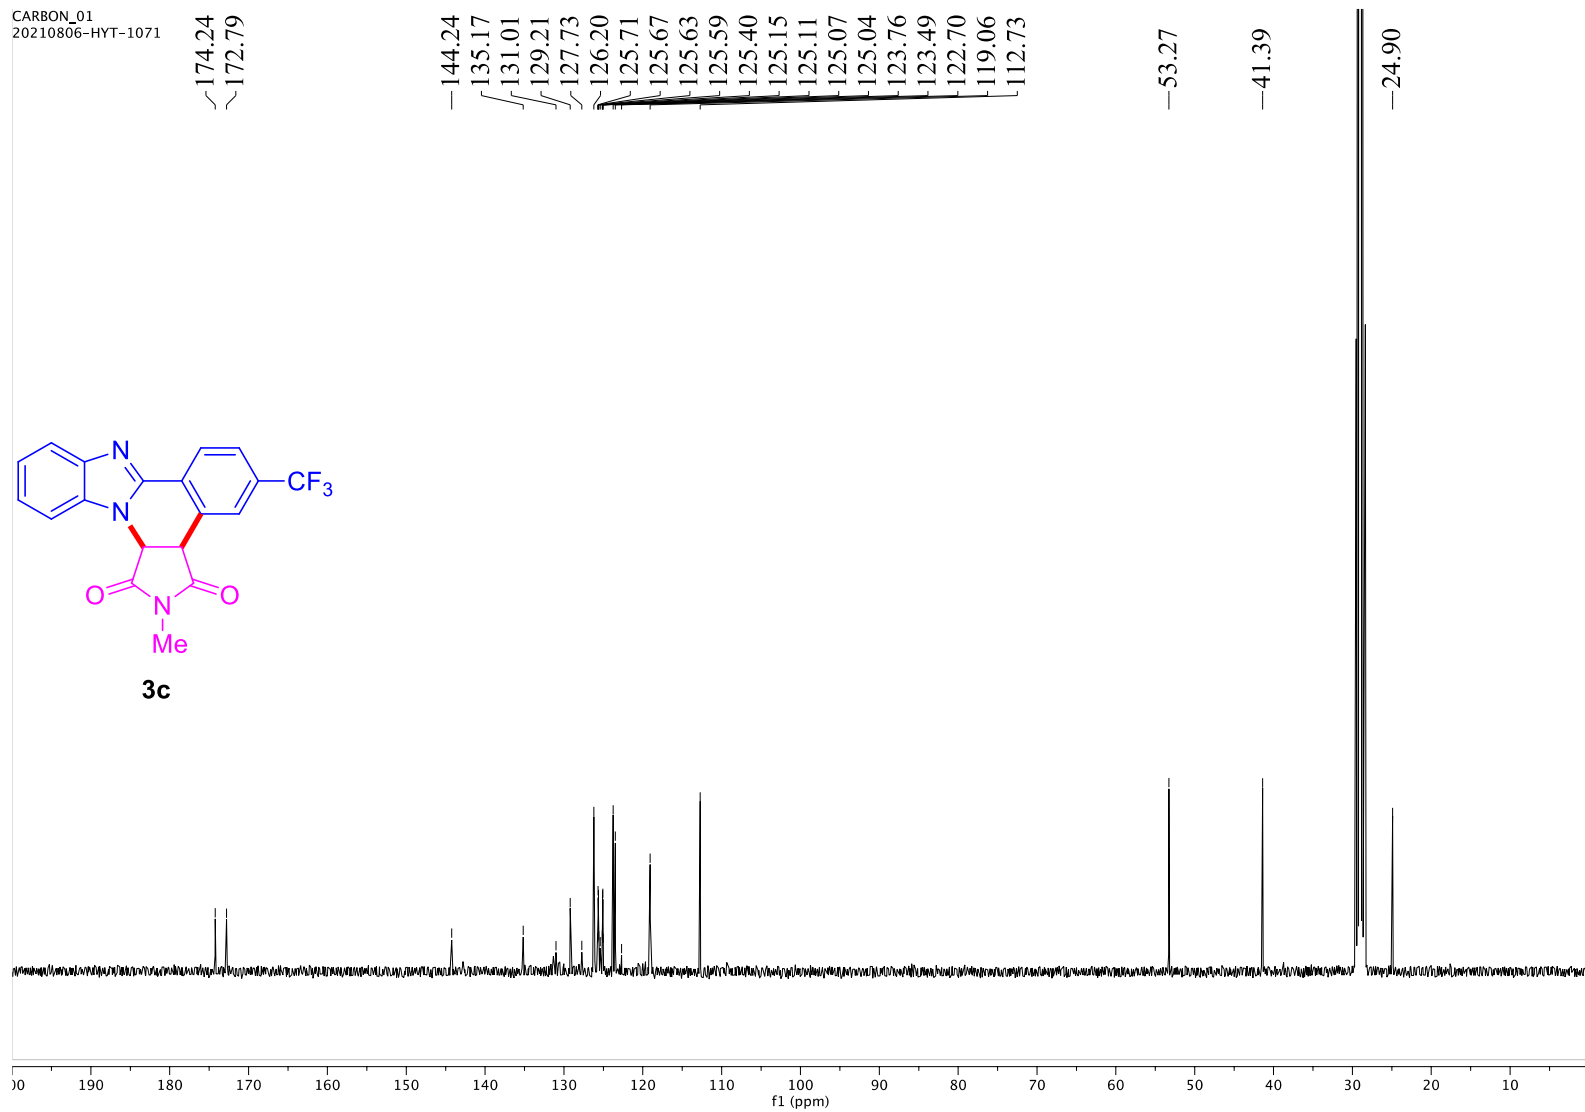

<sup>13</sup>C NMR spectrum (100 MHz) of compound **3c** in acetone-*d*<sub>6</sub>.

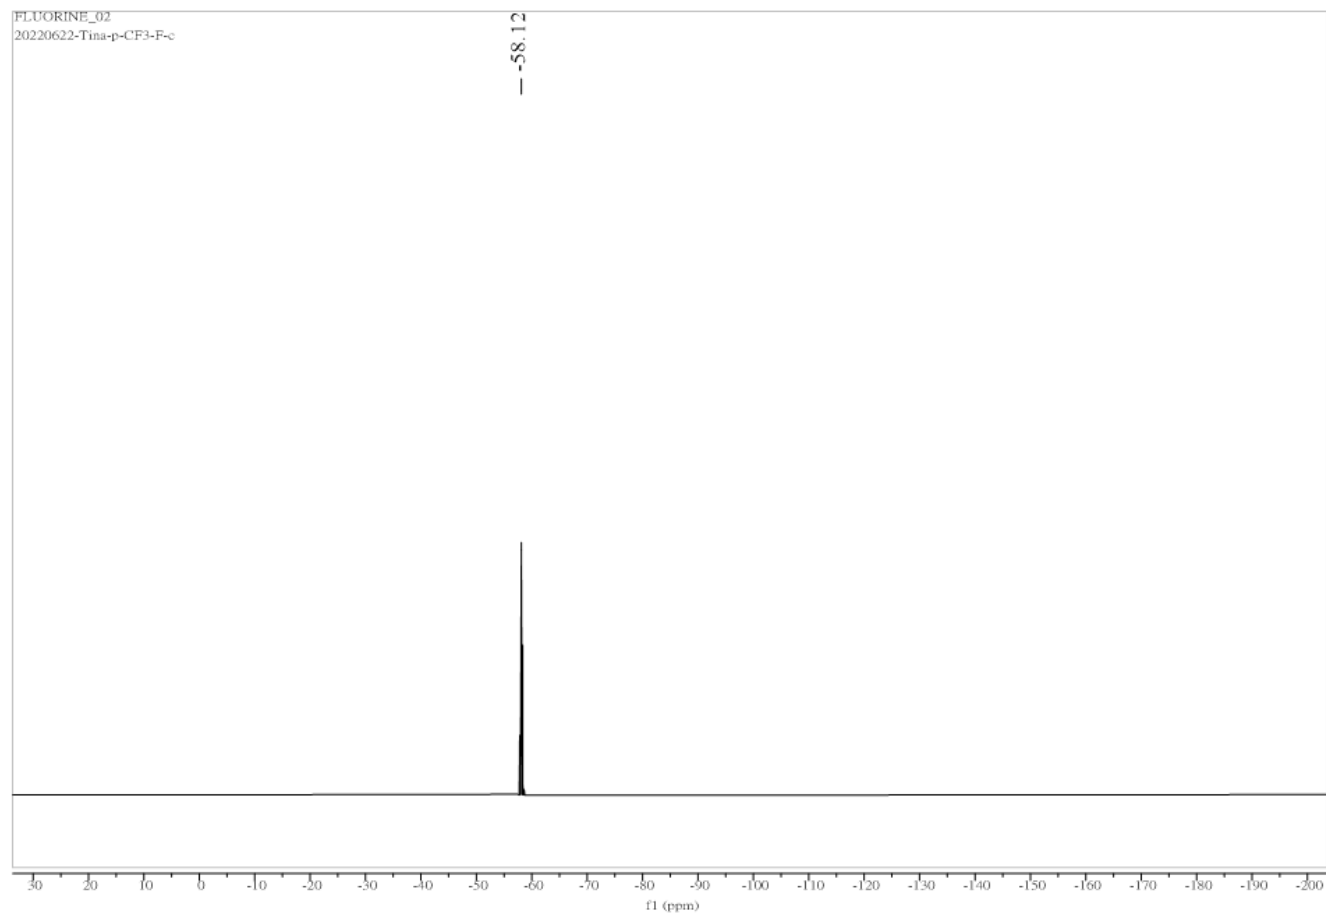

<sup>19</sup>F NMR spectrum (376 MHz) of compound **3c** in CDCl<sub>3</sub>.

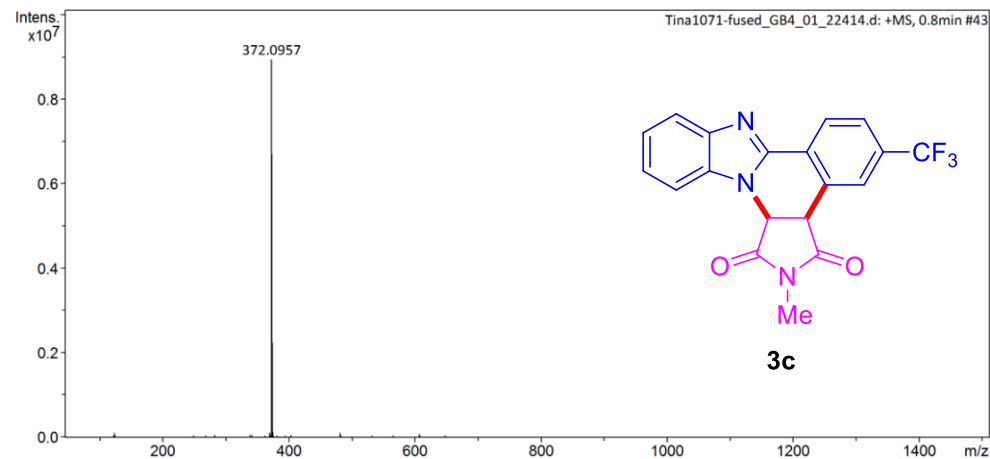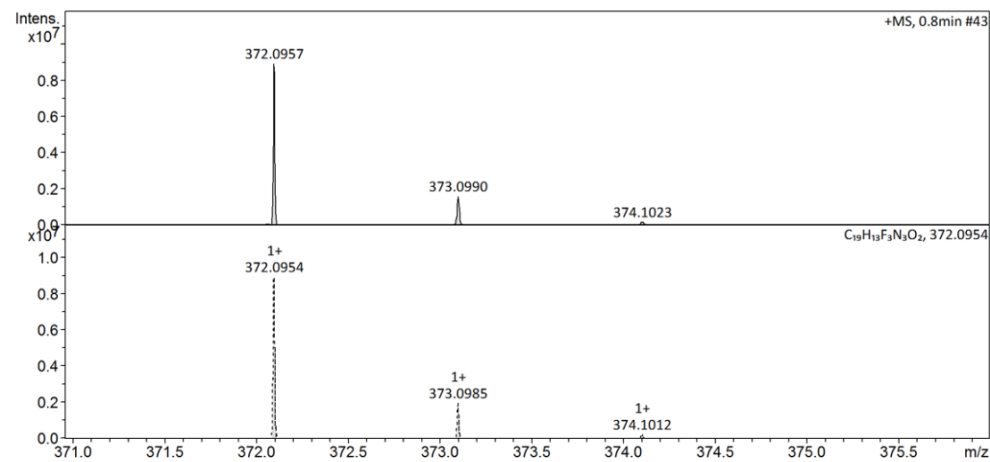

## Display Report

| Meas. m/z | # | Ion Formula                                                                  | m/z      | err [ppm] | mSigma | # Sigma | Score  | rdb  | e <sup>-</sup> Conf | N-Rule | Adduct |
|-----------|---|------------------------------------------------------------------------------|----------|-----------|--------|---------|--------|------|---------------------|--------|--------|
| 372.0957  | 1 | C <sub>19</sub> H <sub>13</sub> F <sub>3</sub> N <sub>3</sub> O <sub>2</sub> | 372.0954 | 0.8       | 23.2   | 1       | 100.00 | 13.5 | even                | ok     | M+H    |

HRMS (ESI) of compound **3c**.

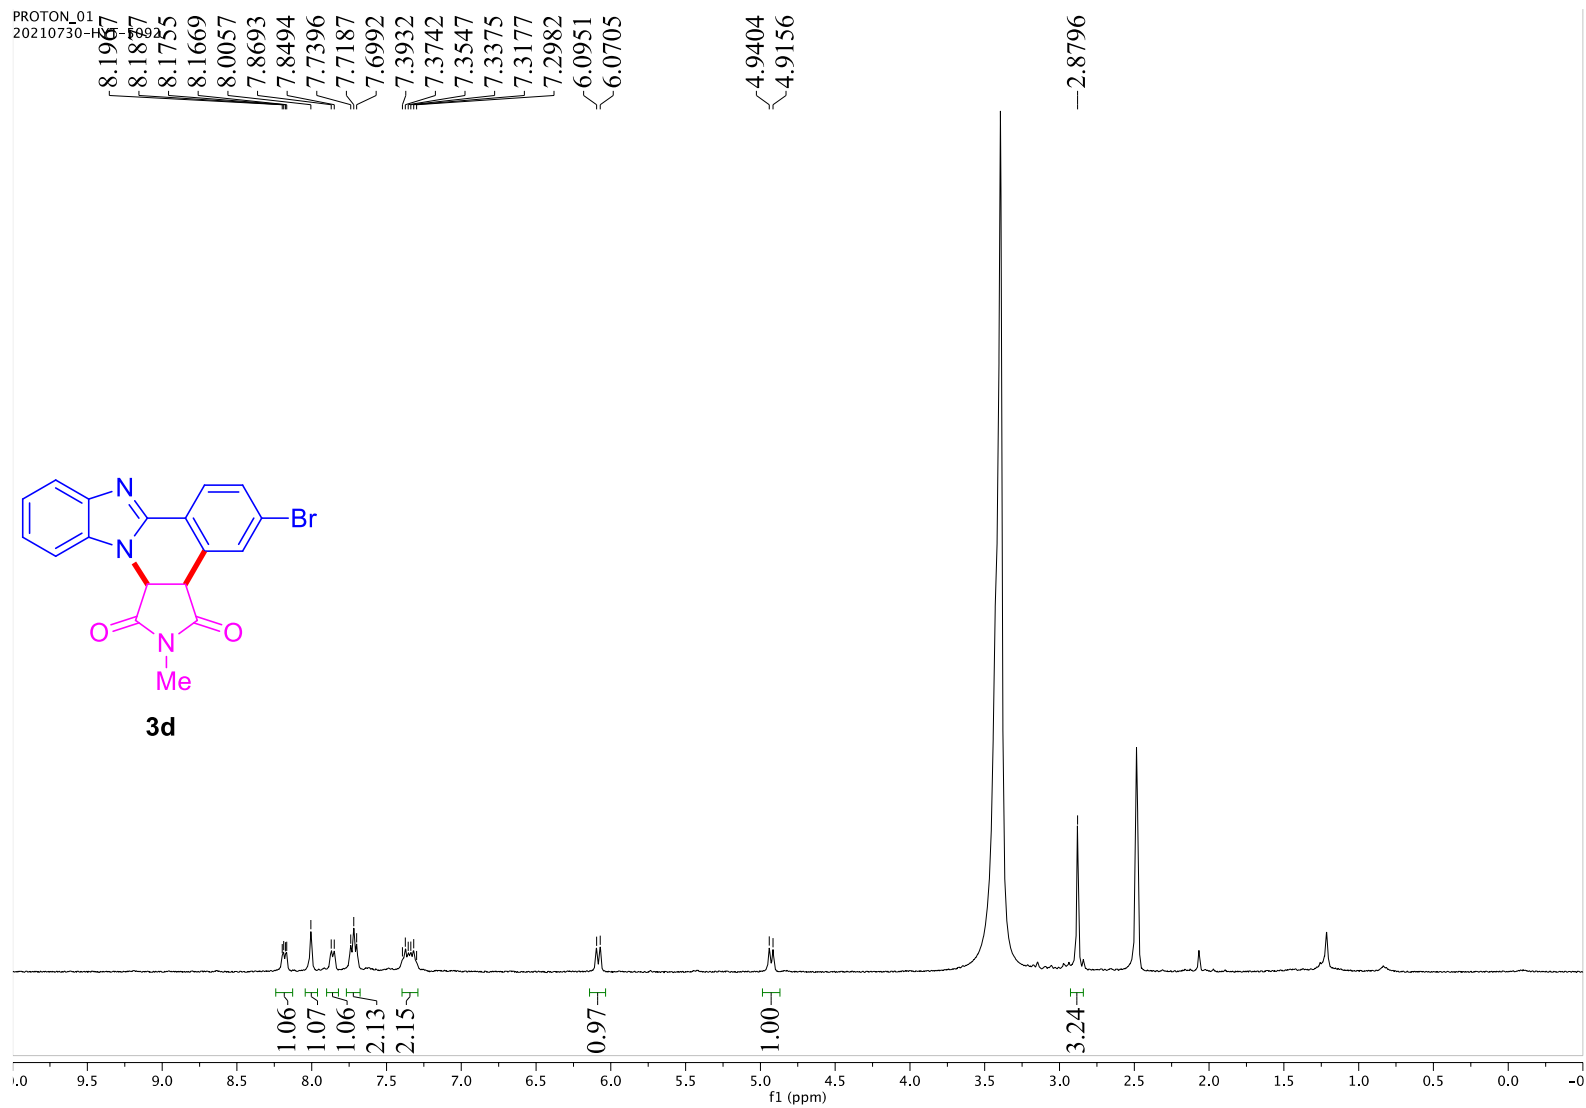

$^1\text{H}$  NMR spectrum (400 MHz) of compound **3d** in  $\text{DMSO-}d_6$ .

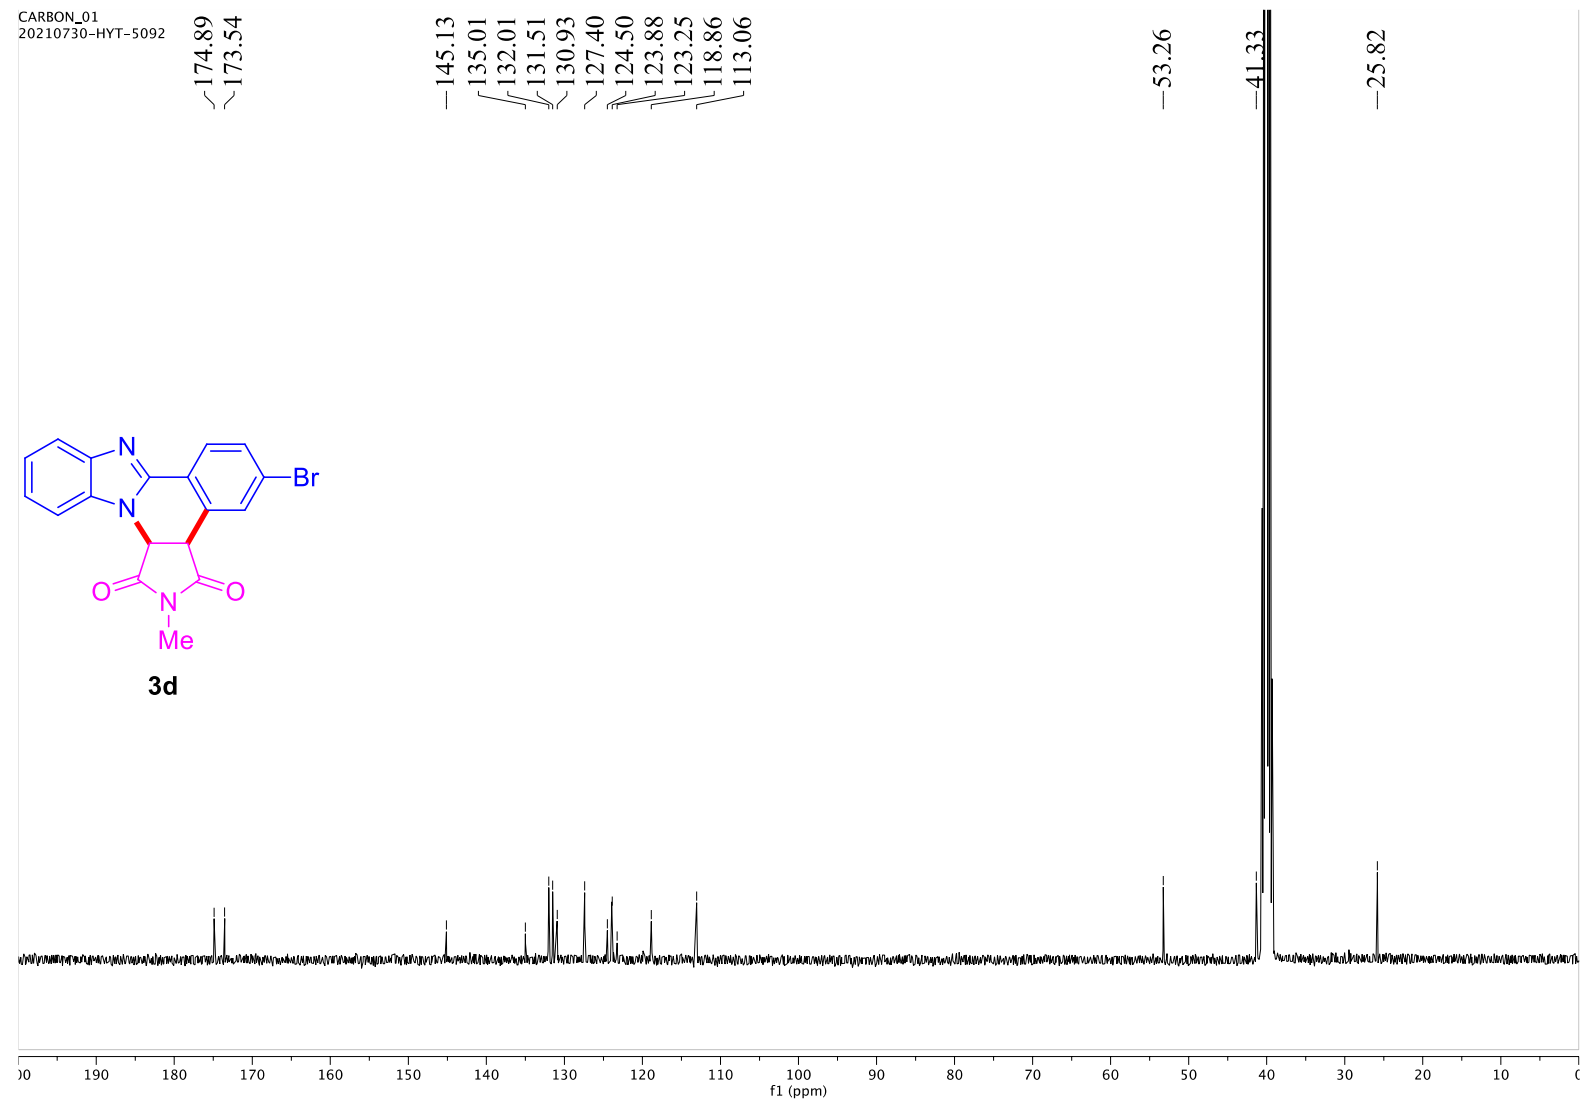

$^{13}\text{C}$  NMR spectrum (100 MHz) of compound **3d** in  $\text{DMSO-}d_6$ .

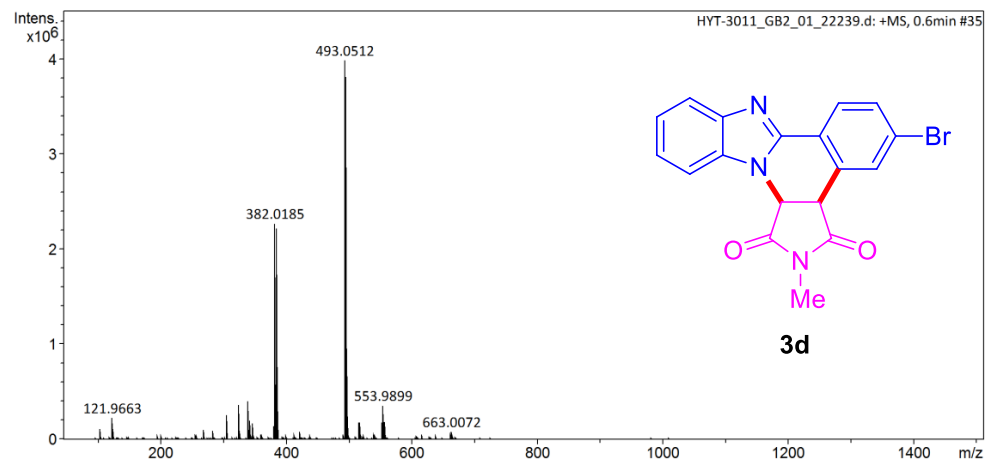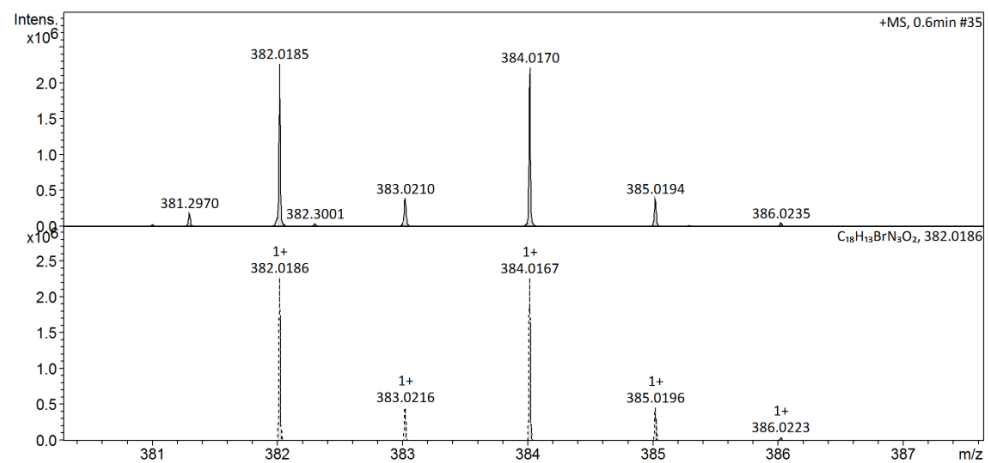

## Display Report

| Meas. m/z | # | Ion Formula                                                     | m/z      | err [ppm] | mSigma | # Sigma | Score  | rdb  | e <sup>-</sup> Conf | N-Rule | Adduct |
|-----------|---|-----------------------------------------------------------------|----------|-----------|--------|---------|--------|------|---------------------|--------|--------|
| 382.0185  | 1 | C <sub>18</sub> H <sub>13</sub> BrN <sub>3</sub> O <sub>2</sub> | 382.0186 | -0.2      | 22.9   | 1       | 100.00 | 13.5 | even                | ok     | M+H    |

HRMS (ESI) of compound **3d**.



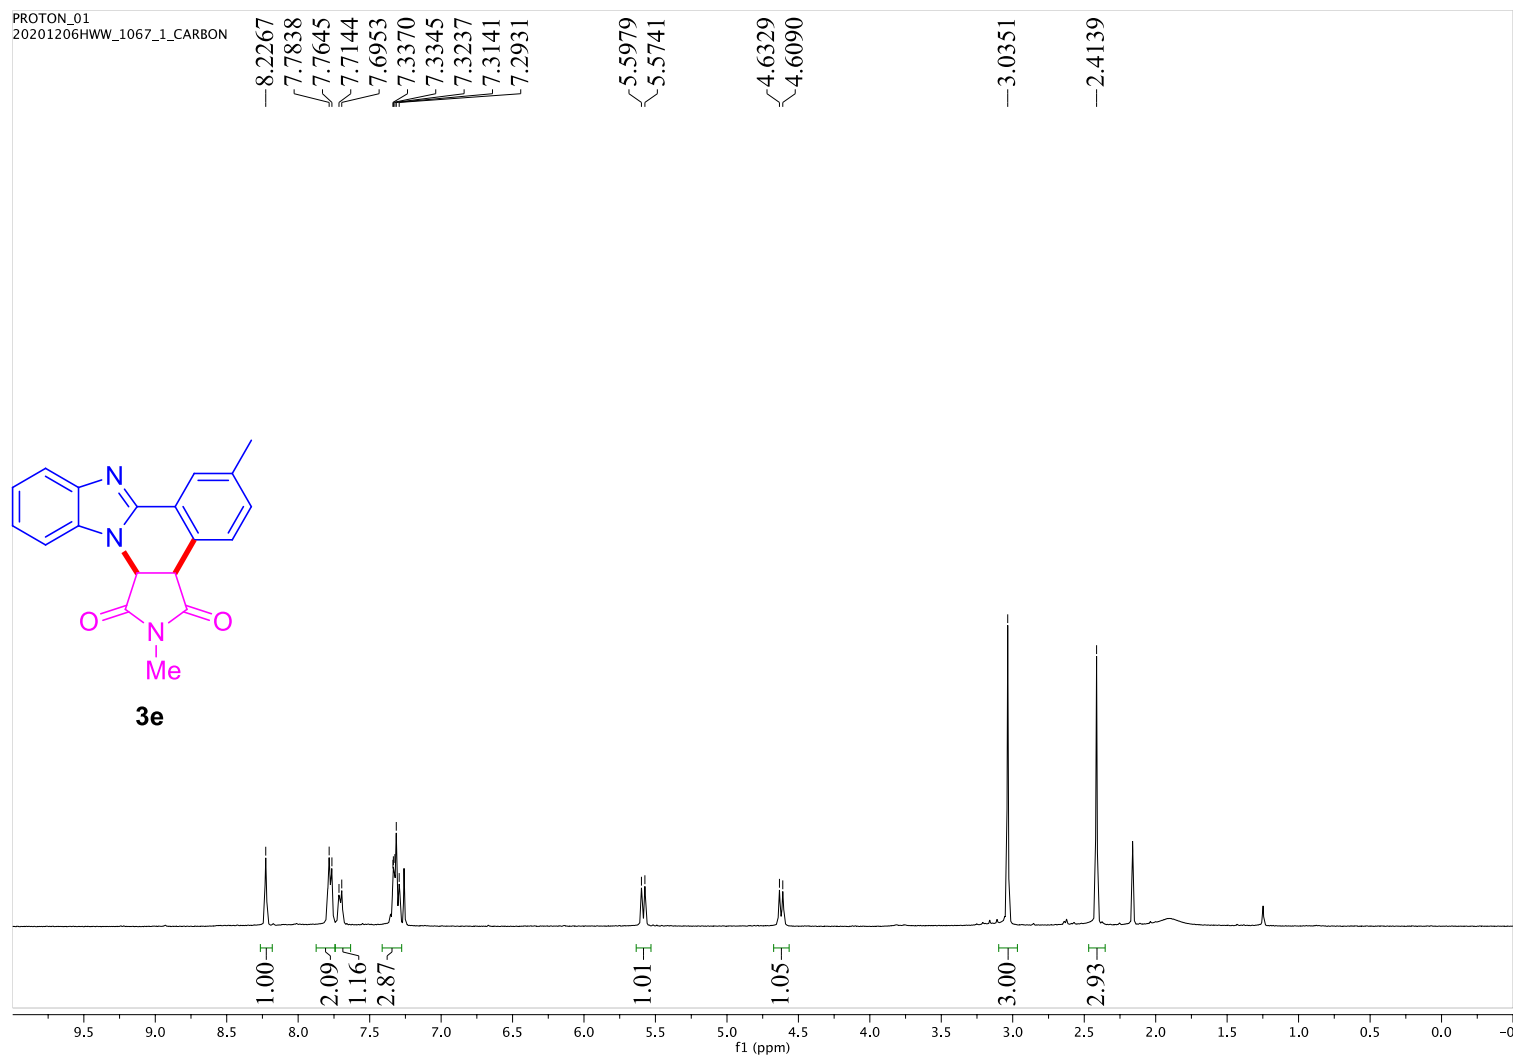

$^1\text{H}$  NMR spectrum (400 MHz) of compound **3e** in  $\text{CDCl}_3$ .

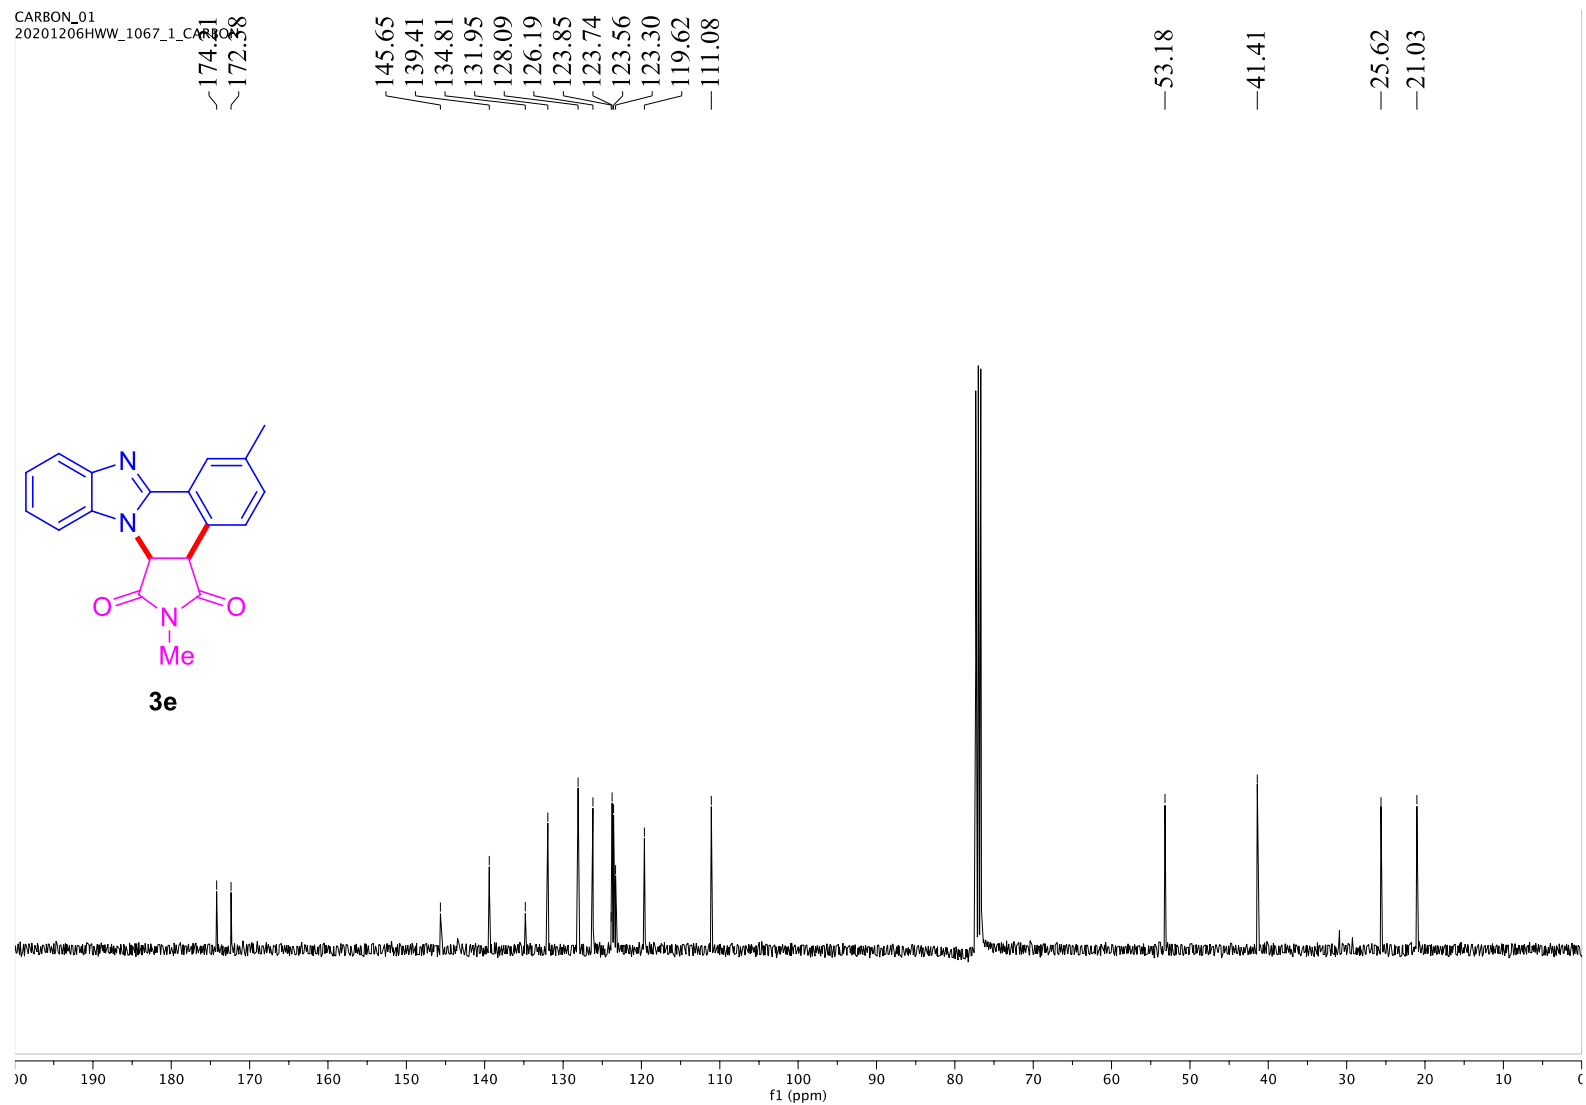

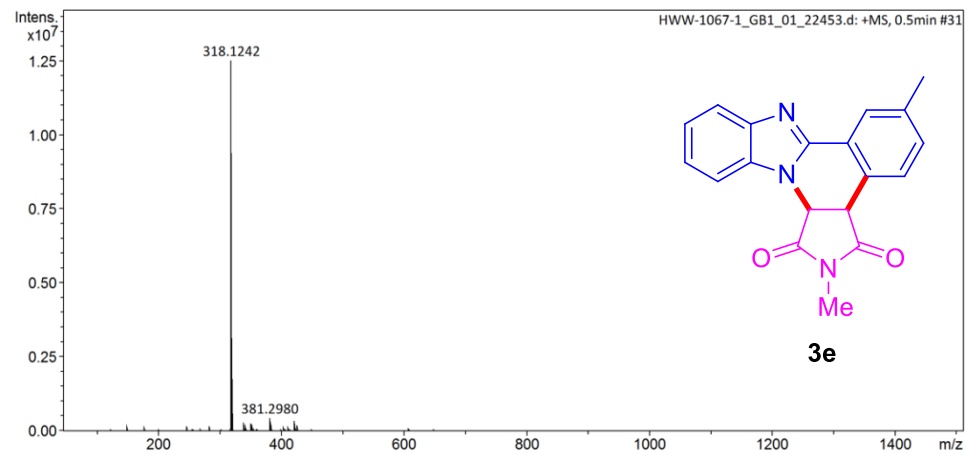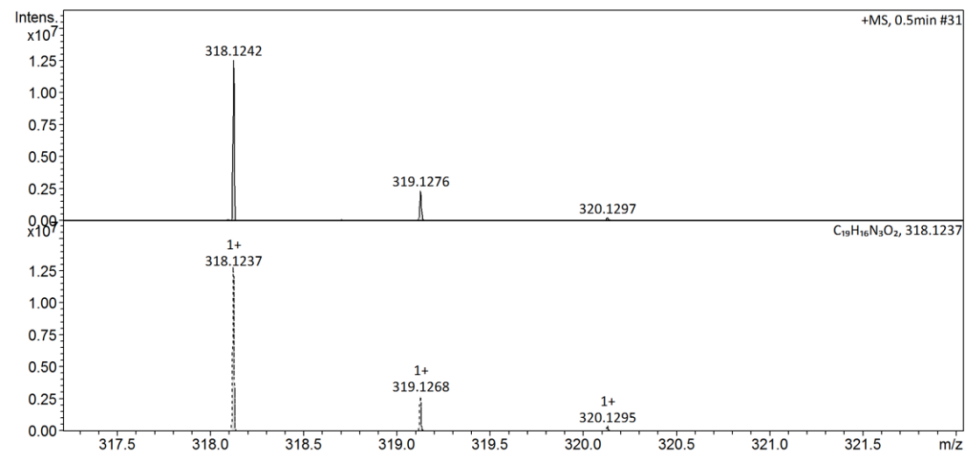

## Display Report

| Meas. m/z | # | Ion Formula                                                   | m/z      | err [ppm] | mSigma | # Sigma | Score  | rdb  | e <sup>-</sup> Conf | N-Rule | Adduct |
|-----------|---|---------------------------------------------------------------|----------|-----------|--------|---------|--------|------|---------------------|--------|--------|
| 318.1242  | 1 | C <sub>19</sub> H <sub>16</sub> N <sub>2</sub> O <sub>2</sub> | 318.1237 | -1.5      | 19.7   | 1       | 100.00 | 13.5 | even                | ok     | M+H    |

HRMS (ESI) of compound **3e**.

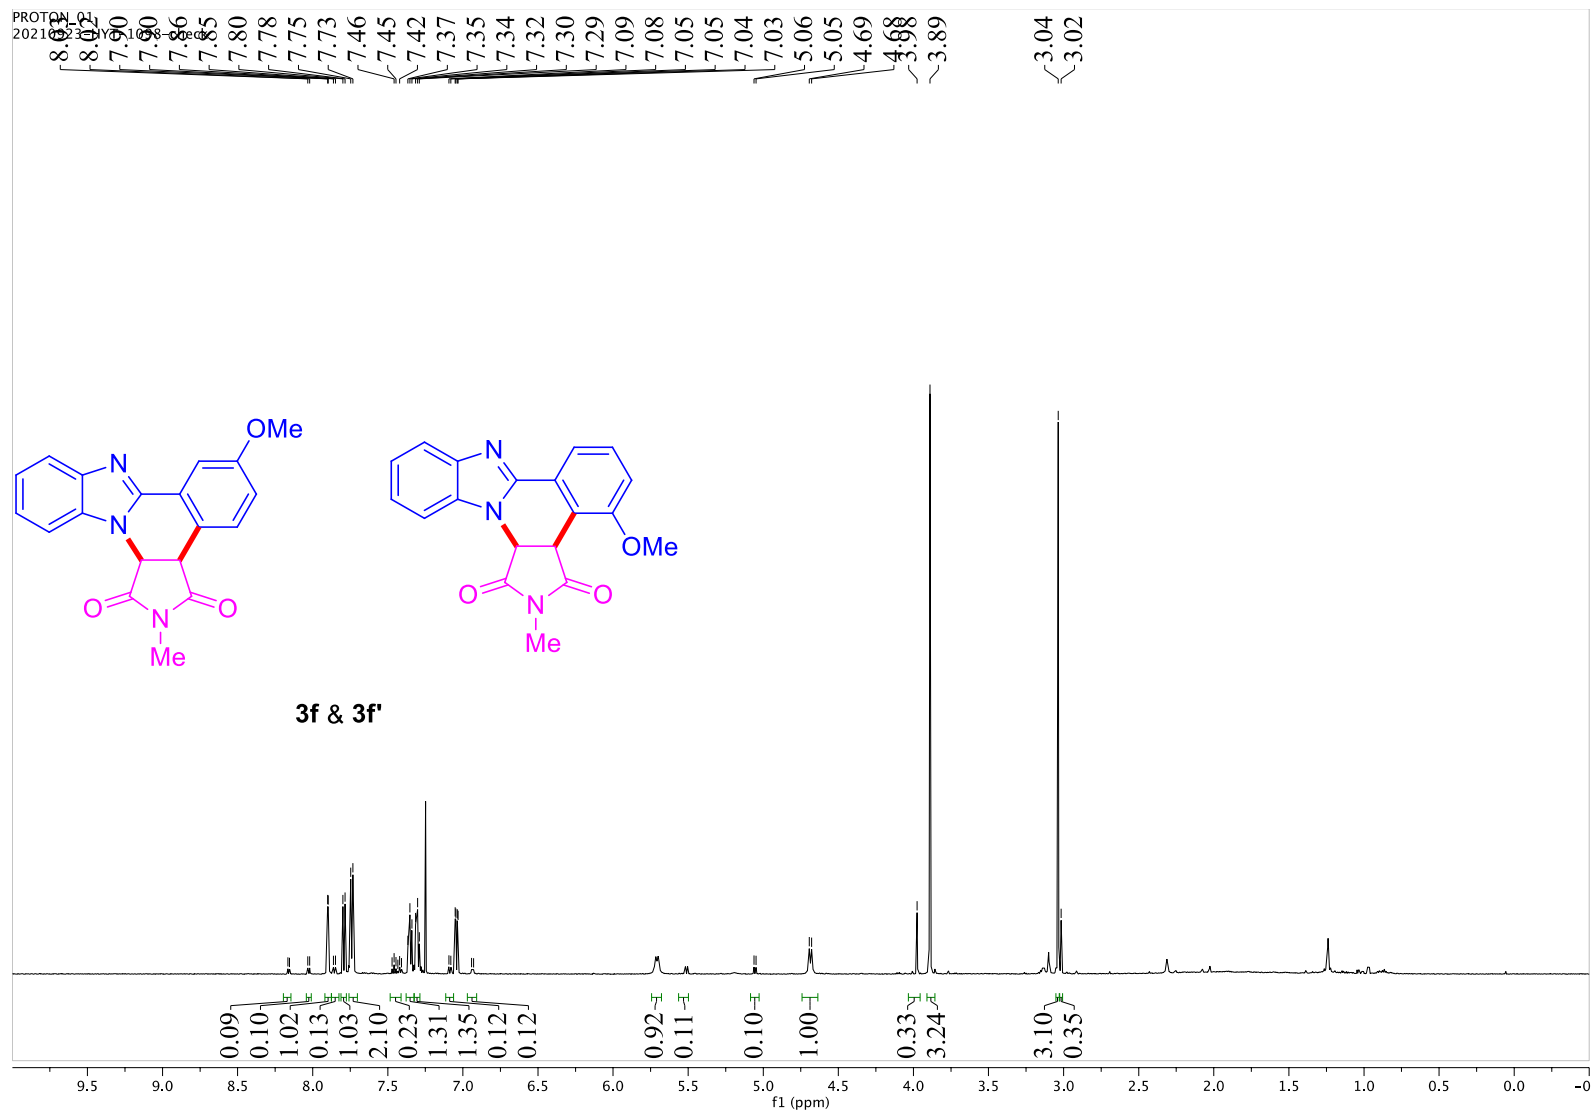

<sup>1</sup>H NMR spectrum (400 MHz) of compound **3f** & **3f'** in CDCl<sub>3</sub>.

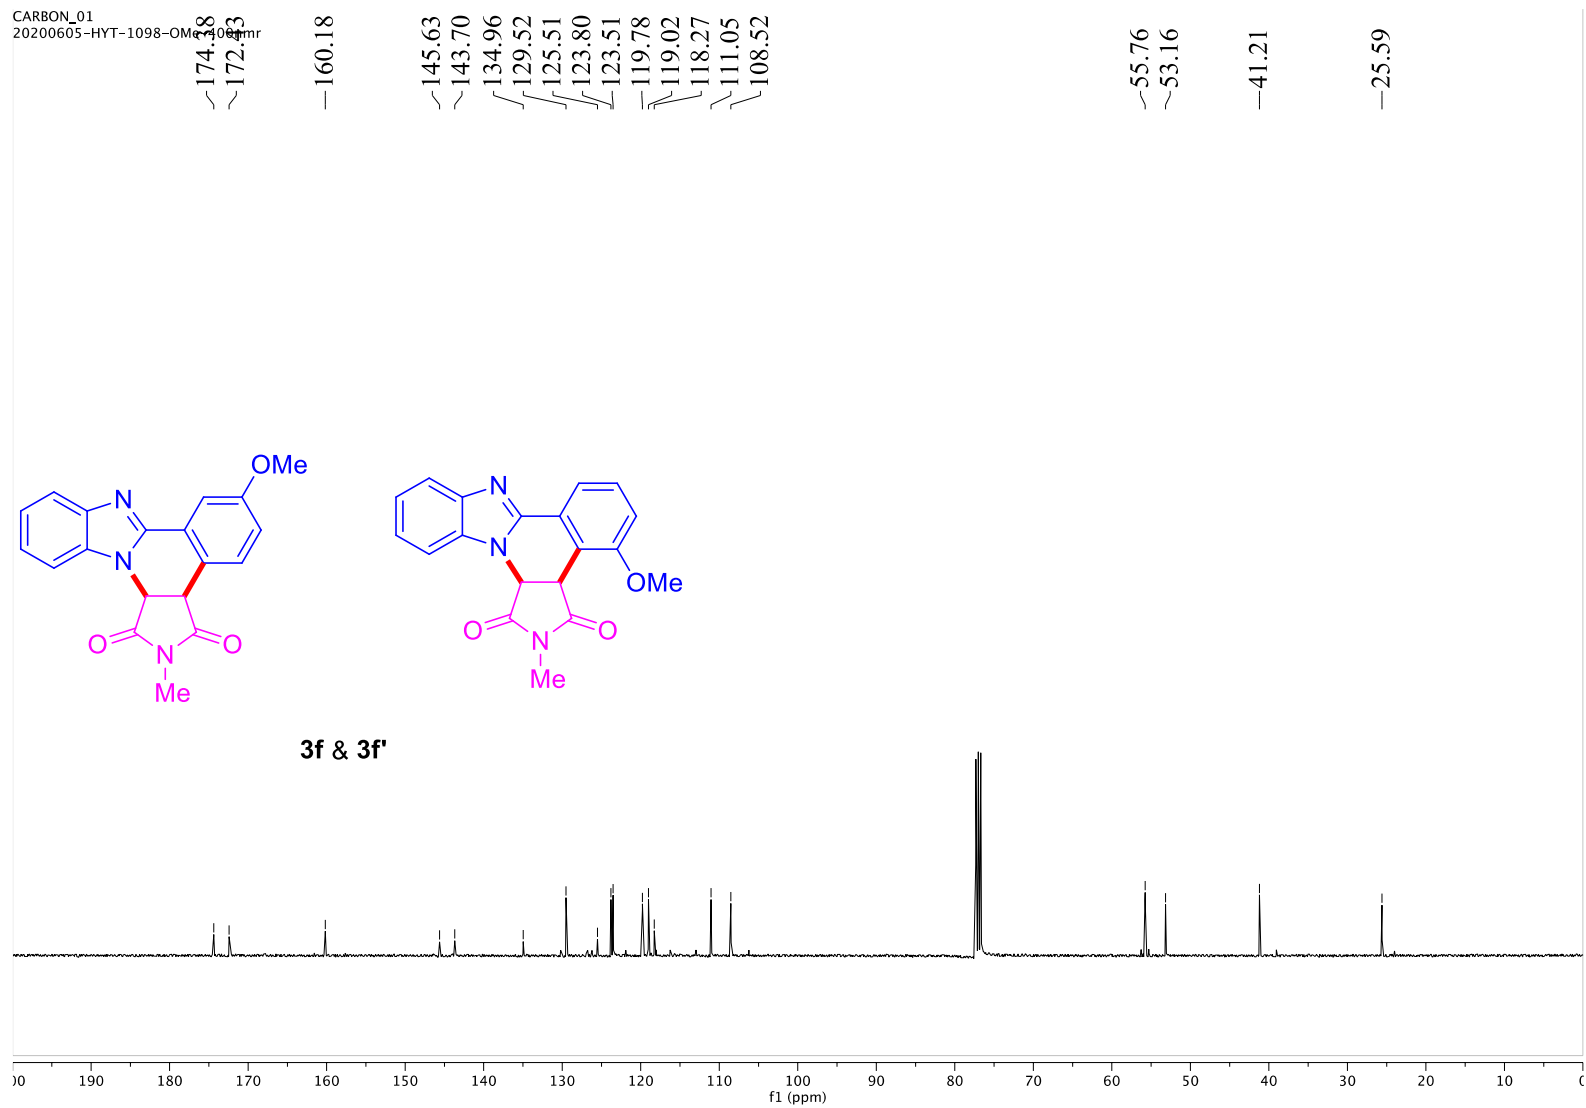

$^{13}\text{C}$  NMR spectrum (100 MHz) of compound **3f** & **3f'** in  $\text{CDCl}_3$ .

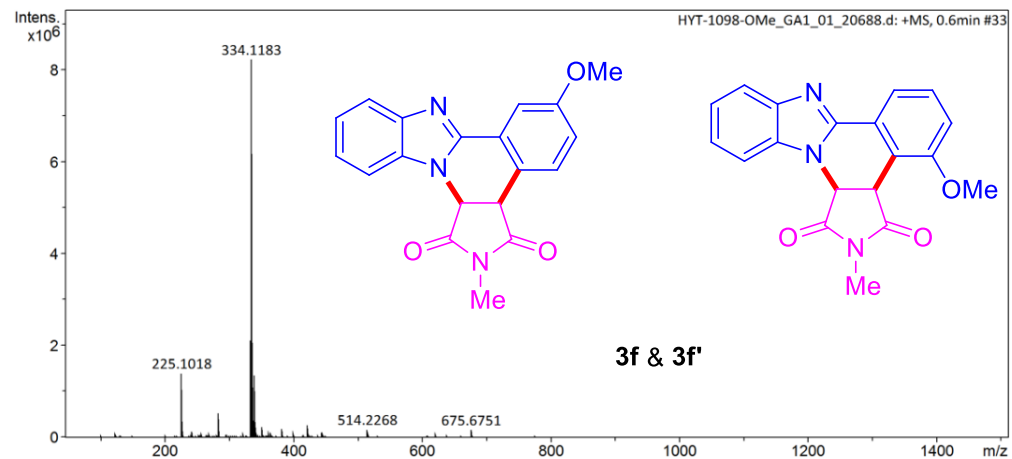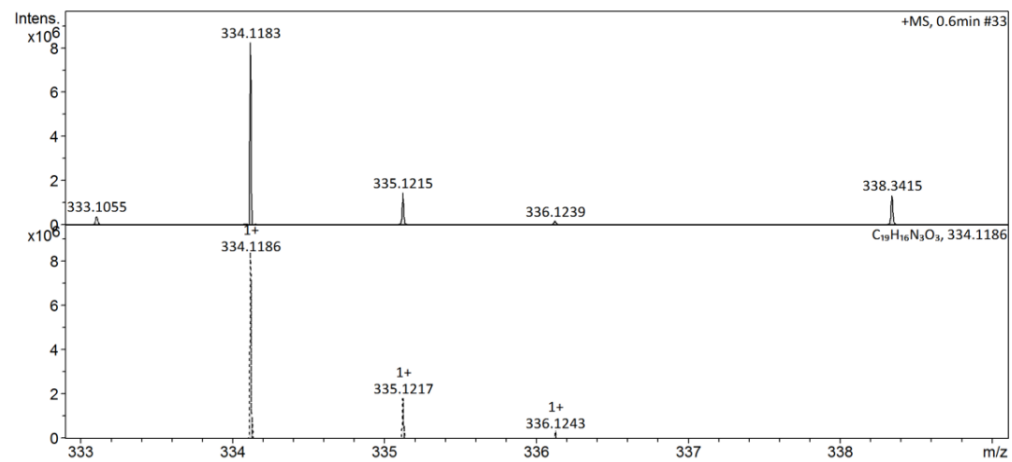

### Display Report

| Meas. m/z | # | Ion Formula                                                   | m/z      | err [ppm] | mSigma | # Sigma | Score  | rdb  | e <sup>-</sup> Conf | N-Rule | Adduct |
|-----------|---|---------------------------------------------------------------|----------|-----------|--------|---------|--------|------|---------------------|--------|--------|
| 334.1183  | 1 | C <sub>19</sub> H <sub>16</sub> N <sub>3</sub> O <sub>3</sub> | 334.1186 | -0.9      | 25.9   | 1       | 100.00 | 13.5 | even                | ok     | M+H    |

HRMS (ESI) of compound **3f & 3f'**.

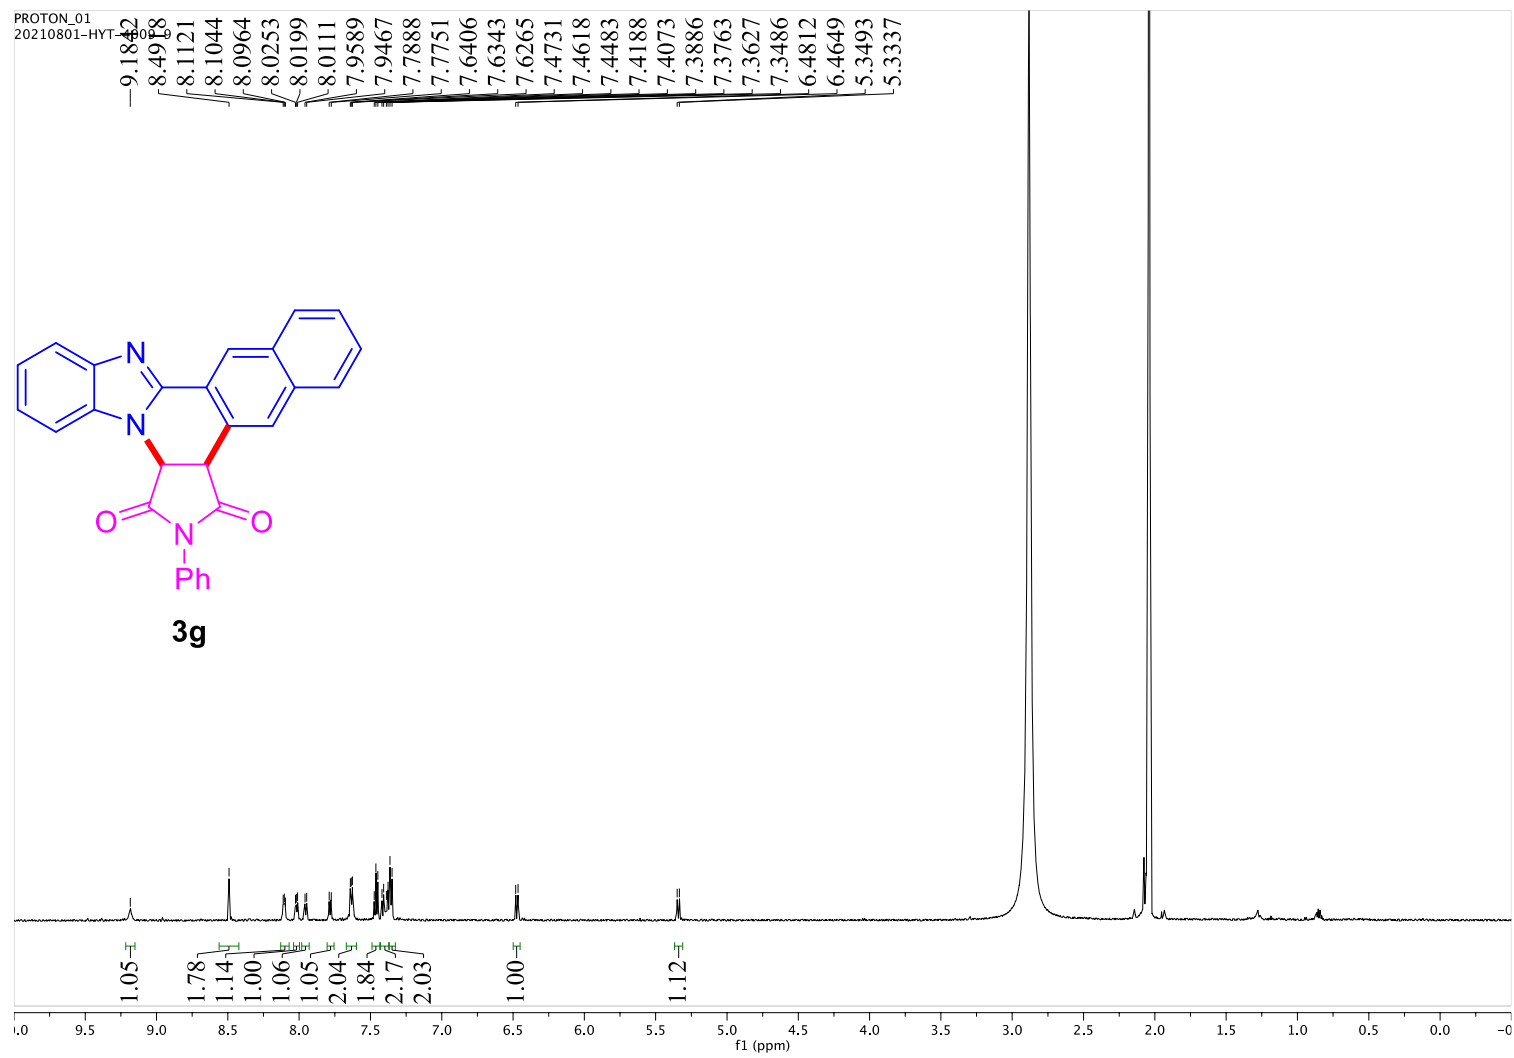

$^1\text{H}$  NMR spectrum (400 MHz) of compound **3g** in  $\text{DMSO-}d_6$ .

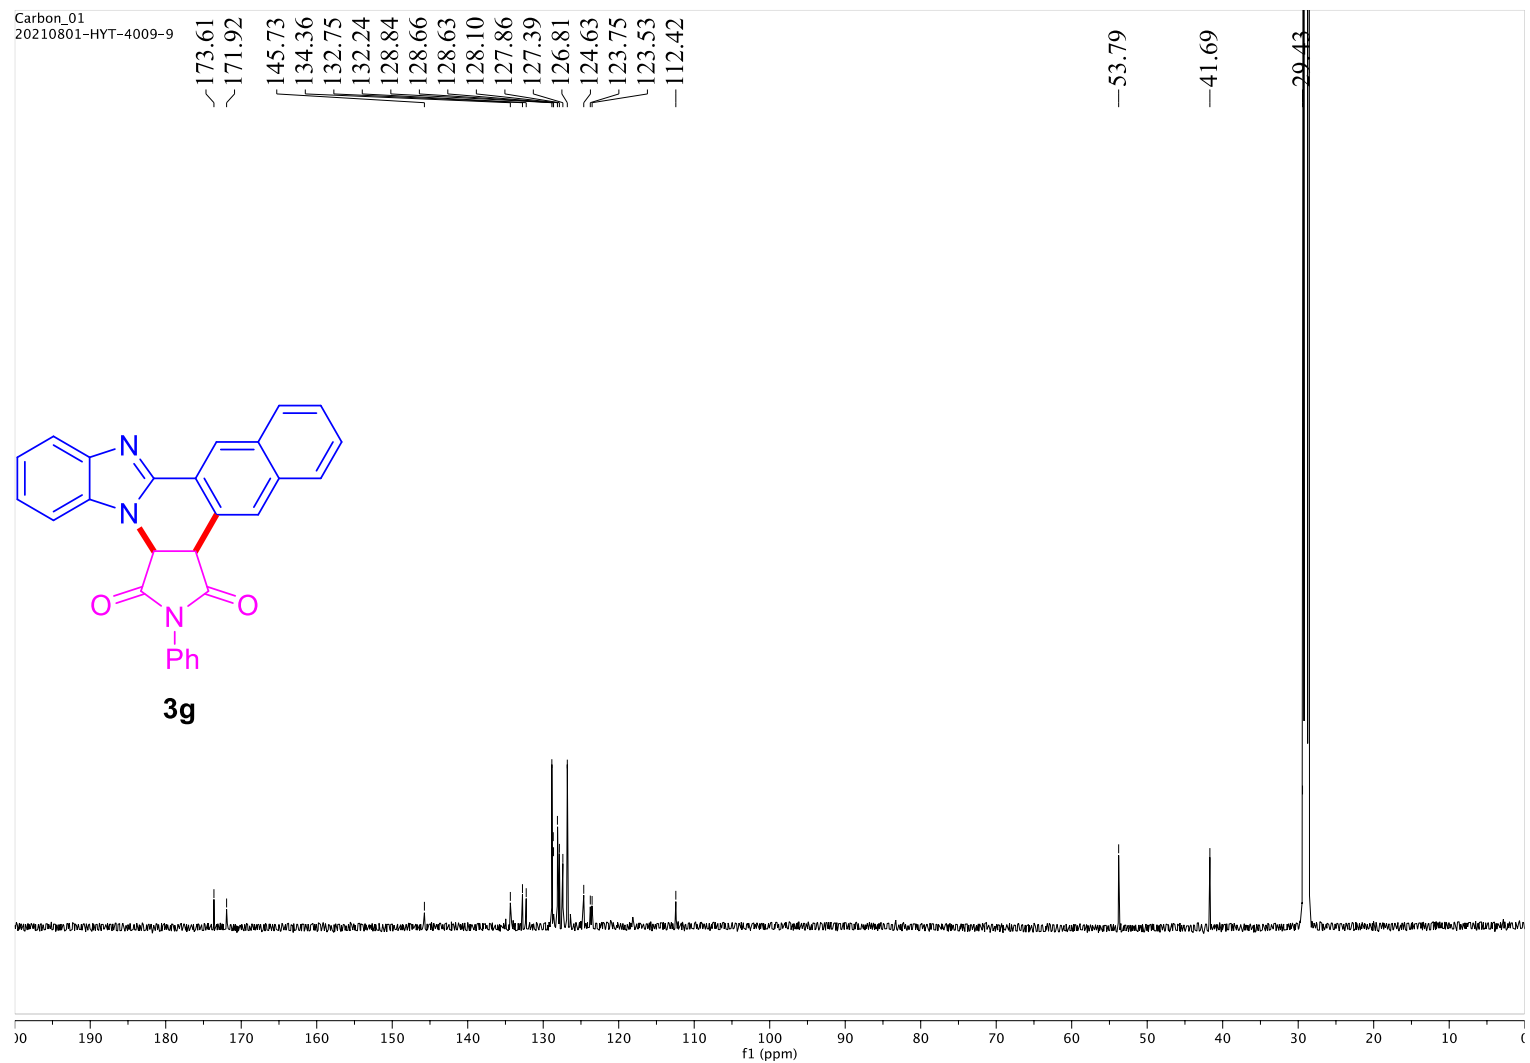

$^{13}\text{C}$  NMR spectrum (100 MHz) of compound **3g** in  $\text{DMSO-}d_6$ .



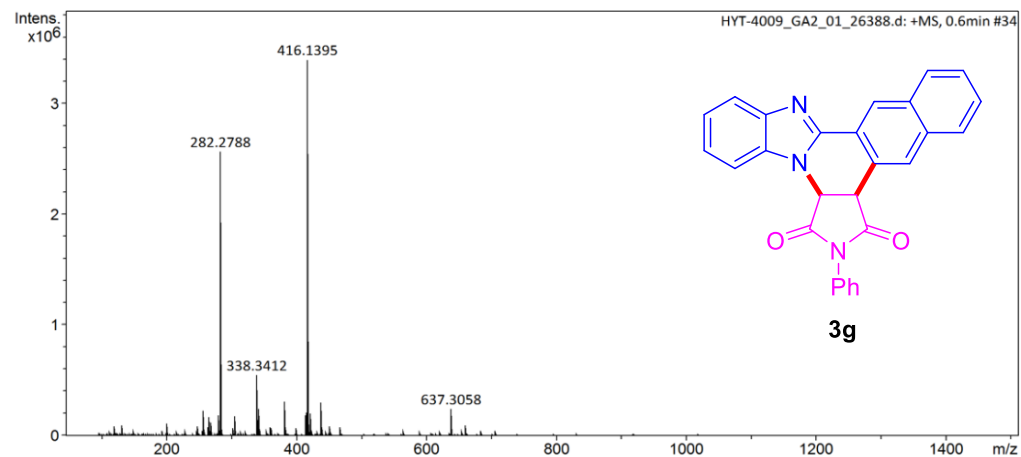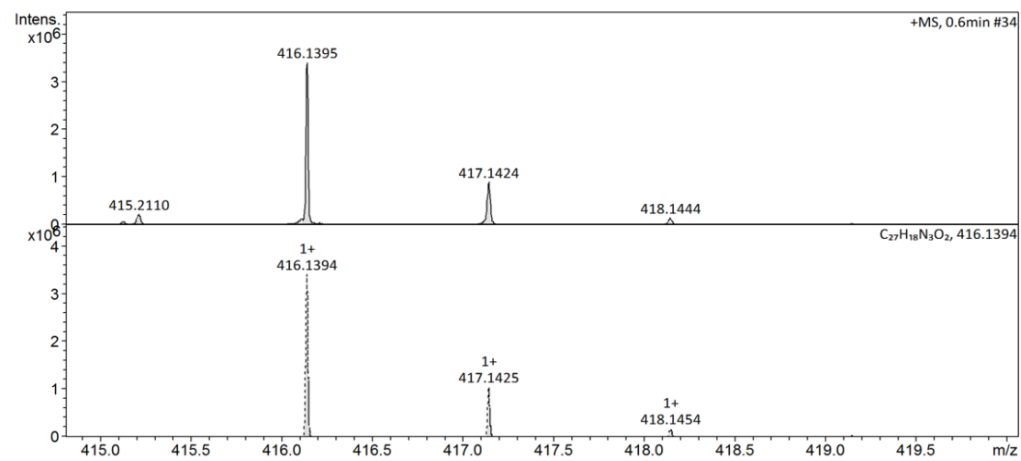

## Display Report

| Meas. m/z | # | Ion Formula                                                   | m/z      | err [ppm] | mSigma | # Sigma | Score  | rdb  | e <sup>-</sup> Conf | N-Rule | Adduct |
|-----------|---|---------------------------------------------------------------|----------|-----------|--------|---------|--------|------|---------------------|--------|--------|
| 416.1395  | 1 | C <sub>27</sub> H <sub>18</sub> N <sub>3</sub> O <sub>2</sub> | 416.1394 | 0.3       | 23.6   | 1       | 100.00 | 20.5 | even                | ok     | M      |

HRMS (ESI) of compound **3g**.

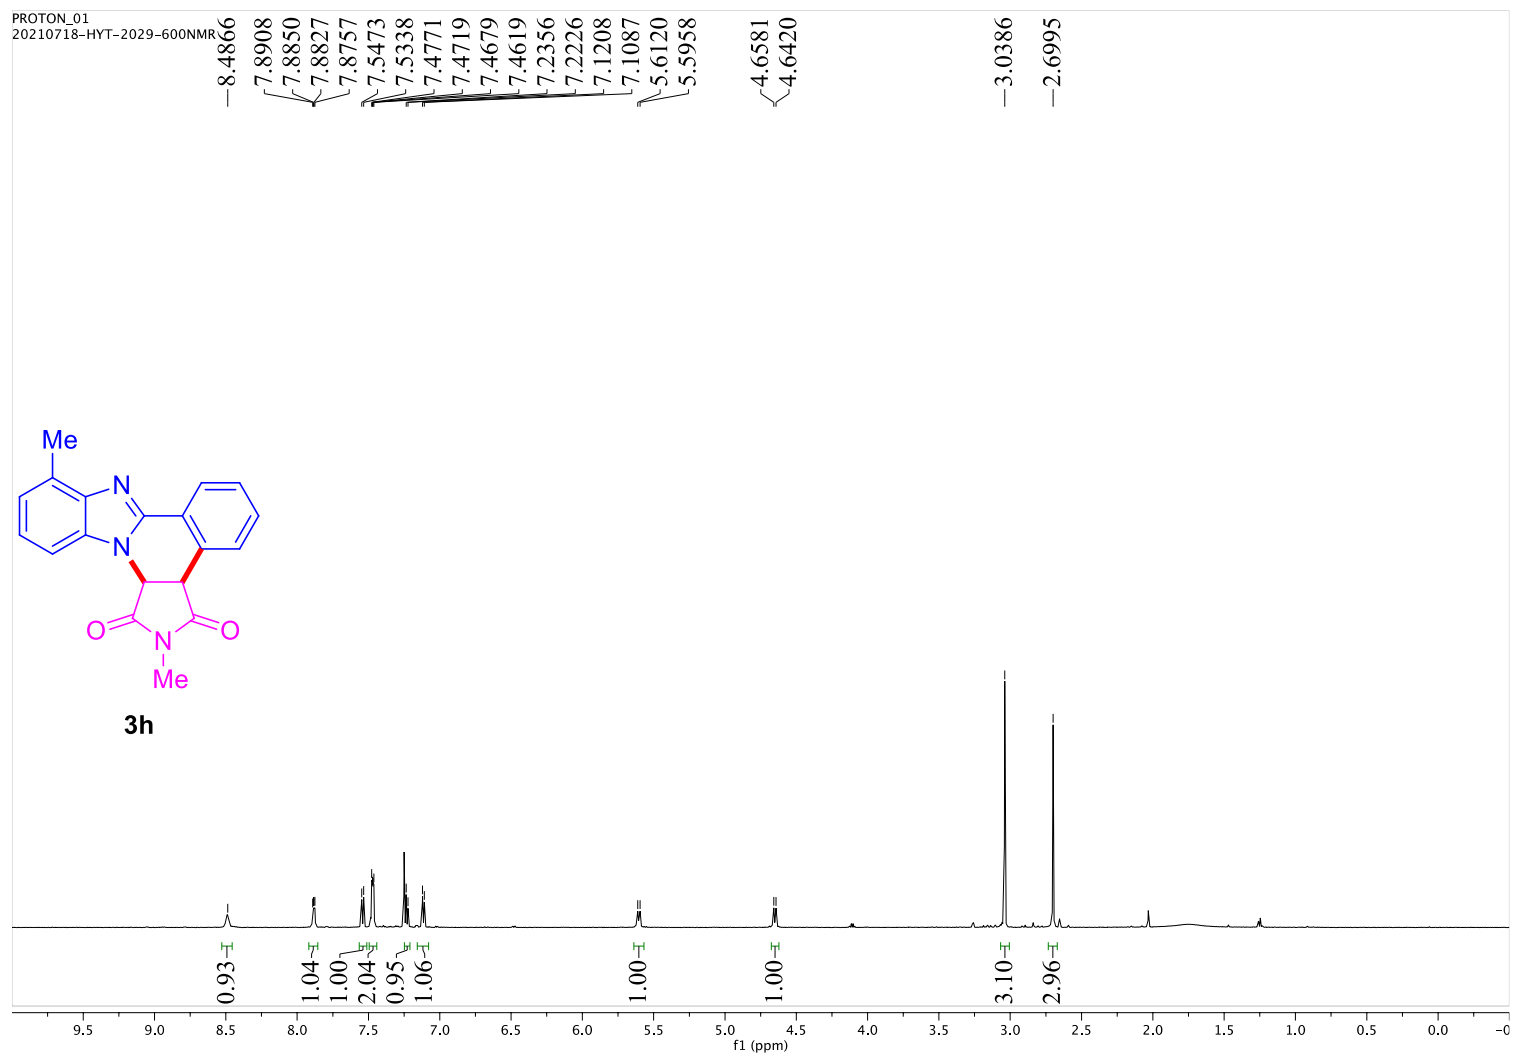

$^1\text{H}$  NMR spectrum (600 MHz) of compound **3h** in  $\text{CDCl}_3$ .

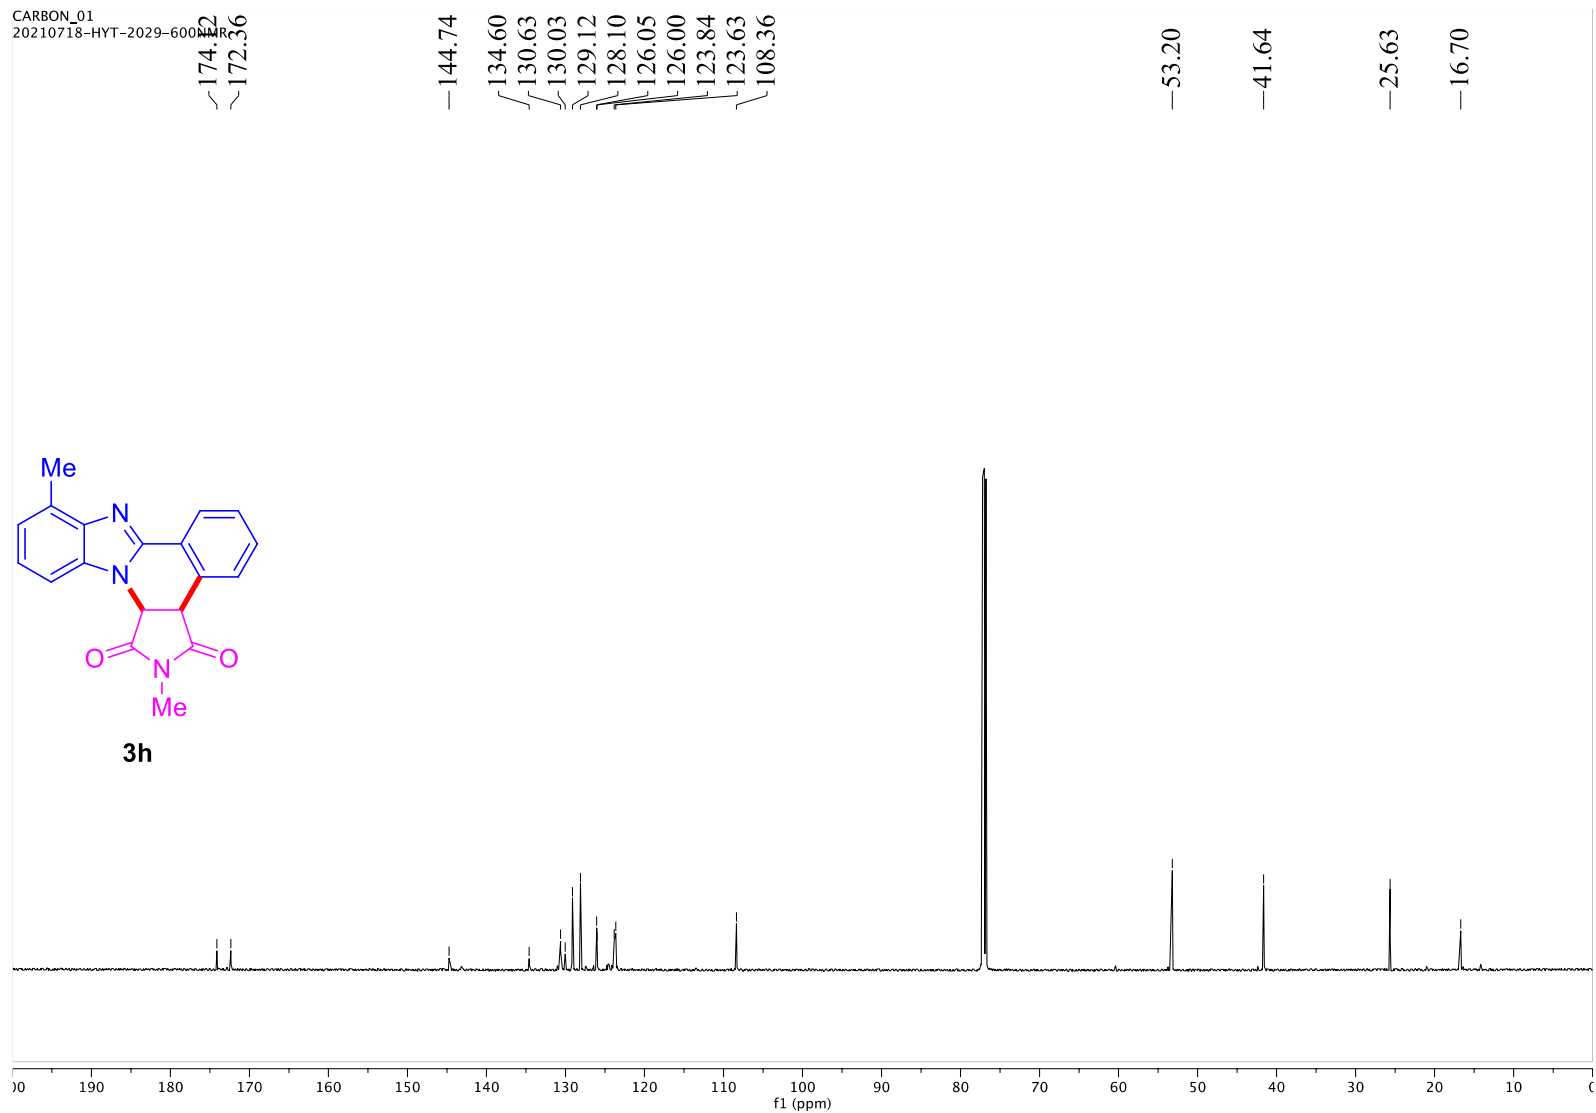

$^{13}\text{C}$  NMR spectrum (150 MHz) of compound **3h** in  $\text{CDCl}_3$ .

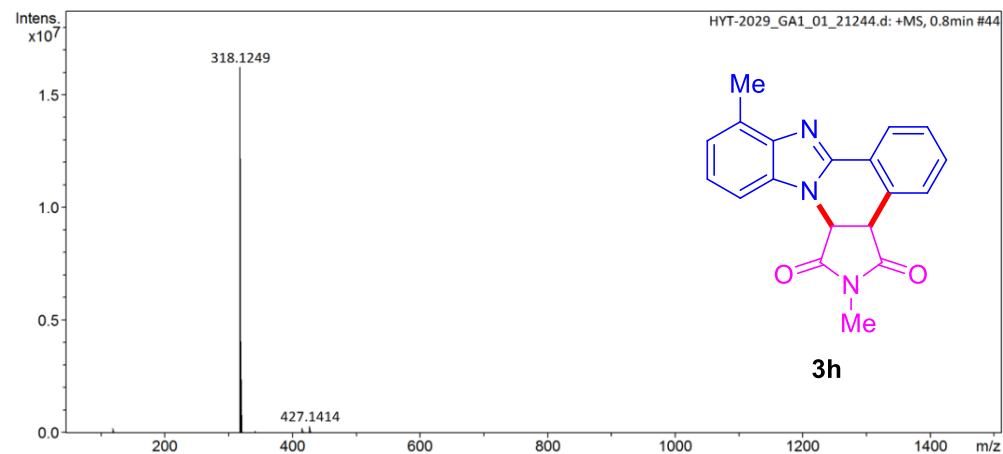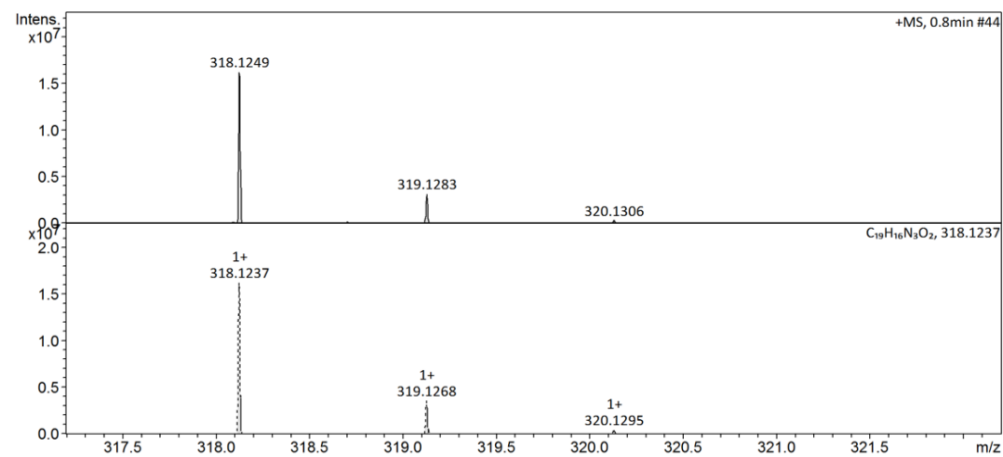

## Display Report

| Meas. m/z | # | Ion Formula                                                   | m/z      | err [ppm] | mSigma | # Sigma | Score  | rdb  | e <sup>-</sup> Conf | N-Rule | Adduct |
|-----------|---|---------------------------------------------------------------|----------|-----------|--------|---------|--------|------|---------------------|--------|--------|
| 318.1249  | 1 | C <sub>19</sub> H <sub>16</sub> N <sub>3</sub> O <sub>2</sub> | 318.1237 | 3.9       | 15.1   | 1       | 100.00 | 13.5 | even                | ok     | M+H    |

HRMS (ESI) of compound **3h**.

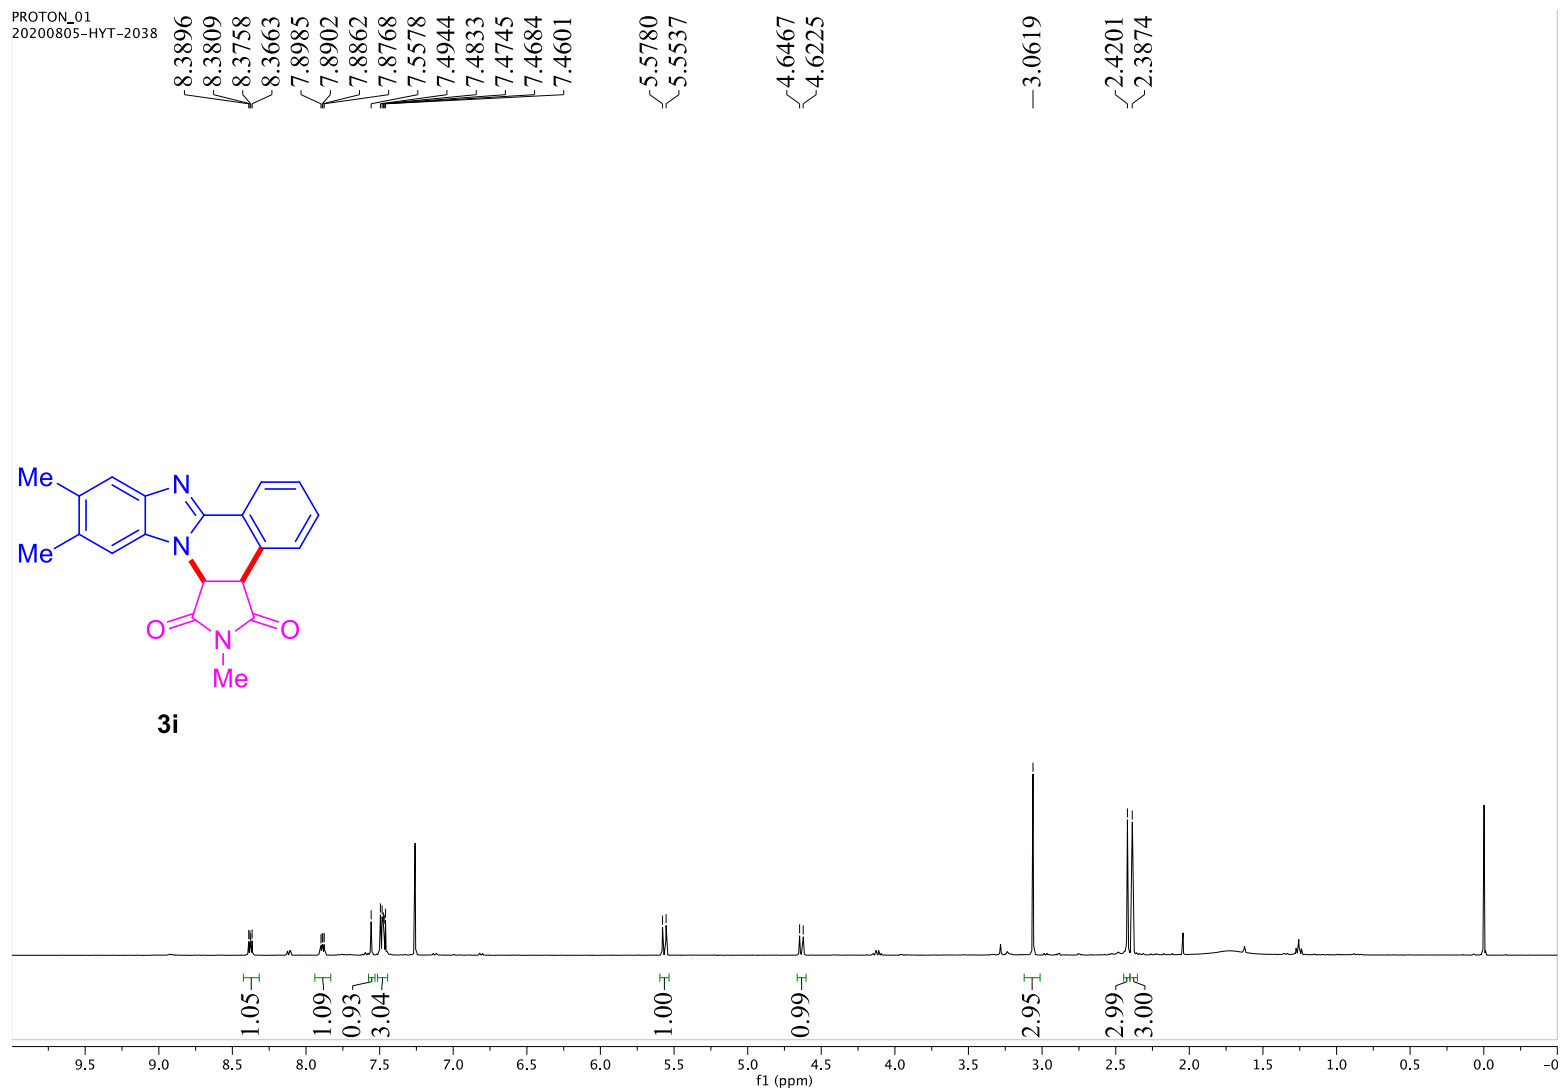

$^1\text{H}$  NMR spectrum (400 MHz) of compound **3i** in  $\text{CDCl}_3$ .

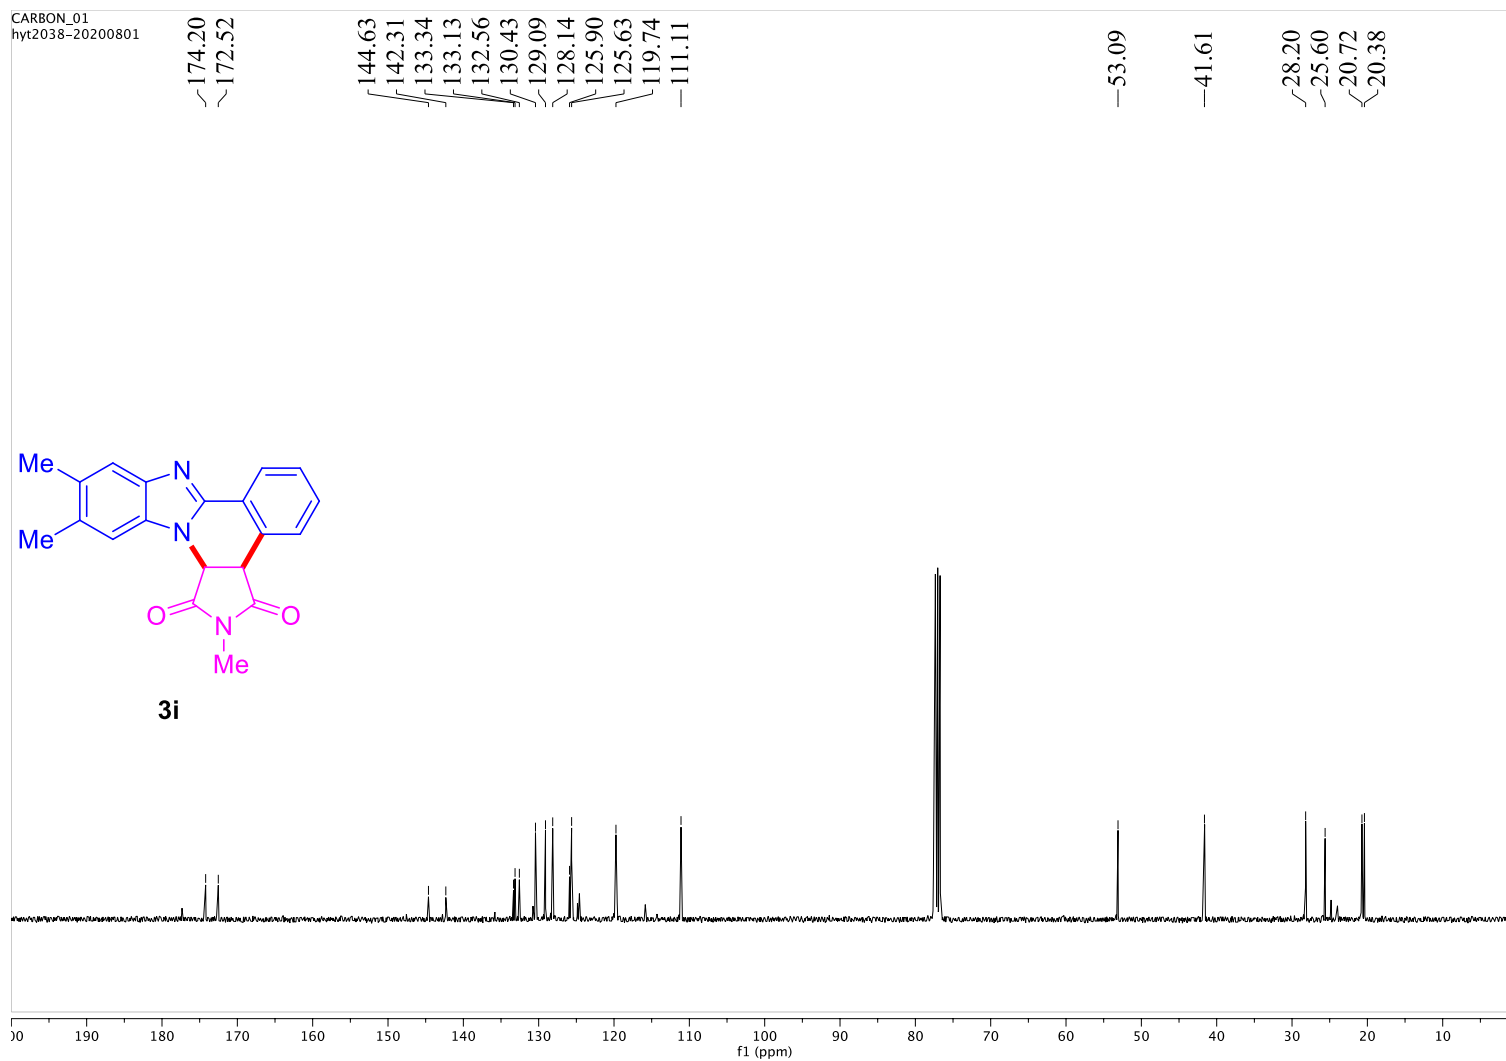

$^{13}\text{C}$  NMR spectrum (100 MHz) of compound **3i** in  $\text{CDCl}_3$ .

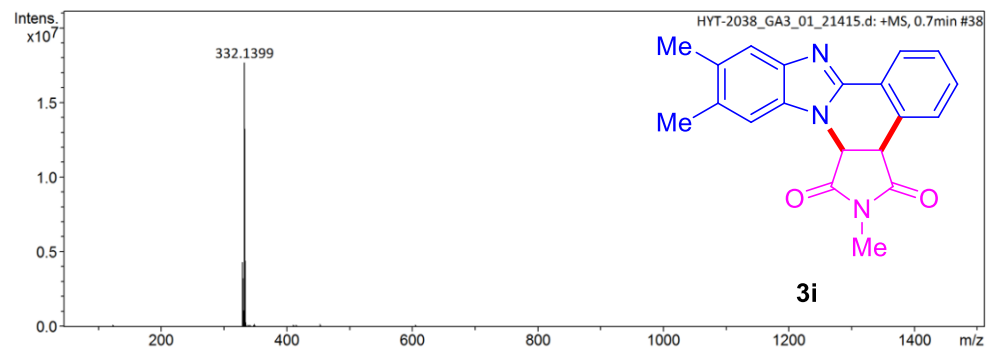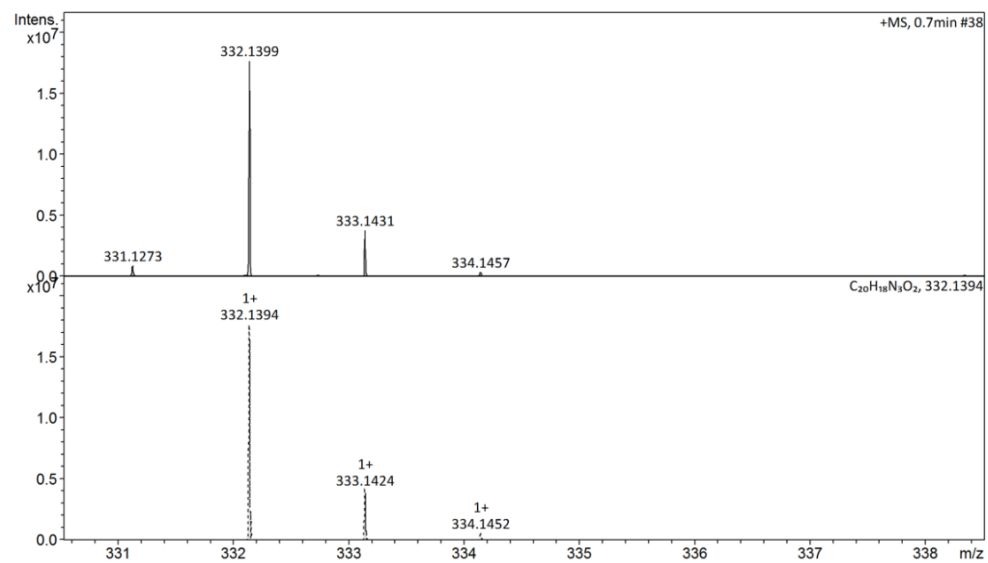

## Display Report

| Meas. m/z | # | Ion Formula                                                   | m/z      | err [ppm] | mSigma | # Sigma | Score  | rdb  | e <sup>-</sup> Conf | N-Rule | Adduct |
|-----------|---|---------------------------------------------------------------|----------|-----------|--------|---------|--------|------|---------------------|--------|--------|
| 332.1399  | 1 | C <sub>20</sub> H <sub>18</sub> N <sub>4</sub> O <sub>2</sub> | 332.1394 | -1.7      | 11.3   | 1       | 100.00 | 13.5 | even                | ok     | M+H    |

HRMS (ESI) of compound **3i**.

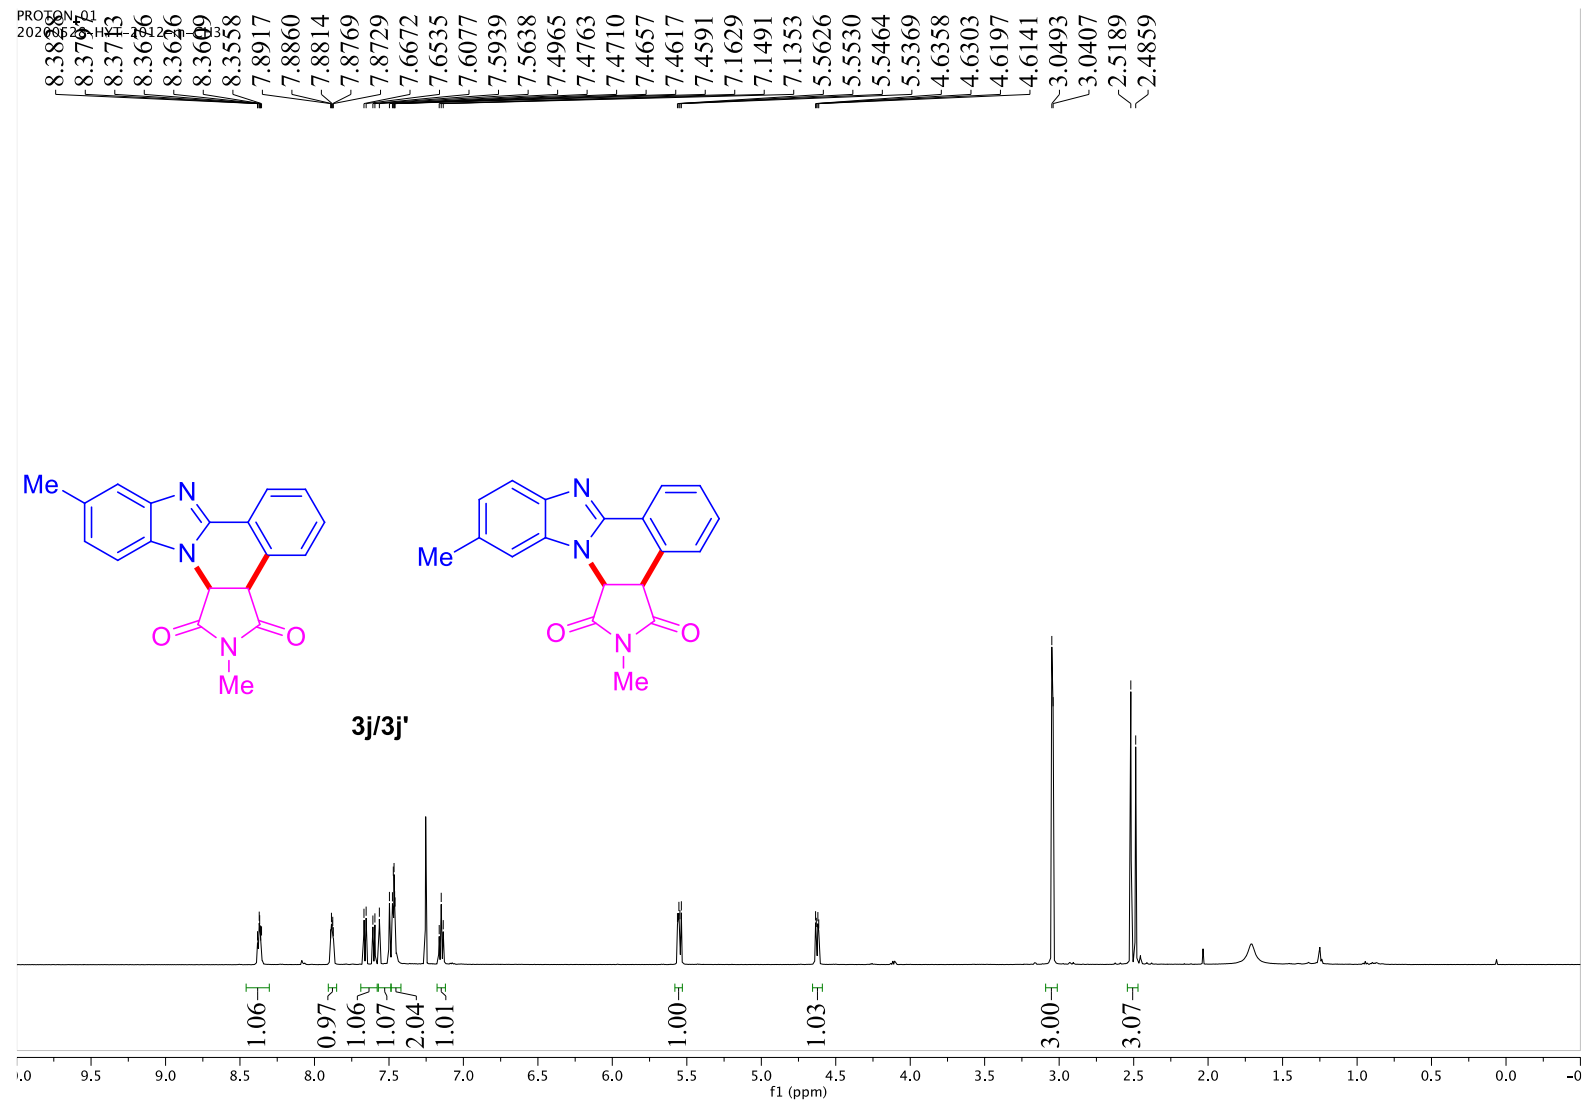

$^1\text{H}$  NMR spectrum (400 MHz) of compound **3j/3j'** in  $\text{CDCl}_3$ .



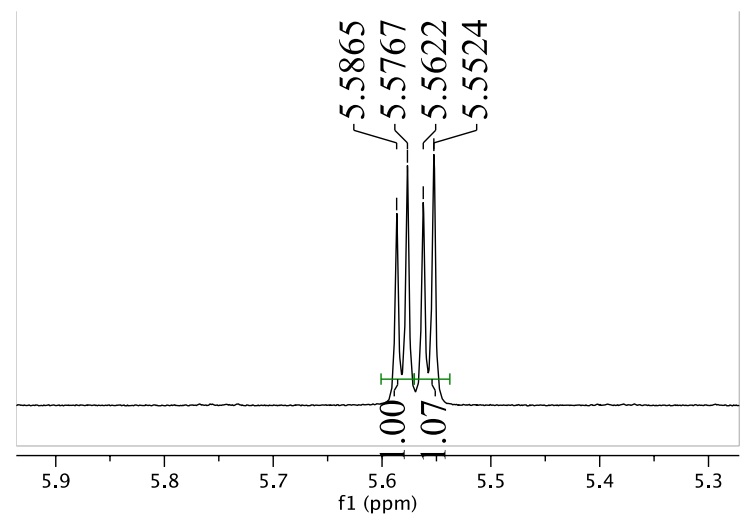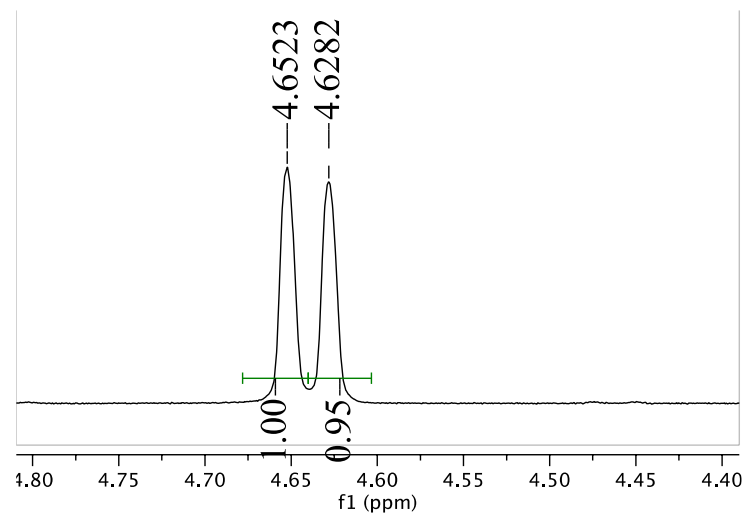

<sup>1</sup>H NMR spectrum (400 MHz) of compound **3j/3j'** in CDCl<sub>3</sub>.

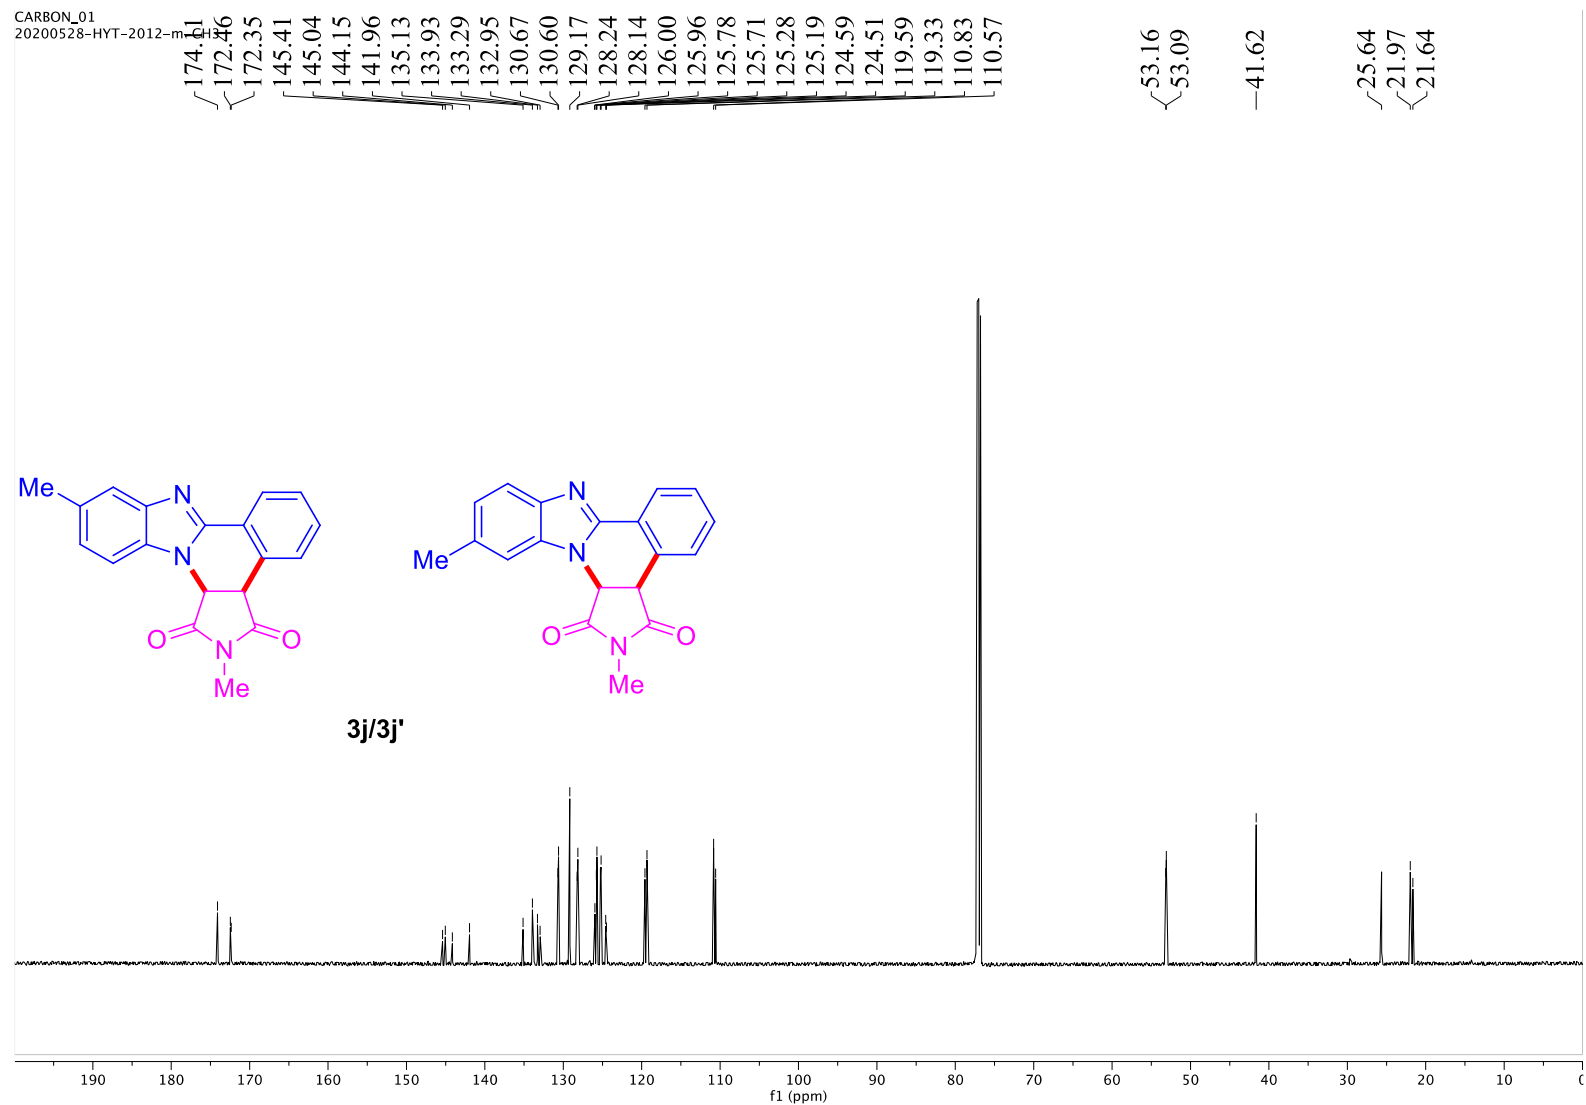

$^{13}\text{C}$  NMR spectrum (100 MHz) of compound **3j/3j'** in  $\text{CDCl}_3$ .

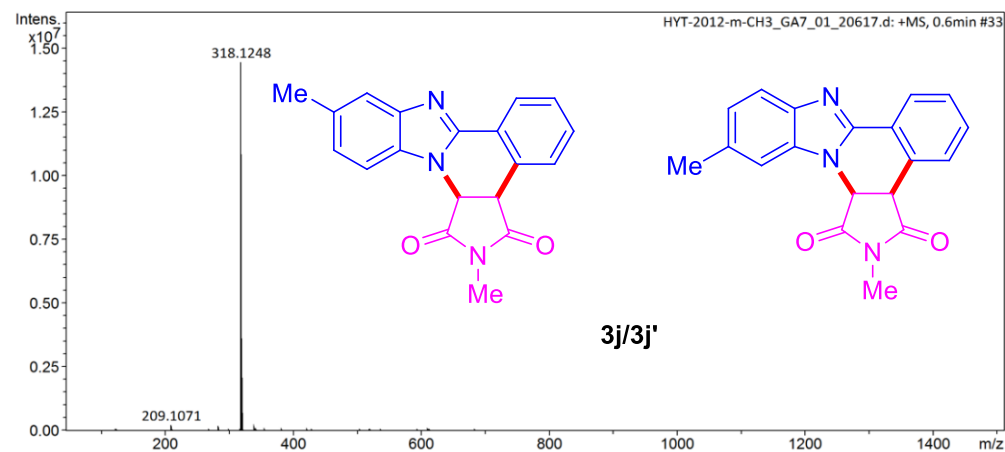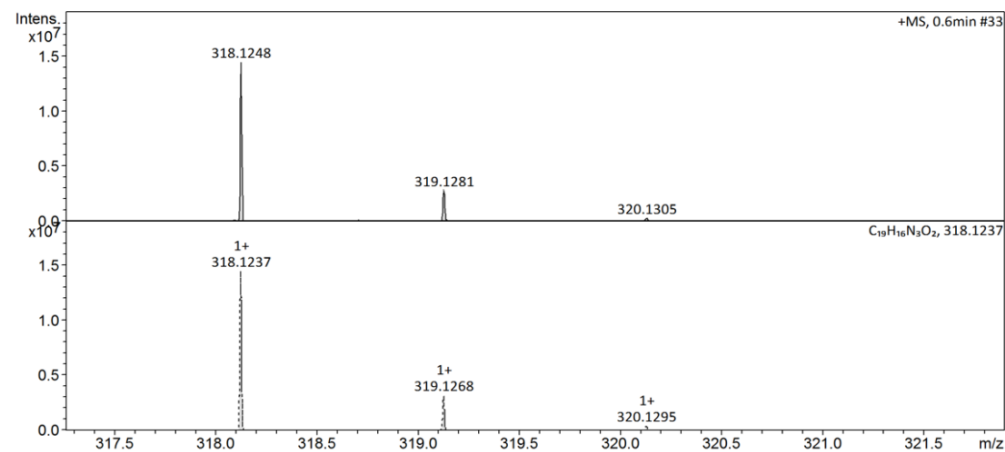

## Display Report

| Meas. m/z | # | Ion Formula                                                   | m/z      | err [ppm] | mSigma | # Sigma | Score  | rdb  | e <sup>-</sup> Conf | N-Rule | Adduct |
|-----------|---|---------------------------------------------------------------|----------|-----------|--------|---------|--------|------|---------------------|--------|--------|
| 318.1248  | 1 | C <sub>19</sub> H <sub>16</sub> N <sub>3</sub> O <sub>2</sub> | 318.1237 | 3.3       | 17.2   | 1       | 100.00 | 13.5 | even                | ok     | M+H    |

HRMS (ESI) of compound **3j/3j'**.

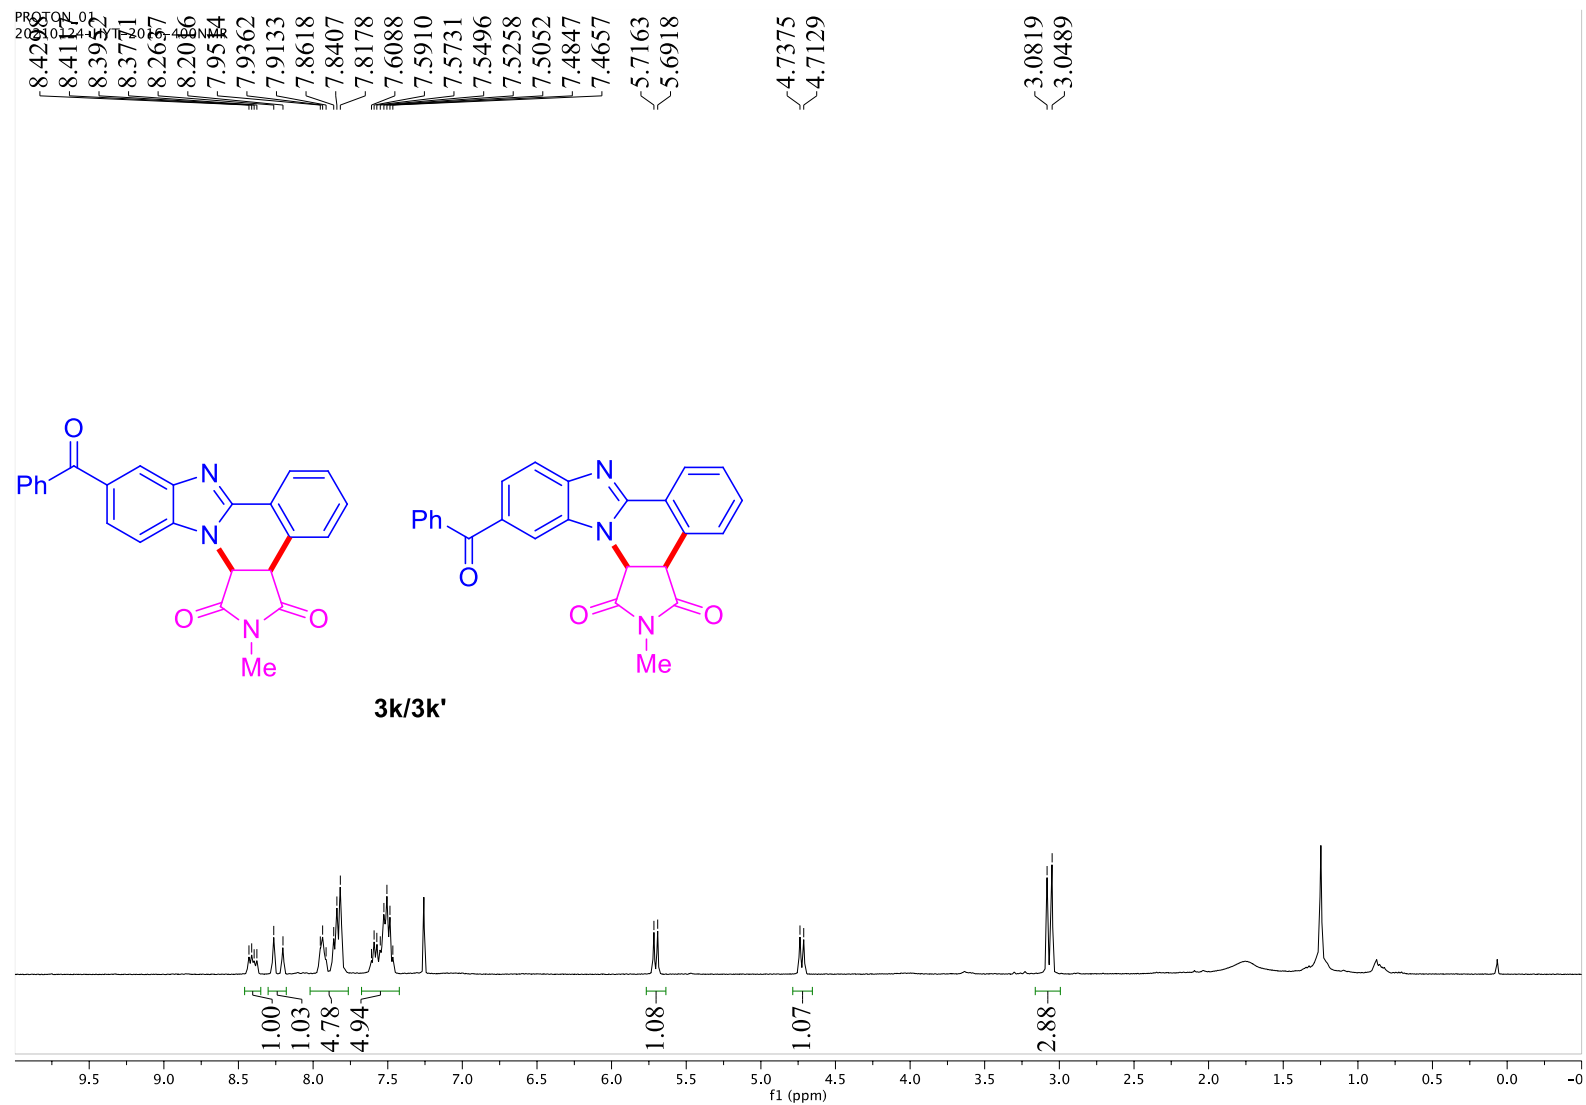

$^1\text{H}$  NMR spectrum (400 MHz) of compound **3k/3k'** in  $\text{CDCl}_3$ .

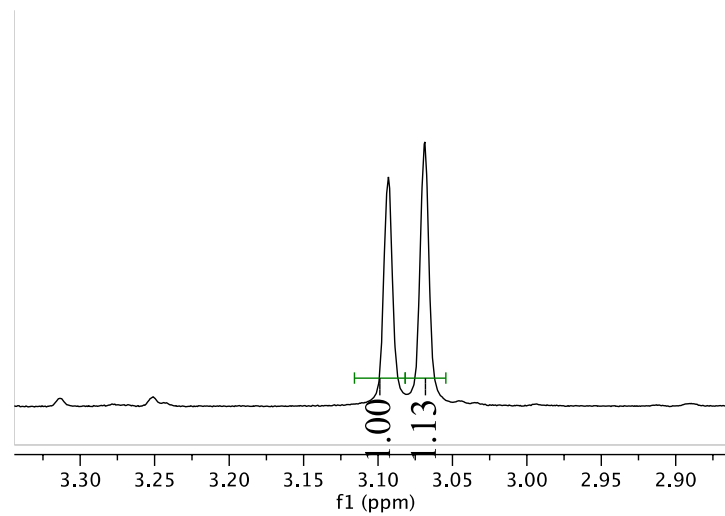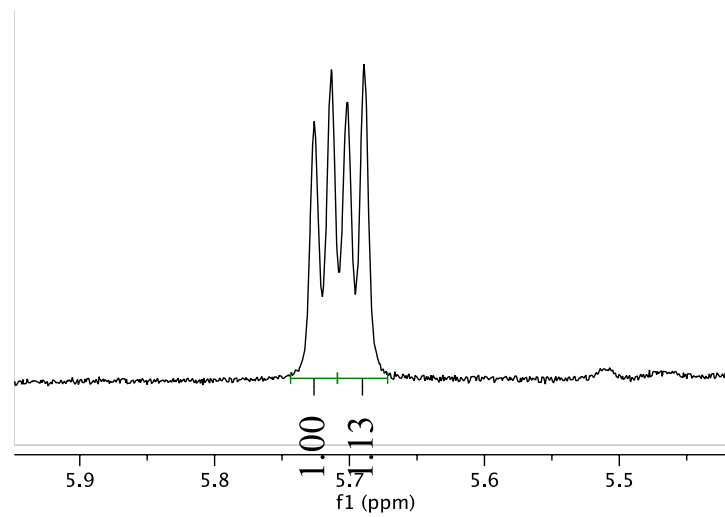

<sup>1</sup>H NMR spectrum (400 MHz) of compound **3k/3k'** in CDCl<sub>3</sub>.

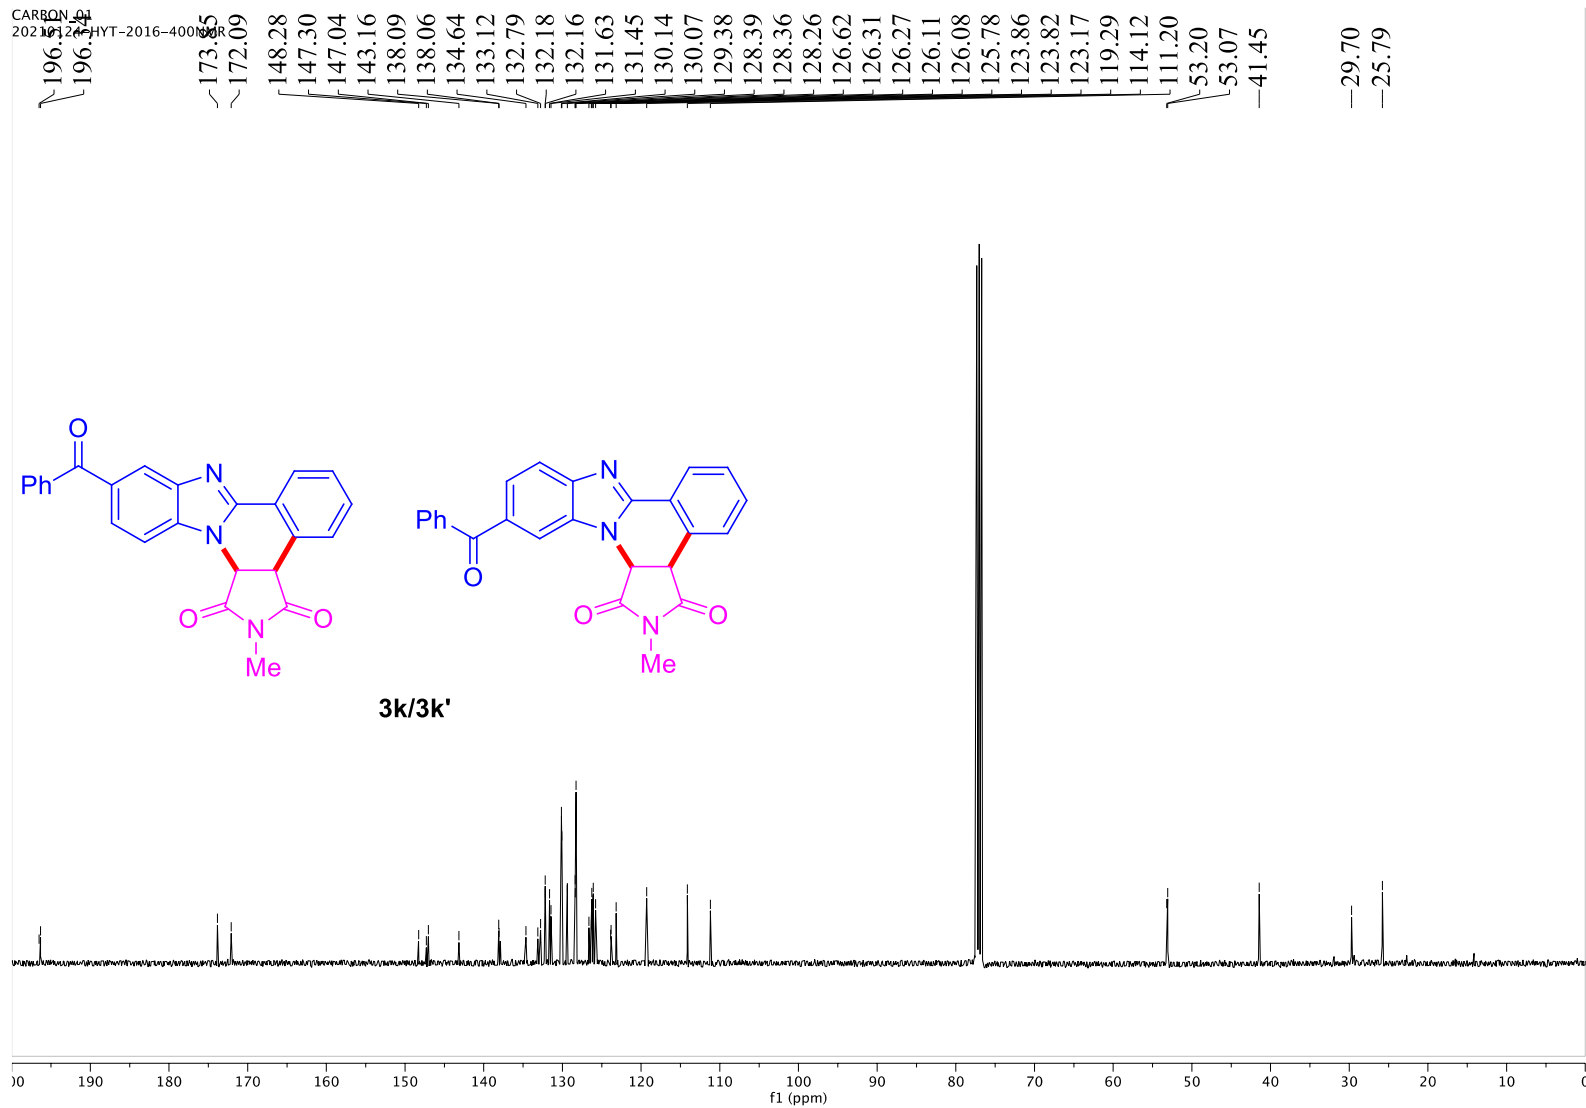

$^{13}\text{C}$  NMR spectrum (100 MHz) of compound **3k/3k'** in  $\text{CDCl}_3$ .

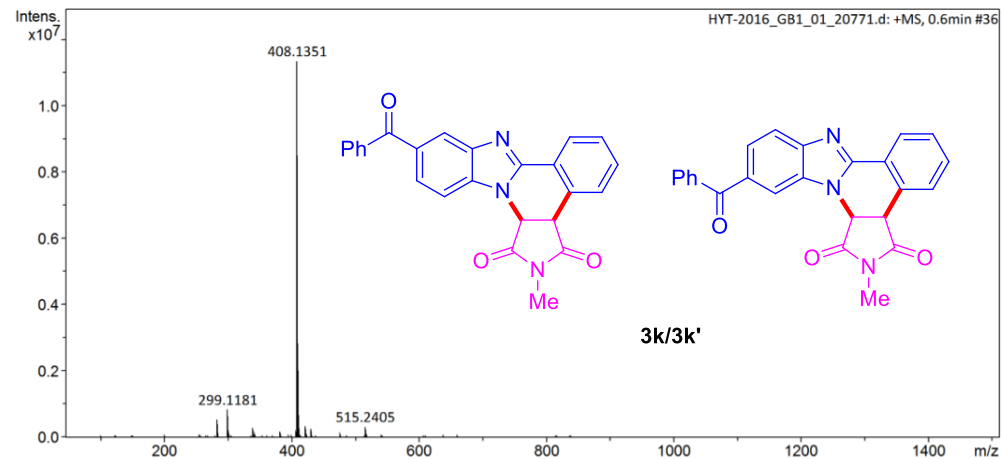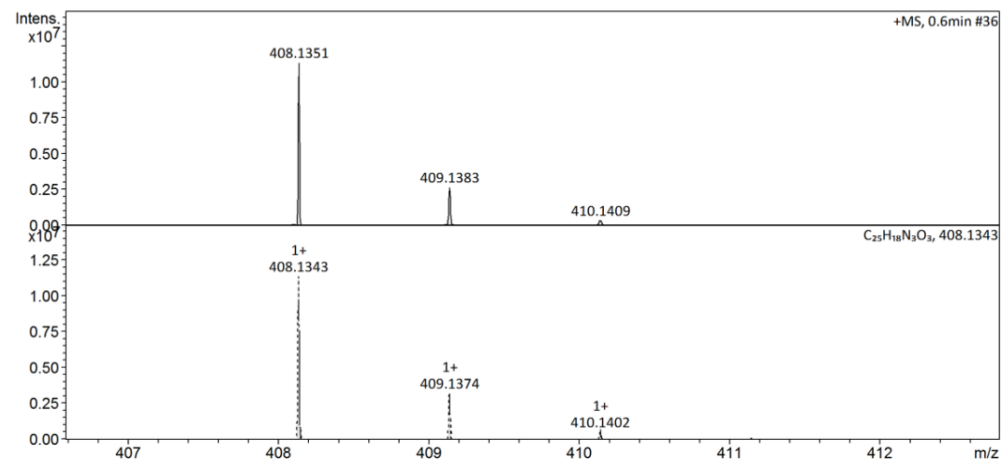

## Display Report

| Meas. m/z | # | Ion Formula                                                   | m/z      | err [ppm] | mSigma | # Sigma | Score  | rdb  | e <sup>-</sup> Conf | N-Rule | Adduct |
|-----------|---|---------------------------------------------------------------|----------|-----------|--------|---------|--------|------|---------------------|--------|--------|
| 408.1351  | 1 | C <sub>25</sub> H <sub>18</sub> N <sub>3</sub> O <sub>3</sub> | 408.1343 | -2.1      | 25.2   | 1       | 100.00 | 18.5 | even                | ok     | M+H    |

HRMS (ESI) of compound **3k/3k'**.

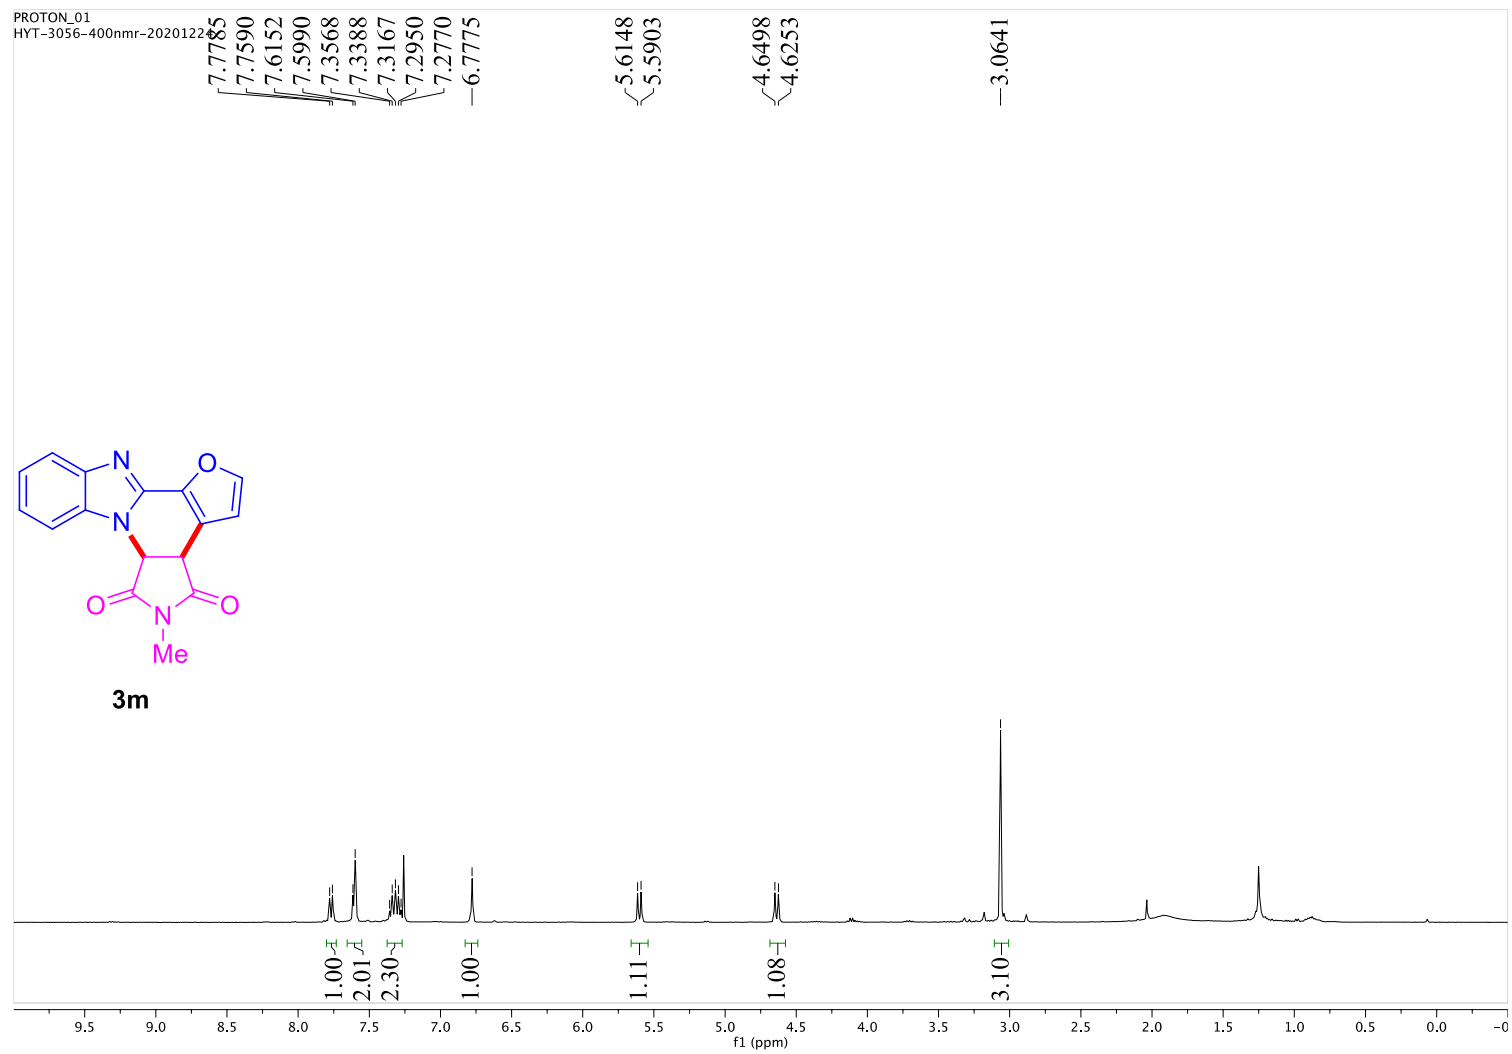

$^1\text{H}$  NMR spectrum (400 MHz) of compound **3m** in  $\text{CDCl}_3$ .



CARBON\_01  
HYT-3056-400nmr-202012

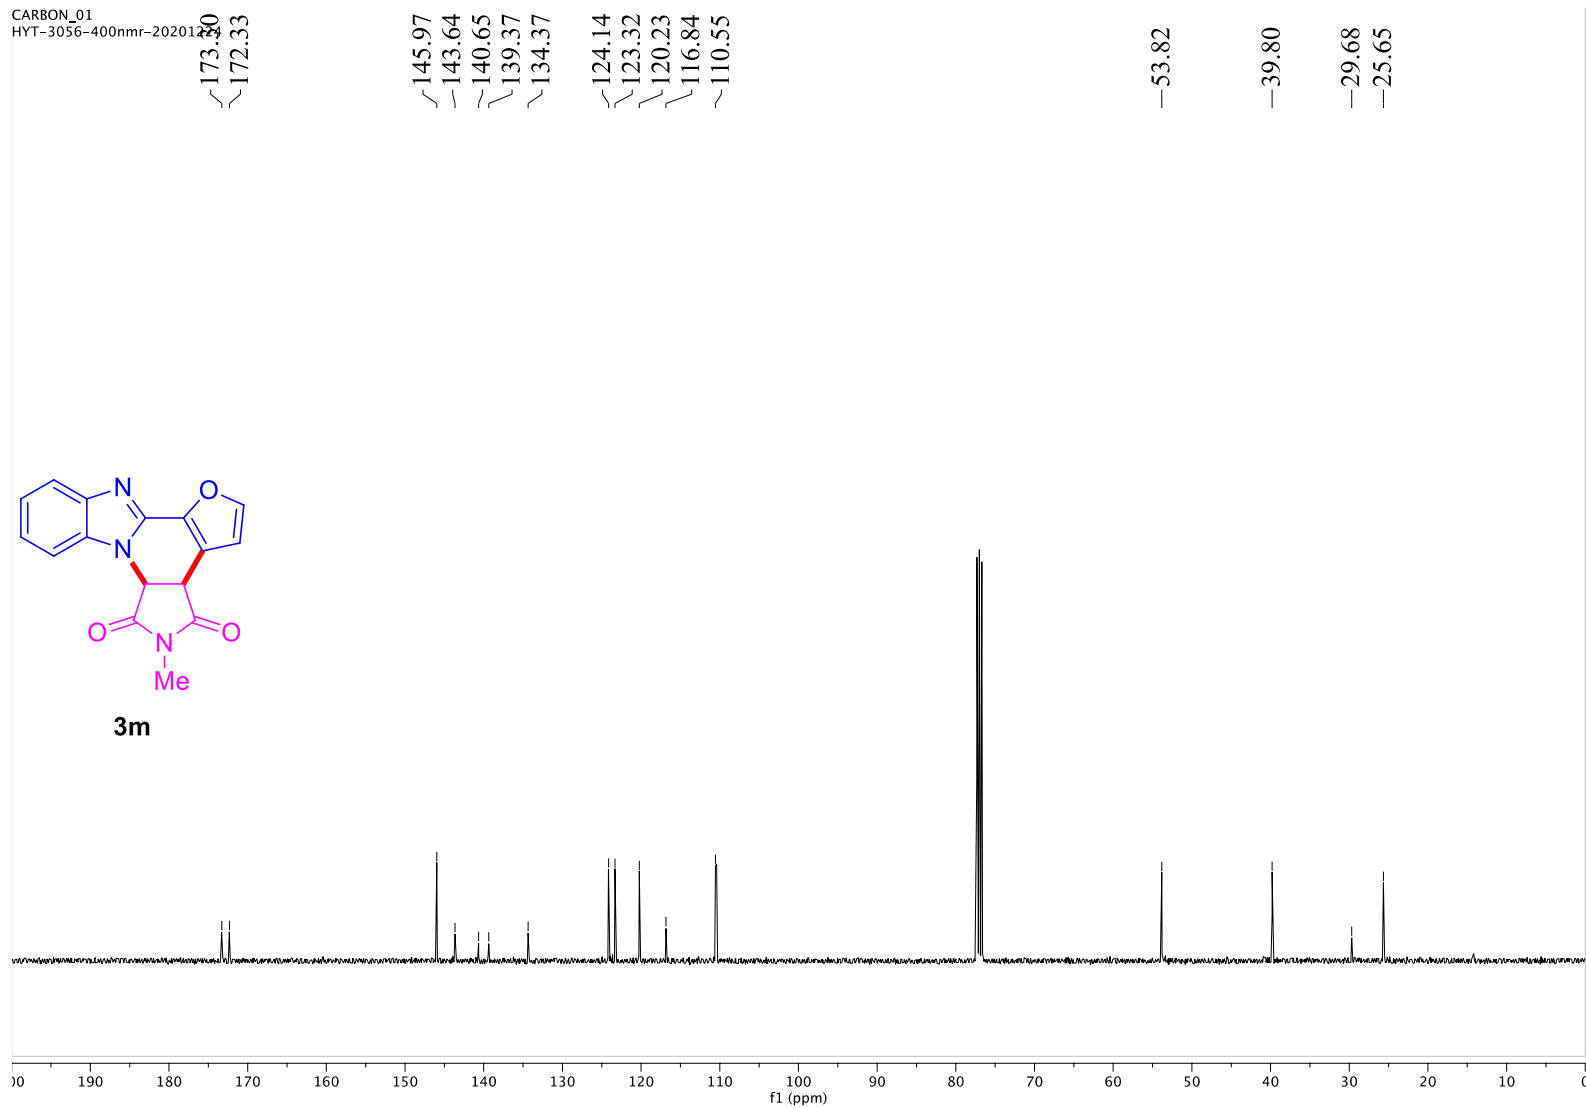

$^{13}\text{C}$  NMR spectrum (100 MHz) of compound **3m** in  $\text{CDCl}_3$ .

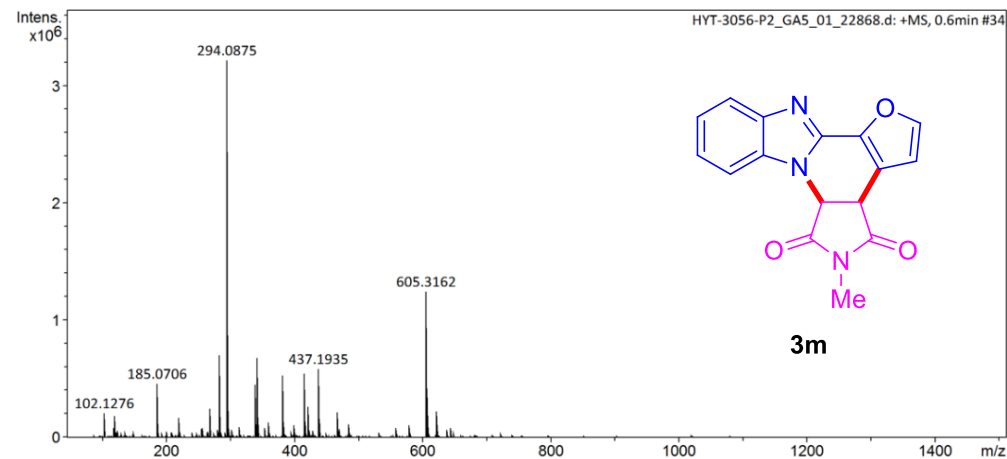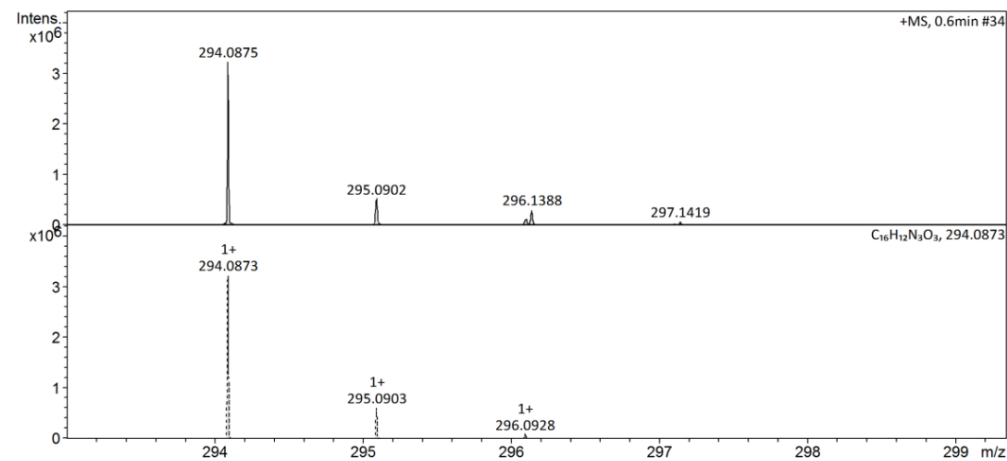

## Display Report

| Meas. m/z | # | Ion Formula                                                   | m/z      | err [ppm] | mSigma | # Sigma | Score  | rdb  | e <sup>-</sup> Conf | N-Rule | Adduct |
|-----------|---|---------------------------------------------------------------|----------|-----------|--------|---------|--------|------|---------------------|--------|--------|
| 294.0875  | 1 | C <sub>16</sub> H <sub>12</sub> N <sub>3</sub> O <sub>3</sub> | 294.0873 | 0.5       | 18.1   | 1       | 100.00 | 12.5 | even                | ok     | M+H    |

HRMS (ESI) of compound **3m**.

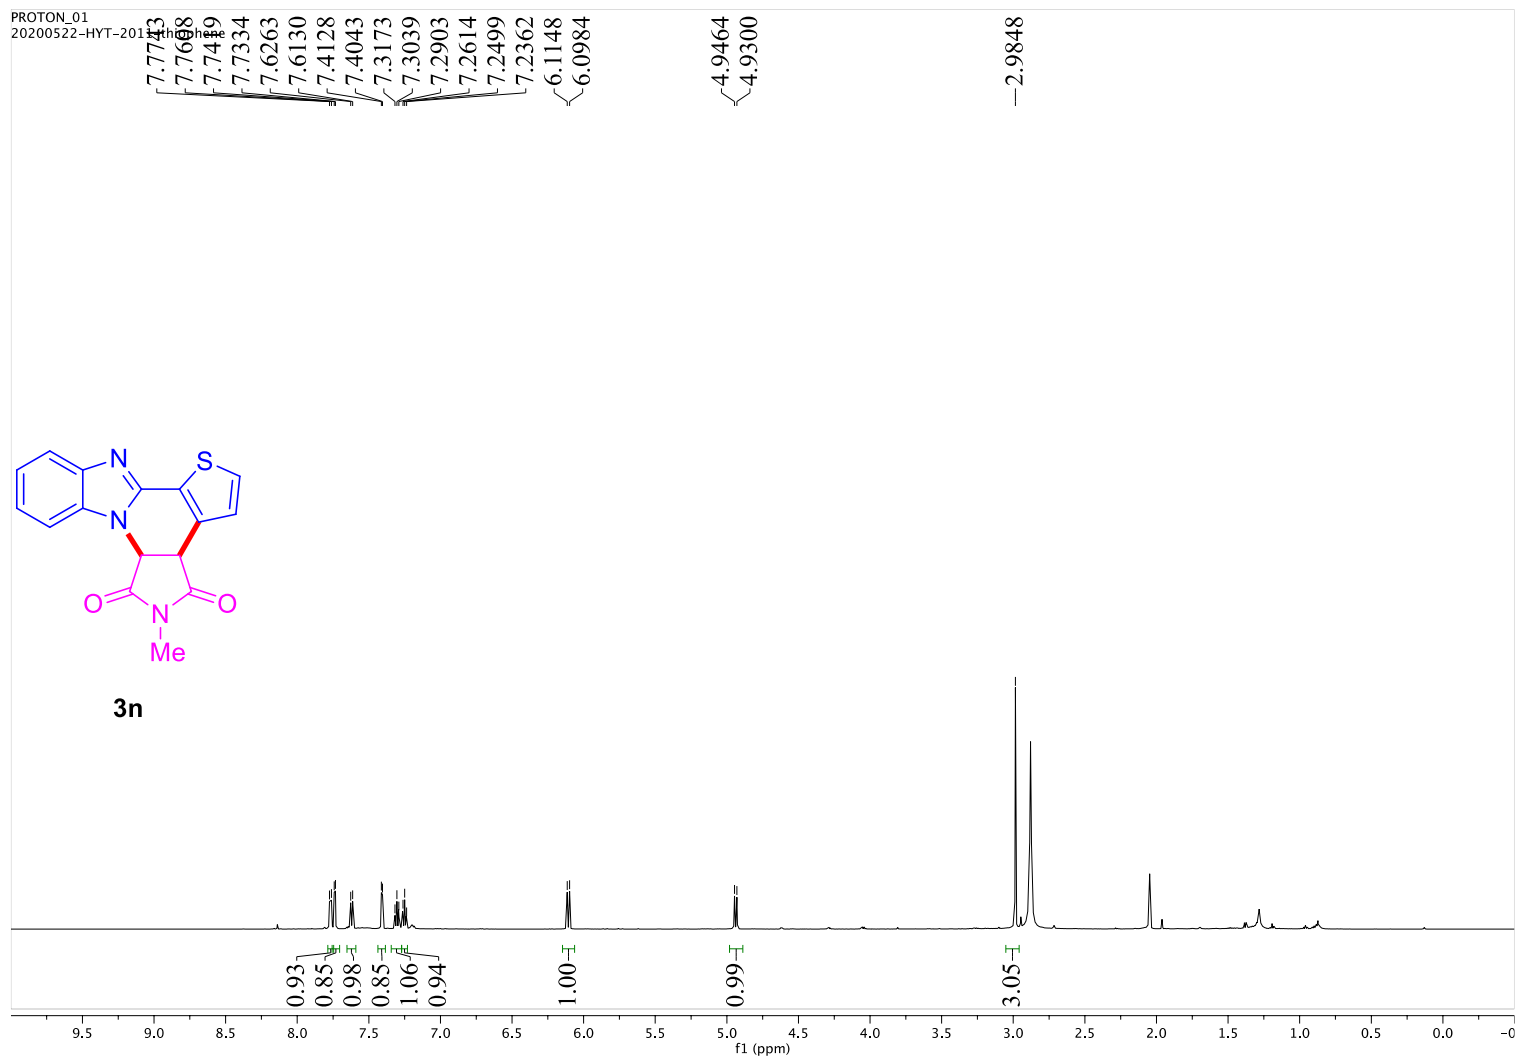

$^1\text{H}$  NMR spectrum (400 MHz) of compound **3n** in acetone- $d_6$ .

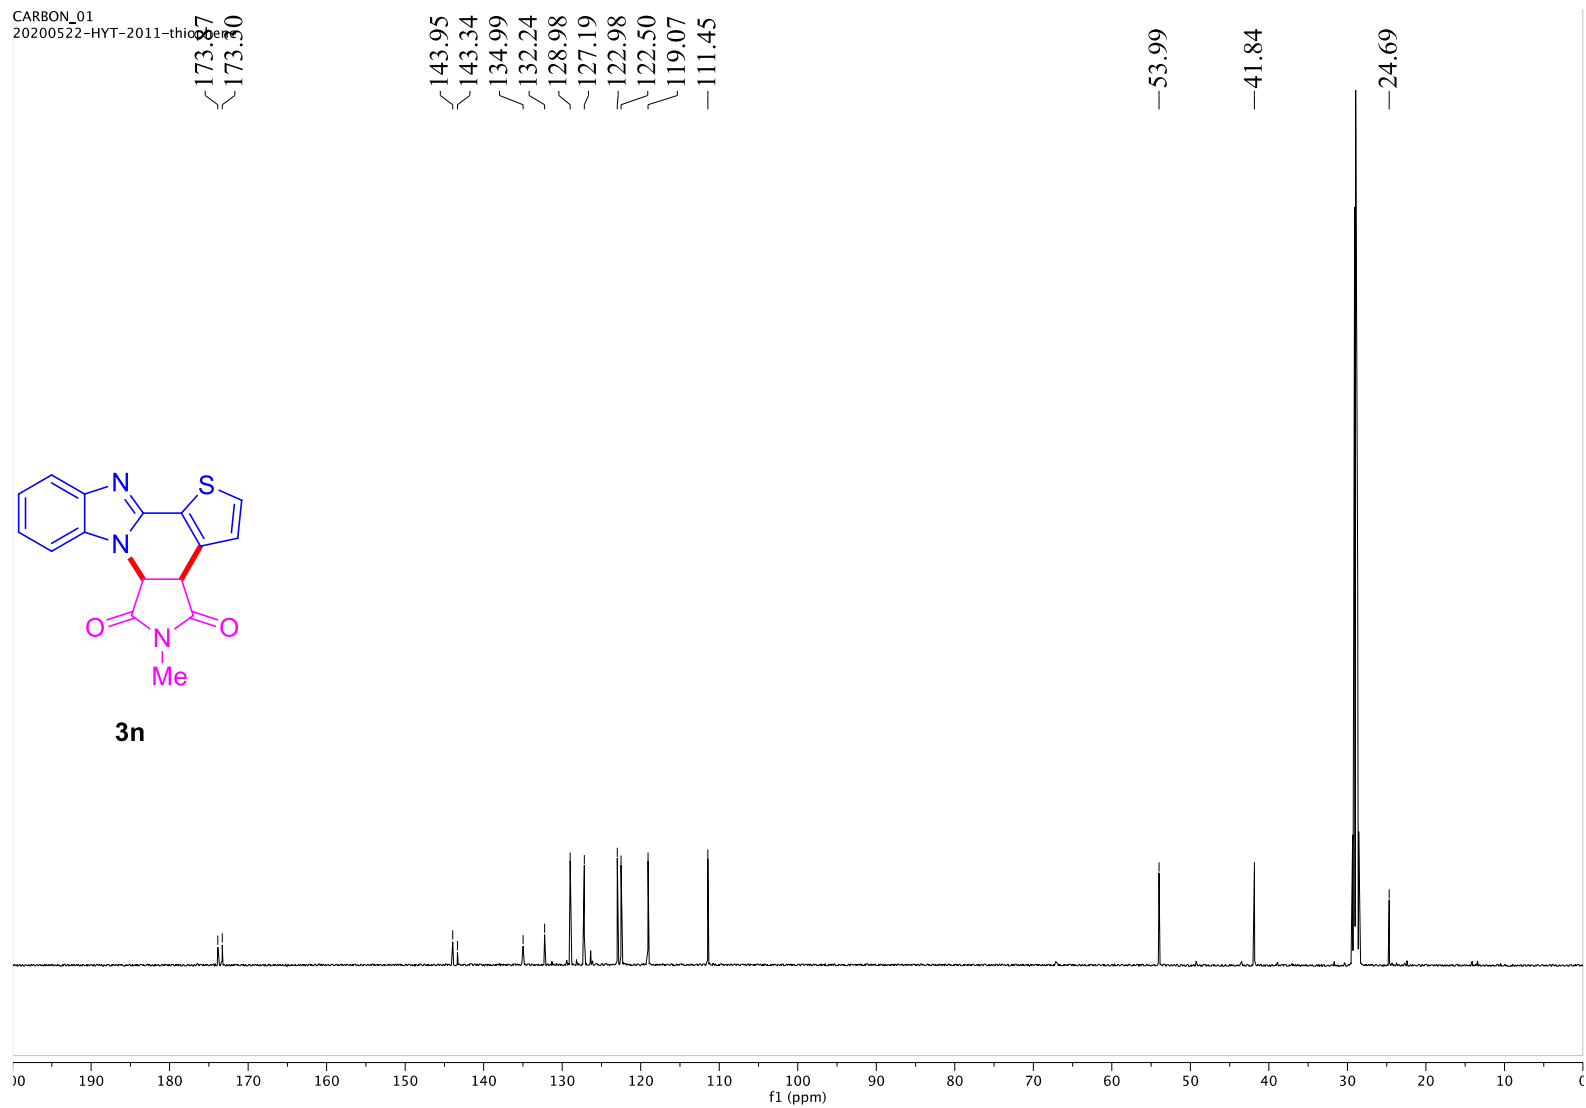

<sup>13</sup>C NMR spectrum (100 MHz) of compound **3n** in acetone-*d*<sub>6</sub>.

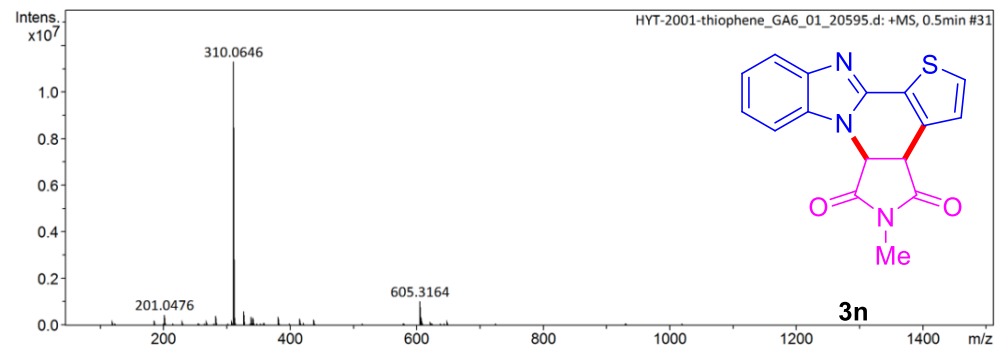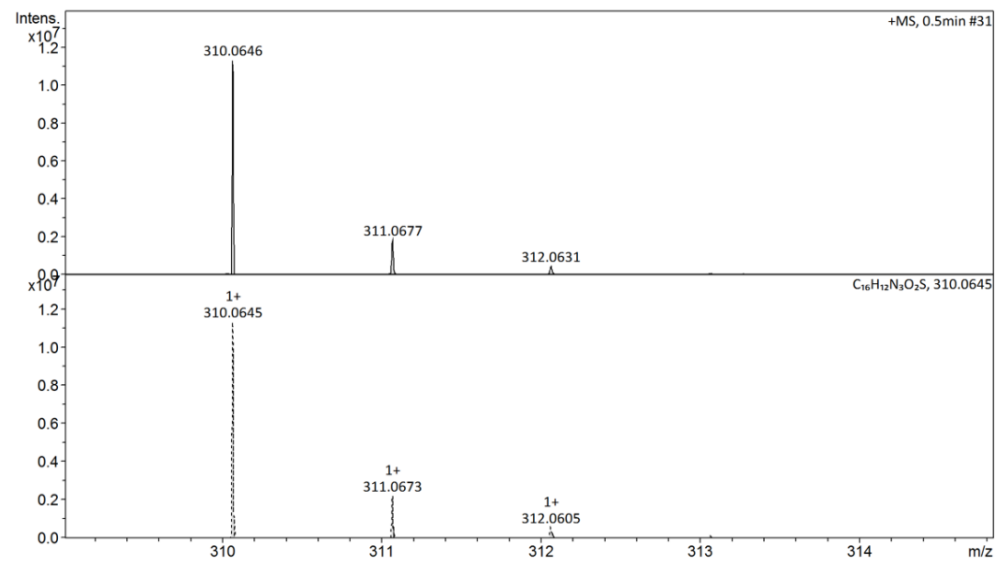

## Display Report

| Meas. m/z | # | Ion Formula                                                     | m/z      | err [ppm] | mSigma | # Sigma | Score  | rdb  | e <sup>-</sup> Conf | N-Rule | Adduct |
|-----------|---|-----------------------------------------------------------------|----------|-----------|--------|---------|--------|------|---------------------|--------|--------|
| 310.0646  | 1 | C <sub>16</sub> H <sub>12</sub> N <sub>3</sub> O <sub>2</sub> S | 310.0645 | 0.4       | 21.6   | 1       | 100.00 | 12.5 | even                | ok     | M+H    |

HRMS (ESI) of compound **3n**.

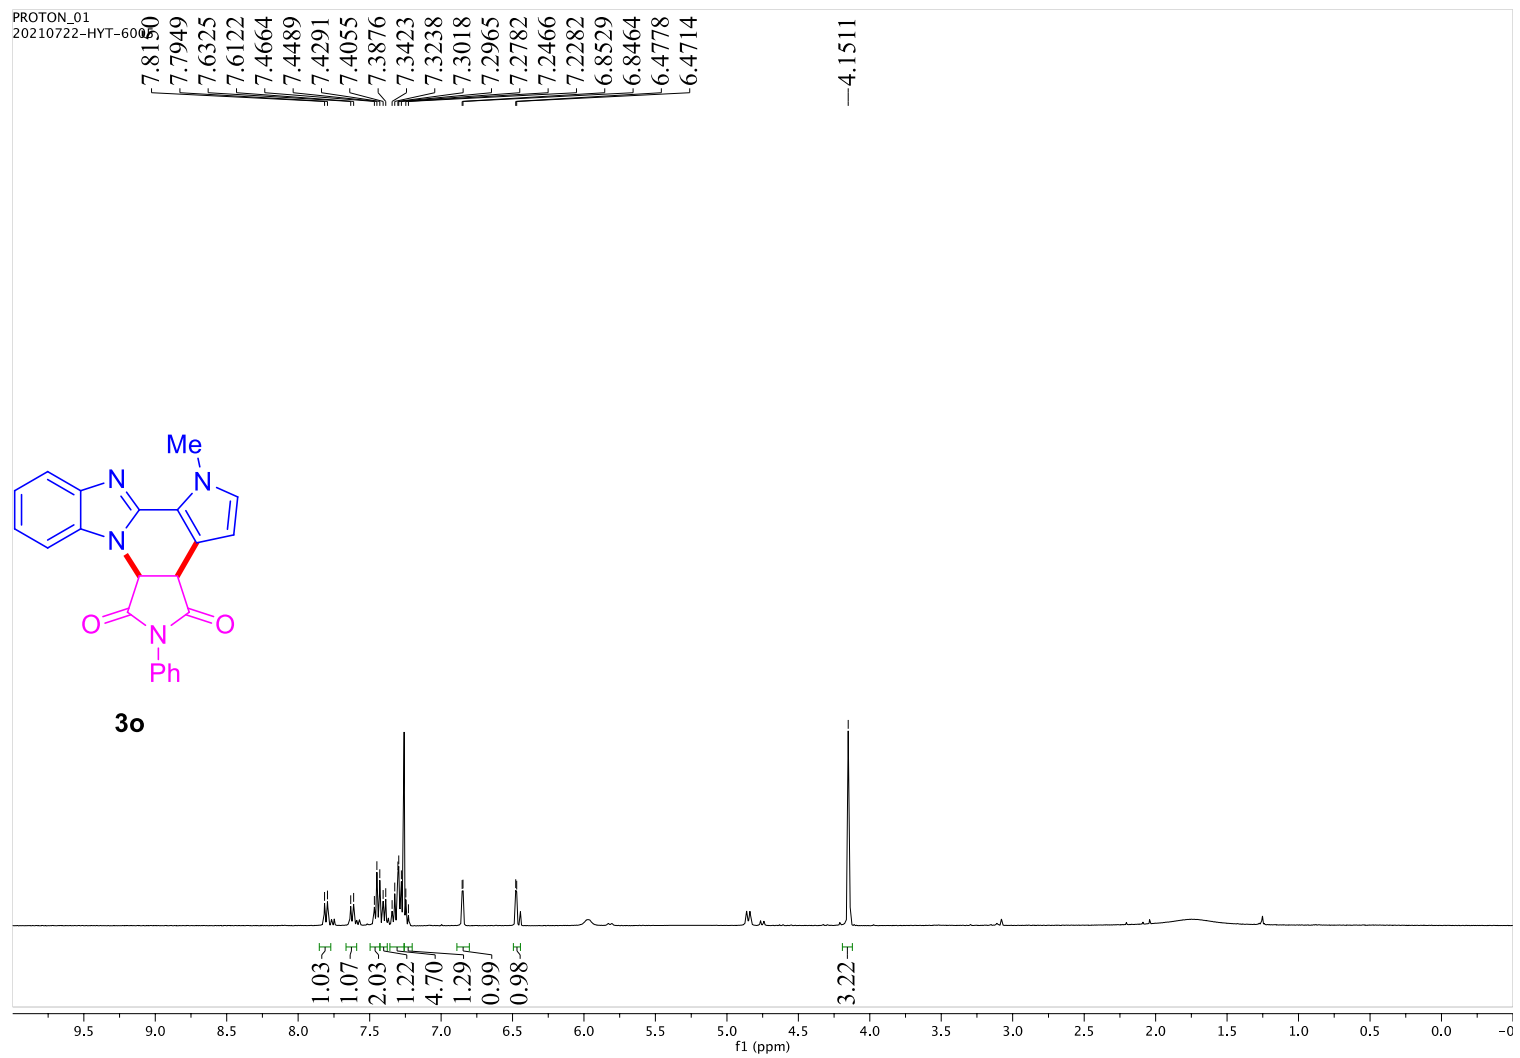

$^1\text{H}$  NMR spectrum (400 MHz) of compound **3o** in  $\text{CDCl}_3$ .

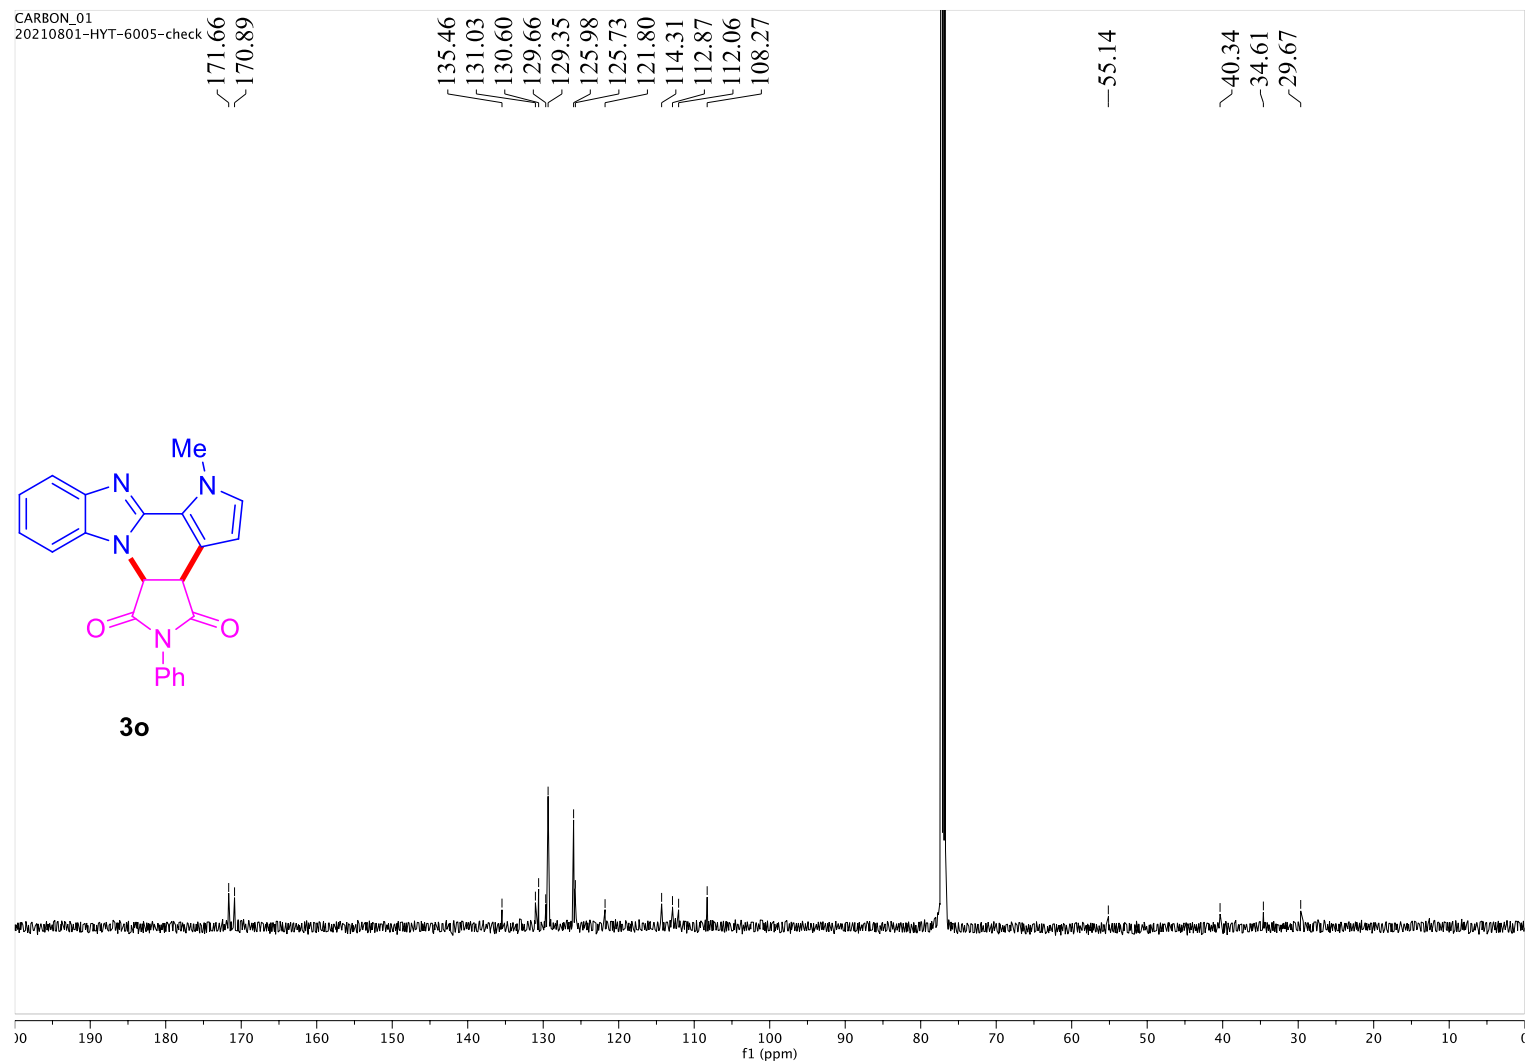

$^{13}\text{C}$  NMR spectrum (100 MHz) of compound **3o** in  $\text{CDCl}_3$ .

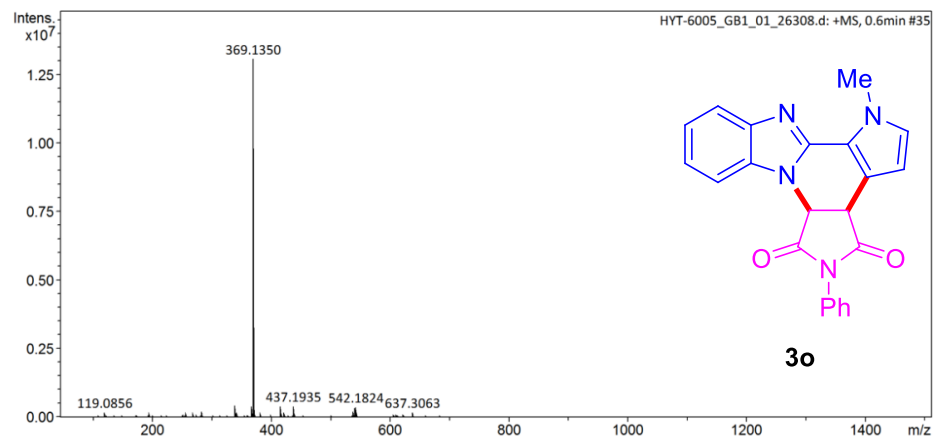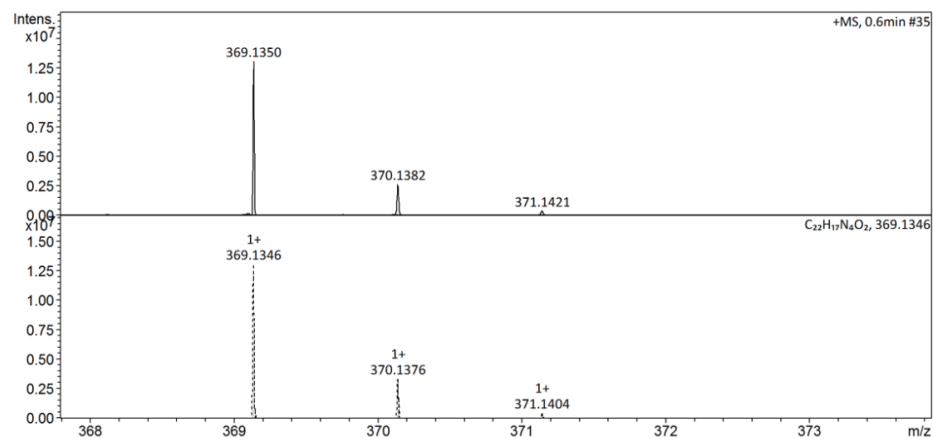

## Display Report

| Meas. m/z | # | Ion Formula                                                   | m/z      | err [ppm] | mSigma | # Sigma | Score  | rdb  | e <sup>-</sup> Conf | N-Rule | Adduct |
|-----------|---|---------------------------------------------------------------|----------|-----------|--------|---------|--------|------|---------------------|--------|--------|
| 369.1350  | 1 | C <sub>22</sub> H <sub>17</sub> N <sub>4</sub> O <sub>2</sub> | 369.1346 | -1.1      | 31.5   | 1       | 100.00 | 16.5 | even                | ok     | M+H    |

HRMS (ESI) of compound **3o**.



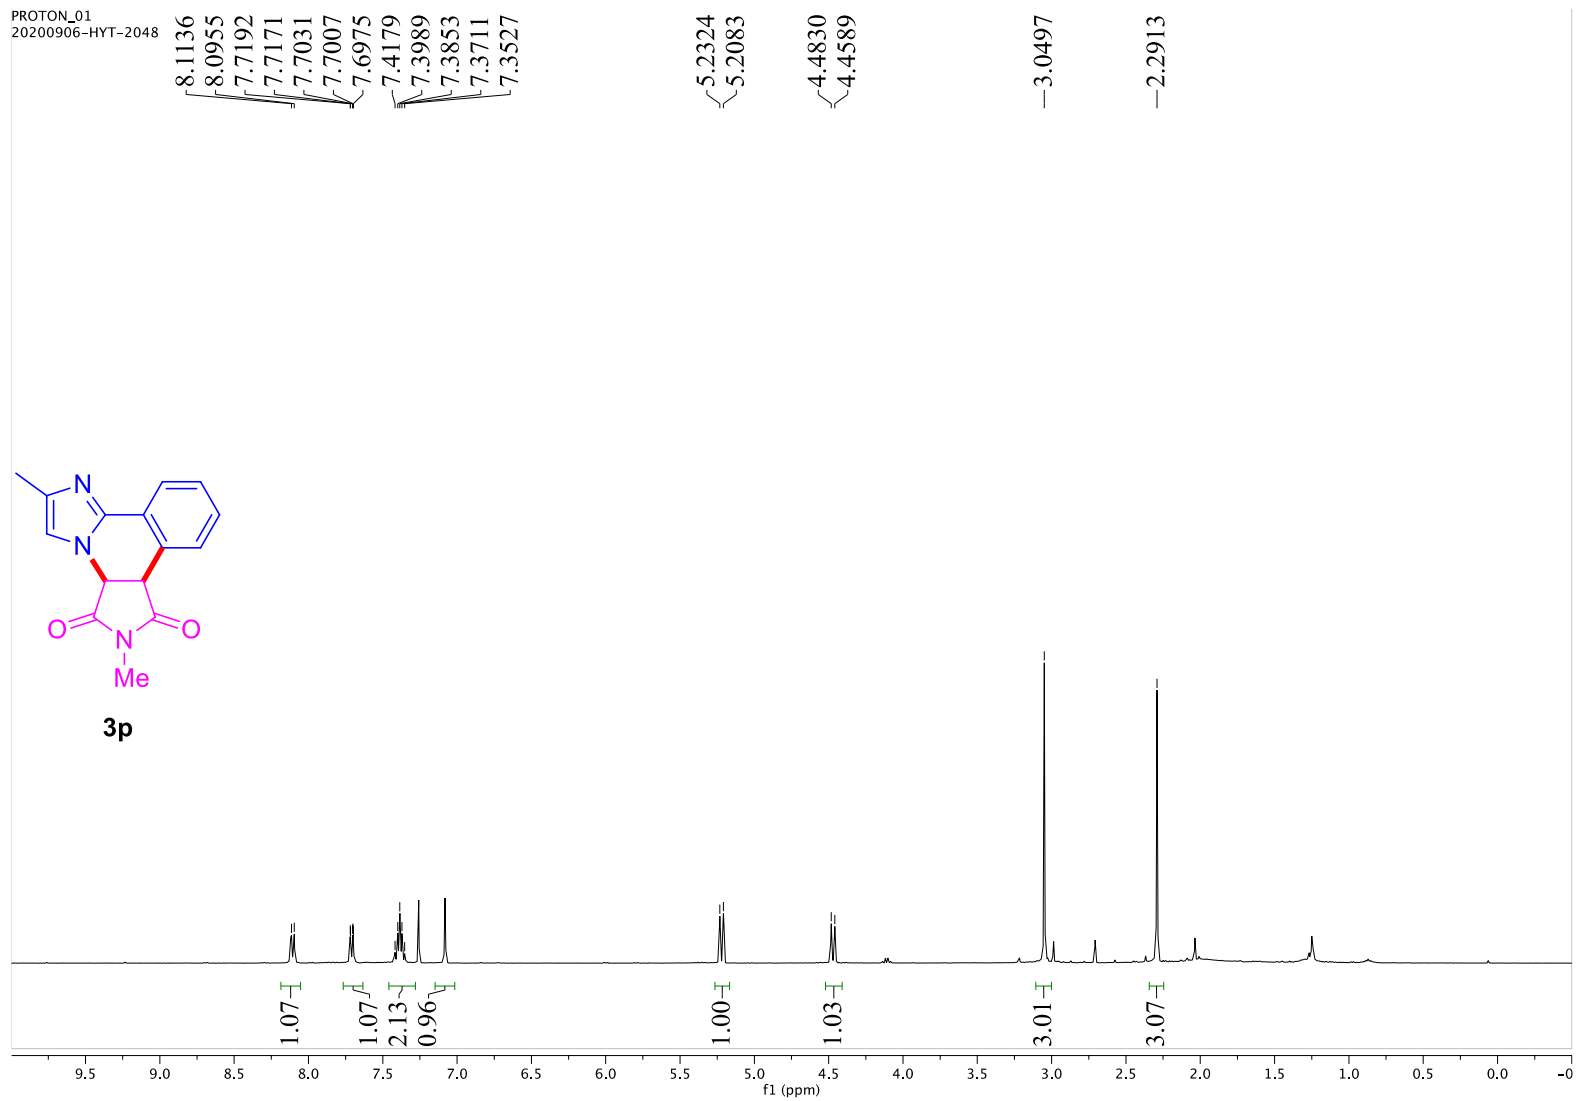

$^1\text{H}$  NMR spectrum (400 MHz) of compound **3p** in  $\text{CDCl}_3$ .

CARBON\_01  
20200906-HYT-2048

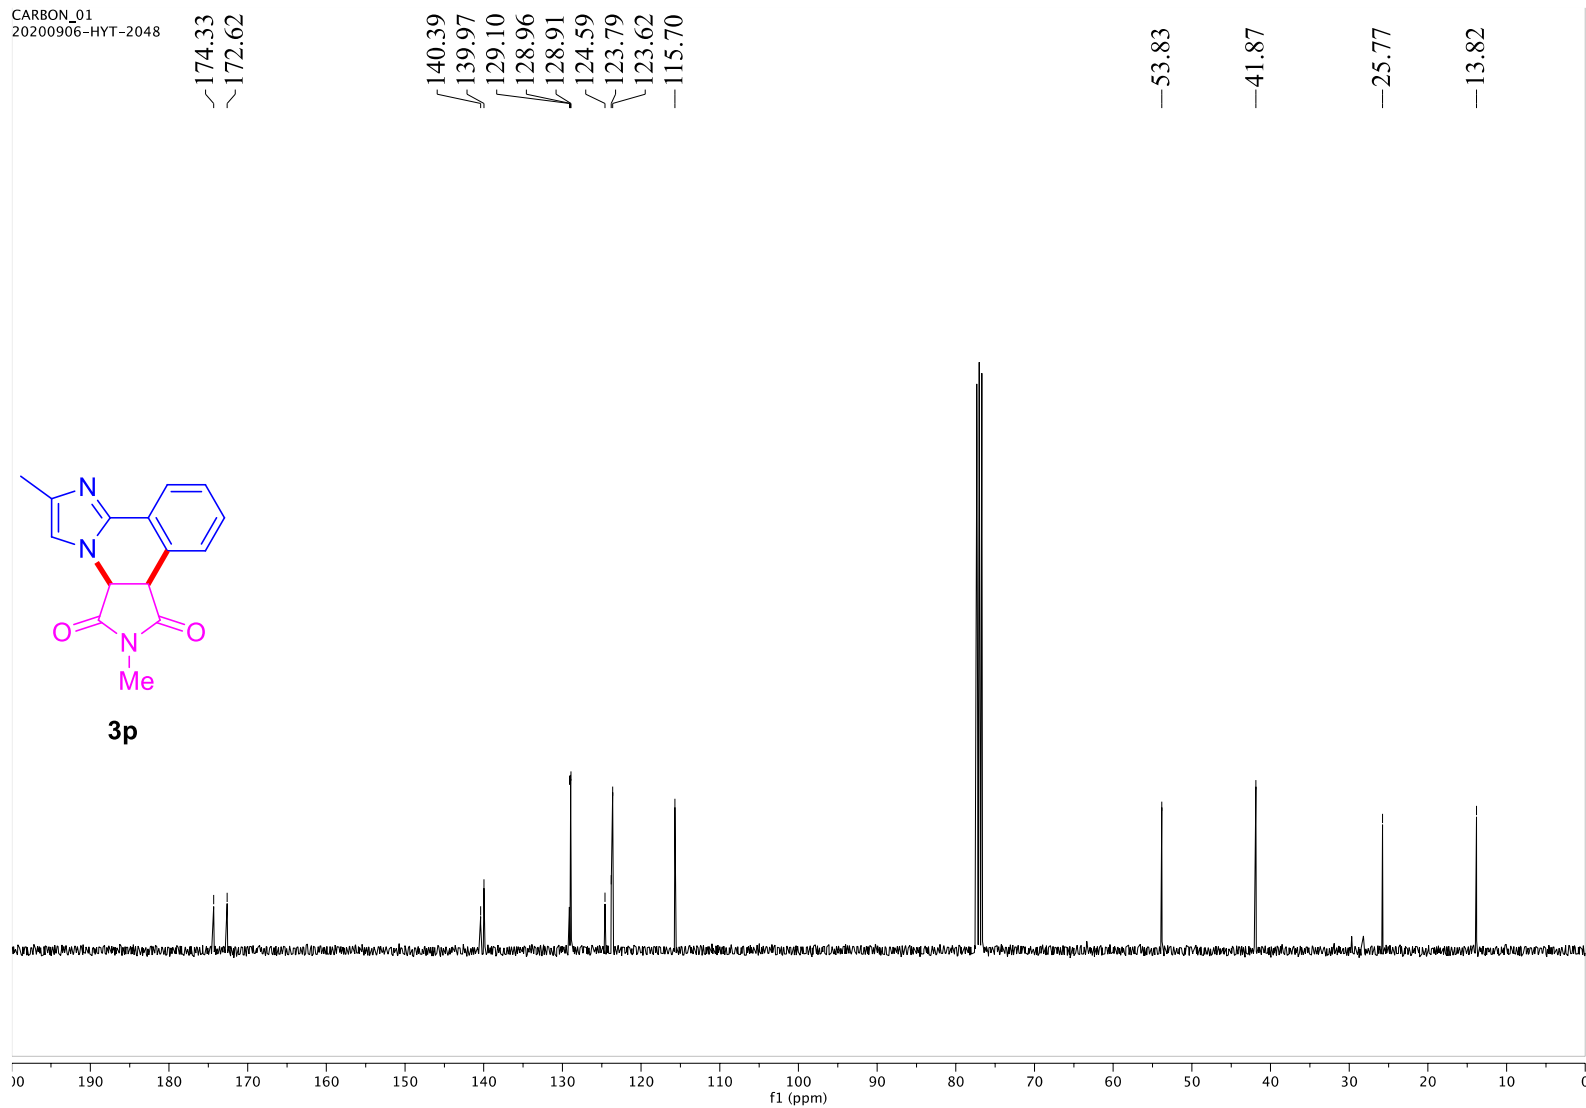

$^{13}\text{C}$  NMR spectrum (100 MHz) of compound **3p** in  $\text{CDCl}_3$ .

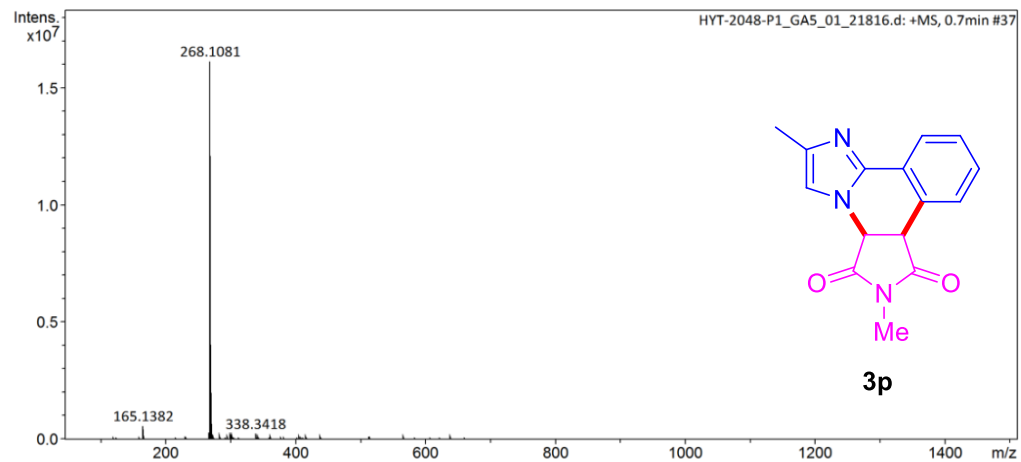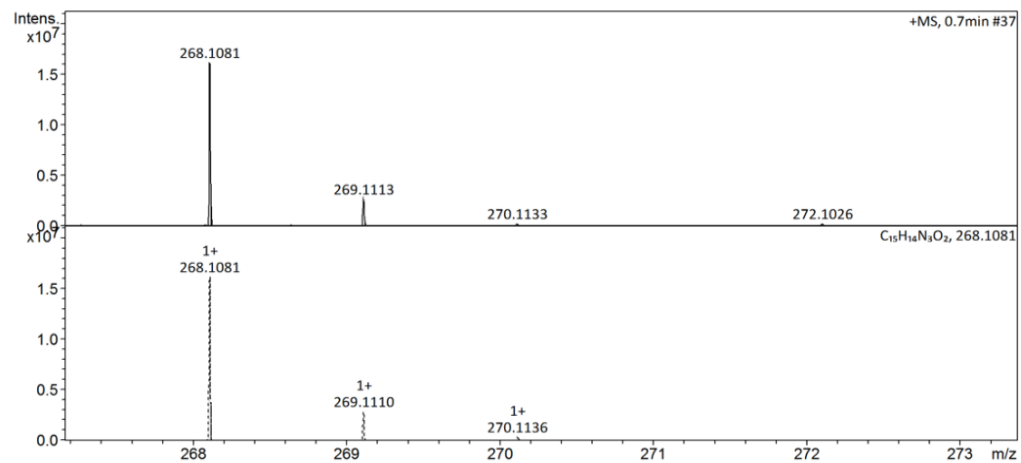

## Display Report

| Meas. m/z | # | Ion Formula                                                   | m/z      | err [ppm] | mSigma | # Sigma | Score  | rdb  | e <sup>-</sup> Conf | N-Rule | Adduct |
|-----------|---|---------------------------------------------------------------|----------|-----------|--------|---------|--------|------|---------------------|--------|--------|
| 268.1081  | 1 | C <sub>15</sub> H <sub>14</sub> N <sub>3</sub> O <sub>2</sub> | 268.1081 | -0.2      | 6.4    | 1       | 100.00 | 10.5 | even                | ok     | M+H    |

HRMS (ESI) of compound **3p**.

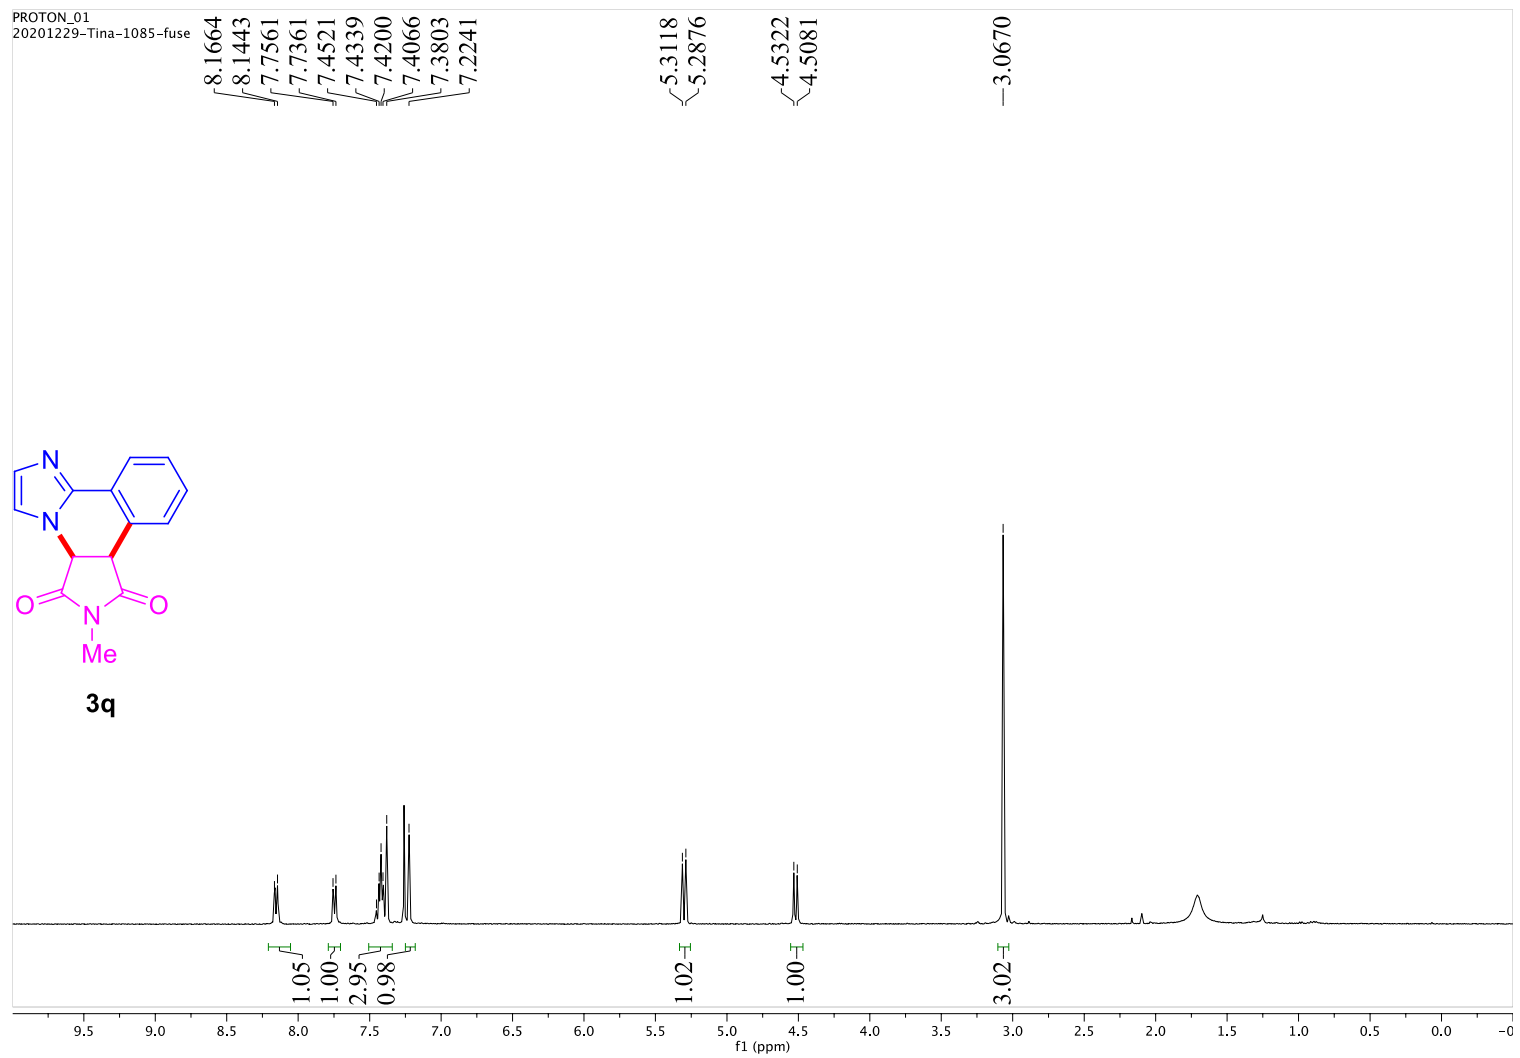

$^1\text{H}$  NMR spectrum (400 MHz) of compound **3q** in  $\text{CDCl}_3$ .

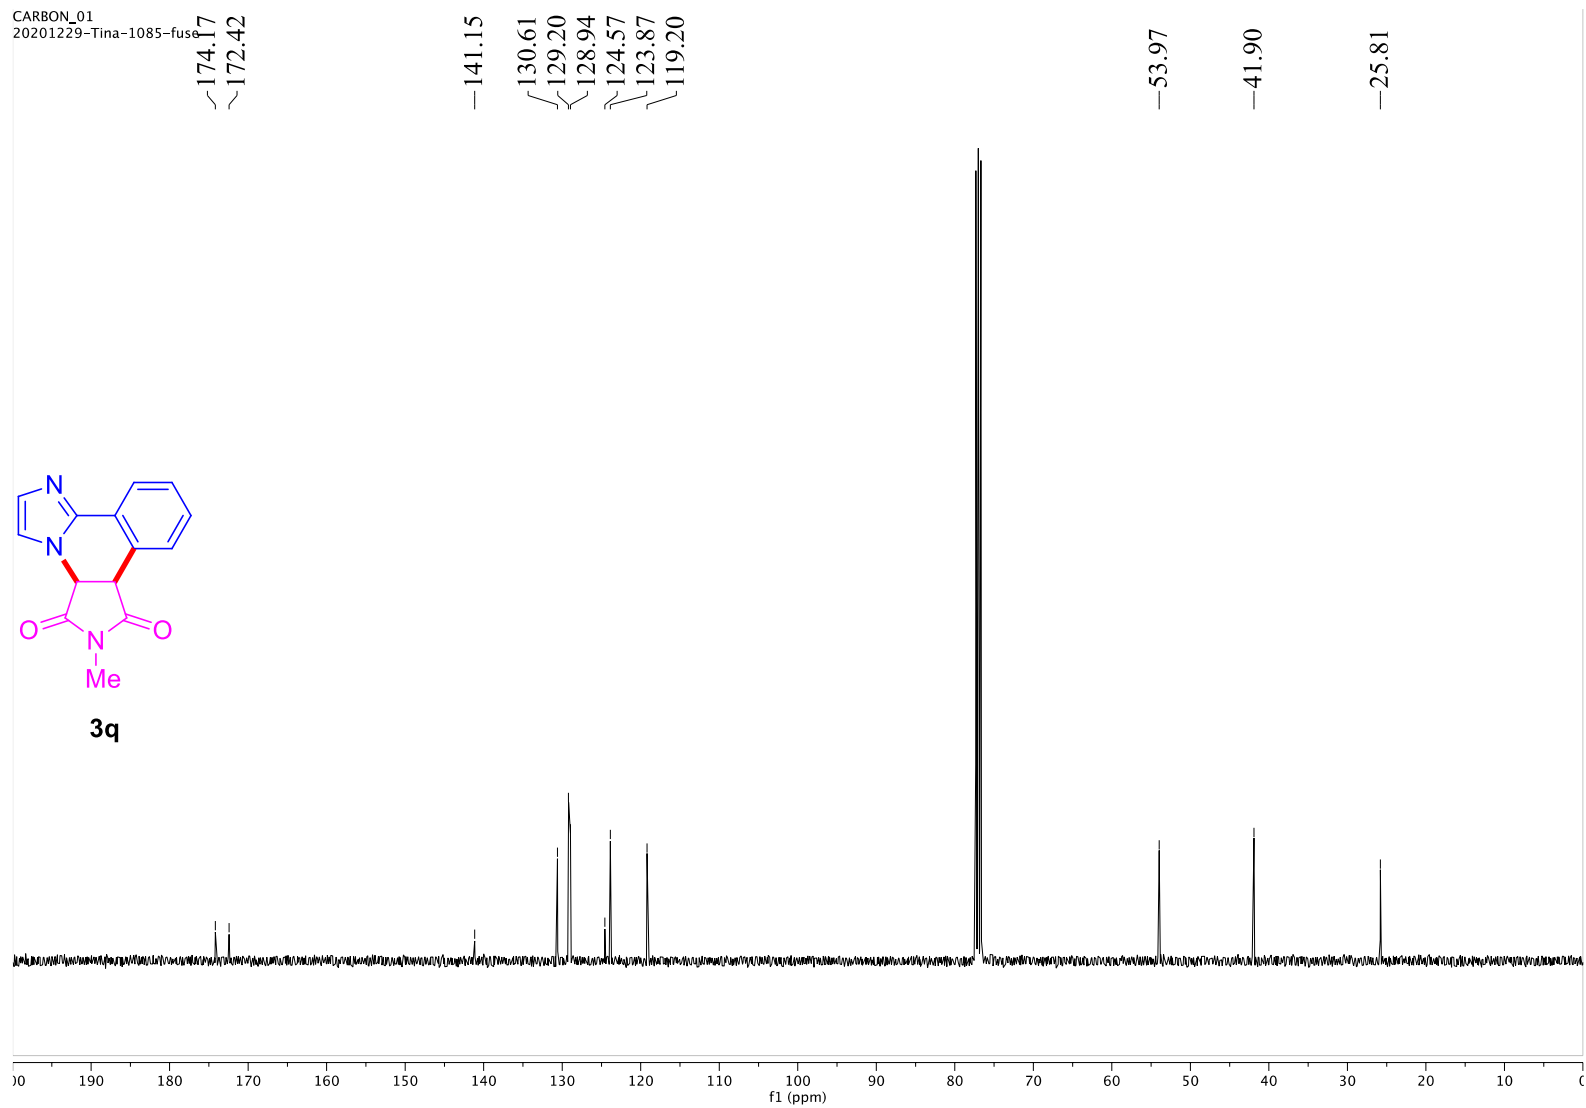

$^{13}\text{C}$  NMR spectrum (100 MHz) of compound **3q** in  $\text{CDCl}_3$ .

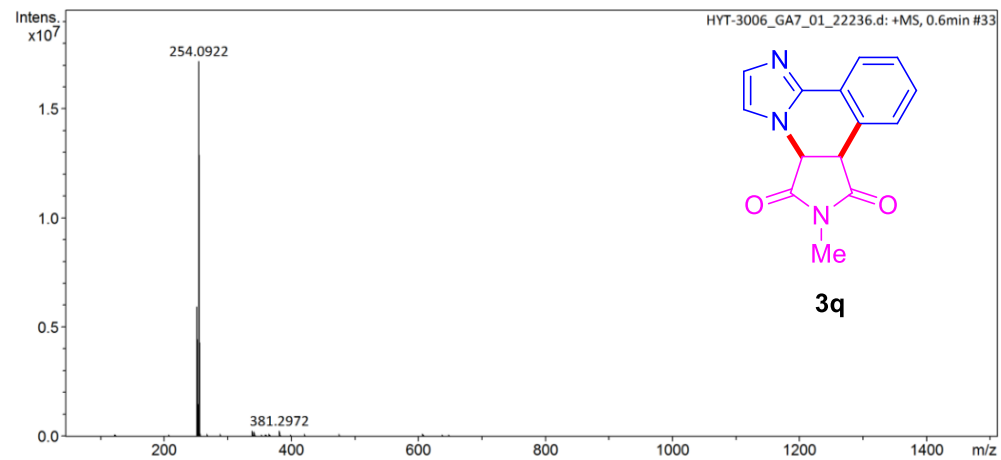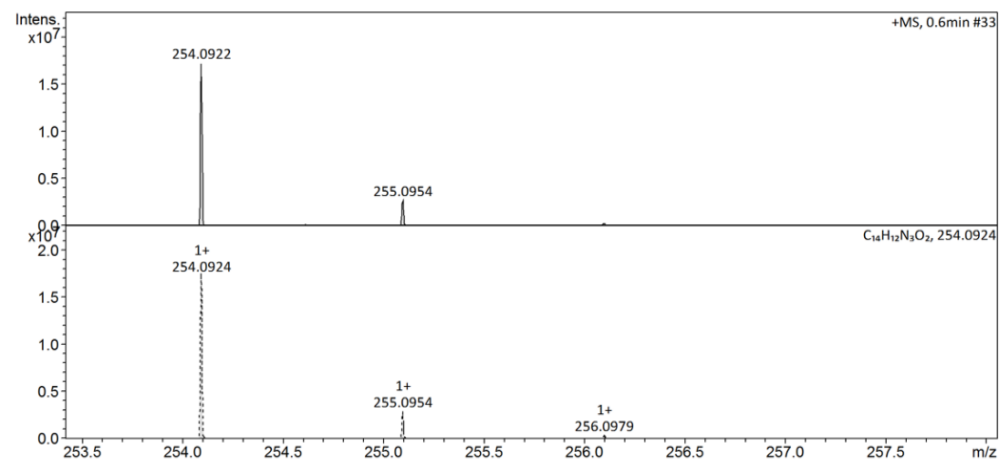

HRMS (ESI) of compound **3q**.

PROTON\_01  
20201217-HYT-3053-P1

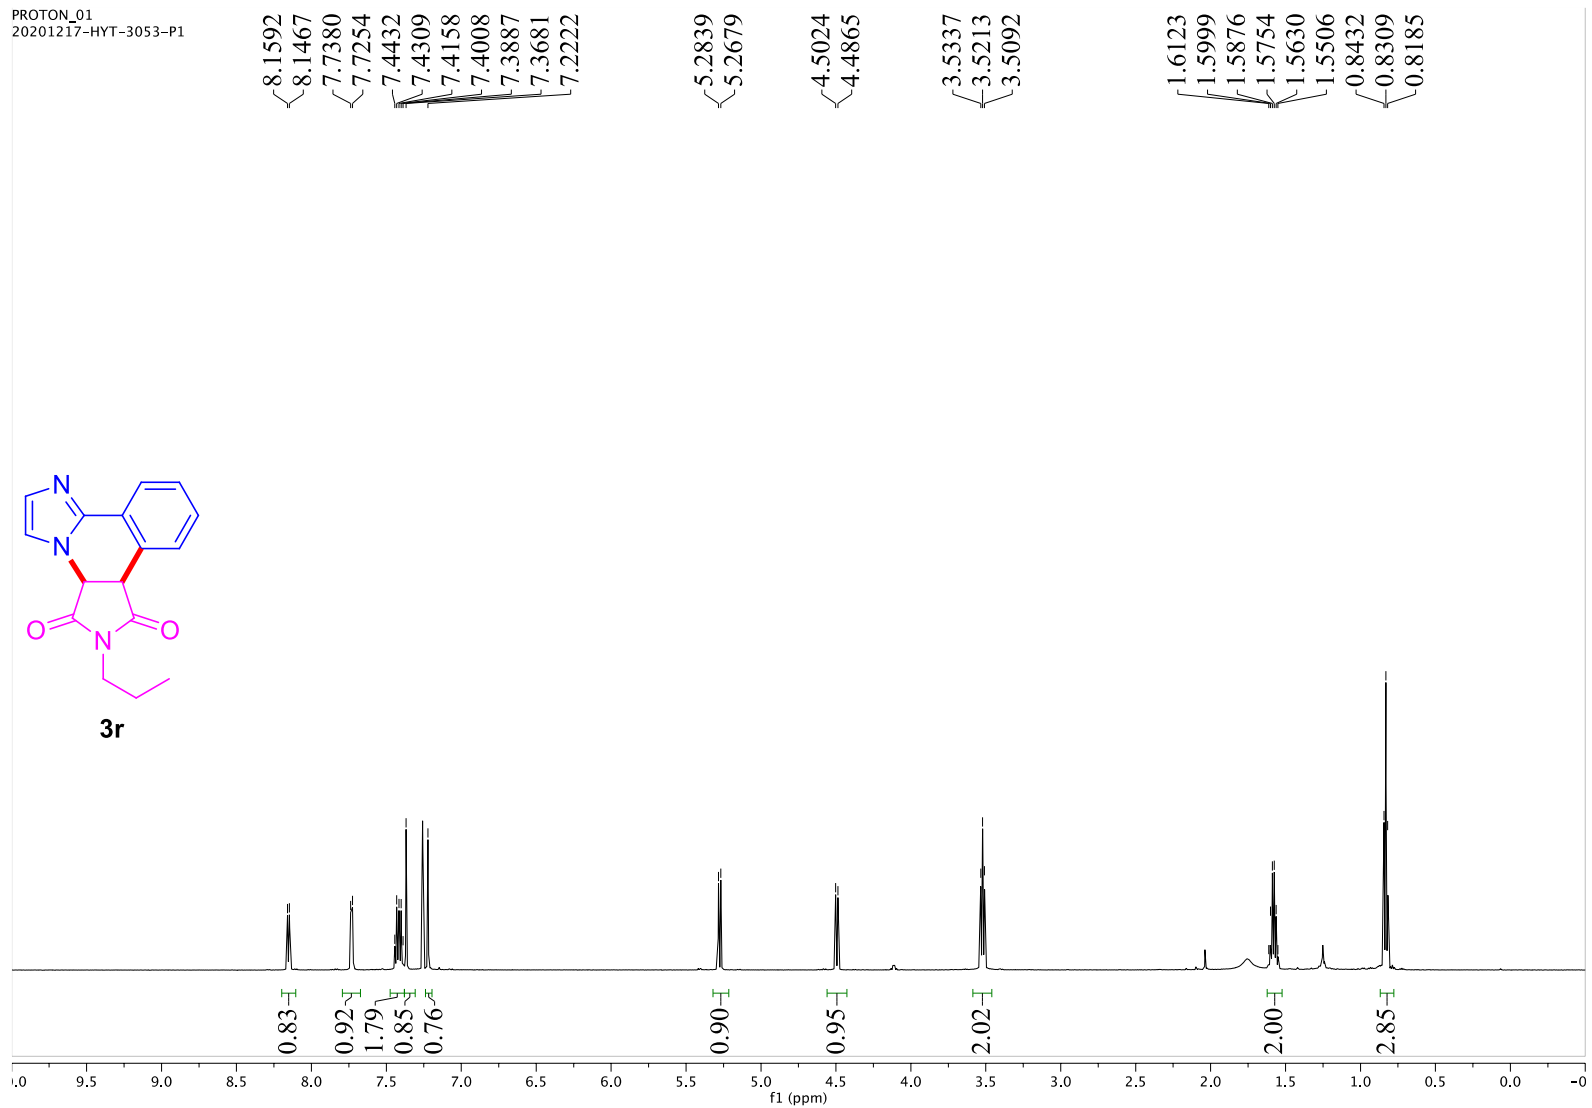

$^1\text{H}$  NMR spectrum (600 MHz) of compound **3r** in  $\text{CDCl}_3$ .

CARBON\_01  
20201217-HYT-3053-P1

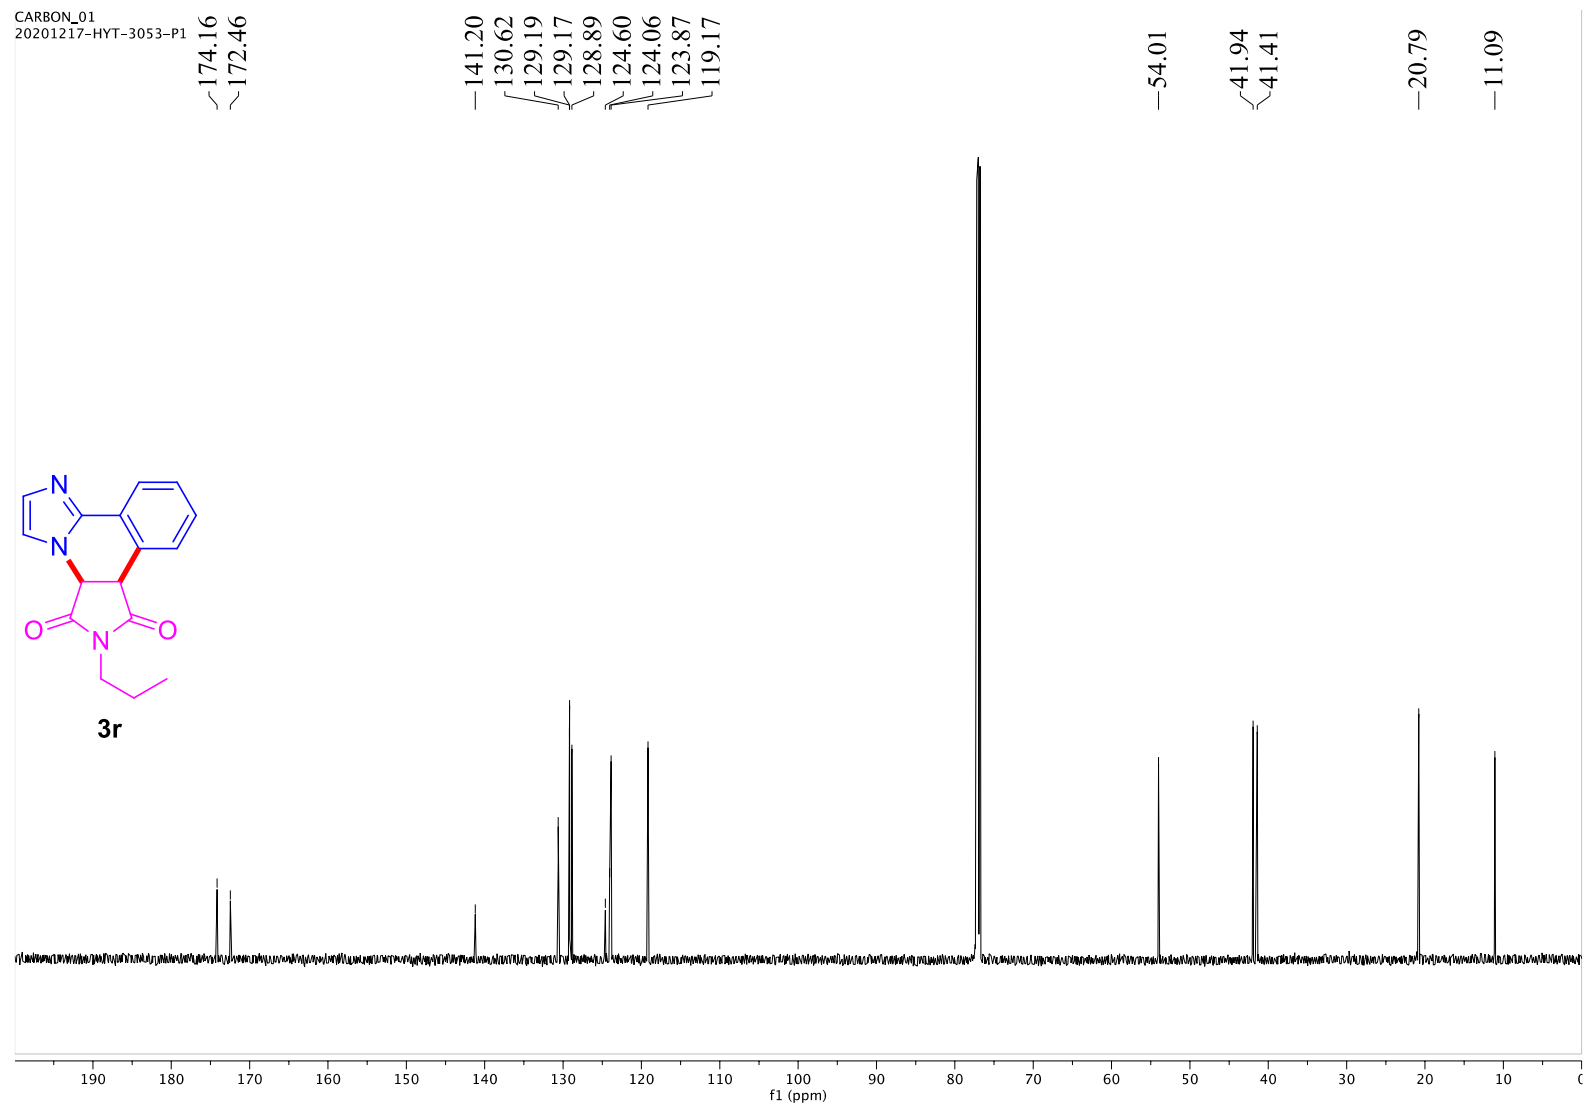

$^{13}\text{C}$  NMR spectrum (150 MHz) of compound **3r** in  $\text{CDCl}_3$ .



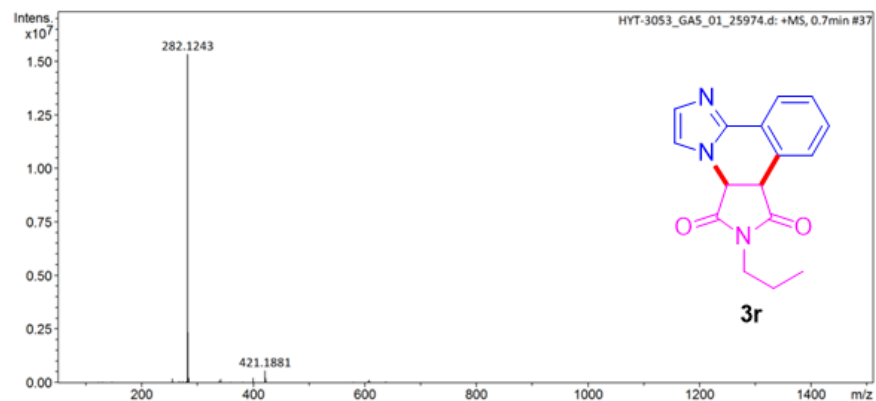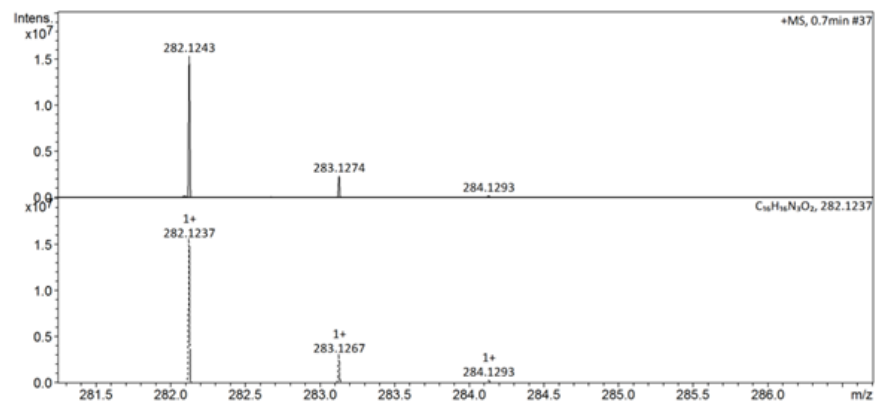

### Display Report

| Meas. m/z | # | Ion Formula                                                   | m/z      | err [ppm] | mSigma | # Sigma | Score  | rdb  | e <sup>-</sup> Conf | N-Rule | Adduct |
|-----------|---|---------------------------------------------------------------|----------|-----------|--------|---------|--------|------|---------------------|--------|--------|
| 282.1243  | 1 | C <sub>16</sub> H <sub>16</sub> N <sub>2</sub> O <sub>2</sub> | 282.1237 | -2.2      | 19.7   | 1       | 100.00 | 10.5 | even                | ok     | M+H    |

HRMS (ESI) of compound **3r**

PROTON\_01  
20201217-HYT-3052-600NMR

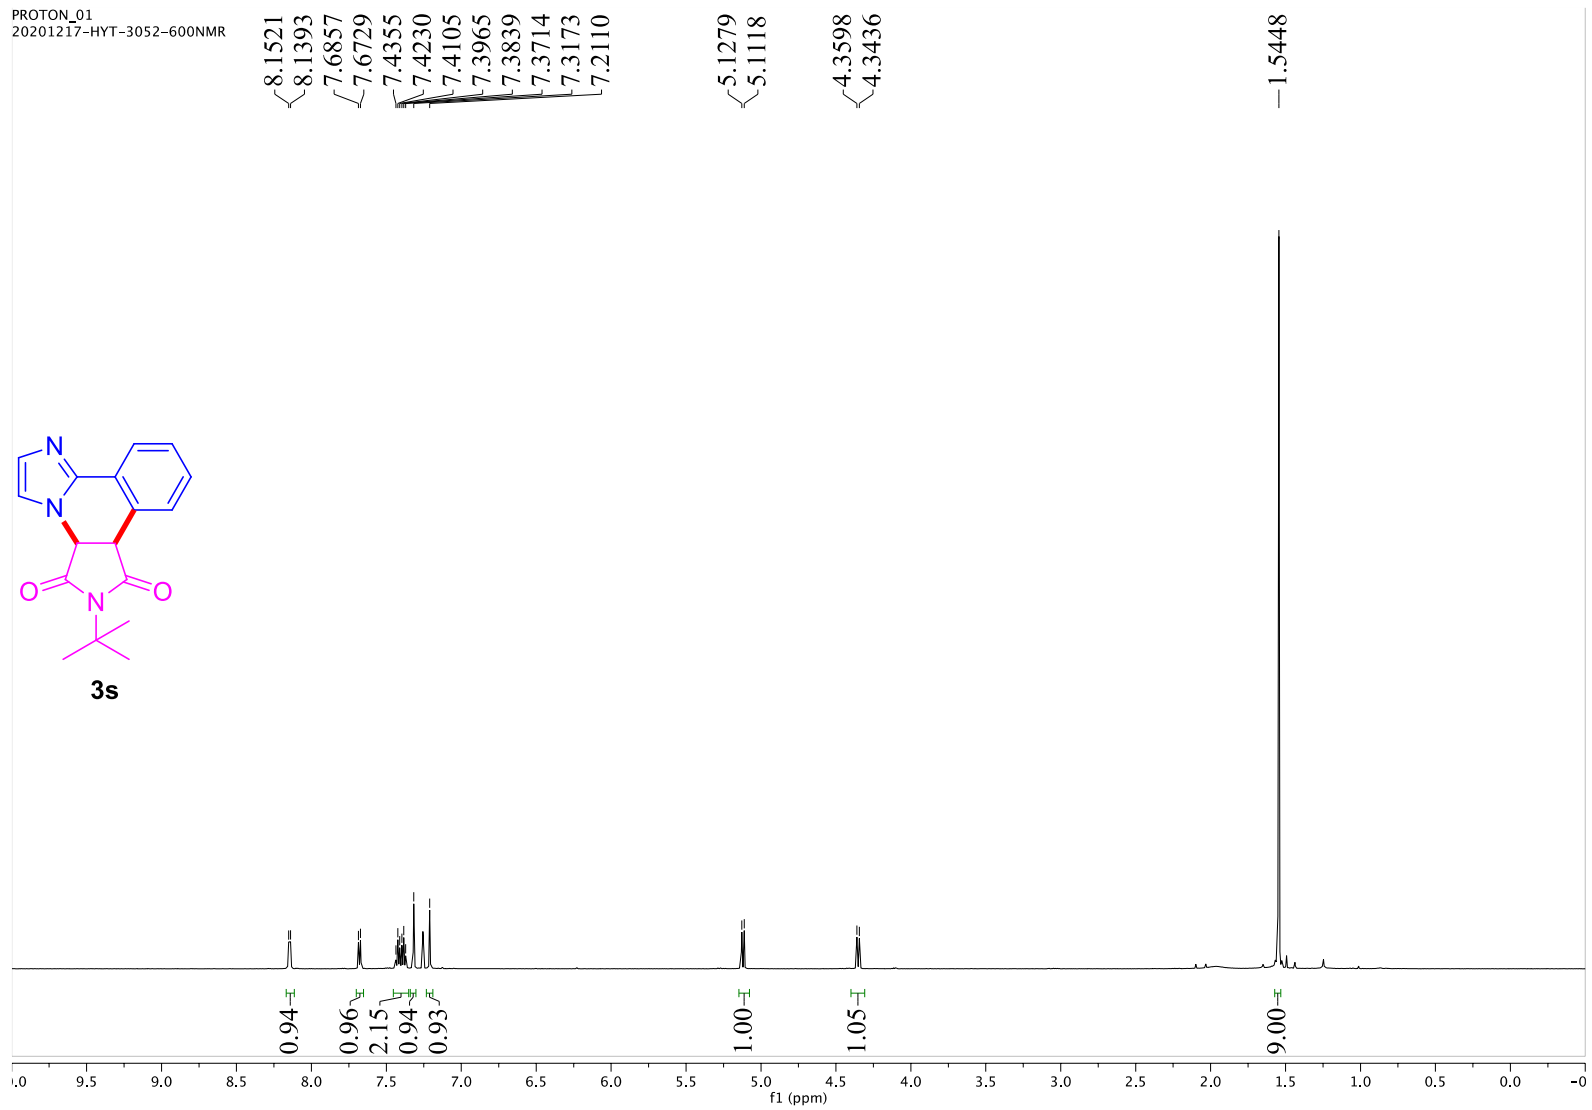

$^1\text{H}$  NMR spectrum (600 MHz) of compound **3s** in  $\text{CDCl}_3$ .

CARBON\_01  
20201217-HYT-3052-6000M

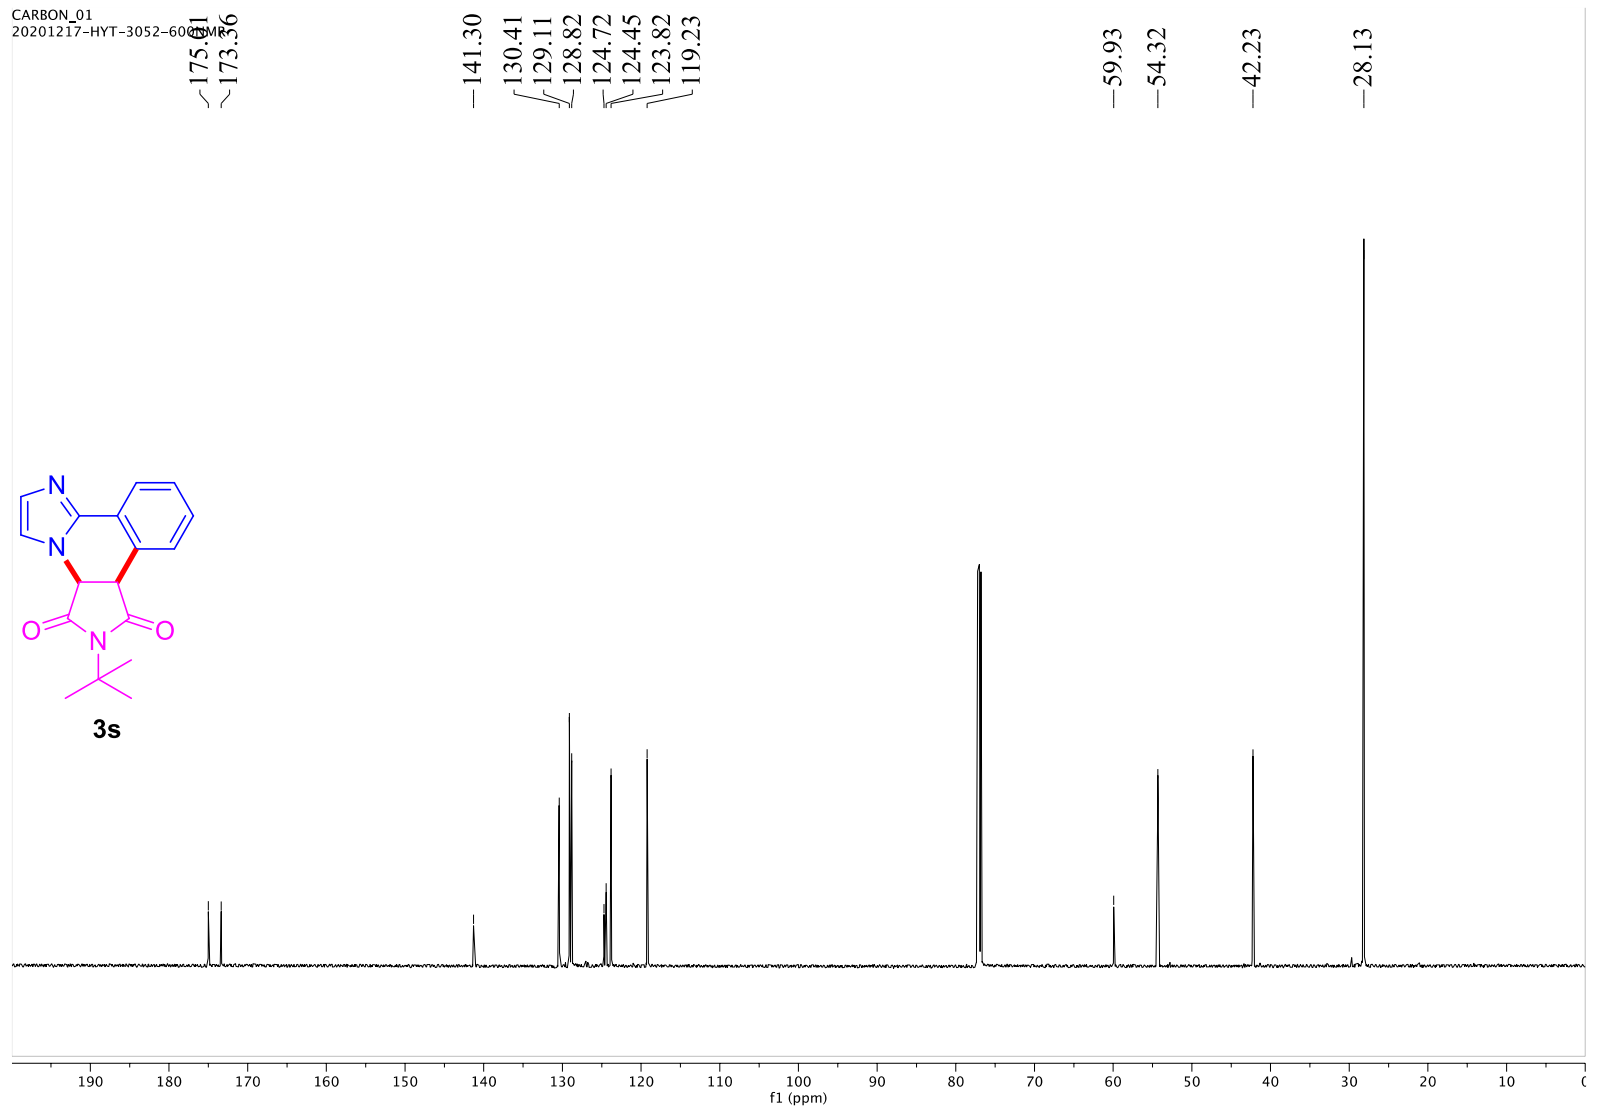

$^{13}\text{C}$  NMR spectrum (150 MHz) of compound **3s** in  $\text{CDCl}_3$ .

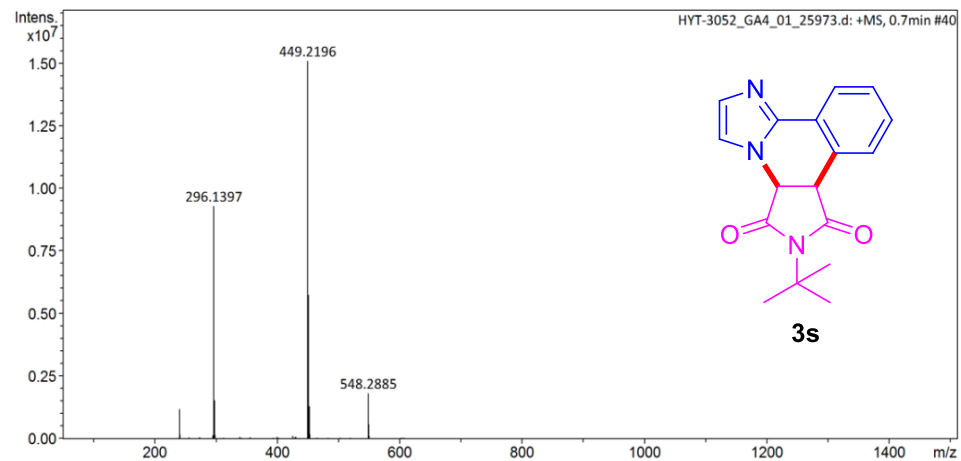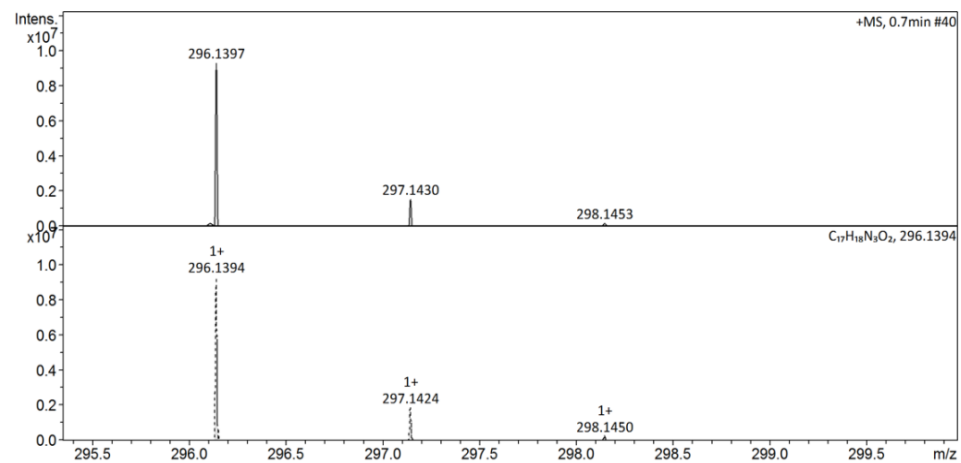

## Display Report

| Meas. m/z | # | Ion Formula                                                   | m/z      | err [ppm] | mSigma | # Sigma | Score  | rdb  | e <sup>-</sup> Conf | N-Rule | Adduct |
|-----------|---|---------------------------------------------------------------|----------|-----------|--------|---------|--------|------|---------------------|--------|--------|
| 296.1397  | 1 | C <sub>17</sub> H <sub>18</sub> N <sub>3</sub> O <sub>2</sub> | 296.1394 | -1.3      | 19.2   | 1       | 100.00 | 10.5 | even                | ok     | M+H    |

HRMS (ESI) of compound **3s**

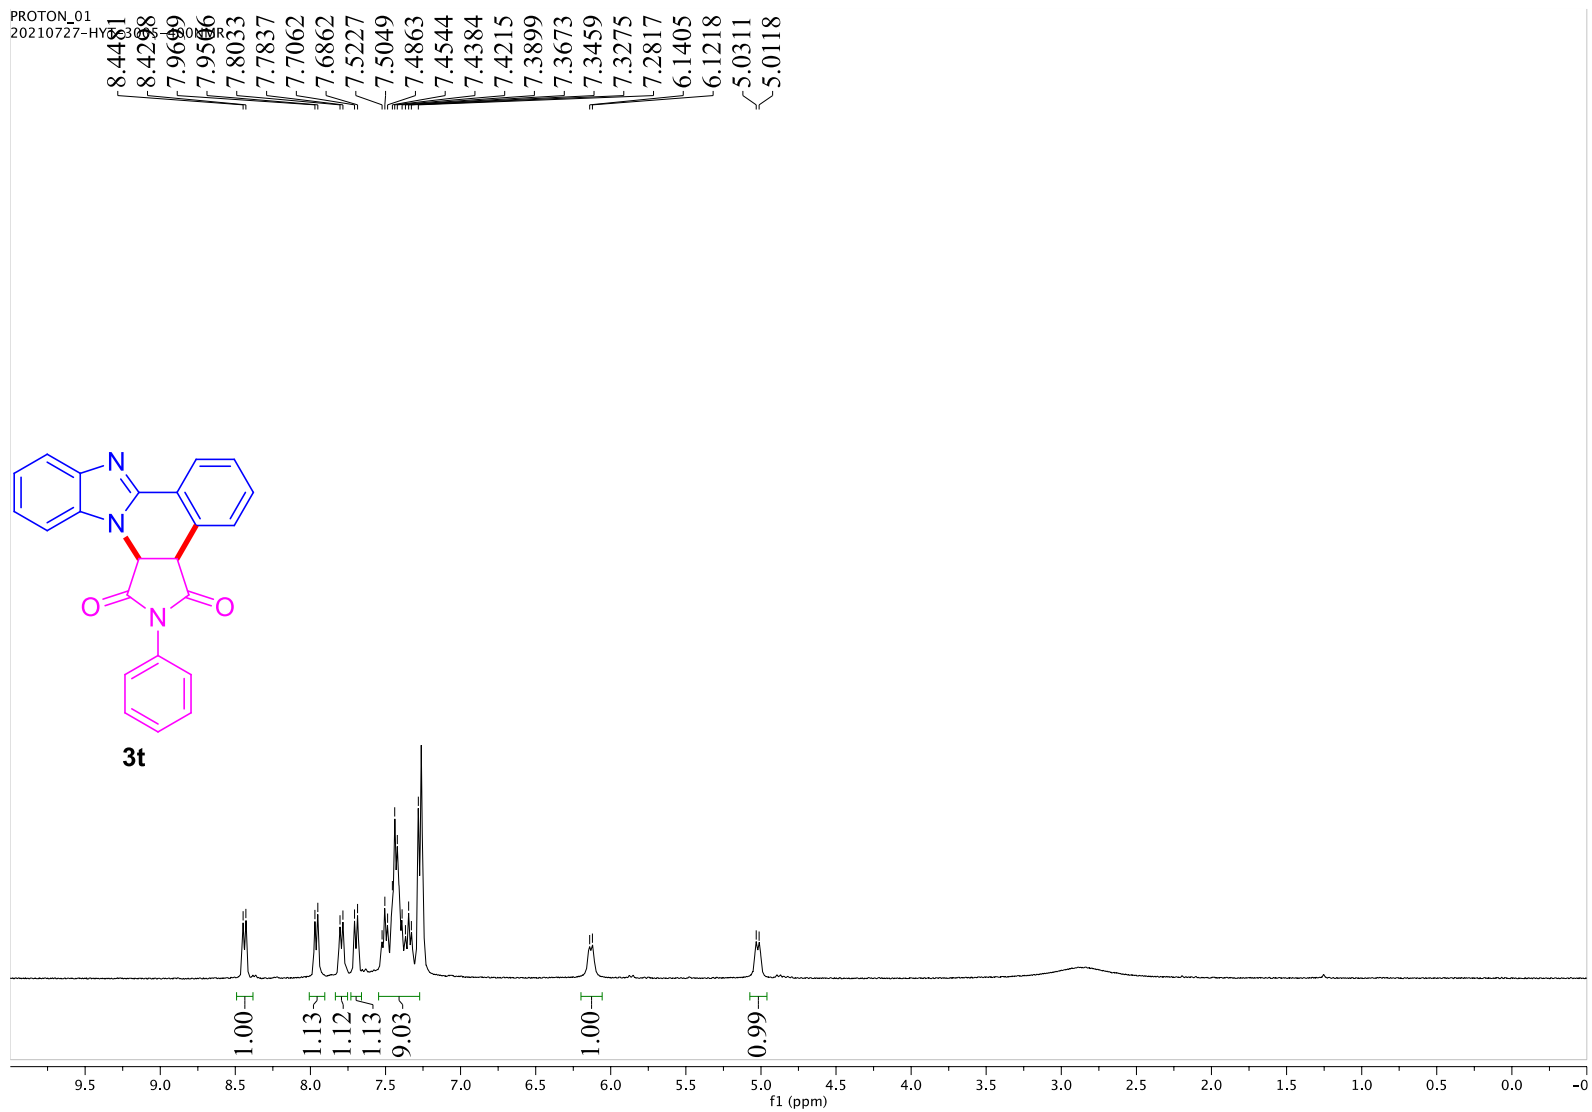

$^1\text{H}$  NMR spectrum (400 MHz) of compound **3t** in  $\text{CDCl}_3$ .

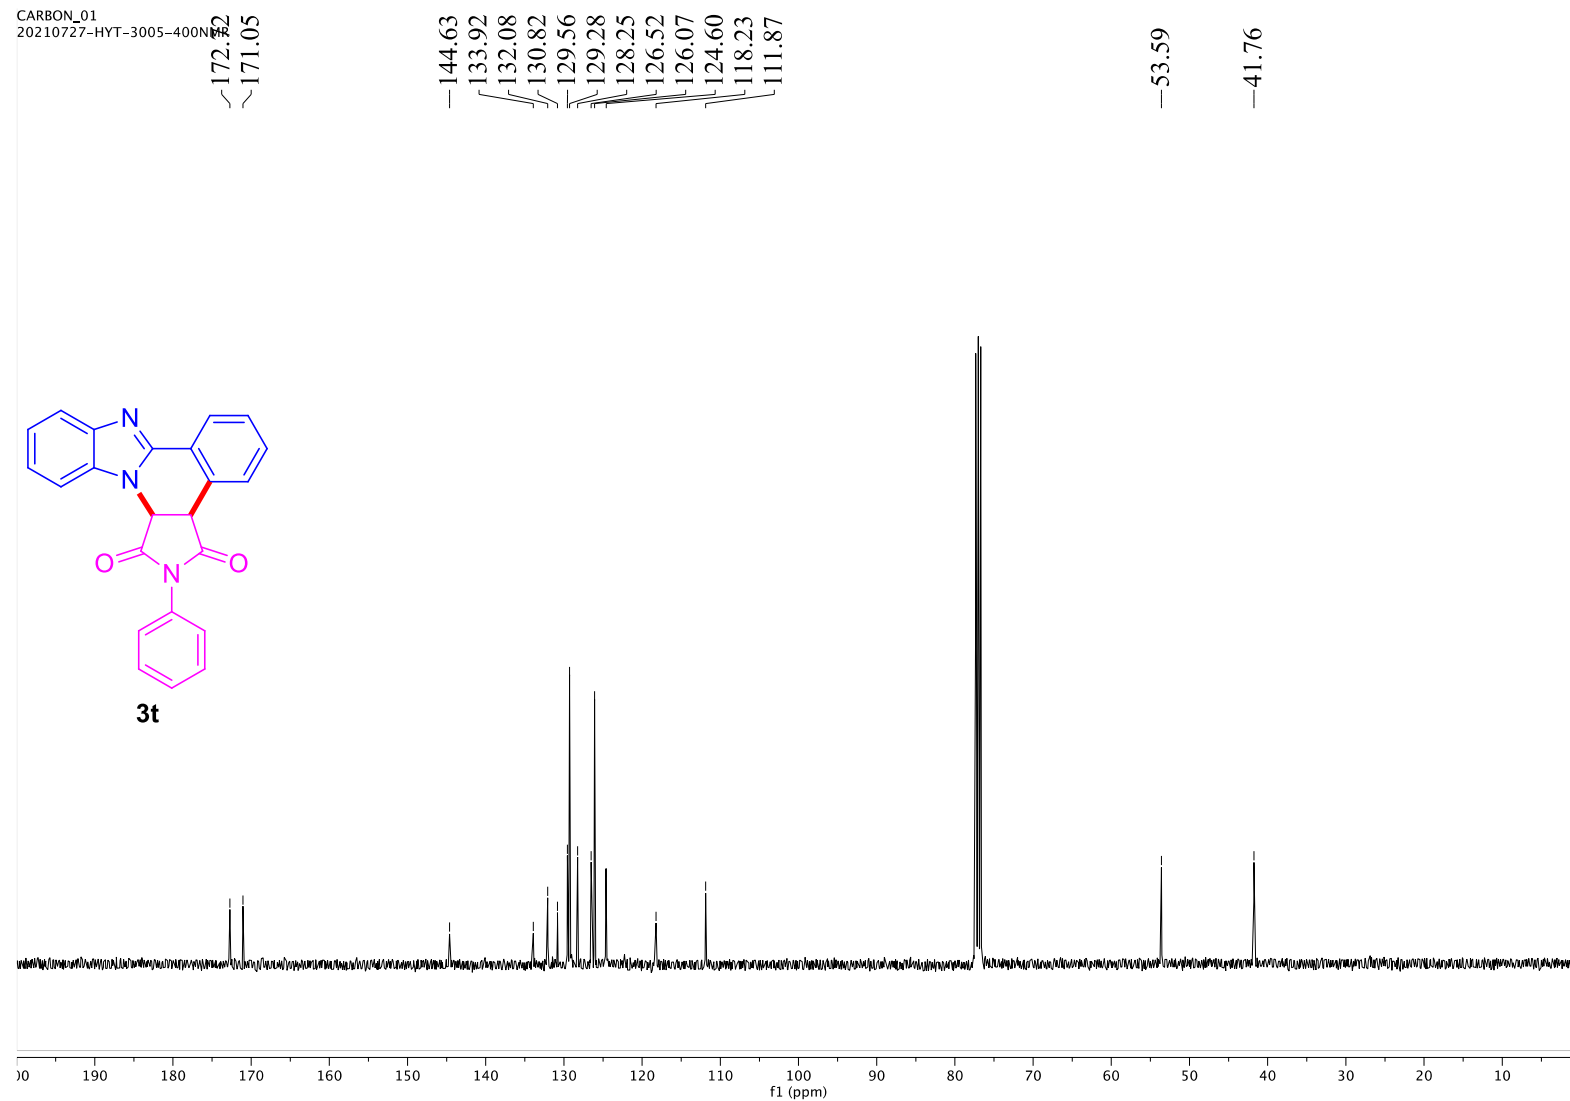

$^{13}\text{C}$  NMR spectrum (100 MHz) of compound **3t** in  $\text{CDCl}_3$ .

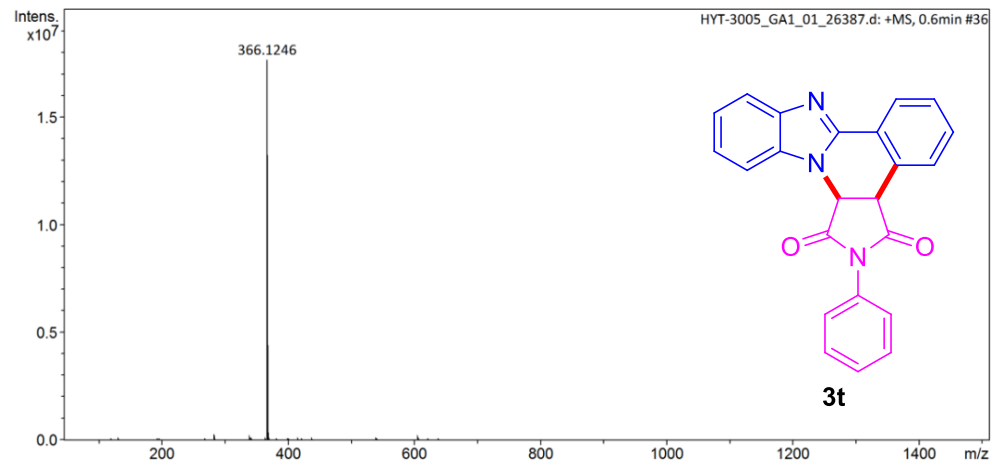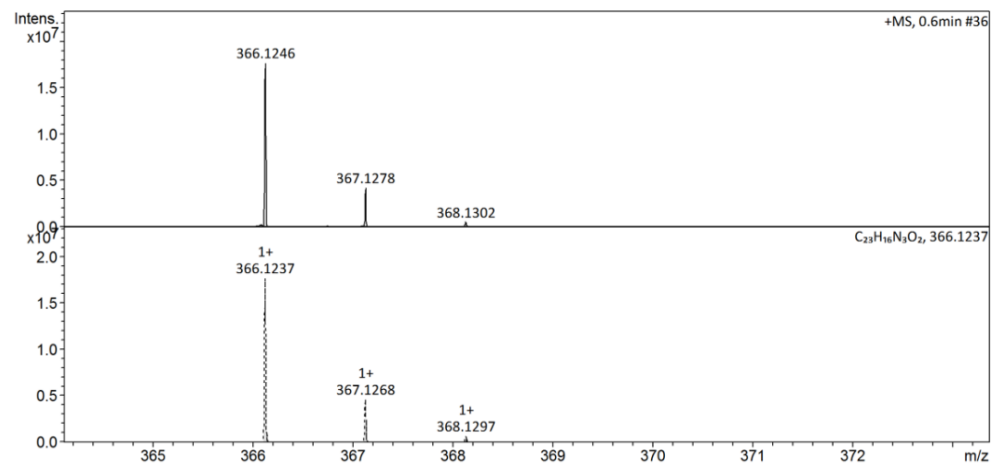

## Display Report

| Meas. m/z | # | Ion Formula                                                   | m/z      | err [ppm] | mSigma | # Sigma | Score  | rdb  | e <sup>-</sup> Conf | N-Rule | Adduct |
|-----------|---|---------------------------------------------------------------|----------|-----------|--------|---------|--------|------|---------------------|--------|--------|
| 366.1246  | 1 | C <sub>23</sub> H <sub>16</sub> N <sub>3</sub> O <sub>2</sub> | 366.1237 | 2.6       | 12.9   | 1       | 100.00 | 17.5 | even                | ok     | M      |

HRMS (ESI) of compound **3t**.

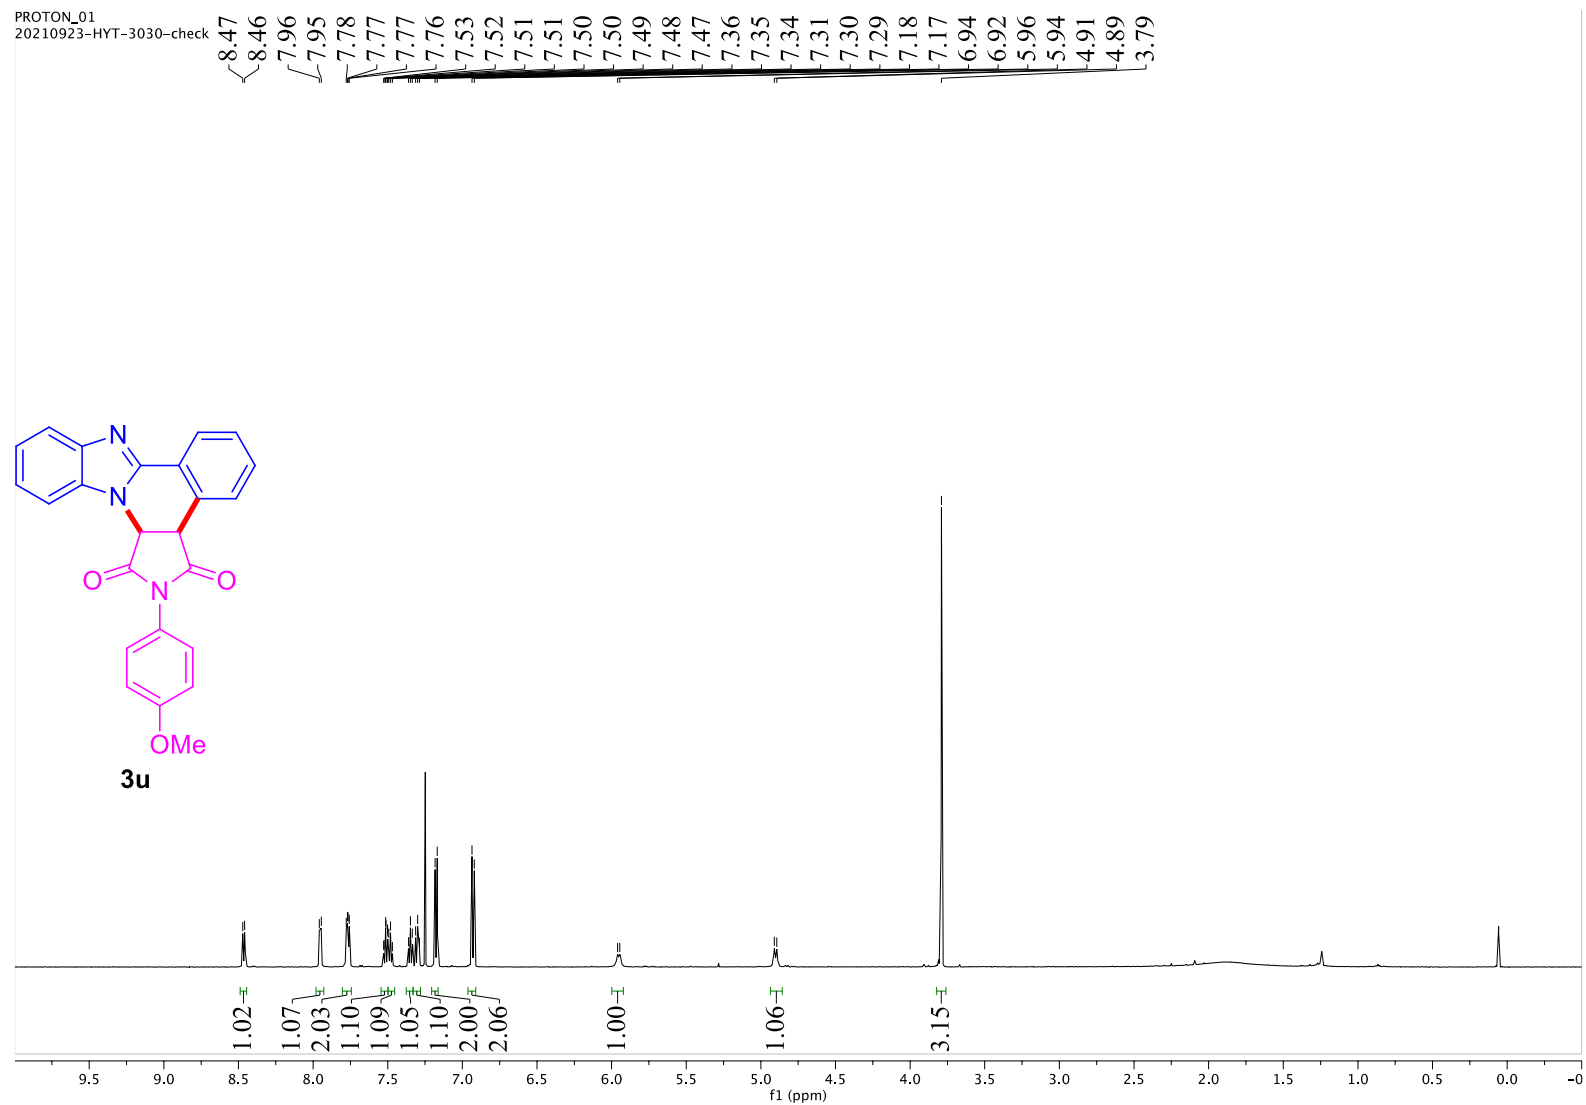

<sup>1</sup>H NMR spectrum (400 MHz) of compound **3u** in CDCl<sub>3</sub>.



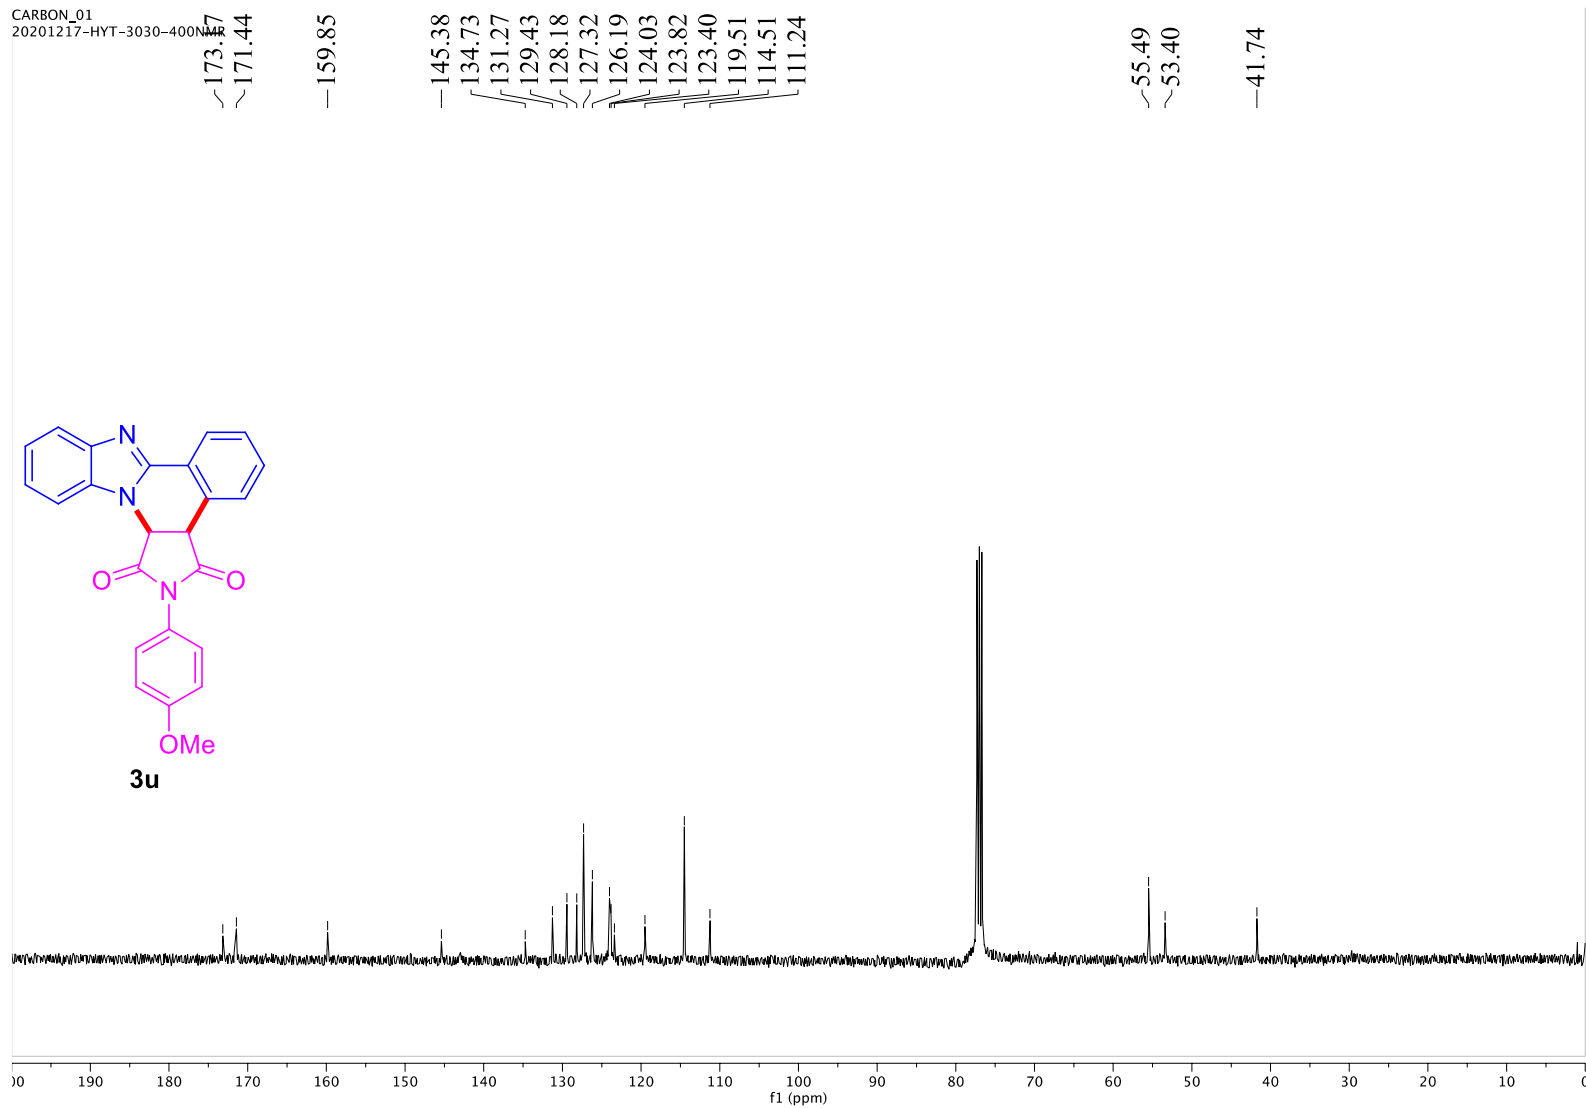

<sup>13</sup>C NMR spectrum (100 MHz) of compound **3u** in CDCl<sub>3</sub>.

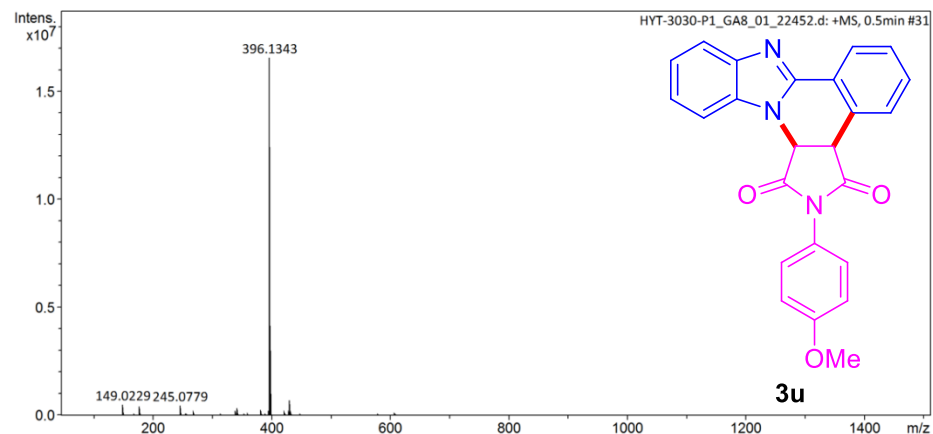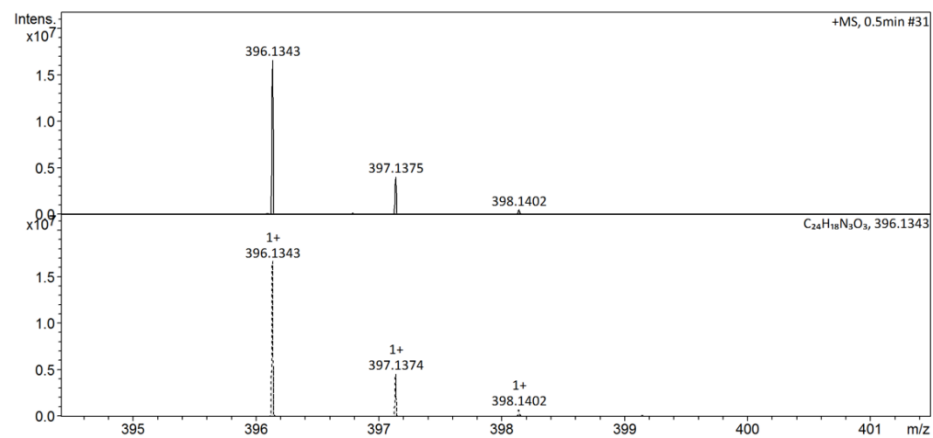

## Display Report

| Meas. m/z | # | Ion Formula                                                   | m/z      | err [ppm] | mSigma | # Sigma | Score  | rdb  | e <sup>-</sup> Conf | N-Rule | Adduct |
|-----------|---|---------------------------------------------------------------|----------|-----------|--------|---------|--------|------|---------------------|--------|--------|
| 396.1343  | 1 | C <sub>24</sub> H <sub>18</sub> N <sub>2</sub> O <sub>3</sub> | 396.1343 | 0.0       | 17.3   | 1       | 100.00 | 17.5 | even                | ok     | M+H    |

HRMS (ESI) of compound **3u**.

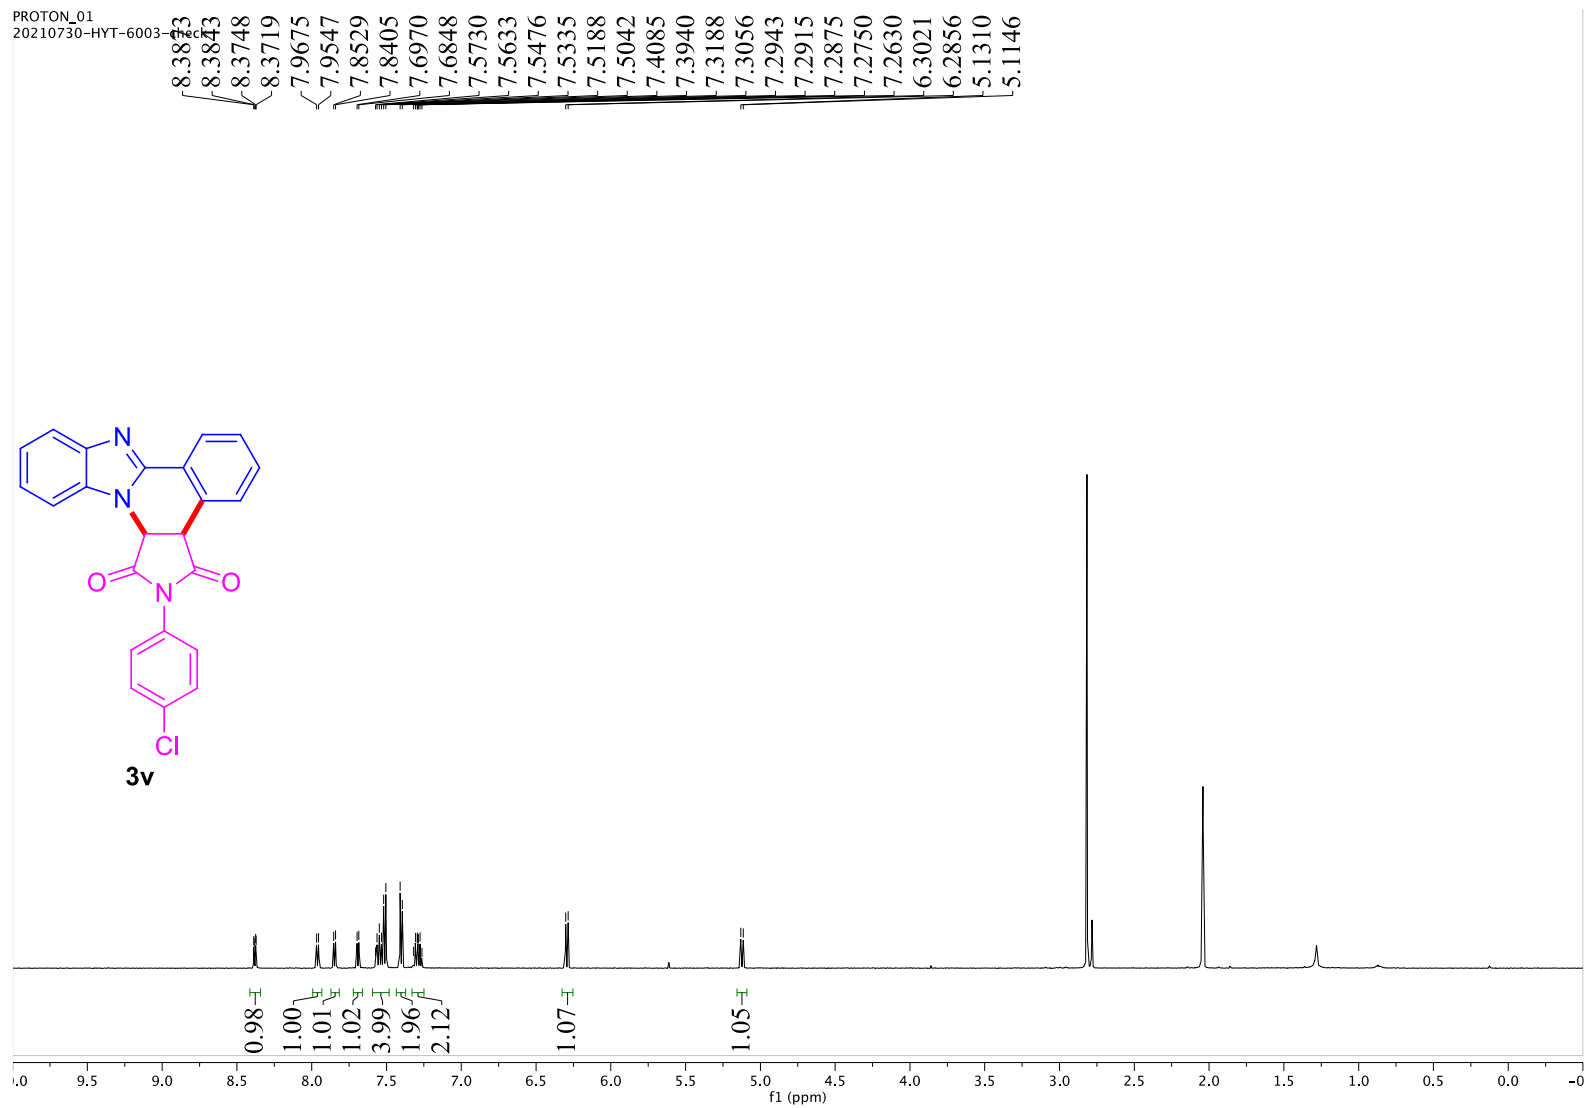

$^1\text{H}$  NMR spectrum (600 MHz) of compound **3v** in acetone- $d_6$ .

CARBON\_01  
20210730-HYT-6003-check

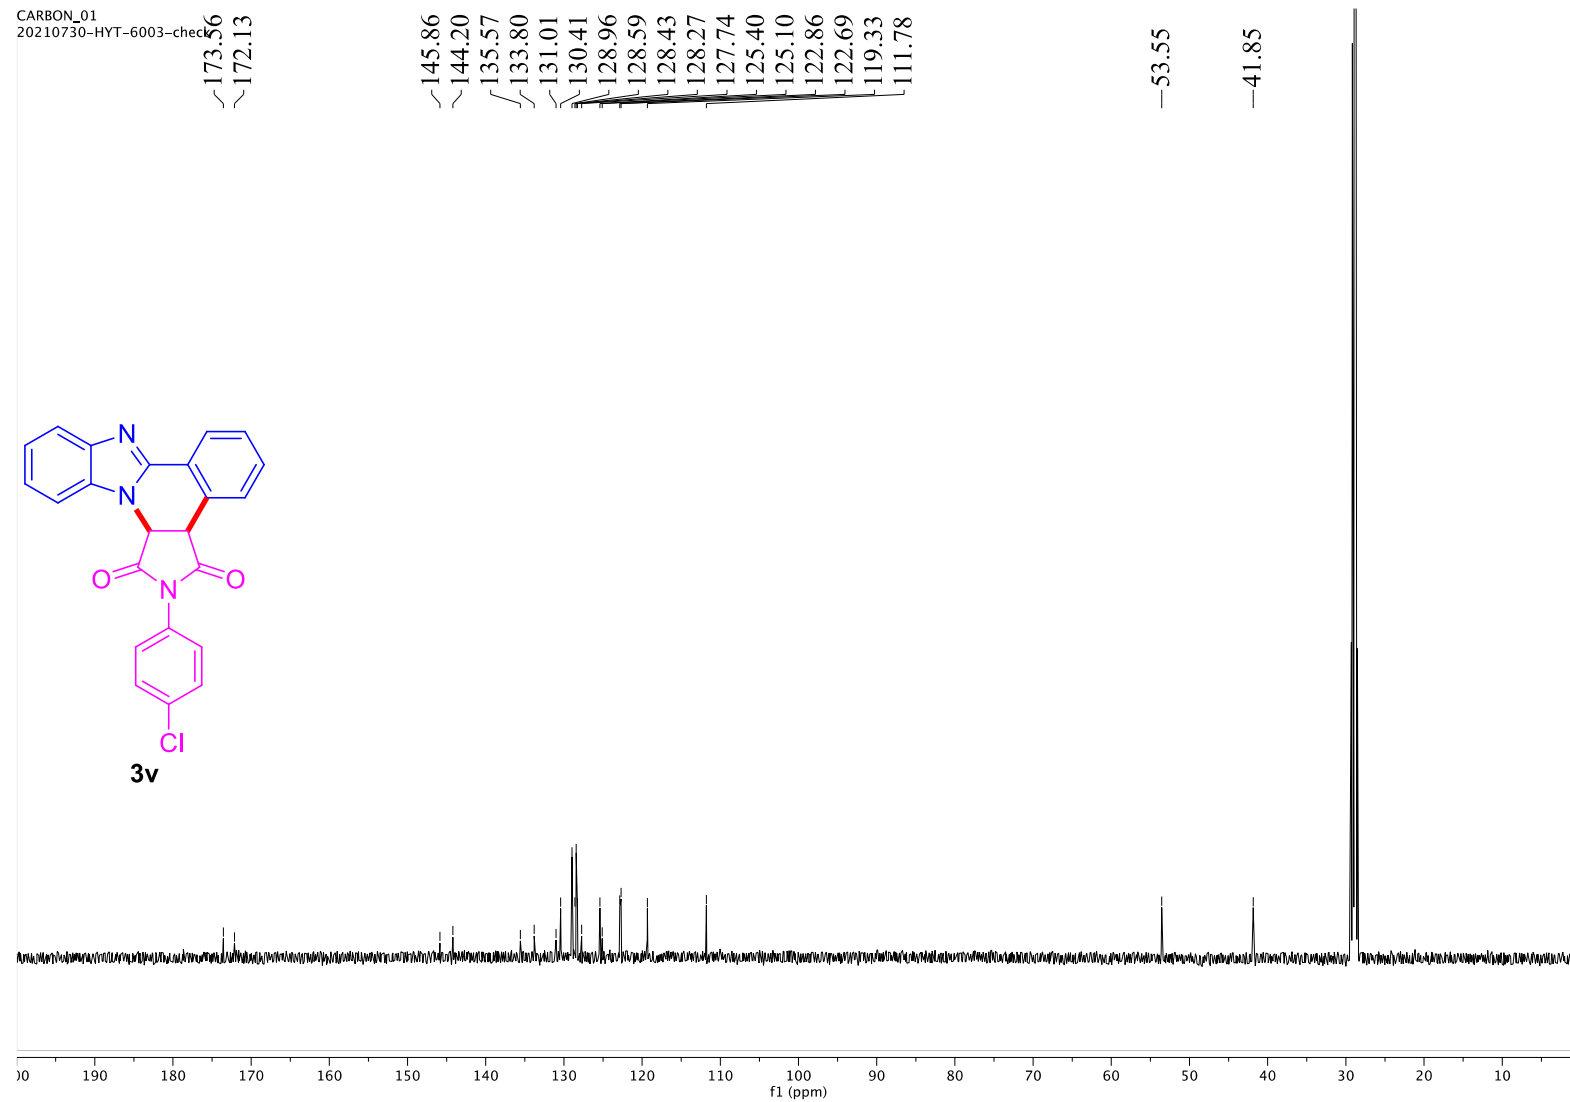

$^{13}\text{C}$  NMR spectrum (150 MHz) of compound **3v** in acetone- $d_6$ .

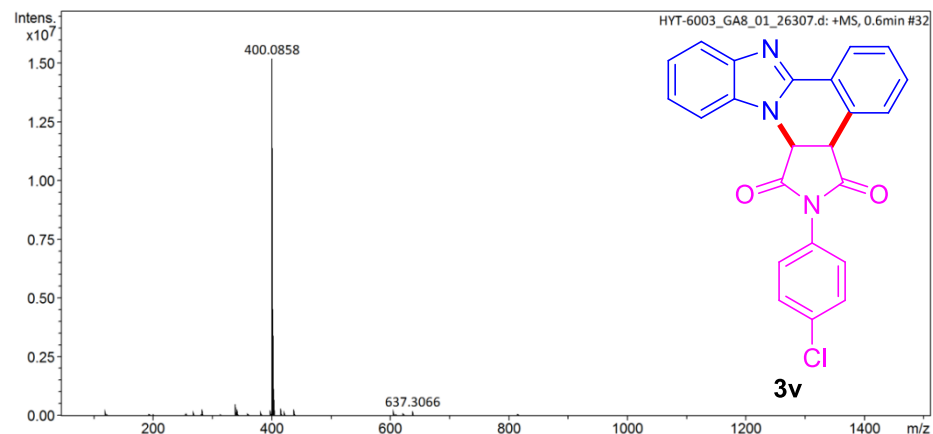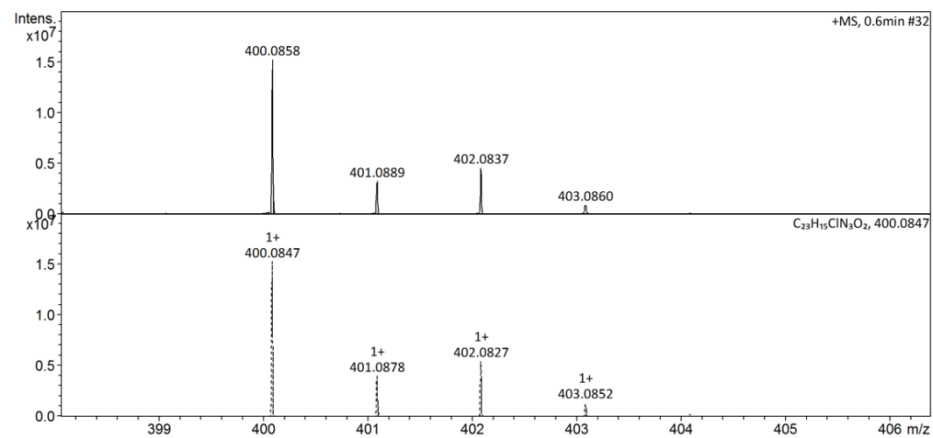

## Display Report

| Meas. m/z | # | Ion Formula                                                     | m/z      | err [ppm] | mSigma | # Sigma | Score  | rdb  | e <sup>-</sup> Conf | N-Rule | Adduct |
|-----------|---|-----------------------------------------------------------------|----------|-----------|--------|---------|--------|------|---------------------|--------|--------|
| 400.0858  | 1 | C <sub>23</sub> H <sub>15</sub> ClN <sub>3</sub> O <sub>2</sub> | 400.0847 | -2.8      | 36.2   | 1       | 100.00 | 17.5 | even                | ok     | M+H    |

HRMS (ESI) of compound **3v**.

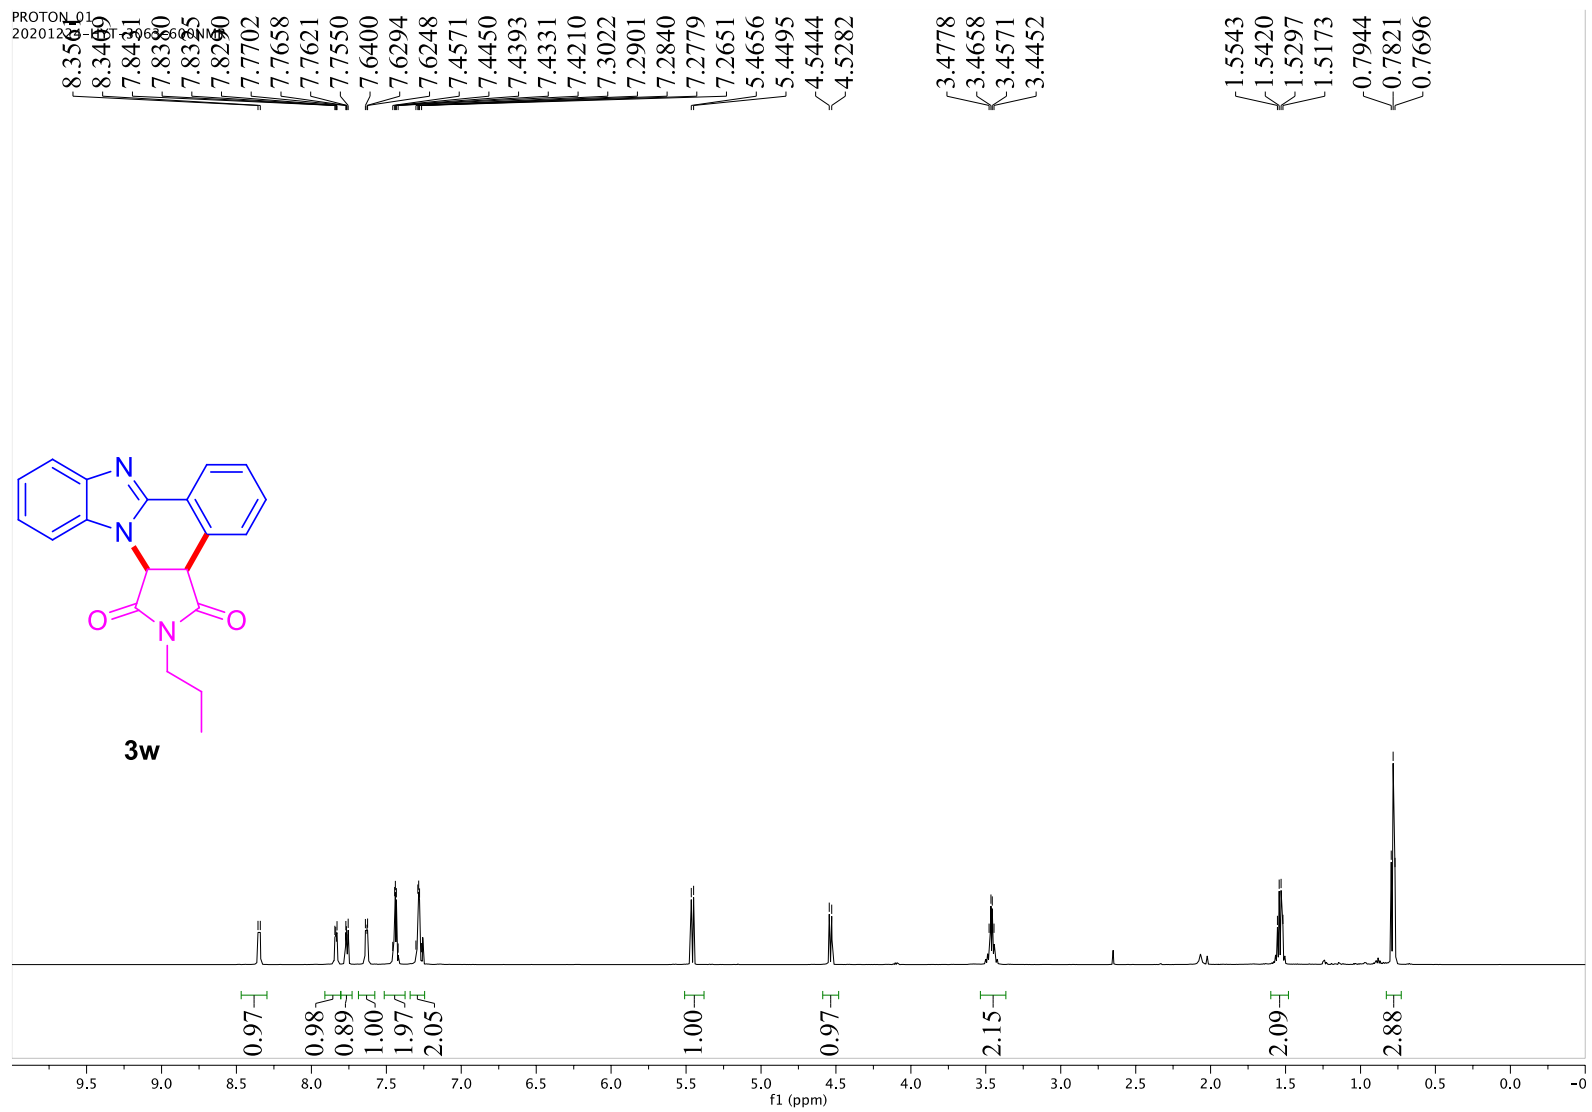

$^1\text{H}$  NMR spectrum (600 MHz) of compound **3w** in  $\text{CDCl}_3$ .

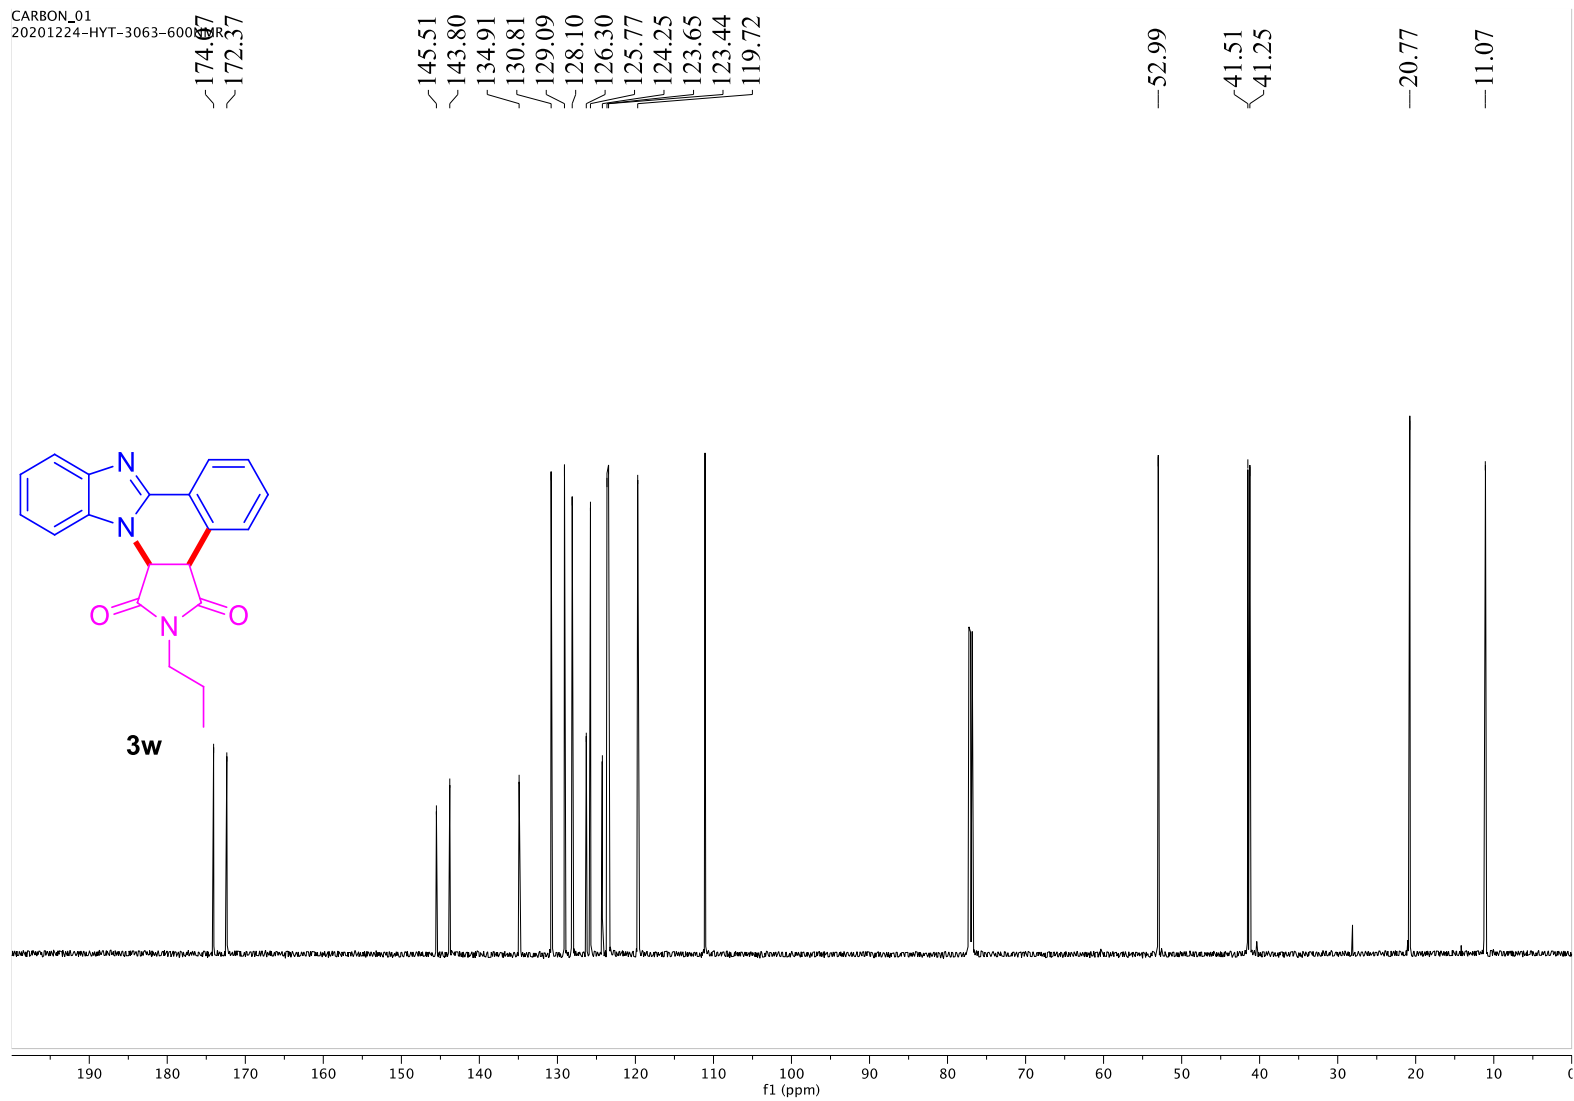

$^{13}\text{C}$  NMR spectrum (150 MHz) of compound **3w** in  $\text{CDCl}_3$ .

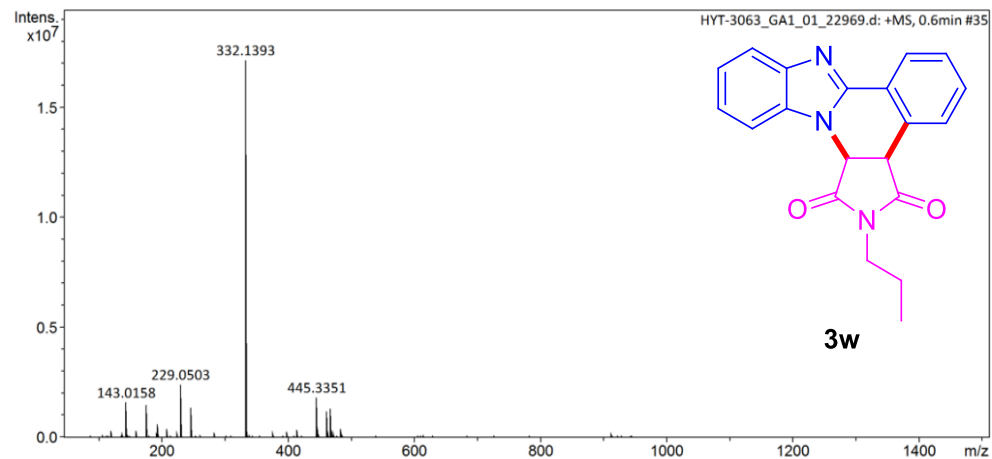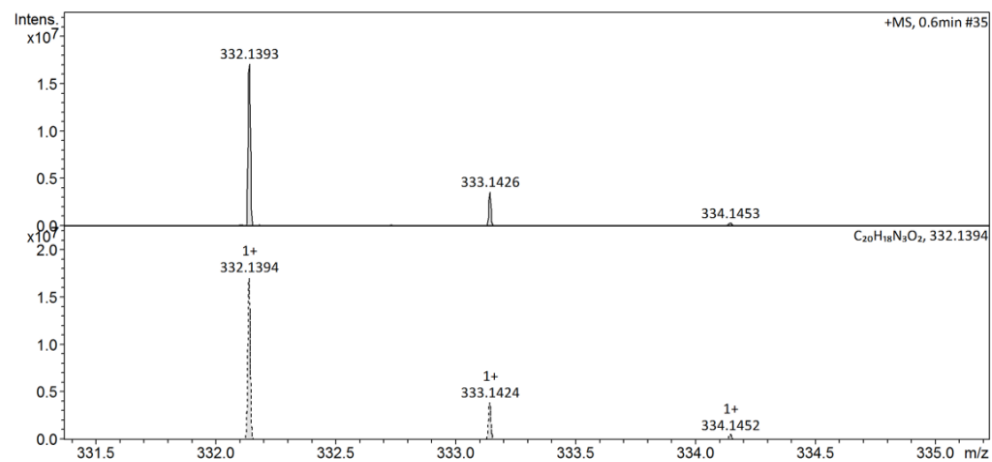

## Display Report

| Meas. m/z | # | Ion Formula                                                   | m/z      | err [ppm] | mSigma | # Sigma | Score  | rdb  | e <sup>-</sup> Conf | N-Rule | Adduct |
|-----------|---|---------------------------------------------------------------|----------|-----------|--------|---------|--------|------|---------------------|--------|--------|
| 332.1393  | 1 | C <sub>20</sub> H <sub>18</sub> N <sub>3</sub> O <sub>2</sub> | 332.1394 | 0.1       | 11.5   | 1       | 100.00 | 13.5 | even                | ok     | M+H    |

HRMS (ESI) of compound **3w**.



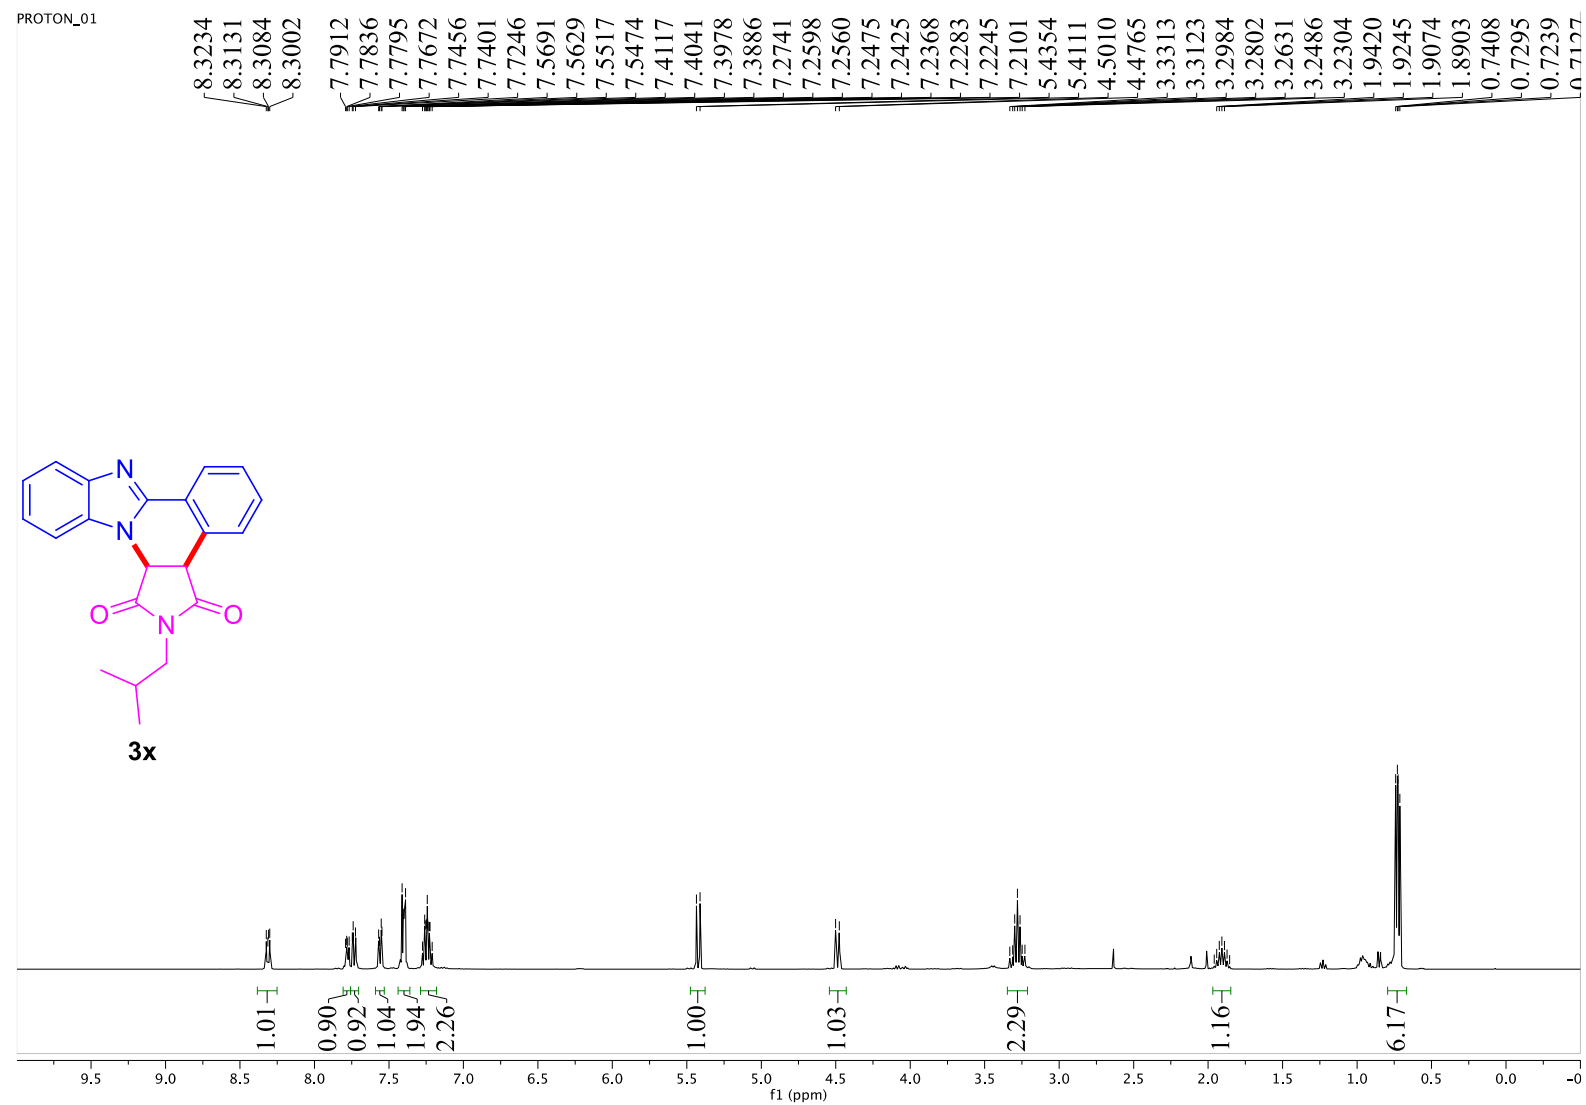

$^1\text{H}$  NMR spectrum (400 MHz) of compound **3x** in  $\text{CDCl}_3$ .

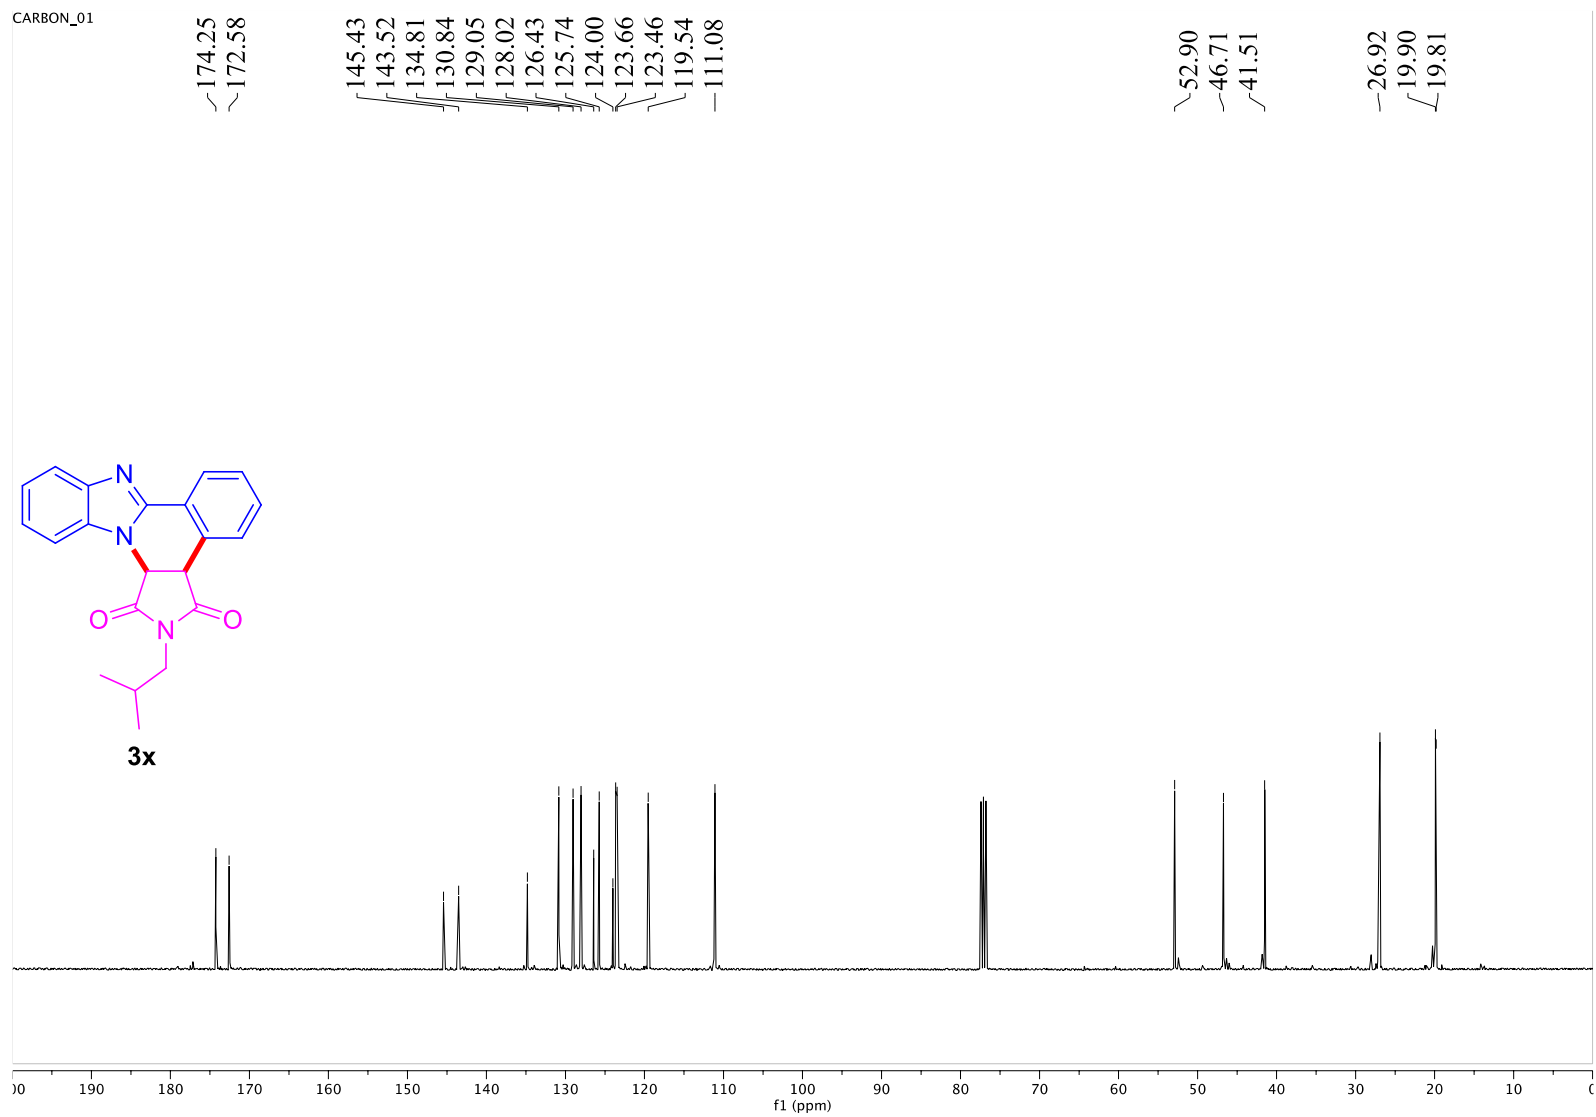

$^{13}\text{C}$  NMR spectrum (100 MHz) of compound **3x** in  $\text{CDCl}_3$ .

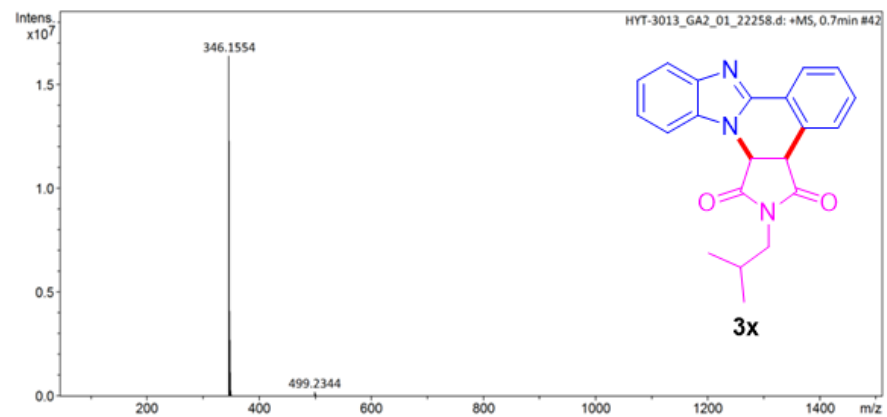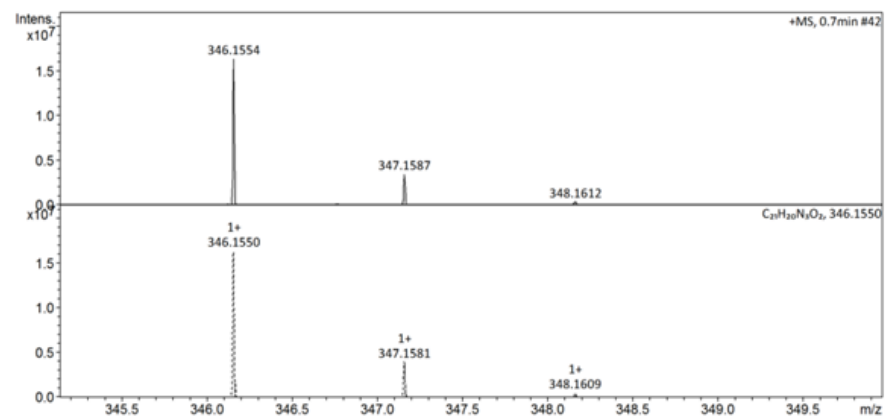

### Display Report

| Meas. m/z | # | Ion Formula                                                   | m/z      | err [ppm] | mSigma | # Sigma | Score  | rdb  | e <sup>-</sup> Conf | N-Rule | Adduct |
|-----------|---|---------------------------------------------------------------|----------|-----------|--------|---------|--------|------|---------------------|--------|--------|
| 346.1554  | 1 | C <sub>21</sub> H <sub>20</sub> N <sub>3</sub> O <sub>2</sub> | 346.1550 | 1.3       | 17.5   | 1       | 100.00 | 13.5 | even                | ok     | M+H    |

HRMS (ESI) of compound **3x**

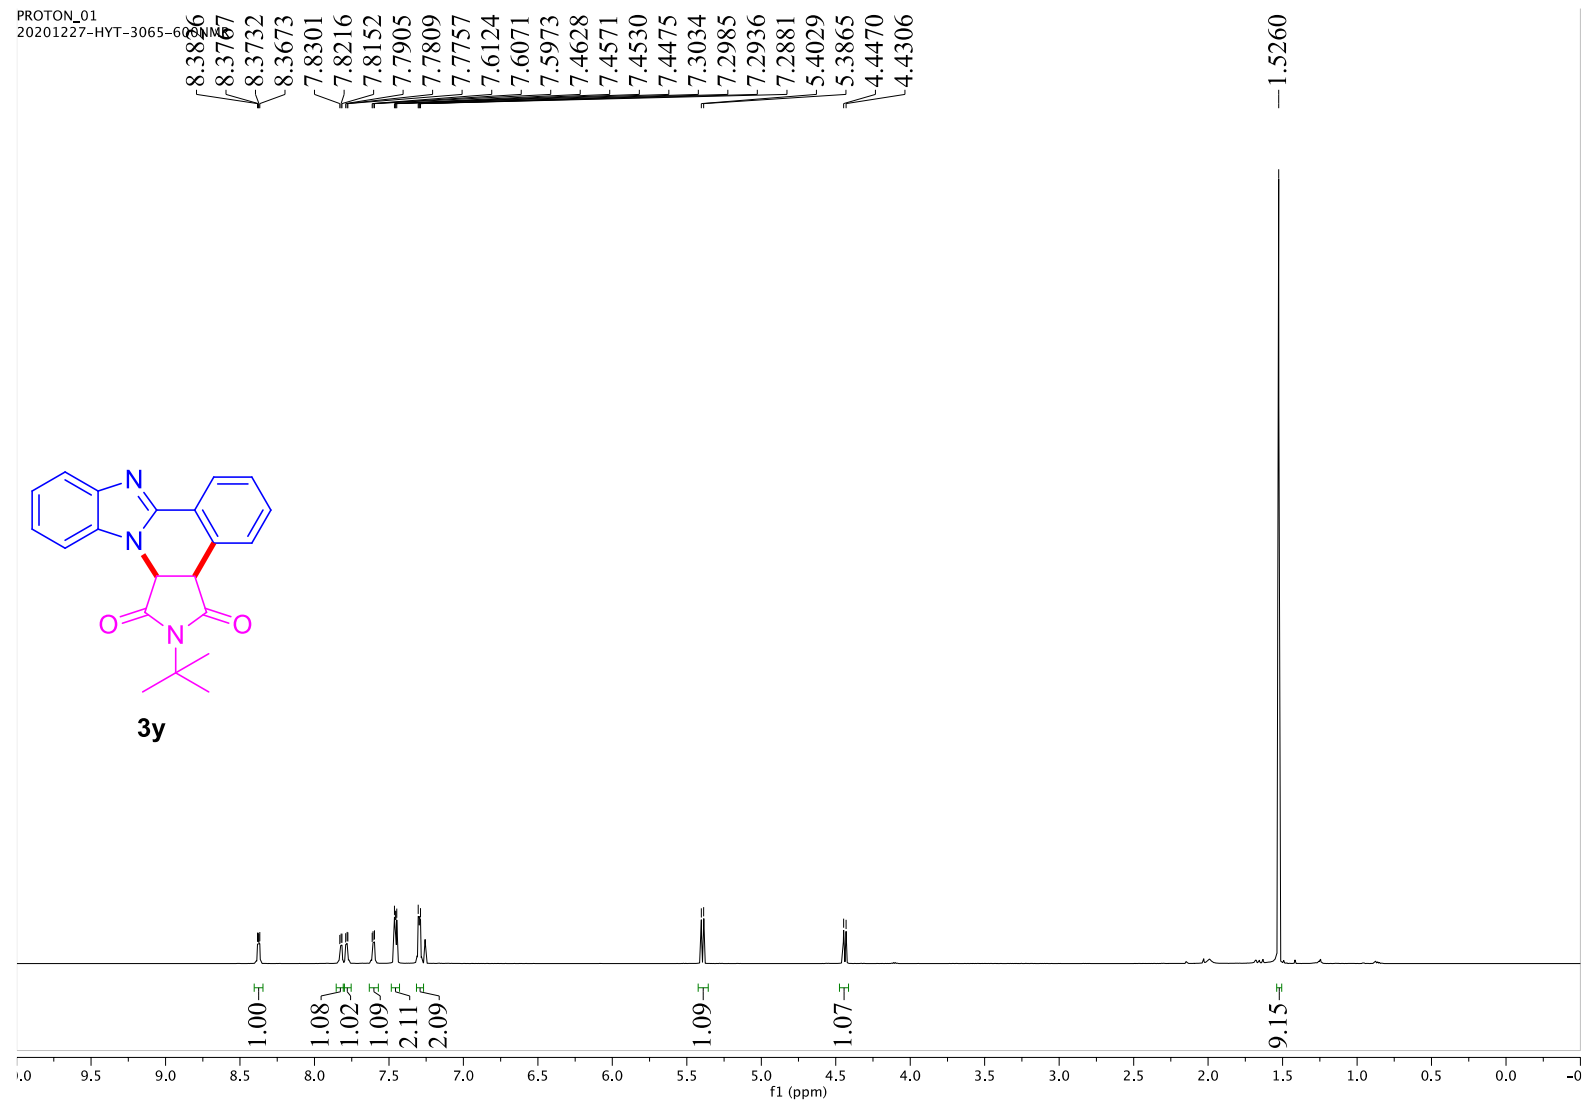

$^1\text{H}$  NMR spectrum (600 MHz) of compound **3y** in  $\text{CDCl}_3$ .

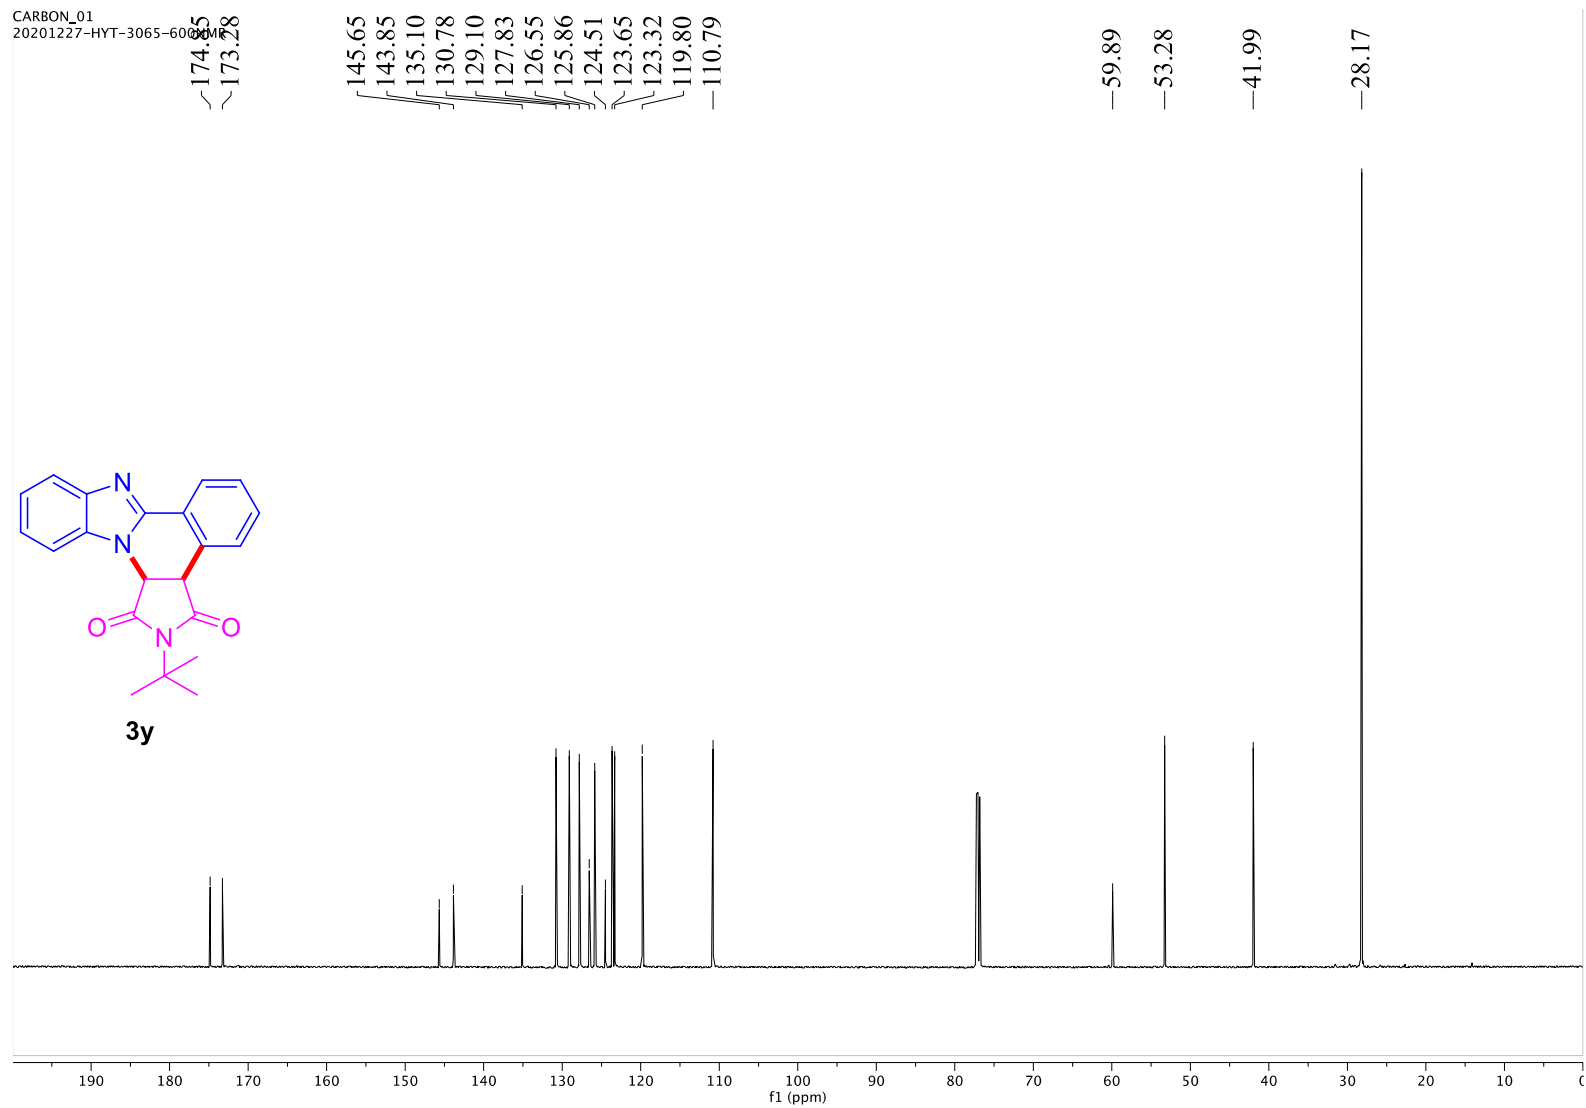

<sup>13</sup>C NMR spectrum (150 MHz) of compound **3y** in CDCl<sub>3</sub>.

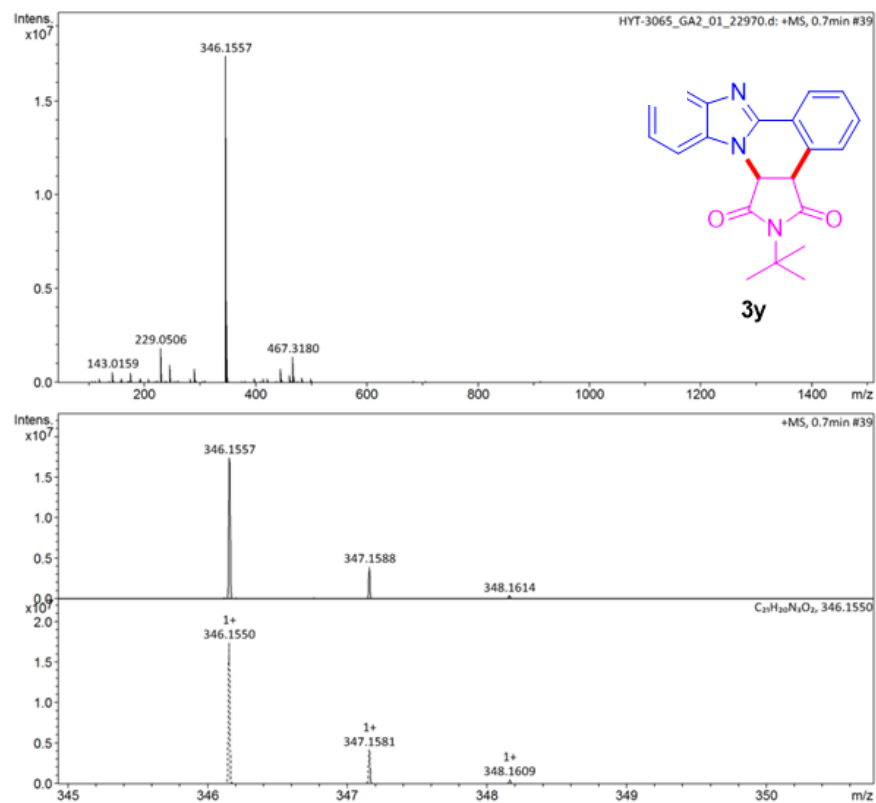

### Display Report

| Meas. m/z | # | Ion Formula                                                   | m/z      | err [ppm] | mSigma | # Sigma | Score  | rdb  | e <sup>-</sup> Conf | N-Rule | Adduct |
|-----------|---|---------------------------------------------------------------|----------|-----------|--------|---------|--------|------|---------------------|--------|--------|
| 346.1557  | 1 | C <sub>21</sub> H <sub>20</sub> N <sub>3</sub> O <sub>2</sub> | 346.1550 | -1.9      | 8.8    | 1       | 100.00 | 13.5 | even                | ok     | M+H    |

HRMS (ESI) of compound **3y**

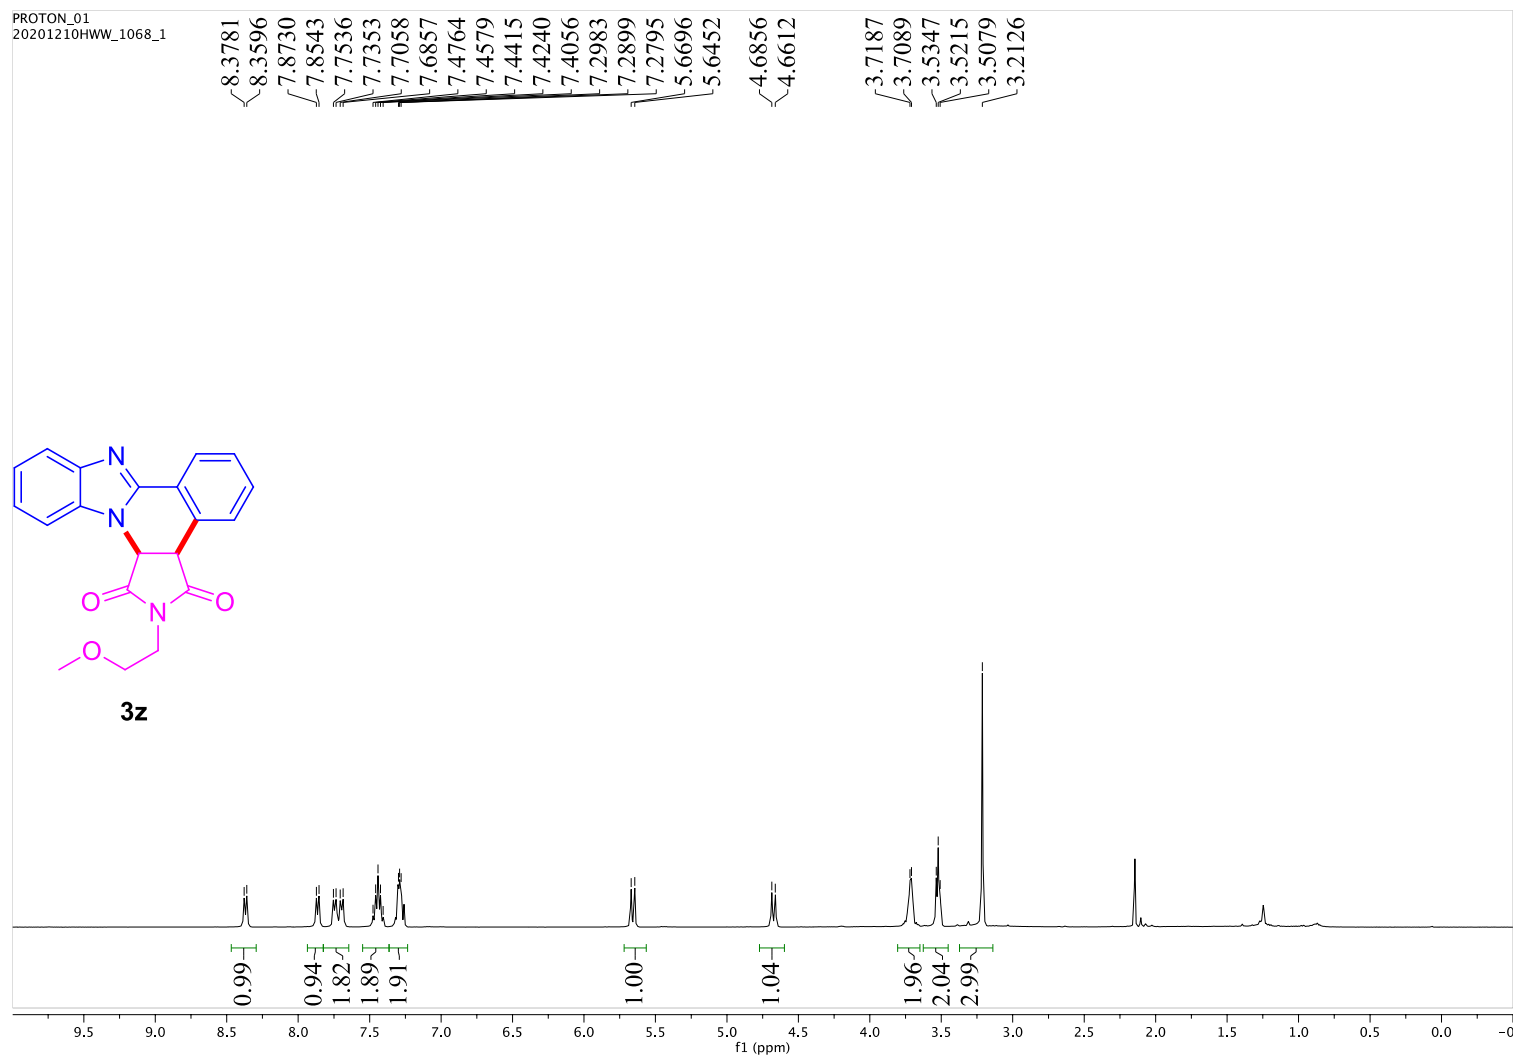

$^1\text{H}$  NMR spectrum (400 MHz) of compound **3z** in  $\text{CDCl}_3$ .

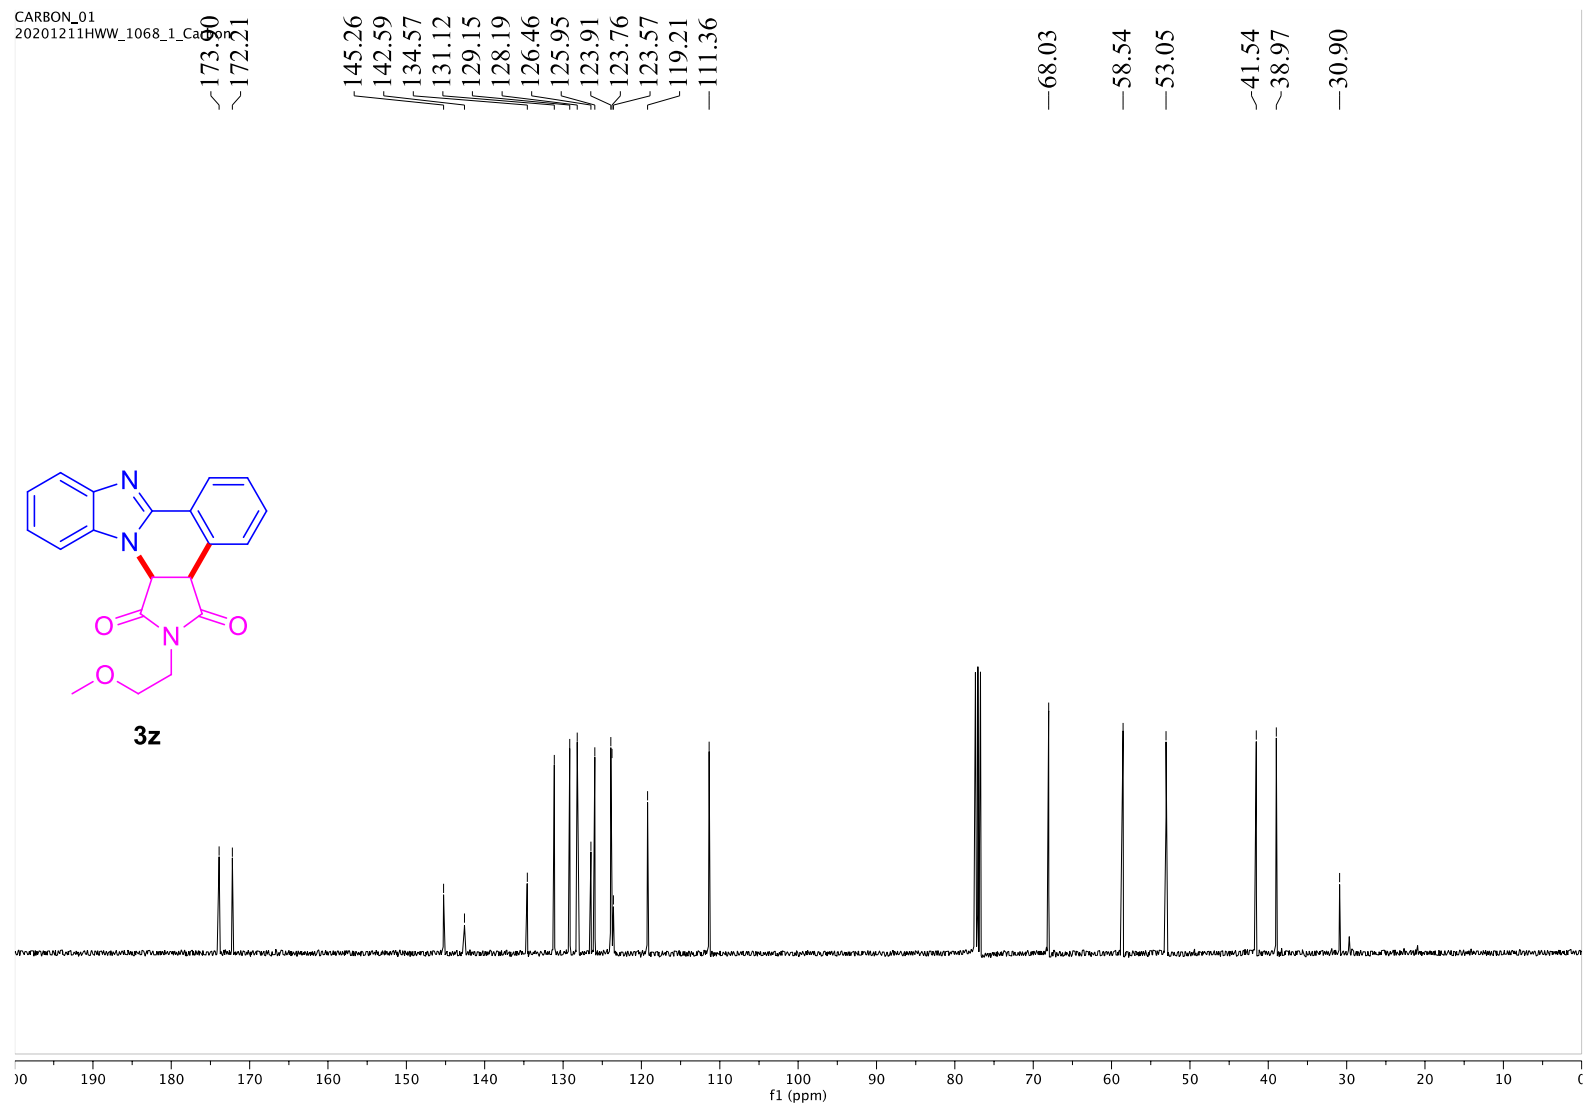

<sup>13</sup>C NMR spectrum (100 MHz) of compound **3z** in CDCl<sub>3</sub>.



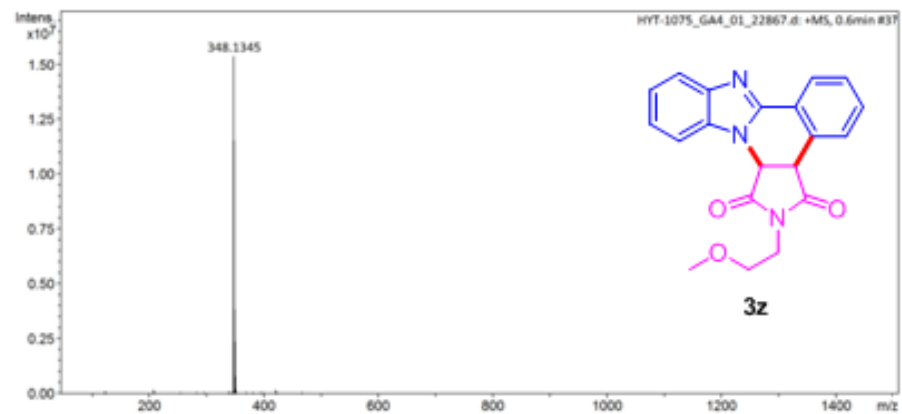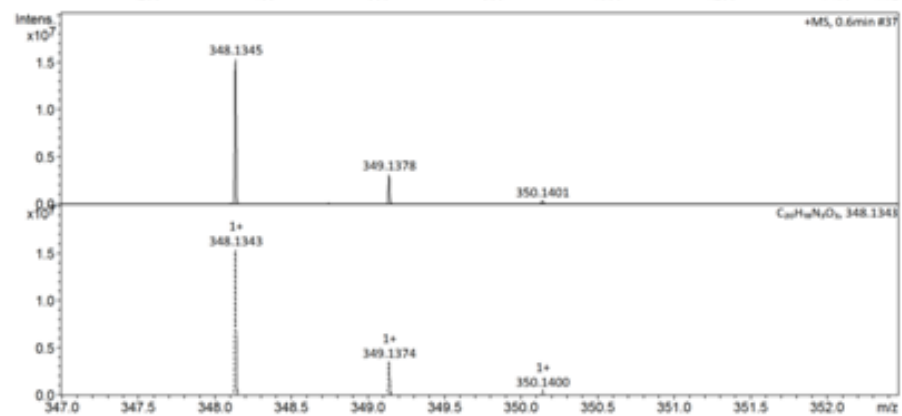

### Display Report

| Meas. m/z | # | Ion Formula                                                   | m/z      | err [ppm] | mSigma | # Sigma | Score  | rdb  | e <sup>-</sup> Conf | N-Rule | Adduct |
|-----------|---|---------------------------------------------------------------|----------|-----------|--------|---------|--------|------|---------------------|--------|--------|
| 348.1345  | 1 | C <sub>20</sub> H <sub>18</sub> N <sub>3</sub> O <sub>3</sub> | 348.1343 | 0.7       | 14.7   | 1       | 100.00 | 13.5 | even                | ok     | M+H    |

HRMS (ESI) of compound **3z**

PROTON\_01  
20201108-HYT-3009

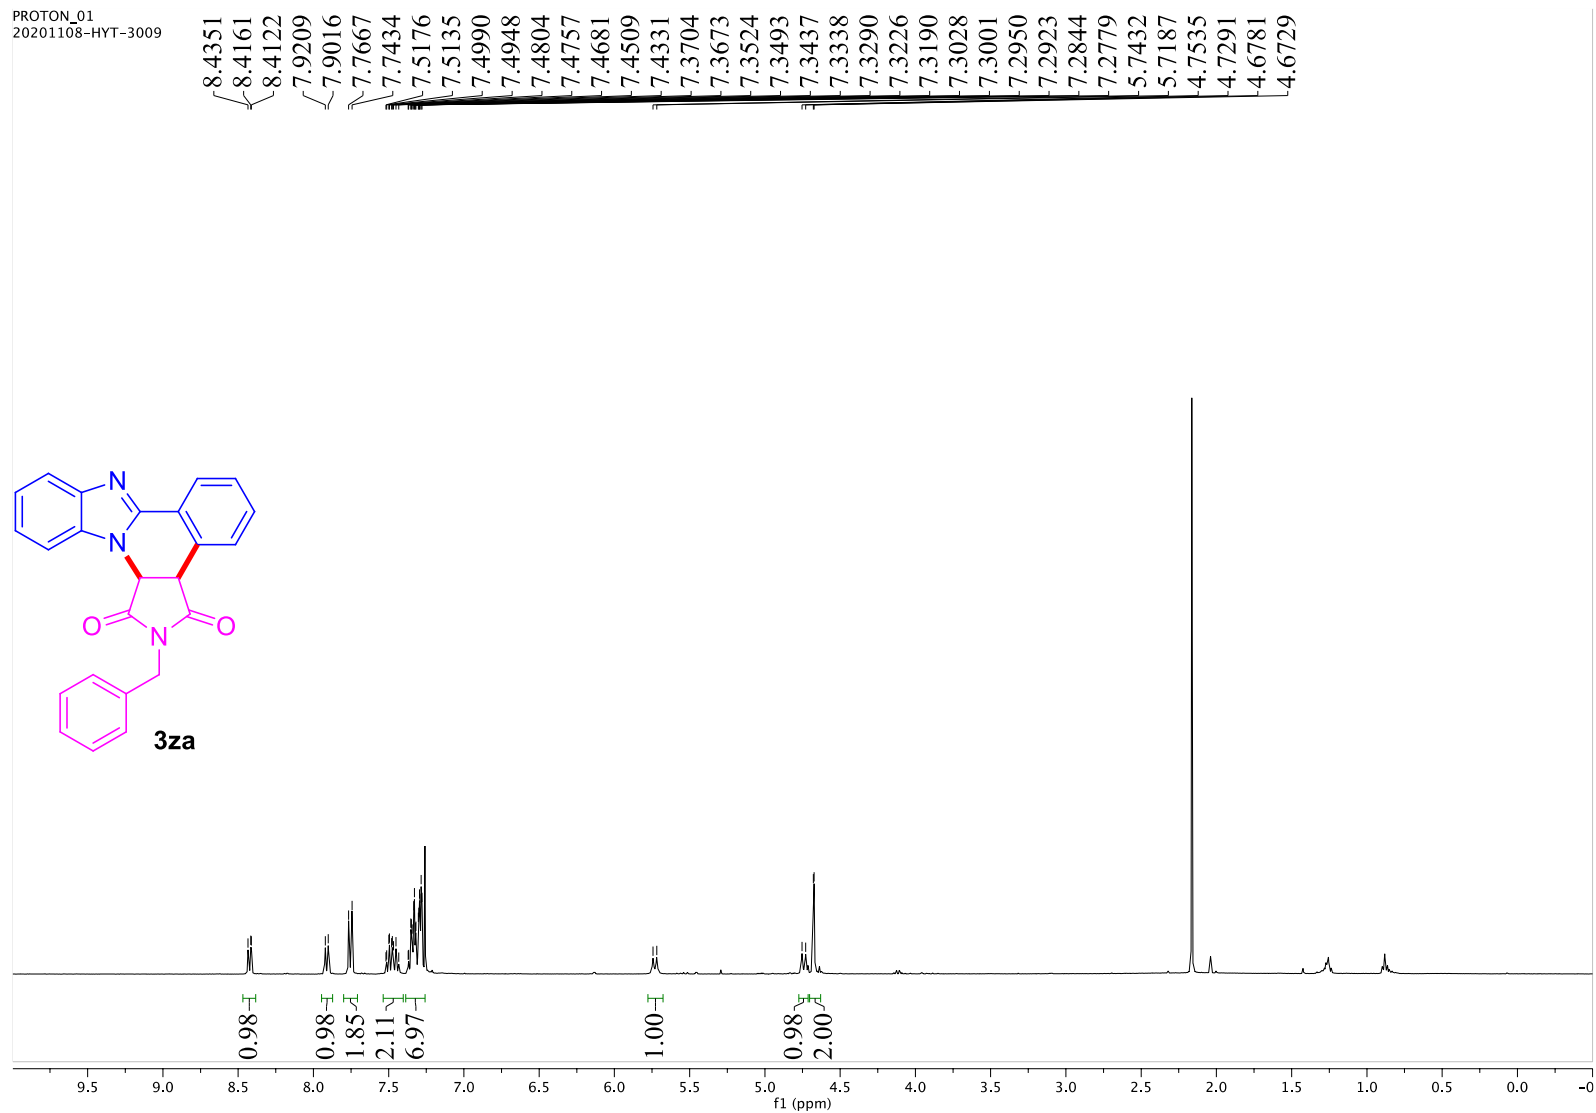

$^1\text{H}$  NMR spectrum (400 MHz) of compound **3za** in  $\text{CDCl}_3$ .

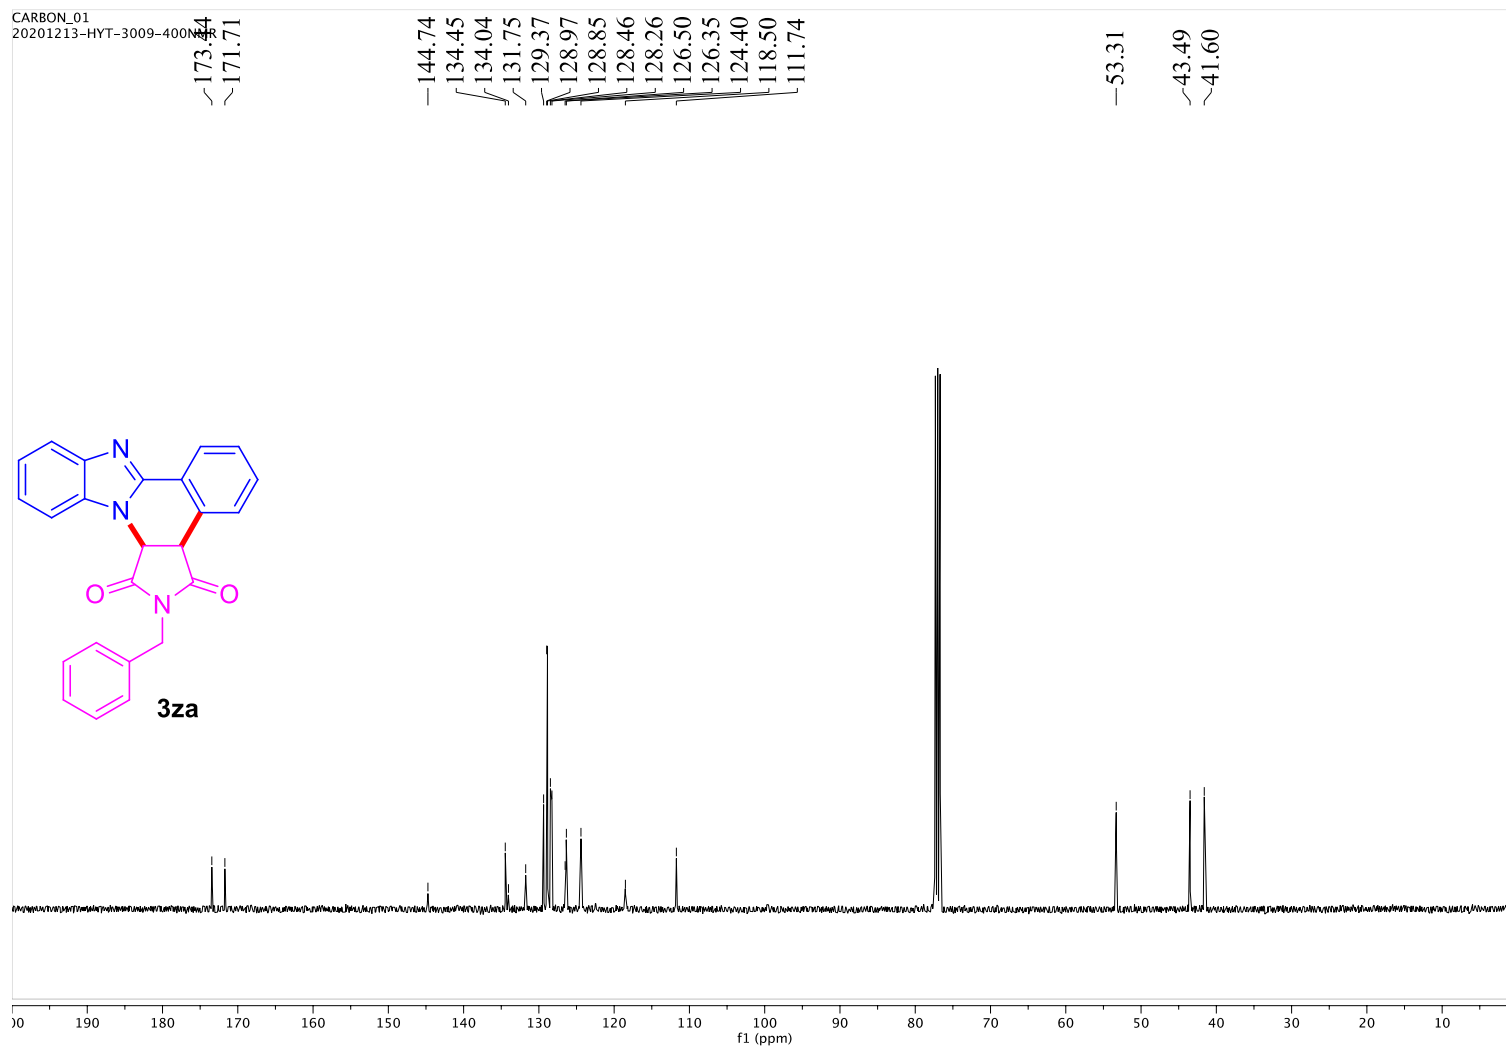

$^{13}\text{C}$  NMR spectrum (100 MHz) of compound **3za** in  $\text{CDCl}_3$ .

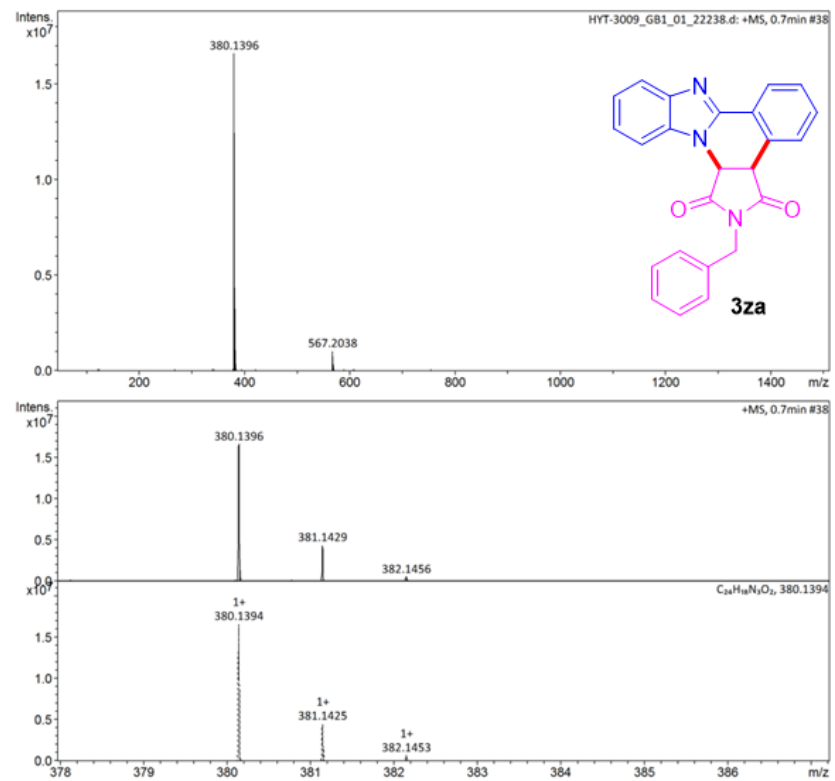

### Display Report

| Meas. m/z | # | Ion Formula                                                   | m/z      | err [ppm] | mSigma | # Sigma | Score  | rdb  | e <sup>-</sup> Conf | N-Rule | Adduct |
|-----------|---|---------------------------------------------------------------|----------|-----------|--------|---------|--------|------|---------------------|--------|--------|
| 380.1396  | 1 | C <sub>24</sub> H <sub>18</sub> N <sub>2</sub> O <sub>2</sub> | 380.1394 | 0.6       | 7.0    | 1       | 100.00 | 17.5 | even                | ok     | M+H    |

HRMS (ESI) of compound **3za**

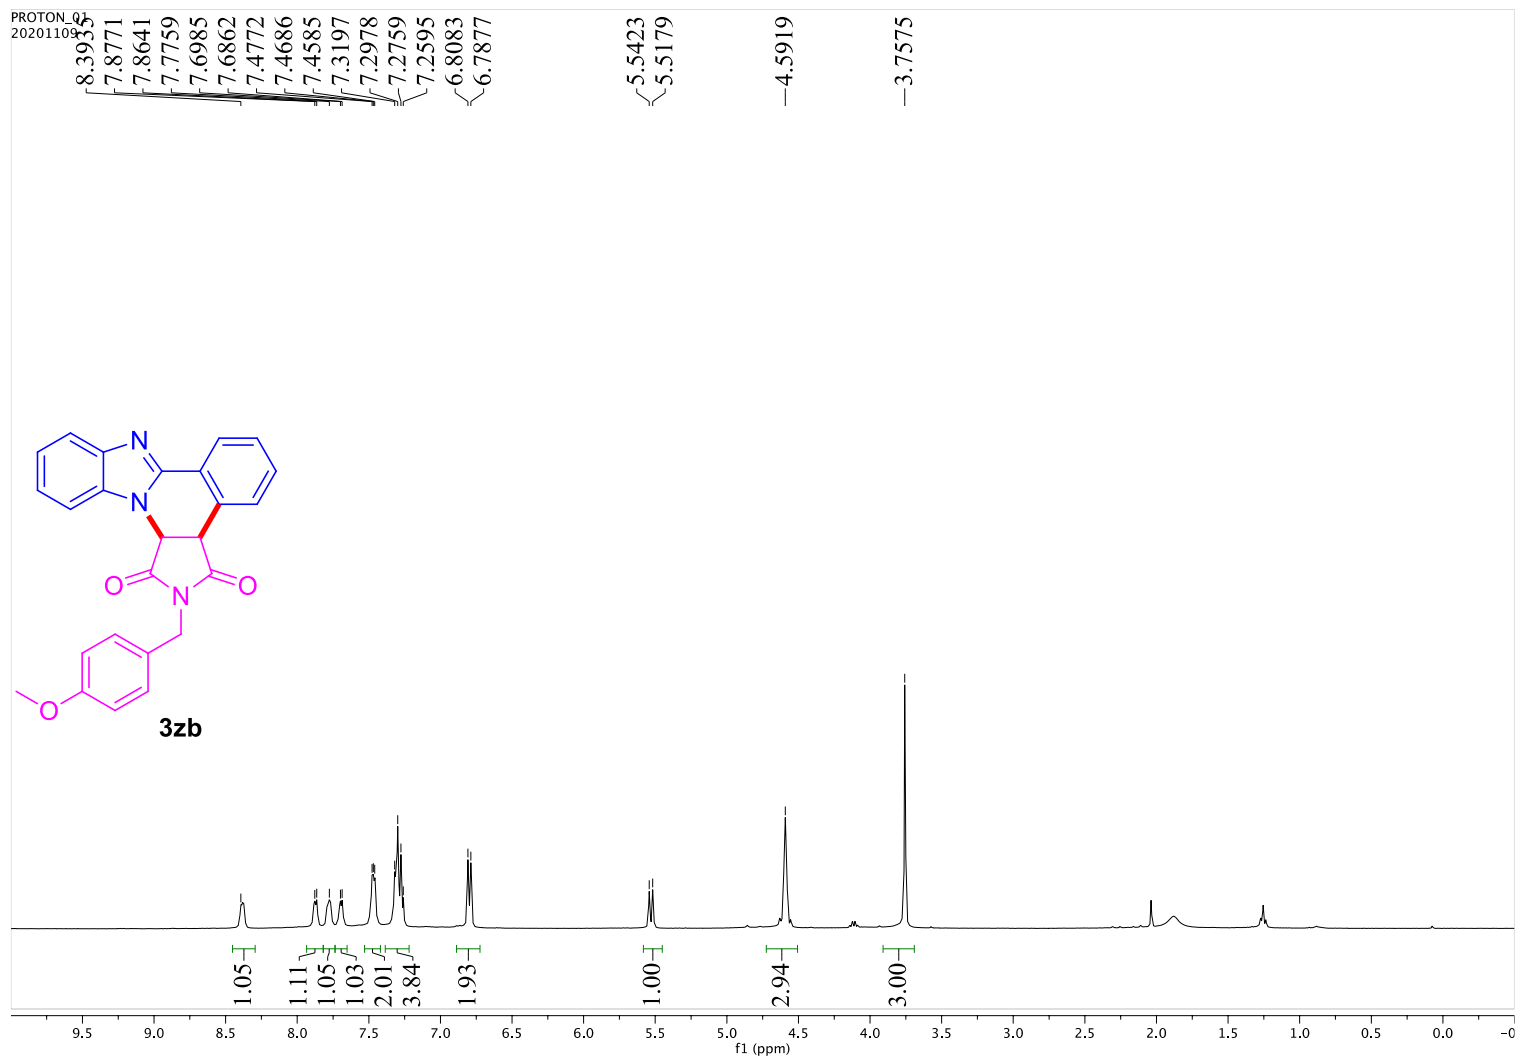

$^1\text{H}$  NMR spectrum (400 MHz) of compound **3zb** in  $\text{CDCl}_3$ .

CARBON\_01  
20201109

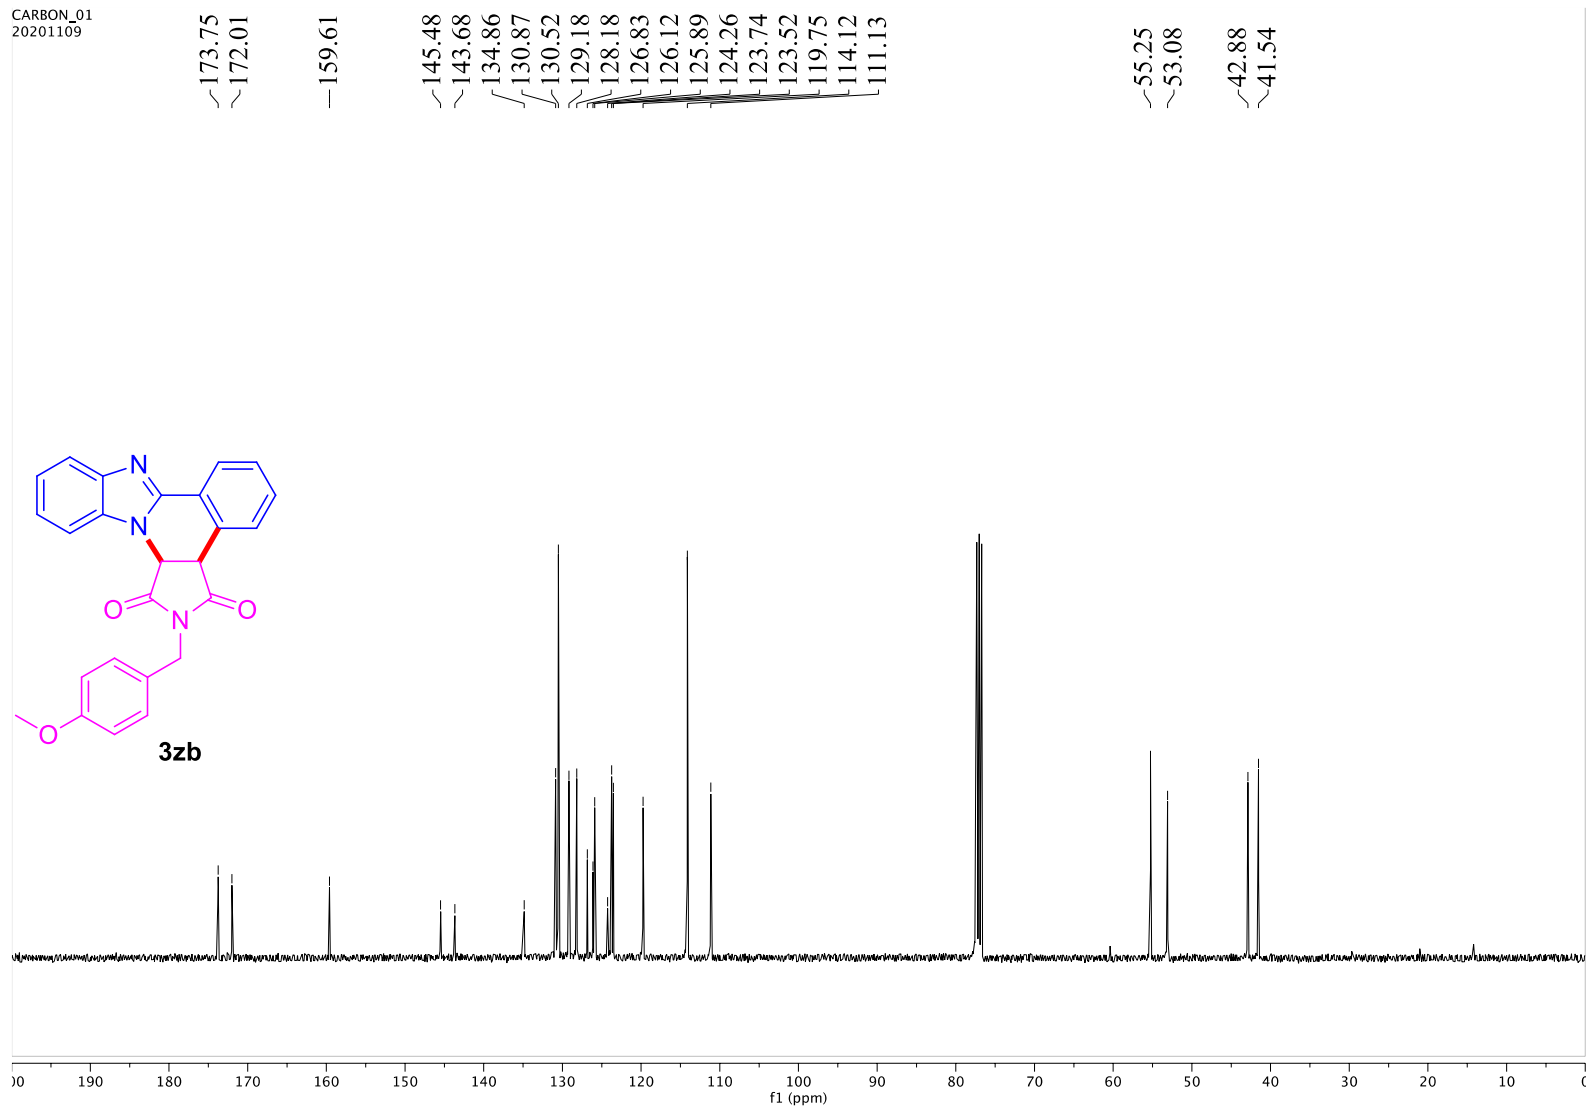

$^{13}\text{C}$  NMR spectrum (100 MHz) of compound **3zb** in  $\text{CDCl}_3$ .

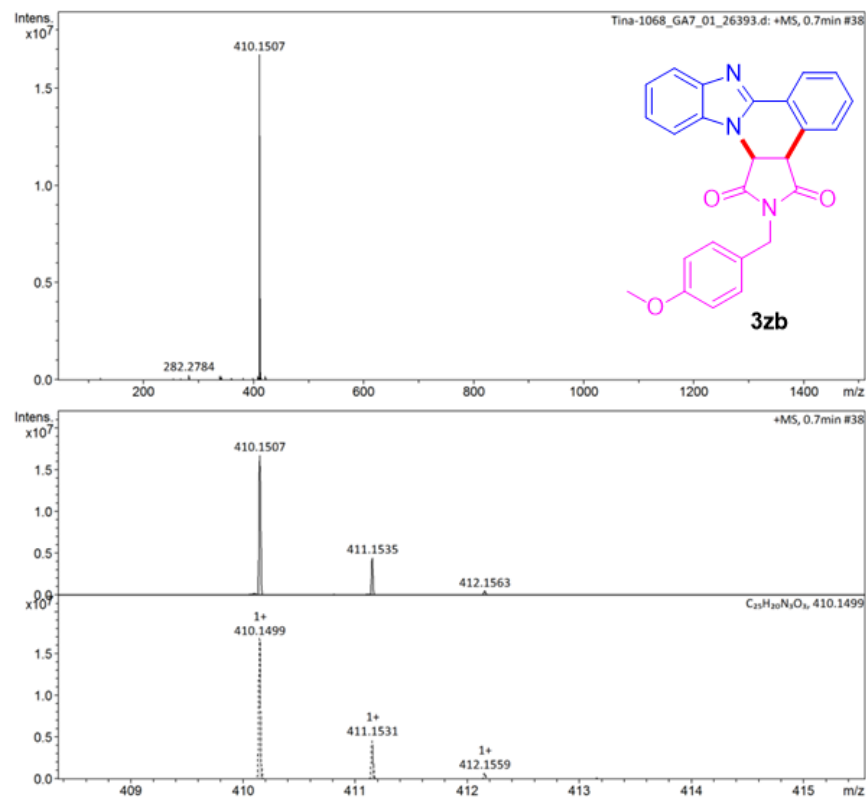

### Display Report

| Meas. m/z | # | Ion Formula                                                   | m/z      | err [ppm] | mSigma | # Sigma | Score  | rdb  | e <sup>-</sup> Conf | N-Rule | Adduct |
|-----------|---|---------------------------------------------------------------|----------|-----------|--------|---------|--------|------|---------------------|--------|--------|
| 410.1507  | 1 | C <sub>25</sub> H <sub>20</sub> N <sub>3</sub> O <sub>3</sub> | 410.1499 | -1.8      | 9.7    | 1       | 100.00 | 17.5 | even                | ok     | M+H    |

HRMS (ESI) of compound **3zb**

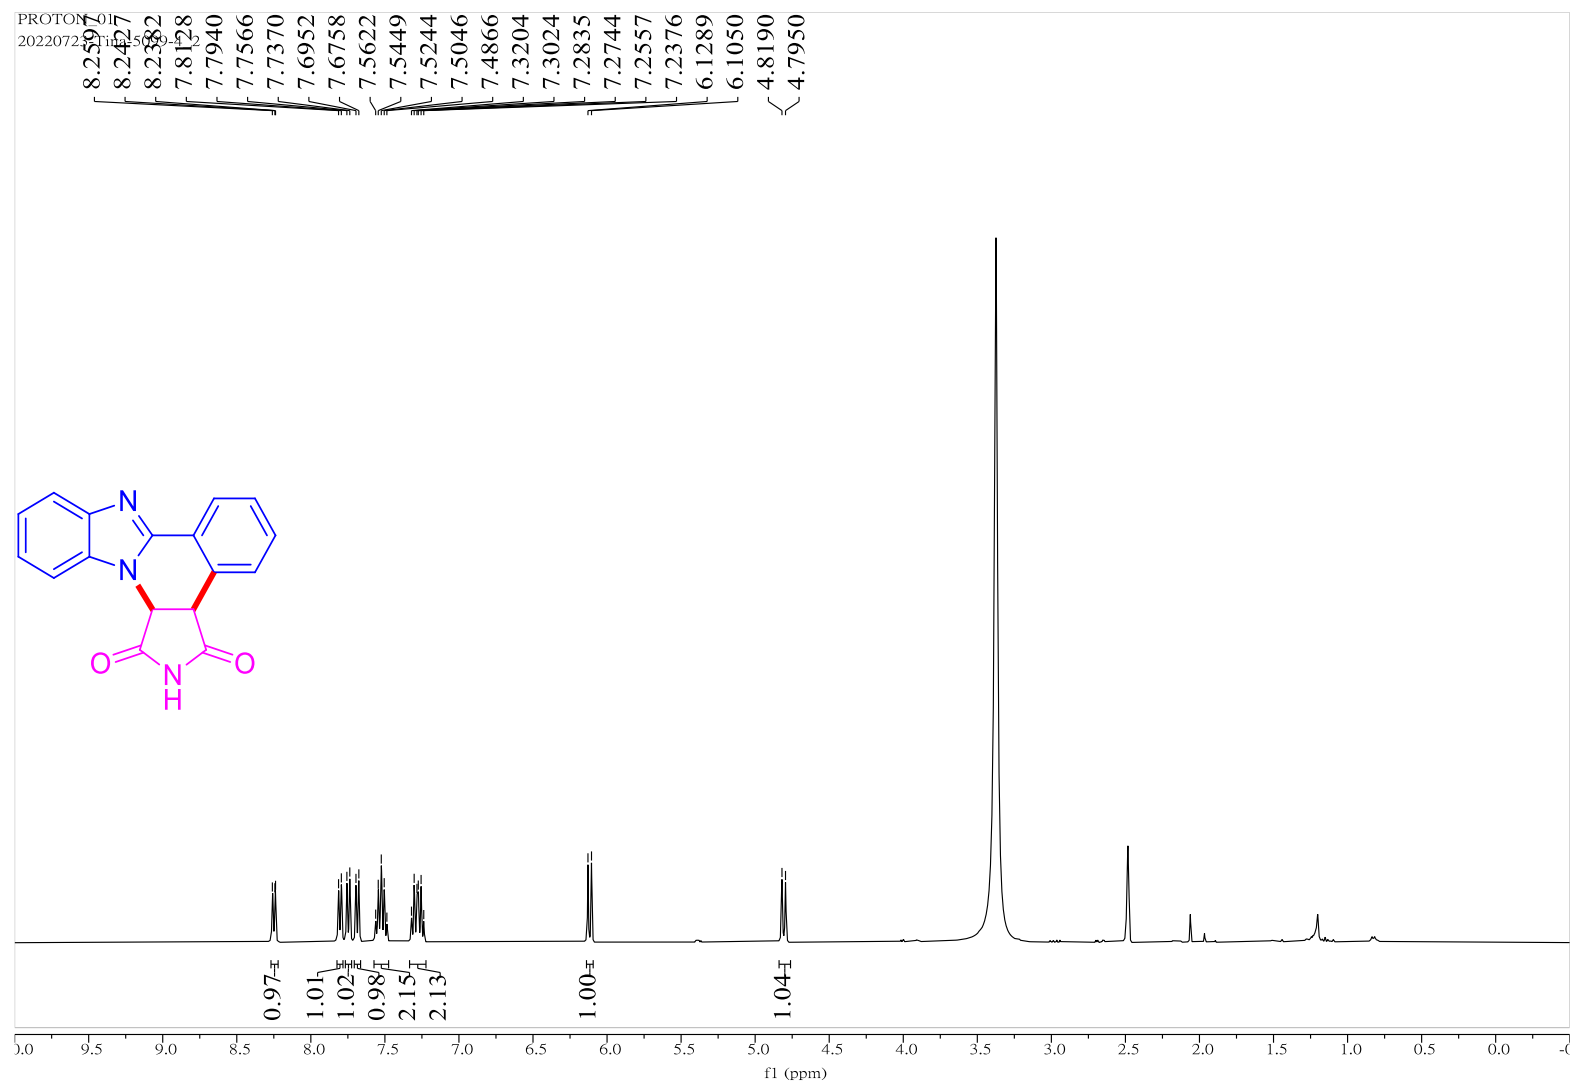

$^1\text{H}$  NMR spectrum (400 MHz) of compound **3zc** in  $\text{DMSO-}d_6$ .



CARBON\_01  
20220723-Tina-5099-4\_2

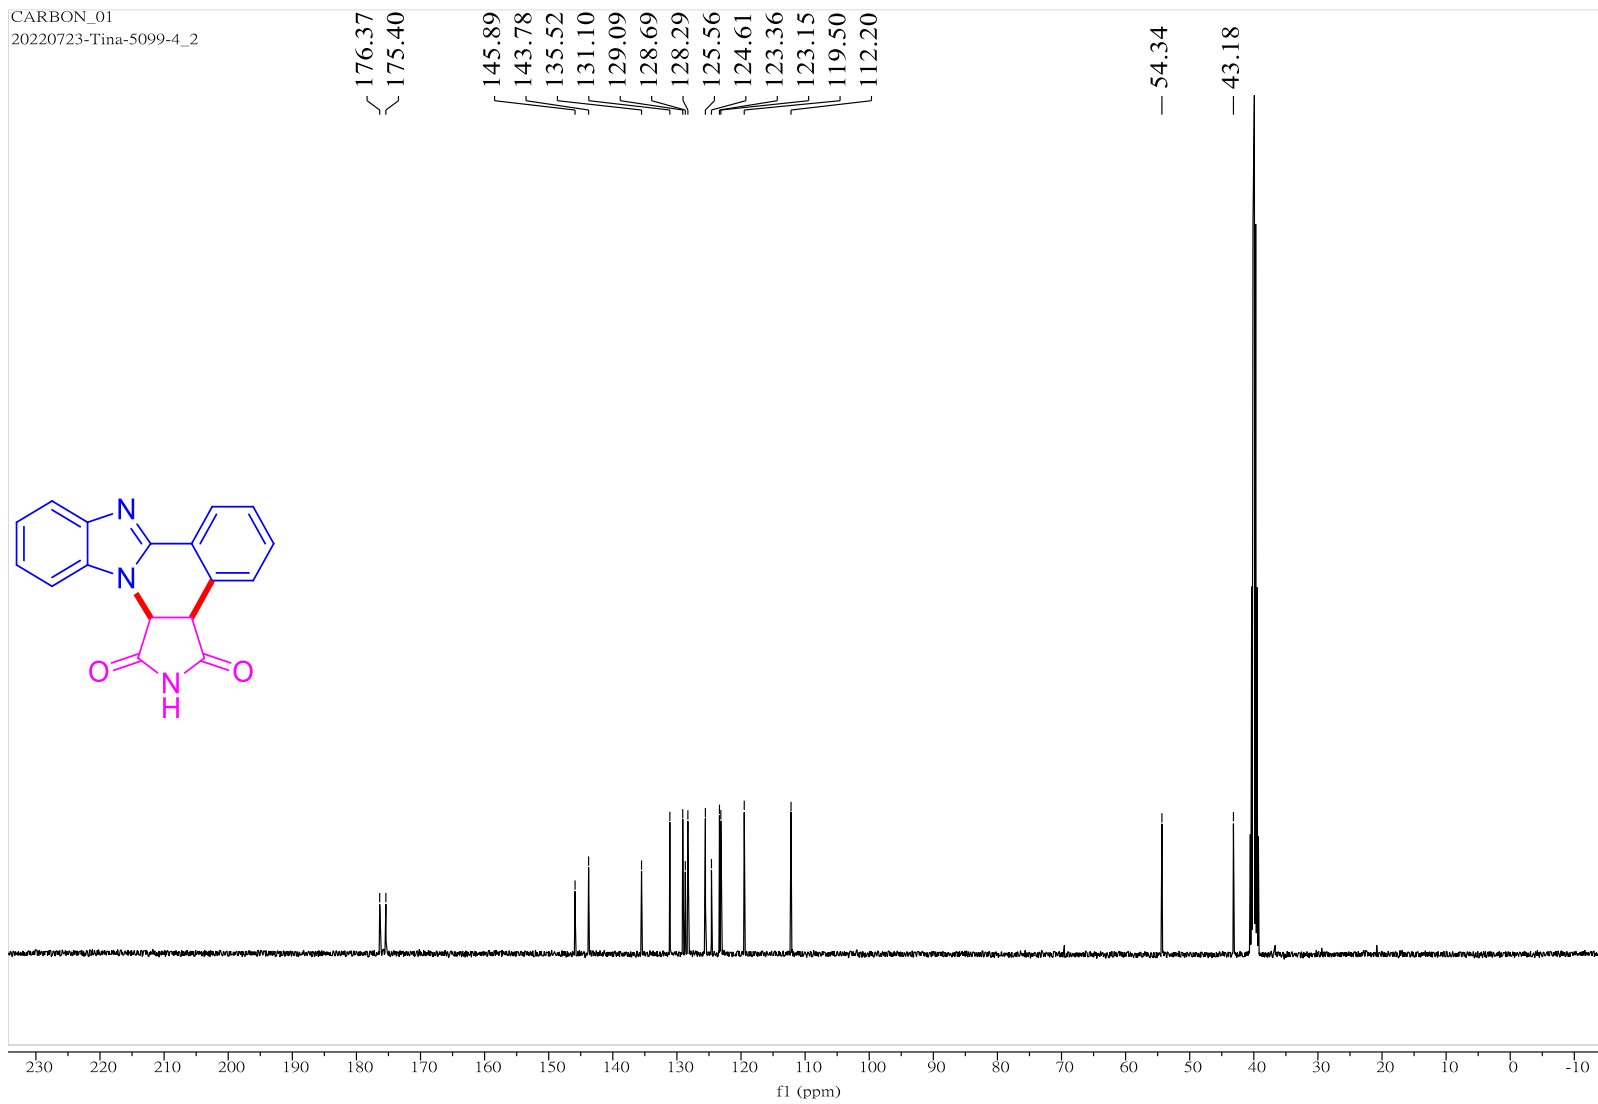

$^{13}\text{C}$  NMR spectrum (150 MHz) of compound **3zc** in  $\text{DMSO-}d_6$ .

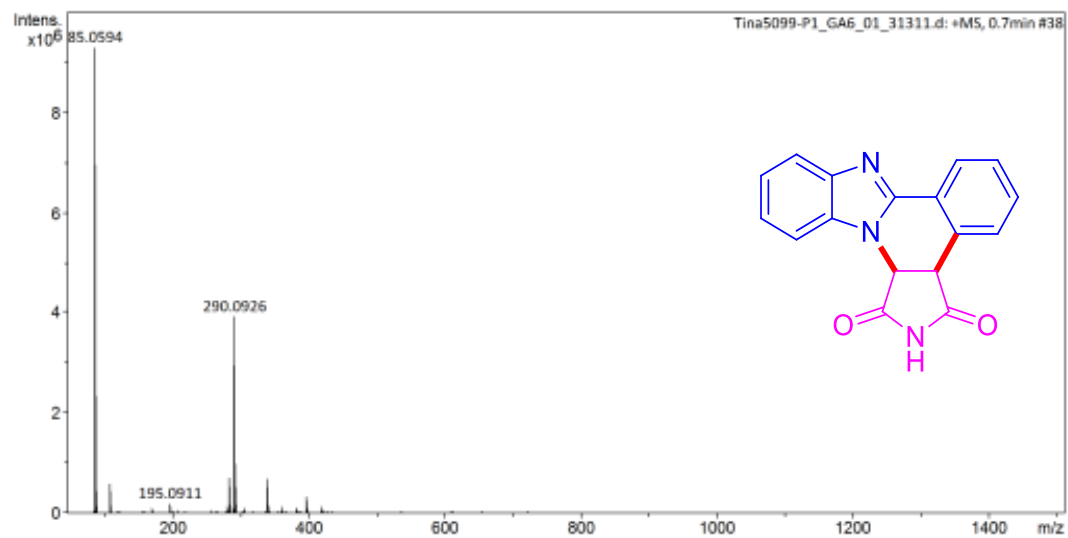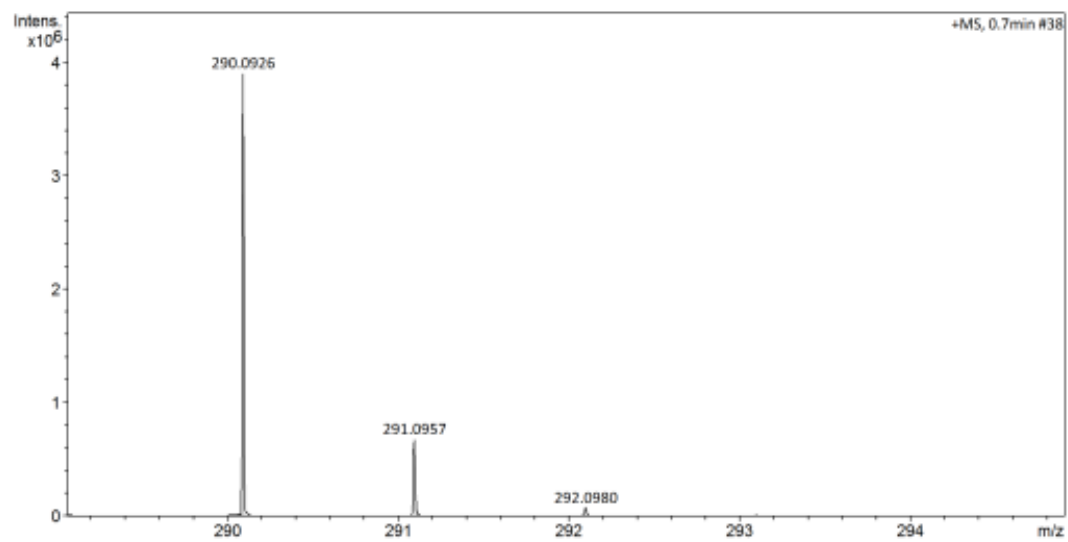

HRMS (ESI) of compound **3zc**

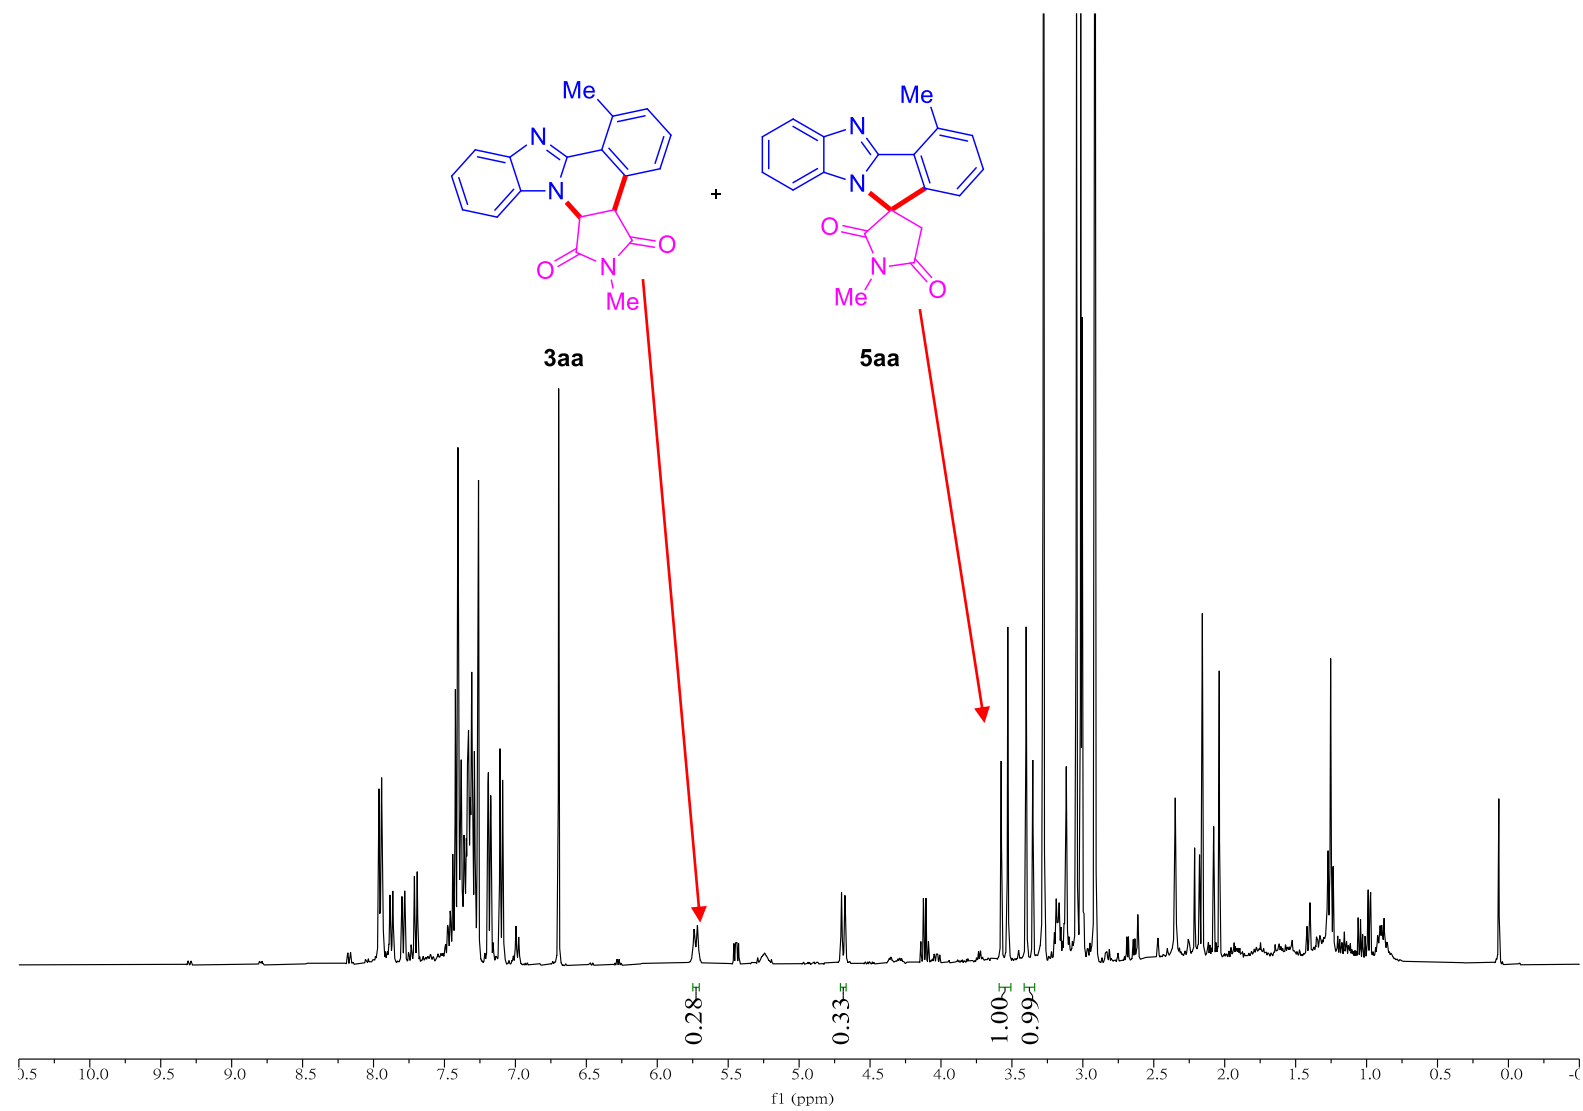

$^1\text{H}$  NMR spectrum (400 MHz) of compound **3aa** and **5aa** in  $\text{CDCl}_3$ .

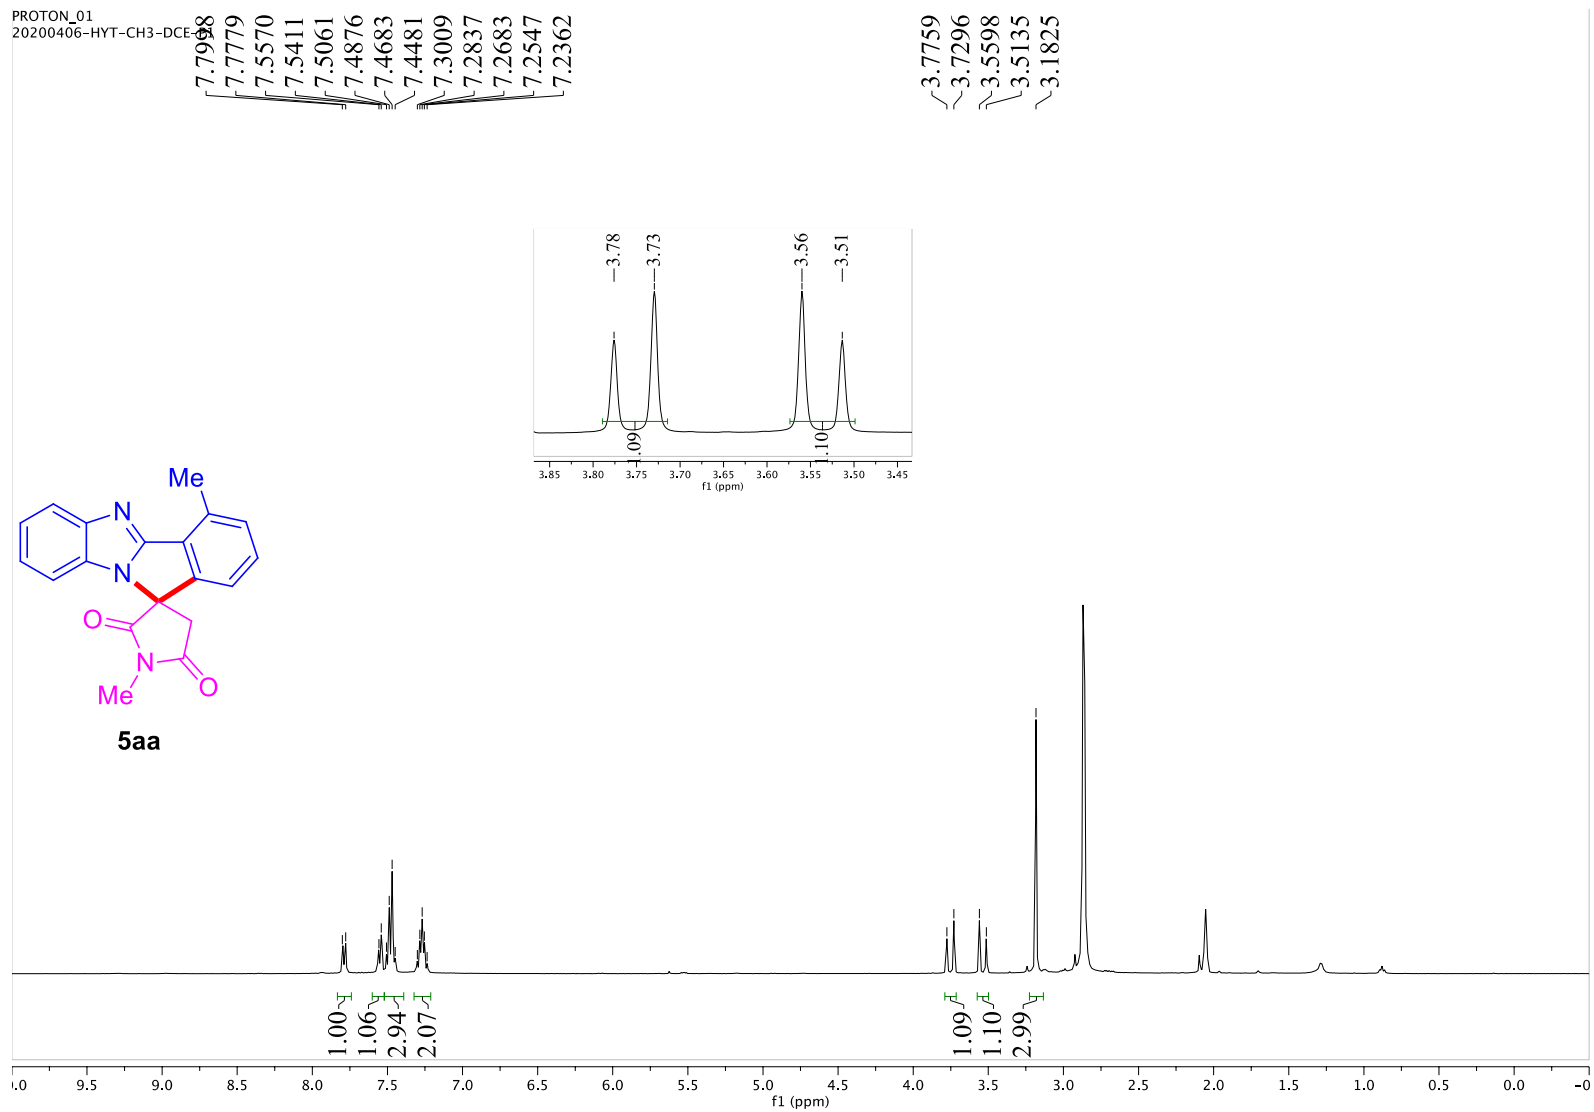

$^1\text{H}$  NMR spectrum (400 MHz) of compound **5aa** in acetone- $d_6$ .

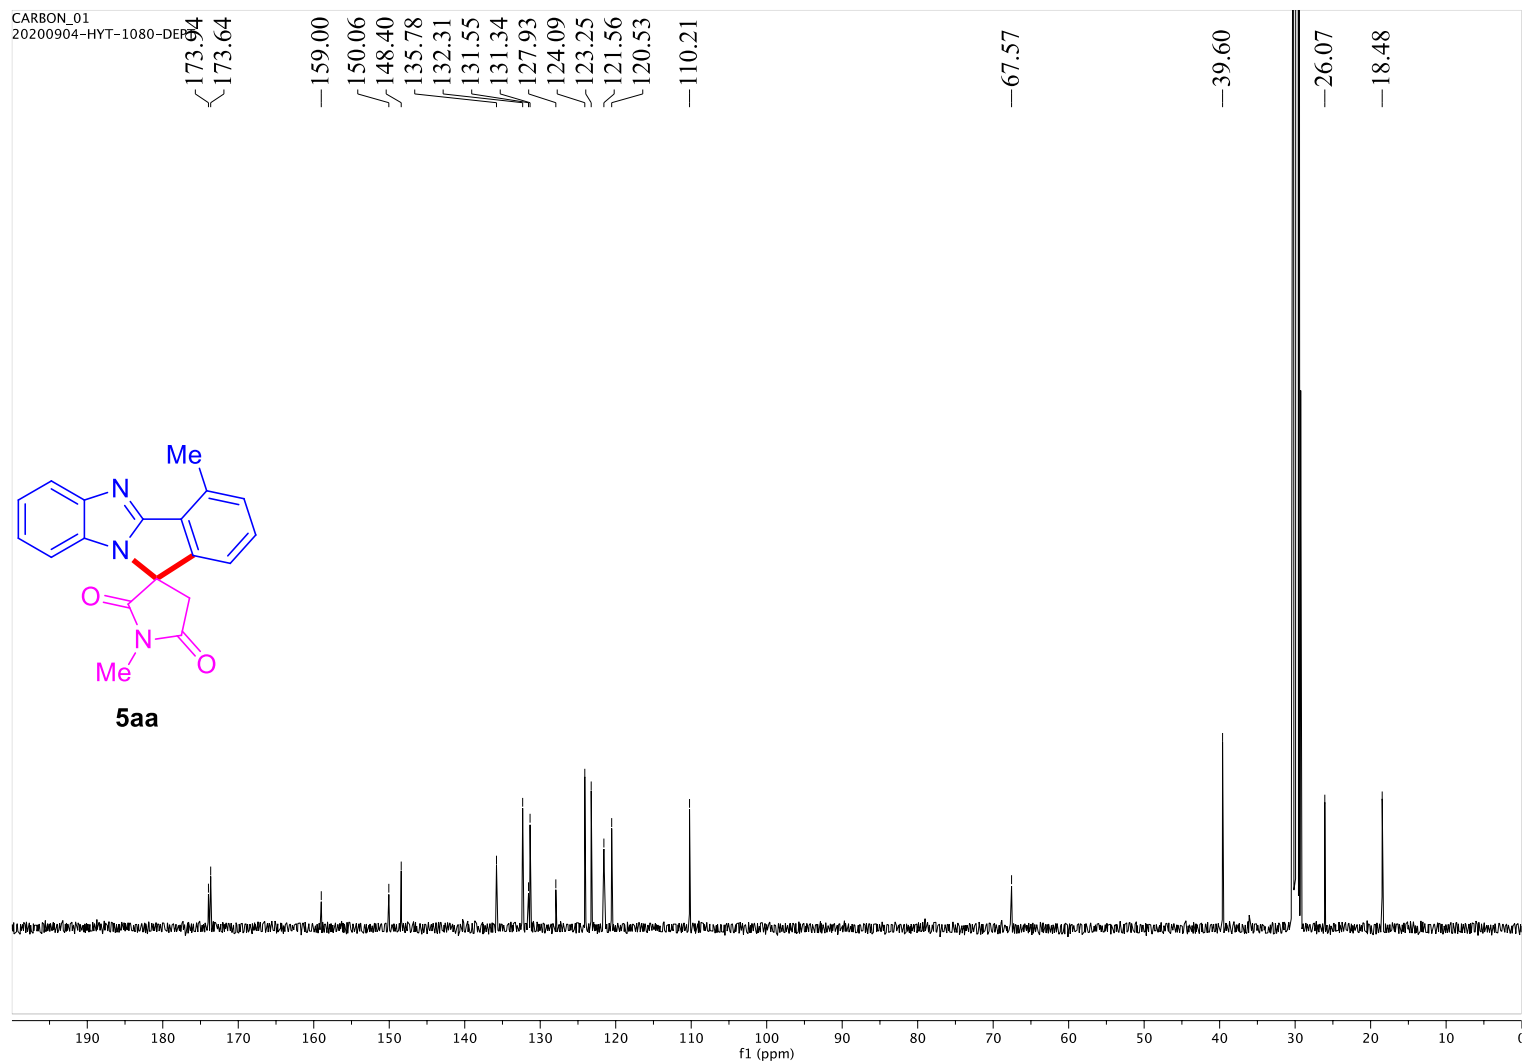

$^{13}\text{C}$  NMR spectrum (100 MHz) of compound **5aa** in acetone- $d_6$ .

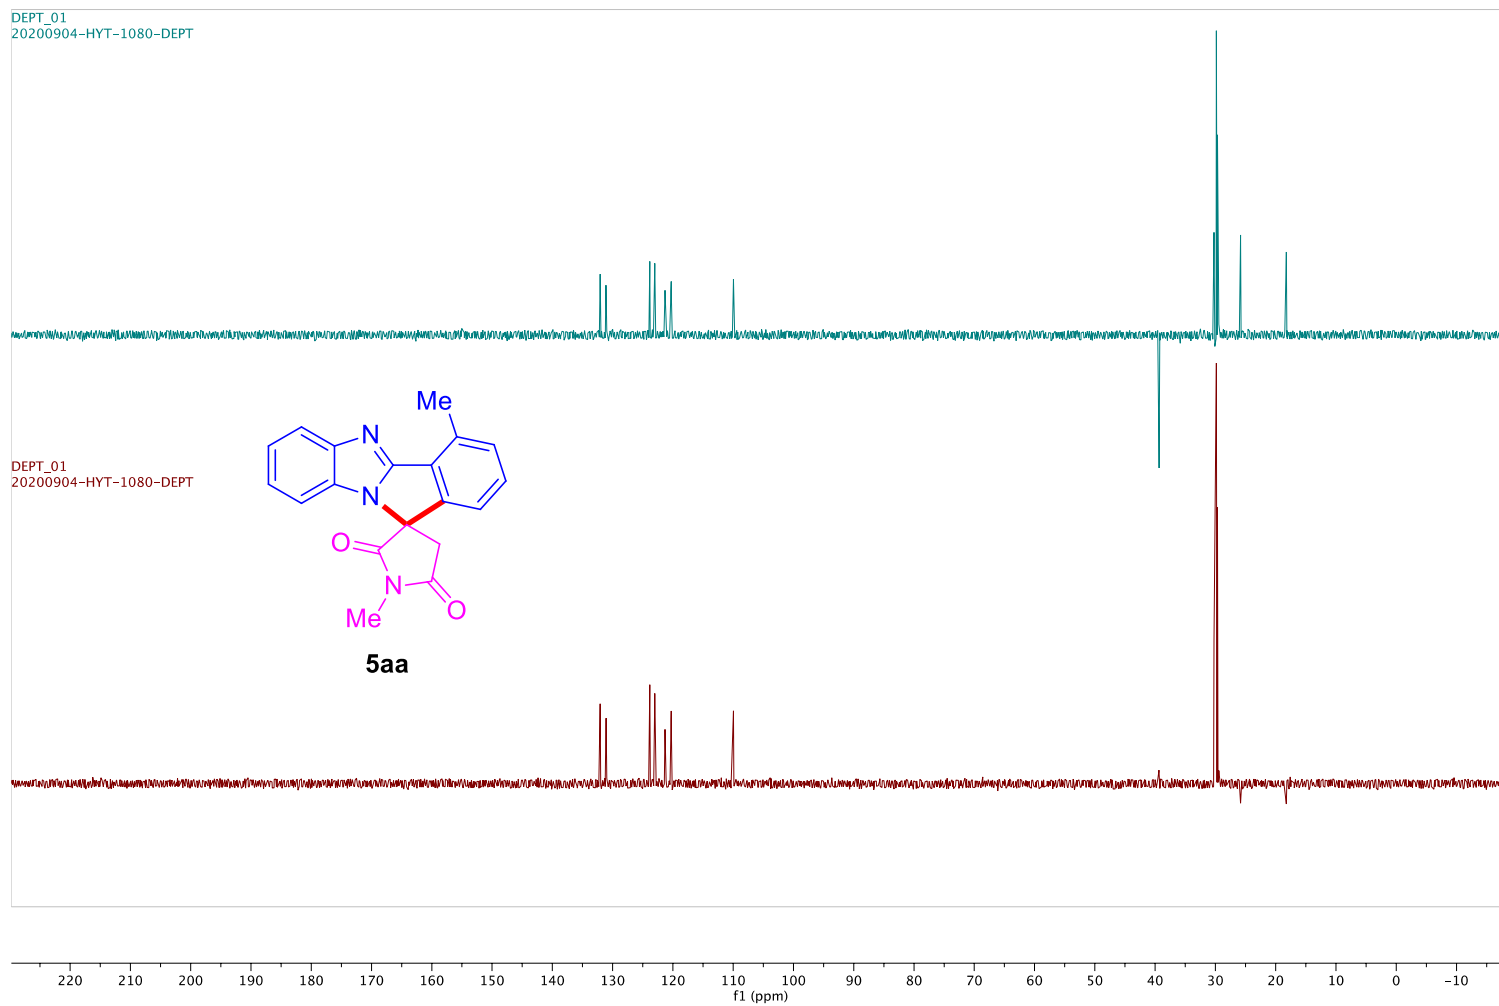

$^{13}\text{C}$ -DEPT spectrum (100 MHz) of compound **5aa** in acetone- $d_6$ .

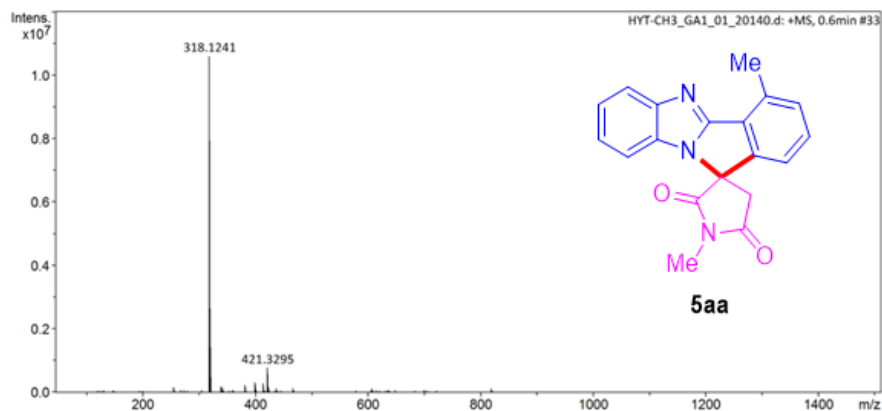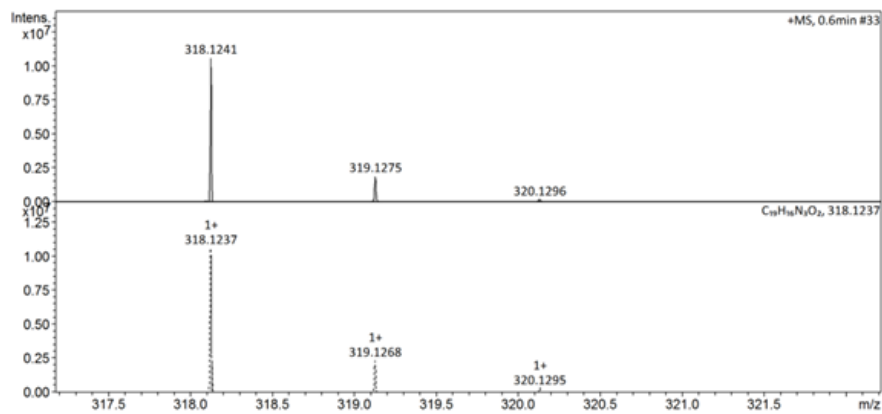

### Display Report

| Meas. m/z | # | Ion Formula                                                   | m/z      | err [ppm] | mSigma | # Sigma | Score  | rdb  | e <sup>-</sup> Conf | N-Rule | Adduct |
|-----------|---|---------------------------------------------------------------|----------|-----------|--------|---------|--------|------|---------------------|--------|--------|
| 318.1241  | 1 | C <sub>19</sub> H <sub>16</sub> N <sub>3</sub> O <sub>2</sub> | 318.1237 | 1.2       | 23.5   | 1       | 100.00 | 13.5 | even                | ok     | M      |

HRMS (ESI) of compound **5aa**

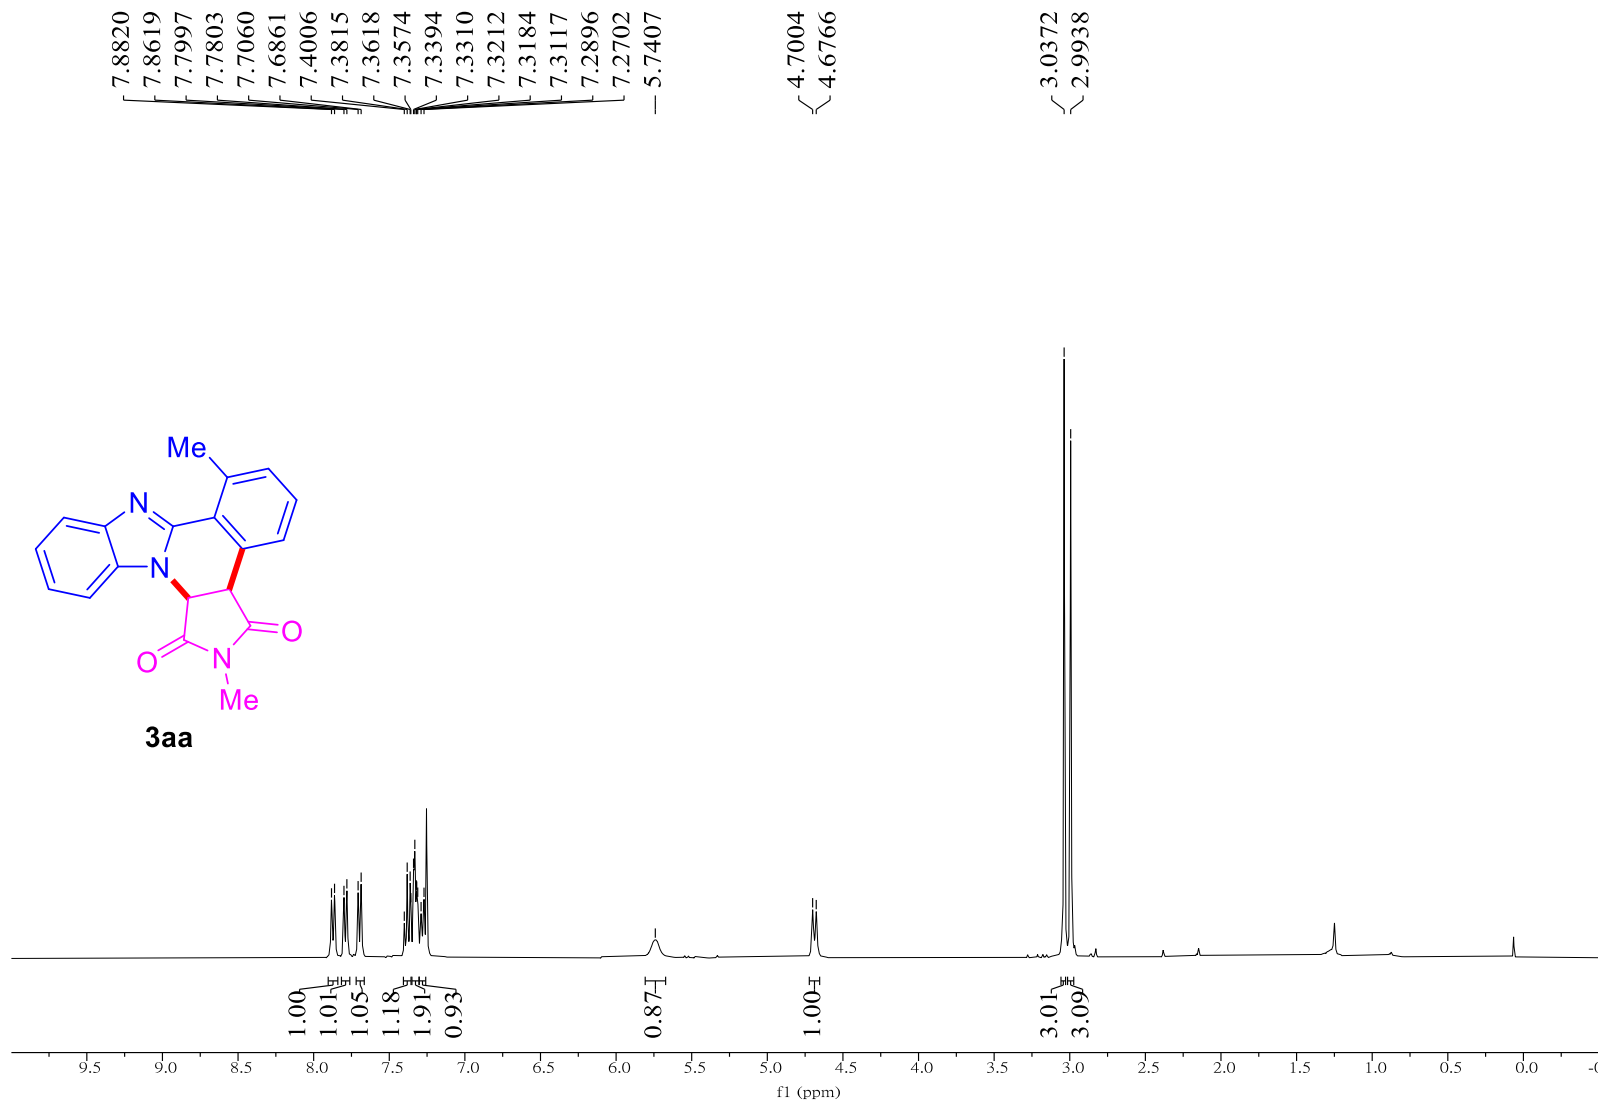

$^1\text{H}$  NMR spectrum (400 MHz) of compound **3aa** in  $\text{CDCl}_3$ .



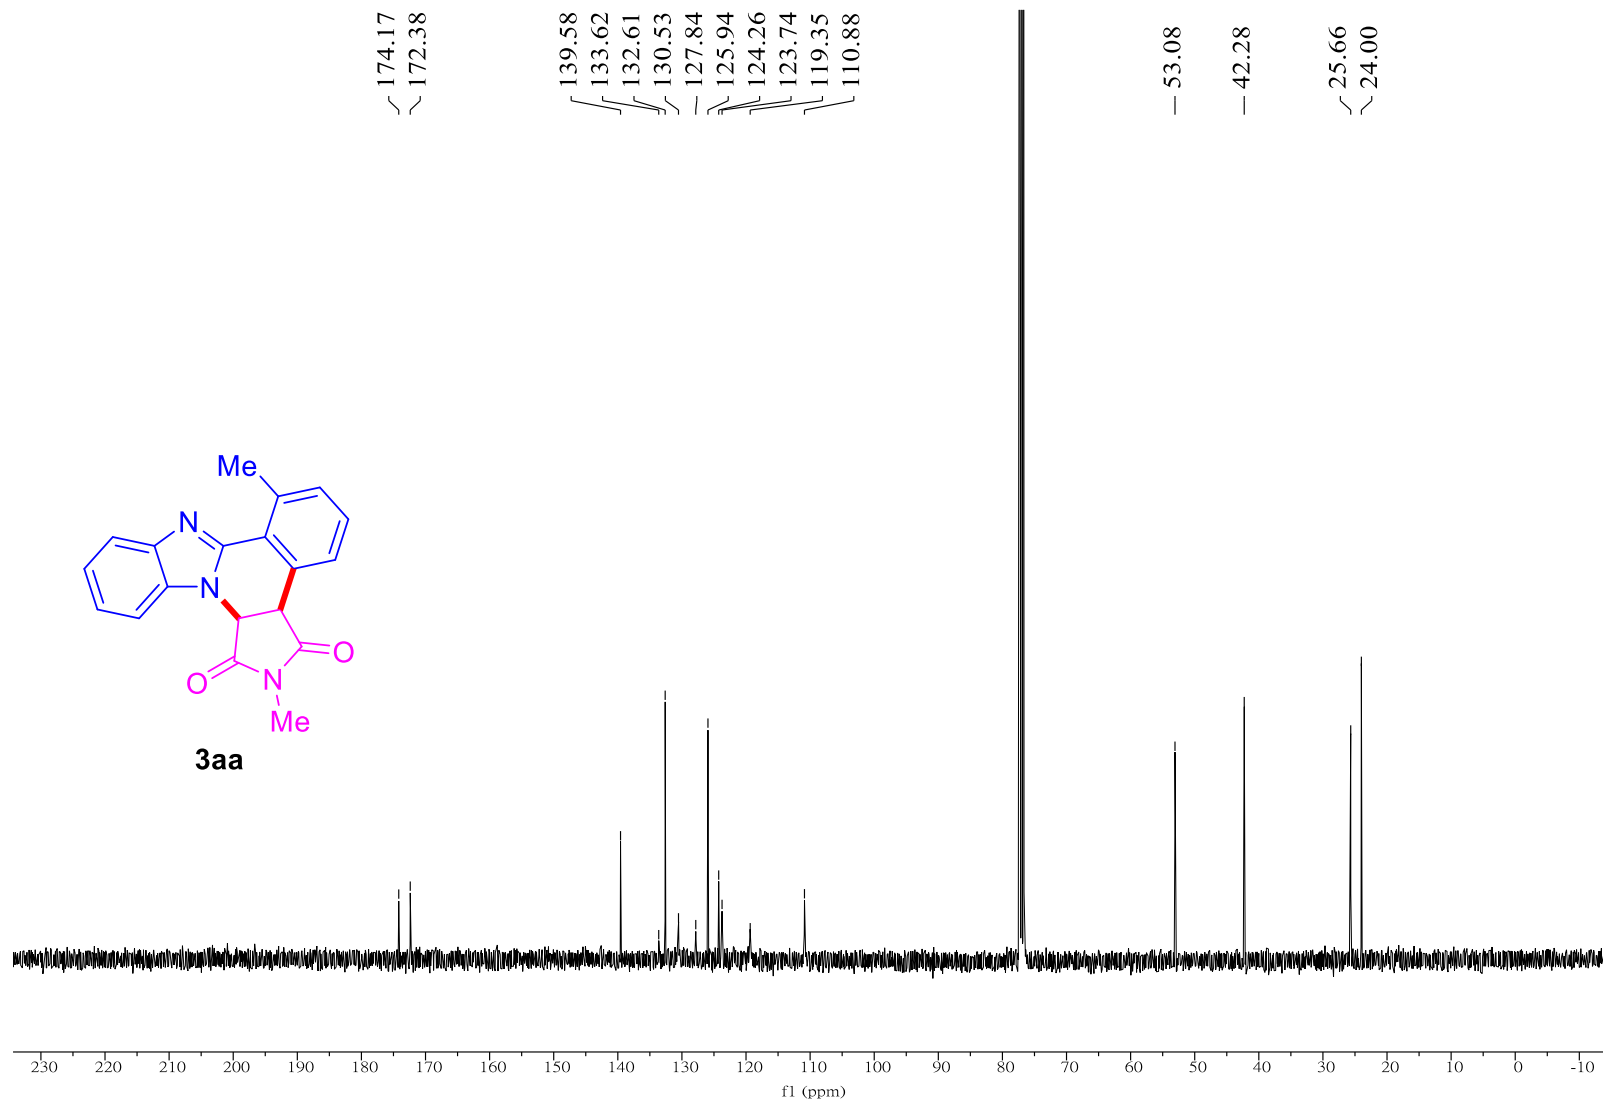

$^{13}\text{C}$  NMR spectrum (100 MHz) of compound **3aa** in  $\text{CDCl}_3$ .

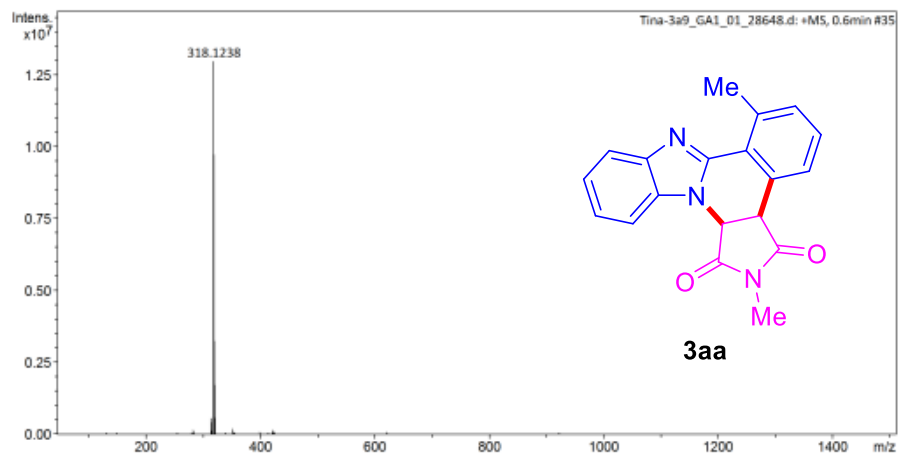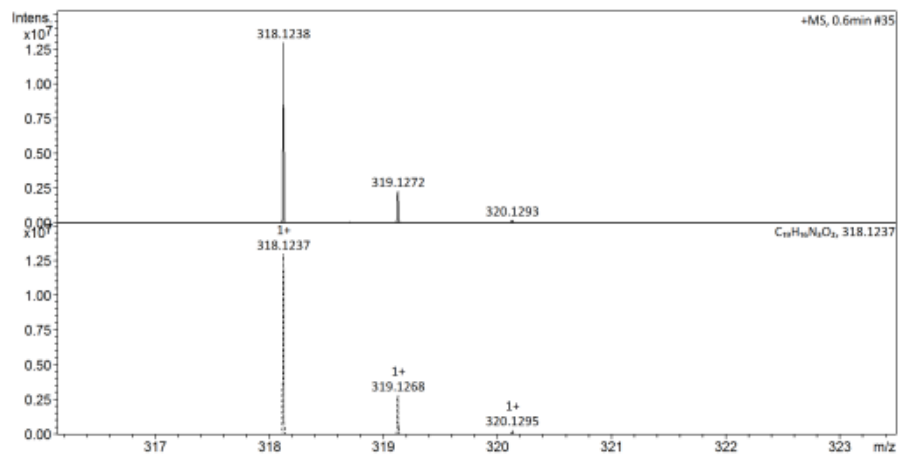

## Display Report

| Meas. m/z | # | Ion Formula                                                   | m/z      | err [ppm] | mSigma | # Sigma | Score  | rdb  | e <sup>-</sup> Conf | N-Rule | Adduct |
|-----------|---|---------------------------------------------------------------|----------|-----------|--------|---------|--------|------|---------------------|--------|--------|
| 318.1238  | 1 | C <sub>19</sub> H <sub>16</sub> N <sub>3</sub> O <sub>2</sub> | 318.1237 | -0.4      | 24.9   | 1       | 100.00 | 13.5 | even                | ok     | M+H    |

HRMS (ESI) of compound **3aa**.

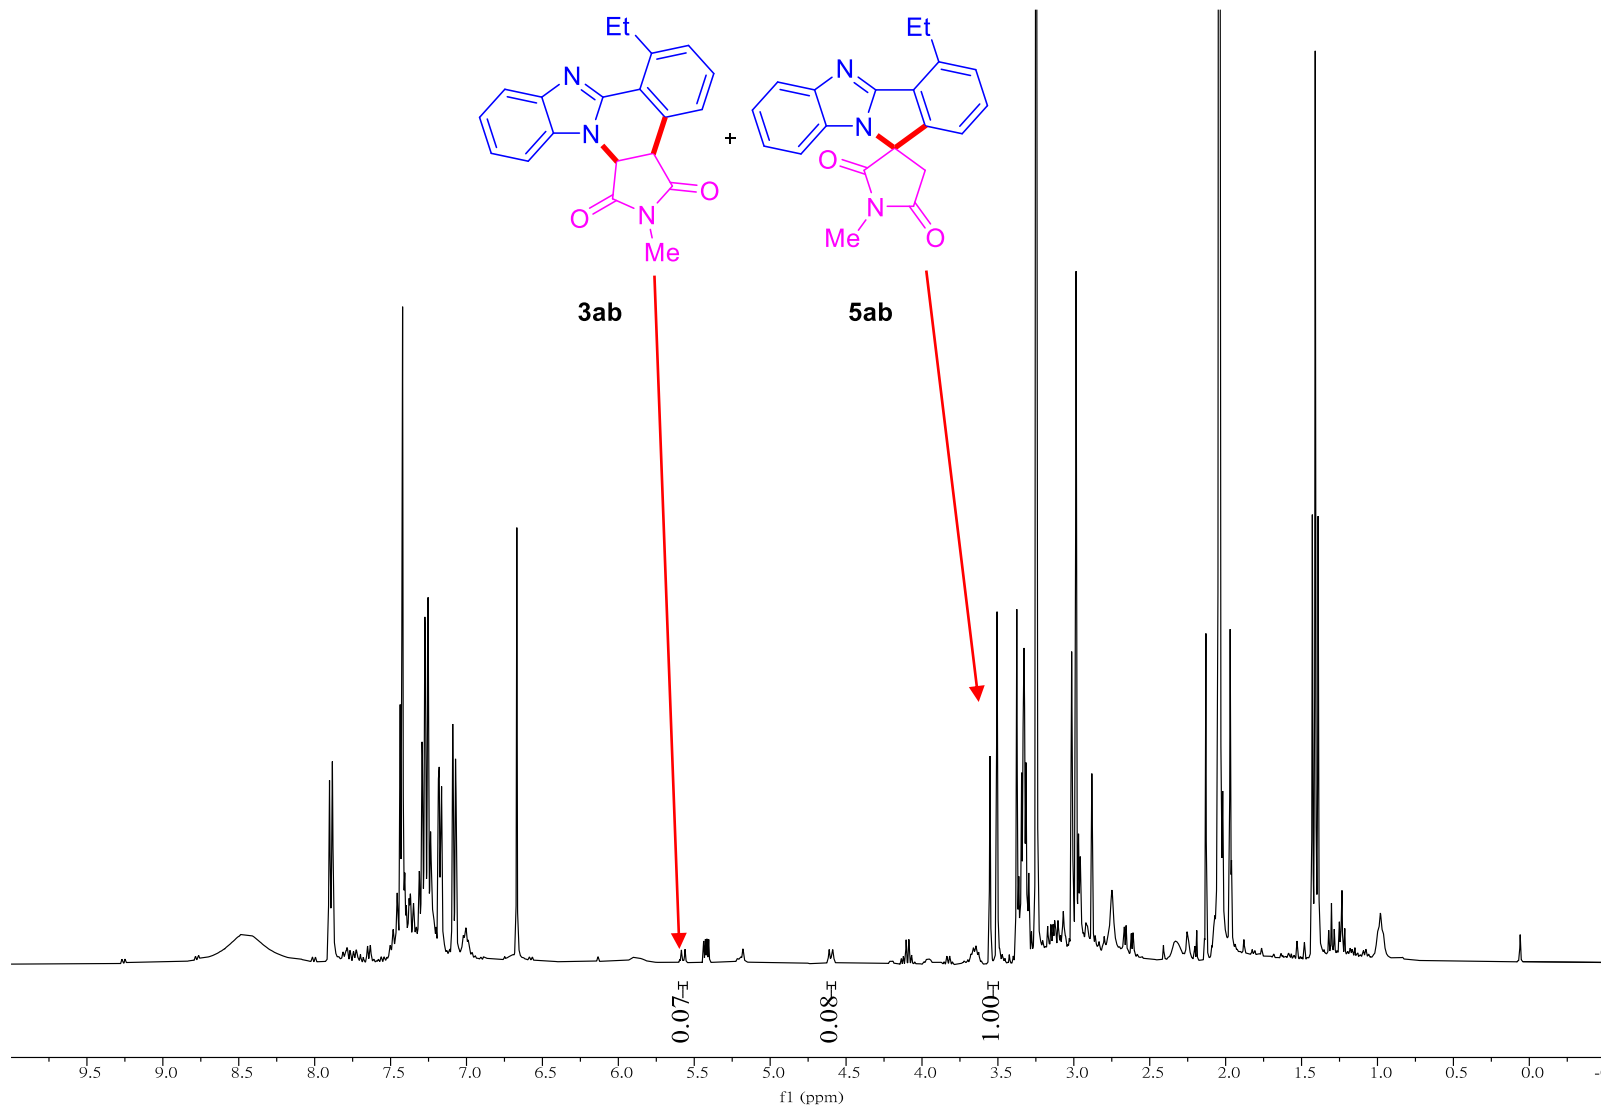

$^1\text{H}$  NMR spectrum (400 MHz) of compound **3ab** and **5ab** in  $\text{CDCl}_3$ .

PROTON\_01  
20201014-HYT-2091-P2

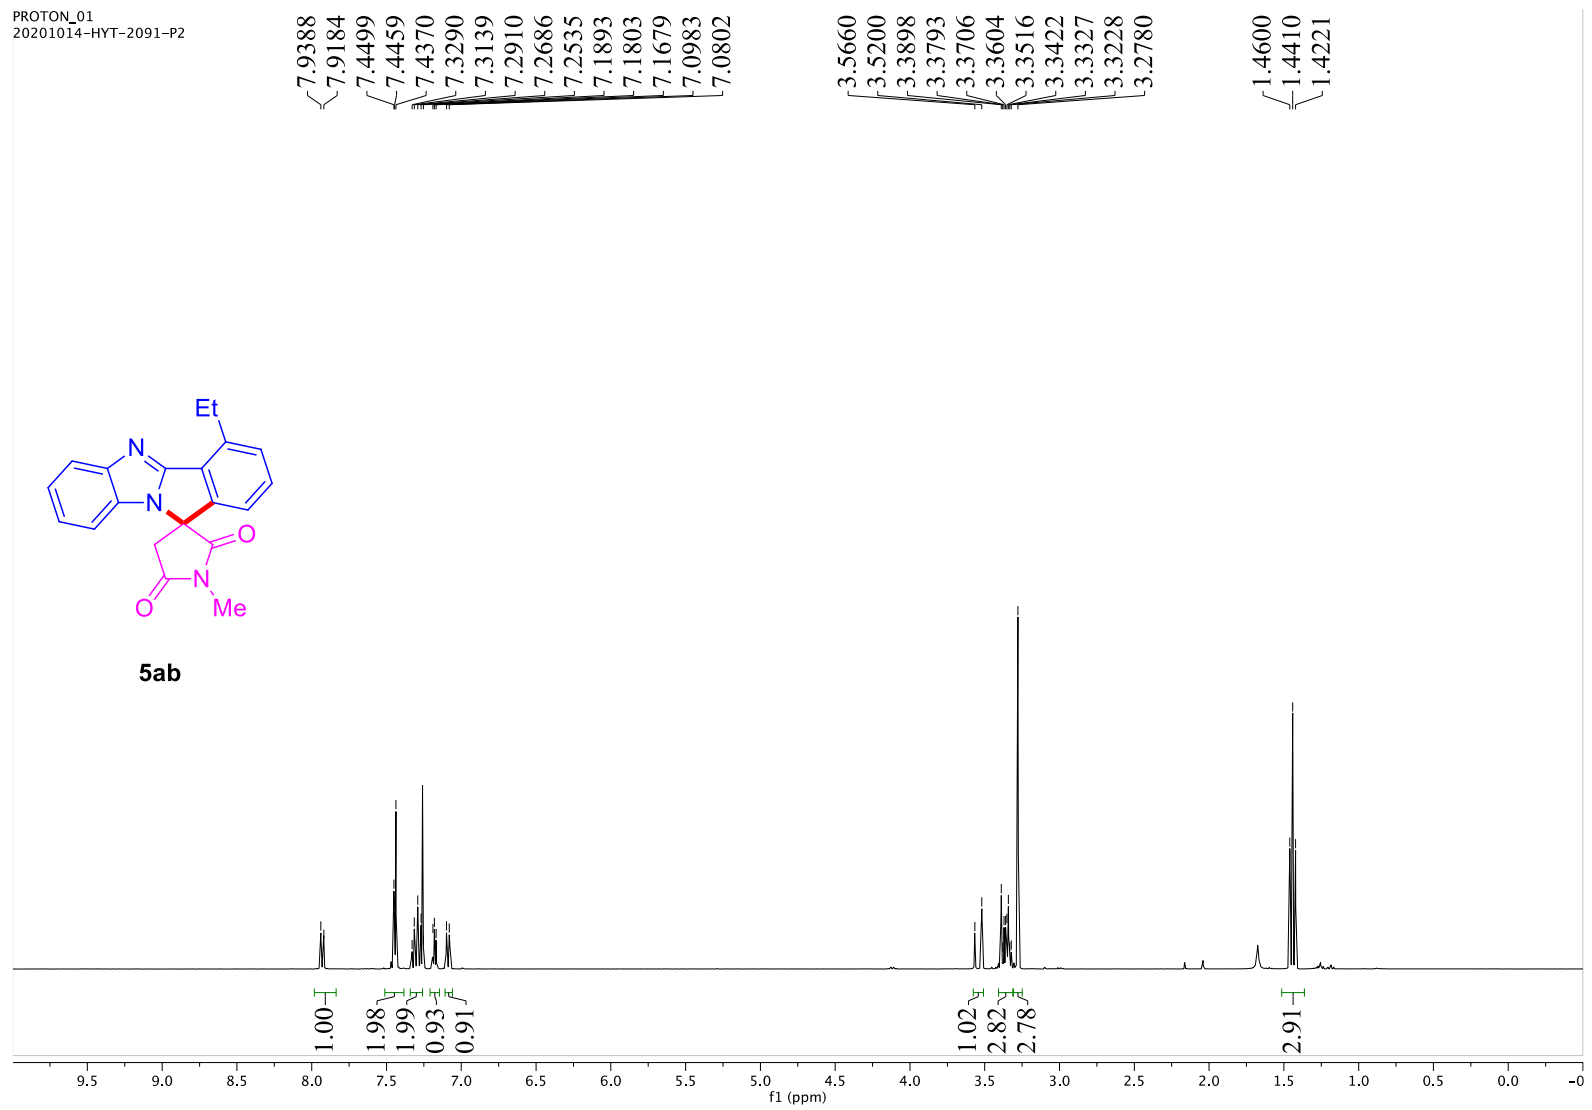

<sup>1</sup>H NMR spectrum (400 MHz) of compound **5ab** in CDCl<sub>3</sub>.

CARBON\_01  
20201023-HYT-2091-P2-data

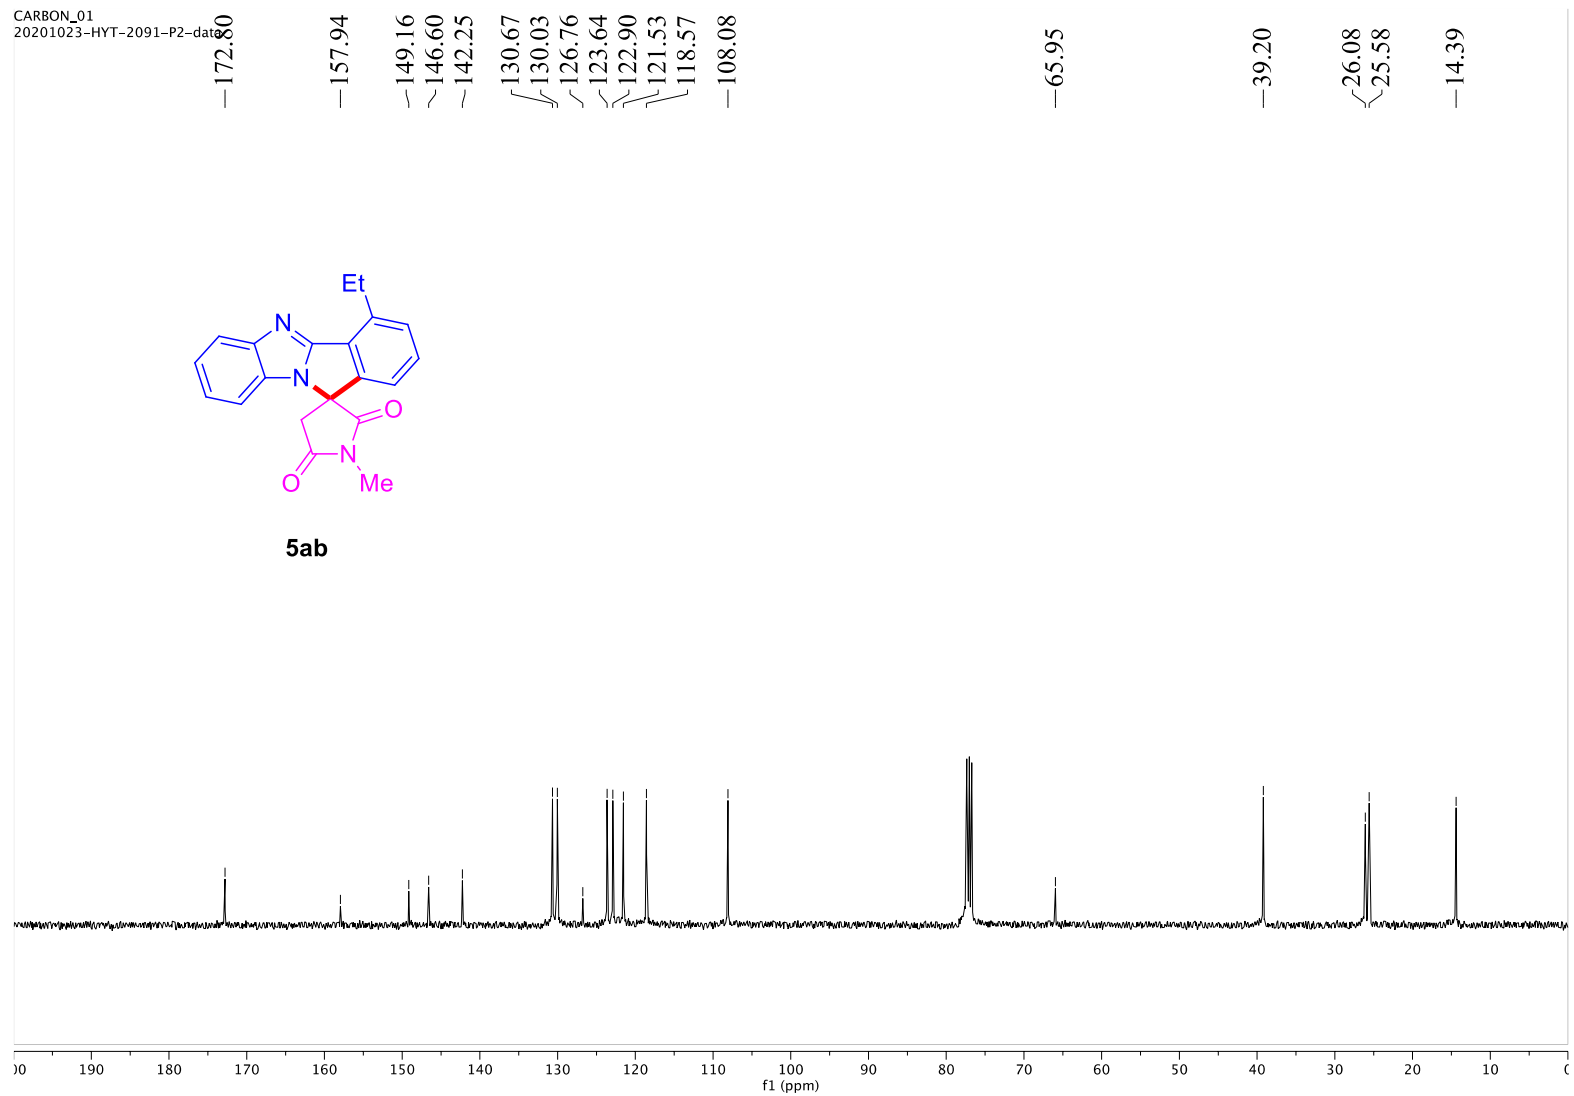

$^{13}\text{C}$  NMR spectrum (100 MHz) of compound **5ab** in  $\text{CDCl}_3$ .

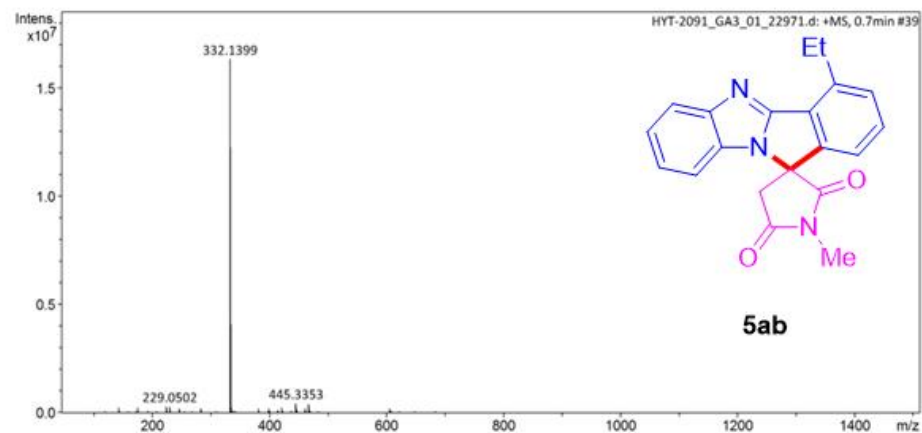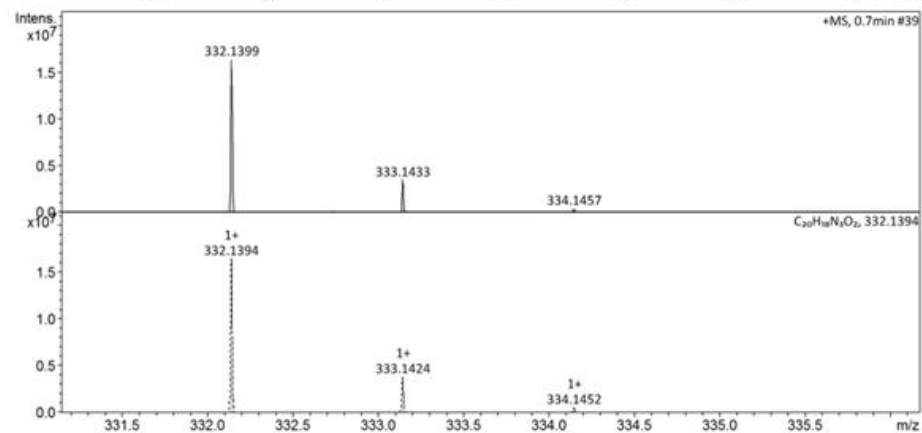

### Display Report

| Meas. m/z | # | Ion Formula                                                   | m/z      | err [ppm] | mSigma | # Sigma | Score  | rdb  | e <sup>-</sup> Conf | N-Rule | Adduct |
|-----------|---|---------------------------------------------------------------|----------|-----------|--------|---------|--------|------|---------------------|--------|--------|
| 332.1399  | 1 | C <sub>20</sub> H <sub>18</sub> N <sub>2</sub> O <sub>2</sub> | 332.1394 | 1.7       | 13.8   | 1       | 100.00 | 13.5 | even                | ok     | M+H    |

HRMS (ESI) of compound **5ab**

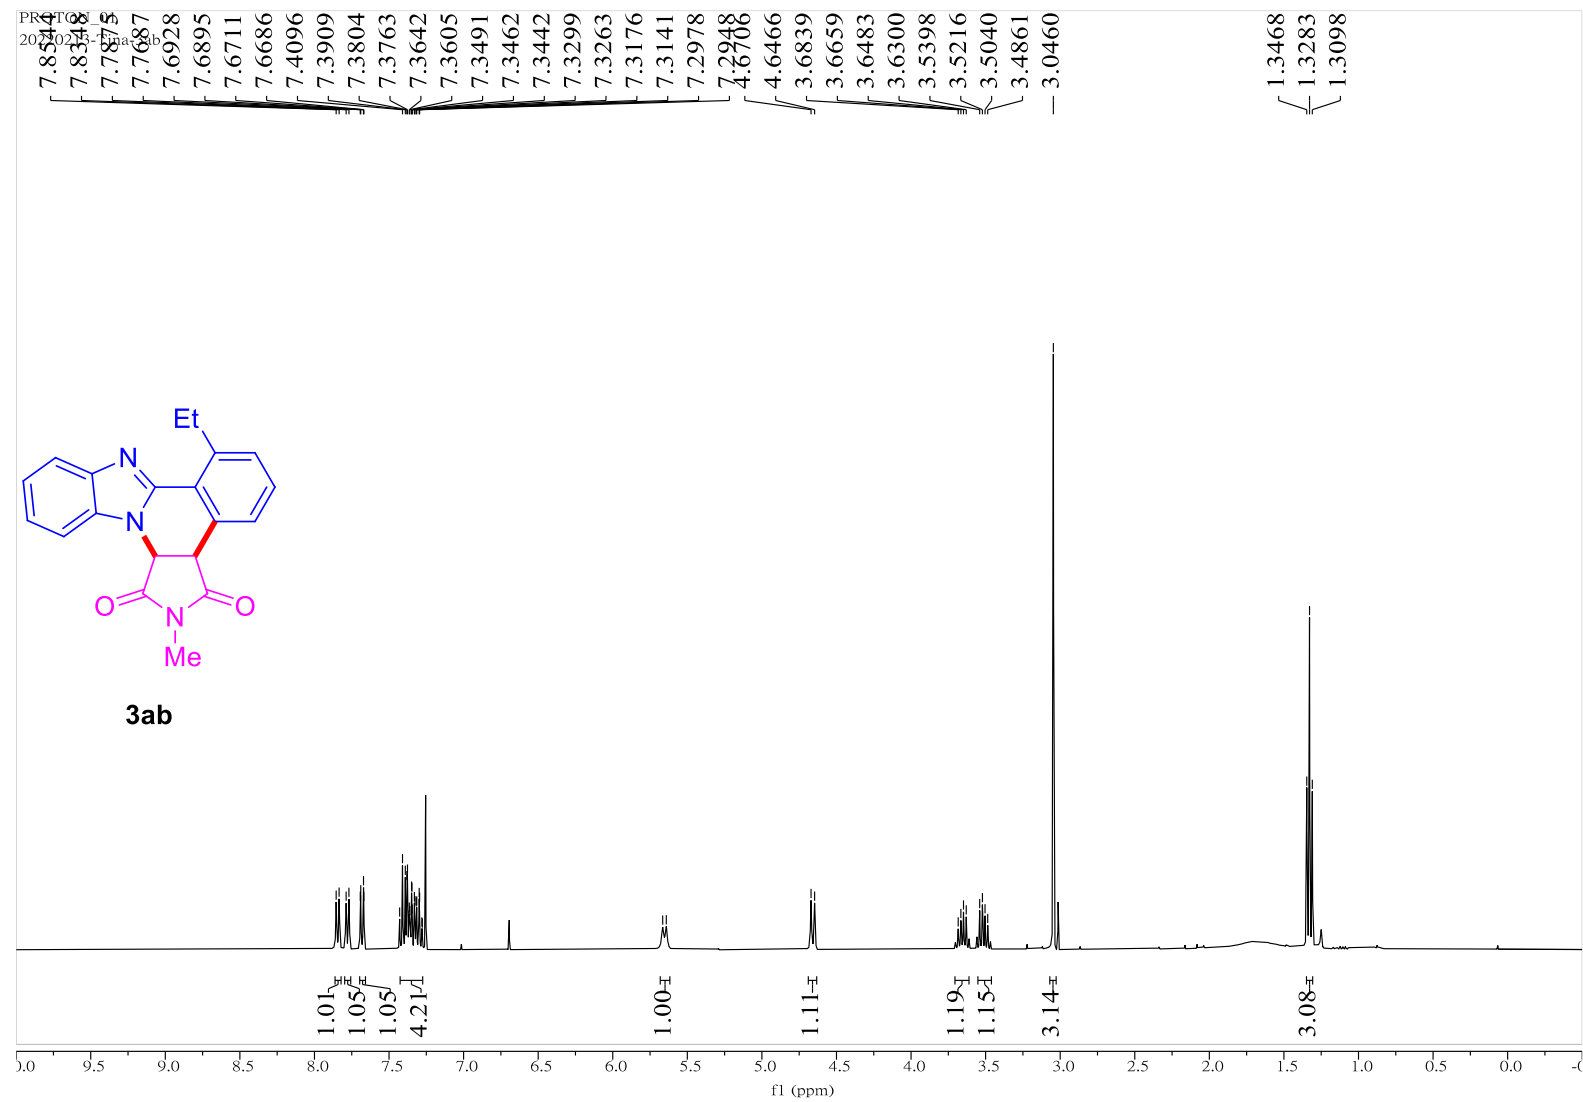

$^1\text{H}$  NMR spectrum (400 MHz) of compound **3ab** in  $\text{CDCl}_3$ .

CARBON\_01  
20220213-Tina-3ab

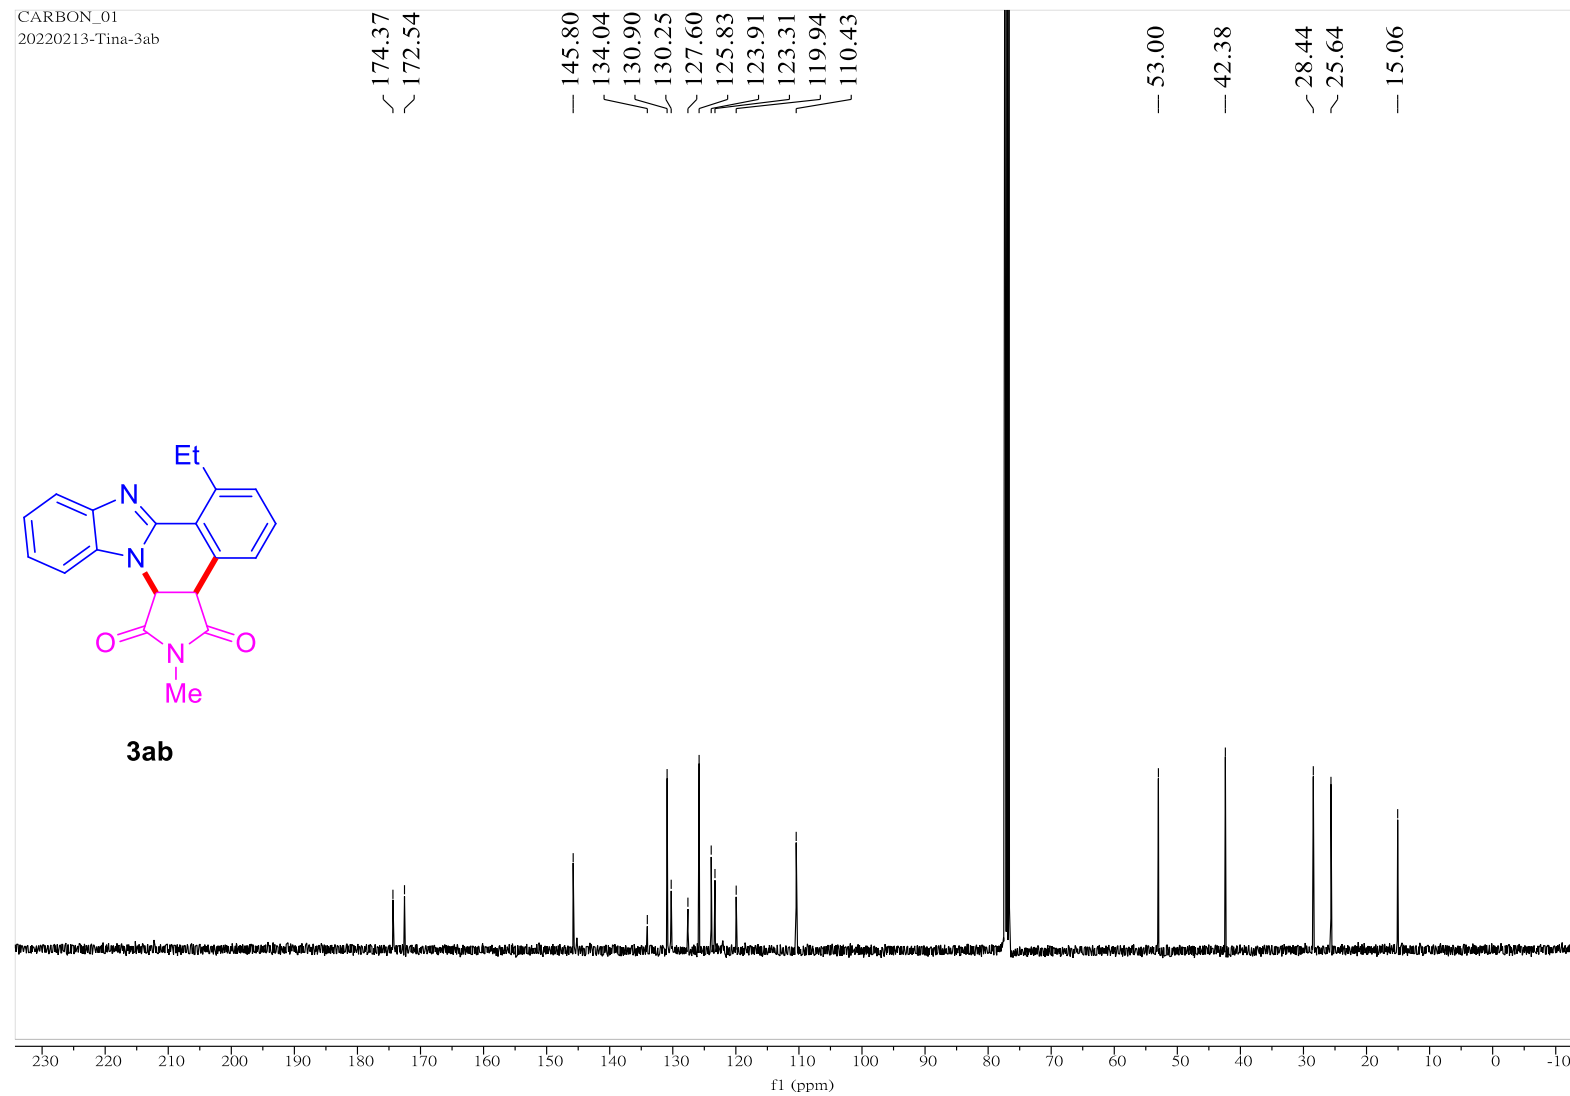

<sup>13</sup>C NMR spectrum (100 MHz) of compound **3ab** in CDCl<sub>3</sub>.



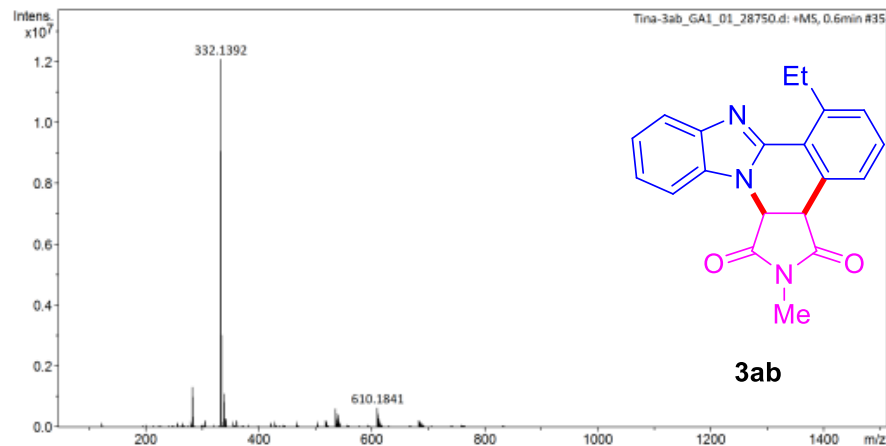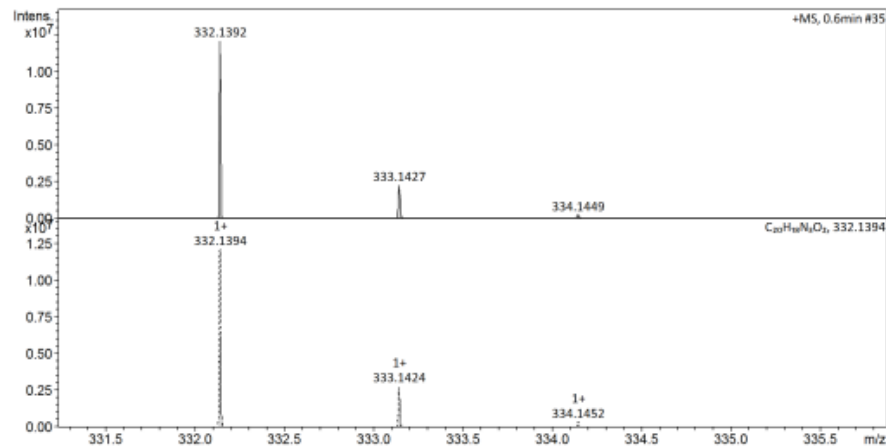

## Display Report

| Meas. m/z | # | Ion Formula                                                   | m/z      | err [ppm] | mSigma | # Sigma | Score  | rdb  | e <sup>-</sup> Conf | N-Rule | Adduct |
|-----------|---|---------------------------------------------------------------|----------|-----------|--------|---------|--------|------|---------------------|--------|--------|
| 332.1392  | 1 | C <sub>20</sub> H <sub>18</sub> N <sub>3</sub> O <sub>2</sub> | 332.1394 | -0.4      | 25.4   | 1       | 100.00 | 13.5 | even                | ok     | M+H    |

HRMS (ESI) of compound **3ab**.

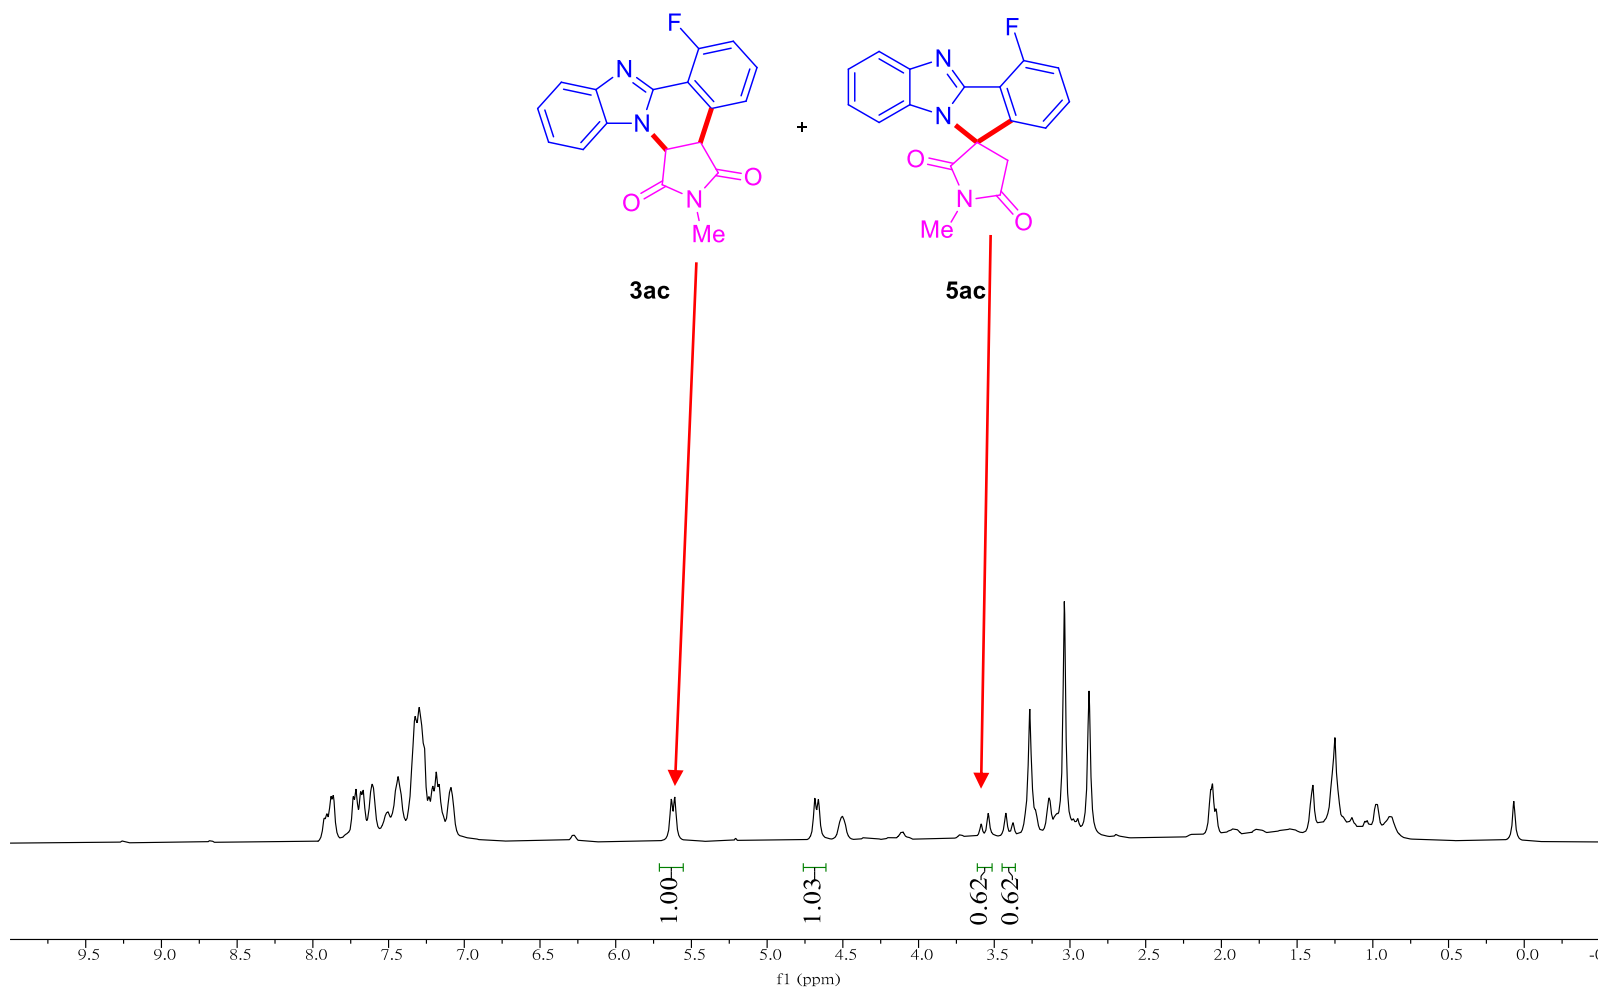

$^1\text{H}$  NMR spectrum (400 MHz) of compound **3ac** and **5ac** in  $\text{CDCl}_3$ .

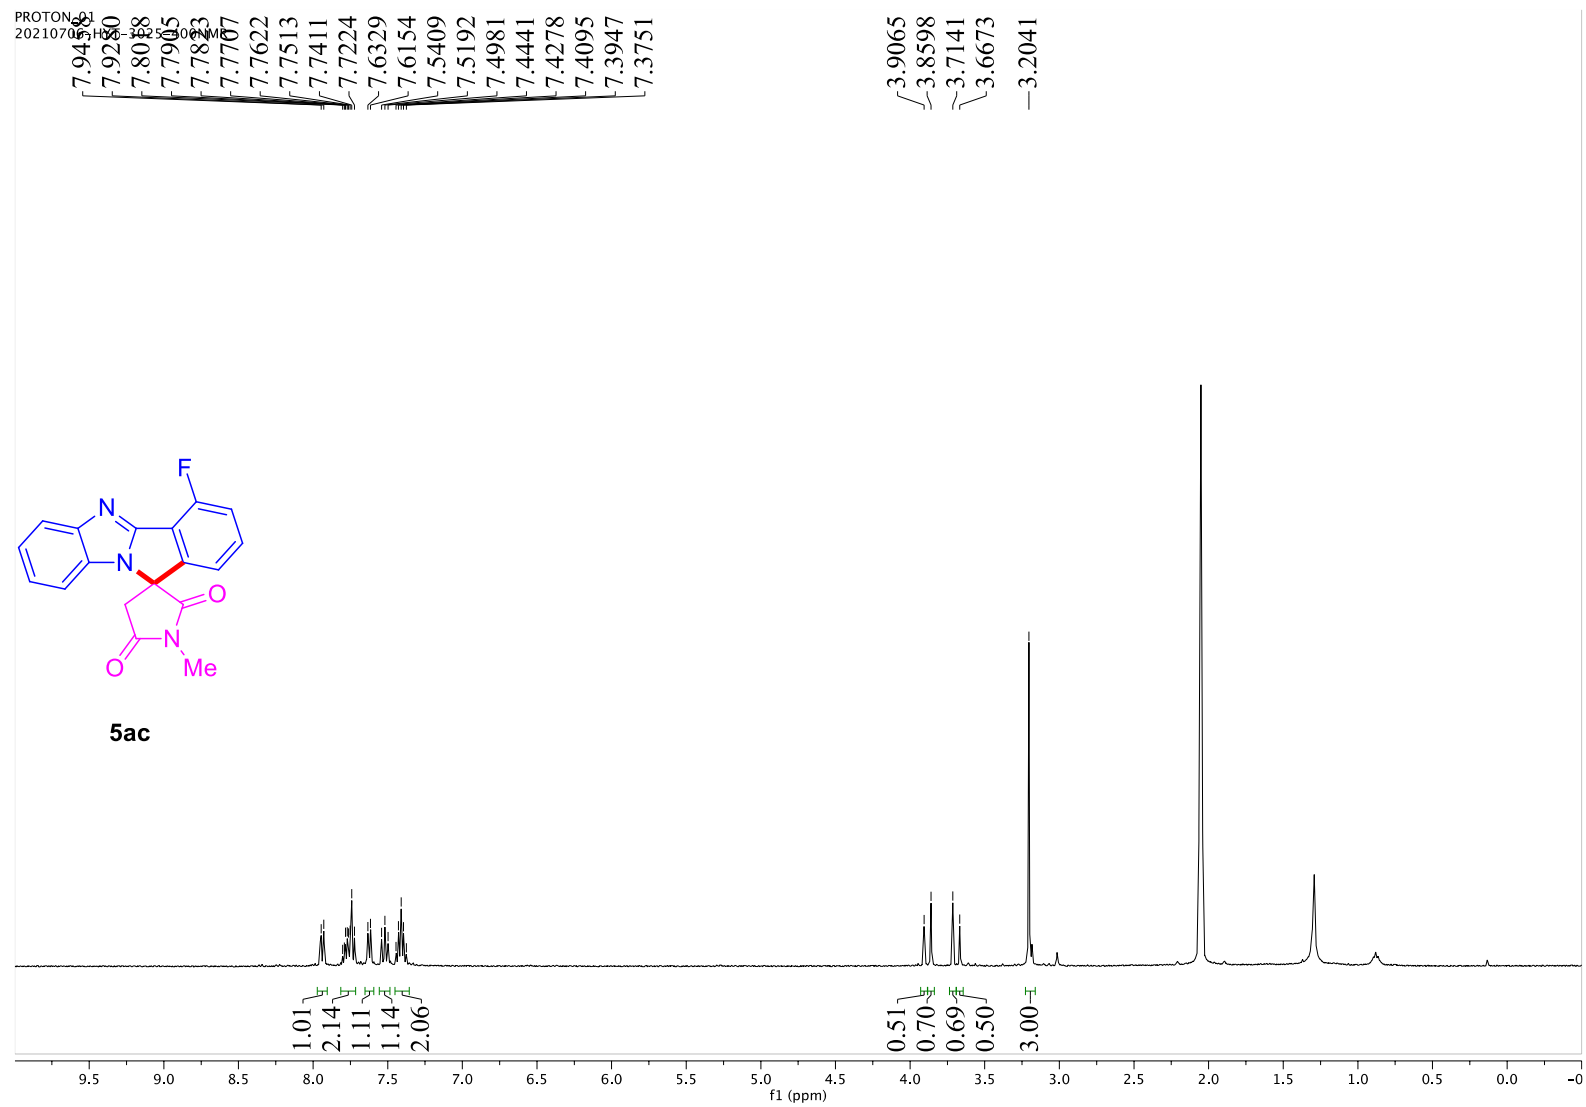

$^1\text{H}$  NMR spectrum (400 MHz) of compound **5ac** in acetone- $d_6$ .

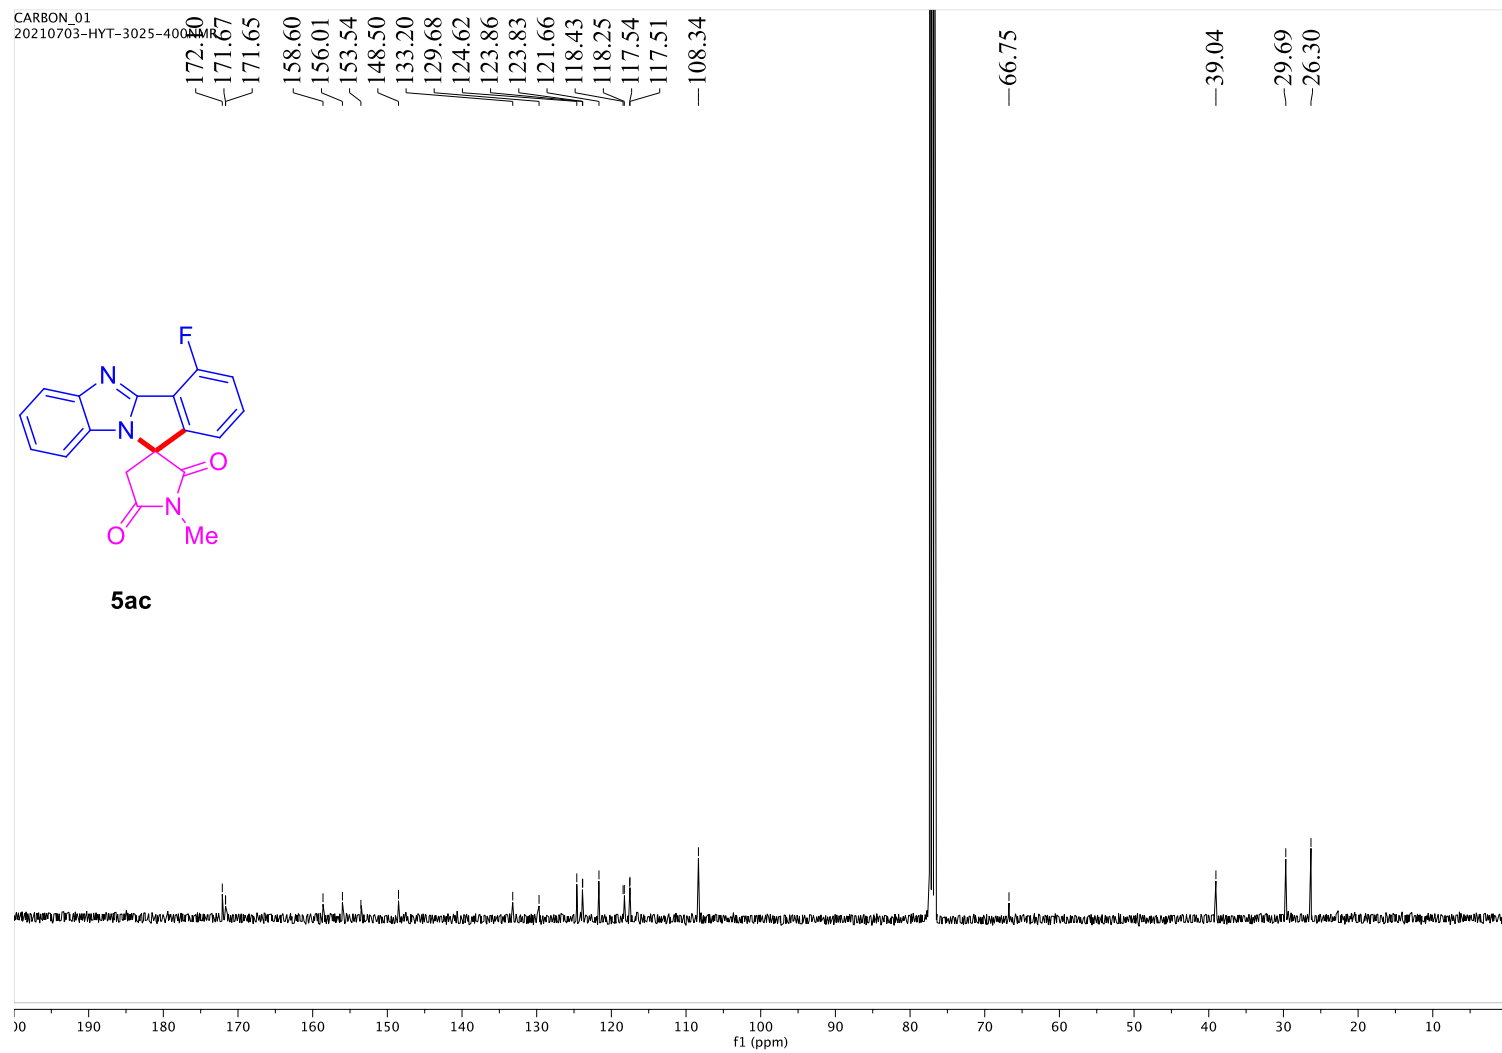

<sup>13</sup>C NMR spectrum (100 MHz) of compound **5ac** in CDCl<sub>3</sub>.

FLUORINE\_01  
20210703-HYT-3025-400NMR

--111.30

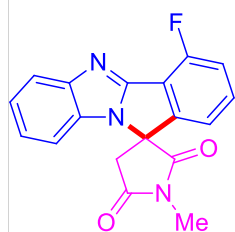

**5ac**

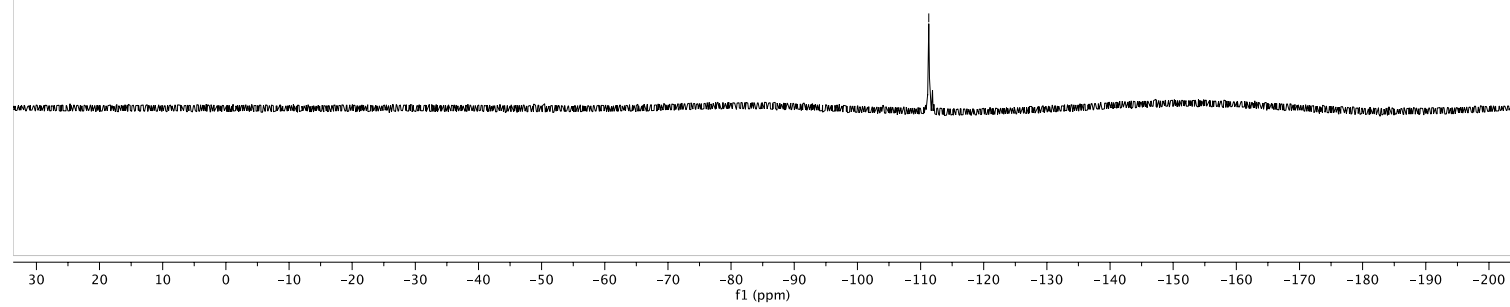

$^{19}\text{F}$  NMR spectrum (376 MHz) of compound **5ac** in  $\text{CDCl}_3$ .

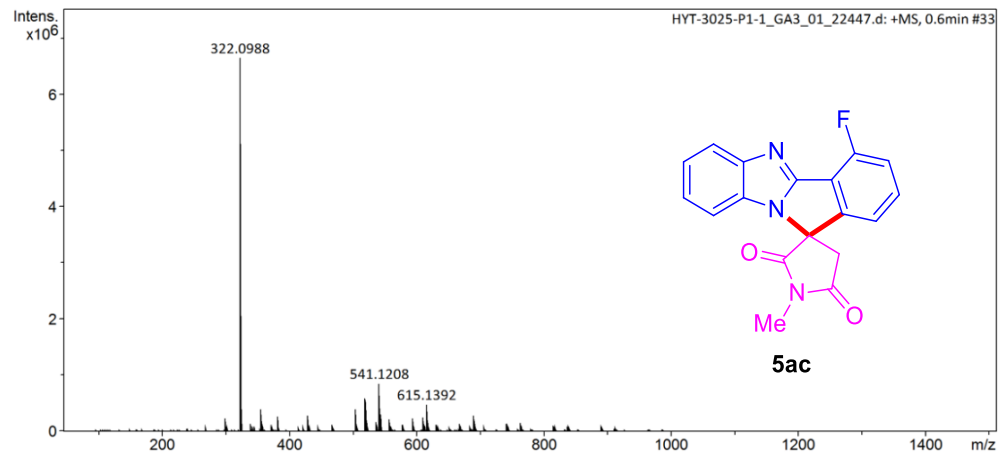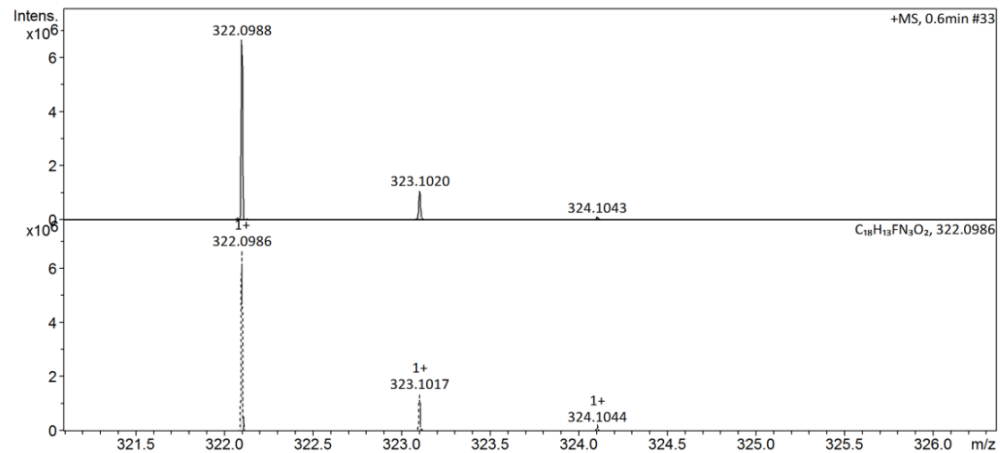

## Display Report

| Meas. m/z | # | Ion Formula                                                    | m/z      | err [ppm] | mSigma | # Sigma | Score  | rdb  | e <sup>-</sup> Conf | N-Rule | Adduct |
|-----------|---|----------------------------------------------------------------|----------|-----------|--------|---------|--------|------|---------------------|--------|--------|
| 322.0988  | 1 | C <sub>18</sub> H <sub>13</sub> FN <sub>3</sub> O <sub>2</sub> | 322.0986 | 0.5       | 25.4   | 1       | 100.00 | 13.5 | even                | ok     | M+H    |

HRMS (ESI) of compound **5ac**.

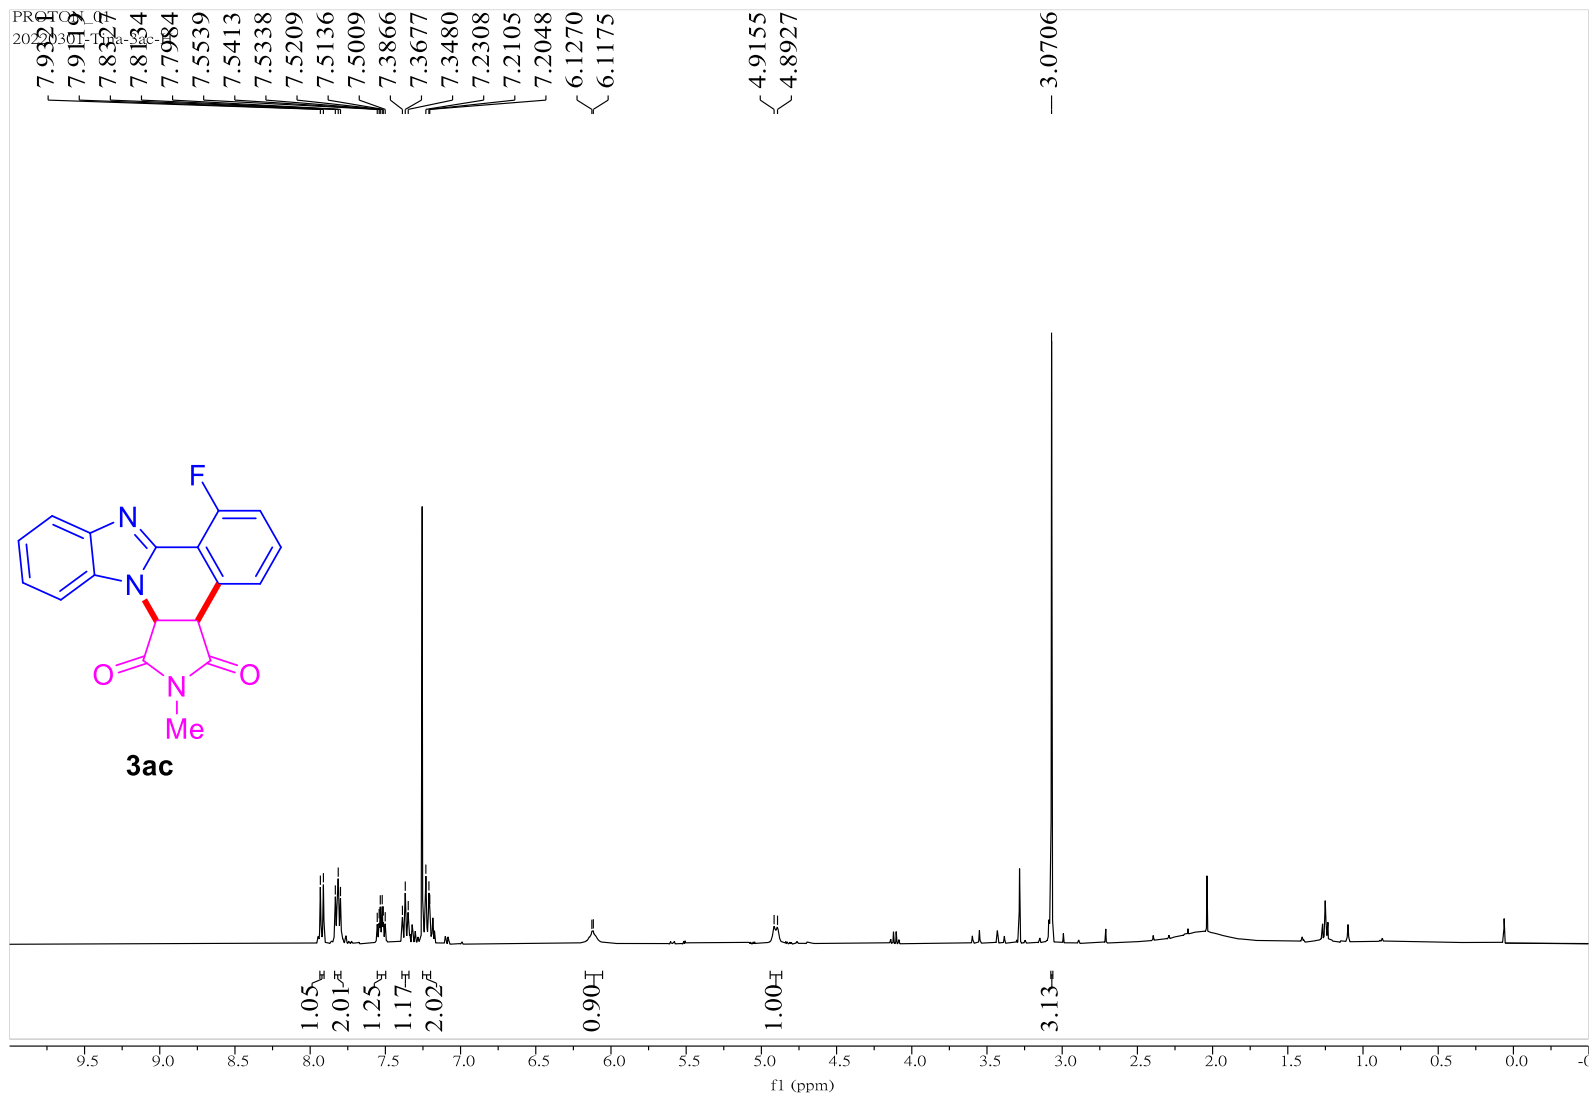

<sup>1</sup>H NMR spectrum (400 MHz) of compound **3ac** in CDCl<sub>3</sub>.

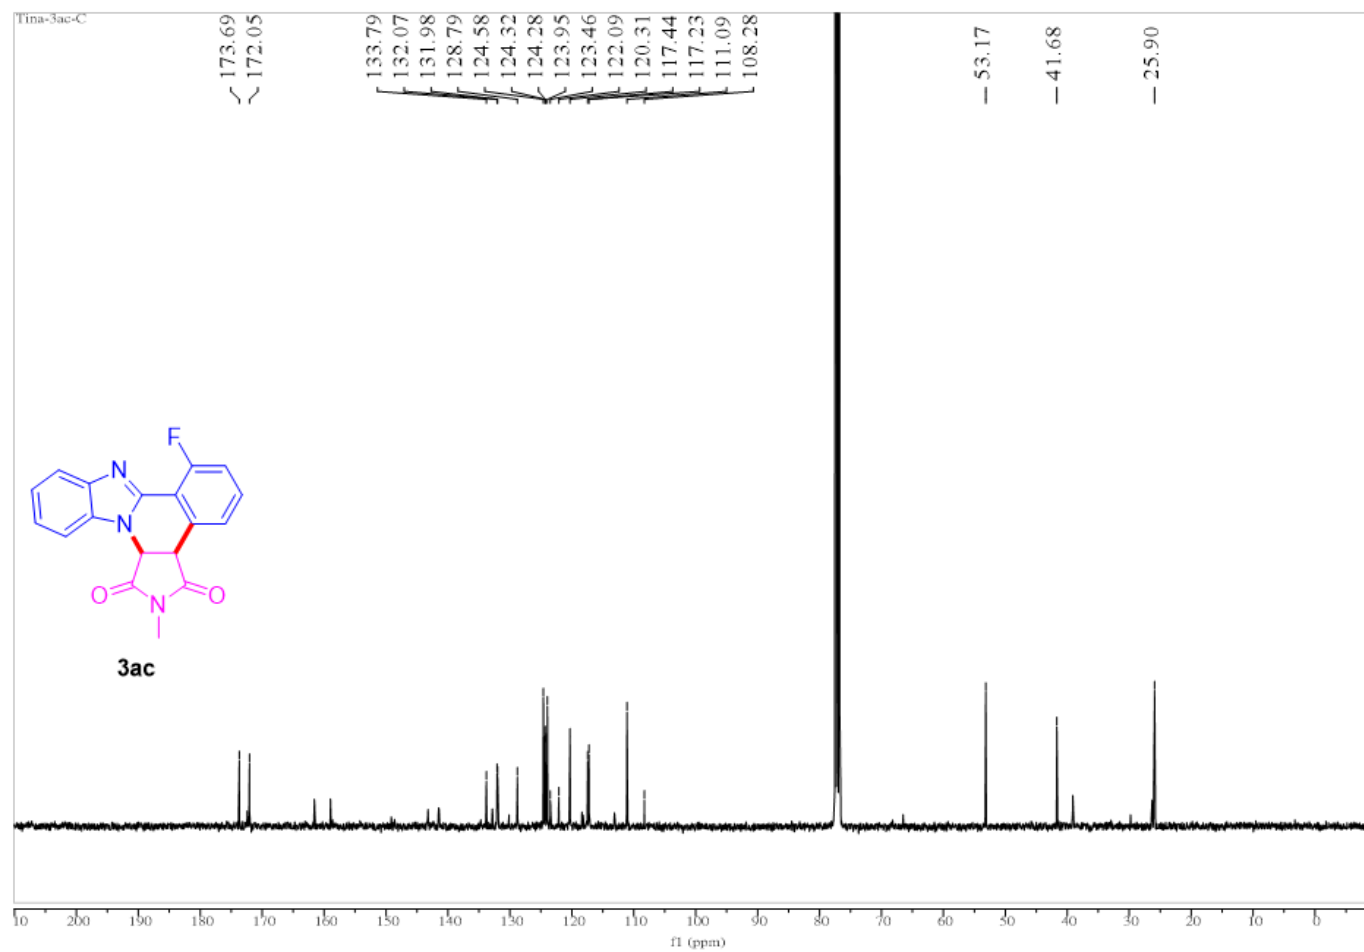

$^{13}\text{C}$  NMR spectrum (100 MHz) of compound **3ac** in  $\text{CDCl}_3$ .



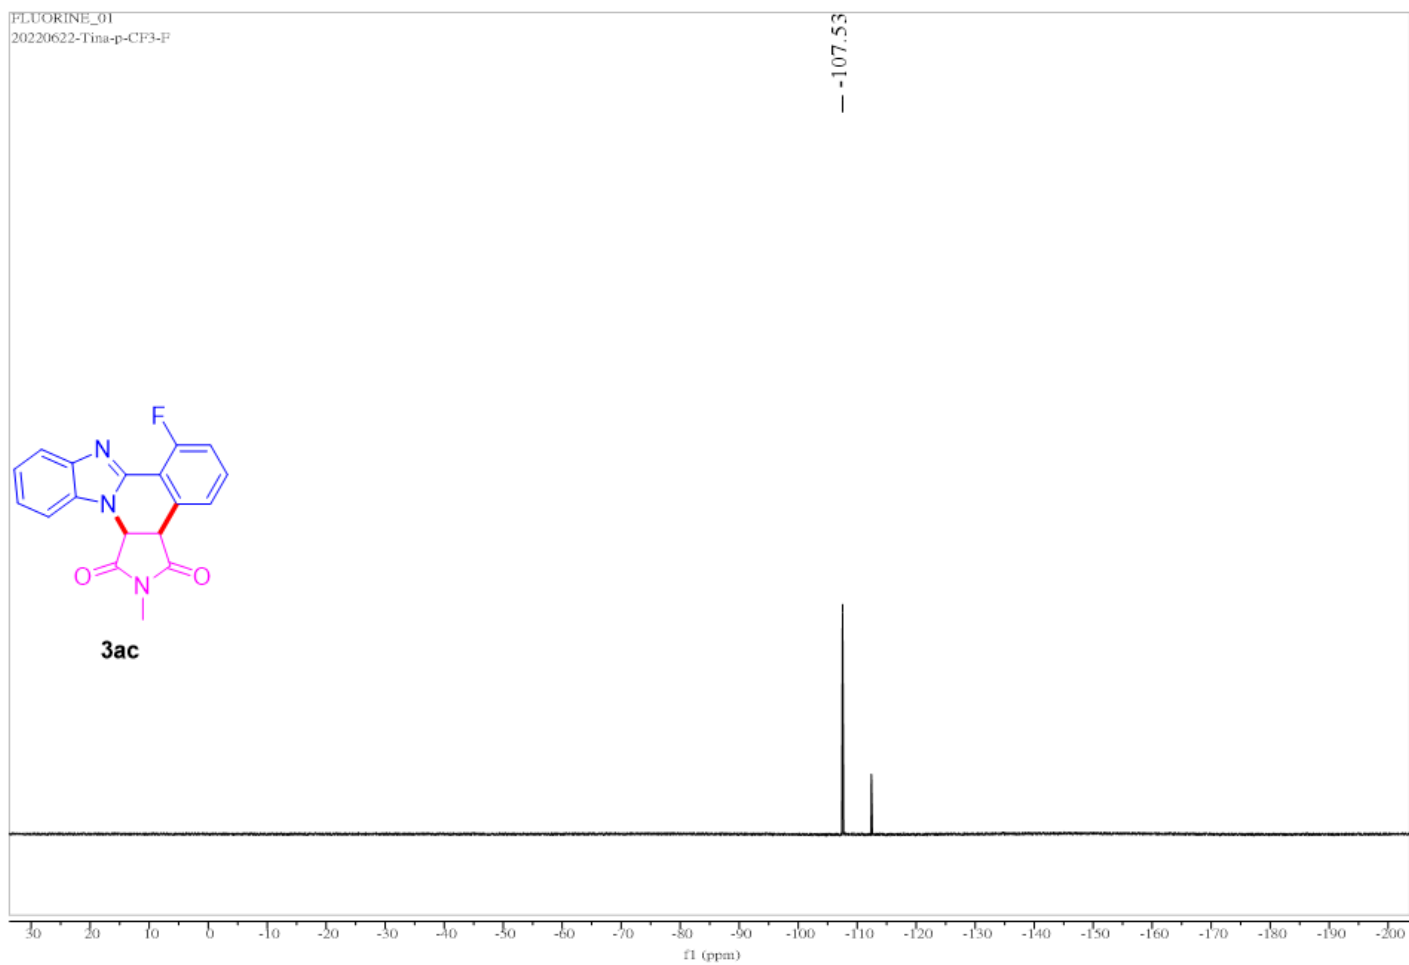

$^{19}\text{F}$  NMR spectrum (376 MHz) of compound **3ac** in  $\text{CDCl}_3$

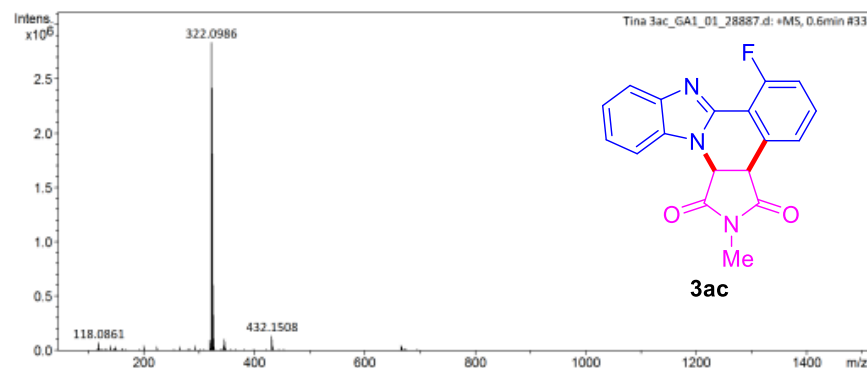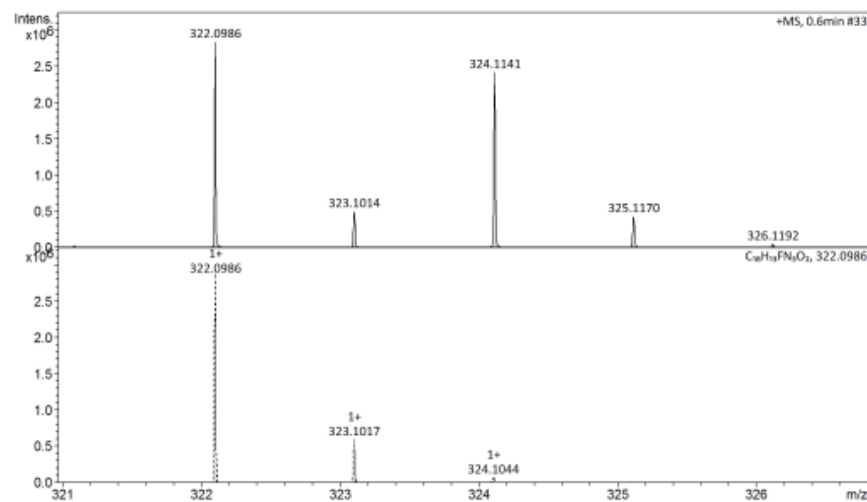

## Display Report

| Meas. m/z | # | Ion Formula                                                    | m/z      | err [ppm] | mSigma | # Sigma | Score  | rdb  | e <sup>-</sup> Conf | N-Rule | Adduct |
|-----------|---|----------------------------------------------------------------|----------|-----------|--------|---------|--------|------|---------------------|--------|--------|
| 322.0986  | 1 | C <sub>18</sub> H <sub>13</sub> FN <sub>3</sub> O <sub>2</sub> | 322.0986 | -0.1      | 23.3   | 1       | 100.00 | 13.5 | even                | ok     | M+H    |

HRMS (ESI) of compound **3ac**.

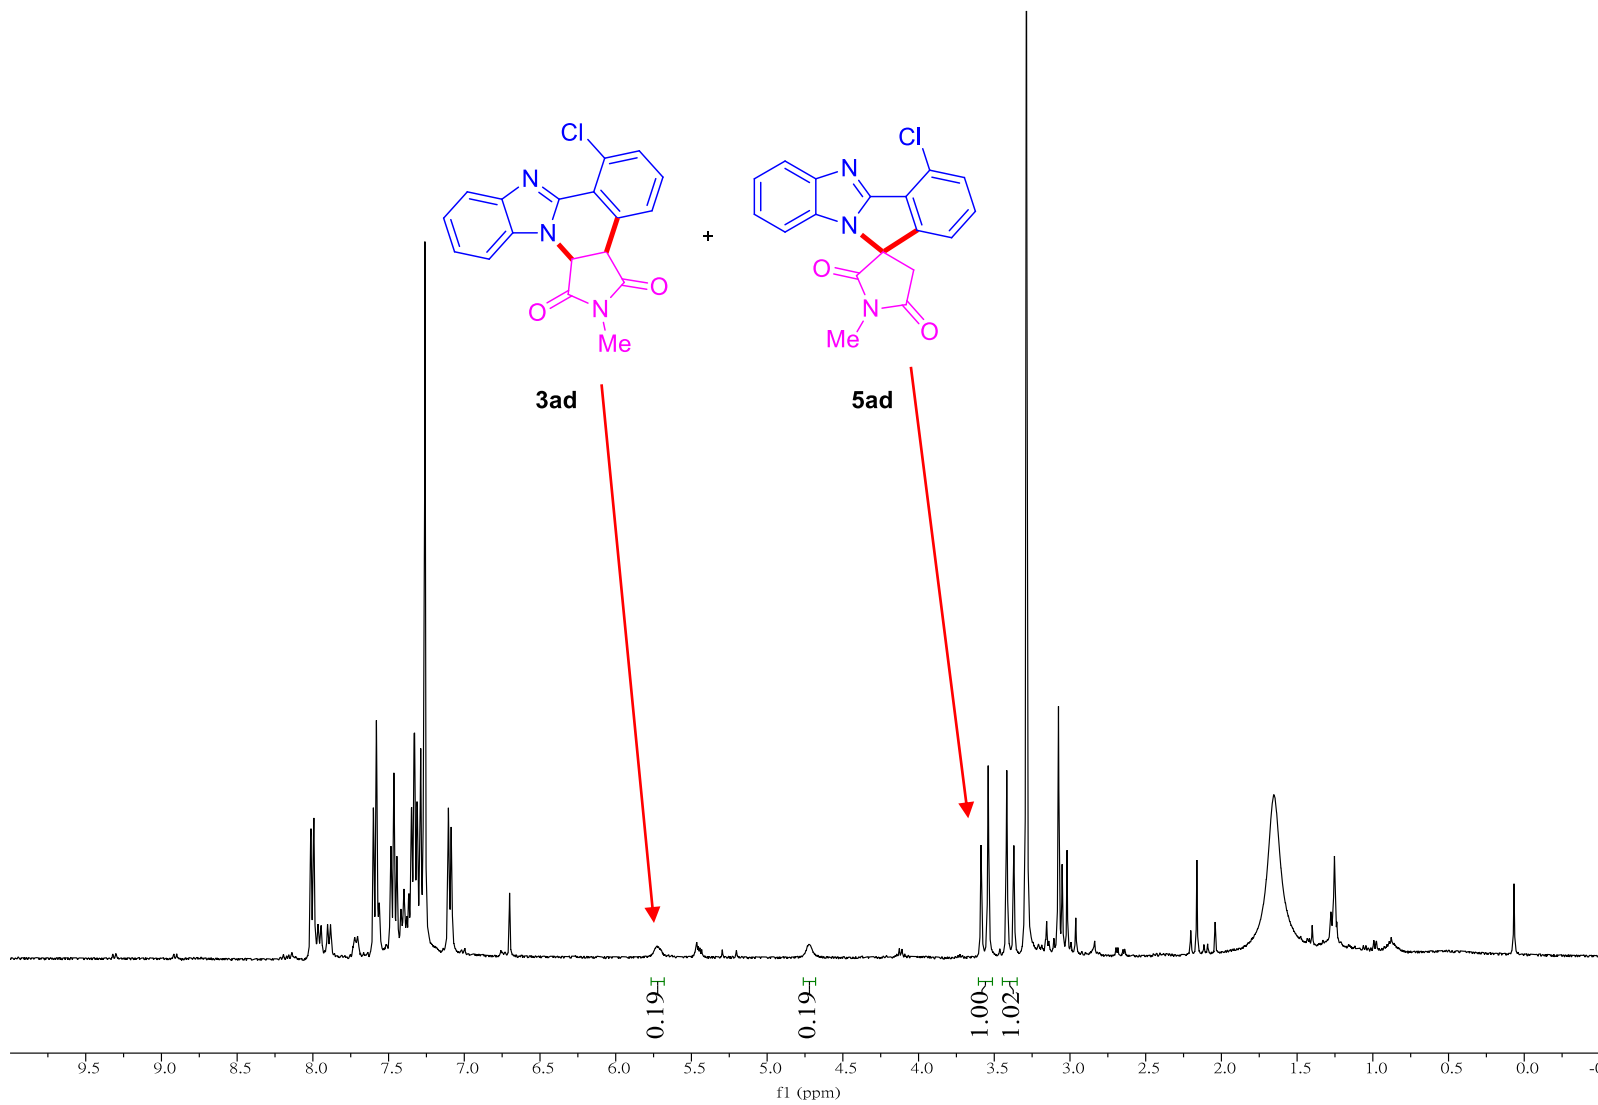

$^1\text{H}$  NMR spectrum (400 MHz) of compound **3ad** and **5ad** (ratio) in  $\text{CDCl}_3$ .

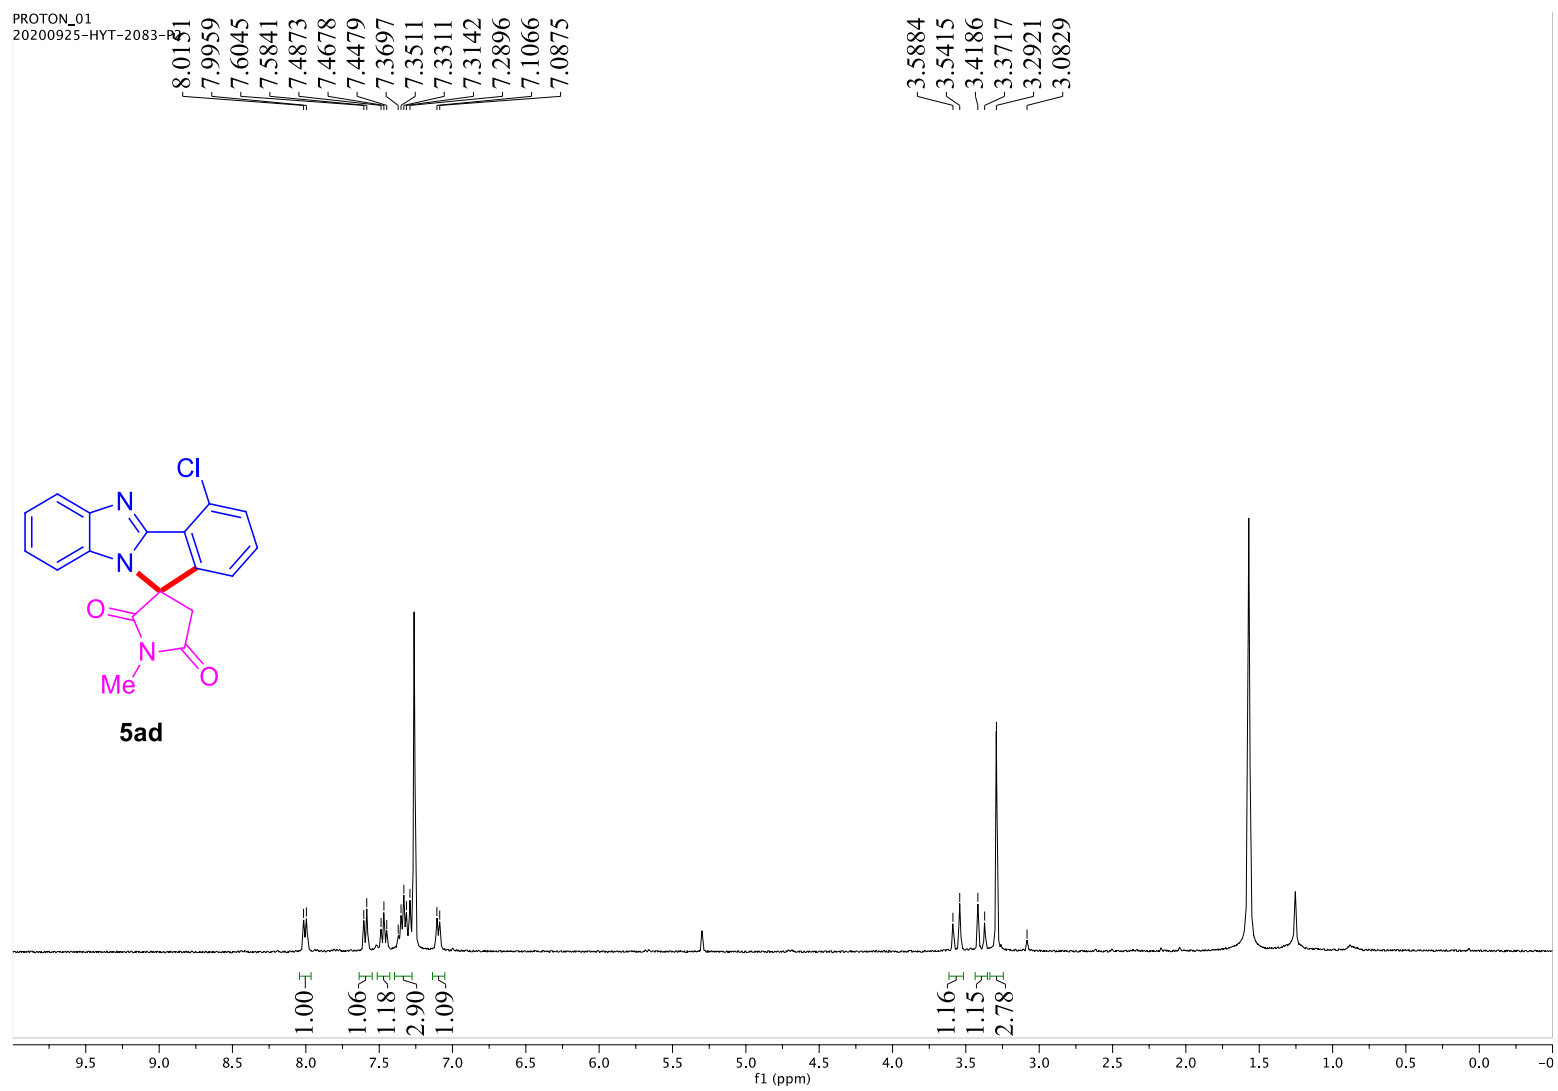

$^1\text{H}$  NMR spectrum (400 MHz) of compound **5ad** in  $\text{CDCl}_3$ .

CARBON\_02  
20210101-HYT-2083-P2

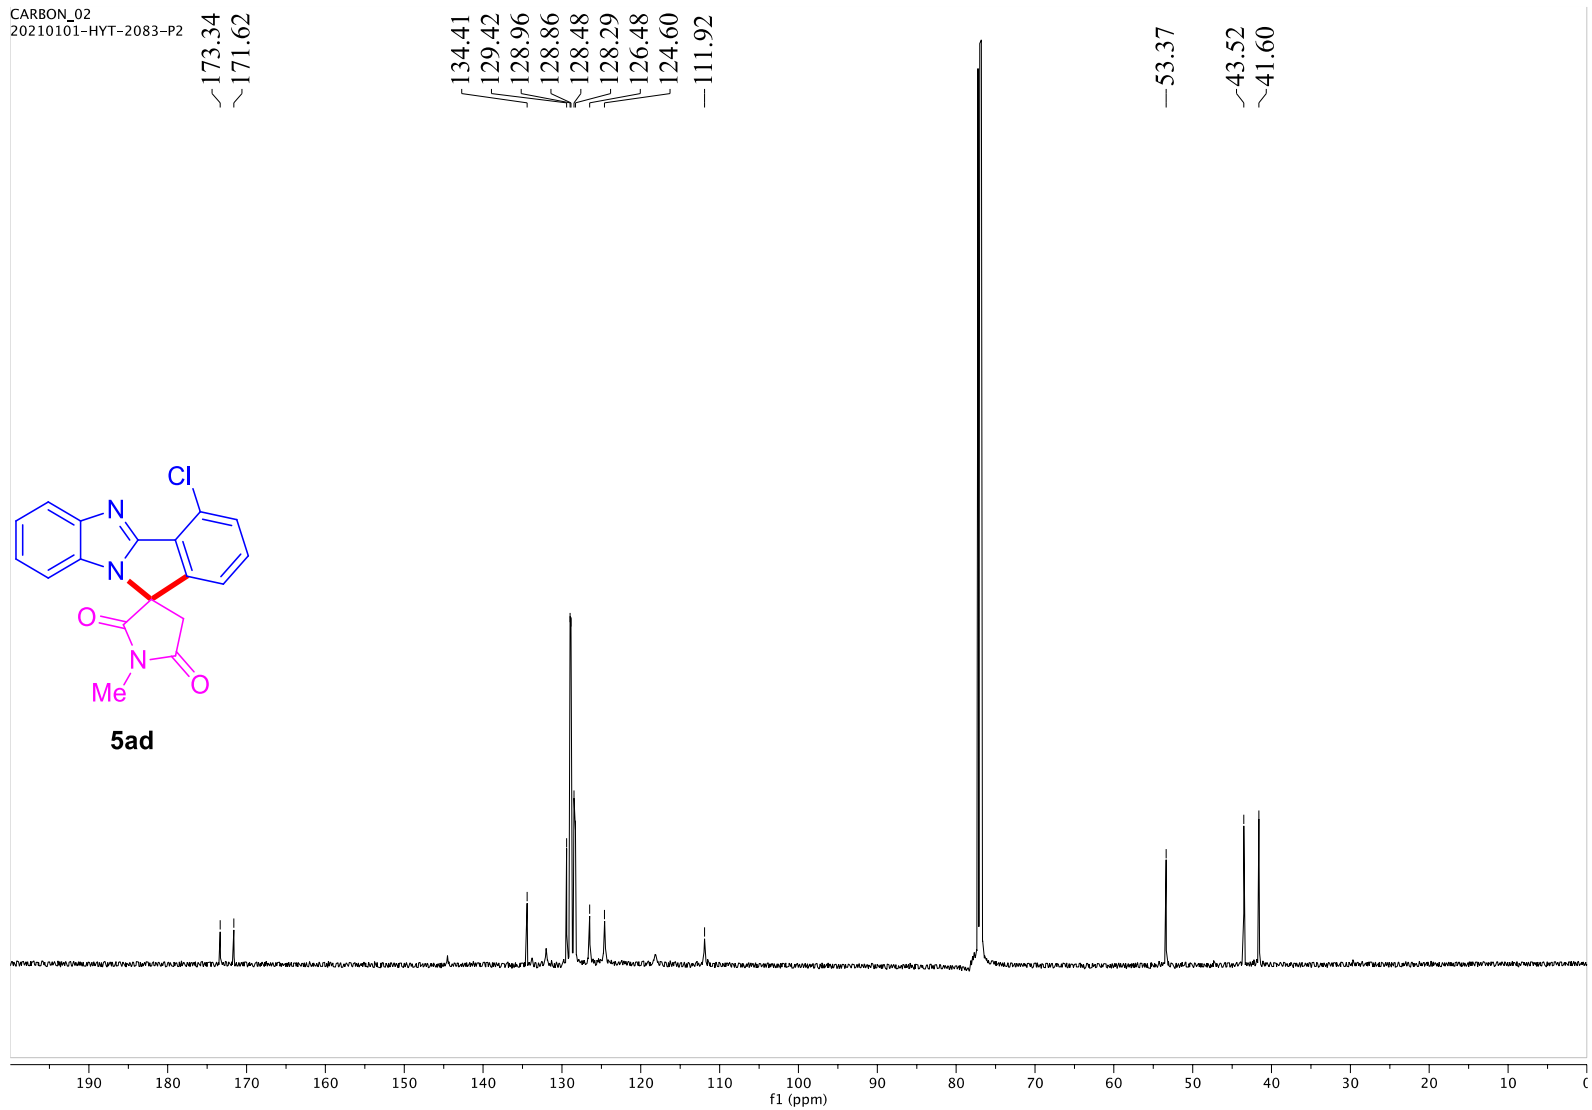

$^{13}\text{C}$  NMR spectrum (100 MHz) of compound **5ad** in  $\text{CDCl}_3$ .

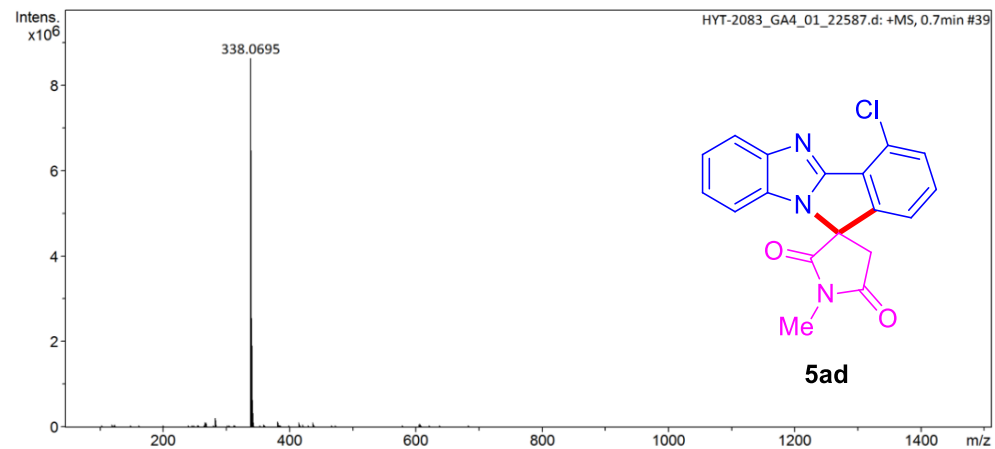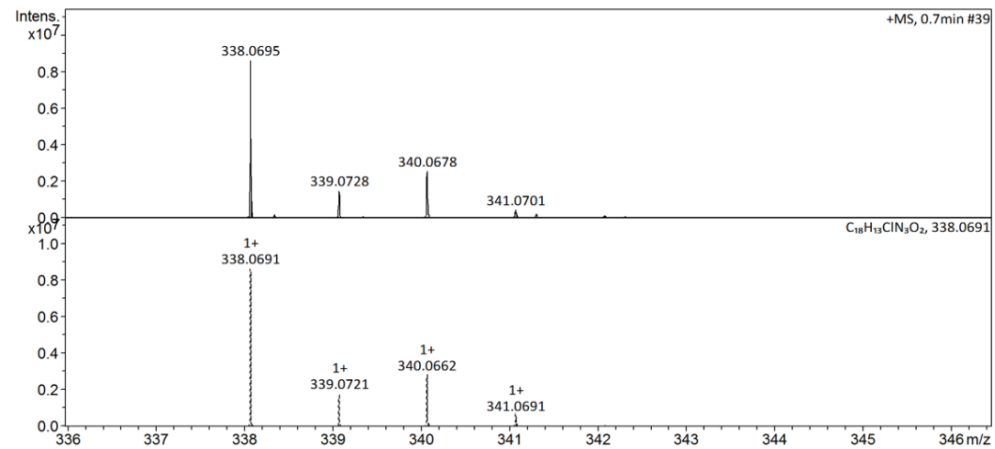

## Display Report

| Meas. m/z | # | Ion Formula                                                     | m/z      | err [ppm] | mSigma | # Sigma | Score  | rdb  | e <sup>-</sup> Conf | N-Rule | Adduct |
|-----------|---|-----------------------------------------------------------------|----------|-----------|--------|---------|--------|------|---------------------|--------|--------|
| 338.0695  | 1 | C <sub>18</sub> H <sub>13</sub> ClN <sub>3</sub> O <sub>2</sub> | 338.0691 | 1.4       | 27.8   | 1       | 100.00 | 13.5 | even                | ok     | M+H    |

HRMS (ESI) of compound **5ad**.

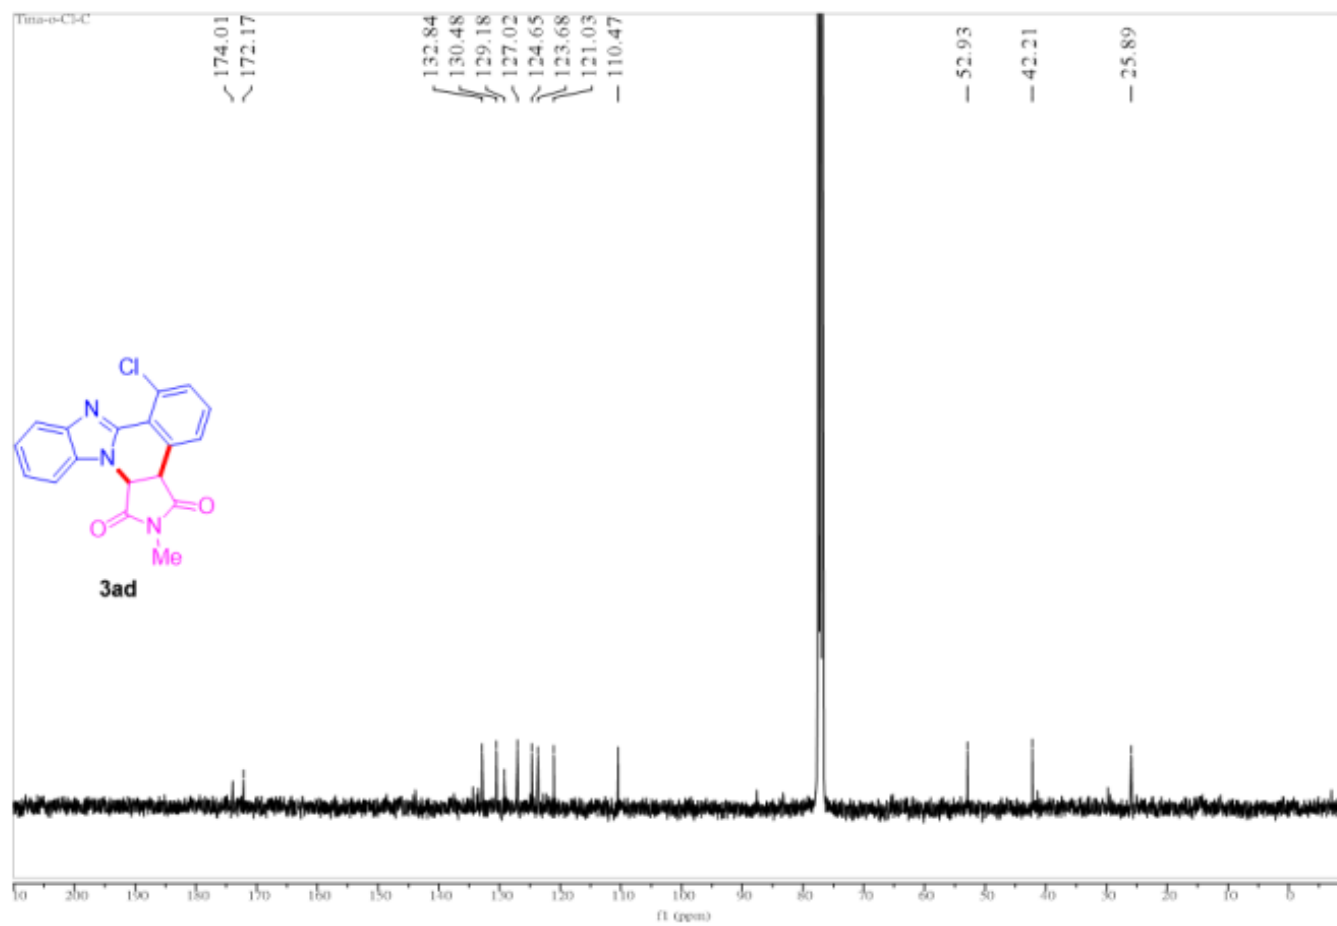

<sup>13</sup>C NMR spectrum (100 MHz) of compound **3ad** in CDCl<sub>3</sub>.

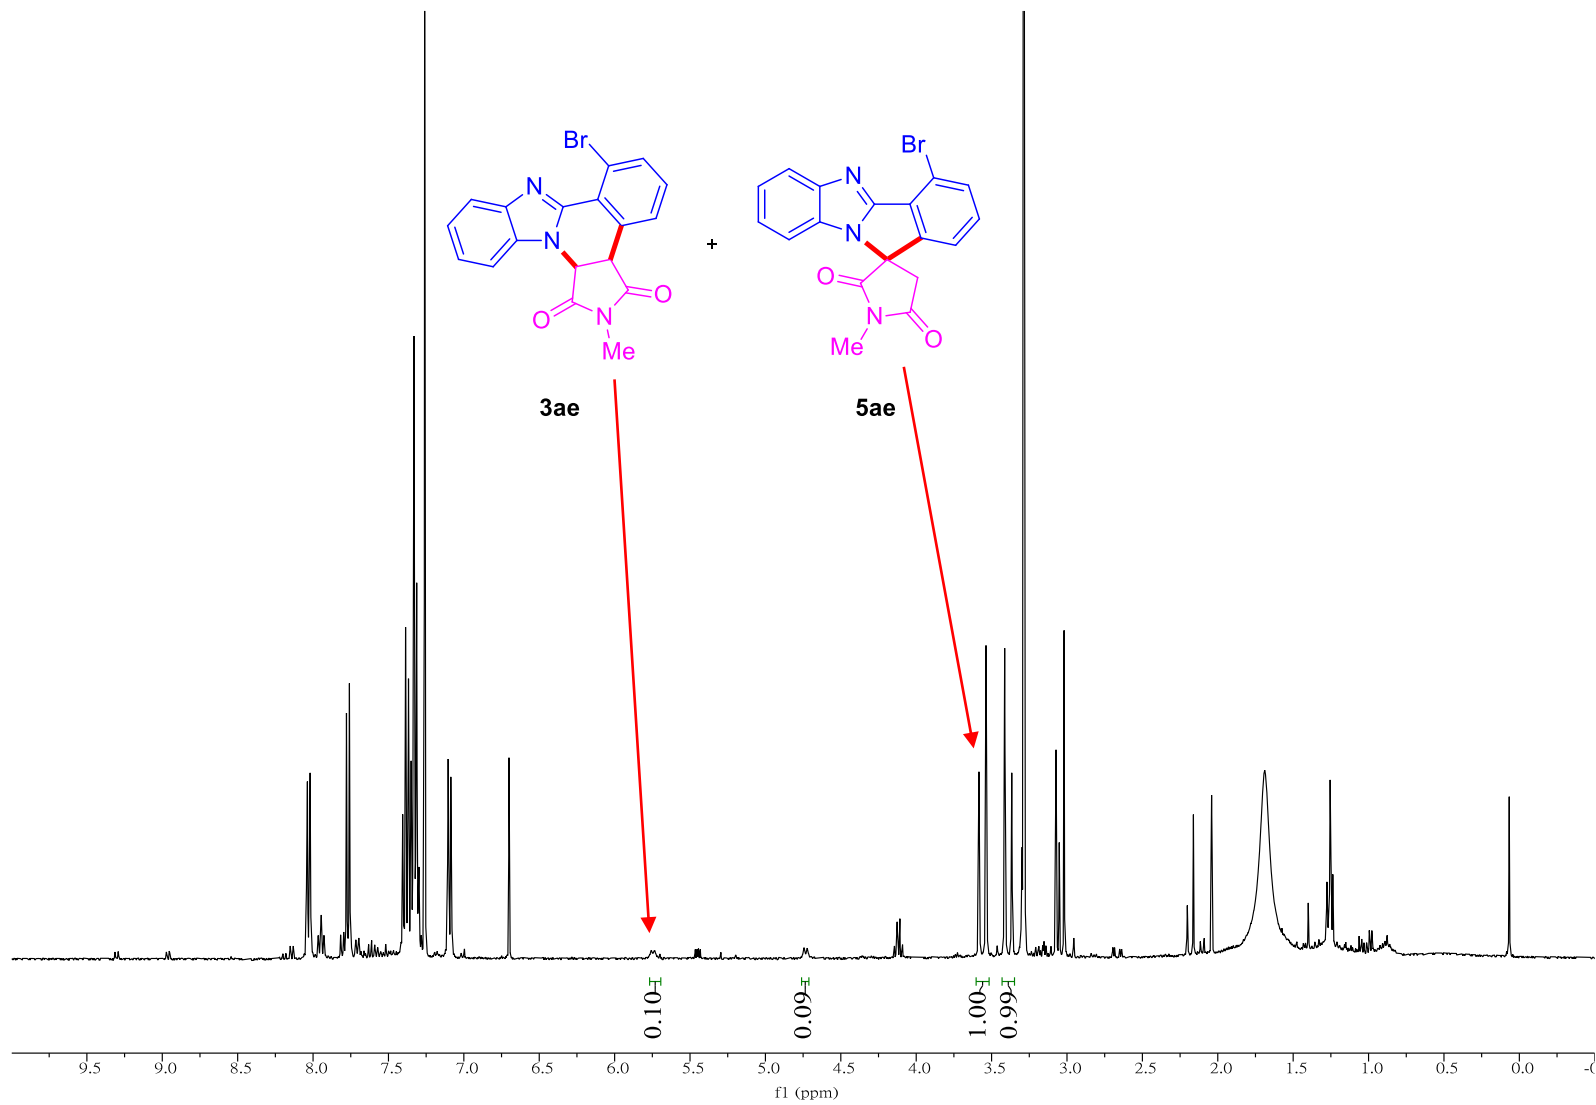

$^1\text{H}$  NMR spectrum (400 MHz) of compound **3ae** and **5ae** (ratio) in  $\text{CDCl}_3$ .



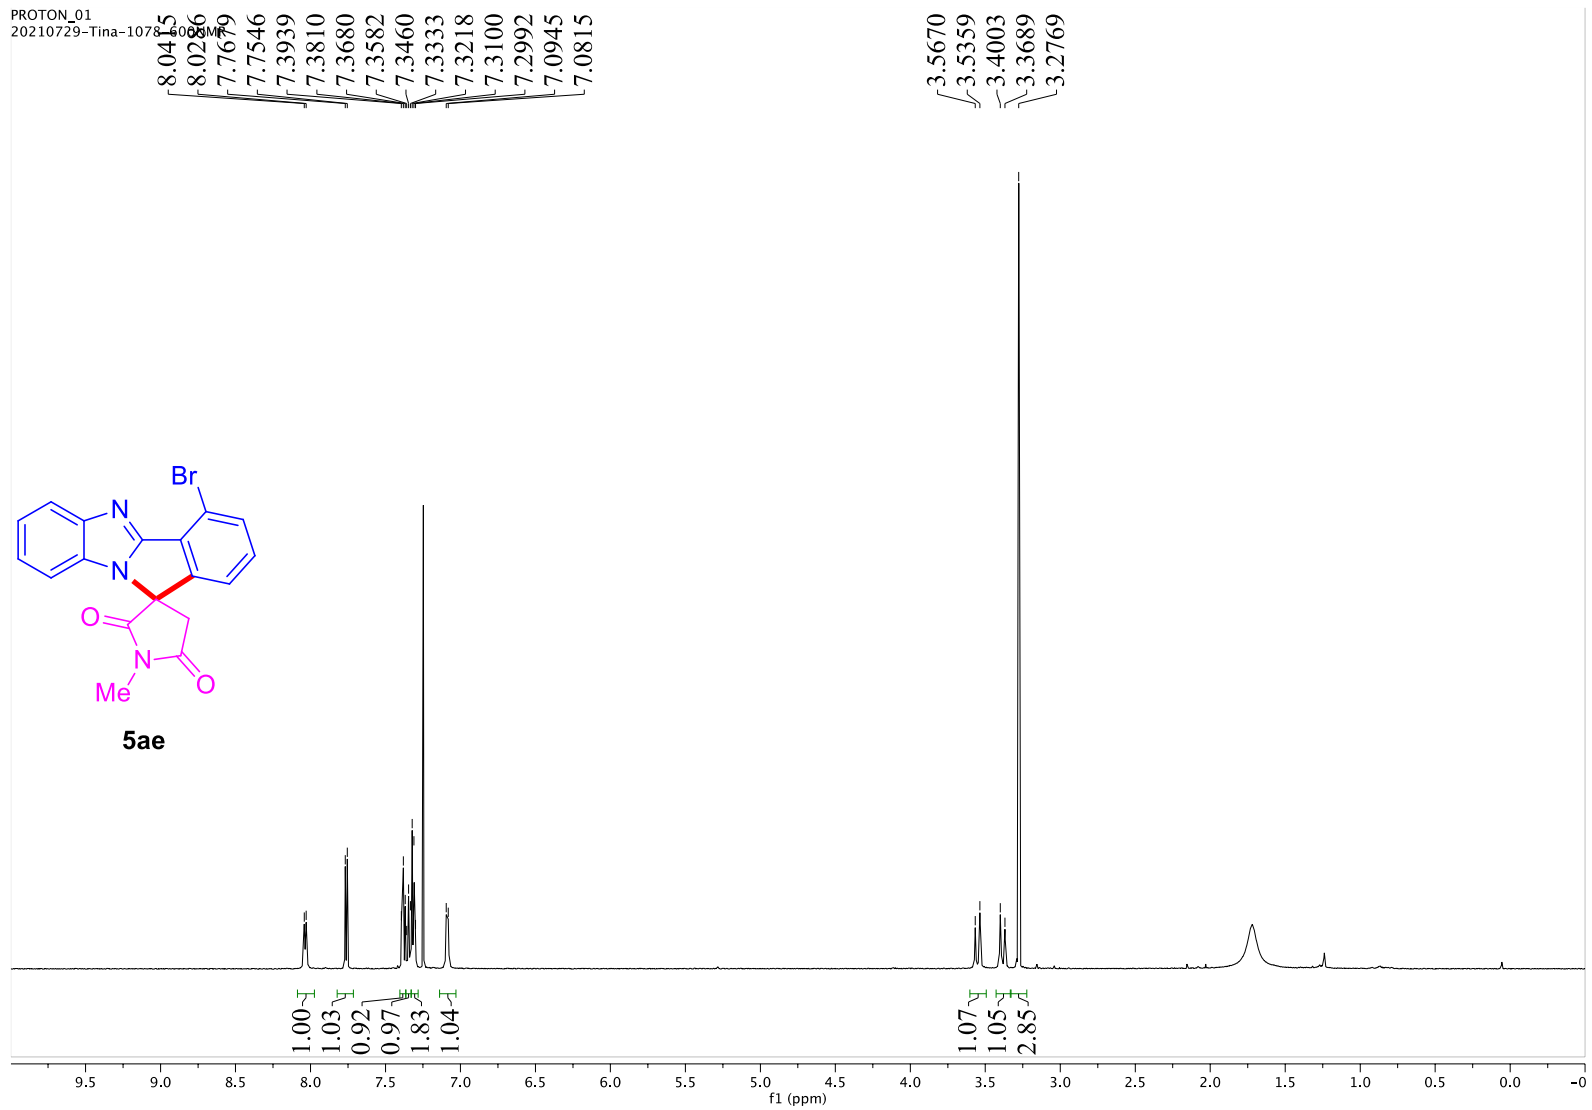

$^1\text{H}$  NMR spectrum (600 MHz) of compound **5ae** in  $\text{CDCl}_3$ .

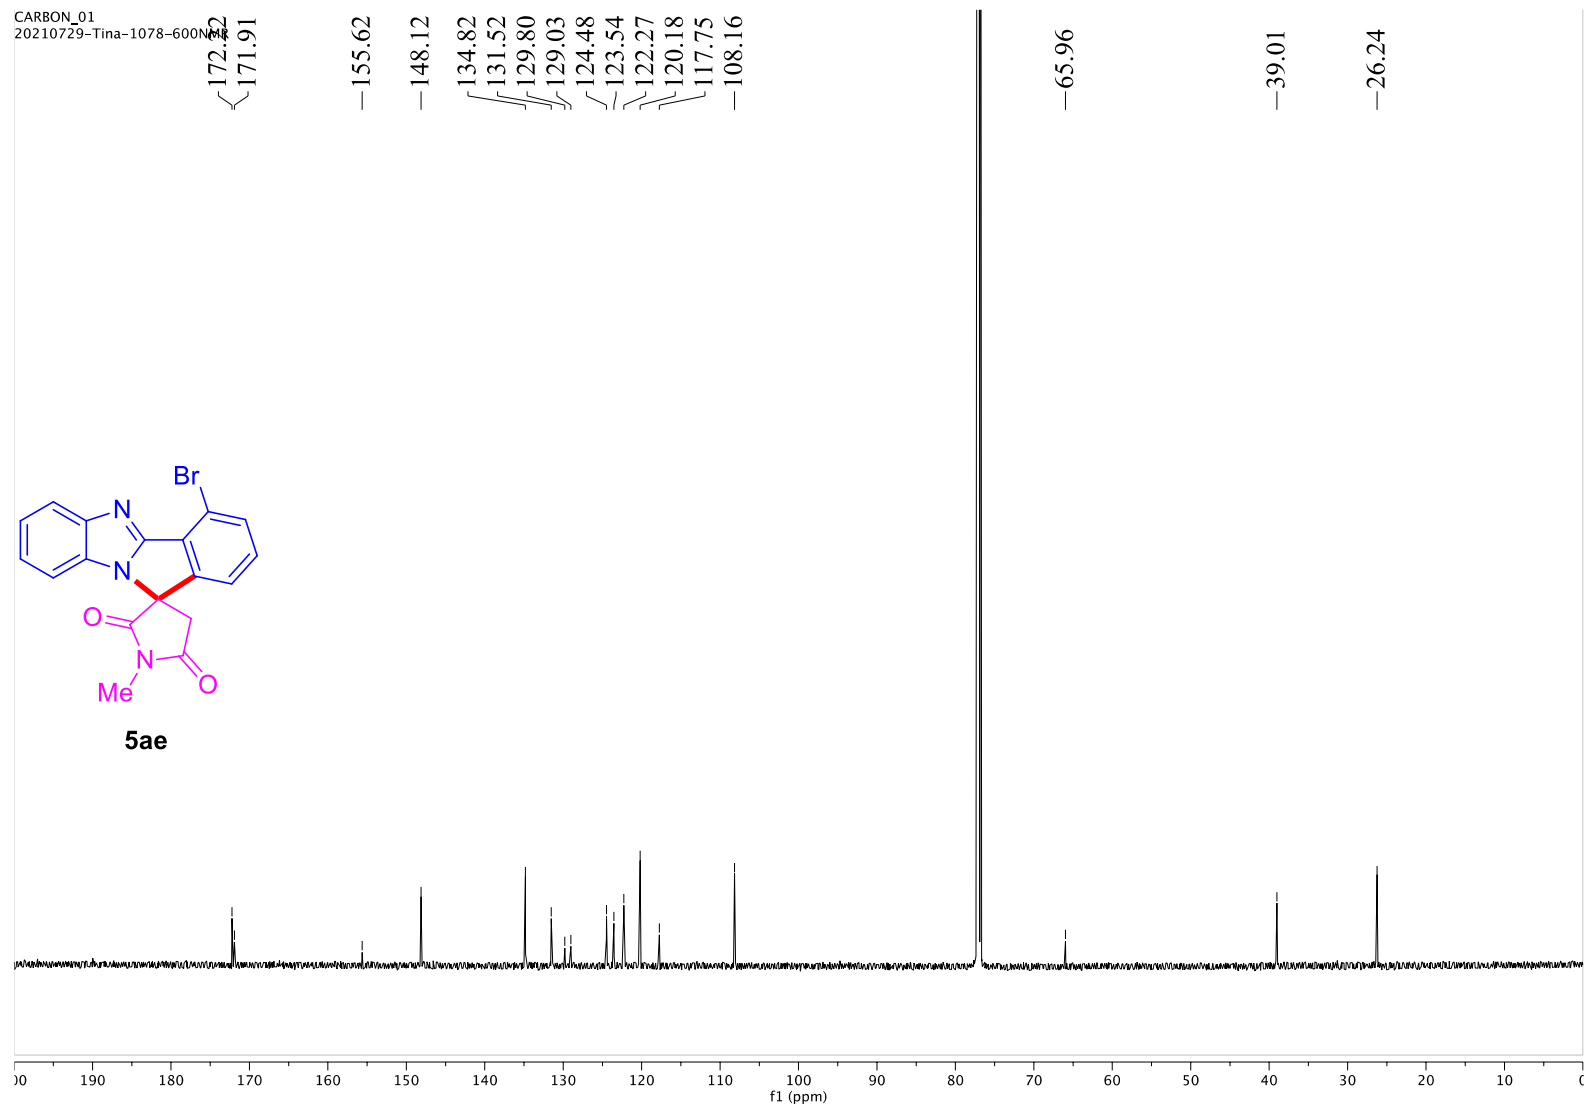

$^{13}\text{C}$  NMR spectrum (150 MHz) of compound **5ae** in  $\text{CDCl}_3$ .

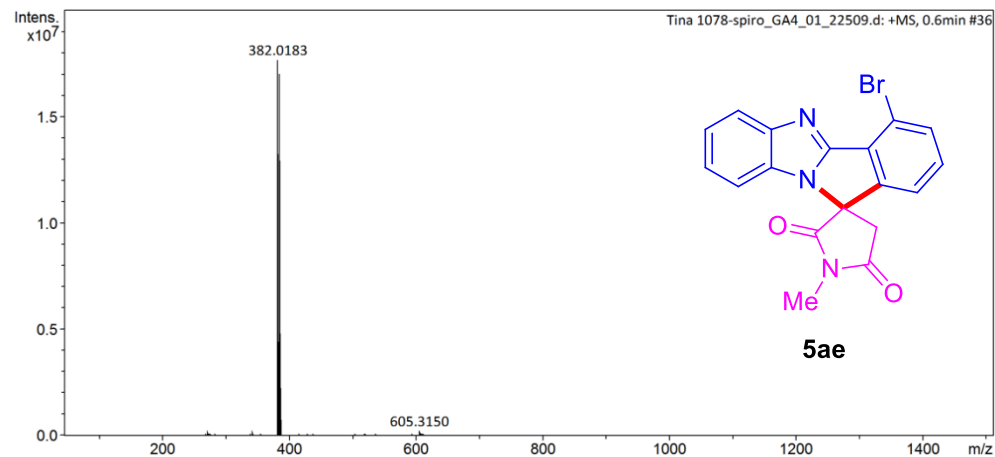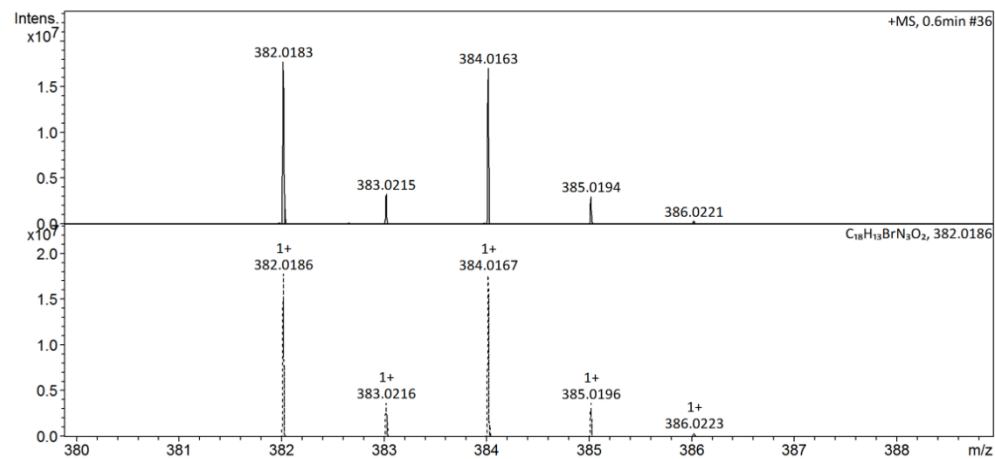

## Display Report

| Meas. m/z | # | Ion Formula                                                     | m/z      | err [ppm] | mSigma | # Sigma | Score  | rdb  | e <sup>-</sup> Conf | N-Rule | Adduct |
|-----------|---|-----------------------------------------------------------------|----------|-----------|--------|---------|--------|------|---------------------|--------|--------|
| 382.0183  | 1 | C <sub>18</sub> H <sub>13</sub> BrN <sub>3</sub> O <sub>2</sub> | 382.0186 | -0.8      | 24.6   | 1       | 100.00 | 13.5 | even                | ok     | M+H    |

HRMS (ESI) of compound **5ae**.

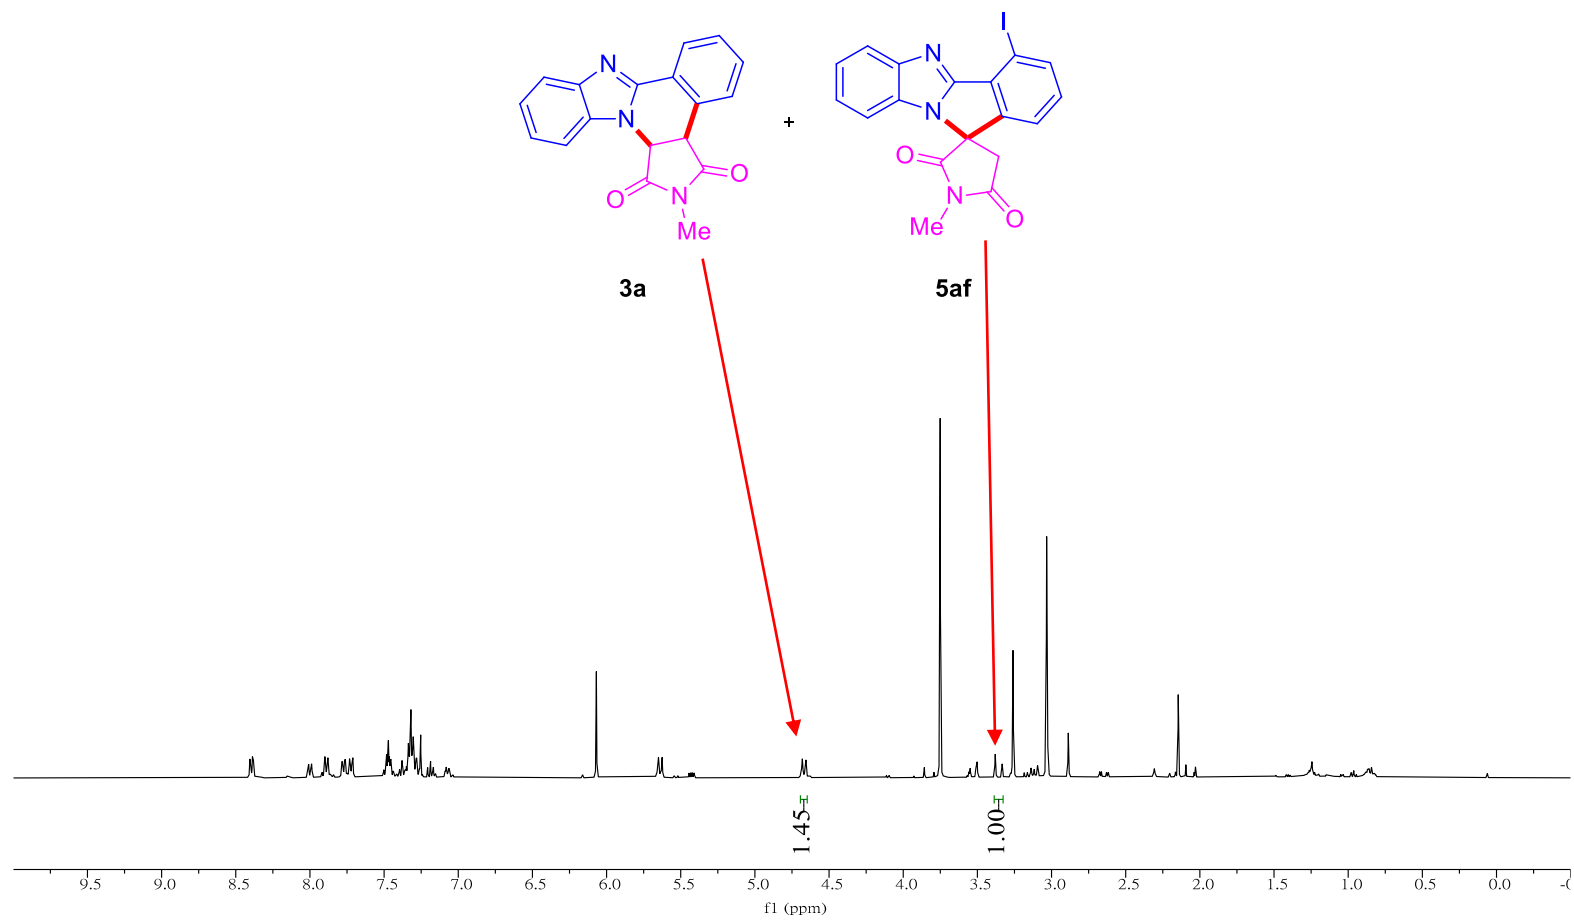

<sup>1</sup>H NMR spectrum (400 MHz) of compound **3a** and **5af** (ratio) in CDCl<sub>3</sub>.

Tina-3095

20211109001 35 (2.397) Cn (Cen.3, 80.00, Ht); Sm (Mn, 2x0.75); Sb (3,50.00); Cm (35:36-(34+20:31))

Scan ES+  
1.19e7

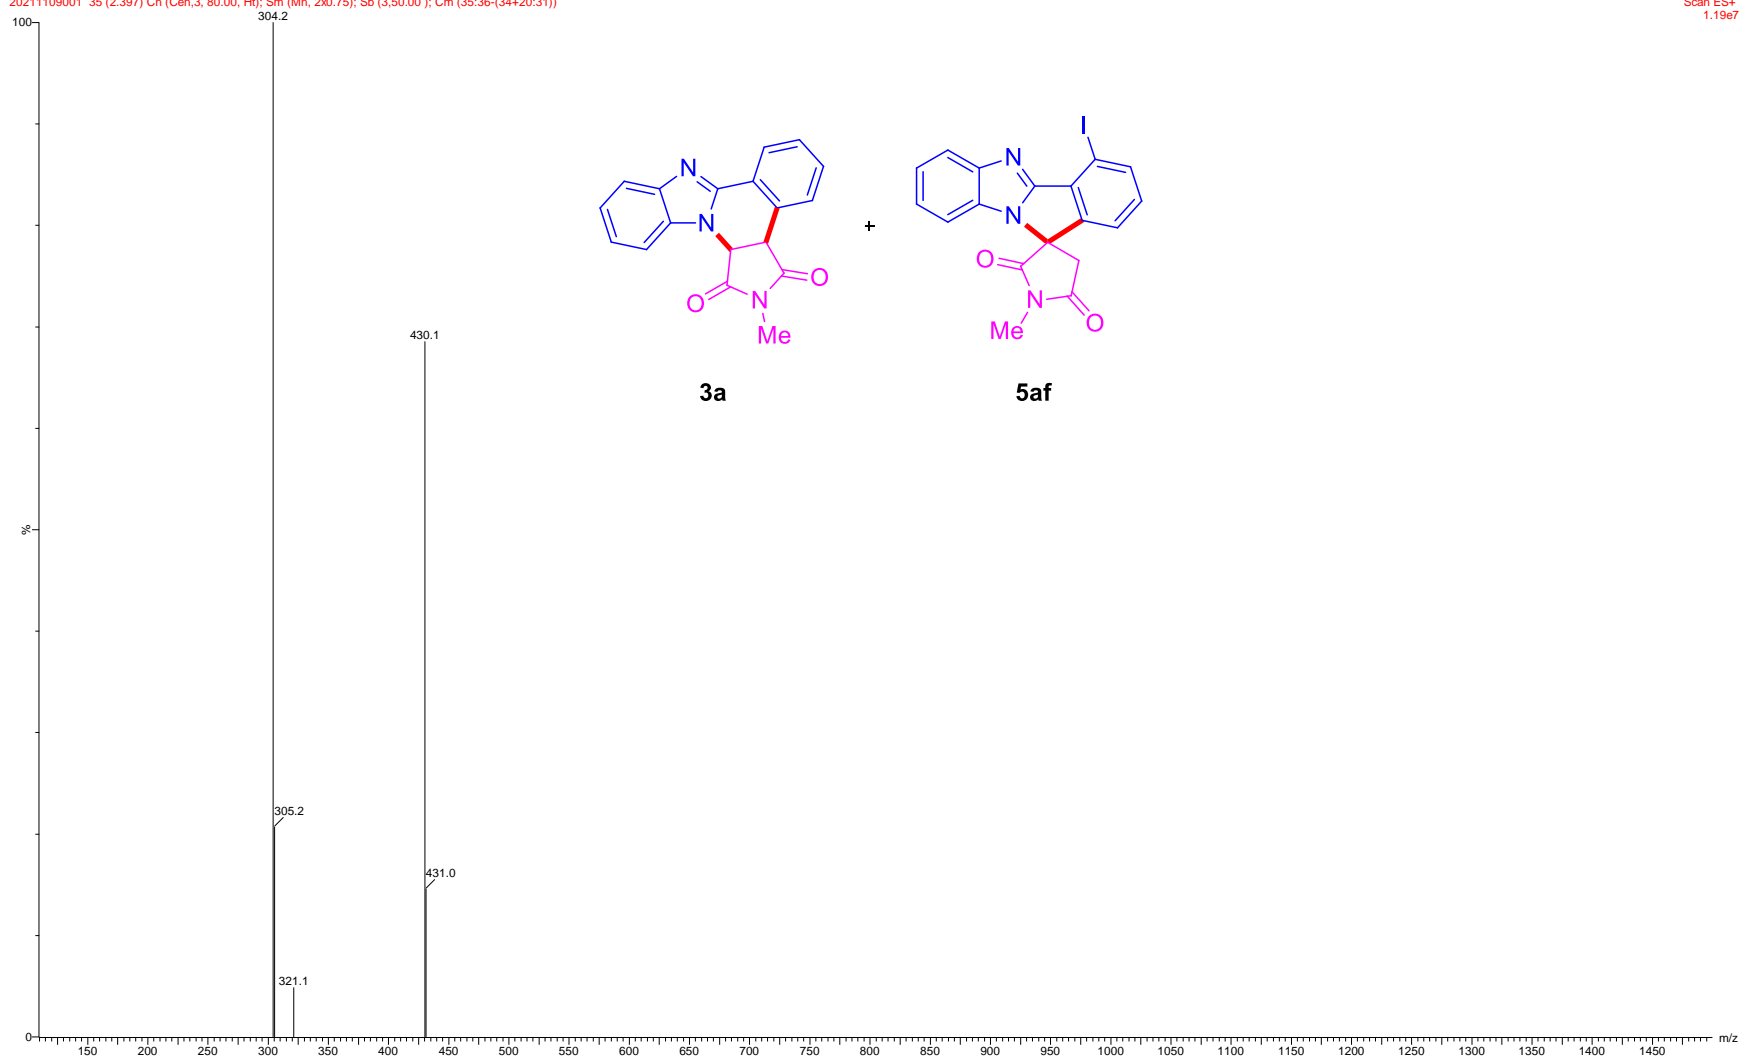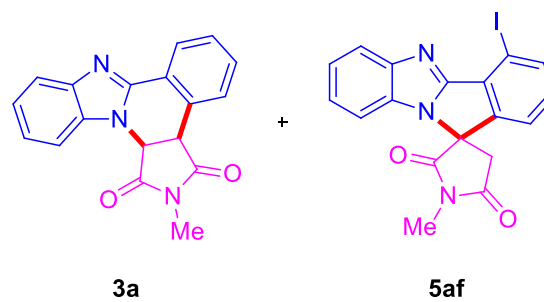

LRMS (ESI) of compound **3a** and **5af**.

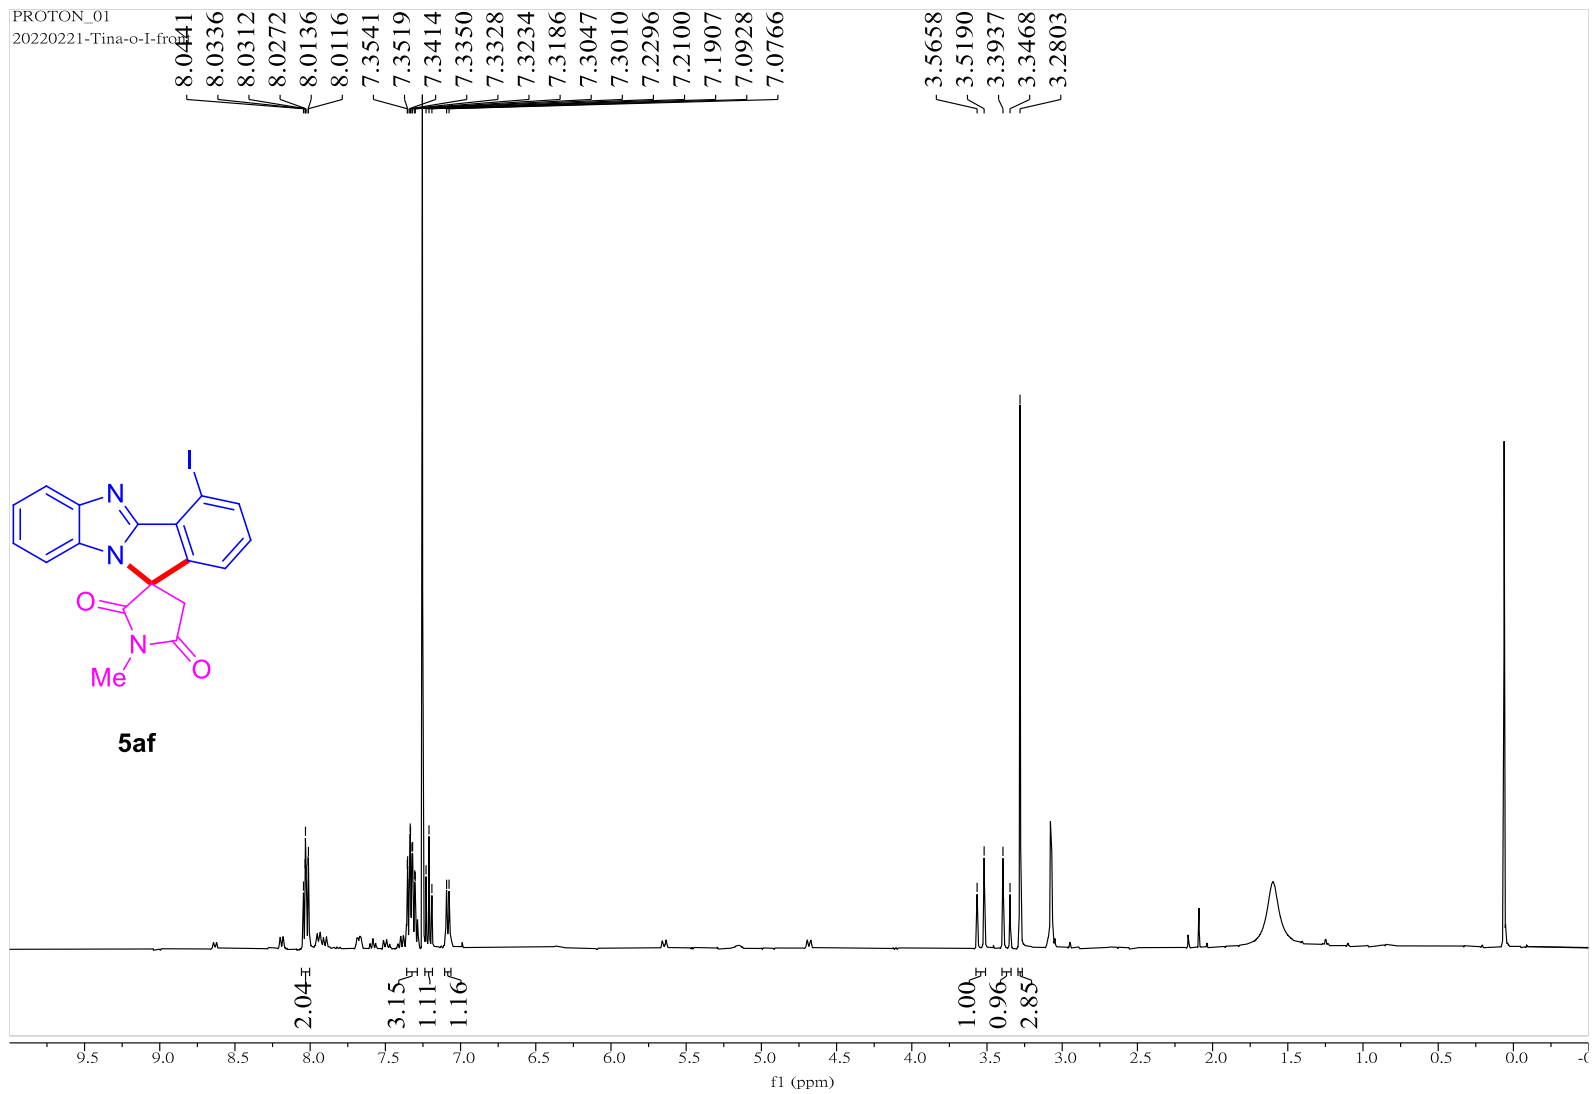

$^1\text{H}$  NMR spectrum (400 MHz) of compound **5af** in  $\text{CDCl}_3$ .

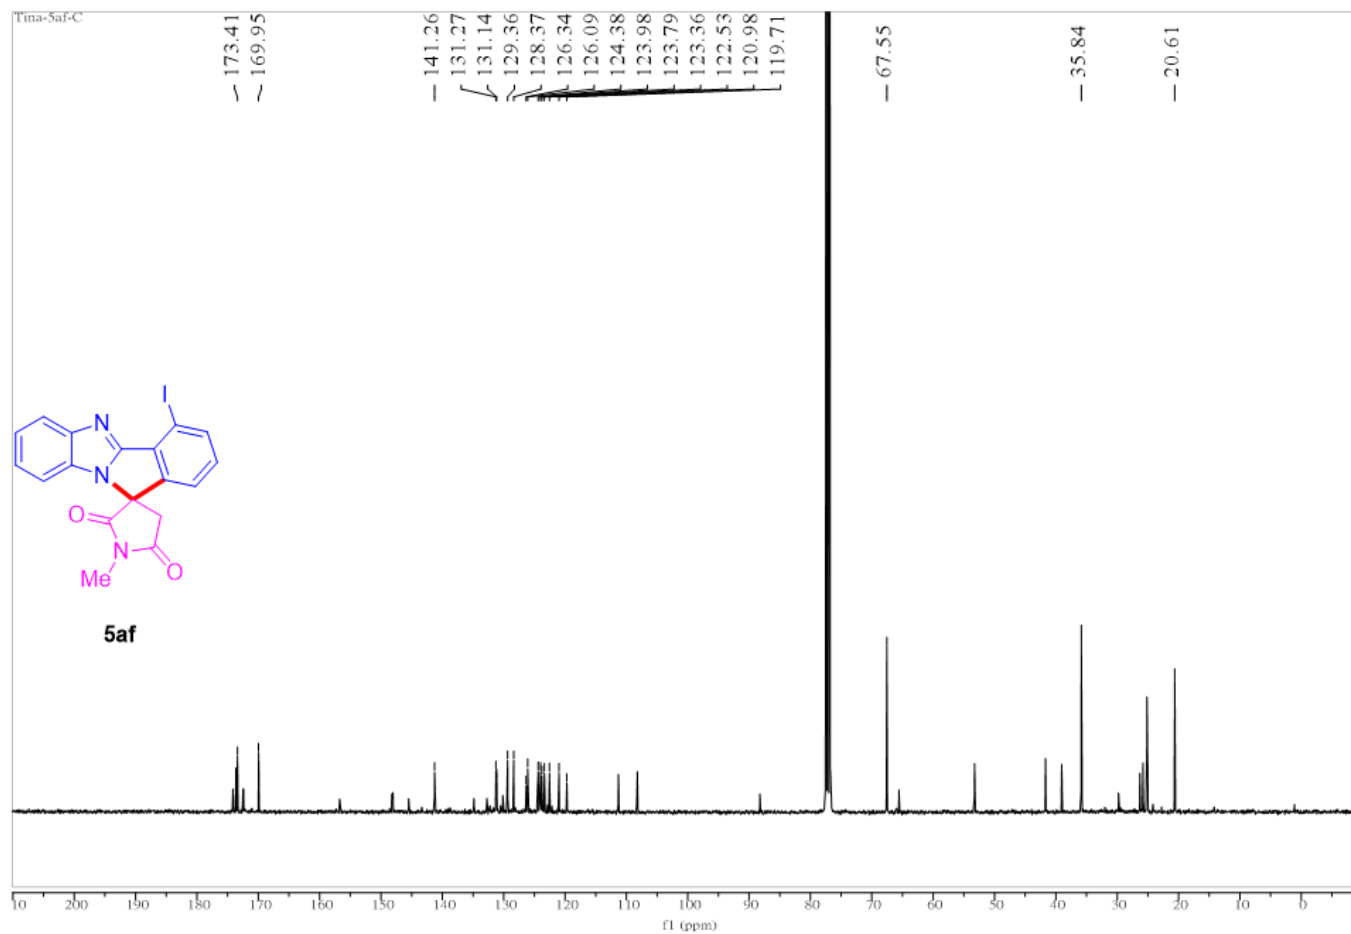

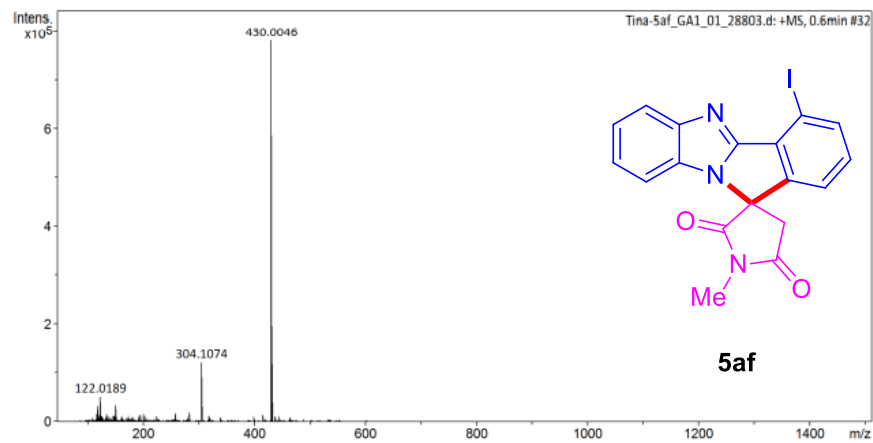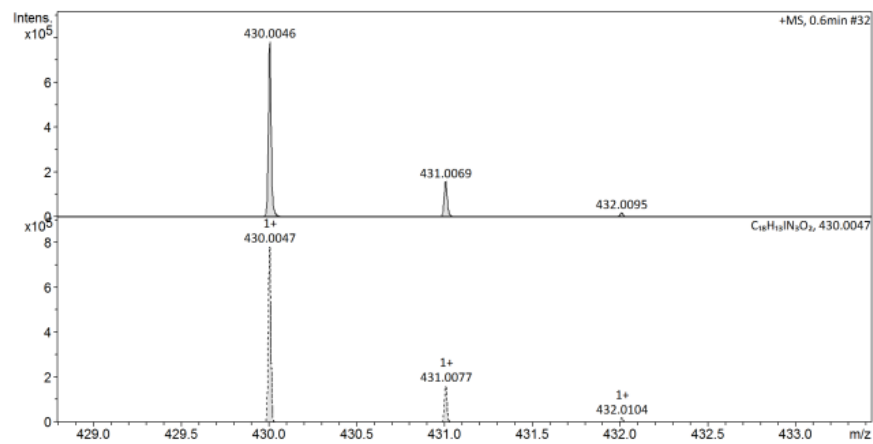

## Display Report

| Meas. m/z | # | Ion Formula                                                    | m/z      | err [ppm] | mSigma | # Sigma | Score  | rdb  | e <sup>-</sup> Conf | N-Rule | Adduct |
|-----------|---|----------------------------------------------------------------|----------|-----------|--------|---------|--------|------|---------------------|--------|--------|
| 430.0046  | 1 | C <sub>18</sub> H <sub>13</sub> IN <sub>3</sub> O <sub>2</sub> | 430.0047 | 0.4       | 4.1    | 1       | 100.00 | 13.5 | even                | ok     | M+H    |

HRMS (ESI) of compound **5af**.



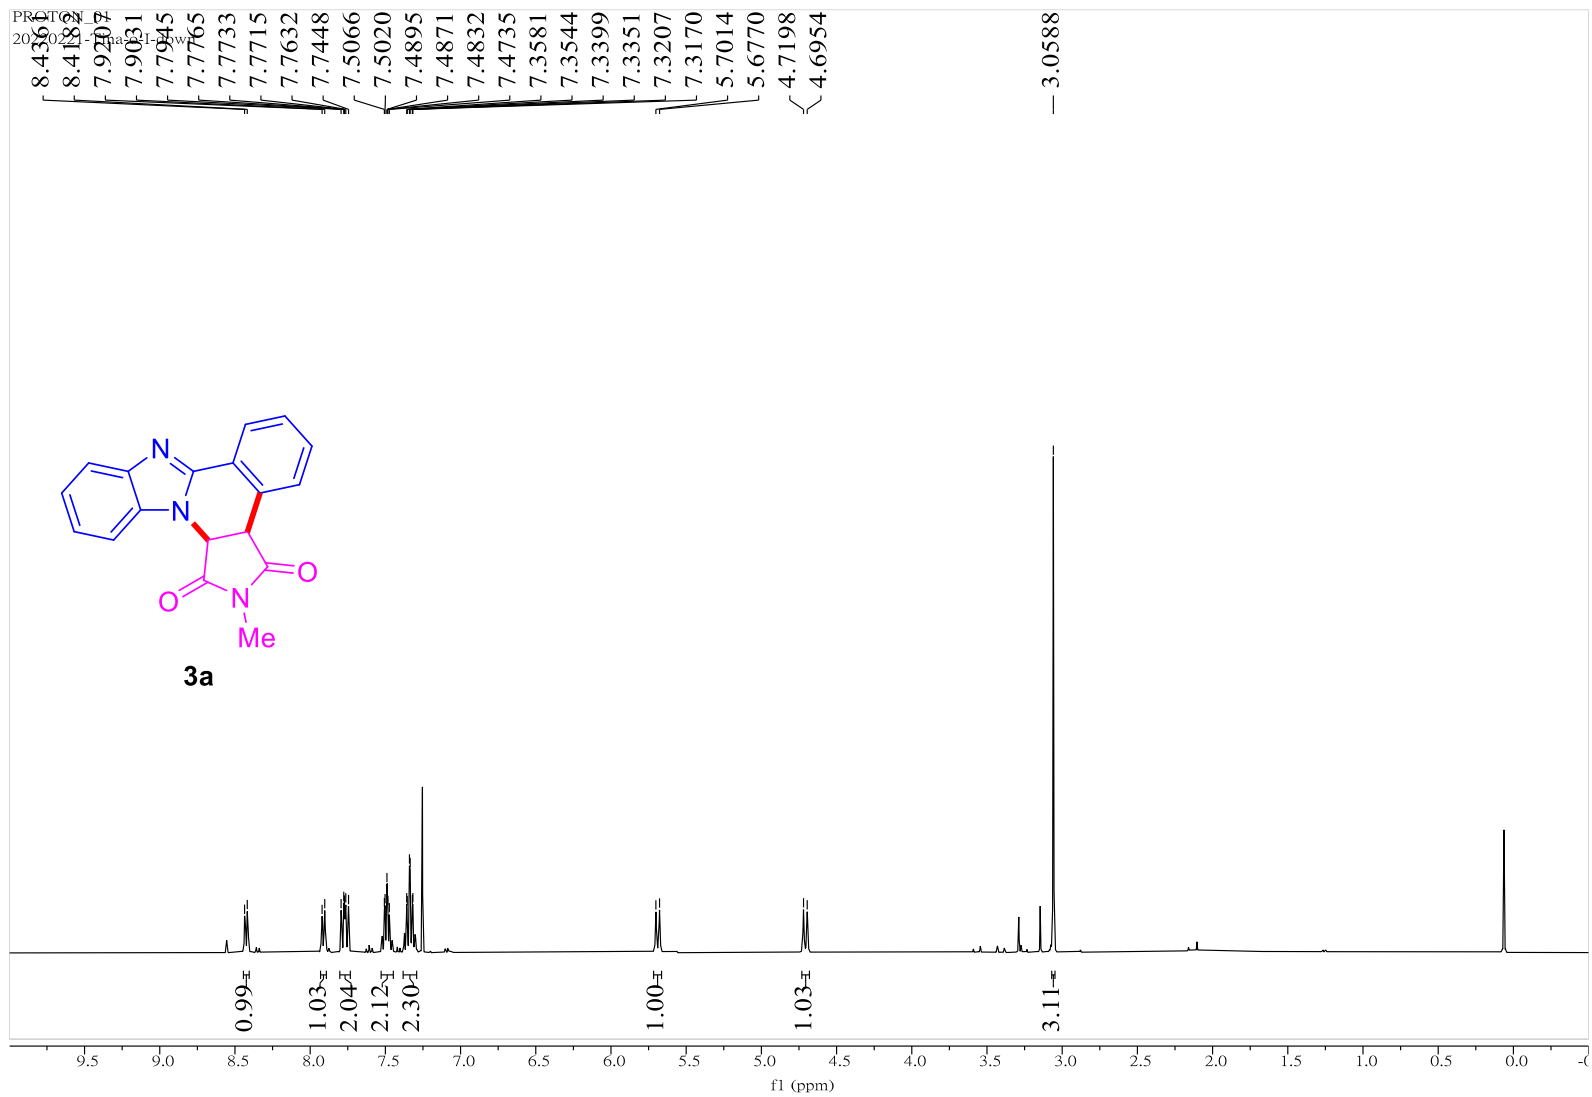

$^1\text{H}$  NMR spectrum (400 MHz) of compound **3a** in  $\text{CDCl}_3$ .

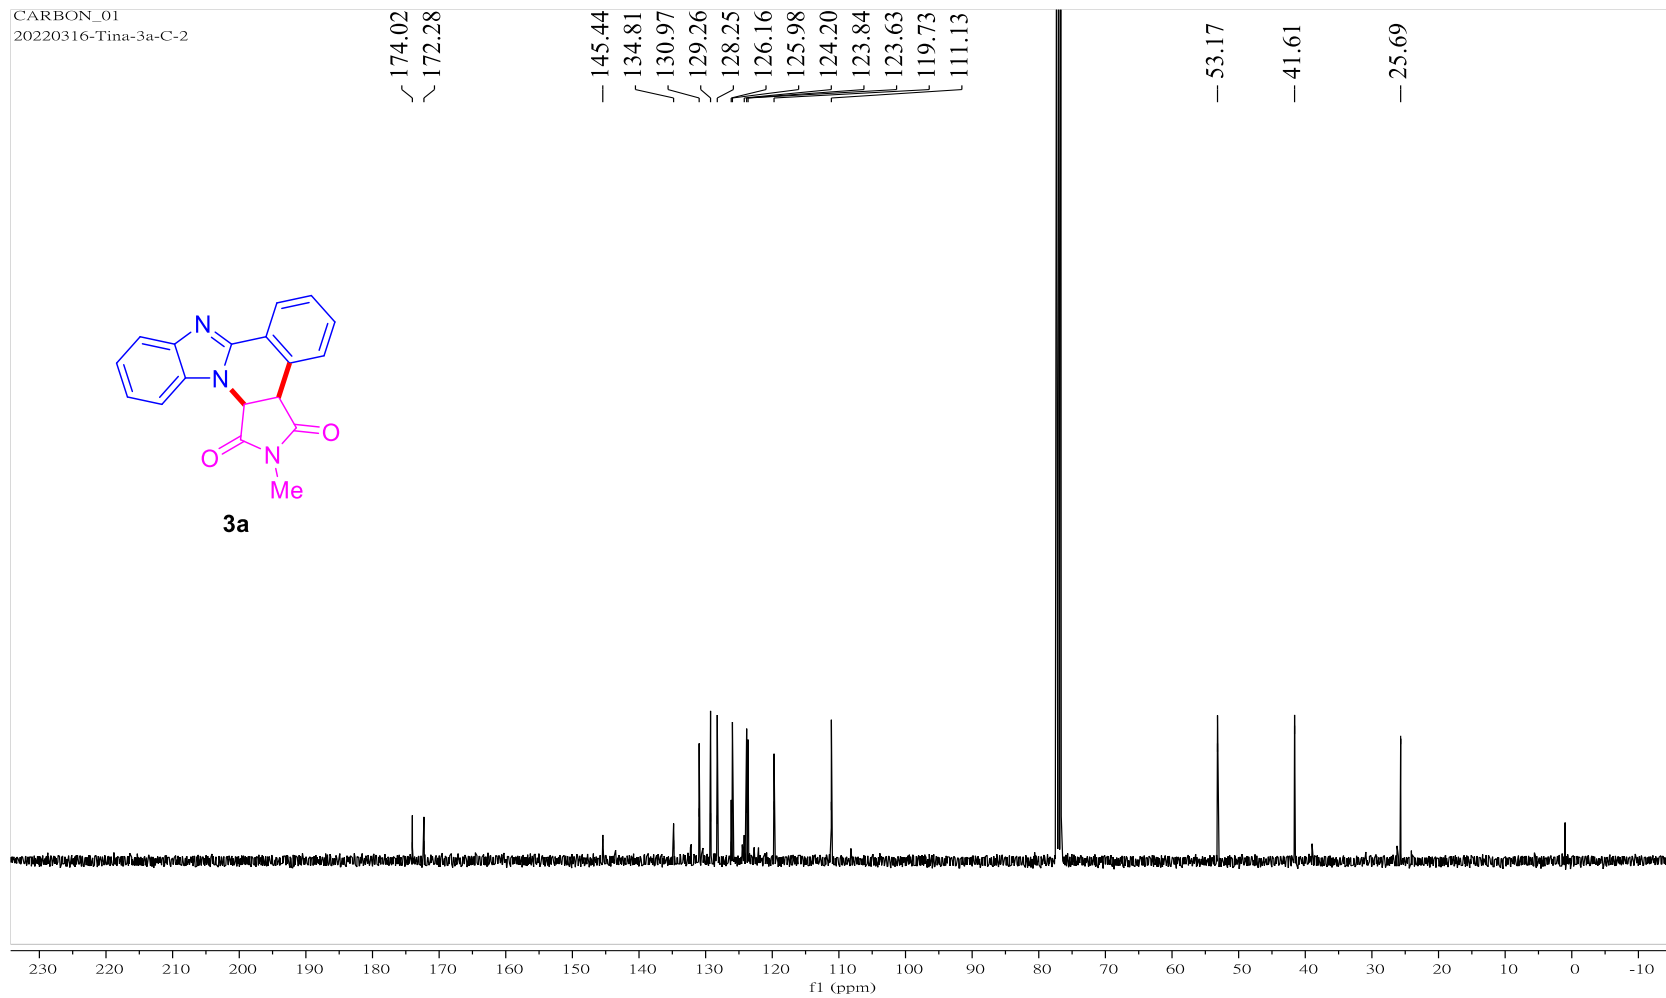

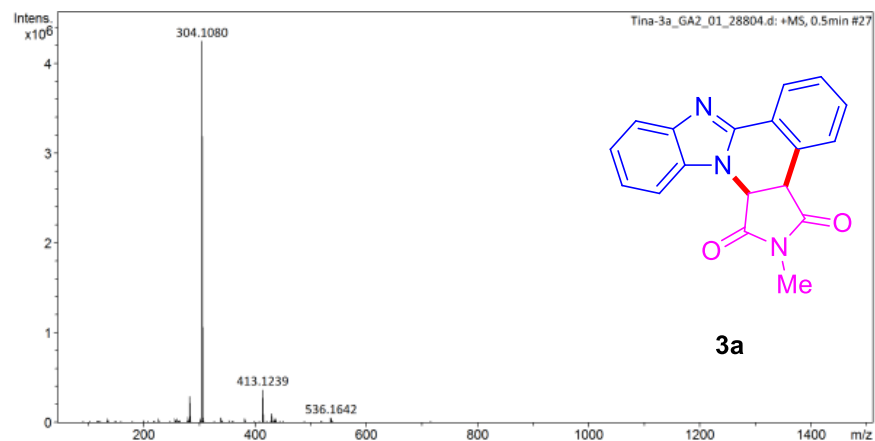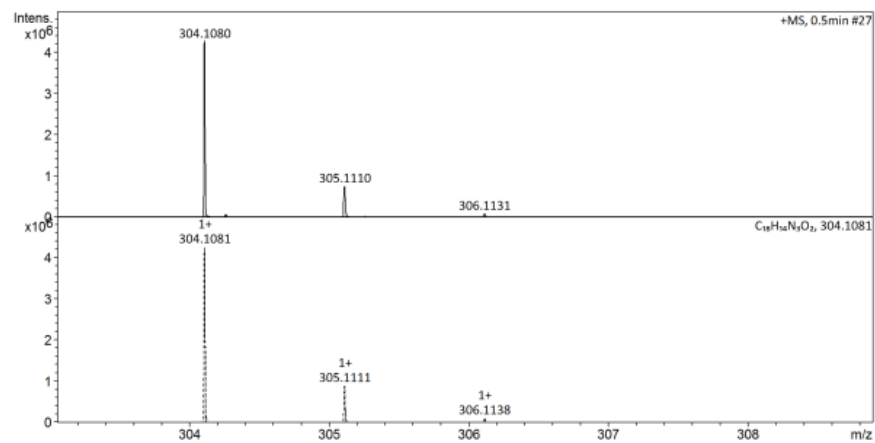

### Display Report

| Meas. m/z | # | Ion Formula                                                   | m/z      | err [ppm] | mSigma | # Sigma | Score  | rdb  | e <sup>-</sup> Conf | N-Rule | Adduct |
|-----------|---|---------------------------------------------------------------|----------|-----------|--------|---------|--------|------|---------------------|--------|--------|
| 304.1080  | 1 | C <sub>18</sub> H <sub>14</sub> N <sub>3</sub> O <sub>2</sub> | 304.1081 | -0.2      | 18.7   | 1       | 100.00 | 13.5 | even                | ok     | M+H    |

HRMS (ESI) of compound **3a**.

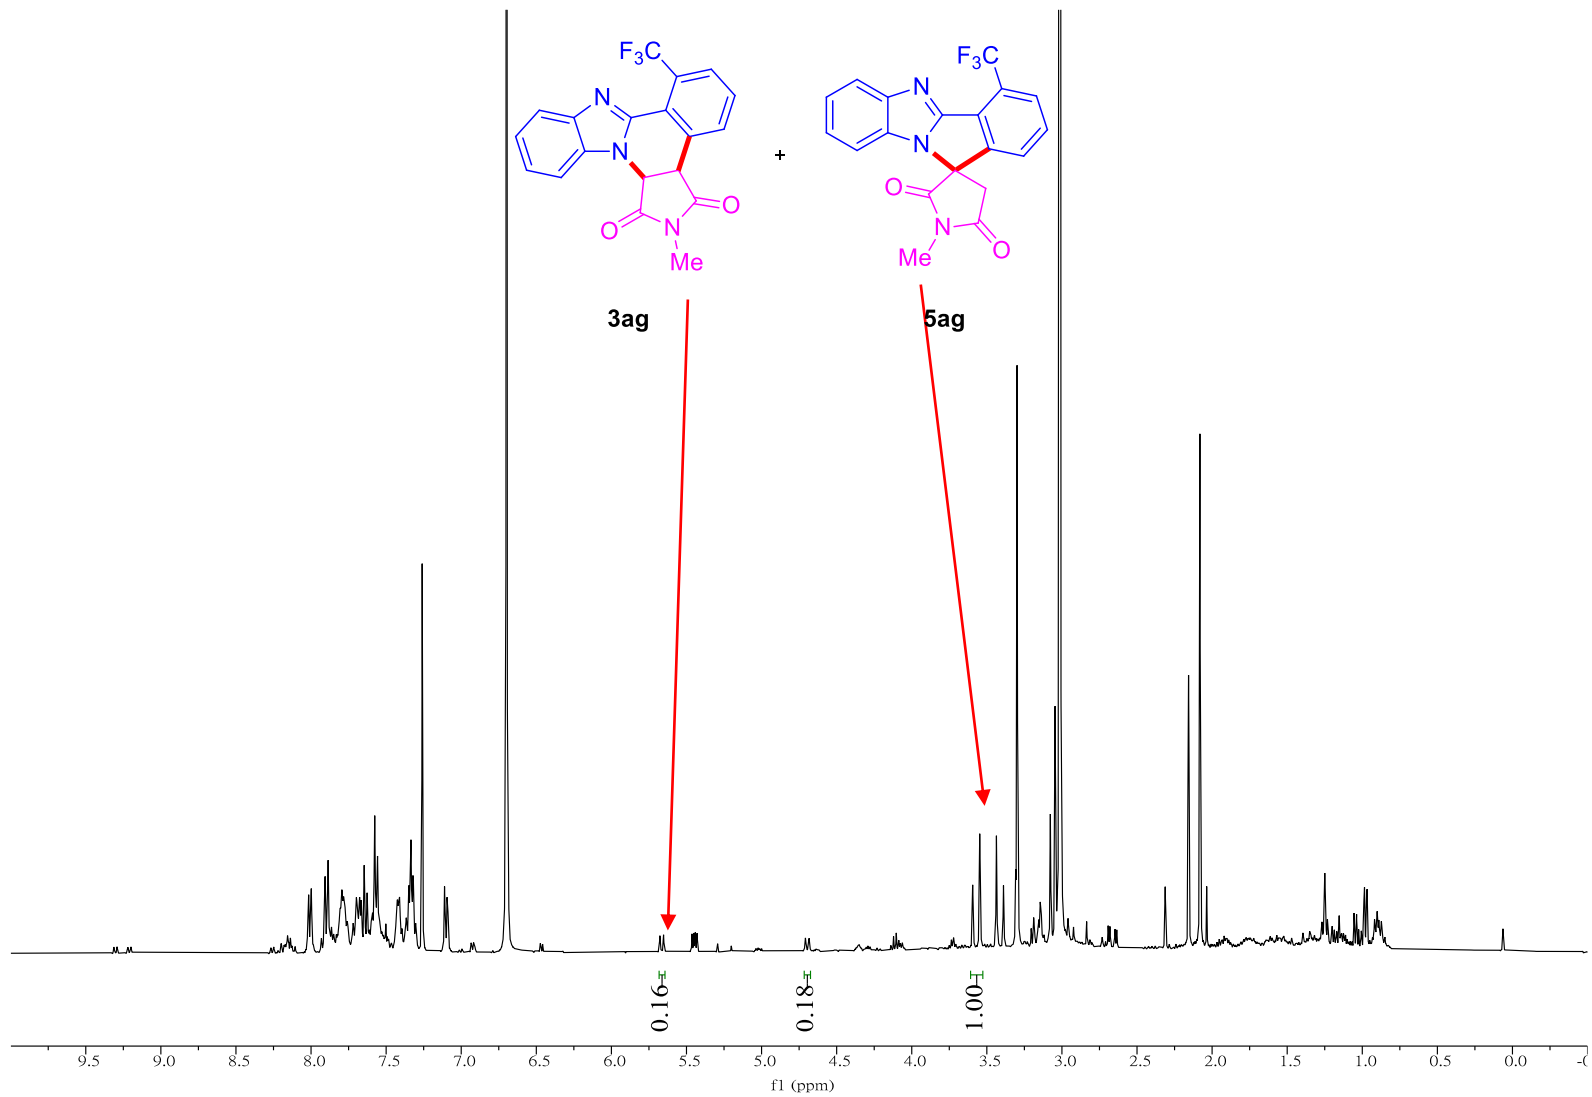

$^1\text{H}$  NMR spectrum (400 MHz) of compound **3ag** and **5ag** in  $\text{CDCl}_3$ .

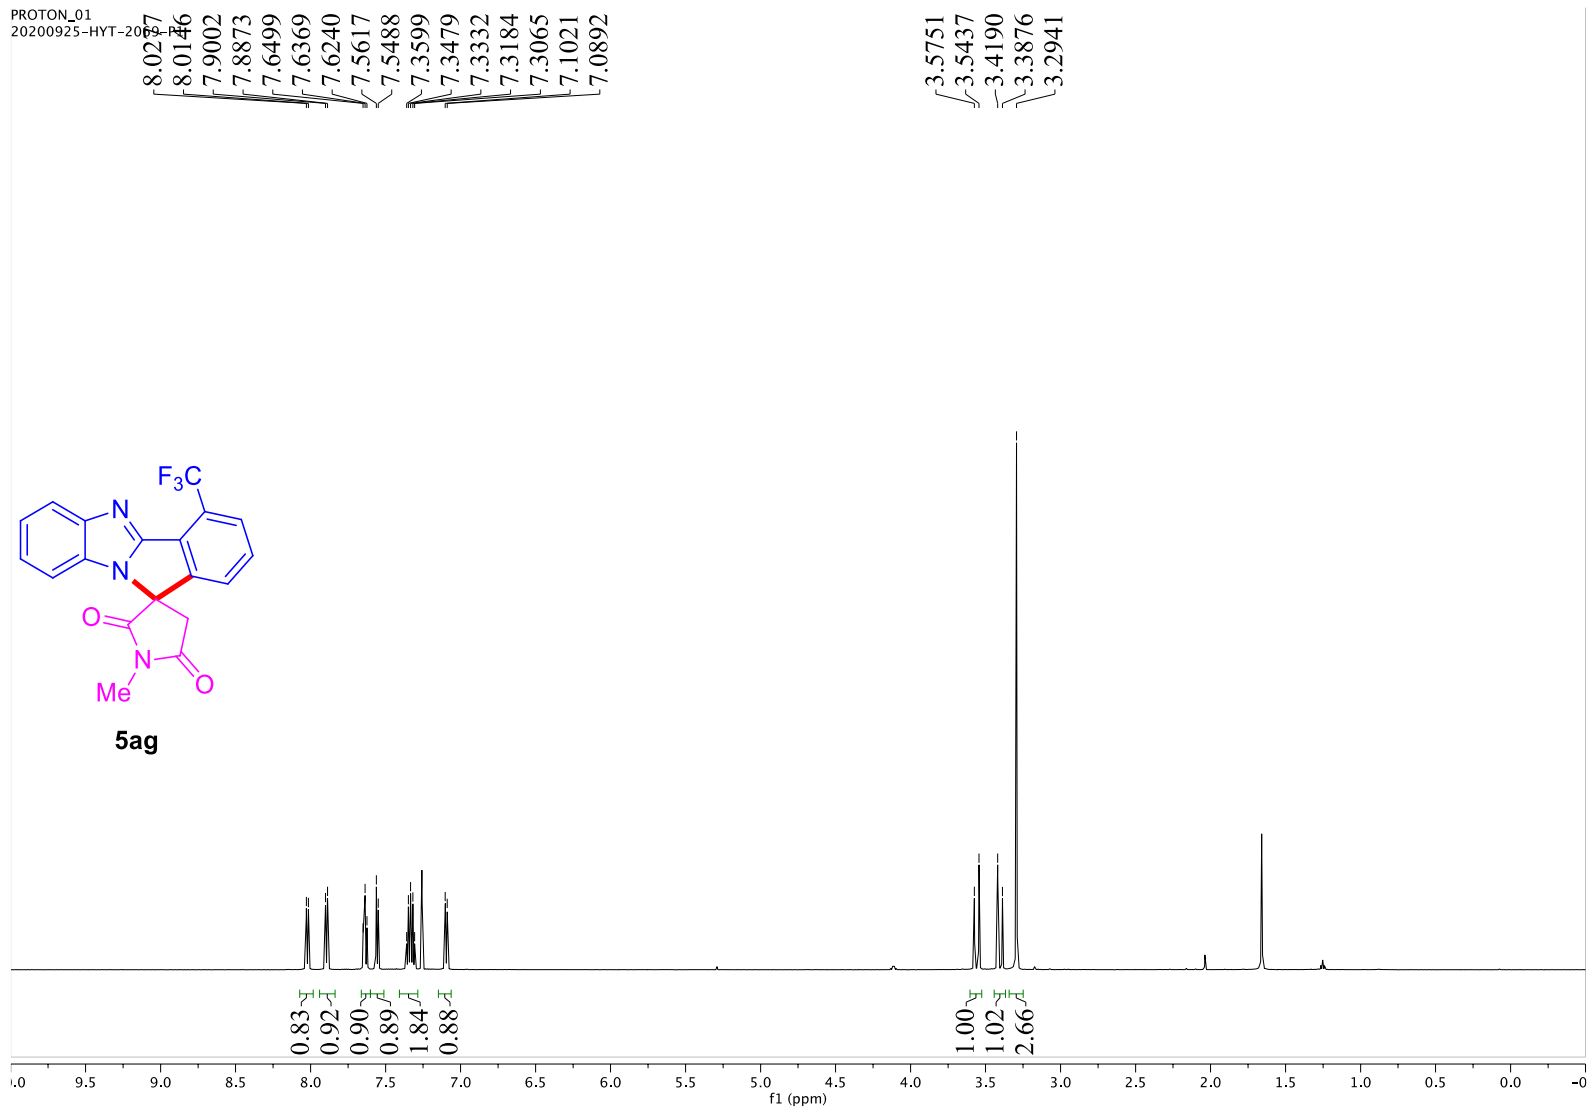

<sup>1</sup>H NMR spectrum (400 MHz) of compound **5ag** in CDCl<sub>3</sub>.

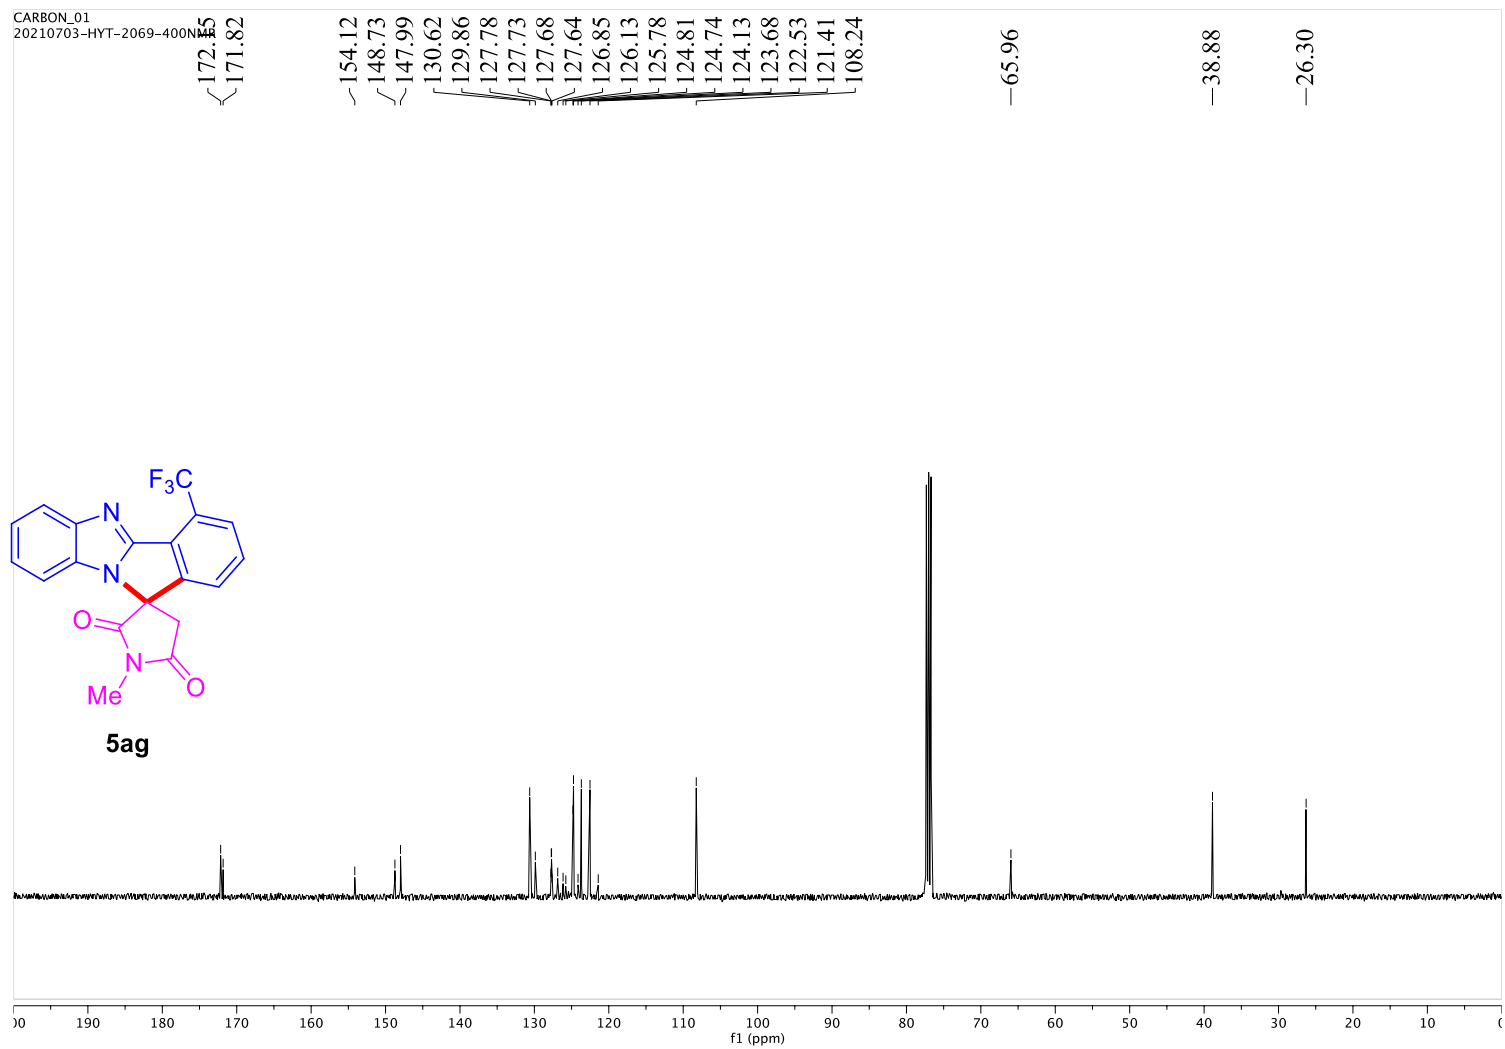

$^{13}\text{C}$  NMR spectrum (100 MHz) of compound **5ag** in  $\text{CDCl}_3$ .

FLUORINE\_01  
20210703-HYT-2069-400NMR

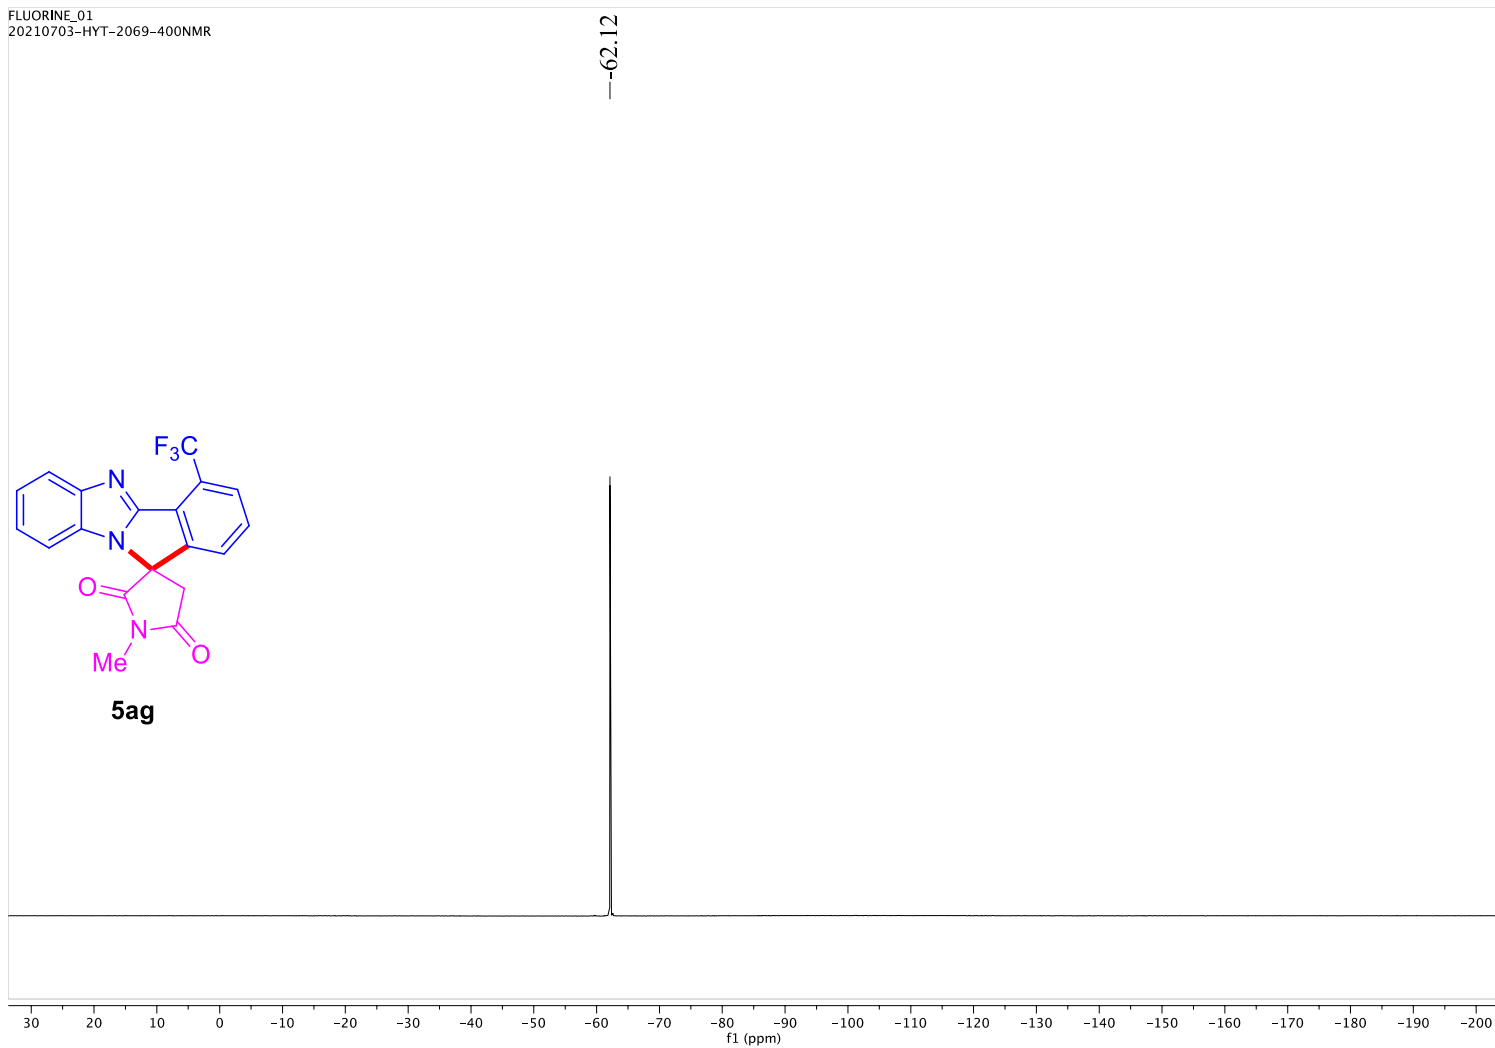

$^{19}F$  NMR spectrum (376 MHz) of compound **5ag** in  $CDCl_3$ .

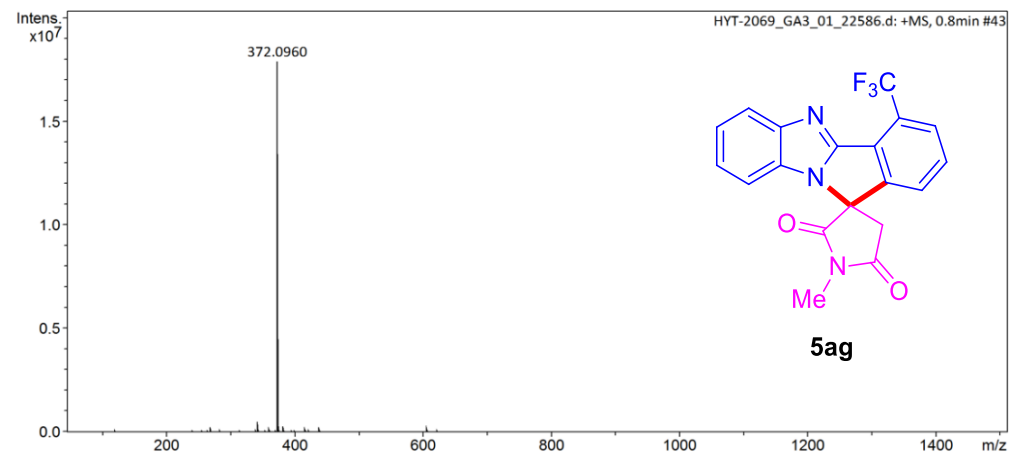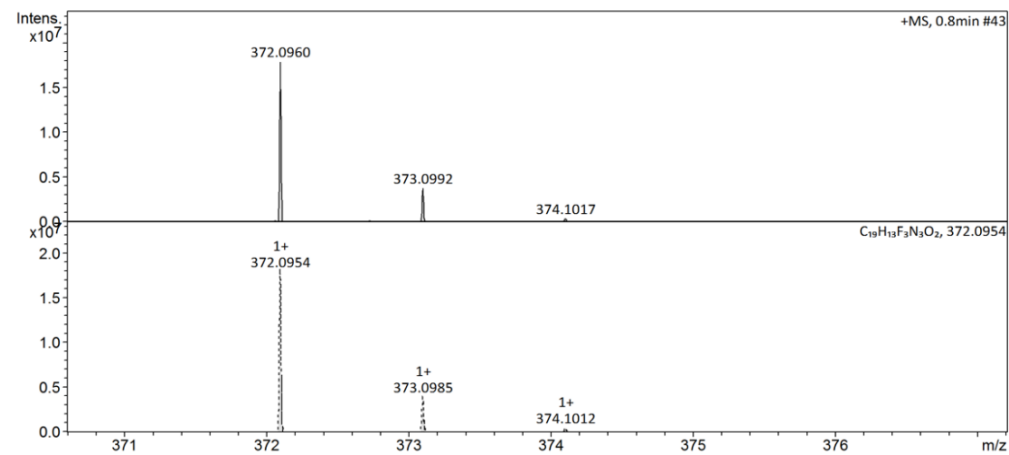

## Display Report

| Meas. m/z | # | Ion Formula                                                                  | m/z      | err [ppm] | mSigma | # Sigma | Score  | rdb  | e <sup>-</sup> Conf | N-Rule | Adduct |
|-----------|---|------------------------------------------------------------------------------|----------|-----------|--------|---------|--------|------|---------------------|--------|--------|
| 372.0960  | 1 | C <sub>19</sub> H <sub>13</sub> F <sub>3</sub> N <sub>3</sub> O <sub>2</sub> | 372.0954 | -1.6      | 5.8    | 1       | 100.00 | 13.5 | even                | ok     | M+H    |

HRMS (ESI) of compound **5ag**.



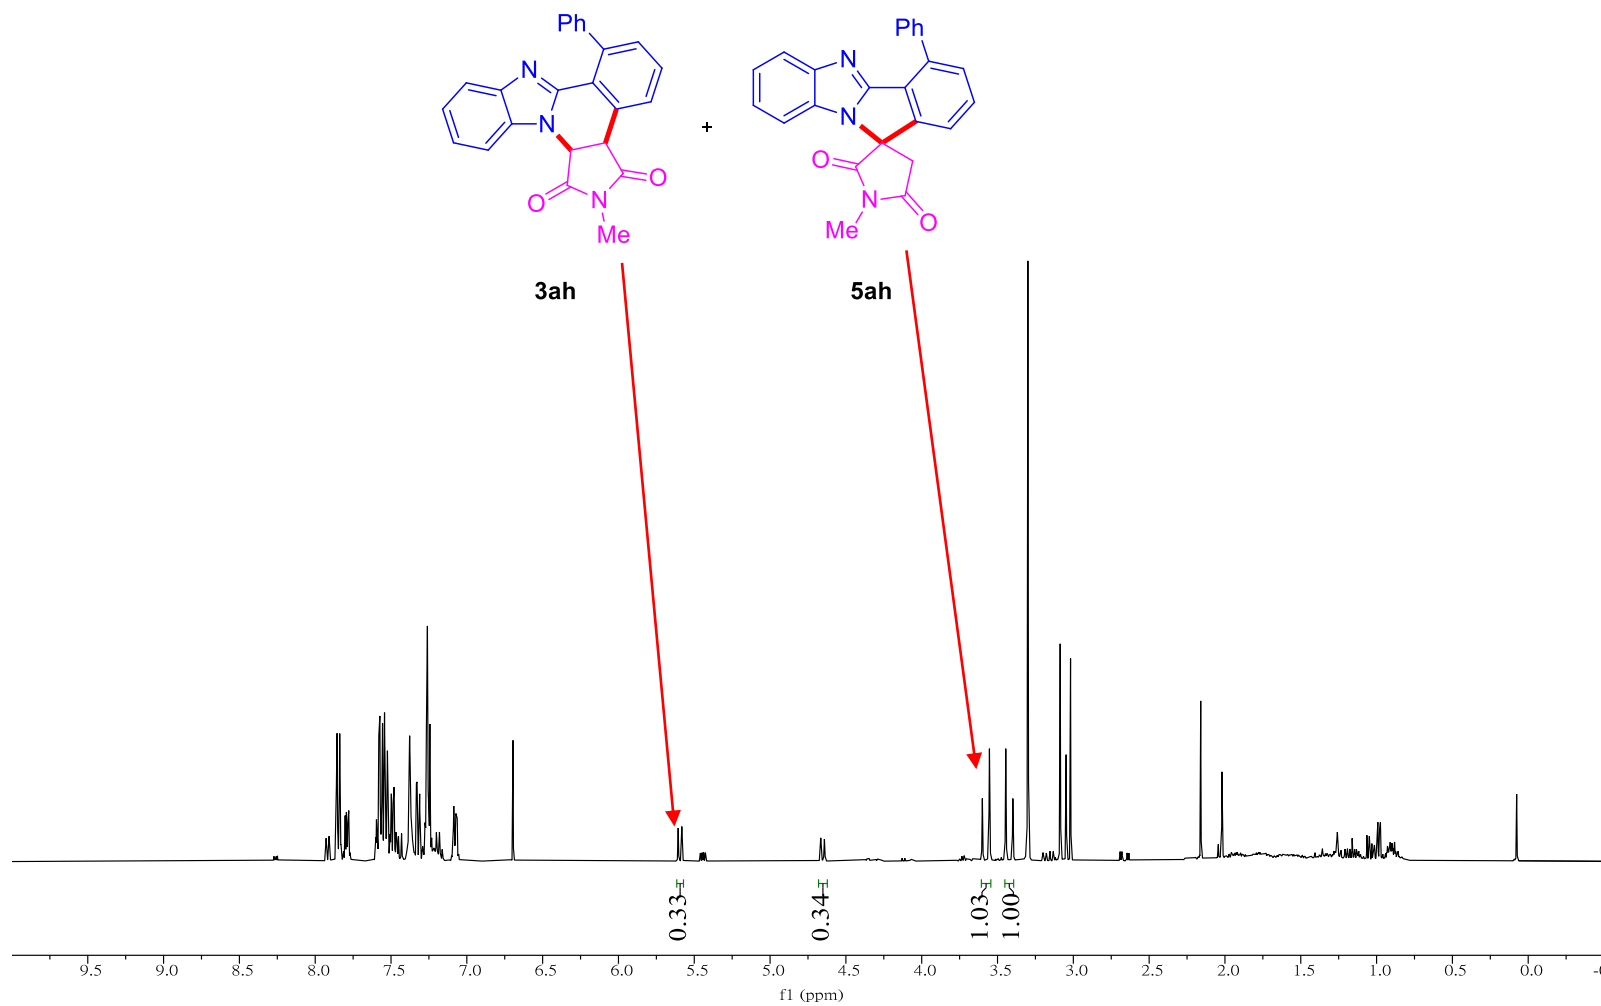

<sup>1</sup>H NMR spectrum (400 MHz) of compound **3ah** and **5ah** in CDCl<sub>3</sub>.

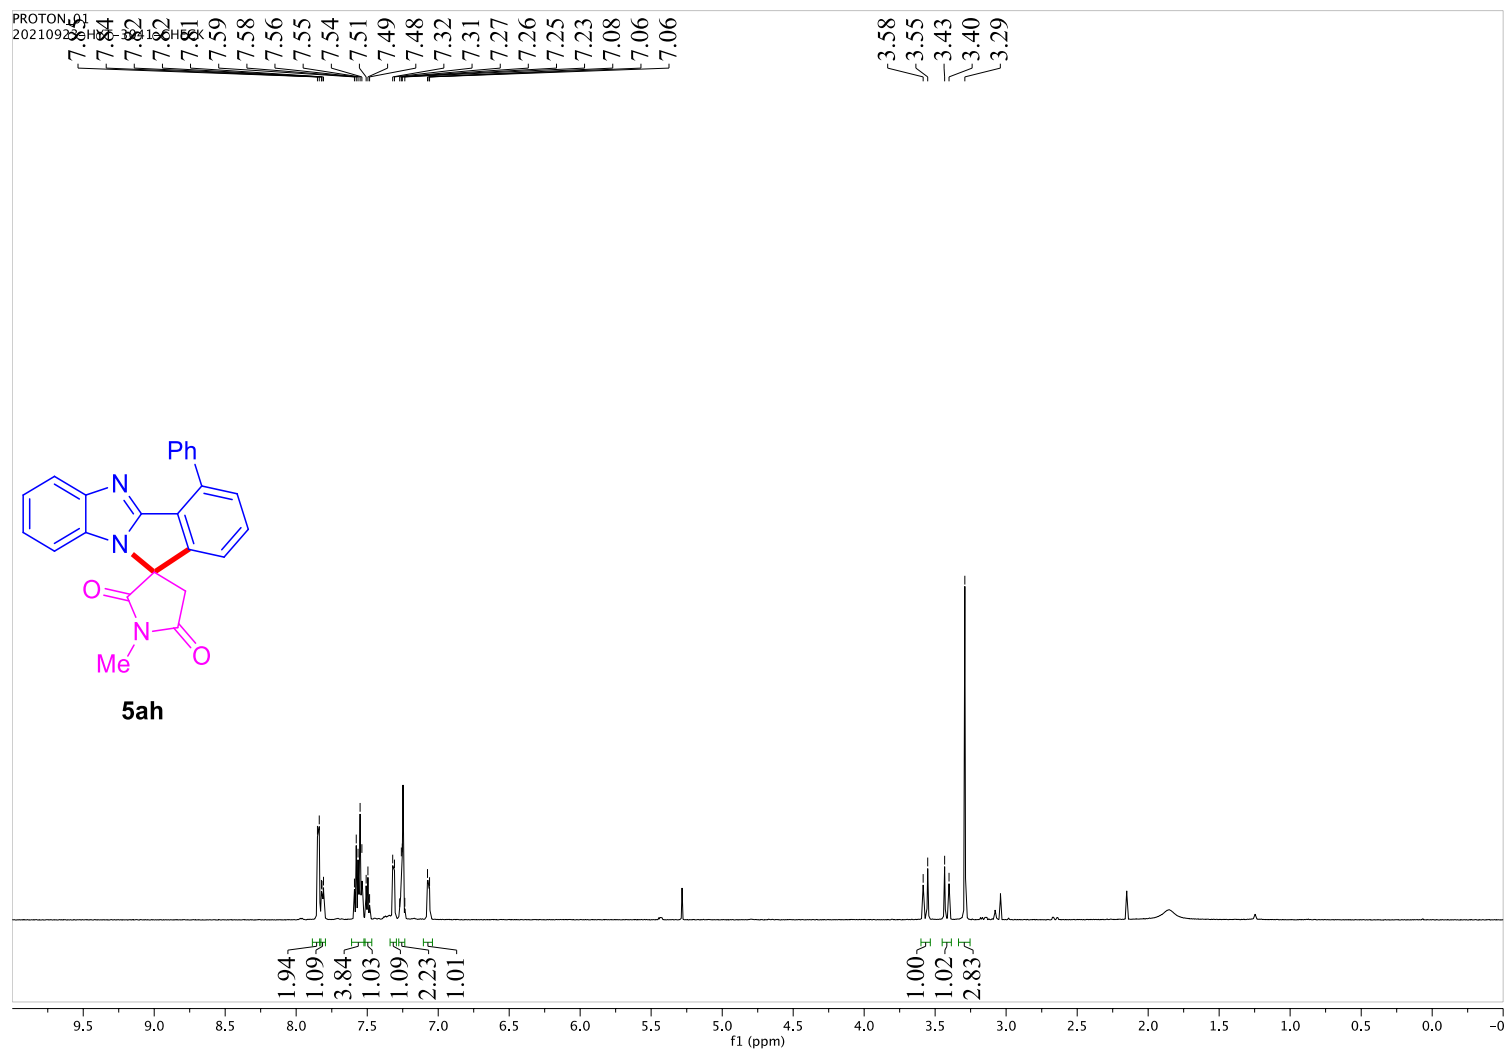

$^1\text{H}$  NMR spectrum (600 MHz) of compound **5ah** in  $\text{CDCl}_3$ .

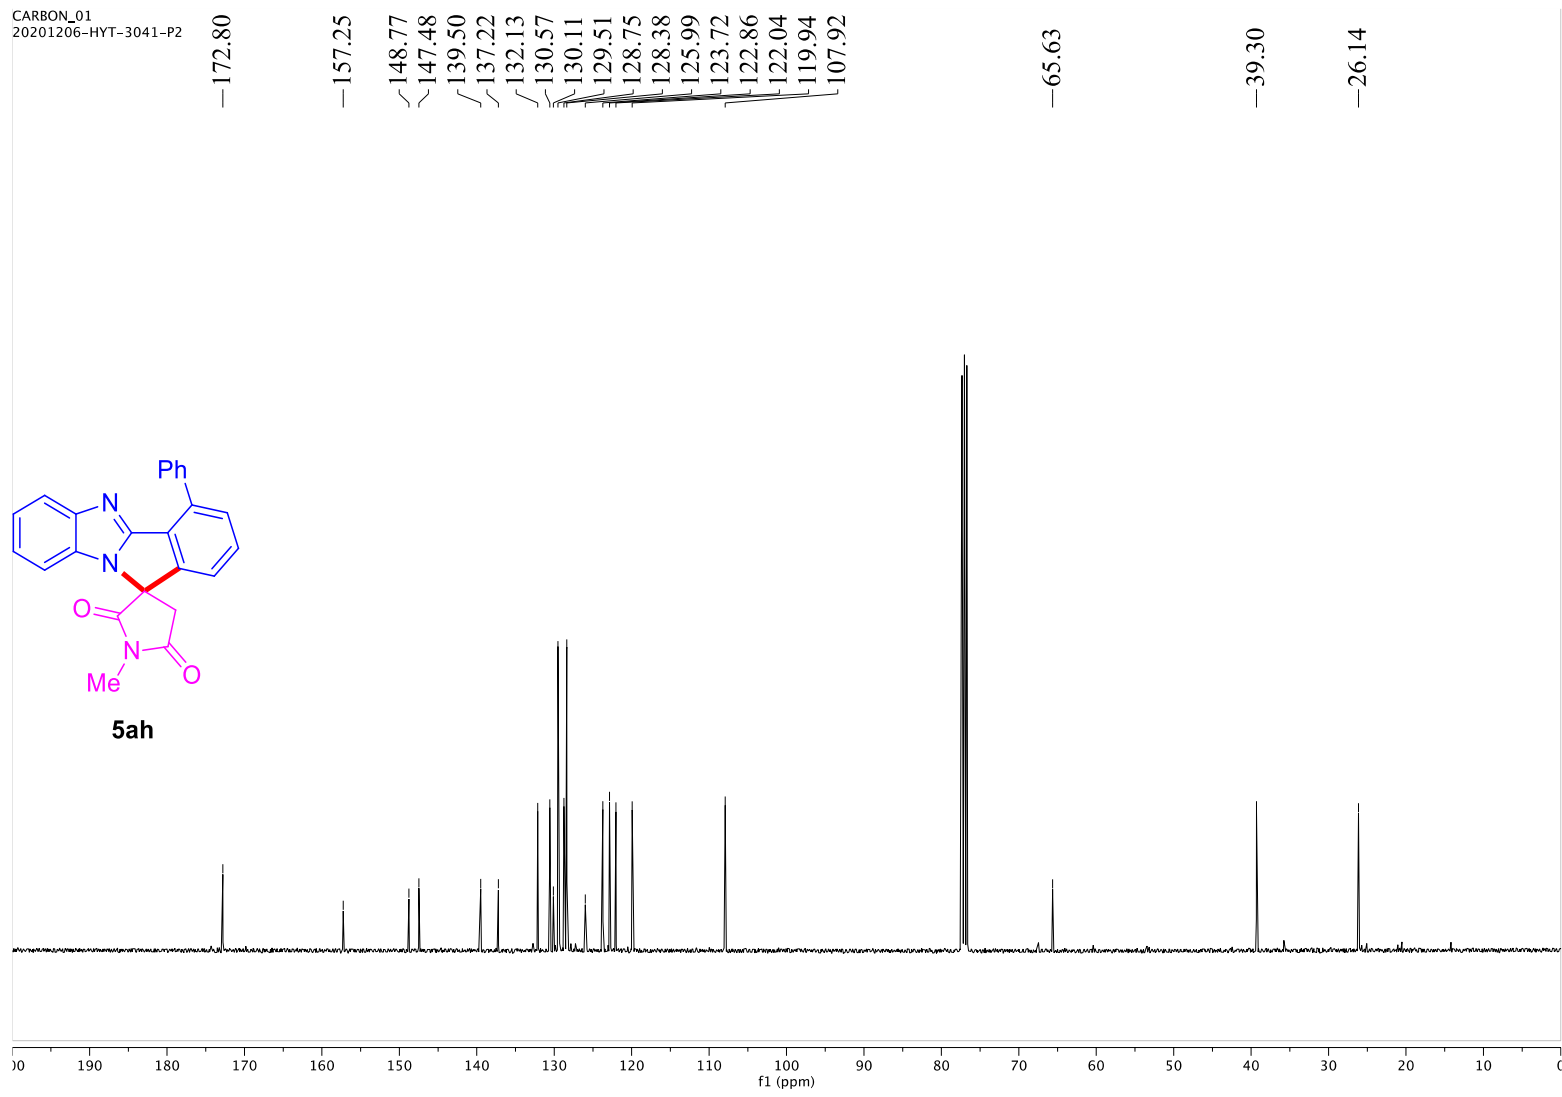

$^{13}\text{C}$  NMR spectrum (100 MHz) of compound **5ah** in  $\text{CDCl}_3$ .

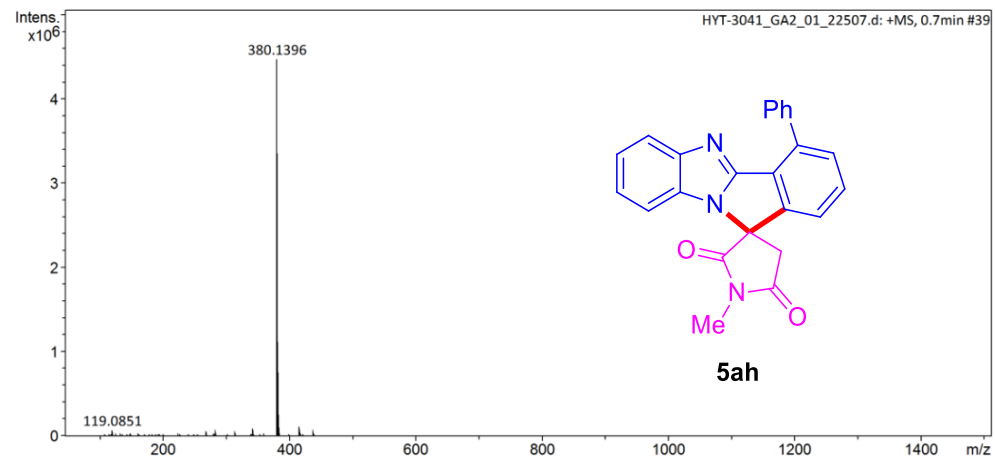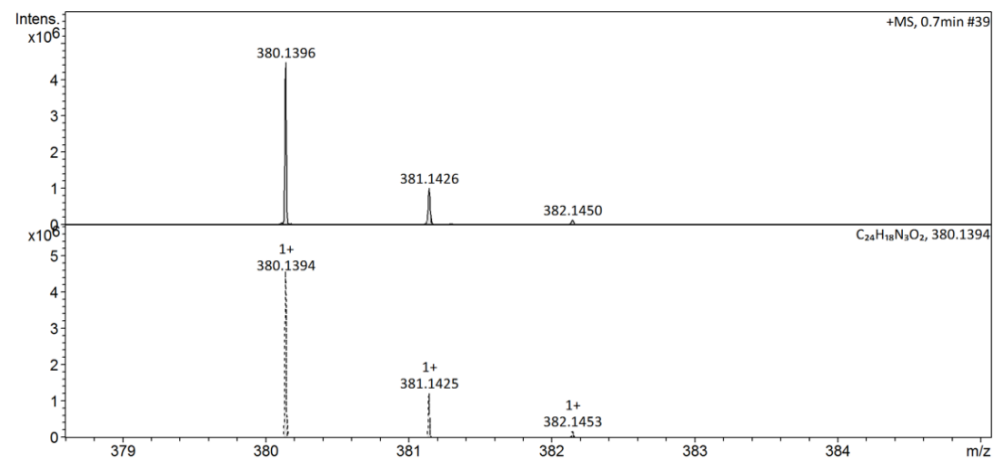

## Display Report

| Meas. m/z | # | Ion Formula                                                   | m/z      | err [ppm] | mSigma | # Sigma | Score  | rdb  | e <sup>-</sup> Conf | N-Rule | Adduct |
|-----------|---|---------------------------------------------------------------|----------|-----------|--------|---------|--------|------|---------------------|--------|--------|
| 380.1396  | 1 | C <sub>24</sub> H <sub>18</sub> N <sub>4</sub> O <sub>2</sub> | 380.1394 | 0.6       | 24.3   | 1       | 100.00 | 17.5 | even                | ok     | M+H    |

HRMS (ESI) of compound **5ah**.

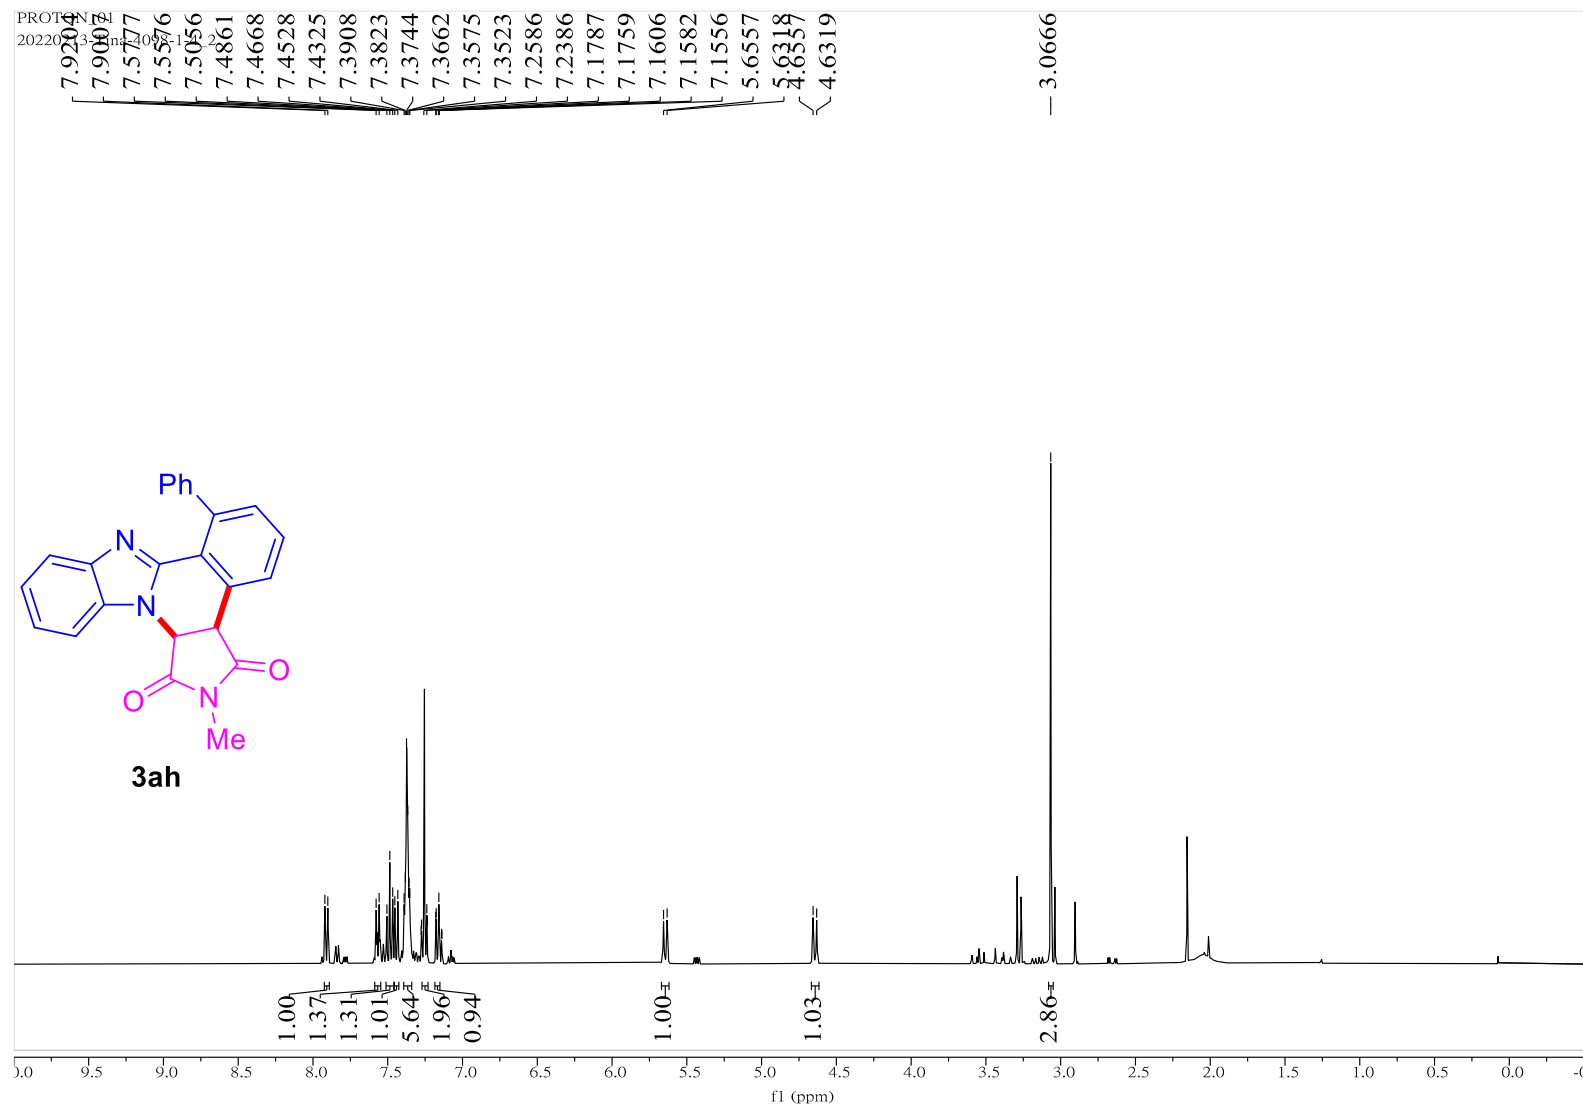

$^1\text{H}$  NMR spectrum (400 MHz) of compound **3ah** in  $\text{CDCl}_3$ .

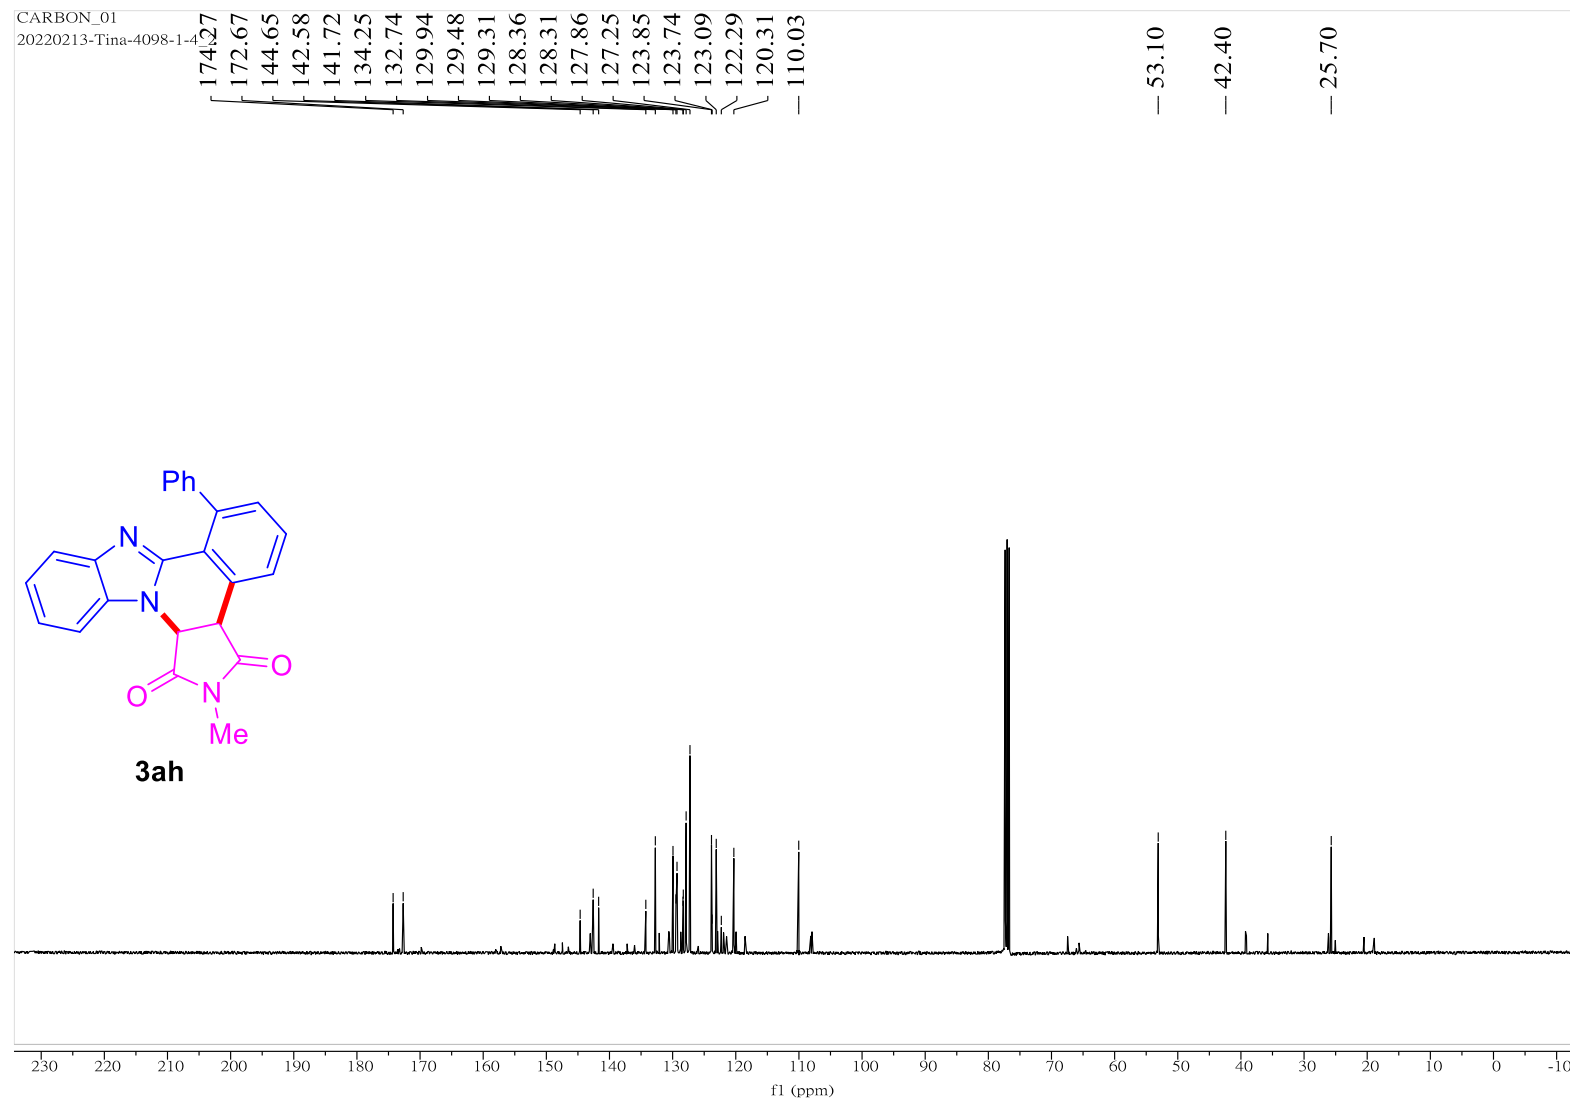

$^{13}\text{C}$  NMR spectrum (100 MHz) of compound **3ah** in  $\text{CDCl}_3$ .

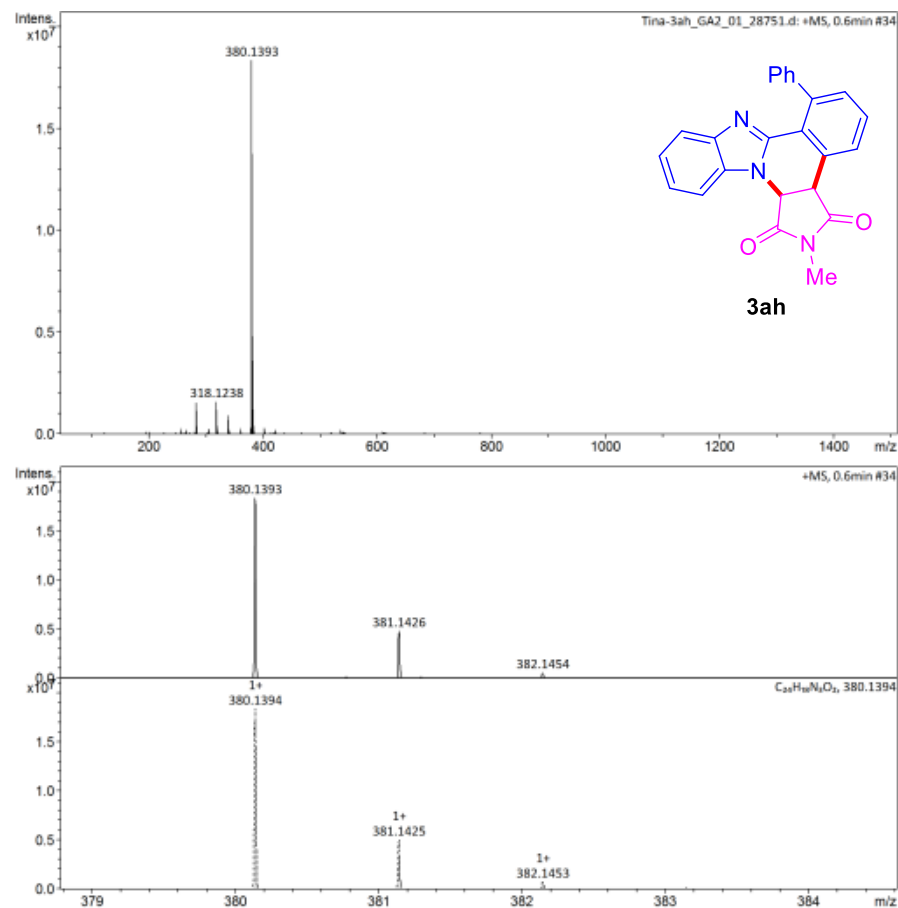

## Display Report

| Meas. m/z | # | Ion Formula                                                   | m/z      | err [ppm] | mSigma | # Sigma | Score  | rdb  | e <sup>-</sup> Conf | N-Rule | Adduct |
|-----------|---|---------------------------------------------------------------|----------|-----------|--------|---------|--------|------|---------------------|--------|--------|
| 380.1393  | 1 | C <sub>24</sub> H <sub>18</sub> N <sub>3</sub> O <sub>2</sub> | 380.1394 | -0.1      | 7.8    | 1       | 100.00 | 17.5 | even                | ok     | M+H    |

HRMS (ESI) of compound **3ah**.

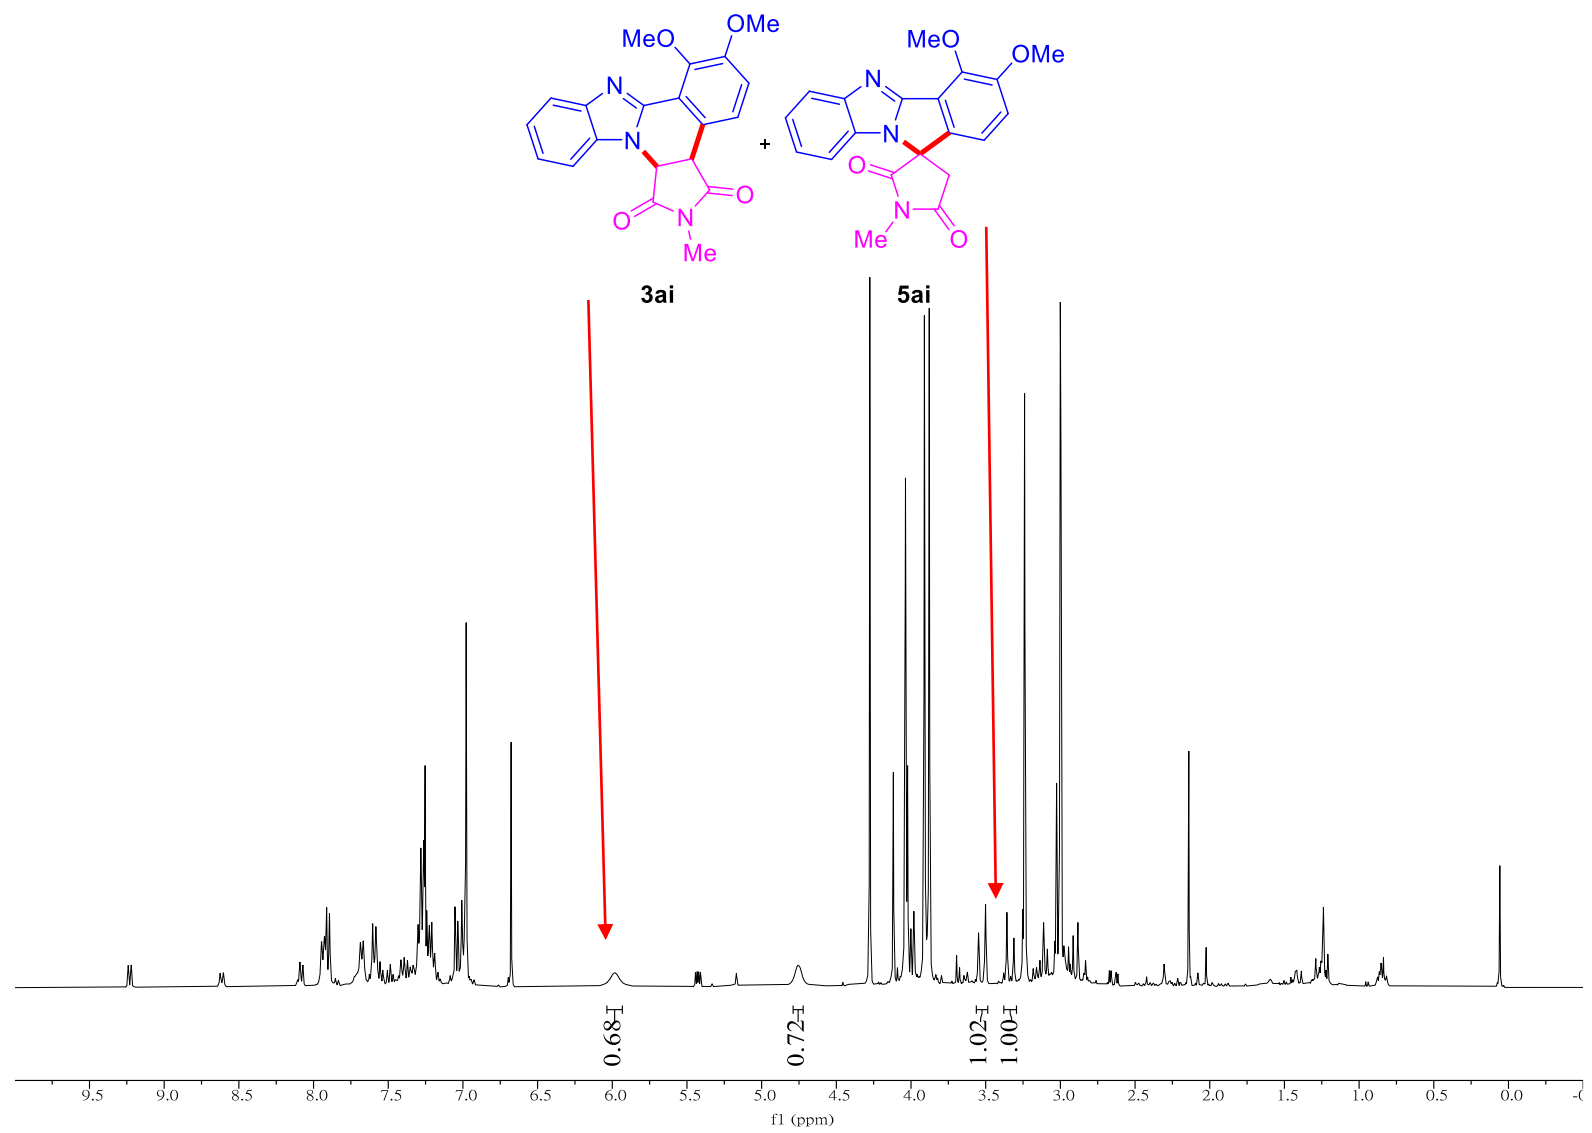

<sup>1</sup>H NMR spectrum (400 MHz) of compound **3ai** and **5ai** in CDCl<sub>3</sub>.



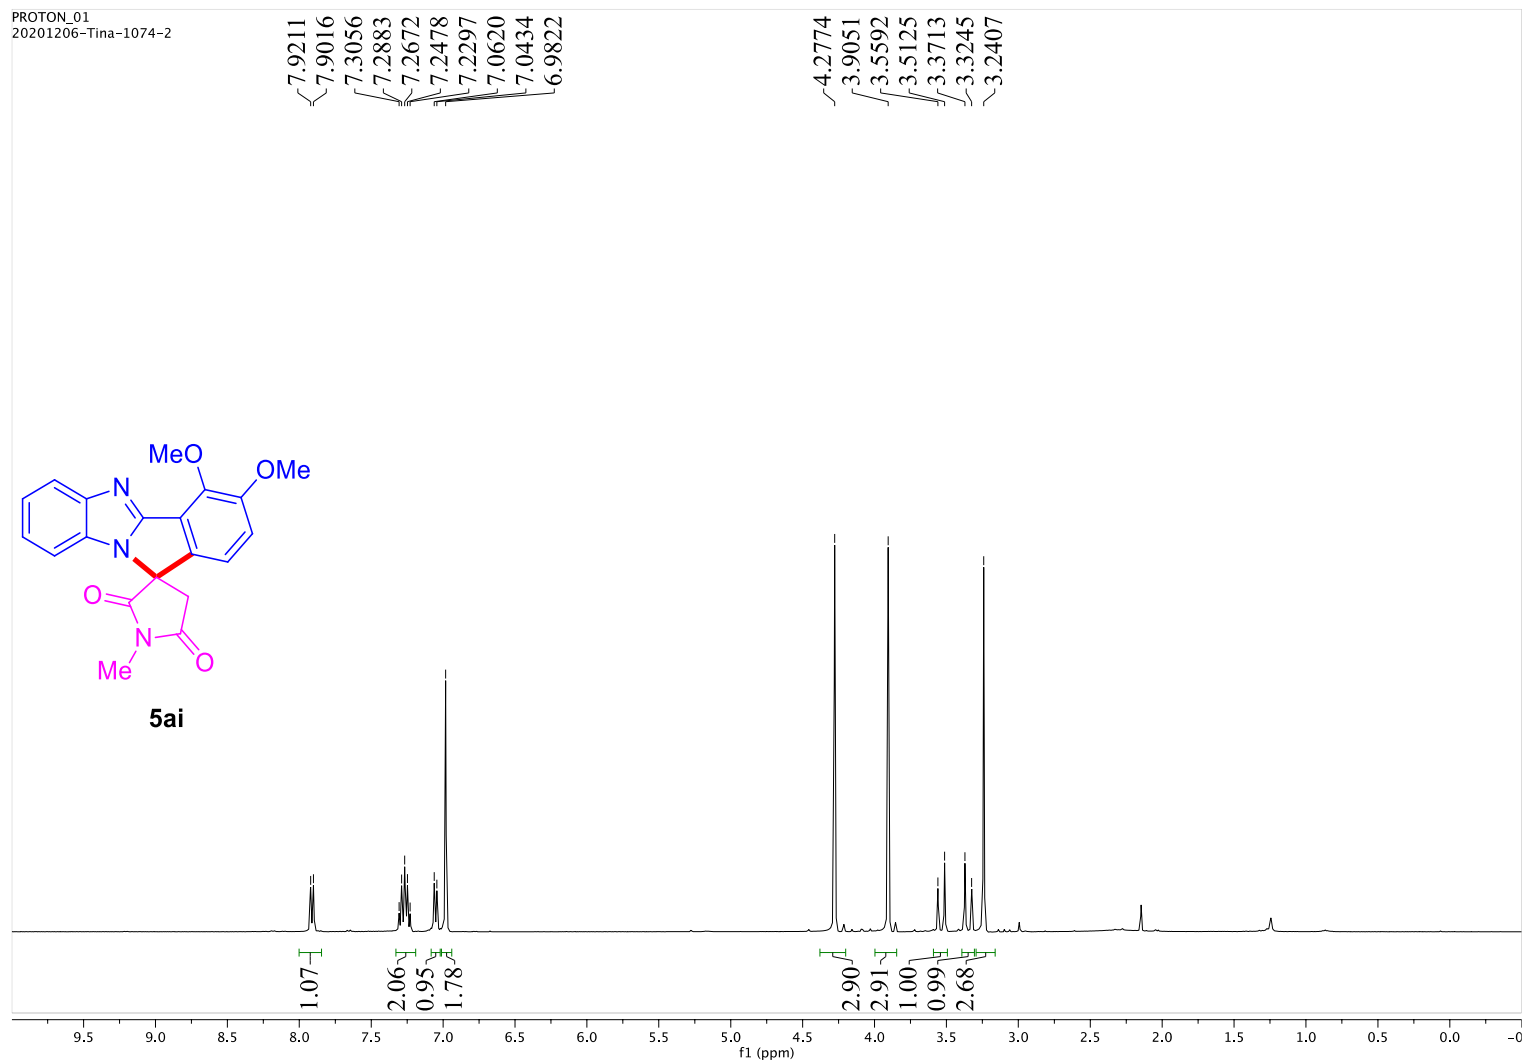

$^1\text{H}$  NMR spectrum (400 MHz) of compound **5ai** in  $\text{CDCl}_3$ .

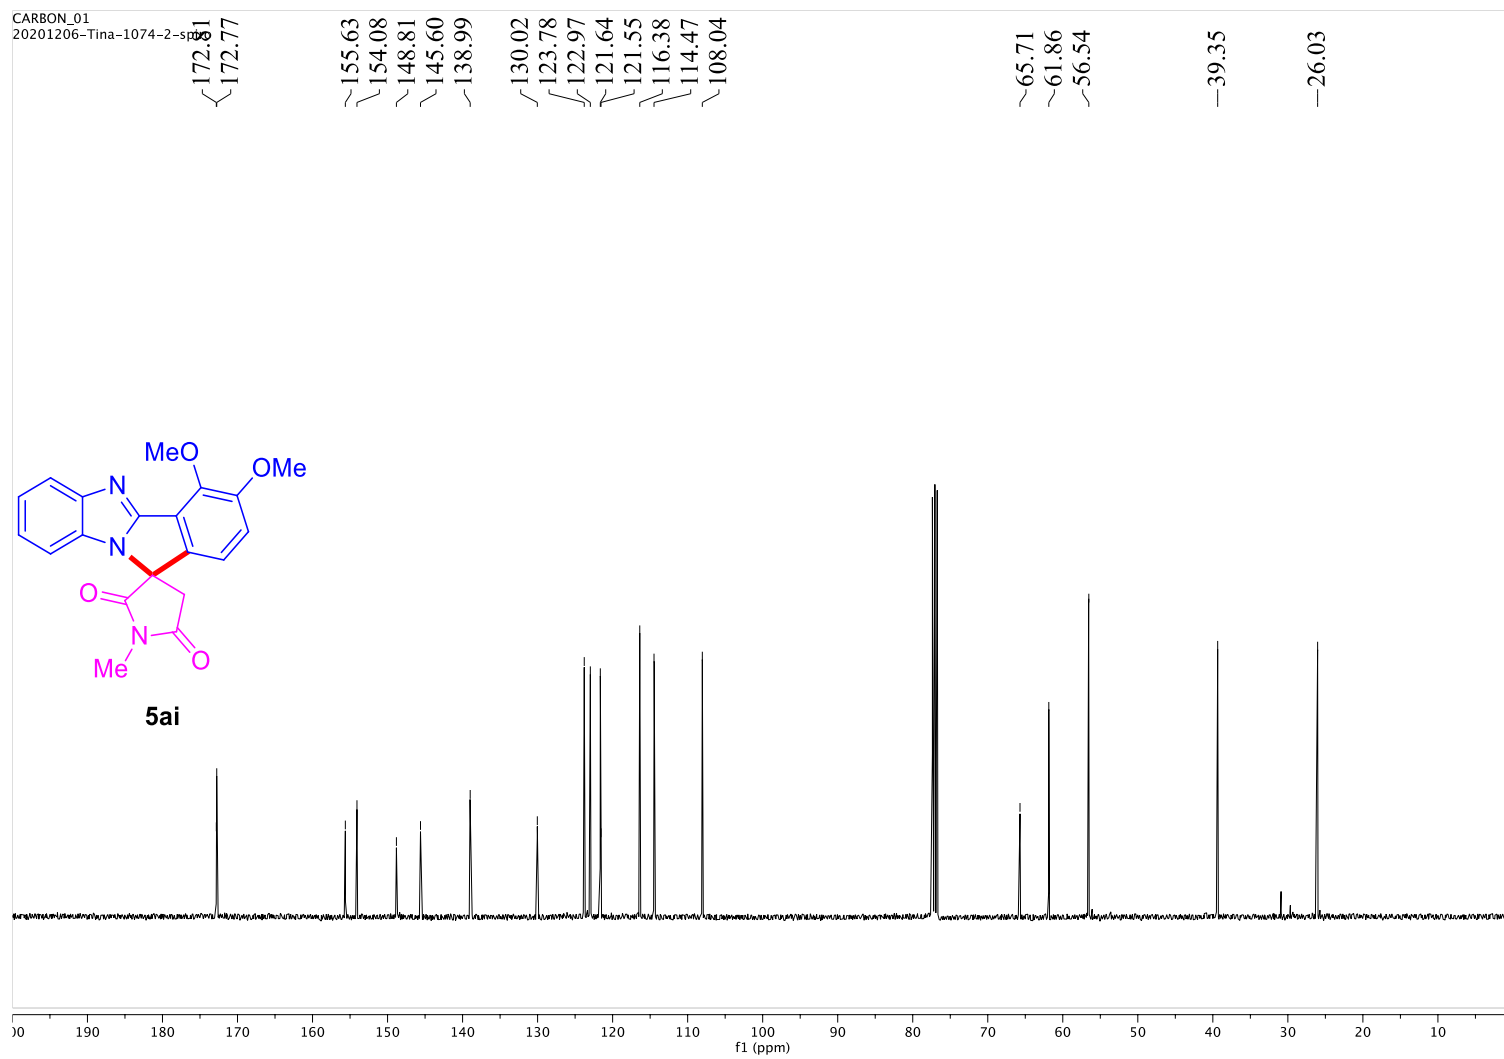

$^{13}\text{C}$  NMR spectrum (100 MHz) of compound **5ai** in  $\text{CDCl}_3$ .

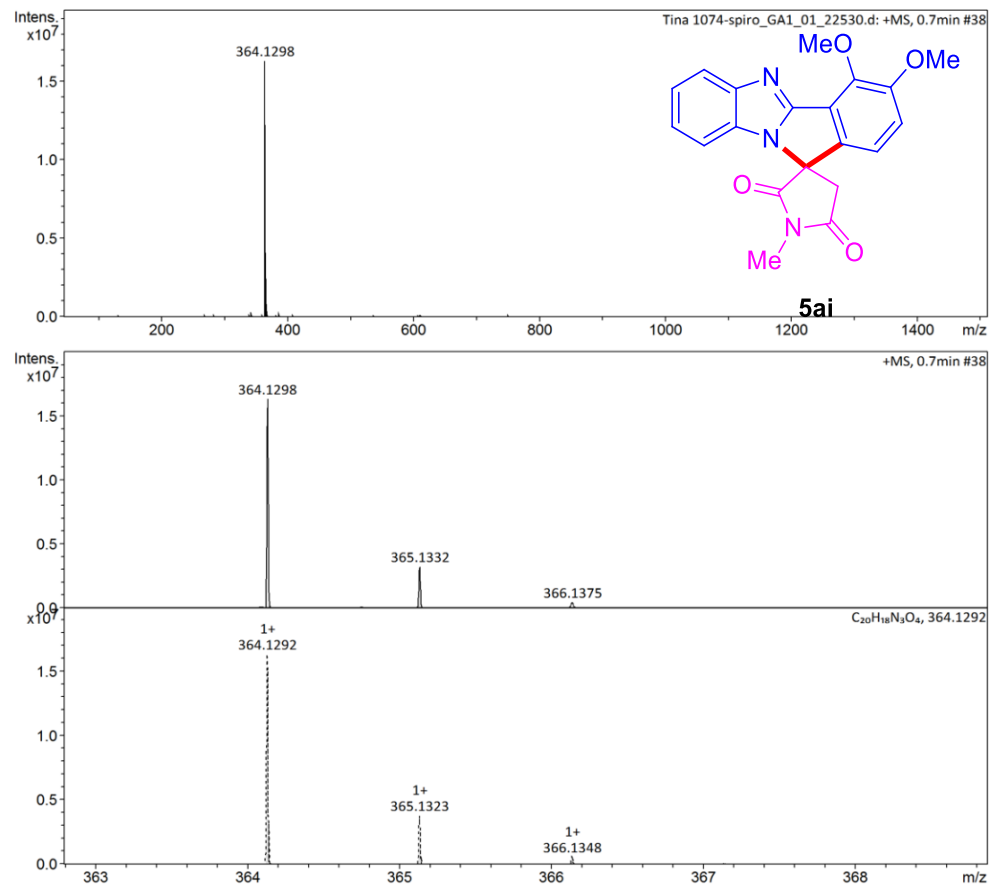

## Display Report

| Meas. m/z | # | Ion Formula                                                   | m/z      | err [ppm] | mSigma | # Sigma | Score  | rdb  | e <sup>-</sup> Conf | N-Rule | Adduct |
|-----------|---|---------------------------------------------------------------|----------|-----------|--------|---------|--------|------|---------------------|--------|--------|
| 364.1298  | 1 | C <sub>20</sub> H <sub>18</sub> N <sub>2</sub> O <sub>4</sub> | 364.1292 | -1.8      | 16.0   | 1       | 100.00 | 13.5 | even                | ok     | M+H    |

HRMS (ESI) of compound **5ai**.

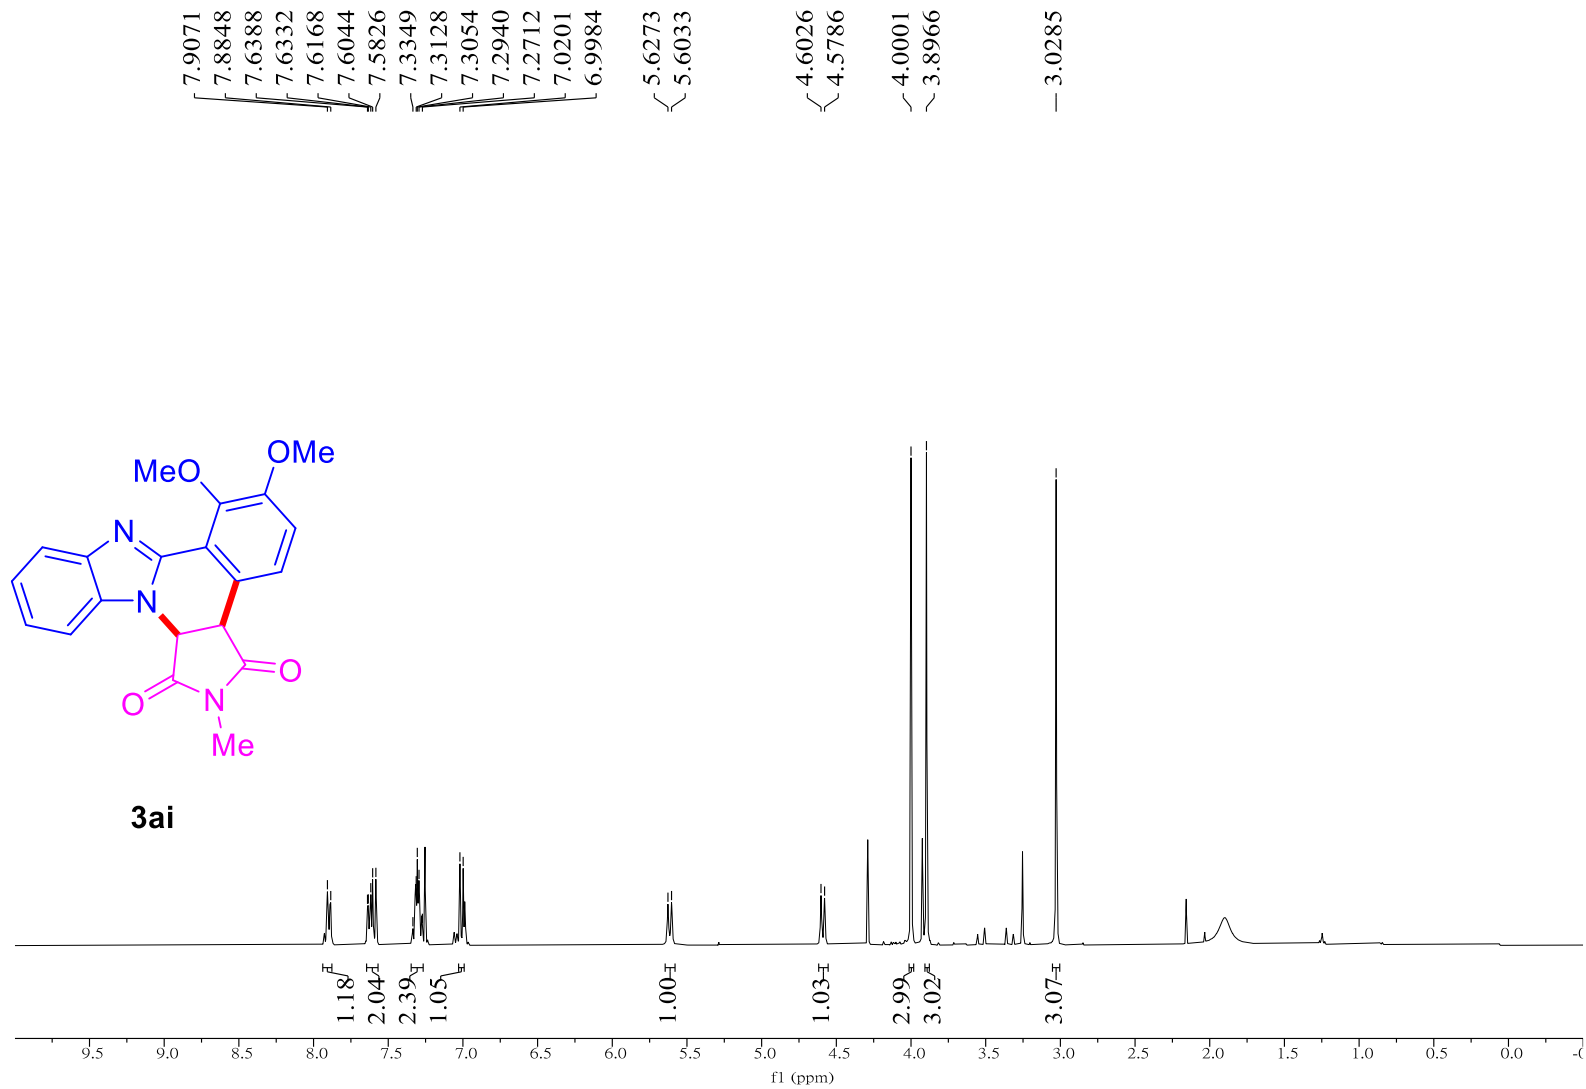

<sup>1</sup>H NMR spectrum (400 MHz) of compound **3ai** in CDCl<sub>3</sub>.

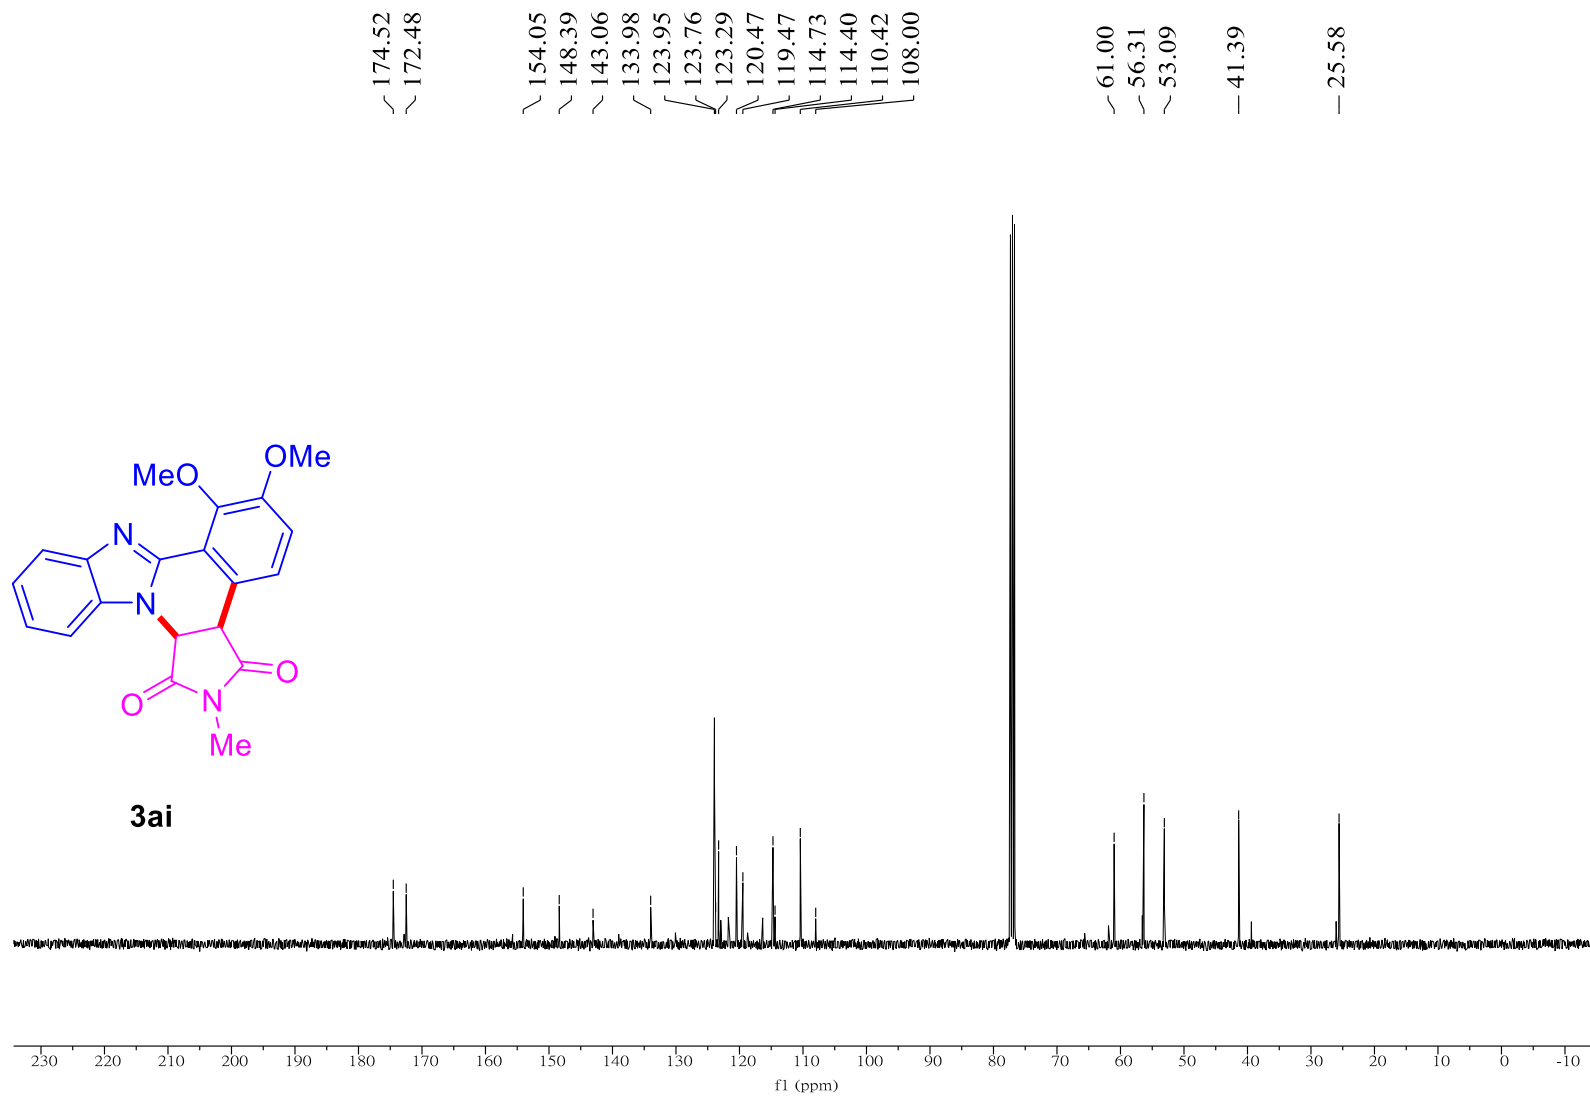

$^{13}\text{C}$  NMR spectrum (100 MHz) of compound **3ai** in  $\text{CDCl}_3$ .

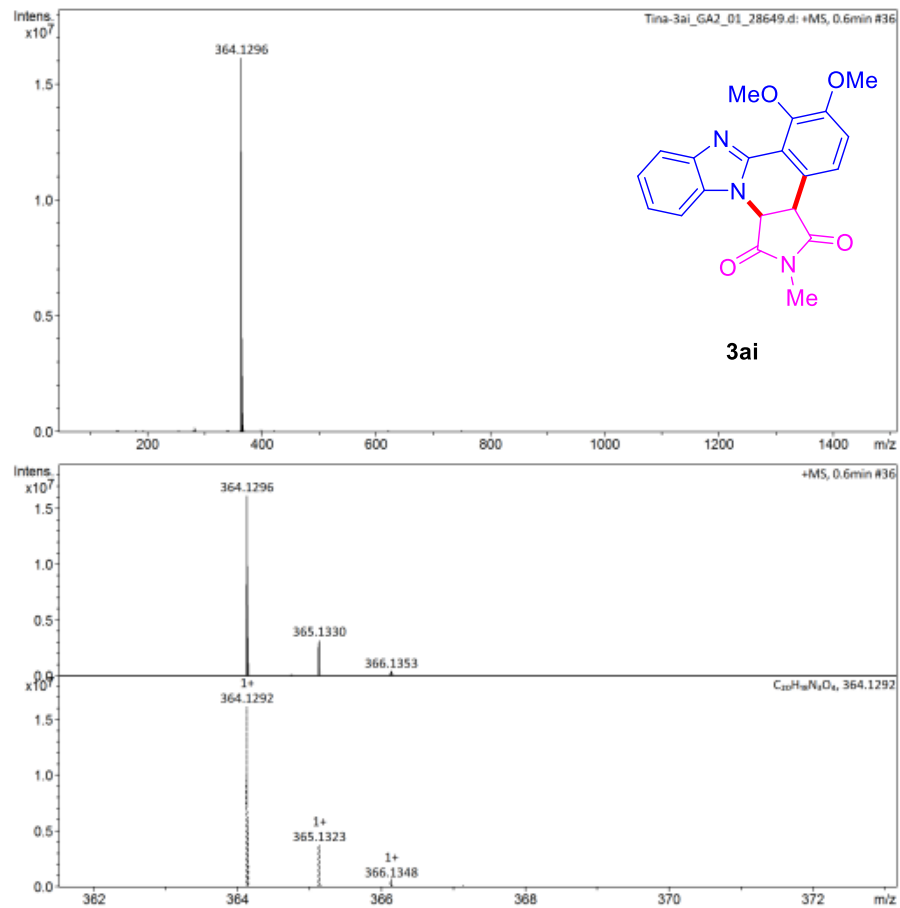

### Display Report

| Meas. m/z | # | Ion Formula                                                   | m/z      | err [ppm] | mSigma | # Sigma | Score  | rdb  | e <sup>-</sup> Conf | N-Rule | Adduct |
|-----------|---|---------------------------------------------------------------|----------|-----------|--------|---------|--------|------|---------------------|--------|--------|
| 364.1296  | 1 | C <sub>20</sub> H <sub>18</sub> N <sub>3</sub> O <sub>4</sub> | 364.1292 | 1.2       | 16.3   | 1       | 100.00 | 13.5 | even                | ok     | M+H    |

HRMS (ESI) of compound **3ai**.

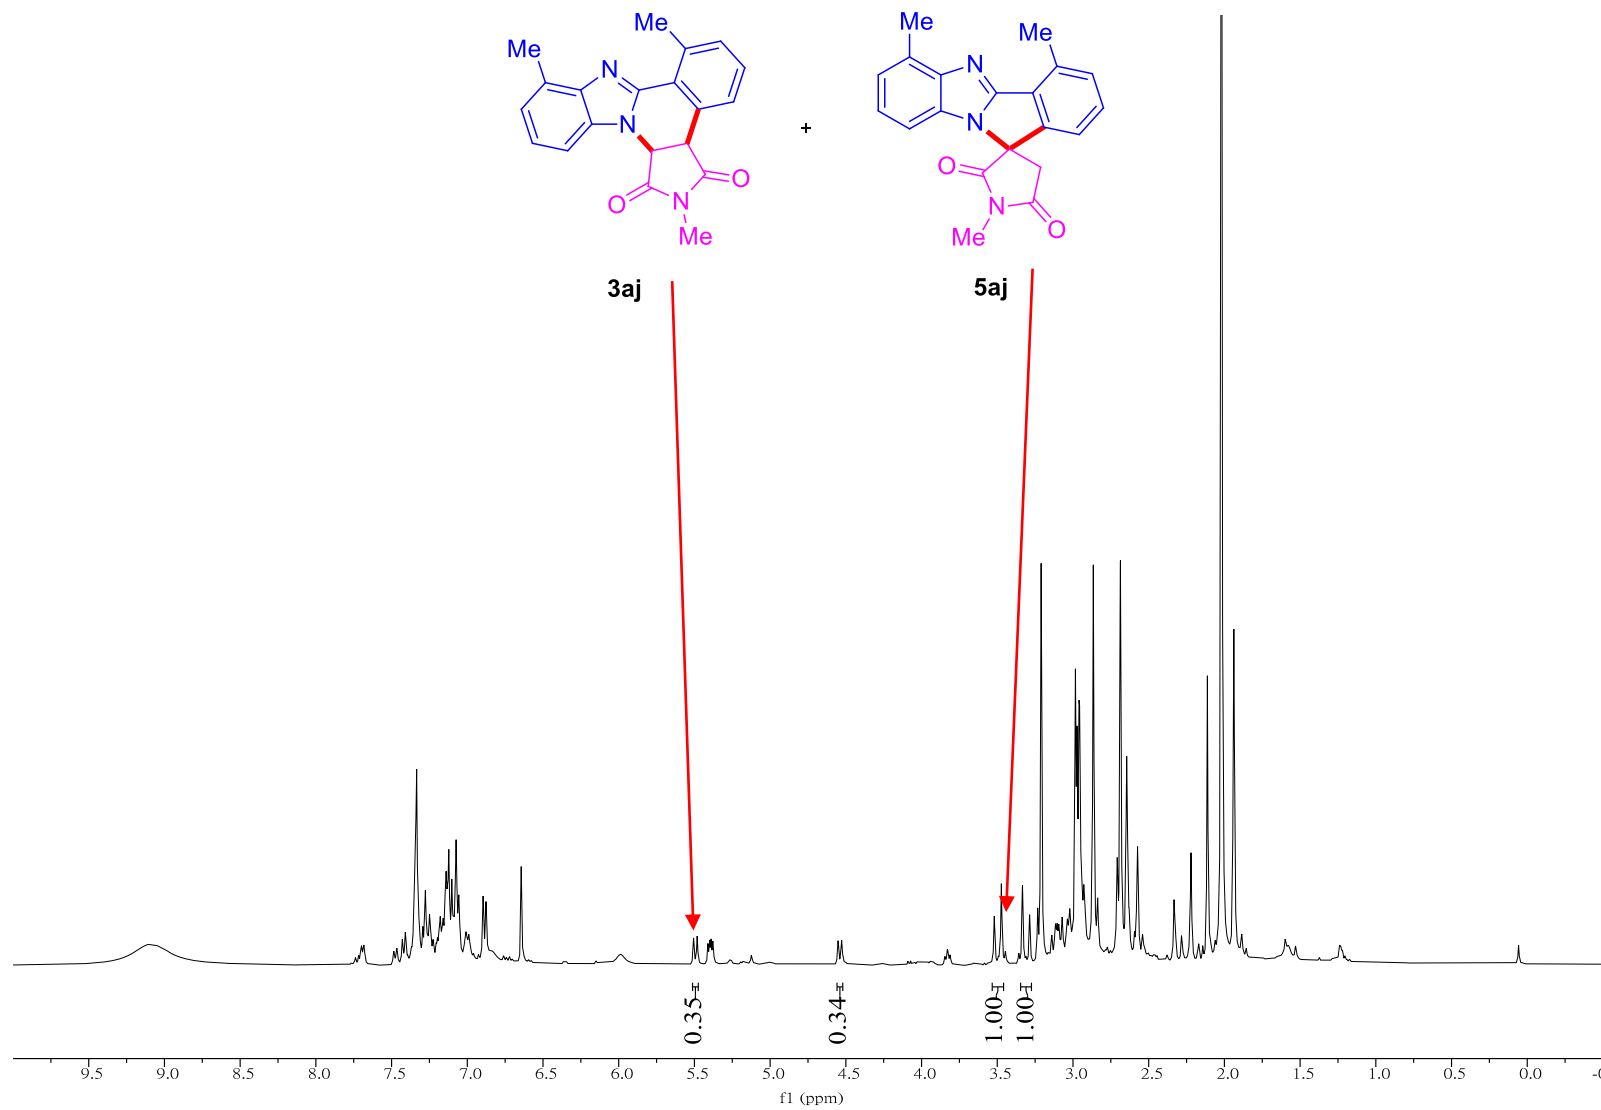

$^1\text{H}$  NMR spectrum (400 MHz) of compound **3aj** and **5aj** in  $\text{CDCl}_3$ .

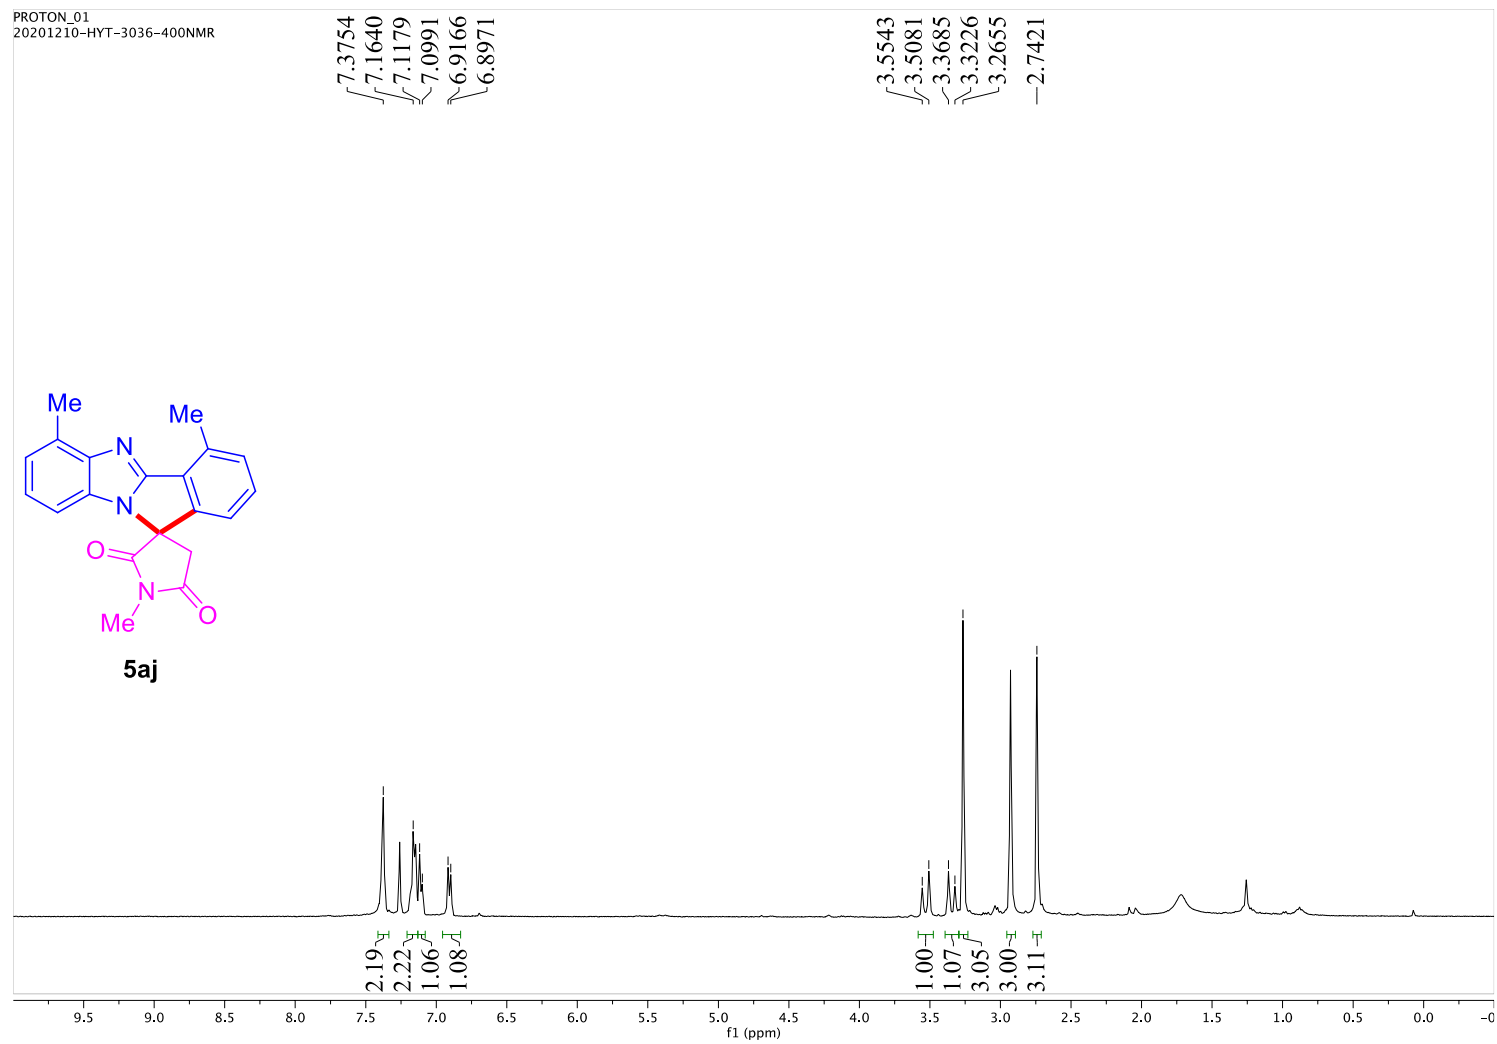

$^1\text{H}$  NMR spectrum (400 MHz) of compound **5aj** in  $\text{CDCl}_3$ .



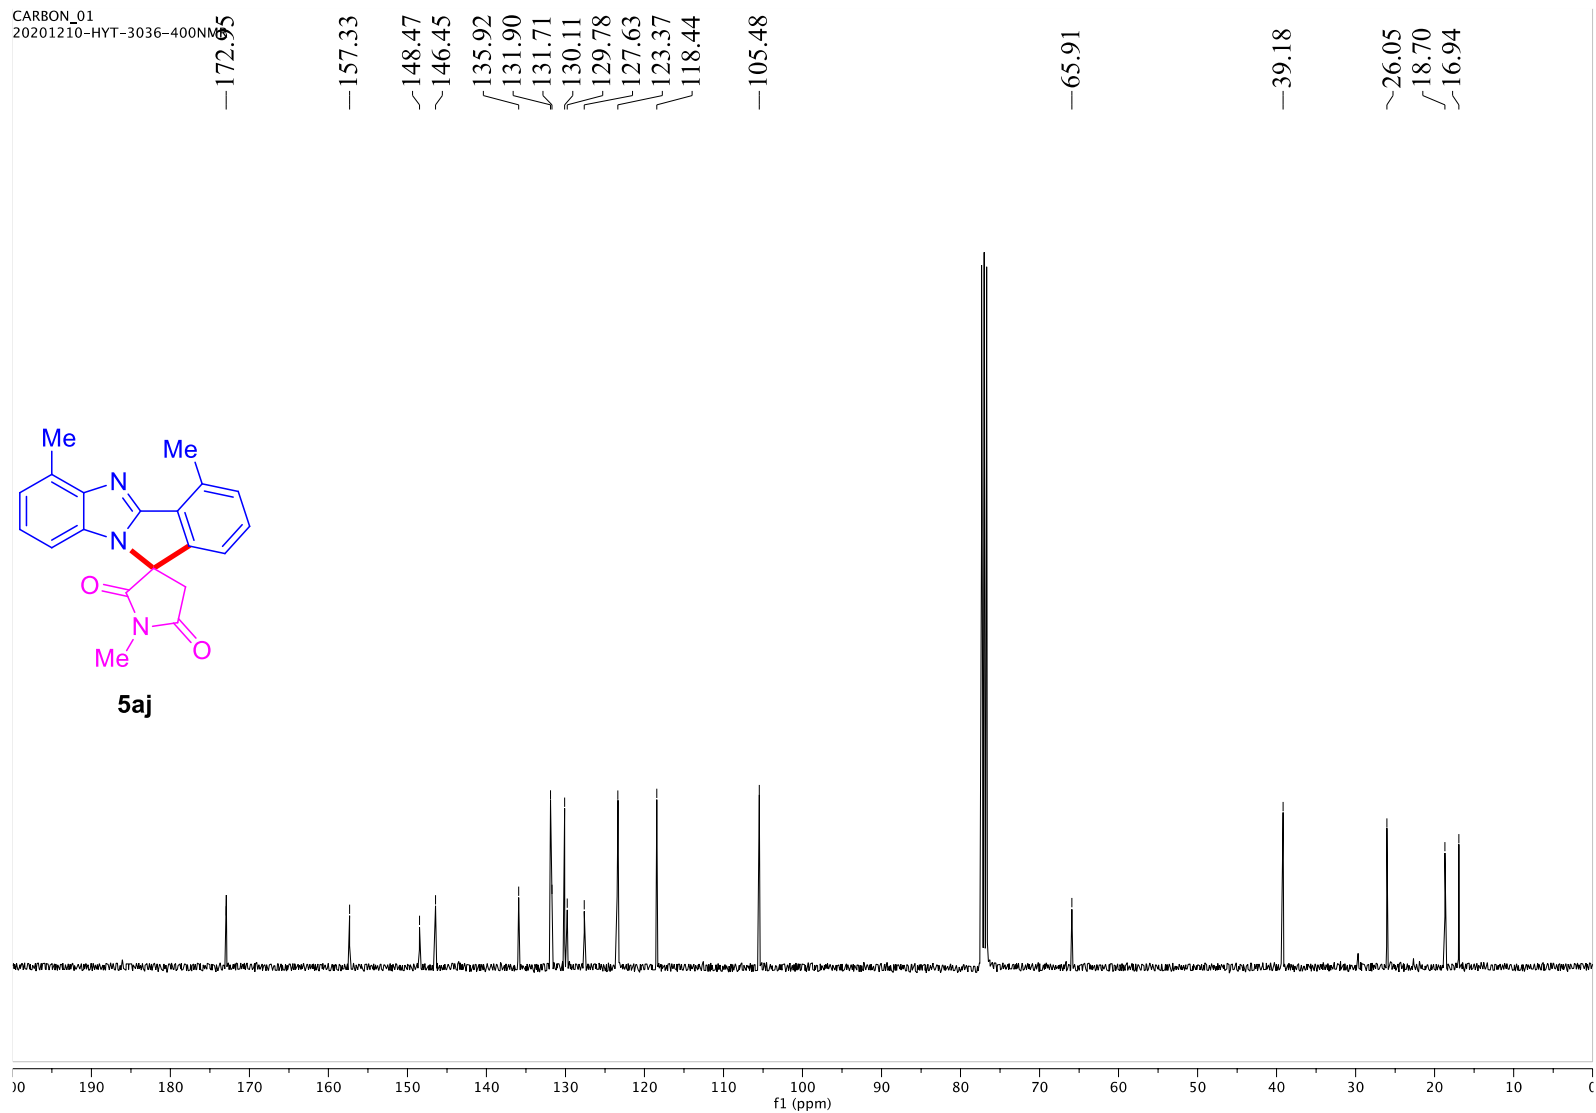

$^{13}\text{C}$  NMR spectrum (100 MHz) of compound **5aj** in  $\text{CDCl}_3$ .

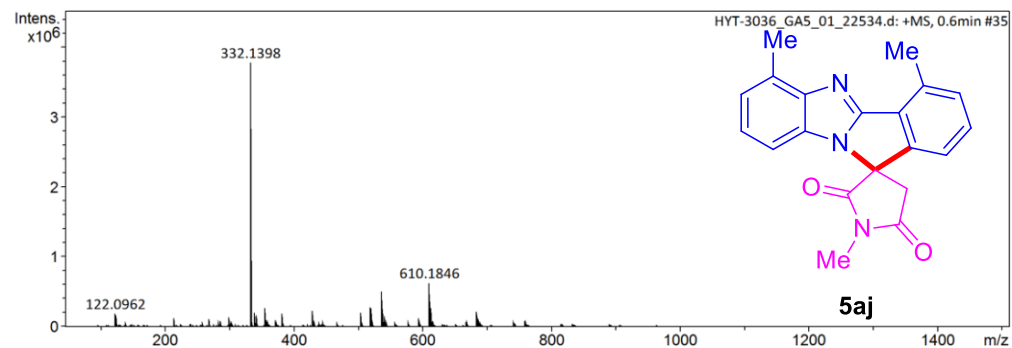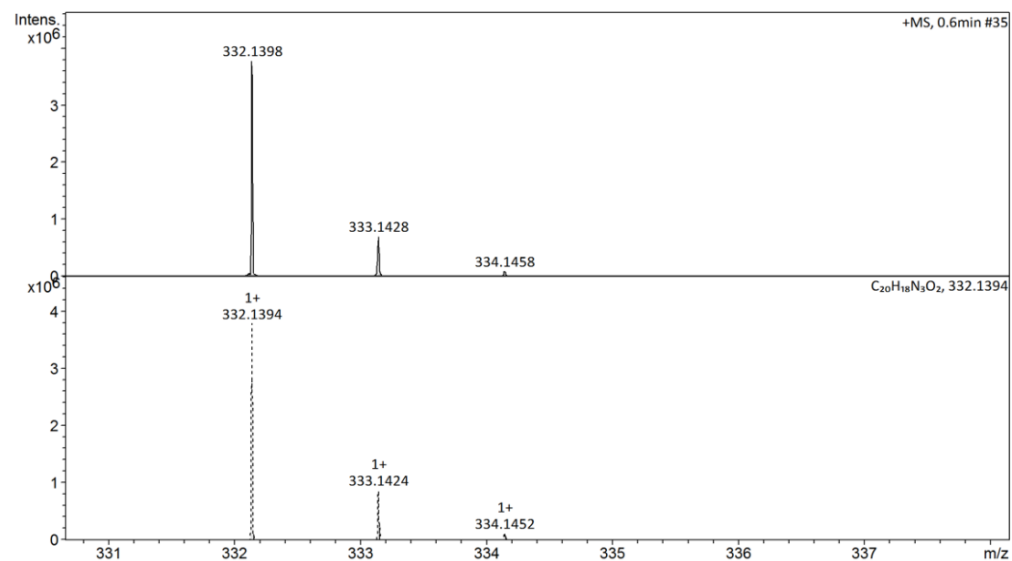

## Display Report

| Meas. m/z | # | Ion Formula                                                   | m/z      | err [ppm] | mSigma | # Sigma | Score  | rdb  | e <sup>-</sup> Conf | N-Rule | Adduct |
|-----------|---|---------------------------------------------------------------|----------|-----------|--------|---------|--------|------|---------------------|--------|--------|
| 332.1399  | 1 | C <sub>20</sub> H <sub>18</sub> N <sub>3</sub> O <sub>2</sub> | 332.1394 | -1.6      | 26.6   | 1       | 100.00 | 13.5 | even                | ok     | M+H    |

HRMS (ESI) of compound **5aj**.

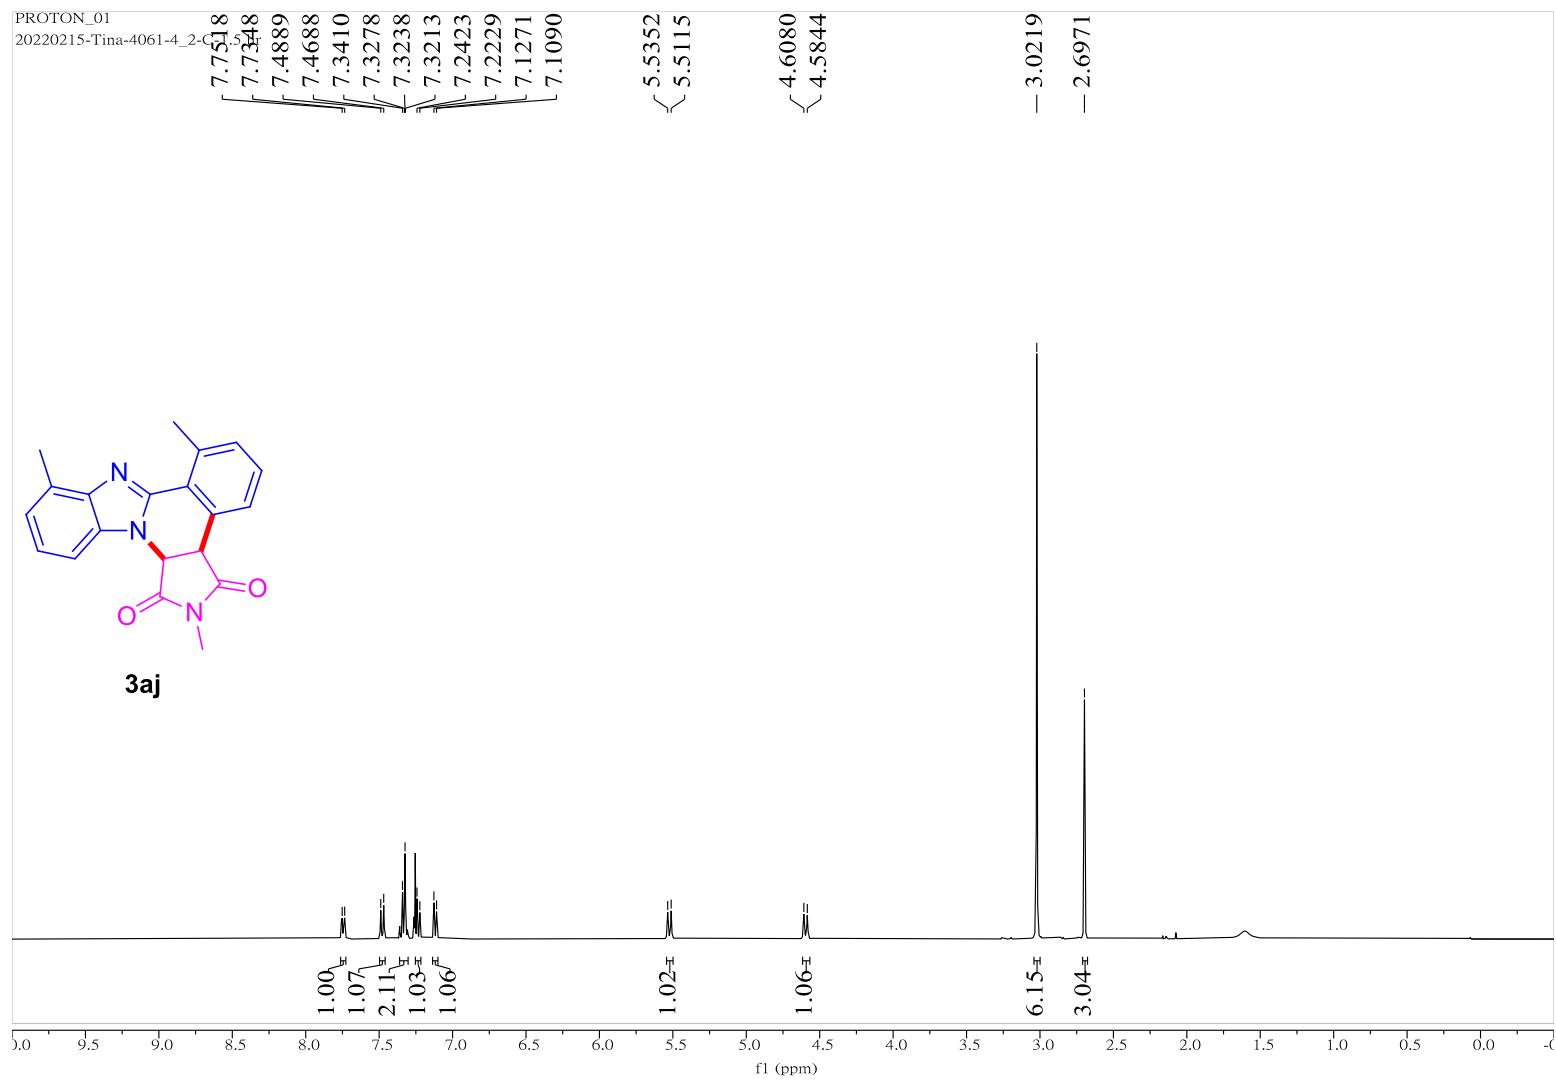

$^1\text{H}$  NMR spectrum (400 MHz) of compound **3aj** in  $\text{CDCl}_3$ .

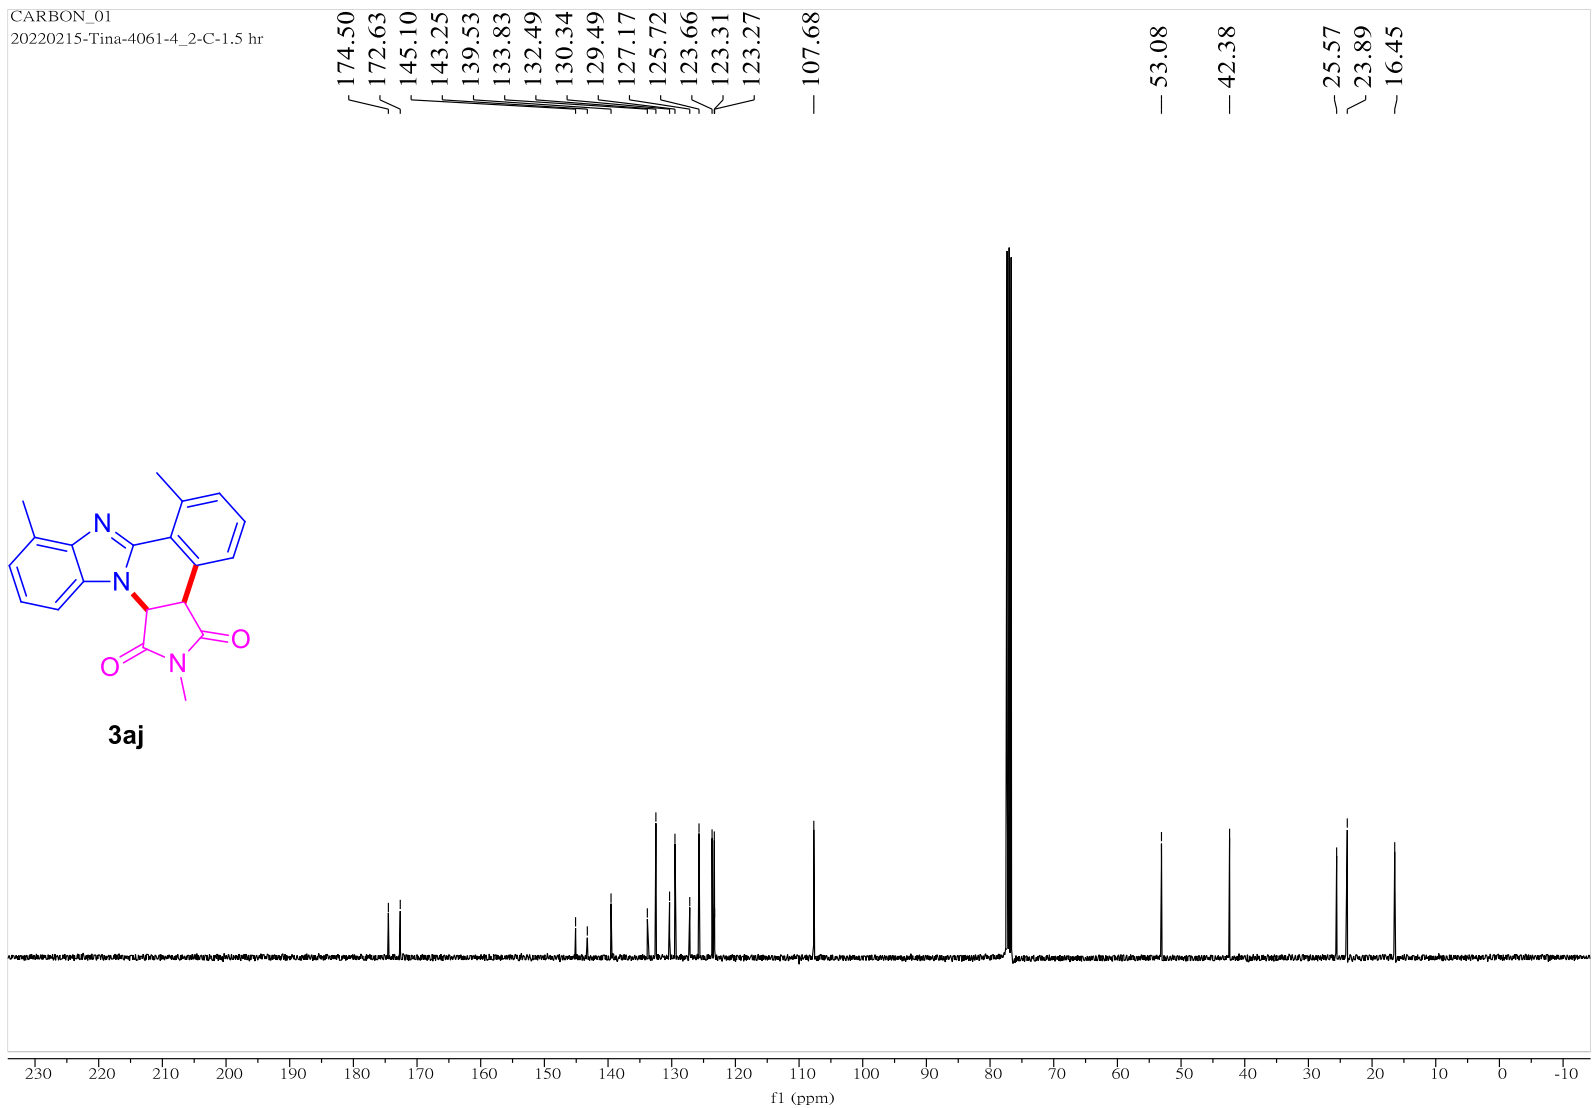

$^{13}\text{C}$  NMR spectrum (100 MHz) of compound **3aj** in  $\text{CDCl}_3$ .

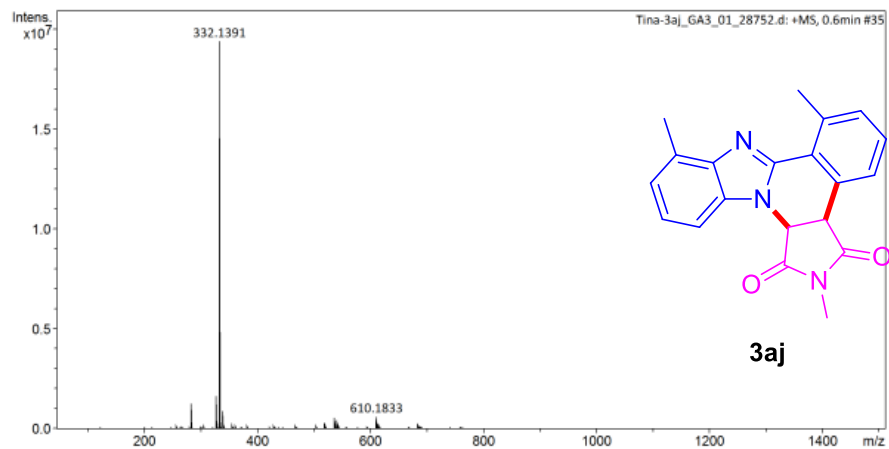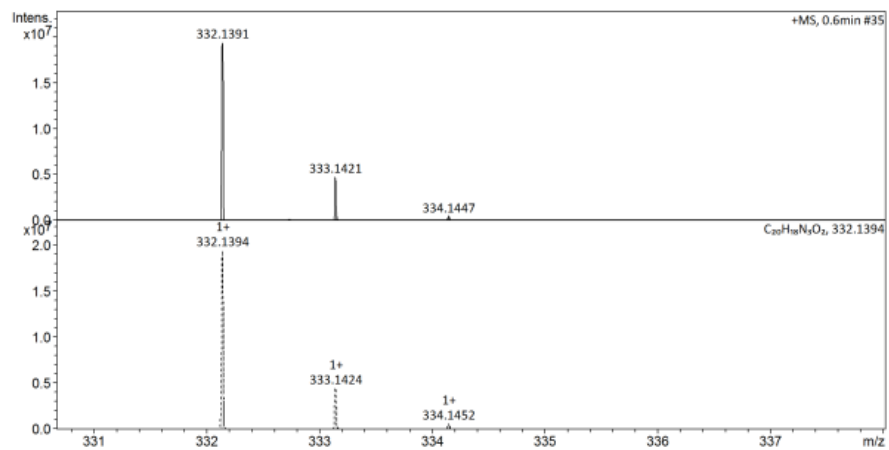

### Display Report

| Meas. m/z | # | Ion Formula                                                   | m/z      | err [ppm] | mSigma | # Sigma | Score  | rdb  | e <sup>-</sup> Conf | N-Rule | Adduct |
|-----------|---|---------------------------------------------------------------|----------|-----------|--------|---------|--------|------|---------------------|--------|--------|
| 332.1391  | 1 | C <sub>20</sub> H <sub>18</sub> N <sub>3</sub> O <sub>2</sub> | 332.1394 | 0.8       | 9.1    | 1       | 100.00 | 13.5 | even                | ok     | M+H    |

HRMS (ESI) of compound **3aj**.

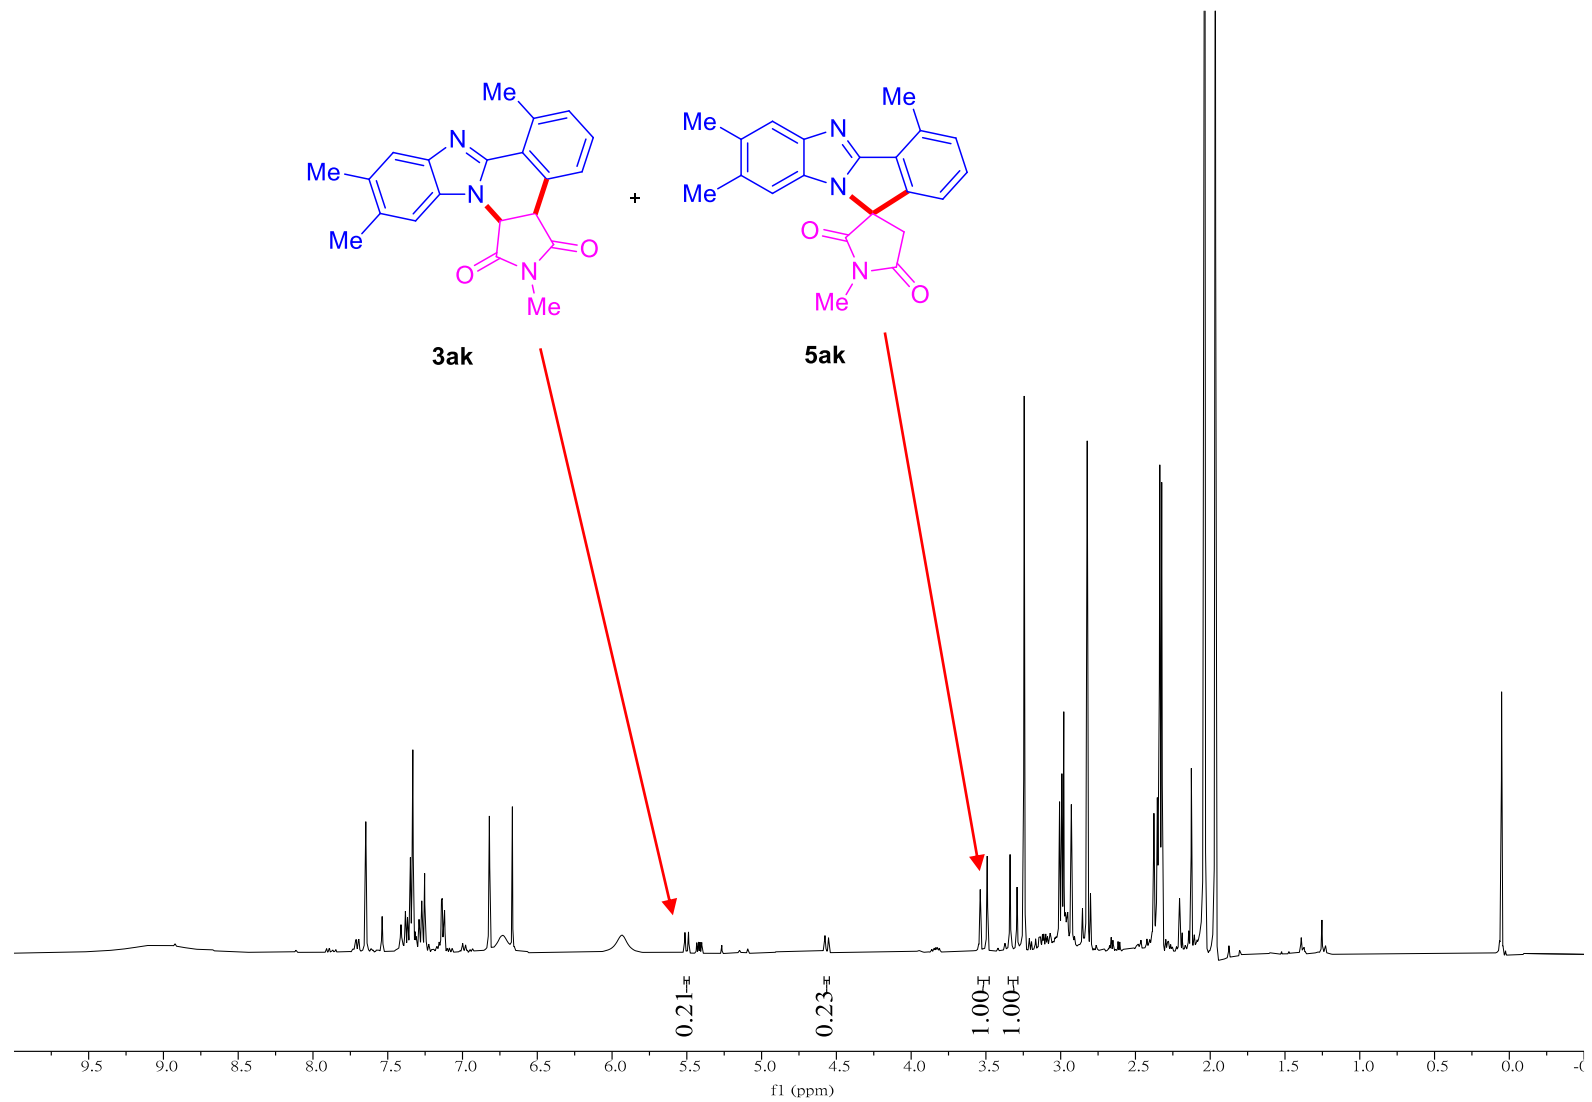

$^1\text{H}$  NMR spectrum (400 MHz) of compound **3ak** and **5ak** in  $\text{CDCl}_3$ .

PROTON\_01  
20201009-HYT-2089

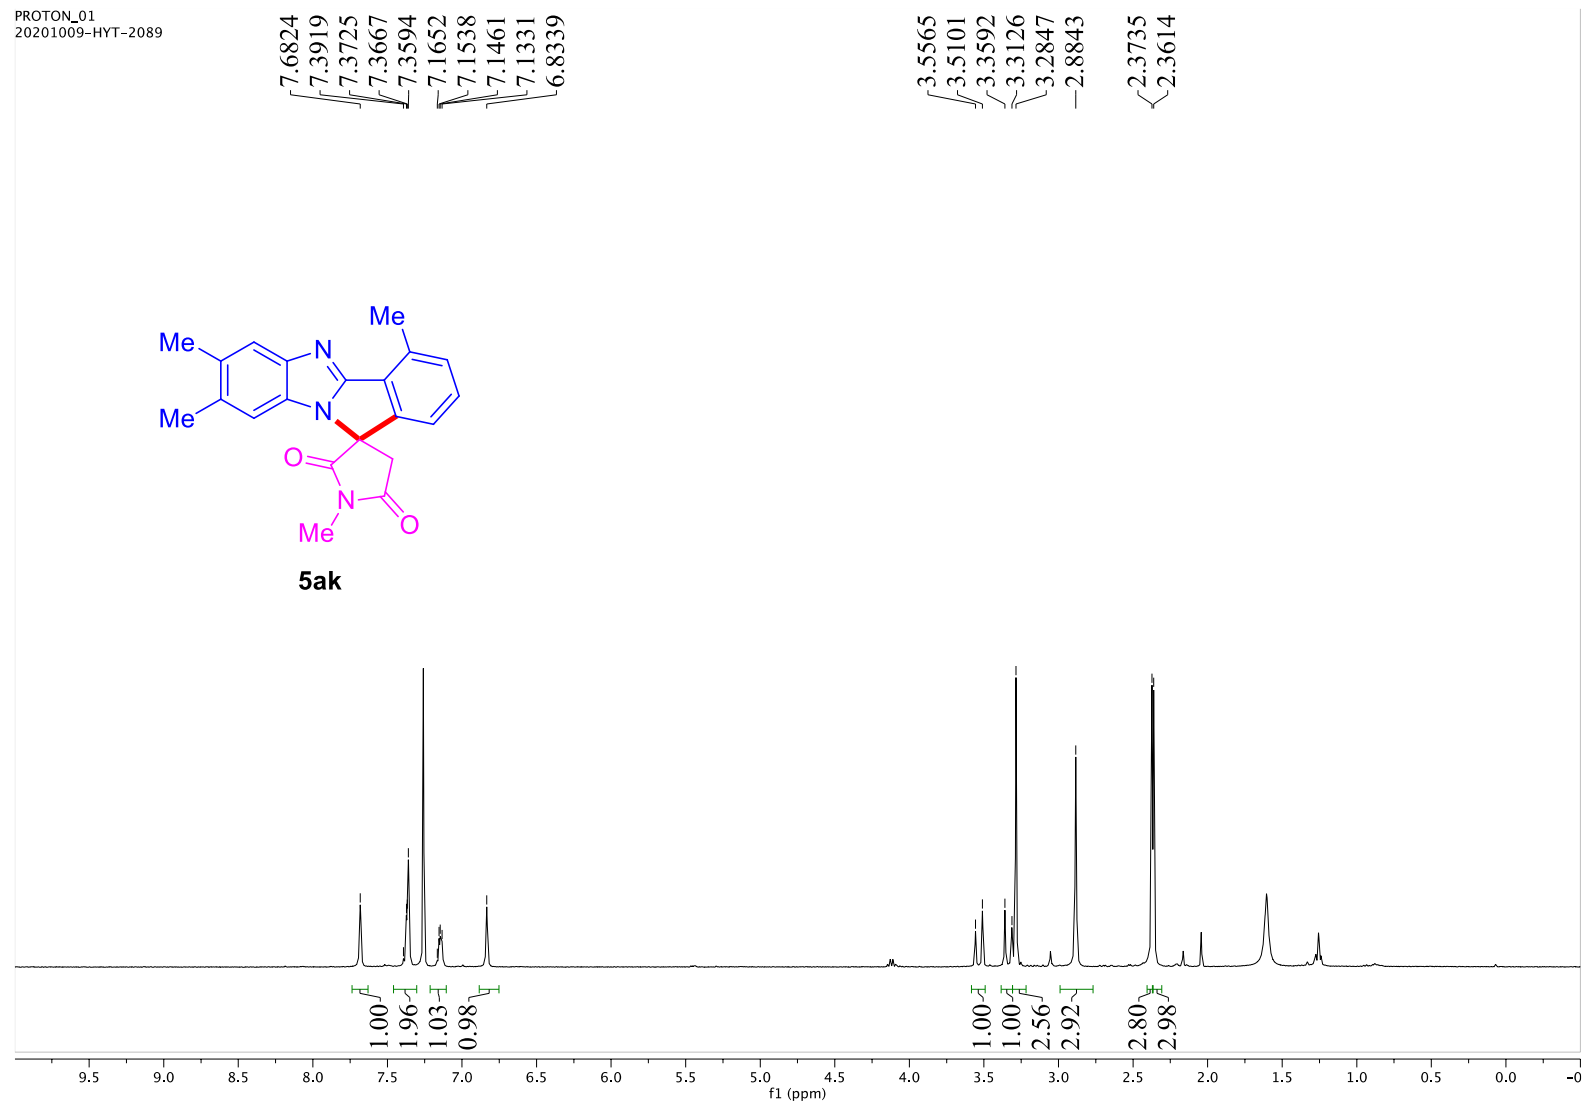

$^1\text{H}$  NMR spectrum (400 MHz) of compound **5ak** in  $\text{CDCl}_3$ .

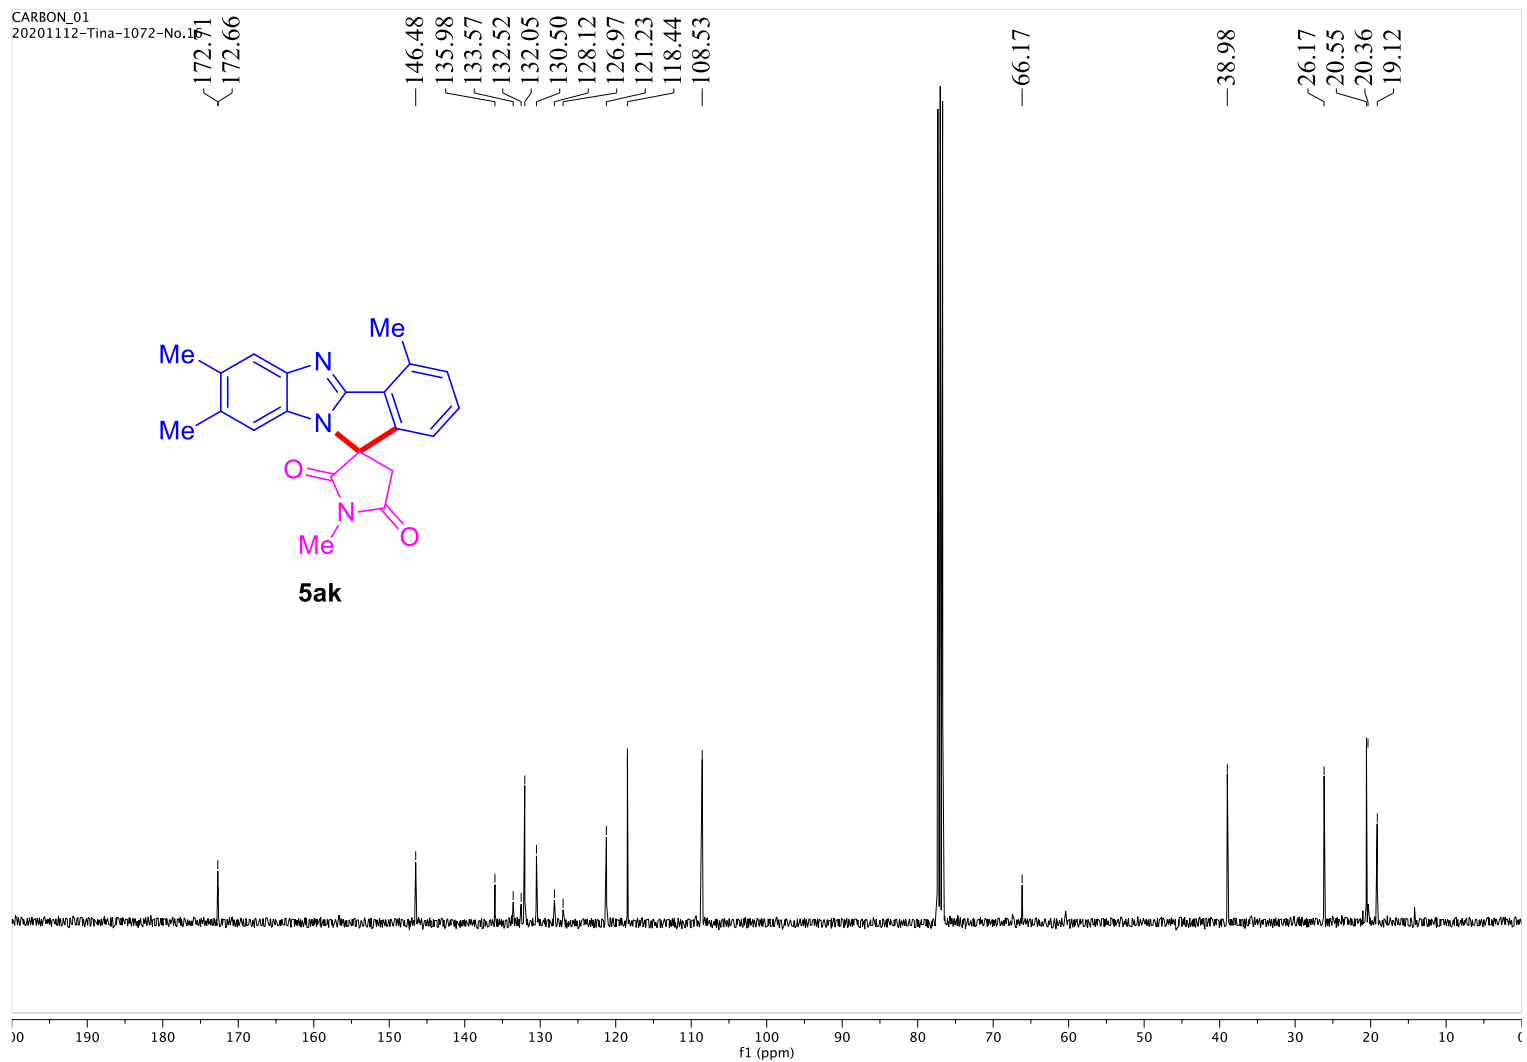

$^{13}\text{C}$  NMR spectrum (100 MHz) of compound **5ak** in  $\text{CDCl}_3$ .



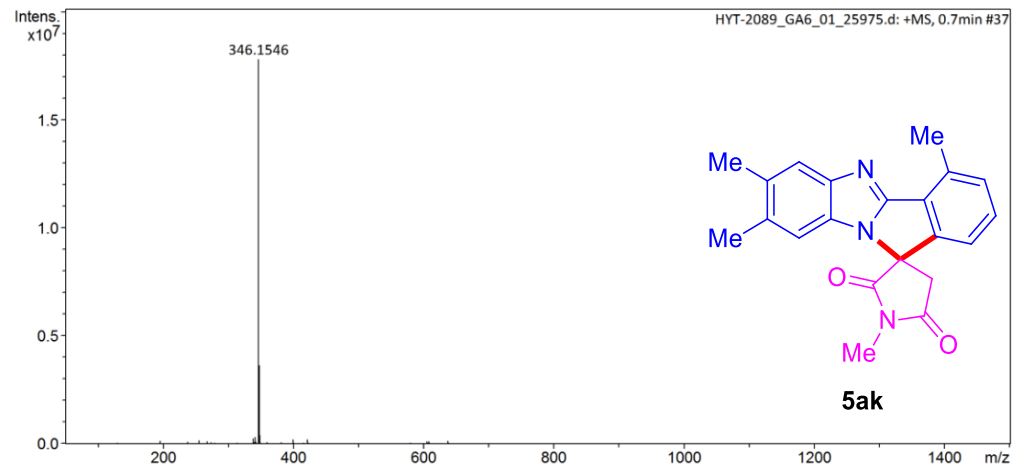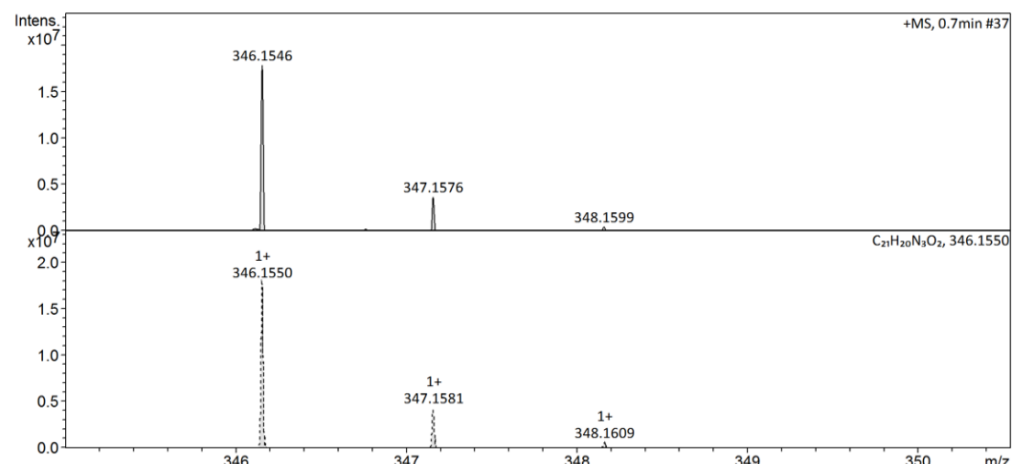

### Display Report

| Meas. m/z | # | Ion Formula                                                   | m/z      | err [ppm] | mSigma | # Sigma | Score  | rdb  | e <sup>-</sup> Conf | N-Rule | Adduct |
|-----------|---|---------------------------------------------------------------|----------|-----------|--------|---------|--------|------|---------------------|--------|--------|
| 346.1546  | 1 | C <sub>21</sub> H <sub>20</sub> N <sub>3</sub> O <sub>2</sub> | 346.1550 | -1.2      | 22.5   | 1       | 100.00 | 13.5 | even                | ok     | M+H    |

HRMS (ESI) of compound **5ak**.

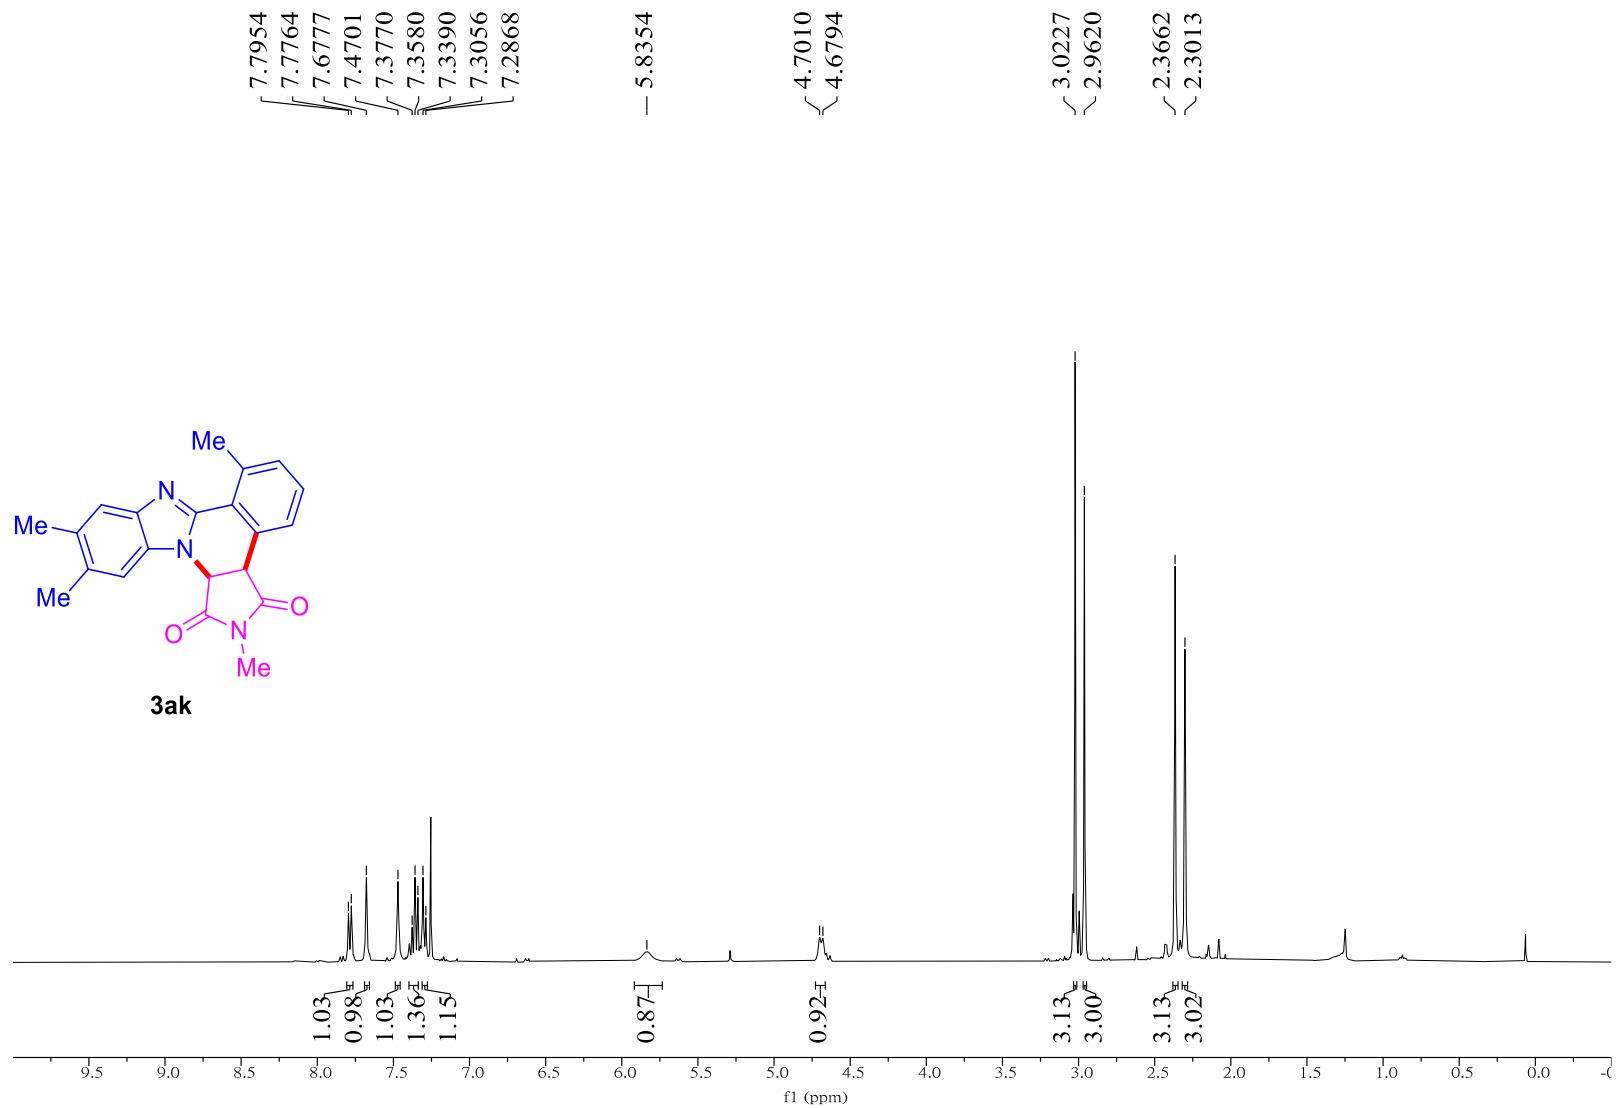

**<sup>1</sup>H NMR spectrum (400 MHz) of compound **3ak** in CDCl<sub>3</sub>.**

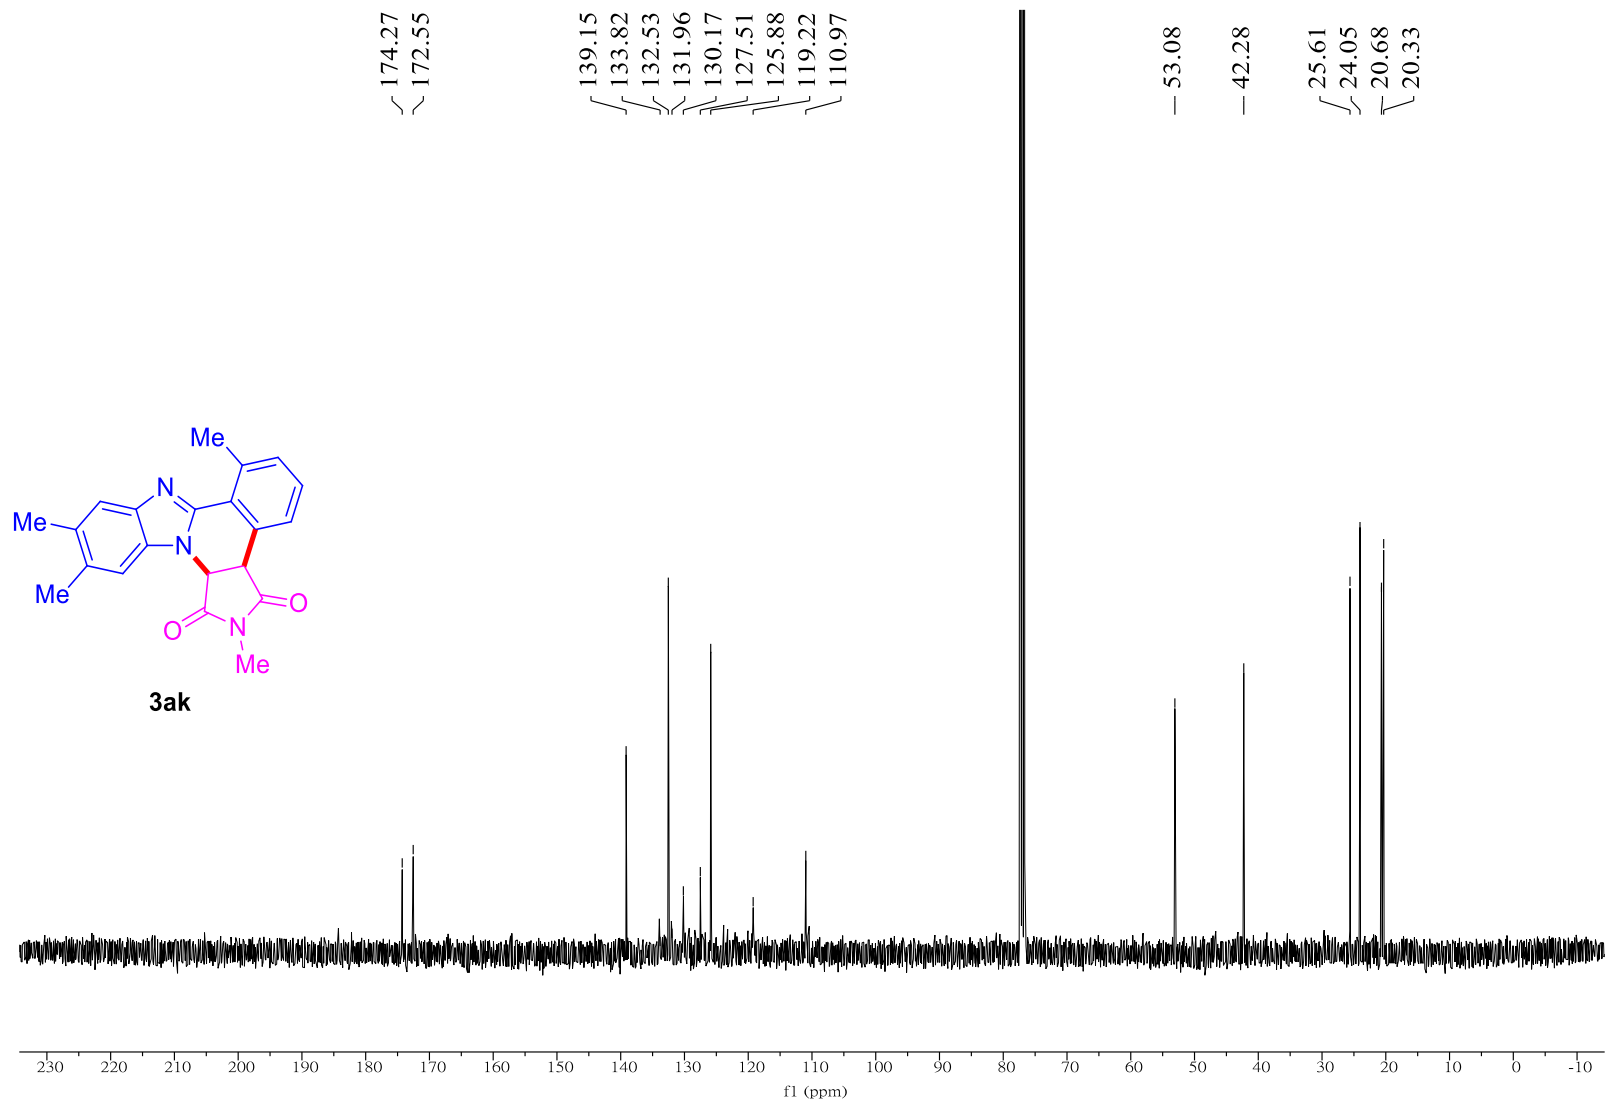

<sup>13</sup>C NMR spectrum (100 MHz) of compound **3ak** in CDCl<sub>3</sub>.

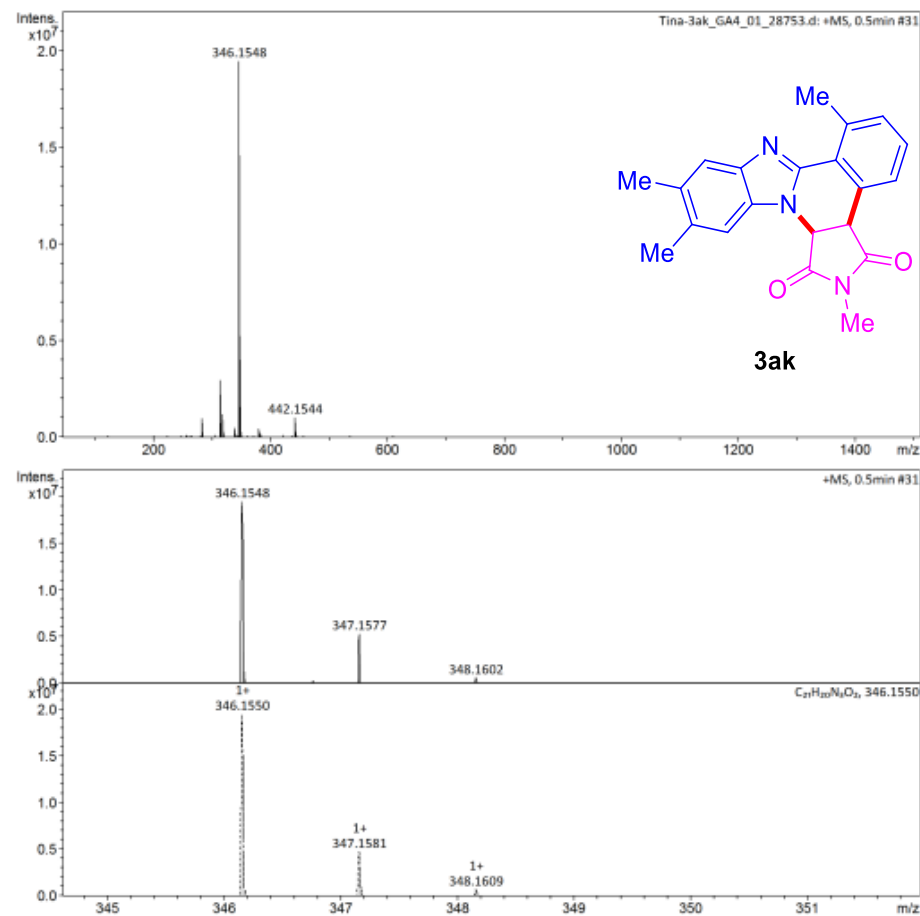

### Display Report

| Meas. m/z | # | Ion Formula                                                   | m/z      | err [ppm] | mSigma | # Sigma | Score  | rdb  | e <sup>-</sup> Conf | N-Rule | Adduct |
|-----------|---|---------------------------------------------------------------|----------|-----------|--------|---------|--------|------|---------------------|--------|--------|
| 346.1548  | 1 | C <sub>21</sub> H <sub>20</sub> N <sub>3</sub> O <sub>2</sub> | 346.1550 | 0.5       | 16.8   | 1       | 100.00 | 13.5 | even                | ok     | M+H    |

HRMS (ESI) of compound **3ak**.

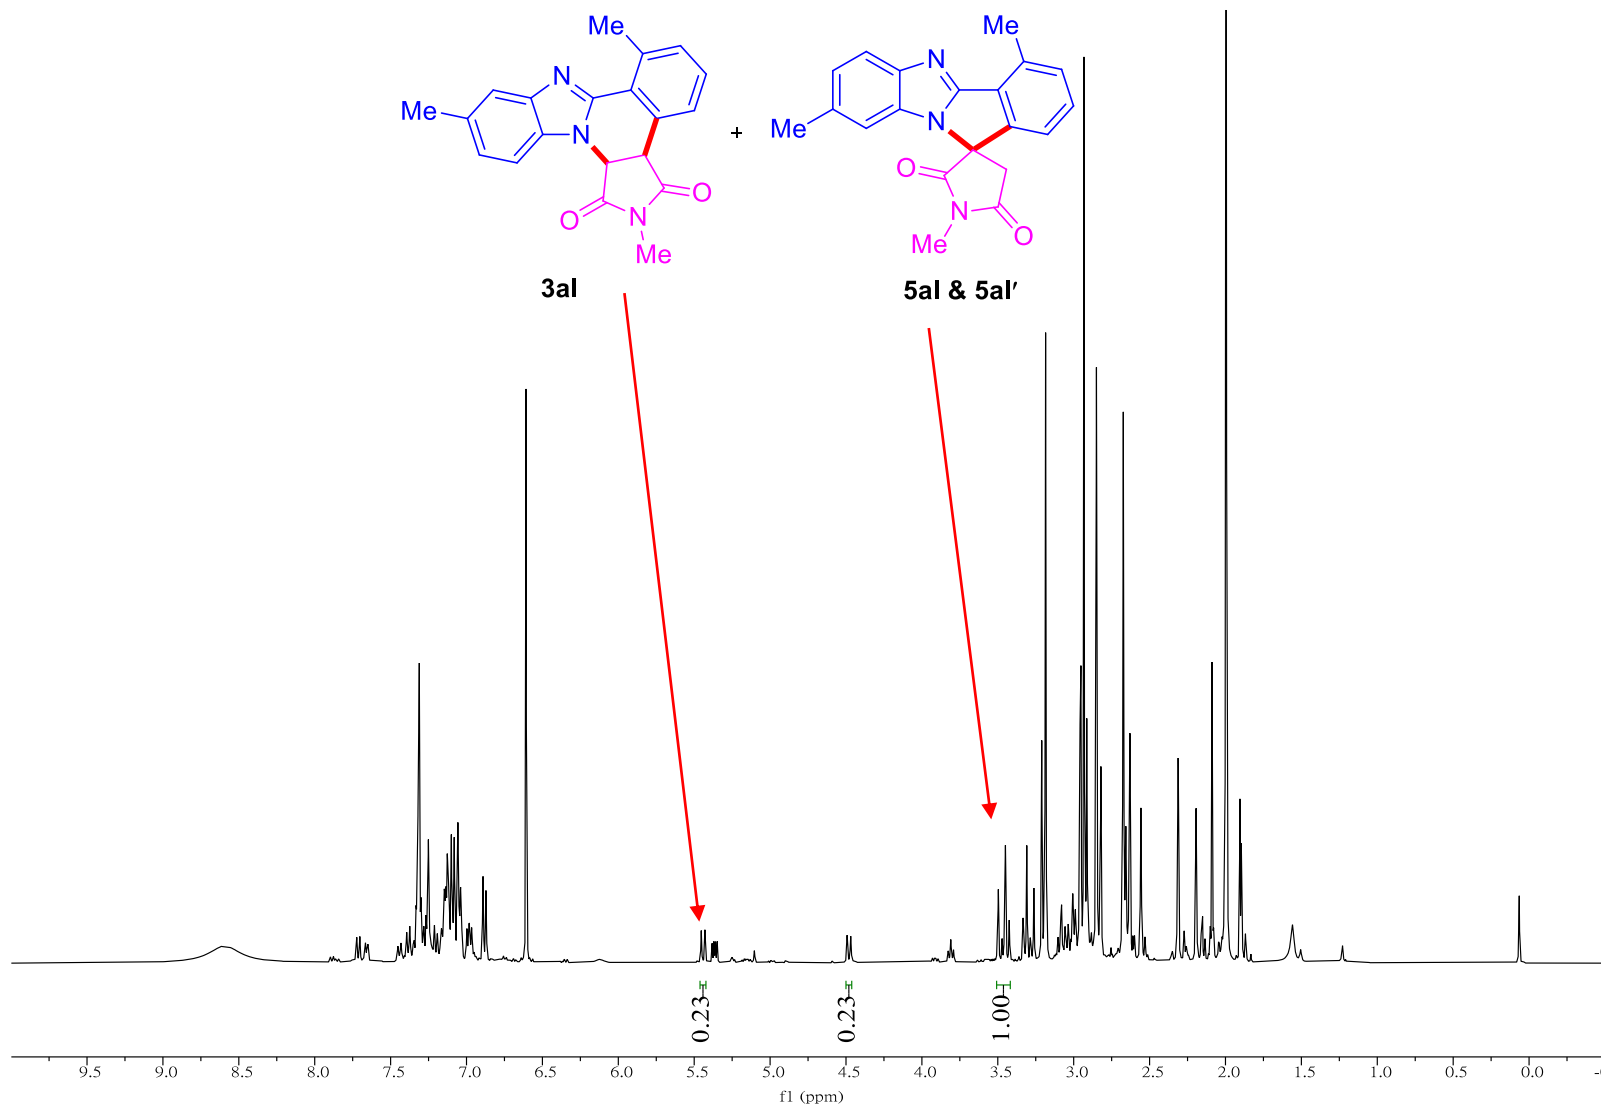

$^1\text{H}$  NMR spectrum (400 MHz) of compound **3al** and **5al** and **5al'** in  $\text{CDCl}_3$ .

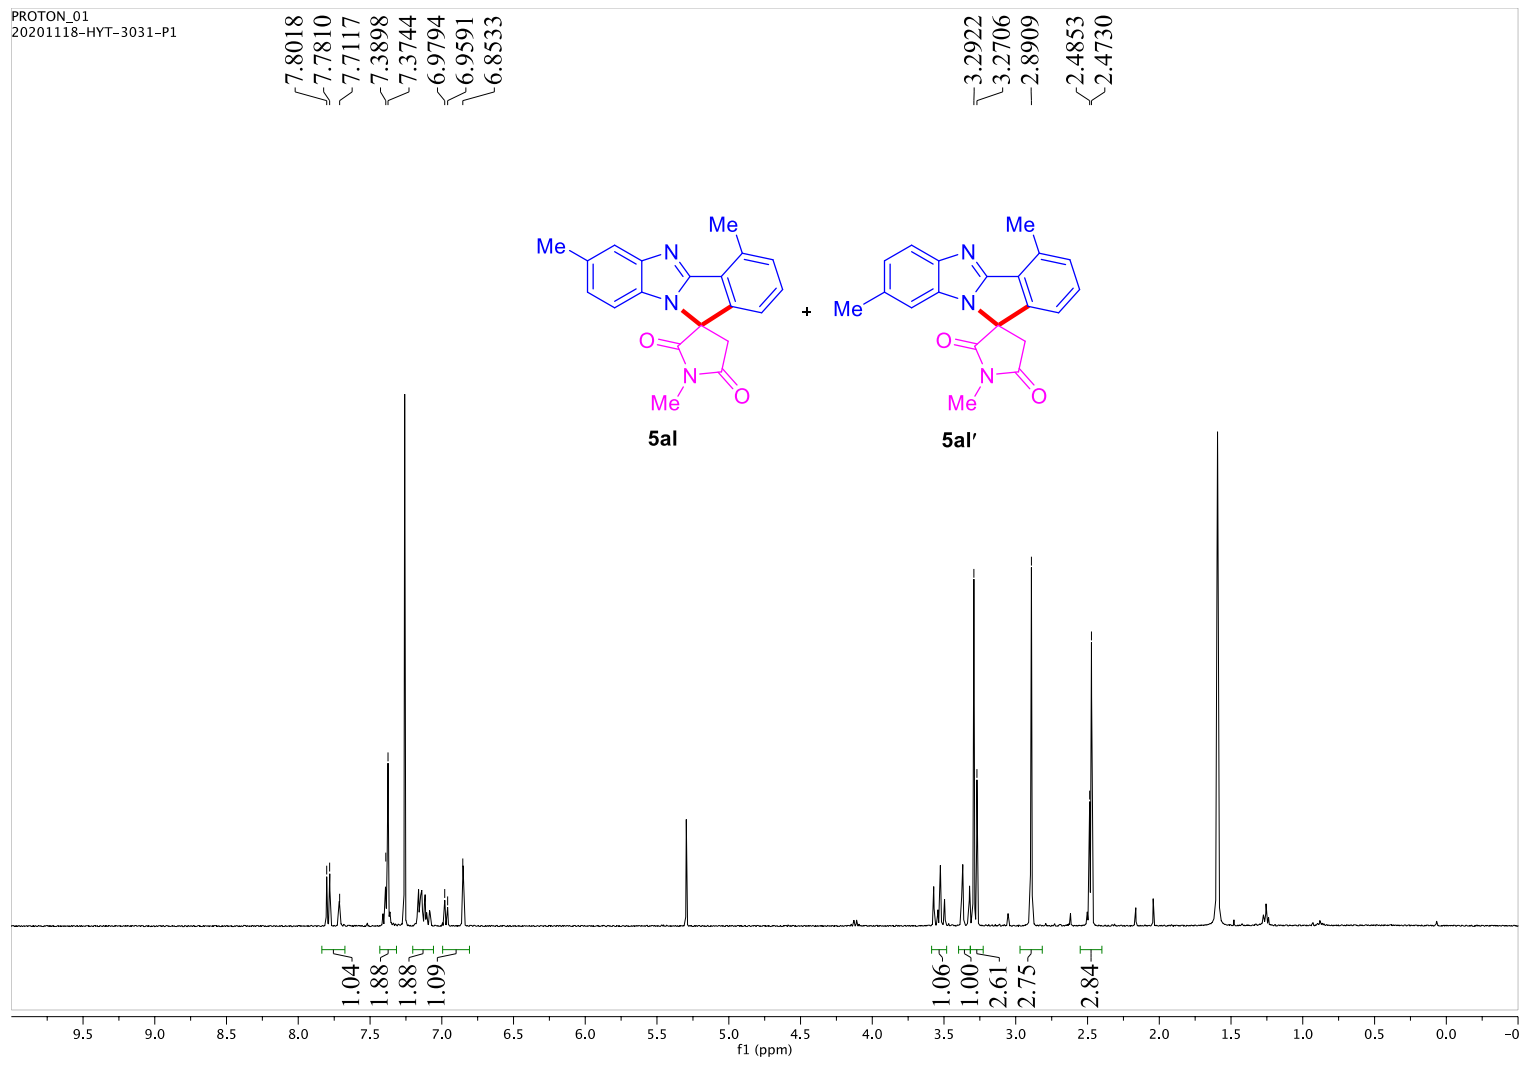

$^1\text{H}$  NMR spectrum (400 MHz) of compound **5al** and **5al'** in  $\text{CDCl}_3$ .

CARBON\_01  
20201118-HYT-3031-P1

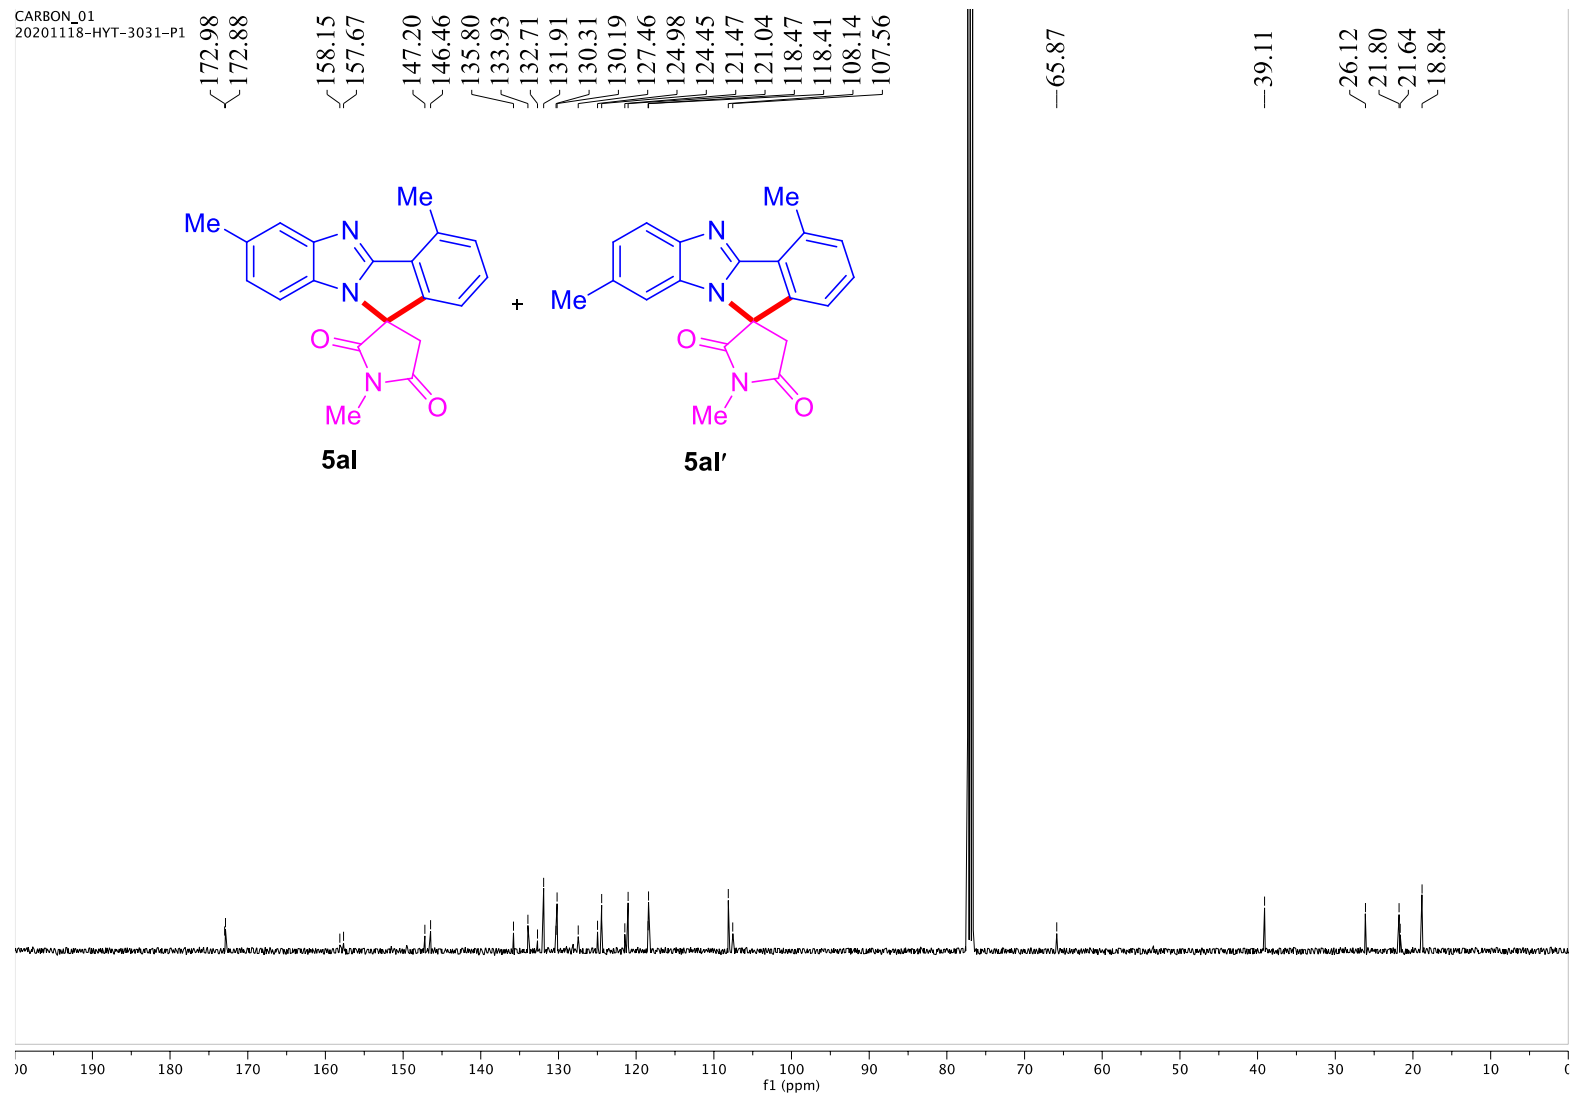

$^{13}\text{C}$  NMR spectrum (100 MHz) of compound **5al** and **5al'** in  $\text{CDCl}_3$ .

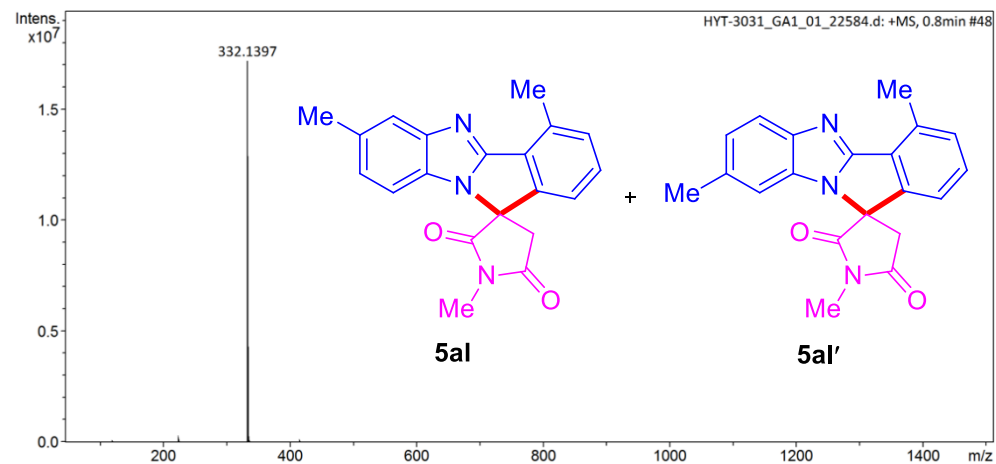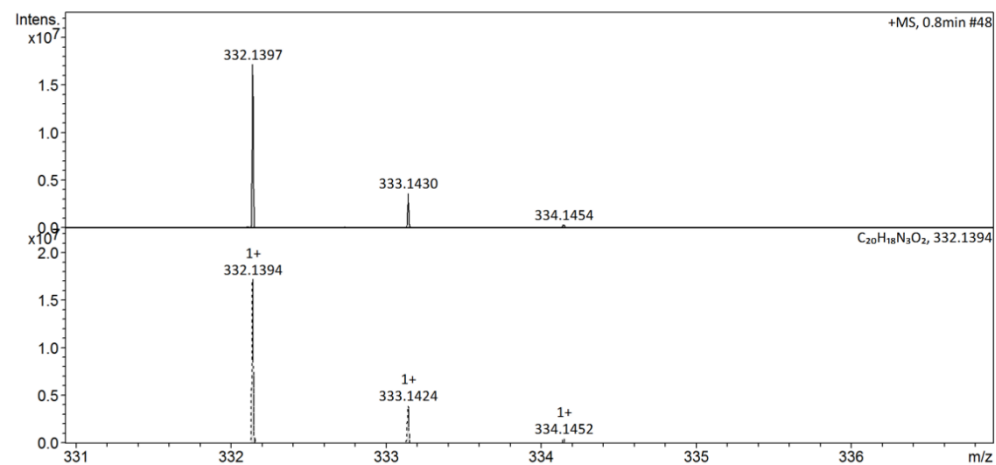

## Display Report

| Meas. m/z | # | Ion Formula                                                   | m/z      | err [ppm] | mSigma | # Sigma | Score  | rdb  | e <sup>-</sup> Conf | N-Rule | Adduct |
|-----------|---|---------------------------------------------------------------|----------|-----------|--------|---------|--------|------|---------------------|--------|--------|
| 332.1397  | 1 | C <sub>20</sub> H <sub>18</sub> N <sub>3</sub> O <sub>2</sub> | 332.1394 | -1.0      | 11.0   | 1       | 100.00 | 13.5 | even                | ok     | M+H    |

HRMS (ESI) of compound **5al** and **5al'**.



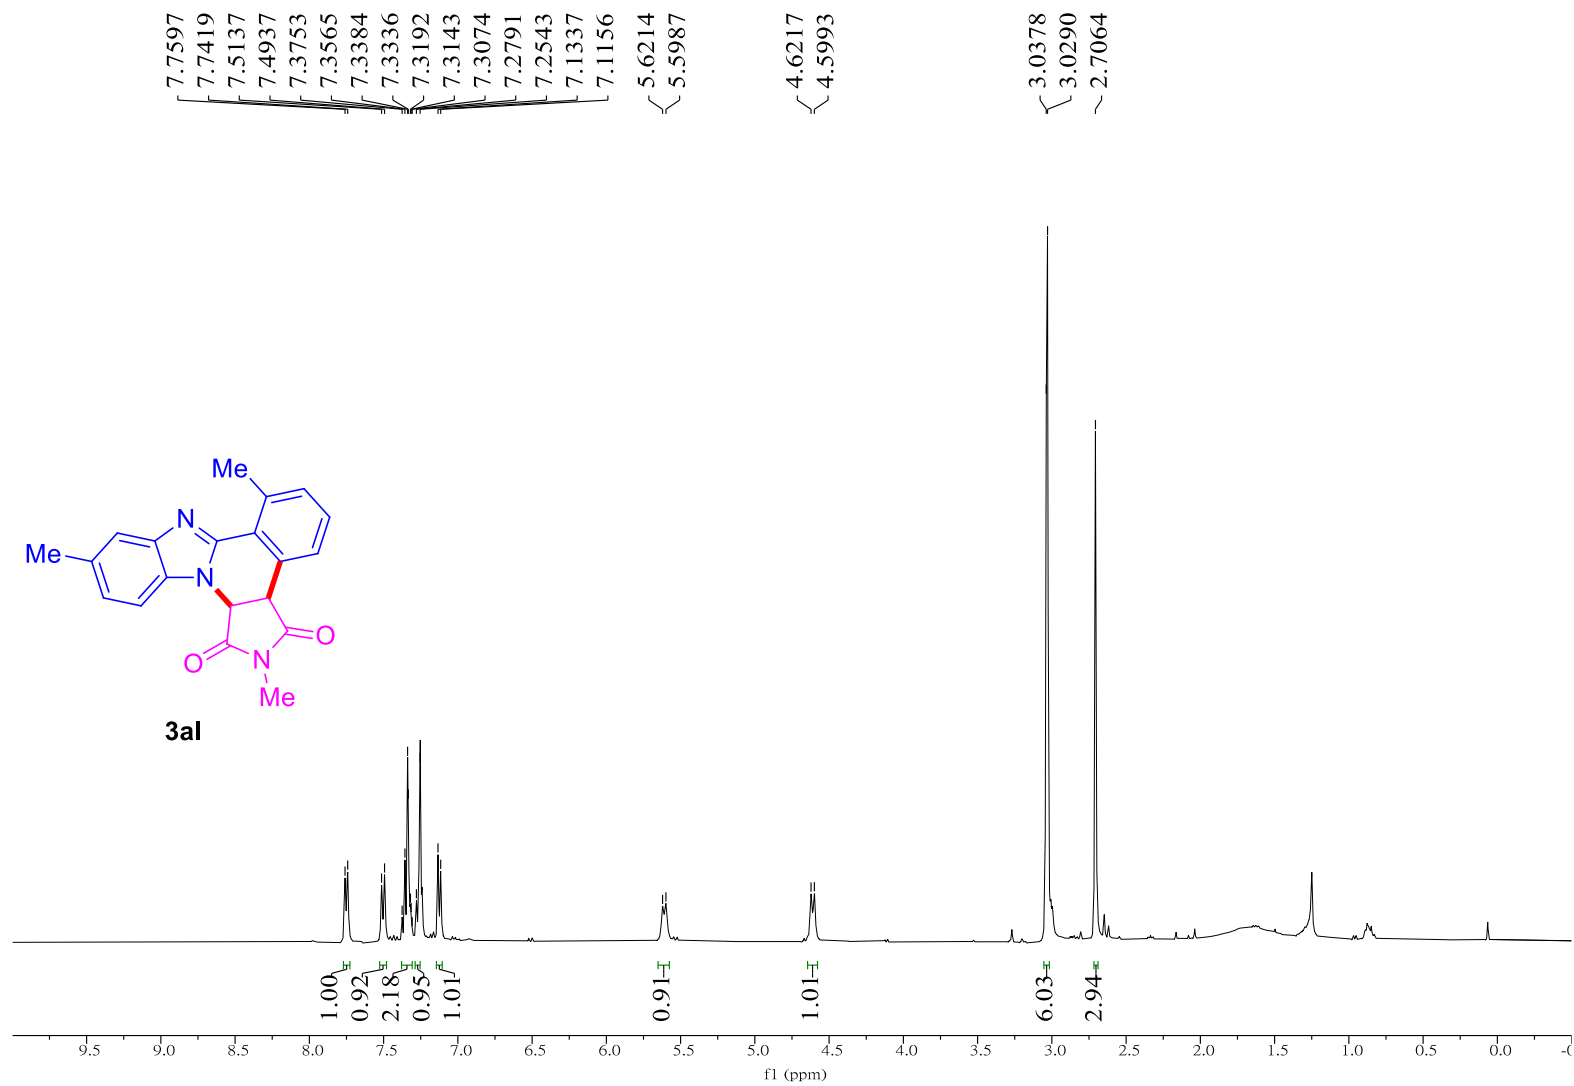

$^1\text{H}$  NMR spectrum (400 MHz) of compound **3al** in  $\text{CDCl}_3$ .

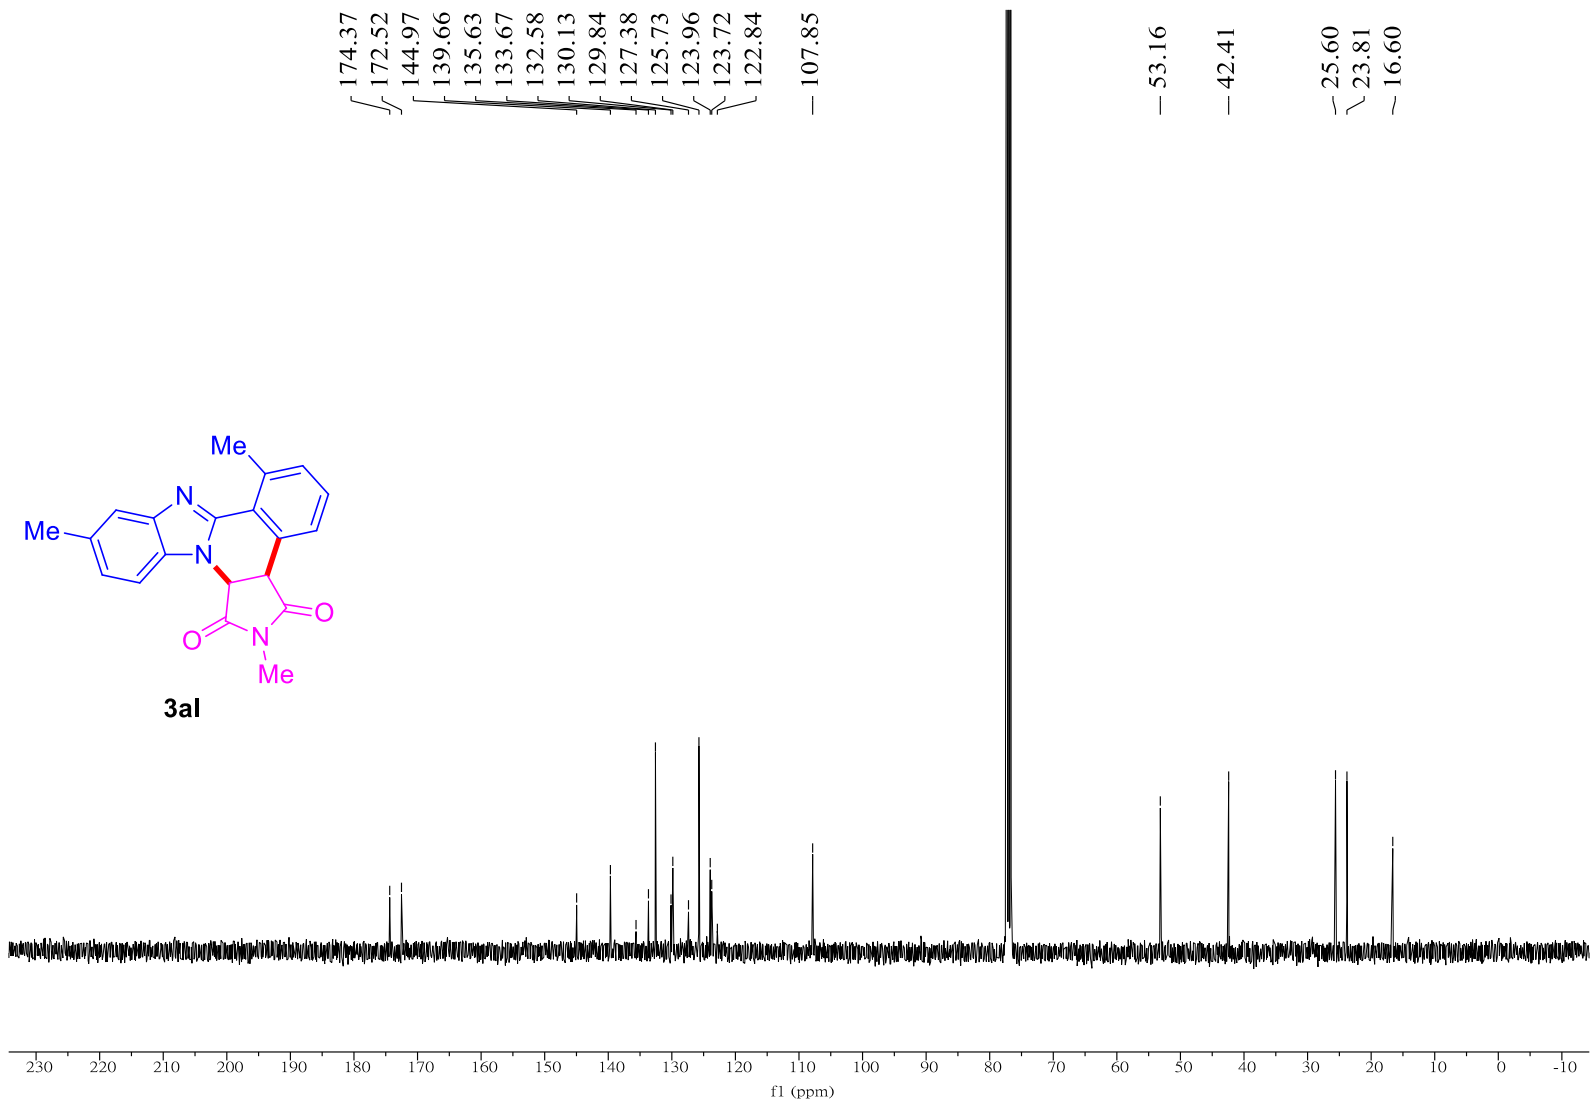

<sup>13</sup>C NMR spectrum (100 MHz) of compound **3al** in CDCl<sub>3</sub>.

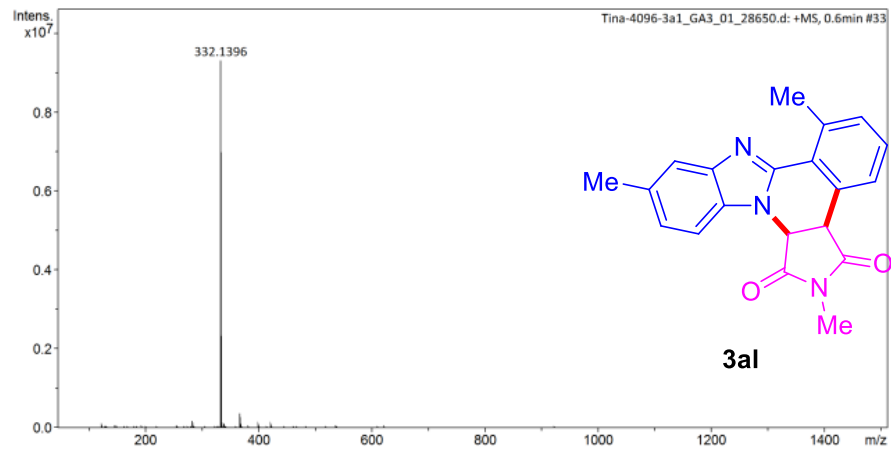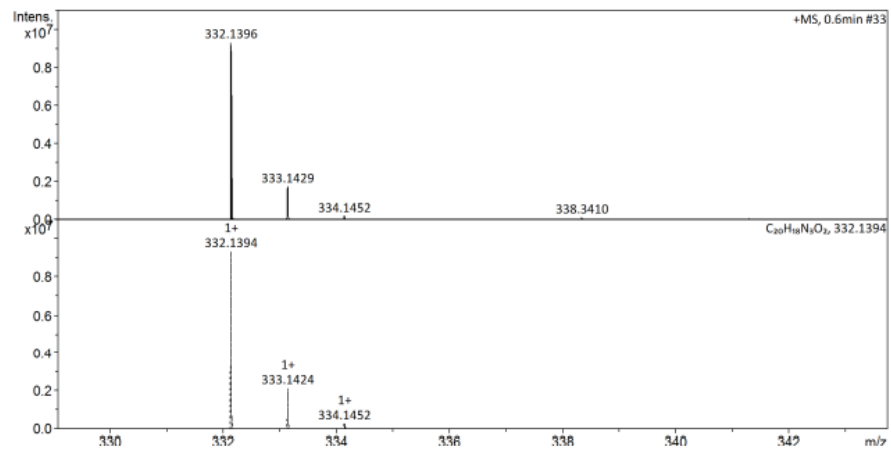

## Display Report

| Meas. m/z | # | Ion Formula                                                   | m/z      | err [ppm] | mSigma | # Sigma | Score  | rdb  | e <sup>-</sup> Conf | N-Rule | Adduct |
|-----------|---|---------------------------------------------------------------|----------|-----------|--------|---------|--------|------|---------------------|--------|--------|
| 332.1396  | 1 | C <sub>20</sub> H <sub>18</sub> N <sub>3</sub> O <sub>2</sub> | 332.1394 | -0.7      | 26.3   | 1       | 100.00 | 13.5 | even                | ok     | M+H    |

HRMS (ESI) of compound **3a1**.

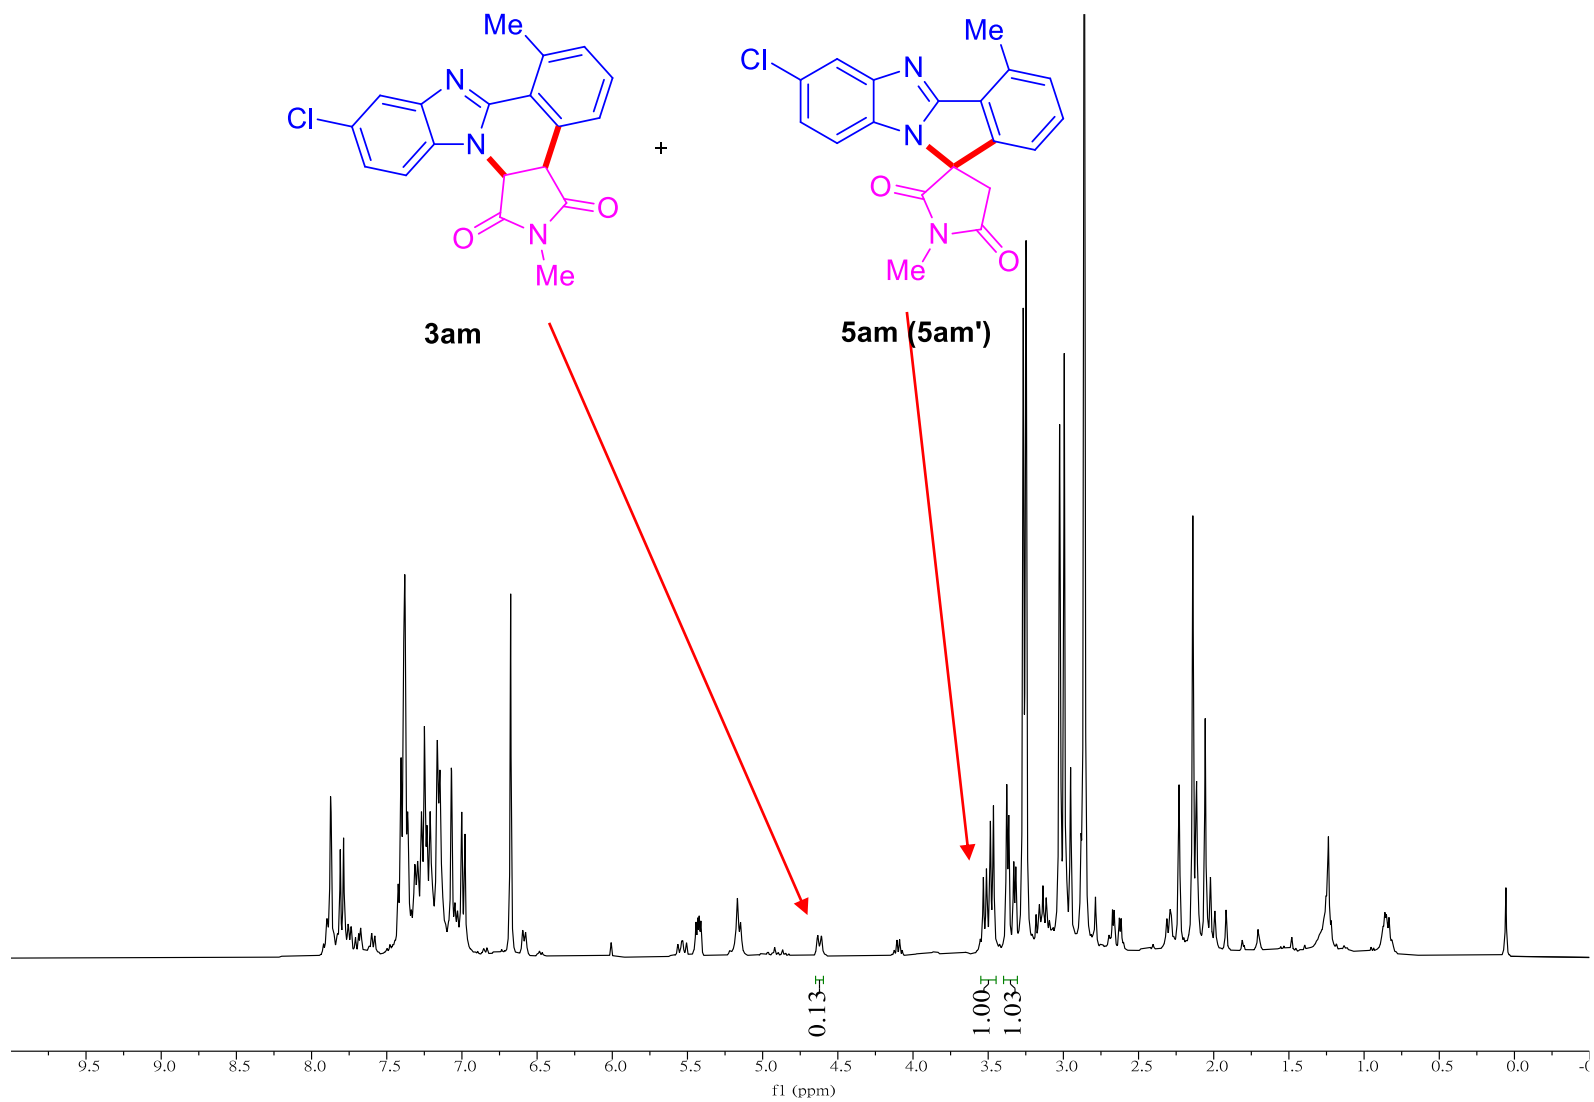

$^1\text{H}$  NMR spectrum (400 MHz) of compound **3am** and **5am** in  $\text{CDCl}_3$ .

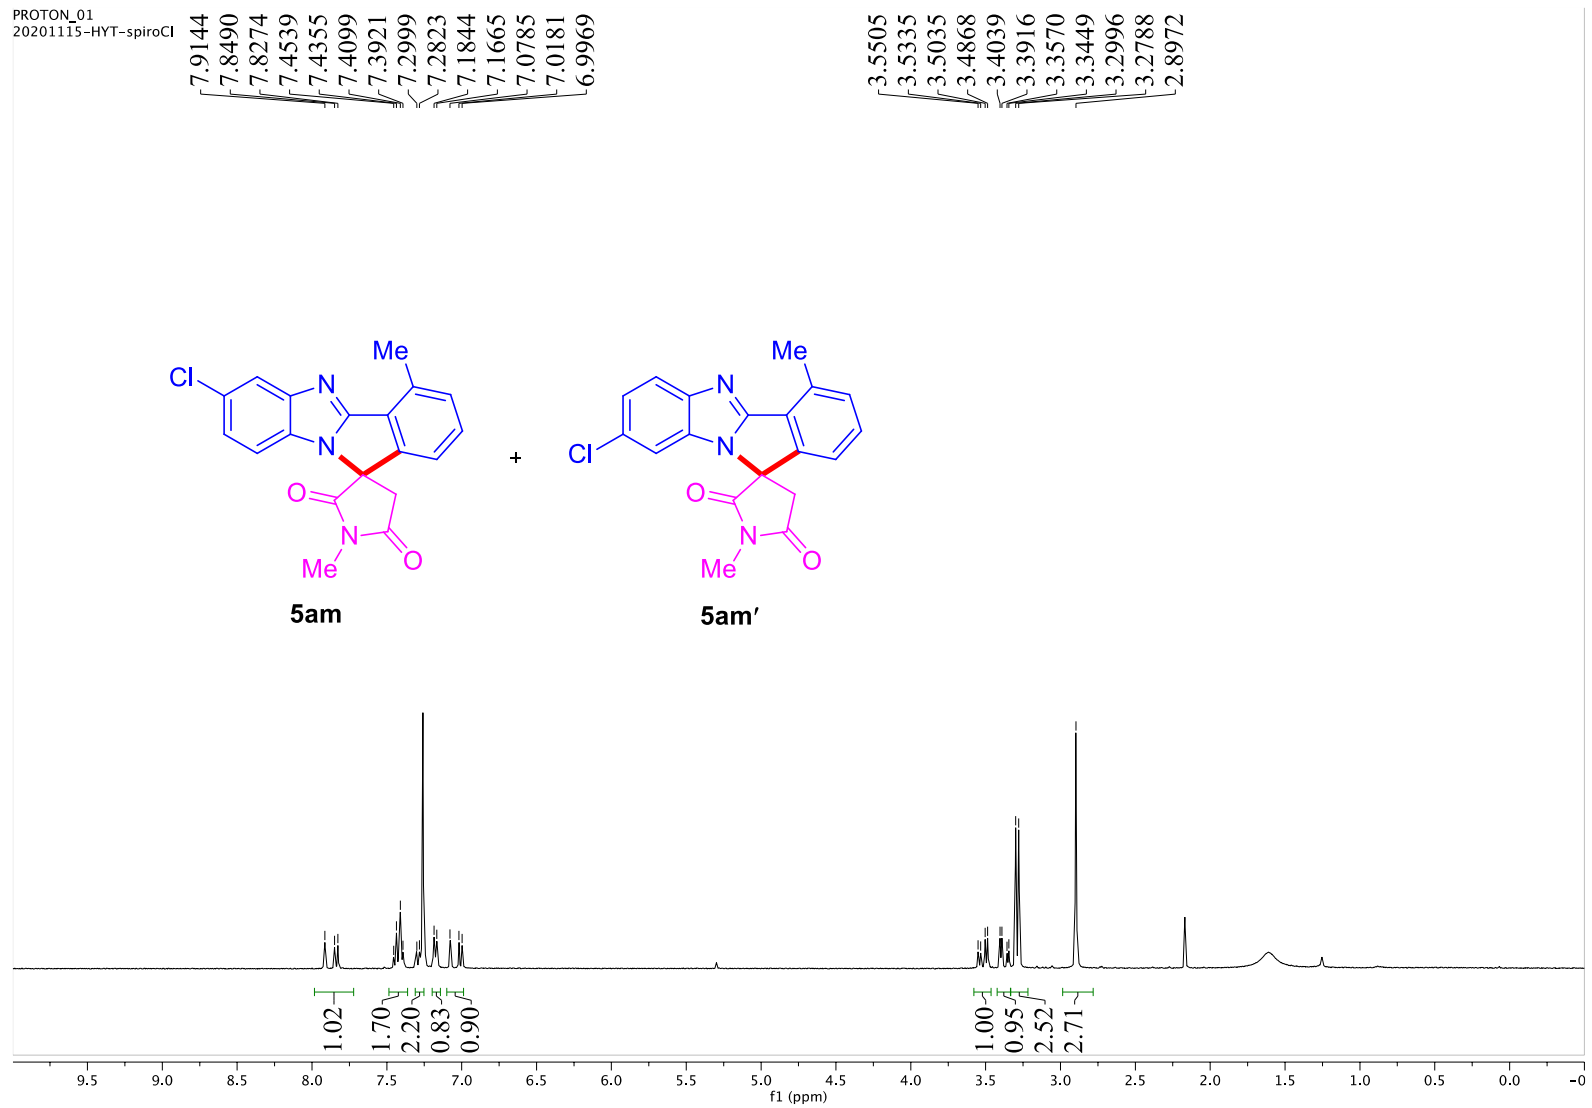

$^1\text{H}$  NMR spectrum (400 MHz) of compound **5am** and **5am'** in  $\text{CDCl}_3$ .

CARBON\_01  
20210610-HYT-spiroCl

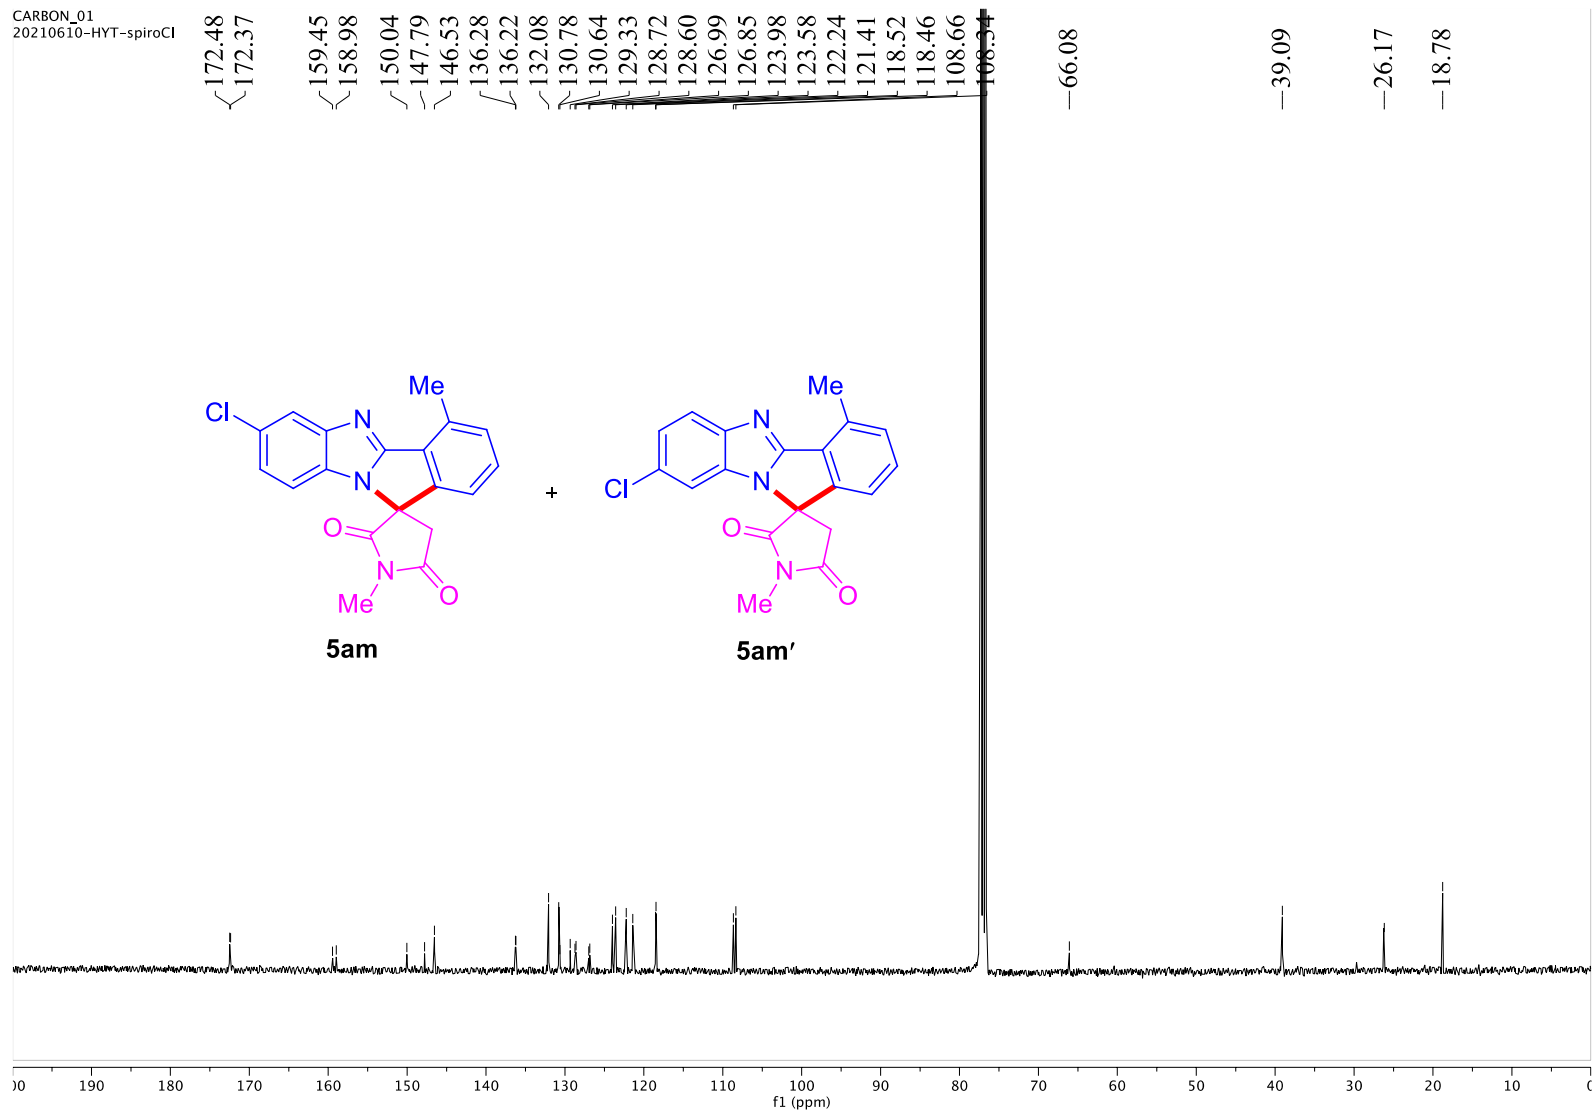

$^{13}\text{C}$  NMR spectrum (100 MHz) of compound **5am** and **5am'** in  $\text{CDCl}_3$ .

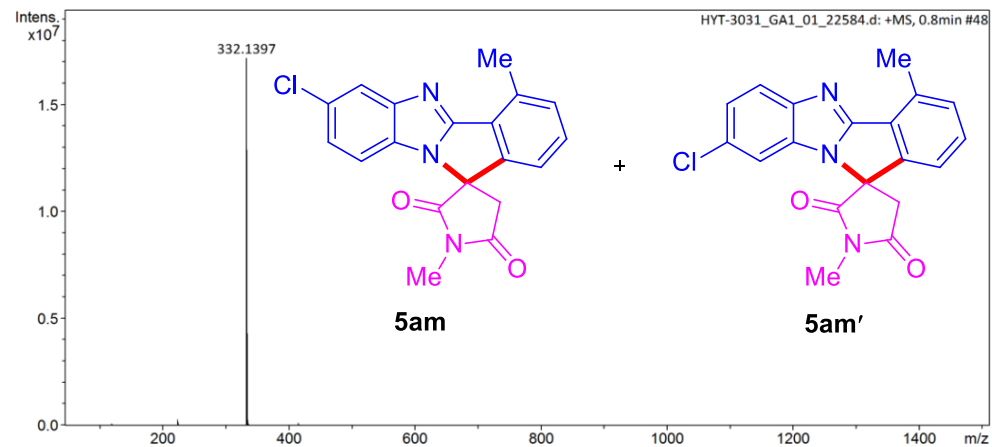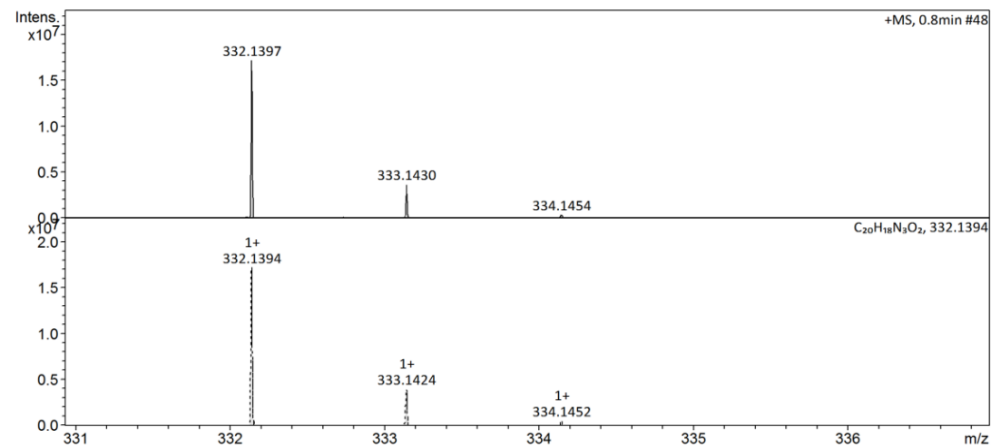

## Display Report

| Meas. m/z | # | Ion Formula                                                     | m/z      | err [ppm] | mSigma | # Sigma | Score  | rdb  | e <sup>-</sup> Conf | N-Rule | Adduct |
|-----------|---|-----------------------------------------------------------------|----------|-----------|--------|---------|--------|------|---------------------|--------|--------|
| 352.0847  | 1 | C <sub>19</sub> H <sub>15</sub> ClN <sub>3</sub> O <sub>2</sub> | 352.0847 | -0.0      | 30.6   | 1       | 100.00 | 13.5 | even                | ok     | M+H    |

HRMS (ESI) of compound **5am** and **5am'**.

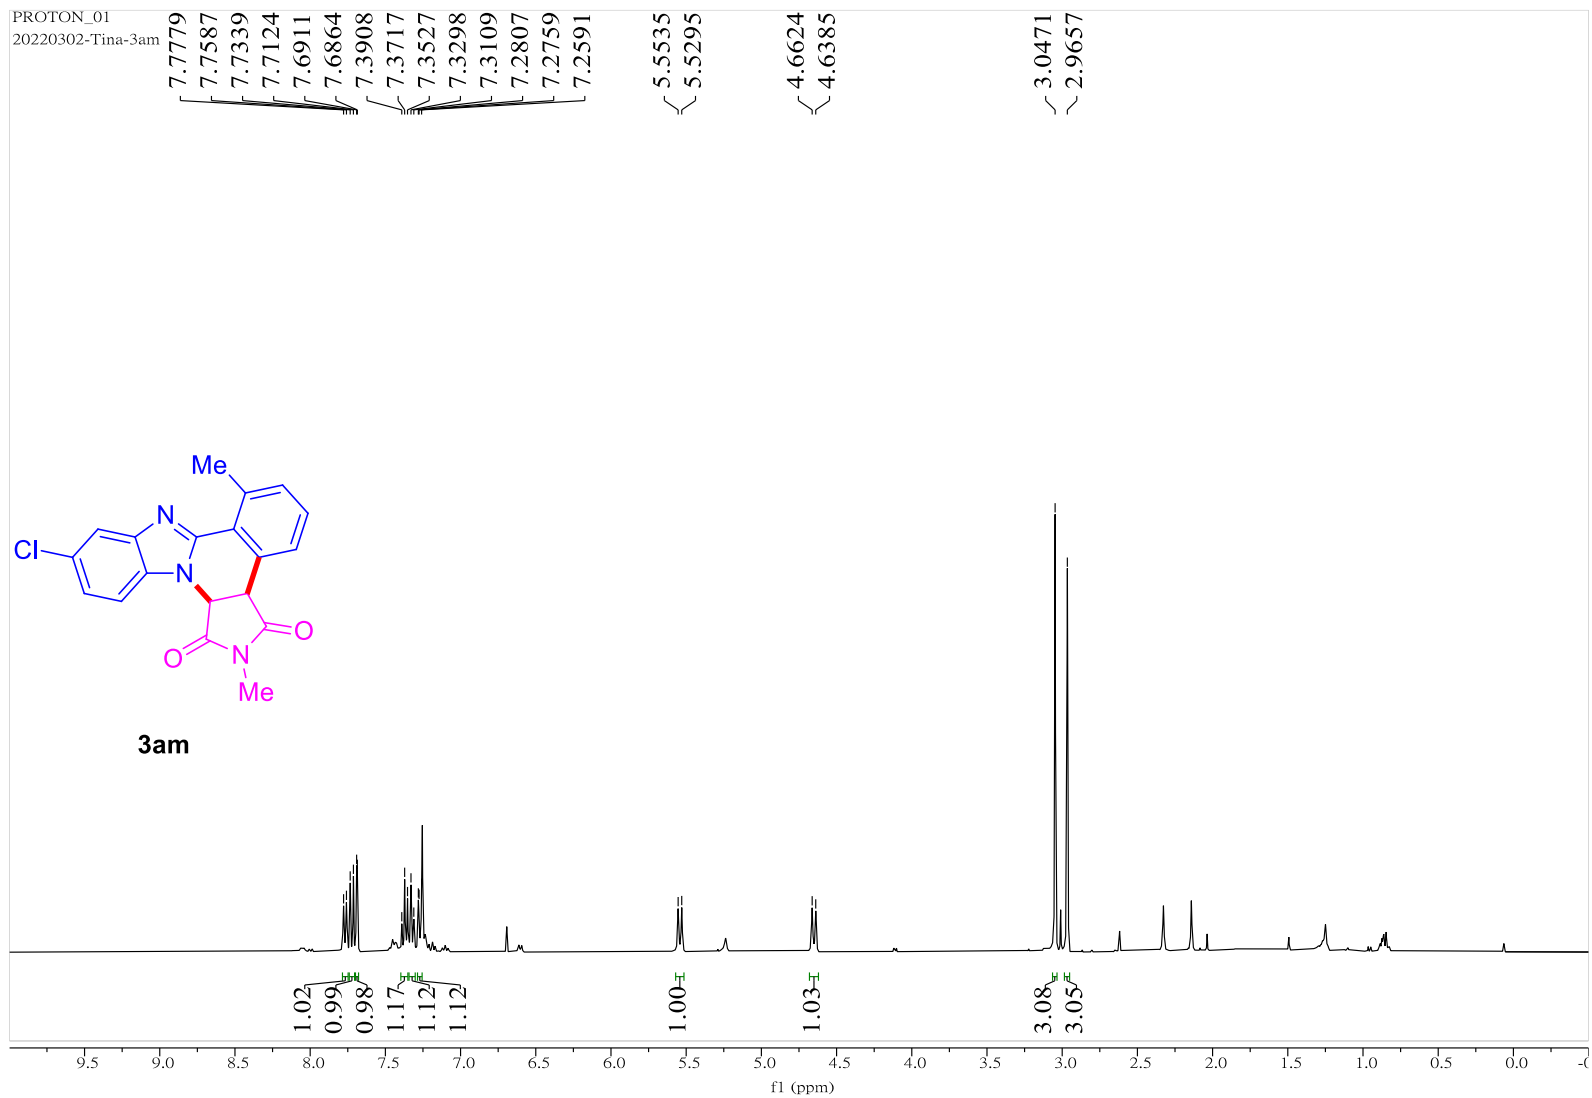

$^1\text{H}$  NMR spectrum (400 MHz) of compound **3am** in  $\text{CDCl}_3$ .



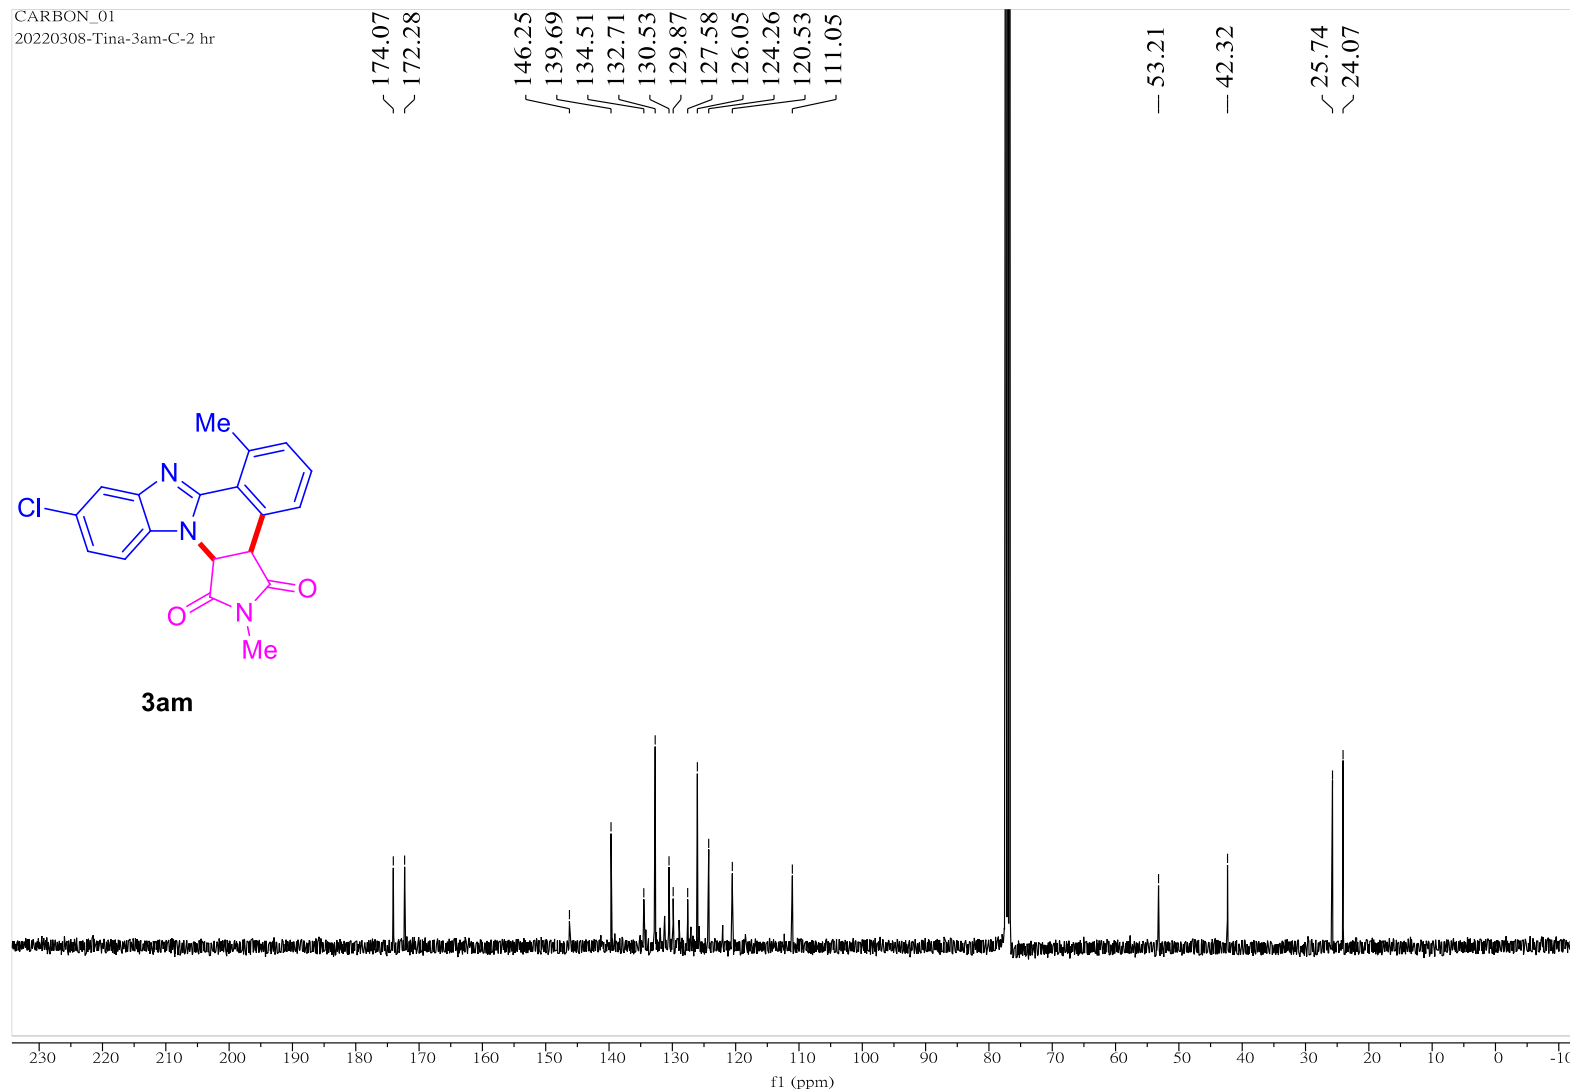

$^{13}\text{C}$  NMR spectrum (100 MHz) of compound **3am** in  $\text{CDCl}_3$ .

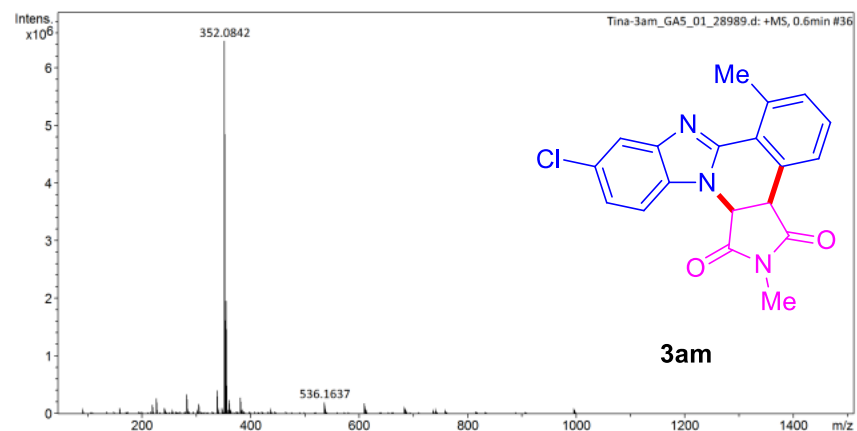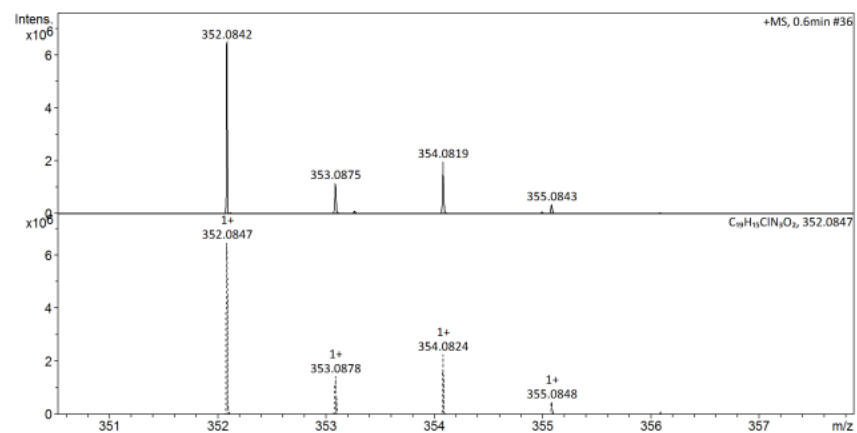

## Display Report

| Meas. m/z | # | Ion Formula                                                     | m/z      | err [ppm] | mSigma | # Sigma | Score  | rdb  | e <sup>-</sup> Conf | N-Rule | Adduct |
|-----------|---|-----------------------------------------------------------------|----------|-----------|--------|---------|--------|------|---------------------|--------|--------|
| 352.0842  | 1 | C <sub>19</sub> H <sub>15</sub> ClN <sub>3</sub> O <sub>2</sub> | 352.0847 | 1.5       | 27.5   | 1       | 100.00 | 13.5 | even                | ok     | M+H    |

HRMS (ESI) of compound **3am**.

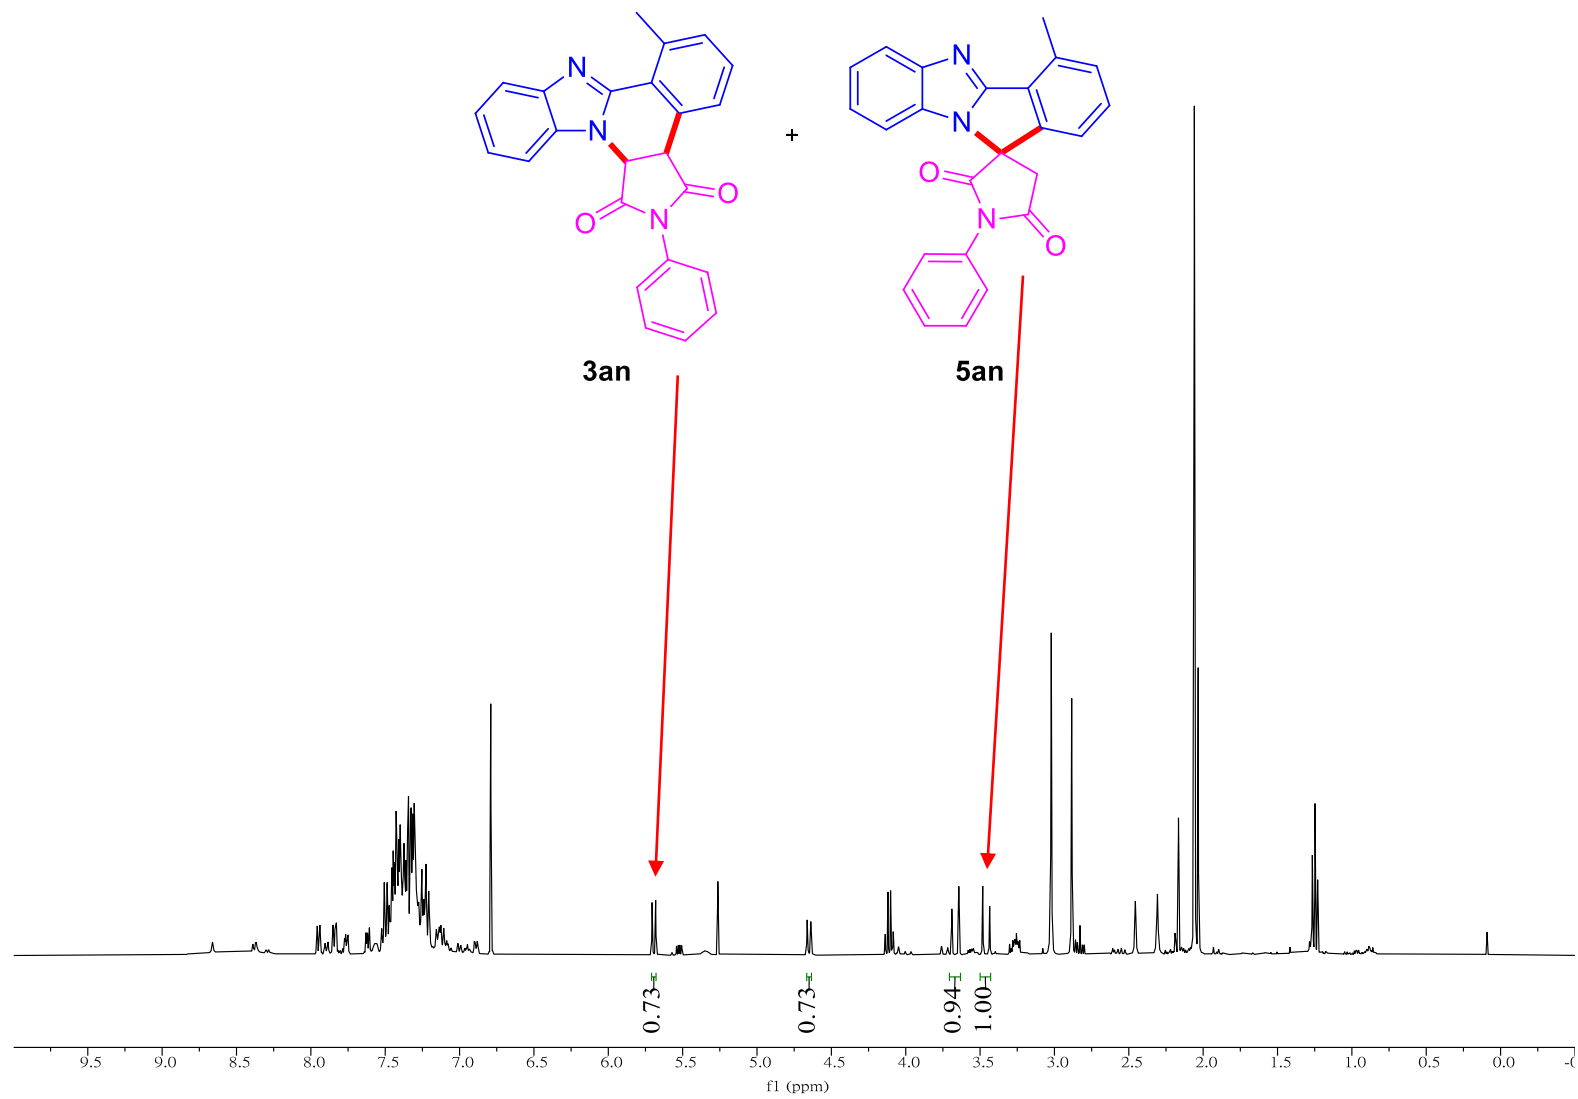

$^1\text{H}$  NMR spectrum (400 MHz) of compound **3an** and **5an** in  $\text{CDCl}_3$ .

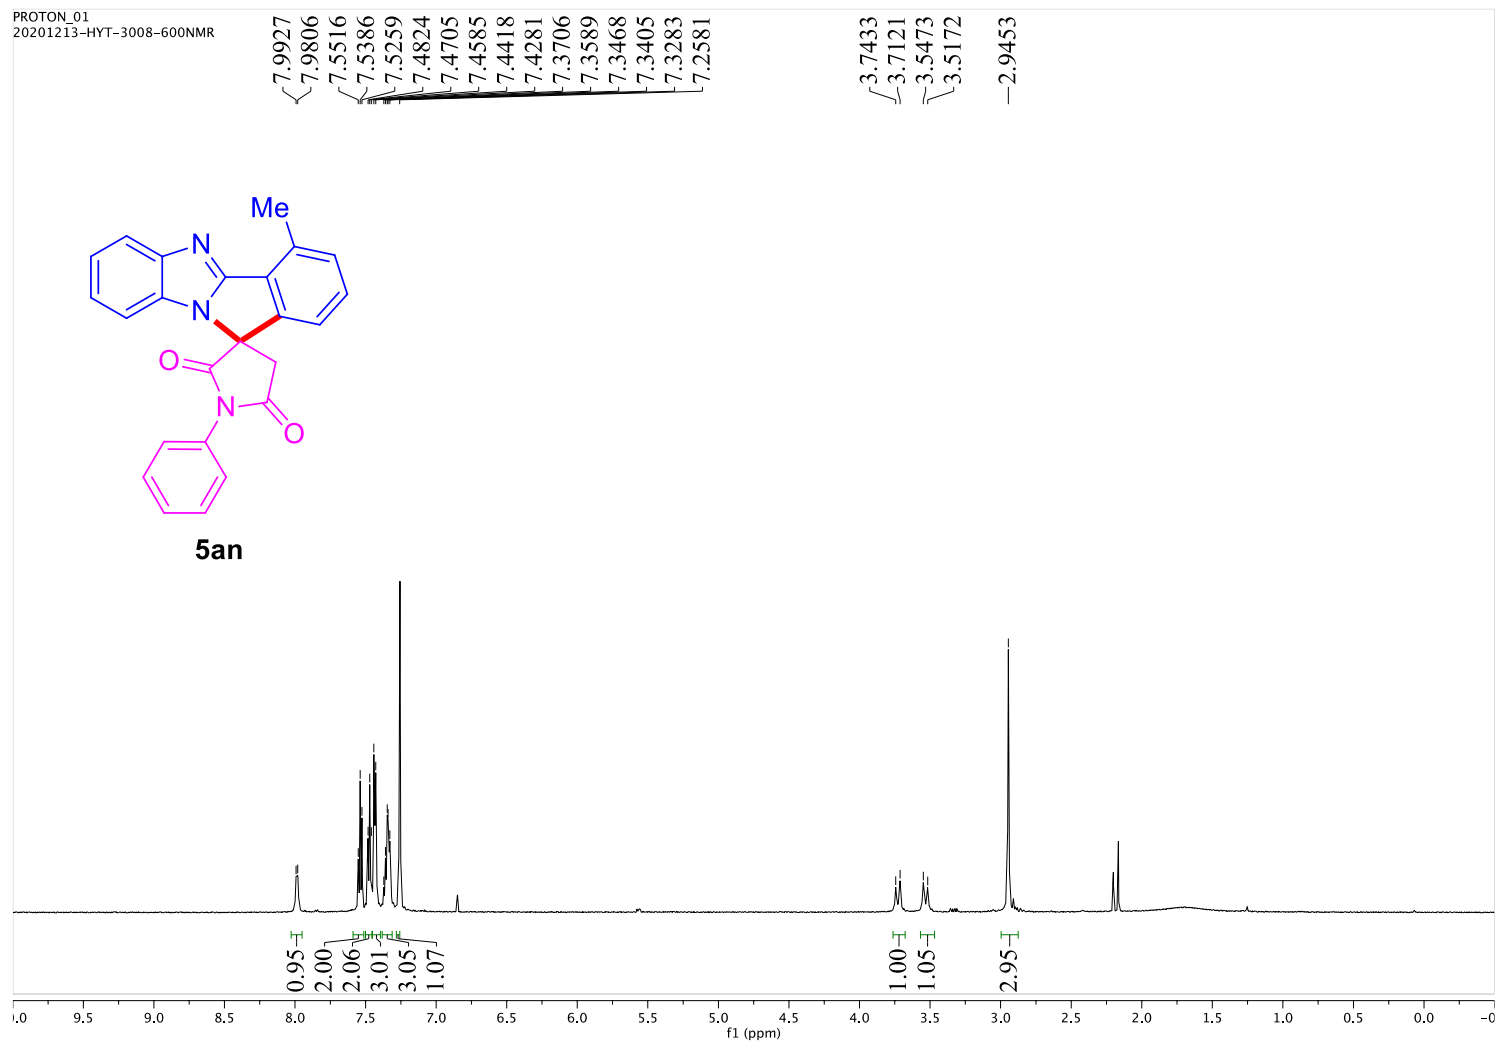

$^1\text{H}$  NMR spectrum (600 MHz) of compound **5an** in  $\text{CDCl}_3$ .

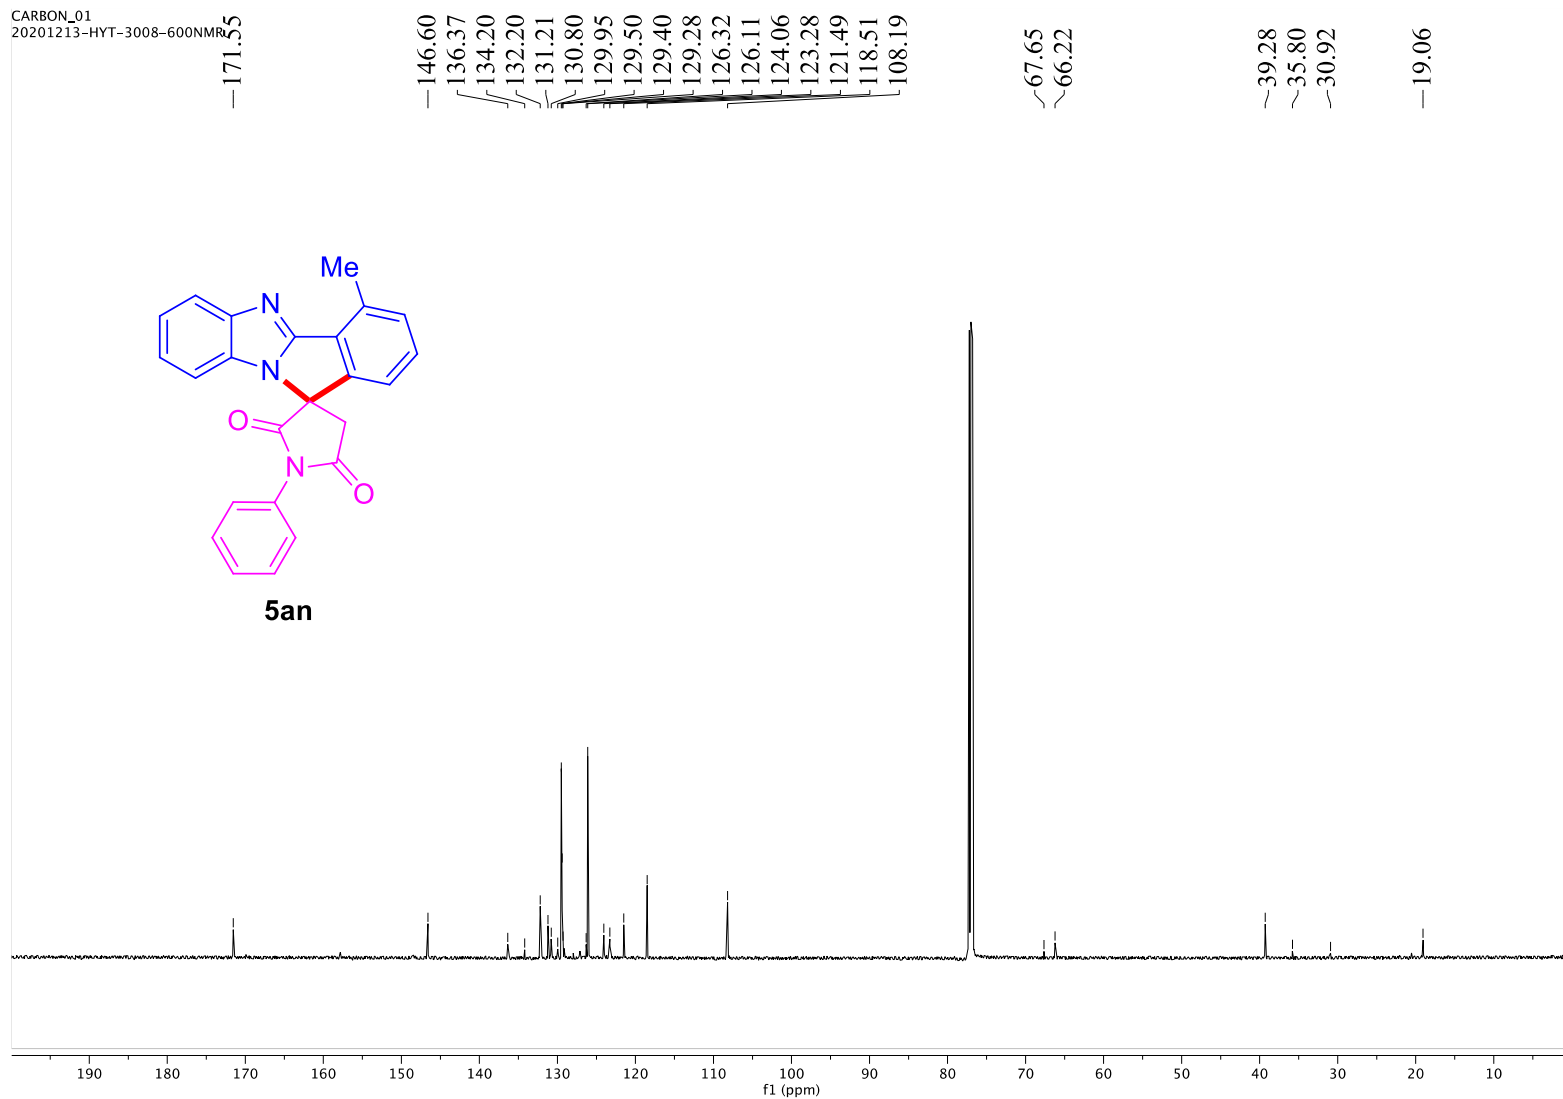

$^{13}\text{C}$  NMR spectrum (150 MHz) of compound **5an** in  $\text{CDCl}_3$ .

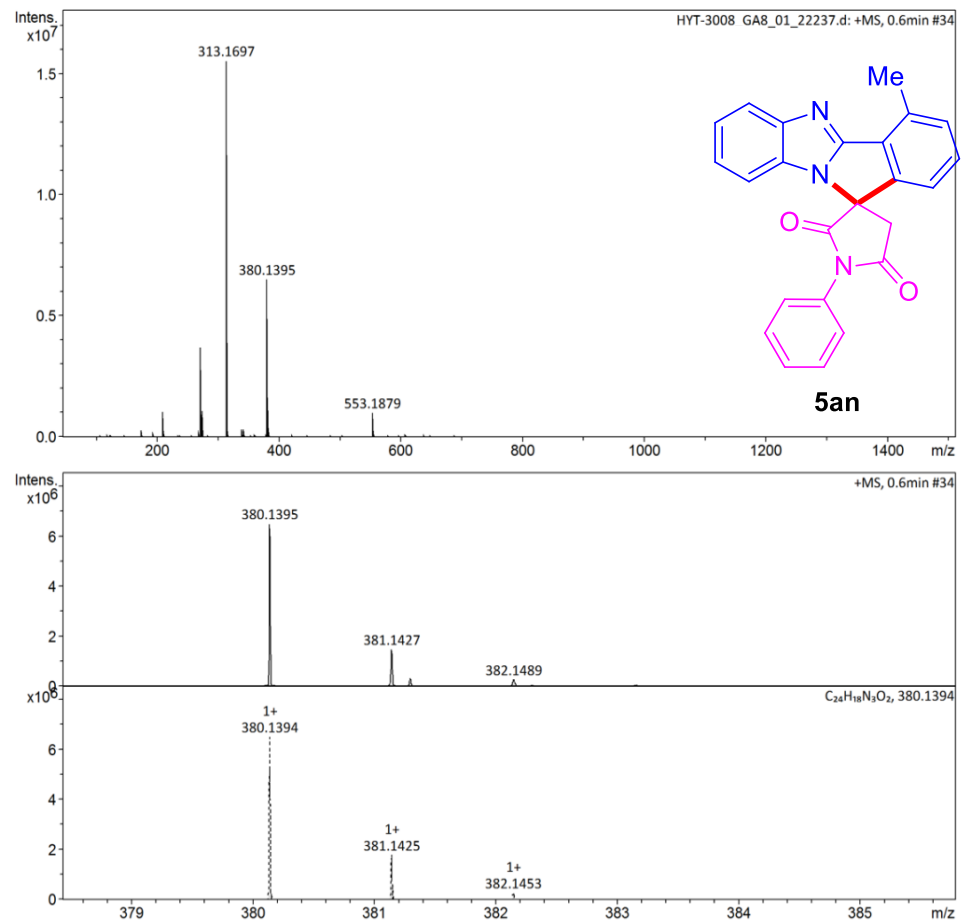

## Display Report

| Meas. m/z | # | Ion Formula                                                   | m/z      | err [ppm] | mSigma | # Sigma | Score  | rdb  | e <sup>-</sup> Conf | N-Rule | Adduct |
|-----------|---|---------------------------------------------------------------|----------|-----------|--------|---------|--------|------|---------------------|--------|--------|
| 380.1395  | 1 | C <sub>24</sub> H <sub>18</sub> N <sub>3</sub> O <sub>2</sub> | 380.1394 | -0.3      | 23.8   | 1       | 100.00 | 17.5 | even                | ok     | M+H    |

HRMS (ESI) of compound **5an**.

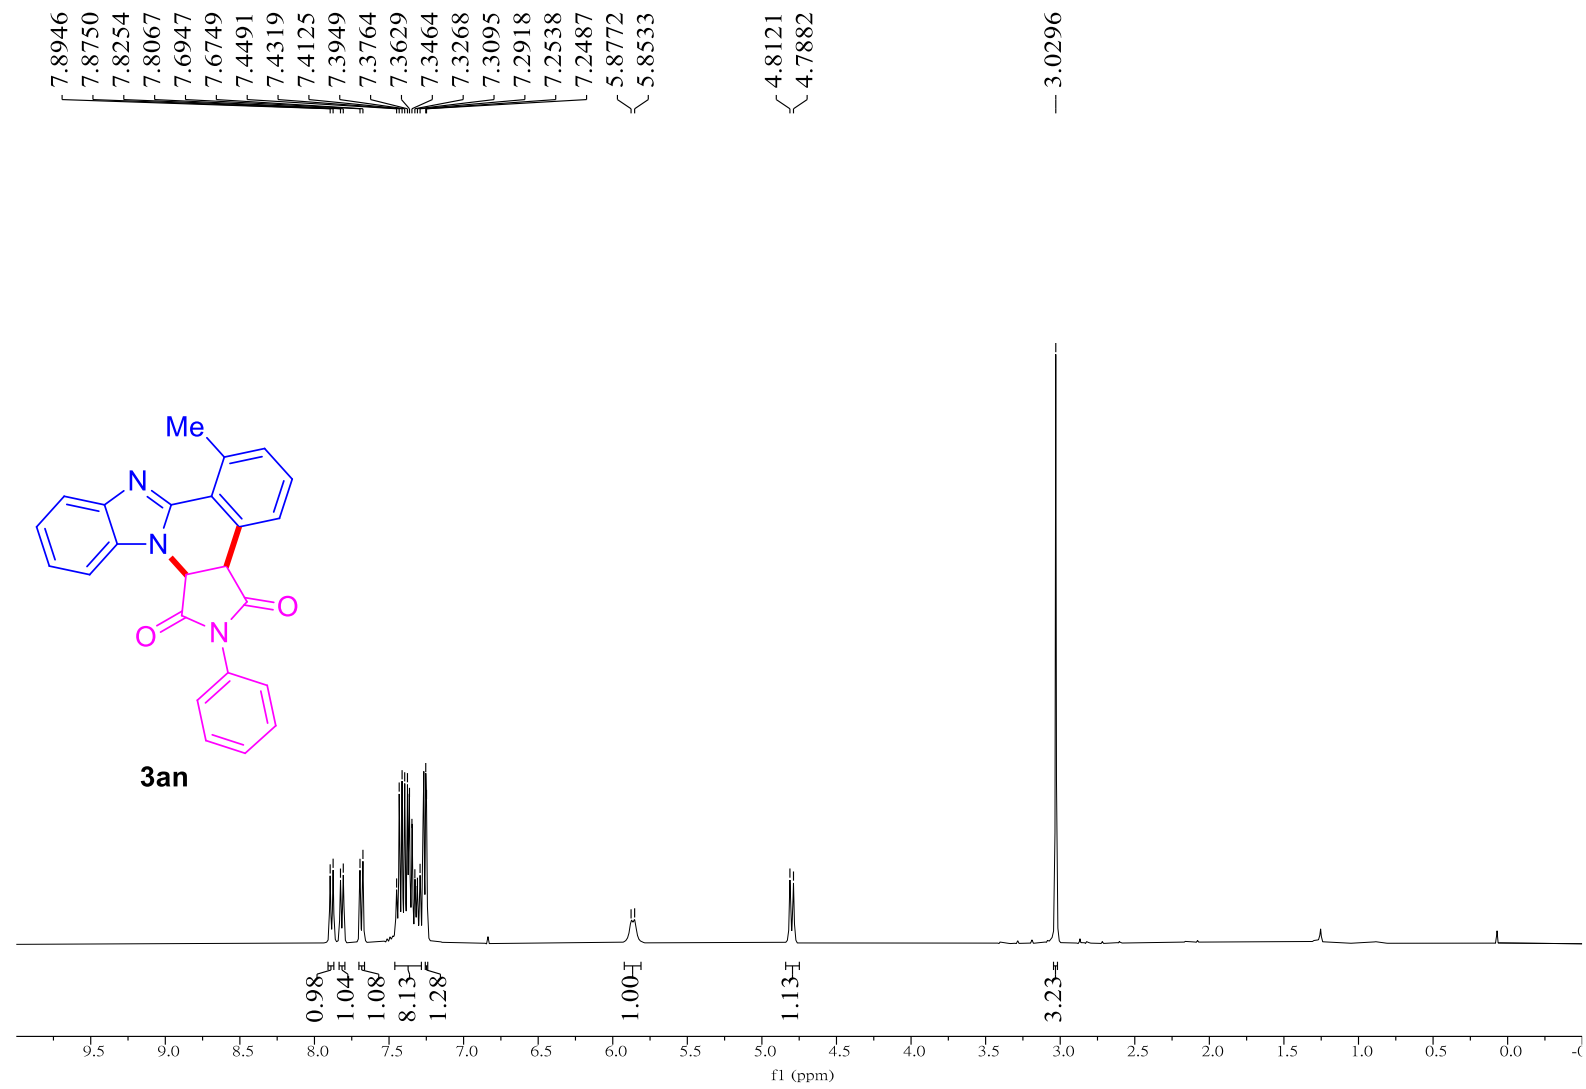

<sup>1</sup>H NMR spectrum (400 MHz) of compound **3an** in CDCl<sub>3</sub>.

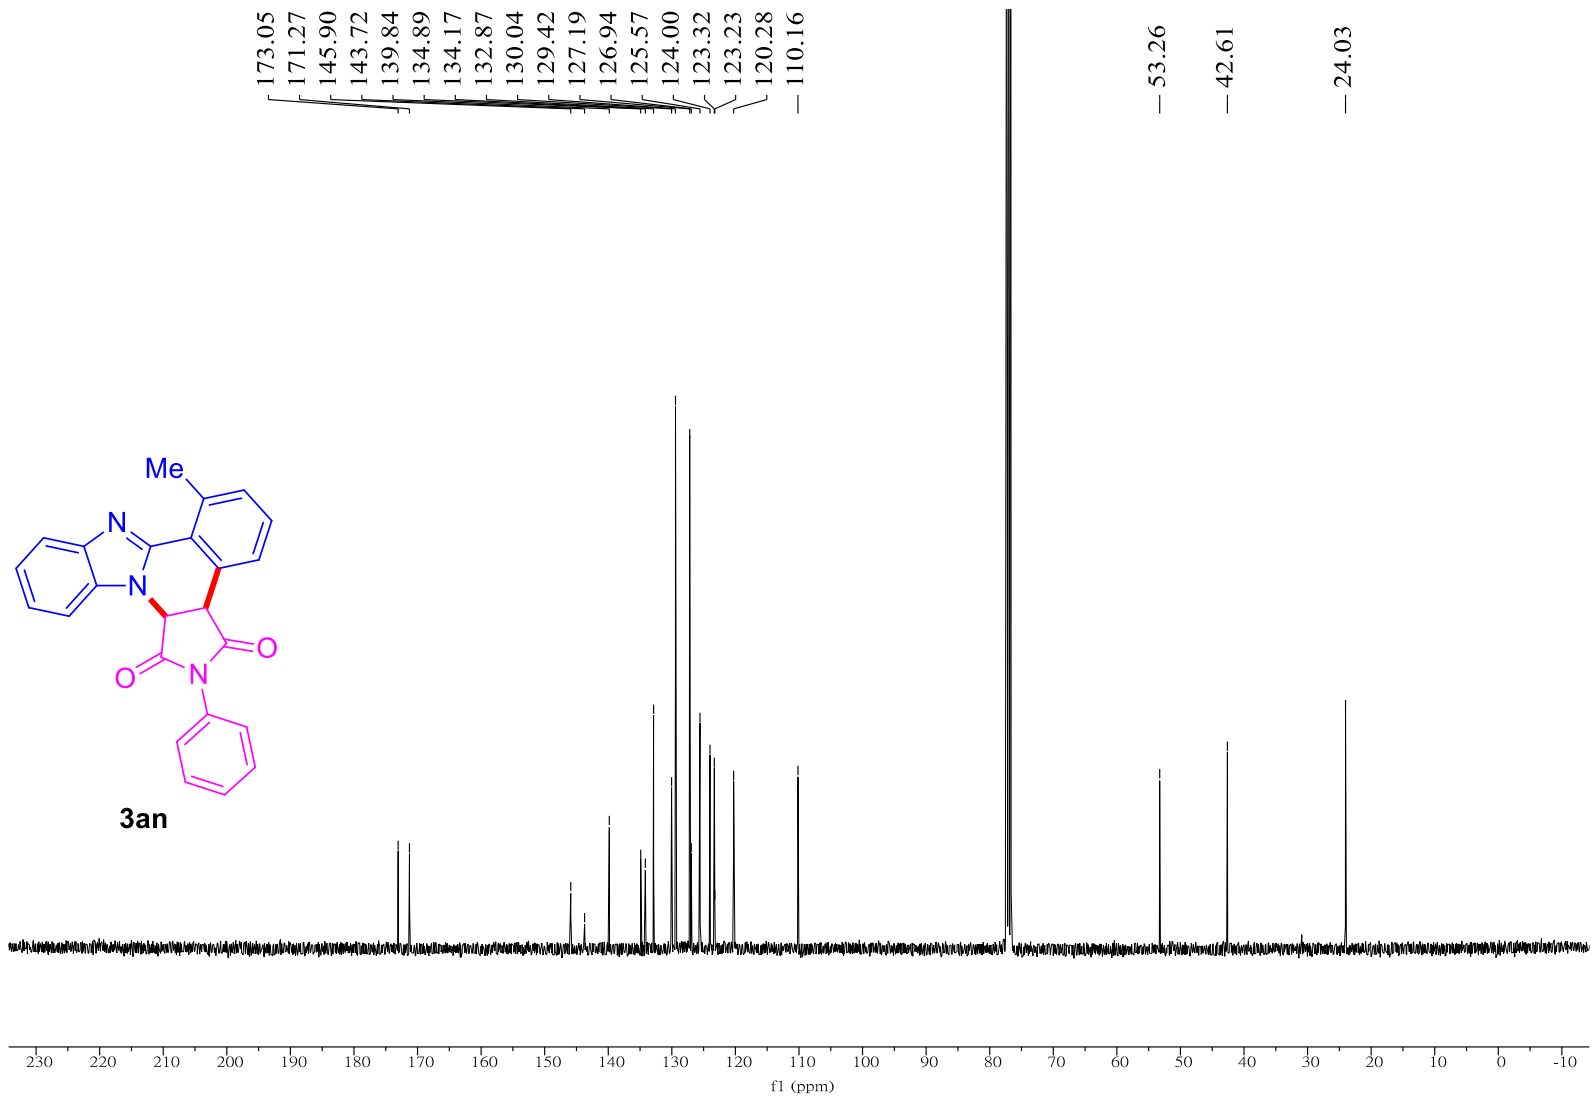

$^{13}\text{C}$  NMR spectrum (100 MHz) of compound **3an** in  $\text{CDCl}_3$ .



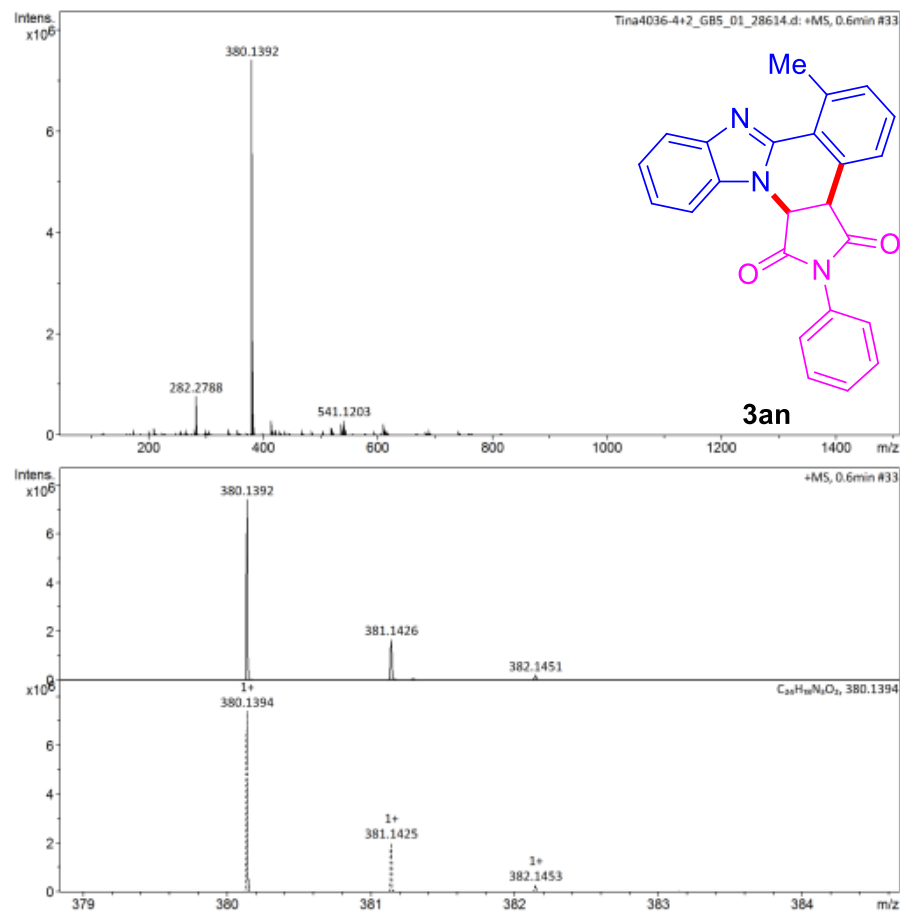

### Display Report

| Meas. m/z | # | Ion Formula                                                   | m/z      | err [ppm] | mSigma | # Sigma | Score  | rdb  | e <sup>-</sup> Conf | N-Rule | Adduct |
|-----------|---|---------------------------------------------------------------|----------|-----------|--------|---------|--------|------|---------------------|--------|--------|
| 380.1392  | 1 | C <sub>24</sub> H <sub>18</sub> N <sub>3</sub> O <sub>2</sub> | 380.1394 | 0.4       | 24.3   | 1       | 100.00 | 17.5 | even                | ok     | M+H    |

HRMS (ESI) of compound **3an**.

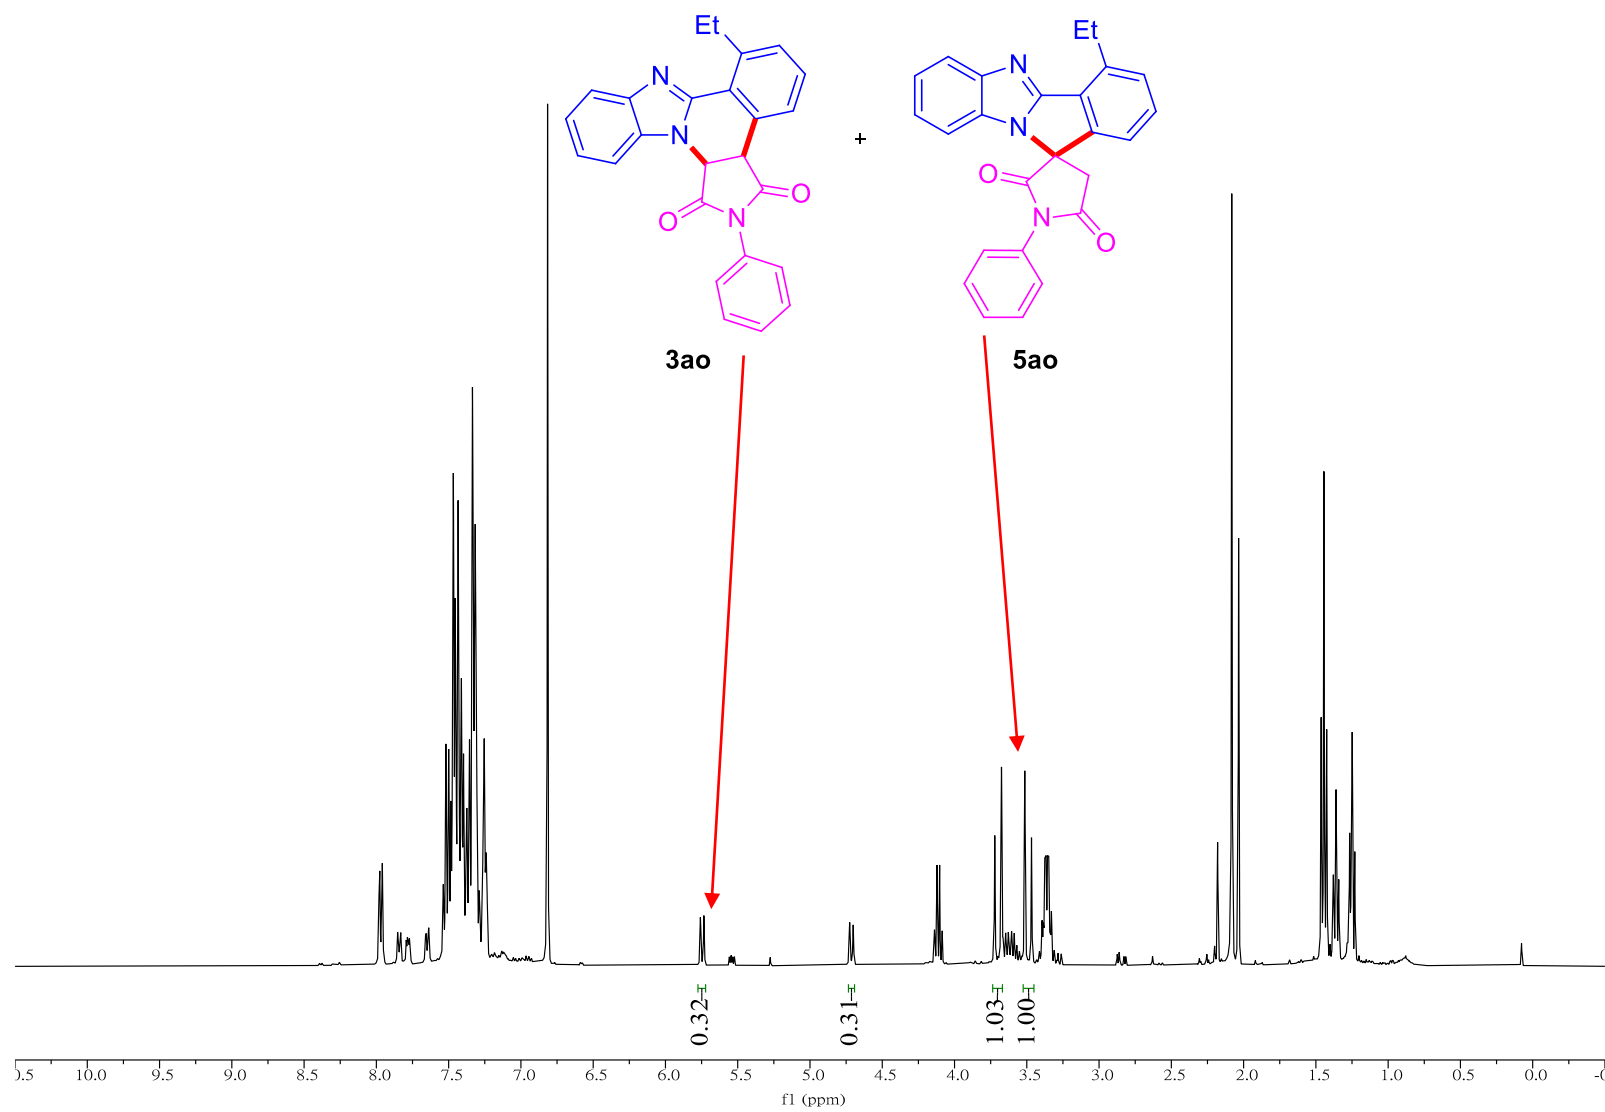

$^1\text{H}$  NMR spectrum (400 MHz) of compound **3ao** and **5ao** in  $\text{CDCl}_3$ .

PROTON\_01  
20210325-HYT-5025-600NMR

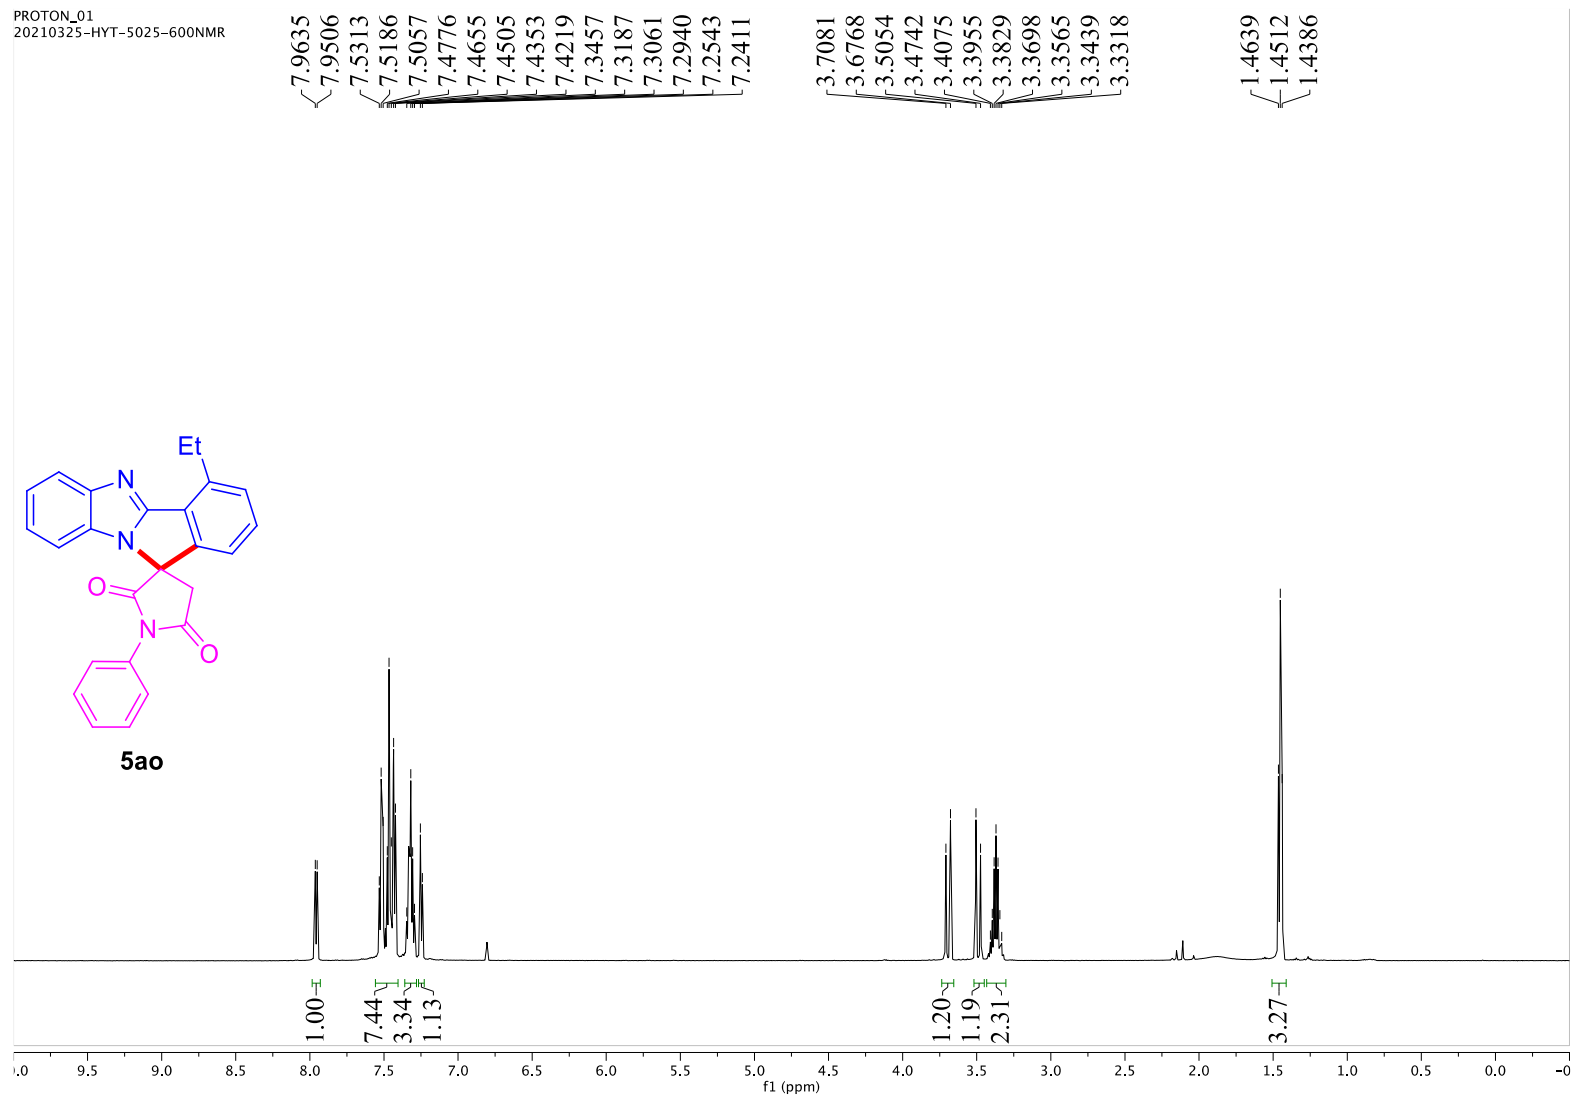

<sup>1</sup>H NMR spectrum (600 MHz) of compound **5ao** in CDCl<sub>3</sub>.

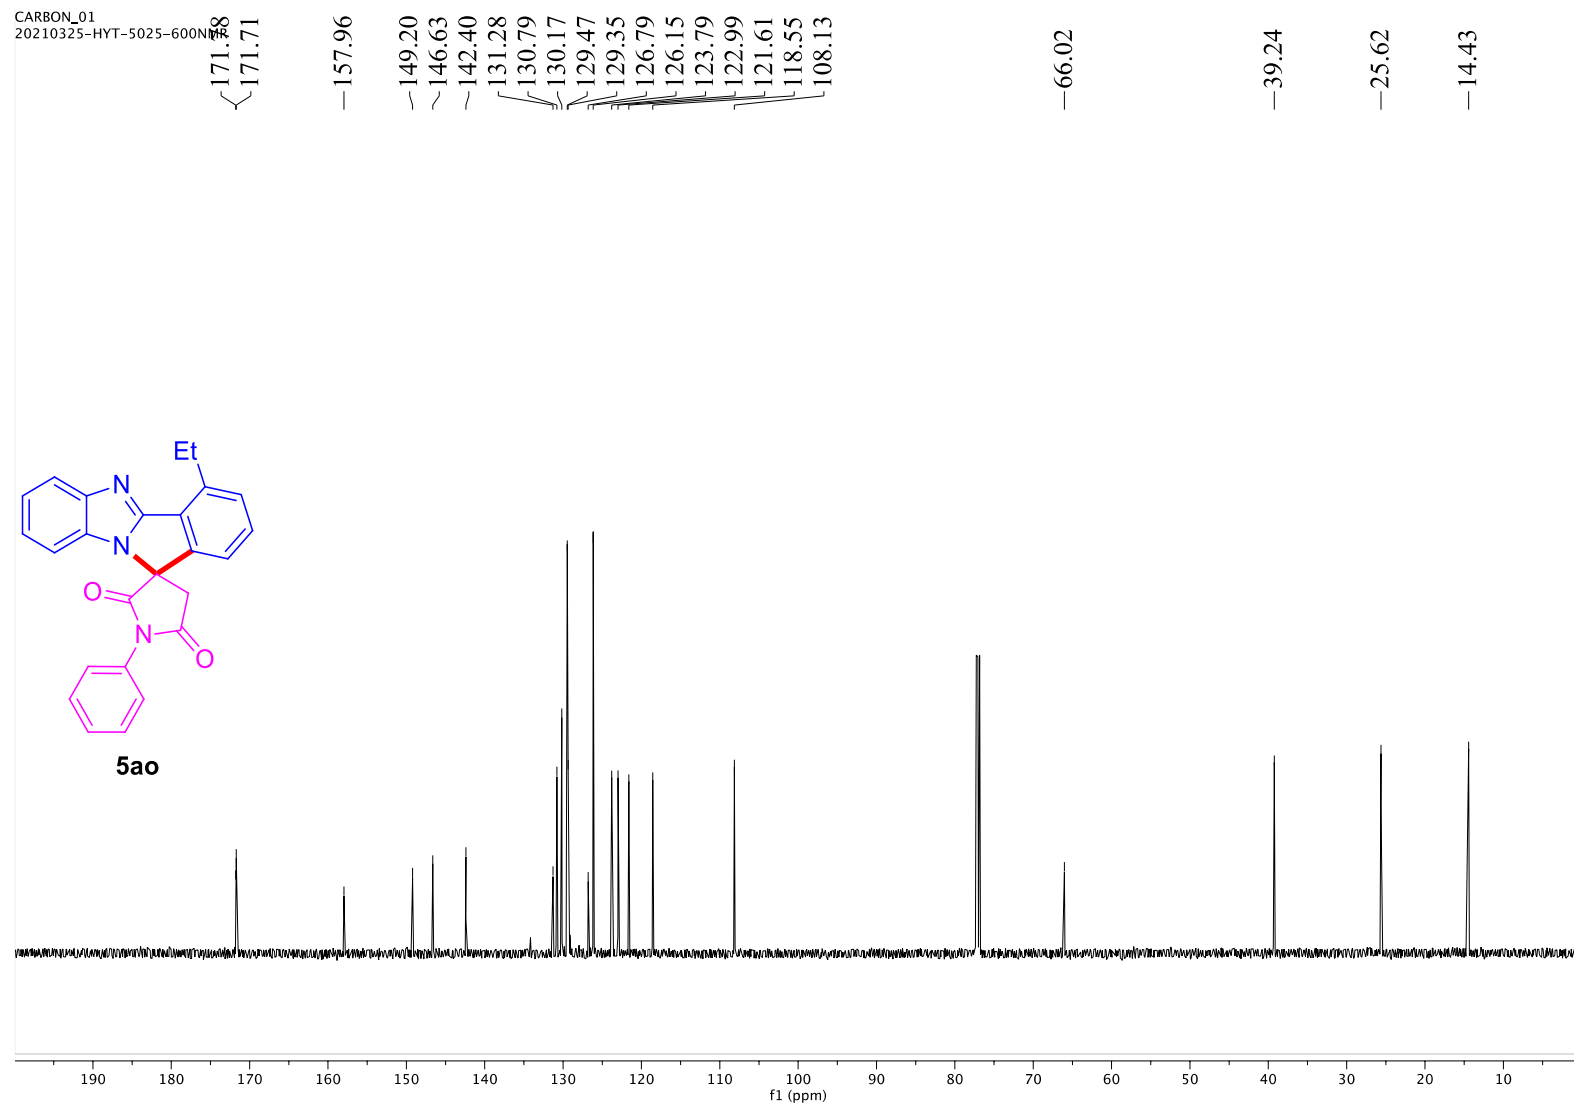

$^{13}\text{C}$  NMR spectrum (150 MHz) of compound **5ao** in  $\text{CDCl}_3$ .

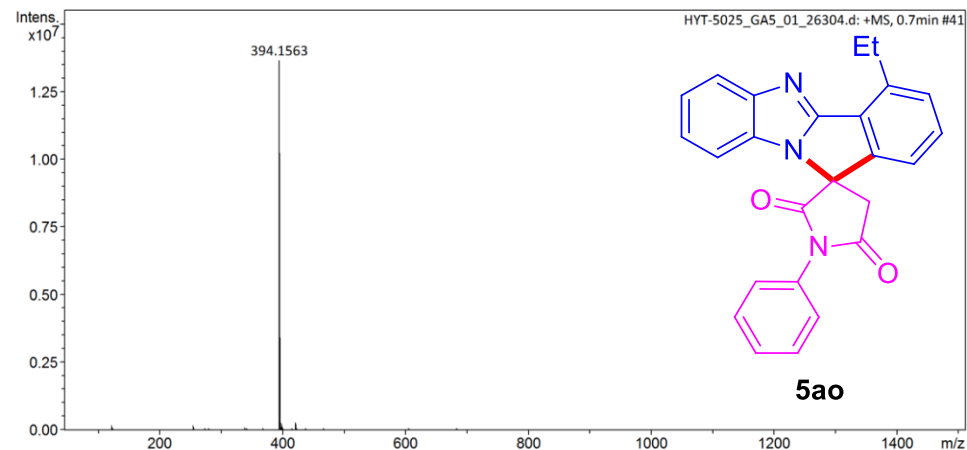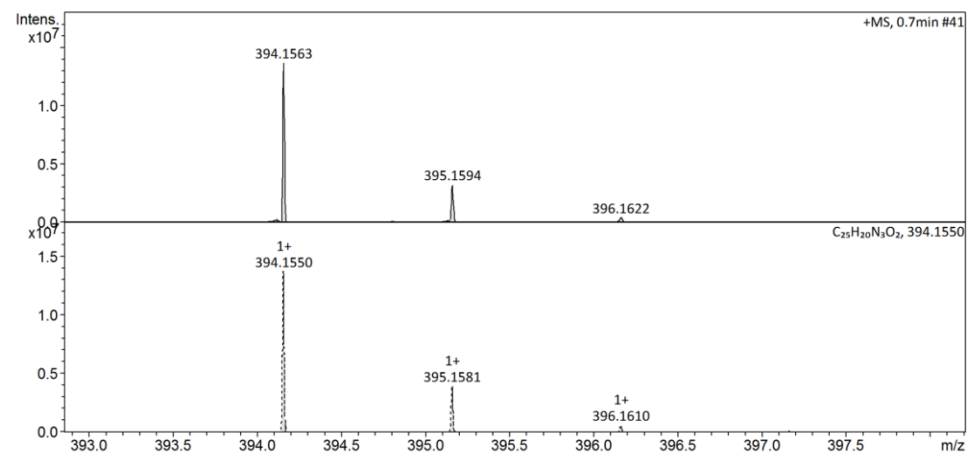

### Display Report

| Meas. m/z | # | Ion Formula                                                   | m/z      | err [ppm] | mSigma | # Sigma | Score  | rdb  | e <sup>-</sup> Conf | N-Rule | Adduct |
|-----------|---|---------------------------------------------------------------|----------|-----------|--------|---------|--------|------|---------------------|--------|--------|
| 394.1563  | 1 | C <sub>25</sub> H <sub>20</sub> N <sub>3</sub> O <sub>2</sub> | 394.1550 | -3.2      | 25.6   | 1       | 100.00 | 17.5 | even                | ok     | M+H    |

HRMS (ESI) of compound **5ao**.

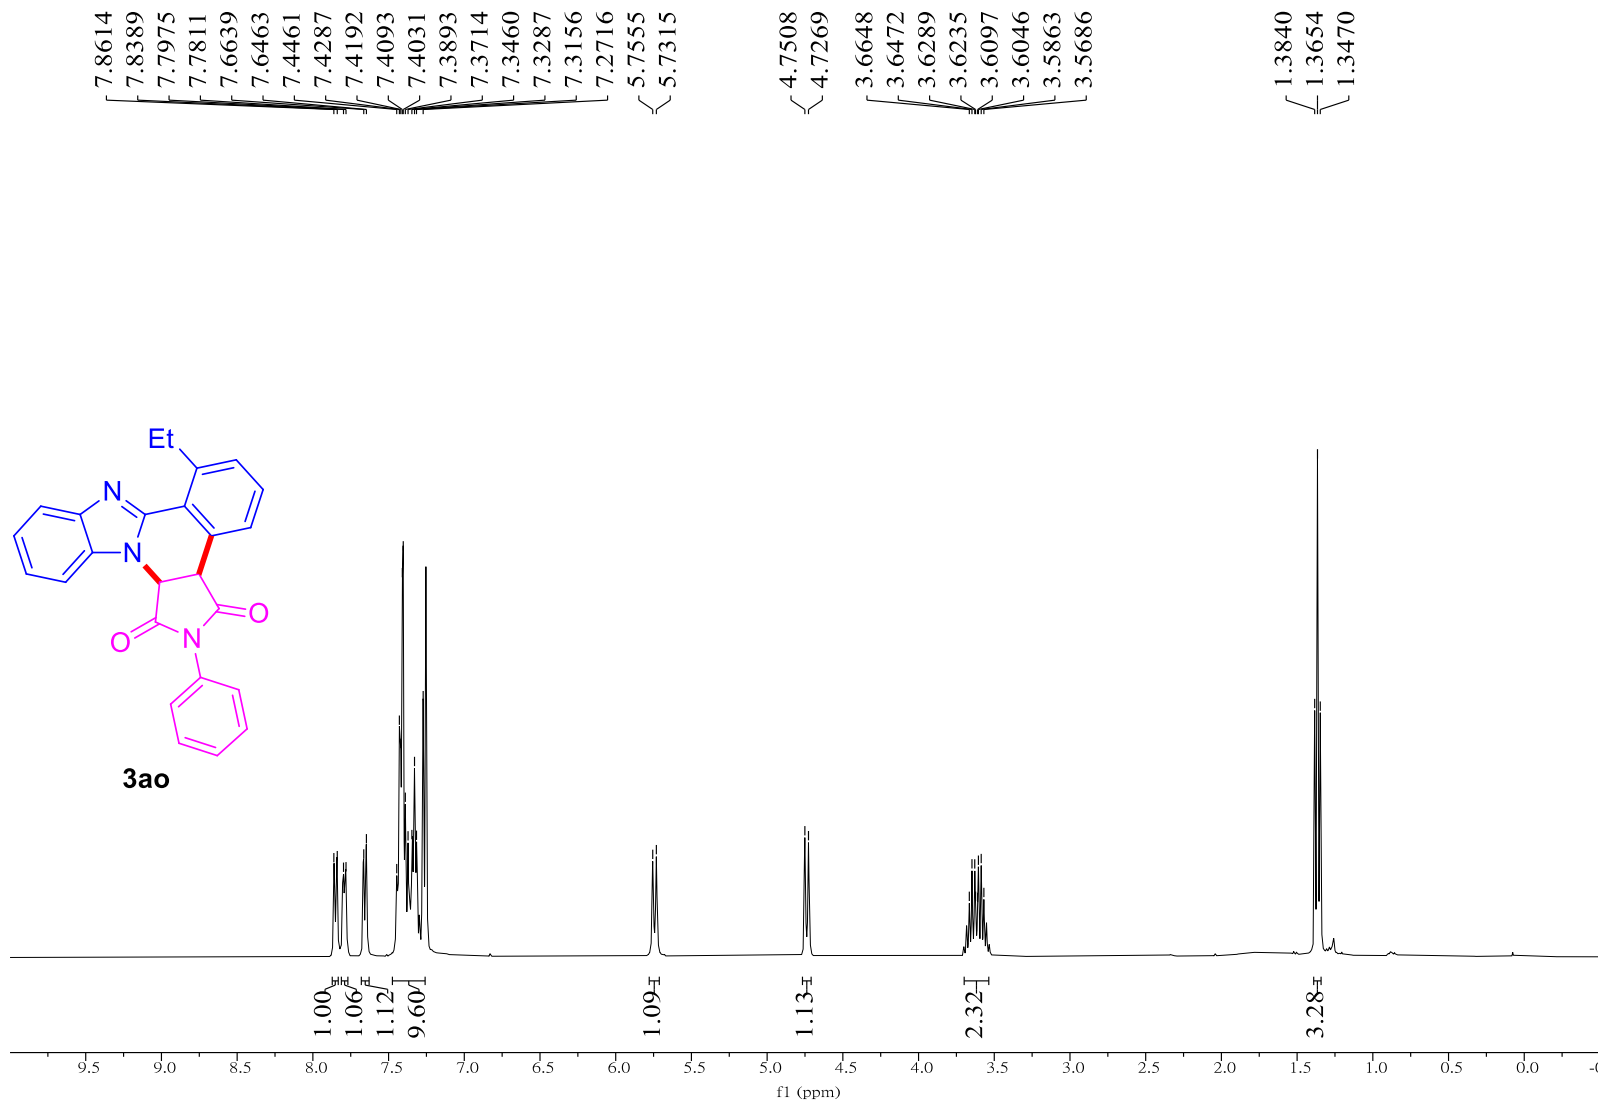

$^1\text{H}$  NMR spectrum (400 MHz) of compound **3ao** in  $\text{CDCl}_3$ .

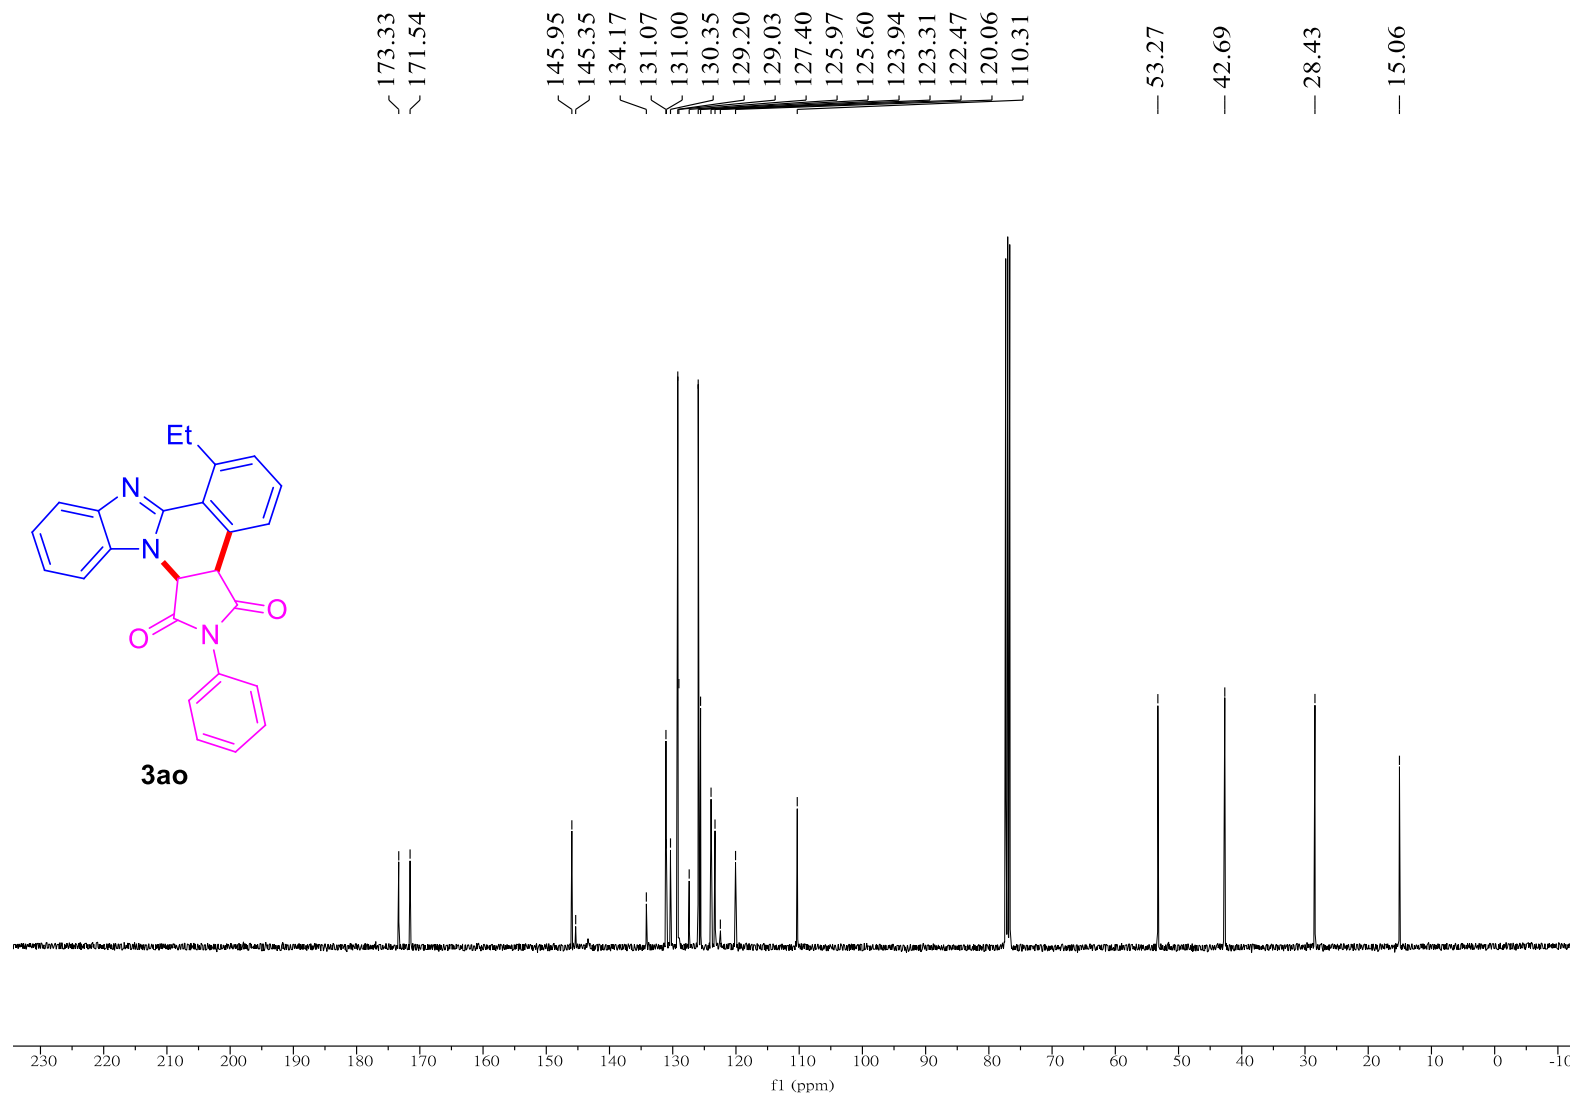

<sup>13</sup>C NMR spectrum (100 MHz) of compound **3ao** in CDCl<sub>3</sub>.

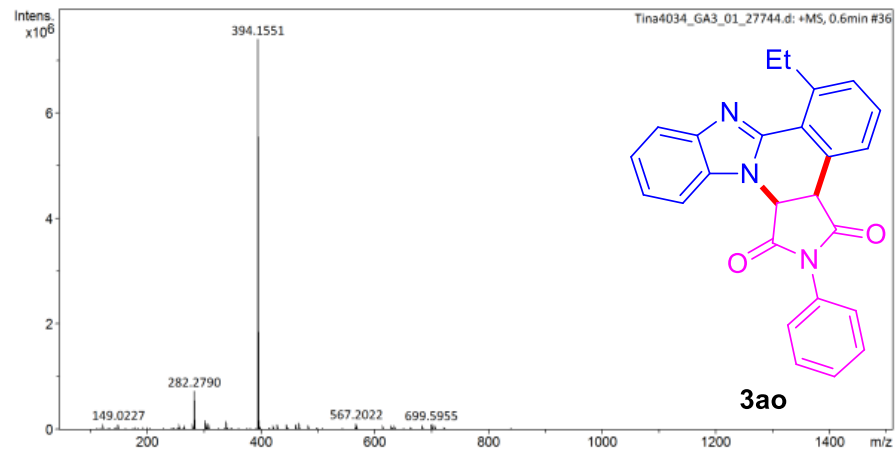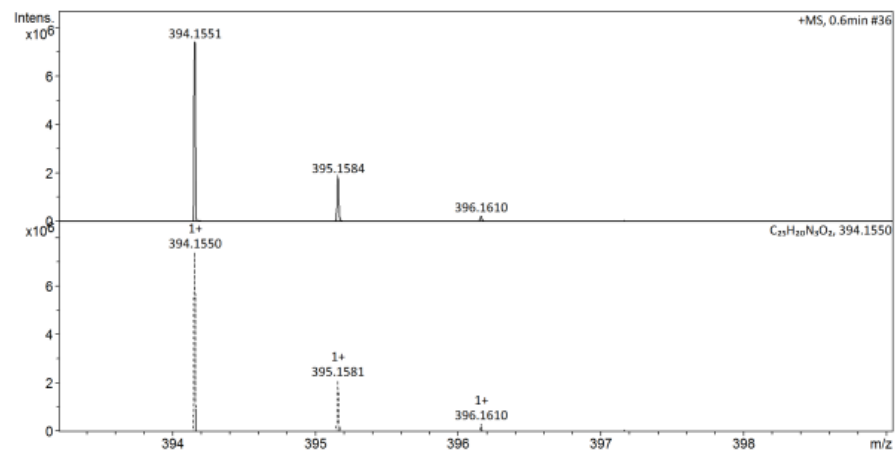

### Display Report

| Meas. m/z | # | Ion Formula                                                   | m/z      | err [ppm] | mSigma | # Sigma | Score  | rdb  | e <sup>-</sup> Conf | N-Rule | Adduct |
|-----------|---|---------------------------------------------------------------|----------|-----------|--------|---------|--------|------|---------------------|--------|--------|
| 394.1551  | 1 | C <sub>25</sub> H <sub>20</sub> N <sub>3</sub> O <sub>2</sub> | 394.1550 | 0.2       | 19.7   | 1       | 100.00 | 17.5 | even                | ok     | M+H    |

HRMS (ESI) of compound **3ao**.



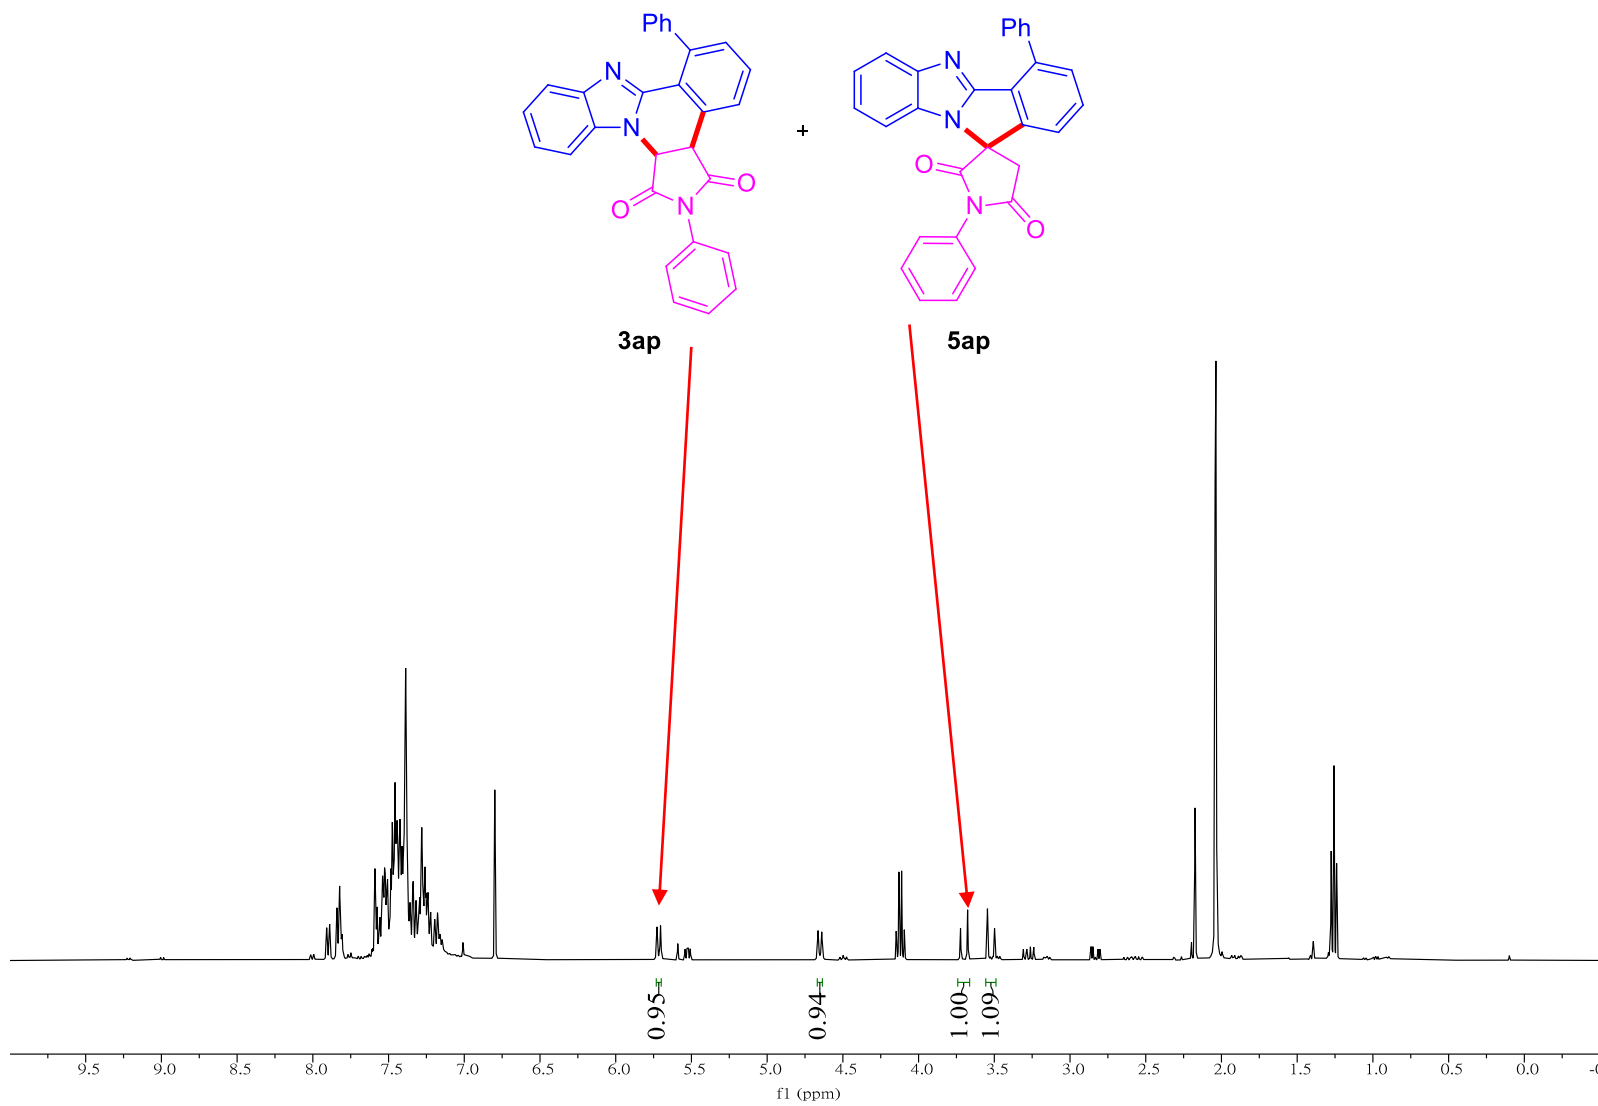

$^1\text{H}$  NMR spectrum (400 MHz) of compound **3ap** and **5ap** in  $\text{CDCl}_3$

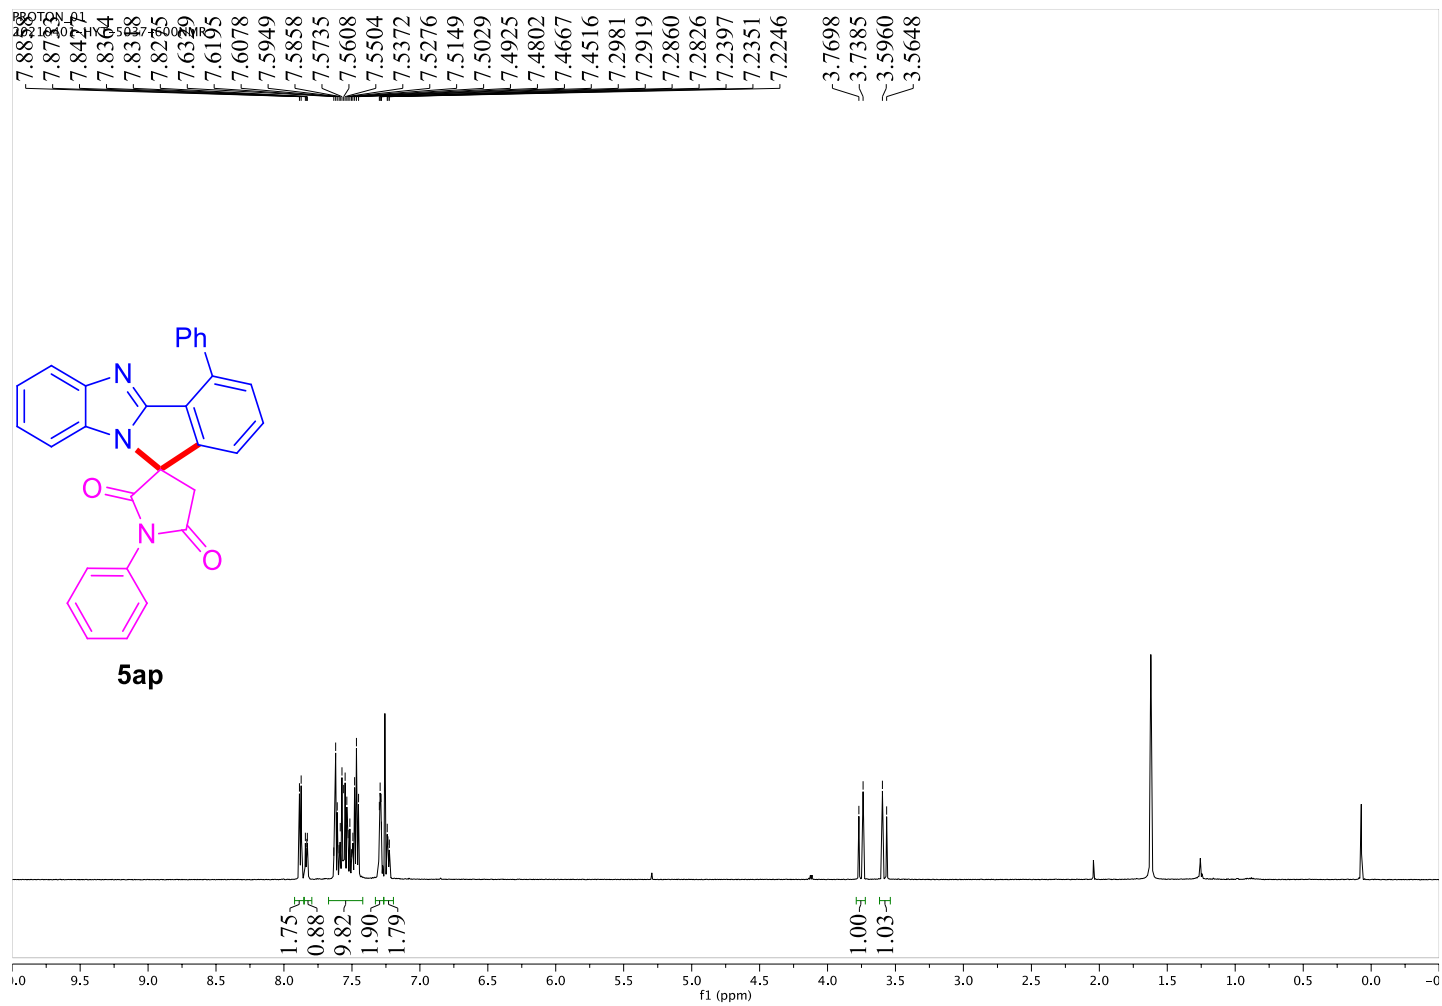

<sup>1</sup>H NMR spectrum (600 MHz) of compound **5ap** in CDCl<sub>3</sub>.

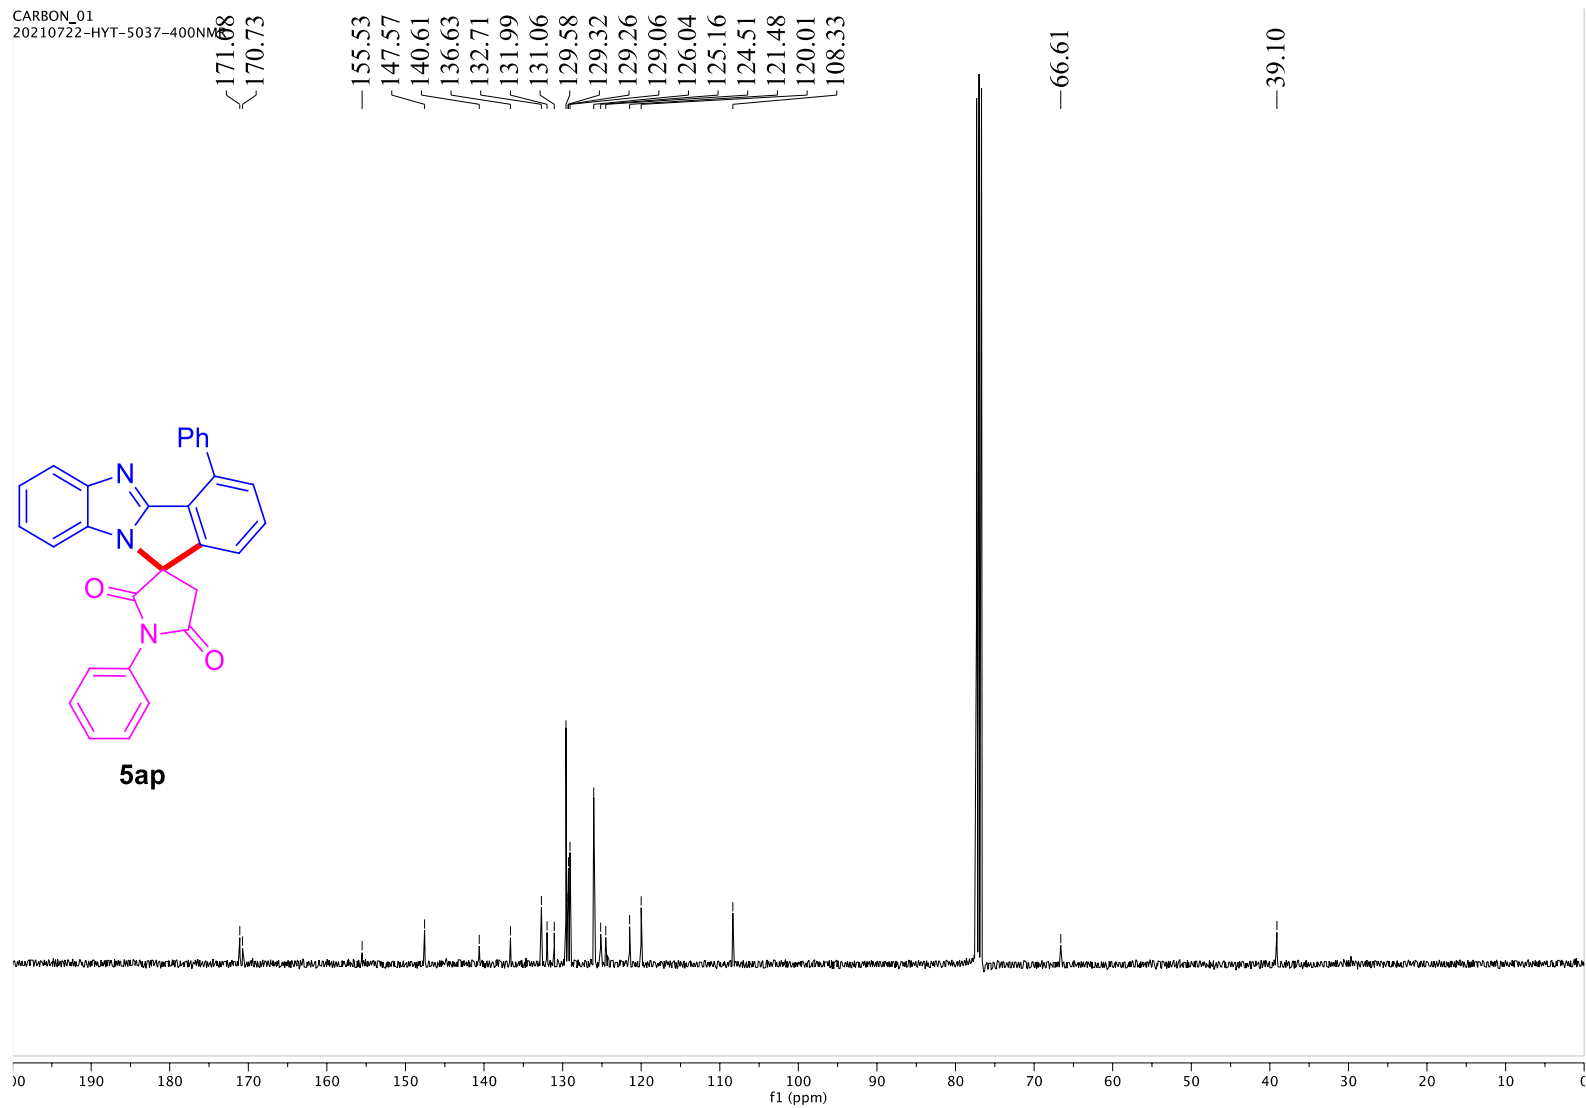

$^{13}\text{C}$  NMR spectrum (150 MHz) of compound **5ap** in  $\text{CDCl}_3$ .

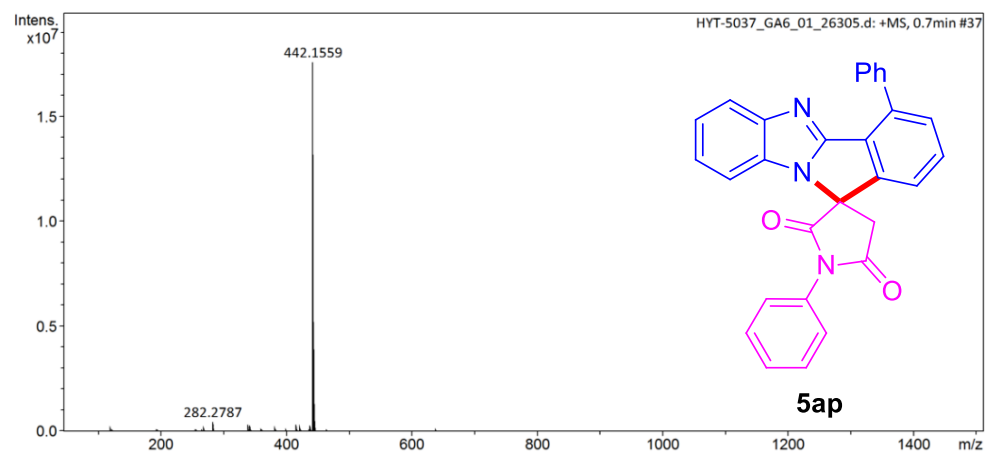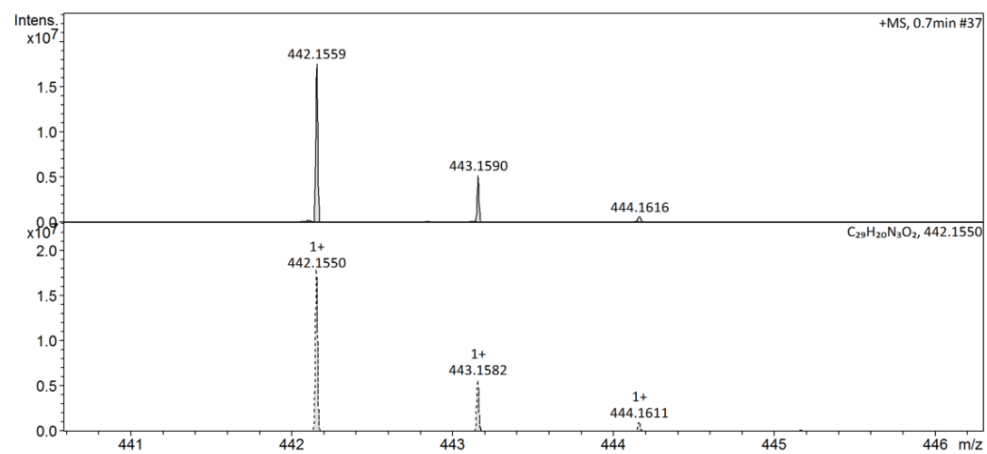

## Display Report

| Meas. m/z | # | Ion Formula                                                   | m/z      | err [ppm] | mSigma | # Sigma | Score  | rdb  | e <sup>-</sup> Conf | N-Rule | Adduct |
|-----------|---|---------------------------------------------------------------|----------|-----------|--------|---------|--------|------|---------------------|--------|--------|
| 442.1559  | 1 | C <sub>29</sub> H <sub>20</sub> N <sub>3</sub> O <sub>2</sub> | 442.1550 | -2.0      | 18.2   | 1       | 100.00 | 21.5 | even                | ok     | M+H    |

HRMS (ESI) of compound **5ap**.

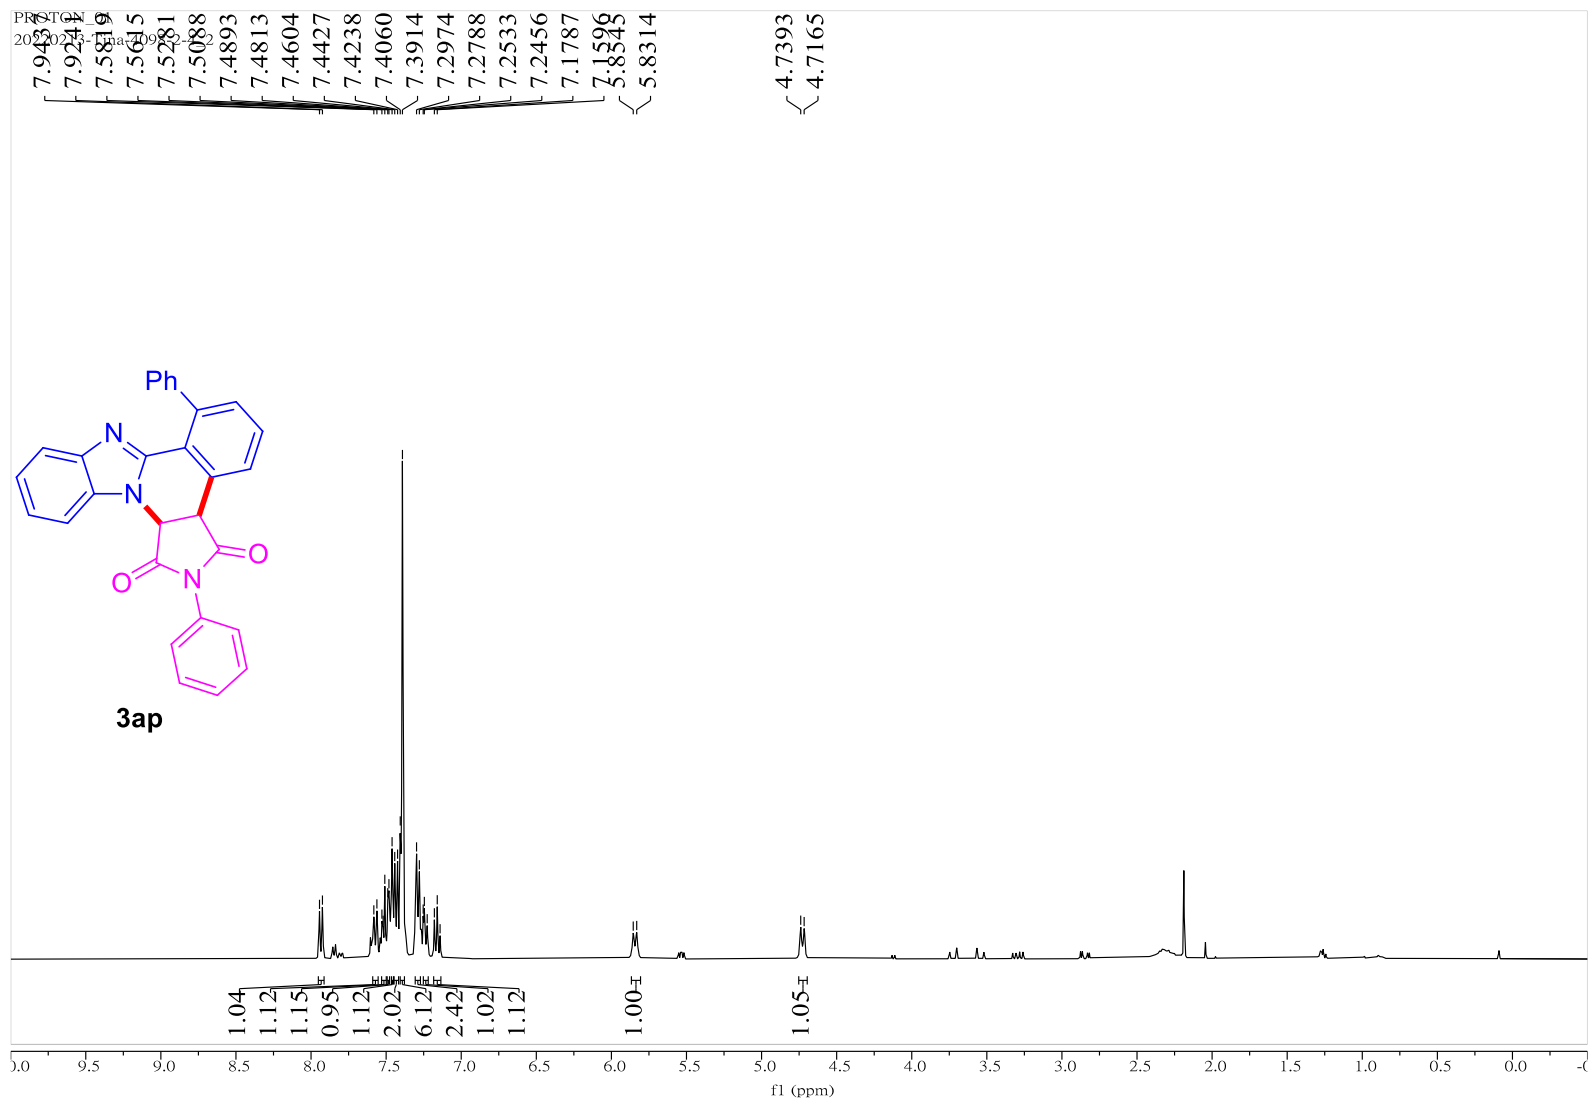

$^1\text{H}$  NMR spectrum (600 MHz) of compound **3ap** in  $\text{CDCl}_3$ .

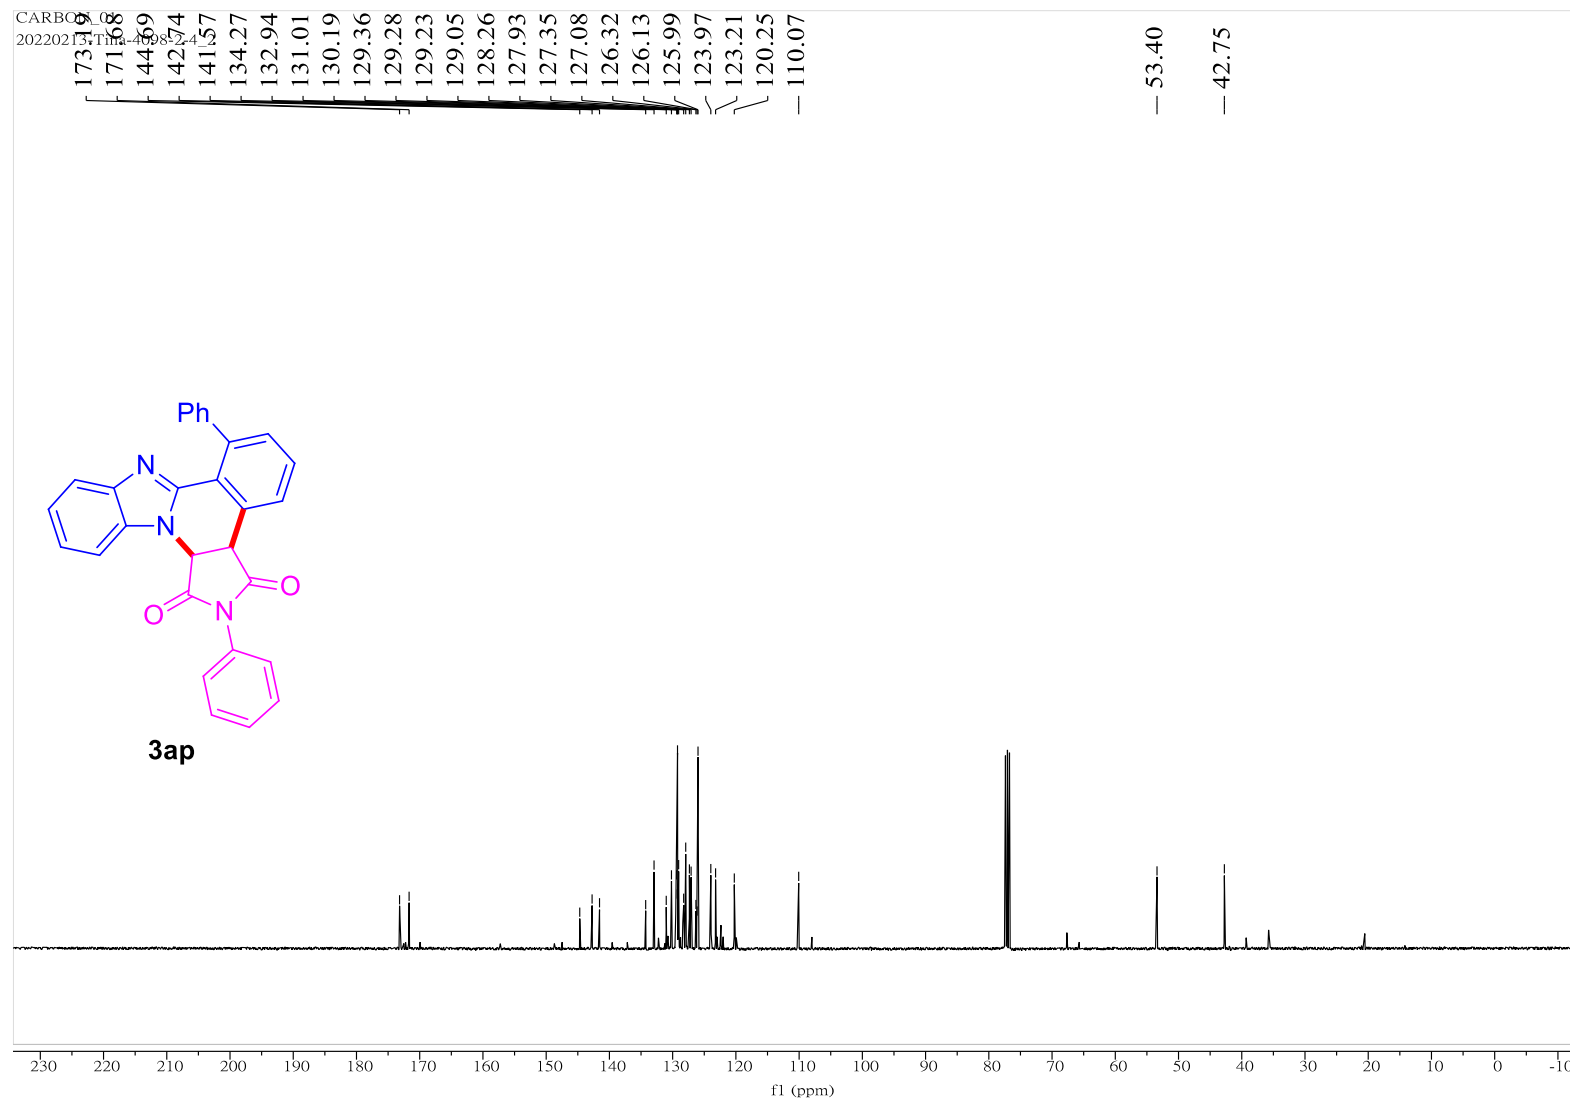

$^{13}\text{C}$  NMR spectrum (150 MHz) of compound **3ap** in  $\text{CDCl}_3$ .

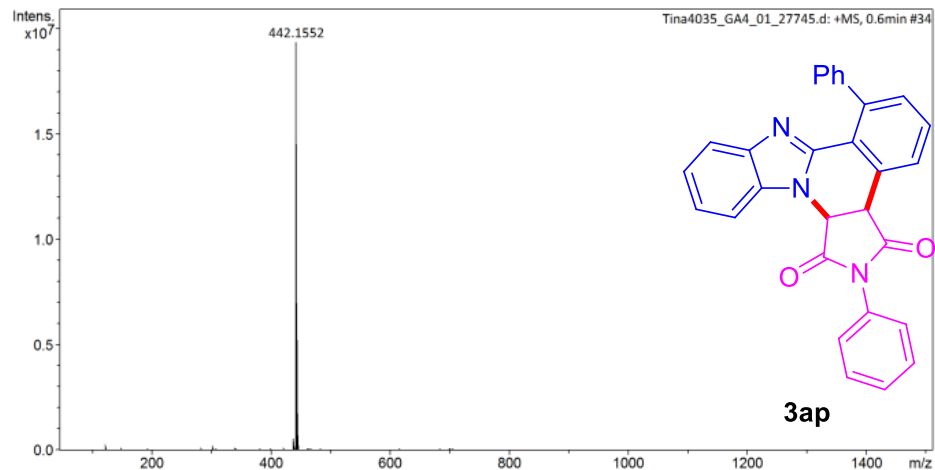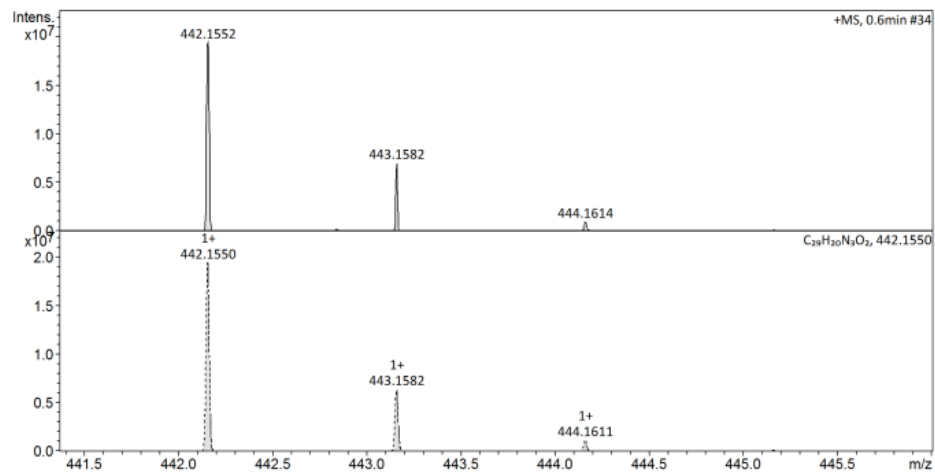

### Display Report

| Meas. m/z | # | Ion Formula                                                   | m/z      | err [ppm] | mSigma | # Sigma | Score  | rdb  | e <sup>-</sup> Conf | N-Rule | Adduct |
|-----------|---|---------------------------------------------------------------|----------|-----------|--------|---------|--------|------|---------------------|--------|--------|
| 442.1552  | 1 | C <sub>29</sub> H <sub>20</sub> N <sub>3</sub> O <sub>2</sub> | 442.1550 | 0.4       | 16.9   | 1       | 100.00 | 21.5 | even                | ok     | M+H    |

HRMS (ESI) of compound **3ap**.

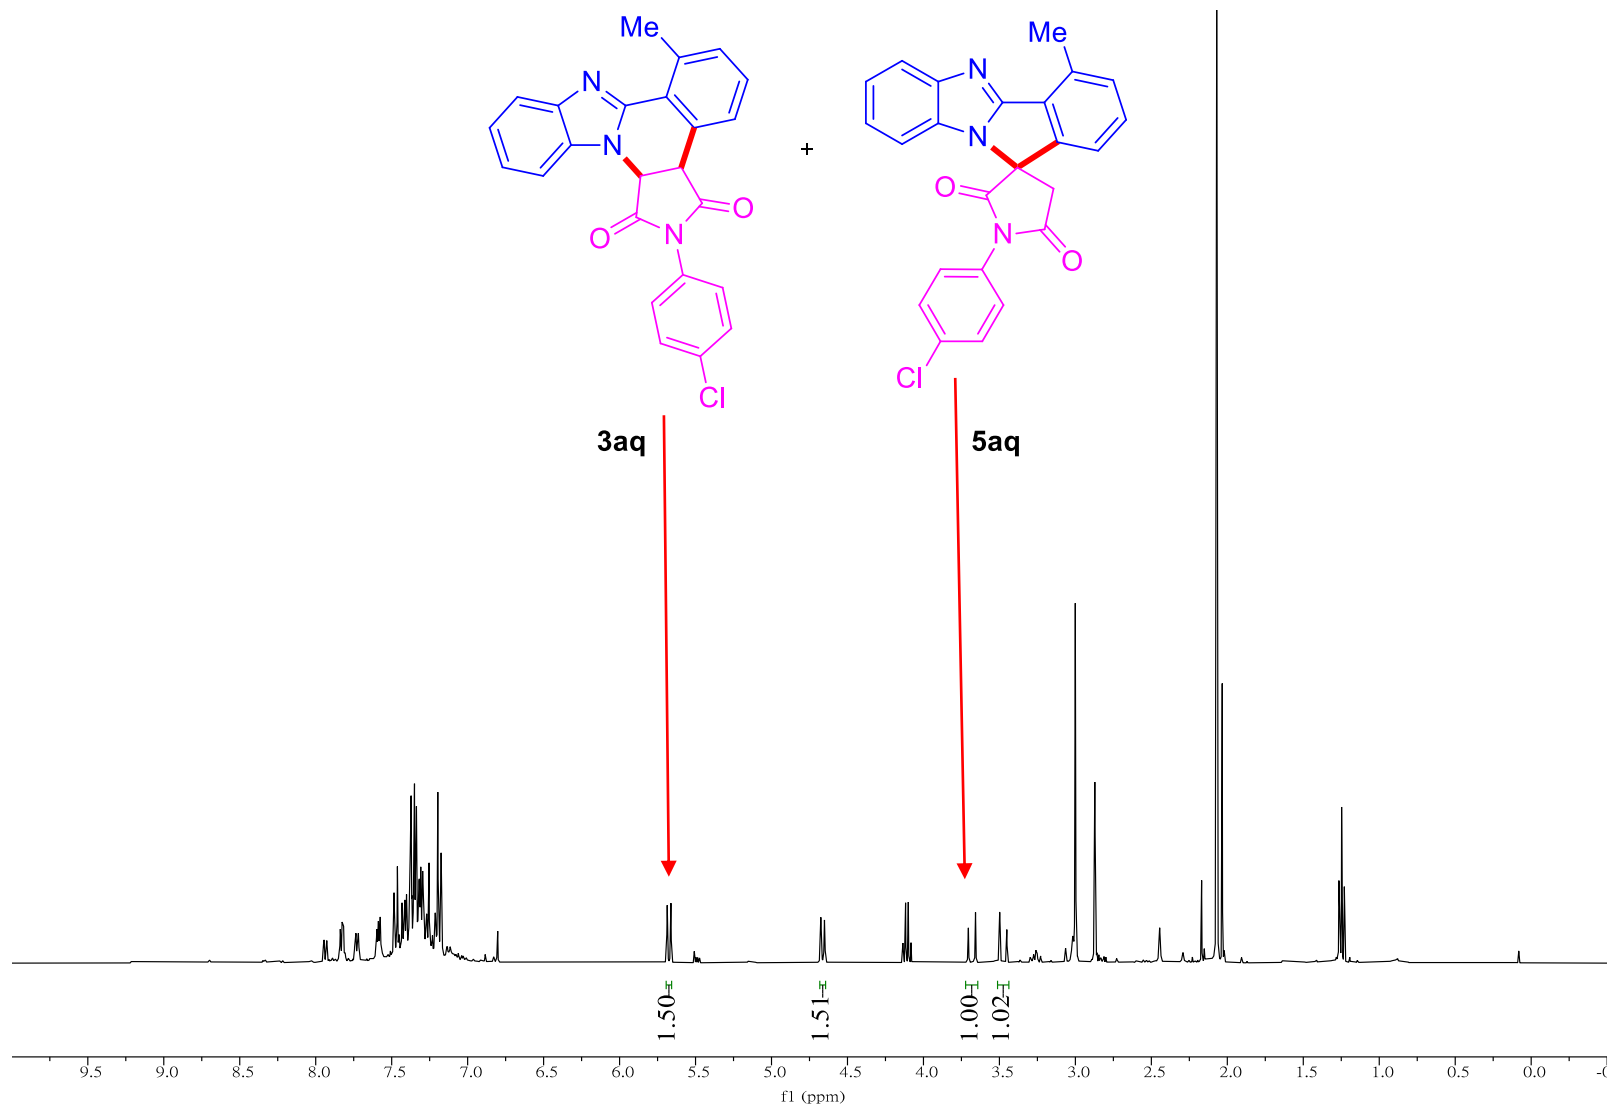

$^1\text{H}$  NMR spectrum (400 MHz) of compound **3aq** and **5aq** in  $\text{CDCl}_3$ .



PROTON\_01  
20201115-HYT-3015-data

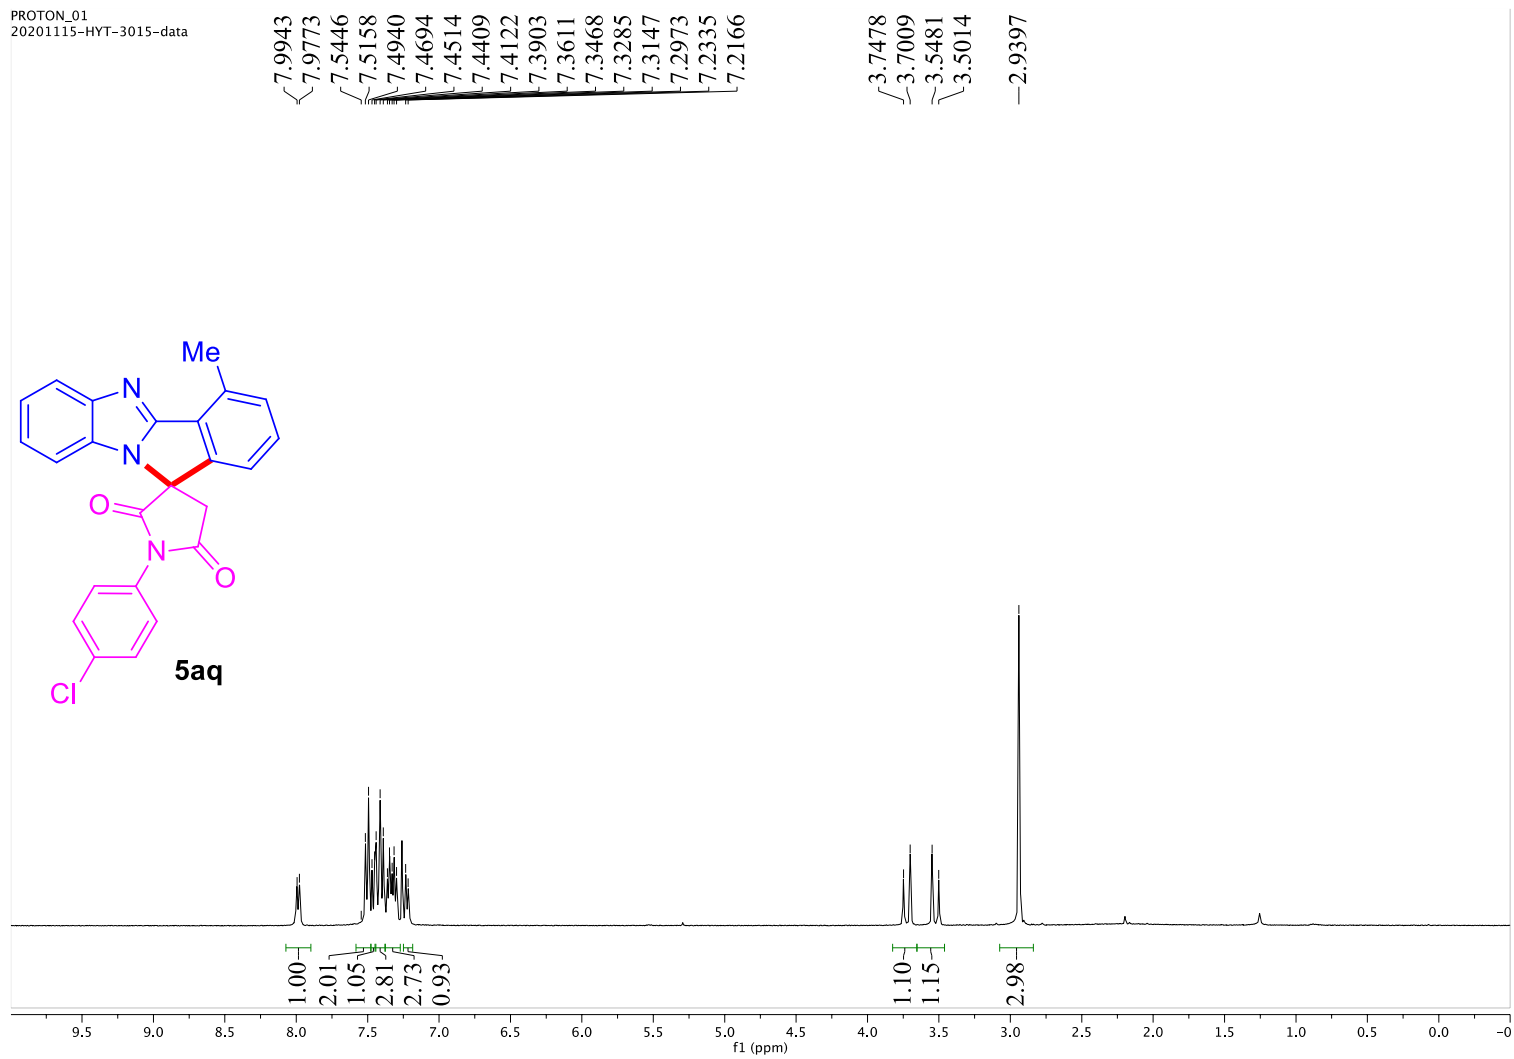

<sup>1</sup>H NMR spectrum (400 MHz) of compound **5aq** in CDCl<sub>3</sub>.

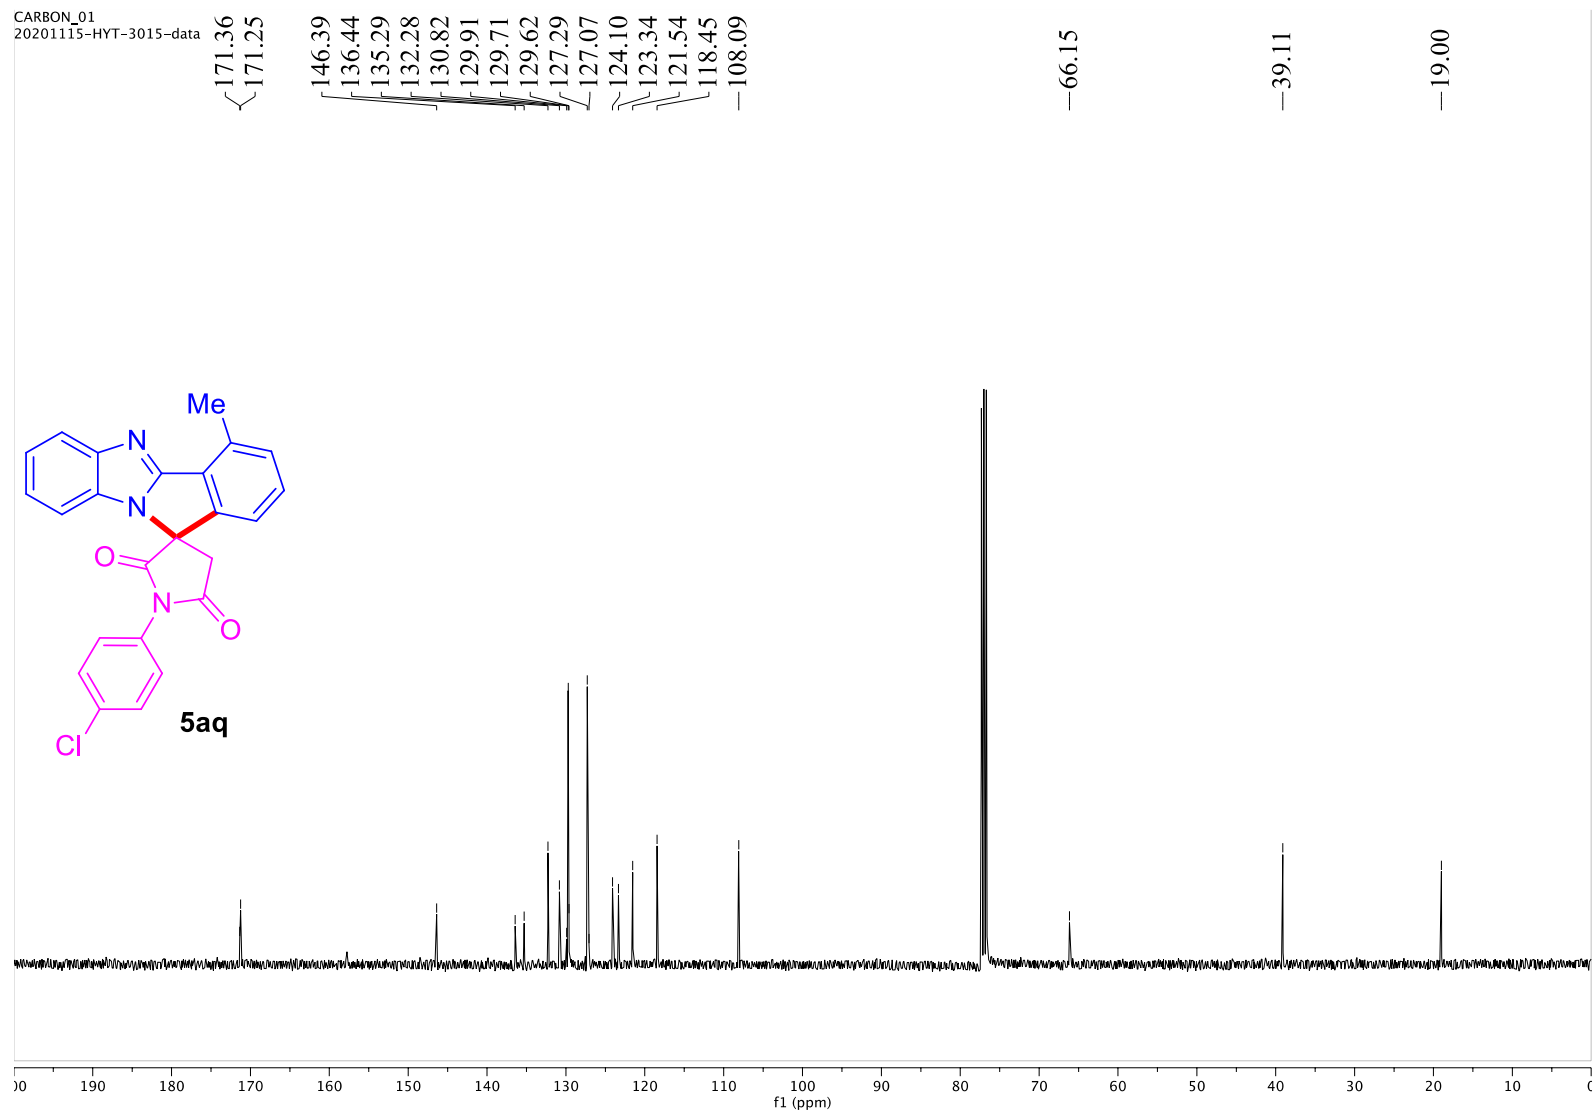

<sup>13</sup>C NMR spectrum (100 MHz) of compound **5aq** in CDCl<sub>3</sub>.

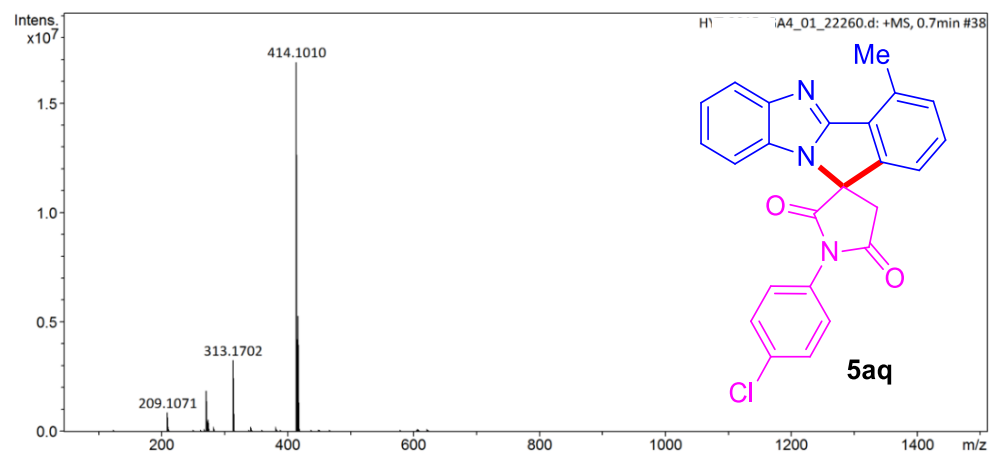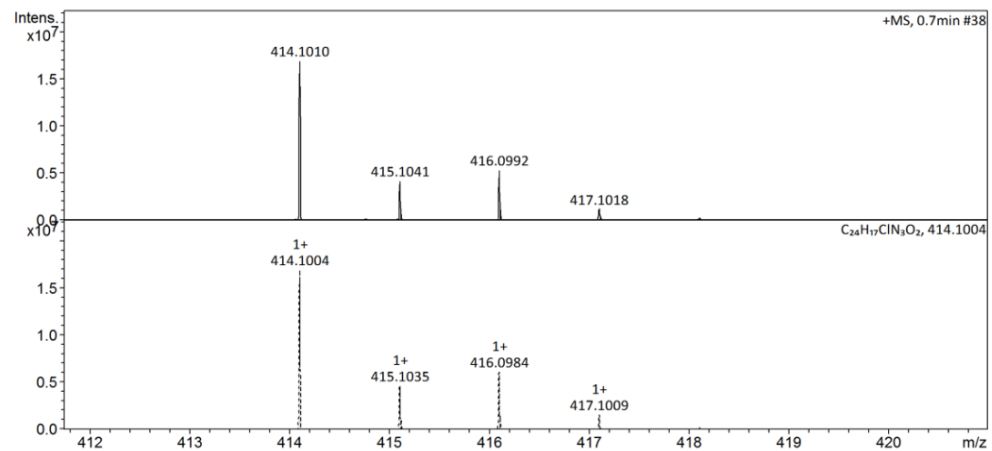

## Display Report

| Meas. m/z | # | Ion Formula                                                     | m/z      | err [ppm] | mSigma | # Sigma | Score  | rdb  | e <sup>-</sup> Conf | N-Rule | Adduct |
|-----------|---|-----------------------------------------------------------------|----------|-----------|--------|---------|--------|------|---------------------|--------|--------|
| 414.1010  | 1 | C <sub>24</sub> H <sub>17</sub> ClN <sub>3</sub> O <sub>2</sub> | 414.1004 | 1.4       | 26.3   | 1       | 100.00 | 17.5 | even                | ok     | M+H    |

HRMS (ESI) of compound **5aq**.

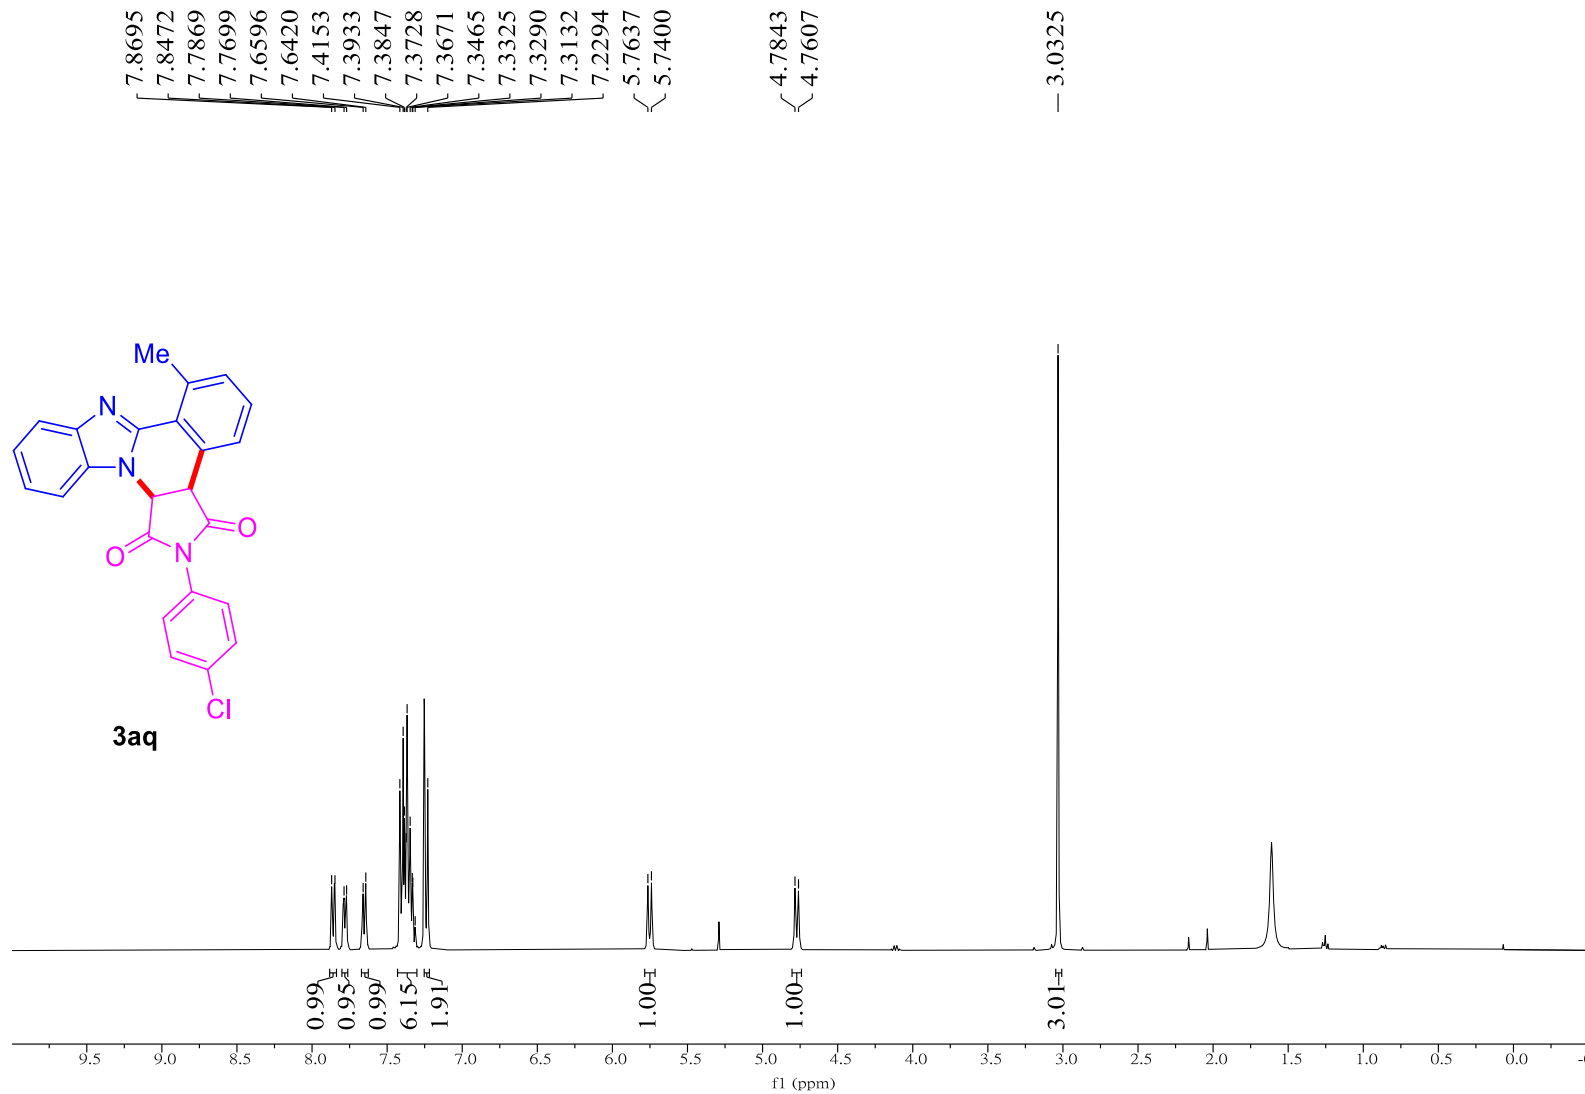

$^1\text{H}$  NMR spectrum (400 MHz) of compound **3aq** in  $\text{CDCl}_3$ .

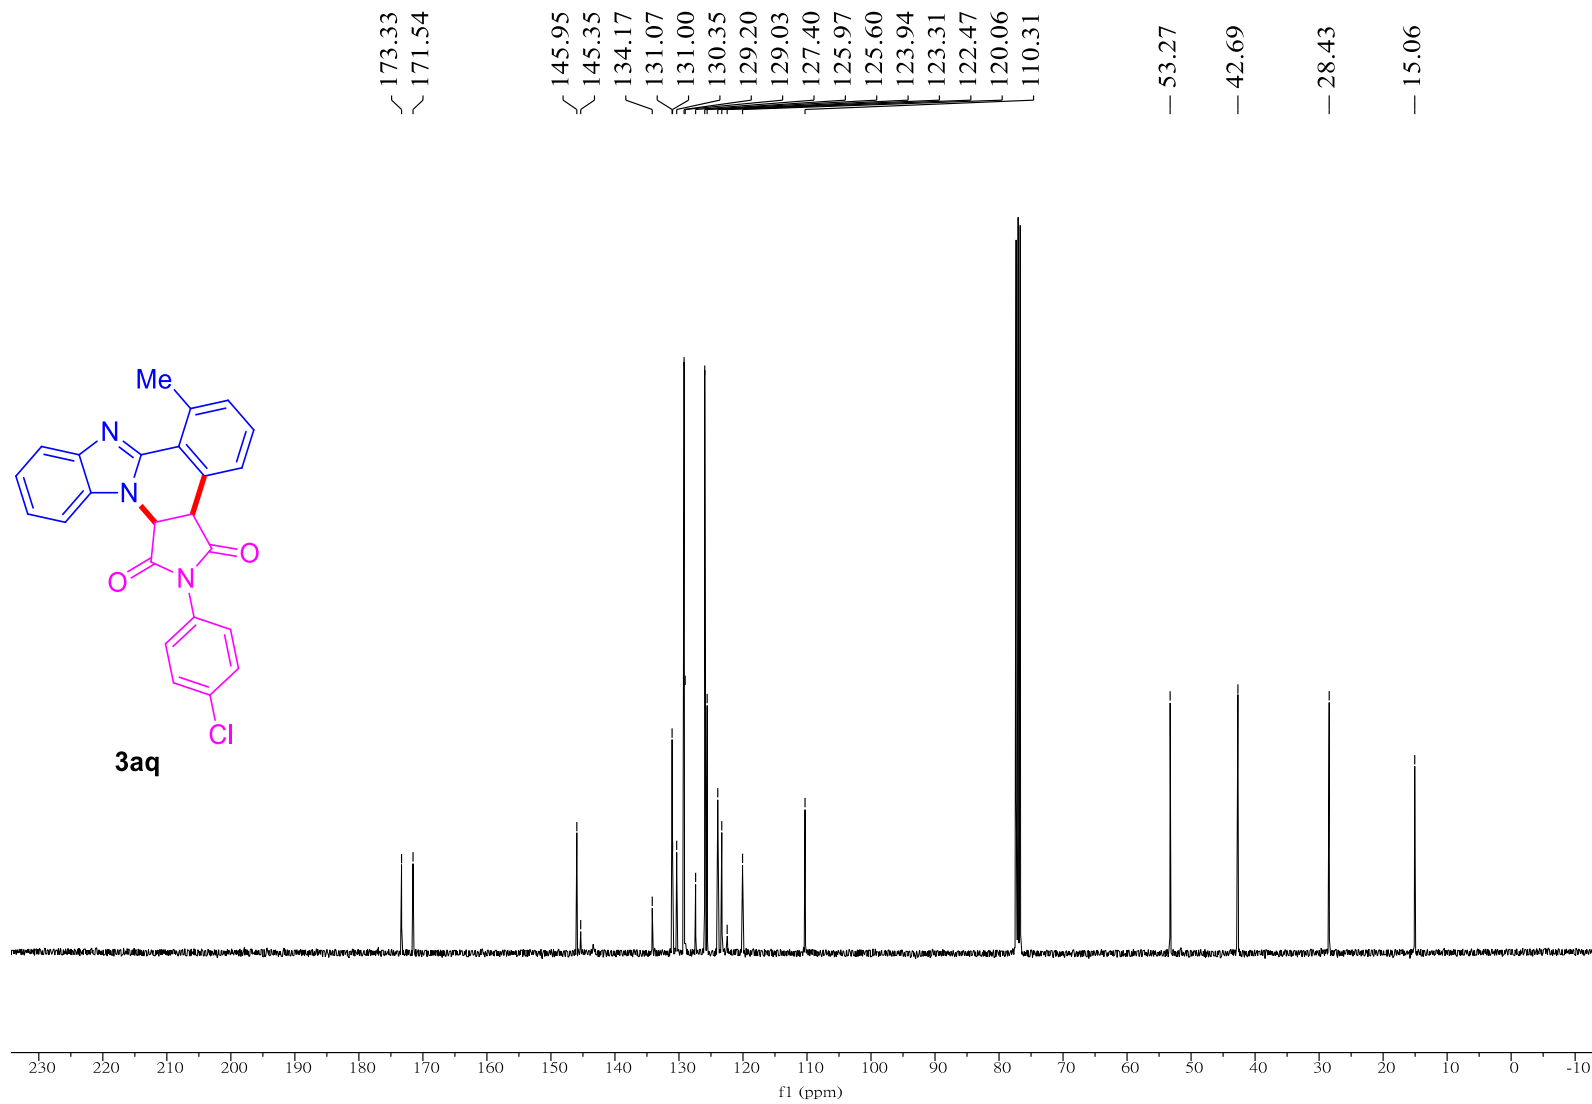

$^{13}\text{C}$  NMR spectrum (100 MHz) of compound **3aq** in  $\text{CDCl}_3$ .

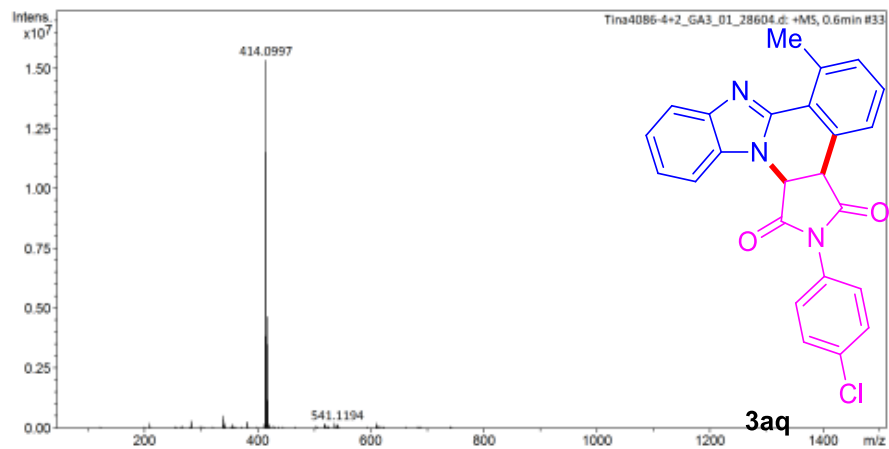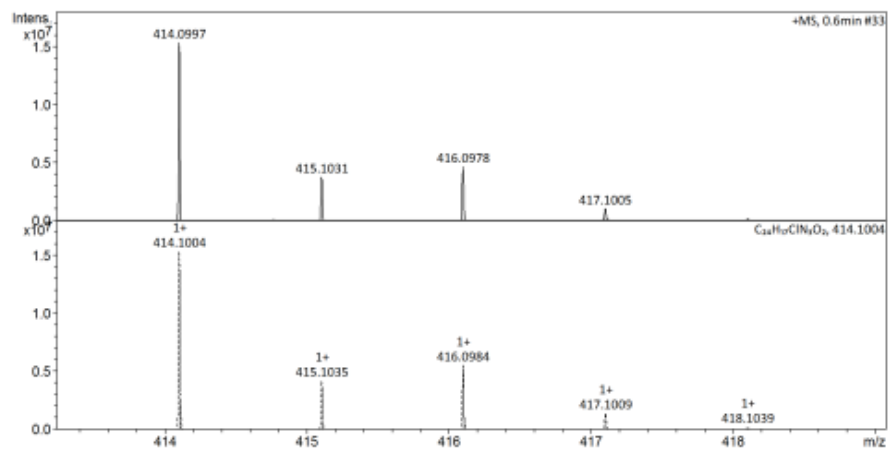

### Display Report

| Meas. m/z | # | Ion Formula                                                     | m/z      | err [ppm] | mSigma | # Sigma | Score  | rdb  | e <sup>-</sup> Conf | N-Rule | Adduct |
|-----------|---|-----------------------------------------------------------------|----------|-----------|--------|---------|--------|------|---------------------|--------|--------|
| 414.0997  | 1 | C <sub>24</sub> H <sub>17</sub> ClN <sub>3</sub> O <sub>2</sub> | 414.1004 | -1.6      | 30.6   | 1       | 100.00 | 17.5 | even                | ok     | M+H    |

HRMS (ESI) of compound **3aq**.

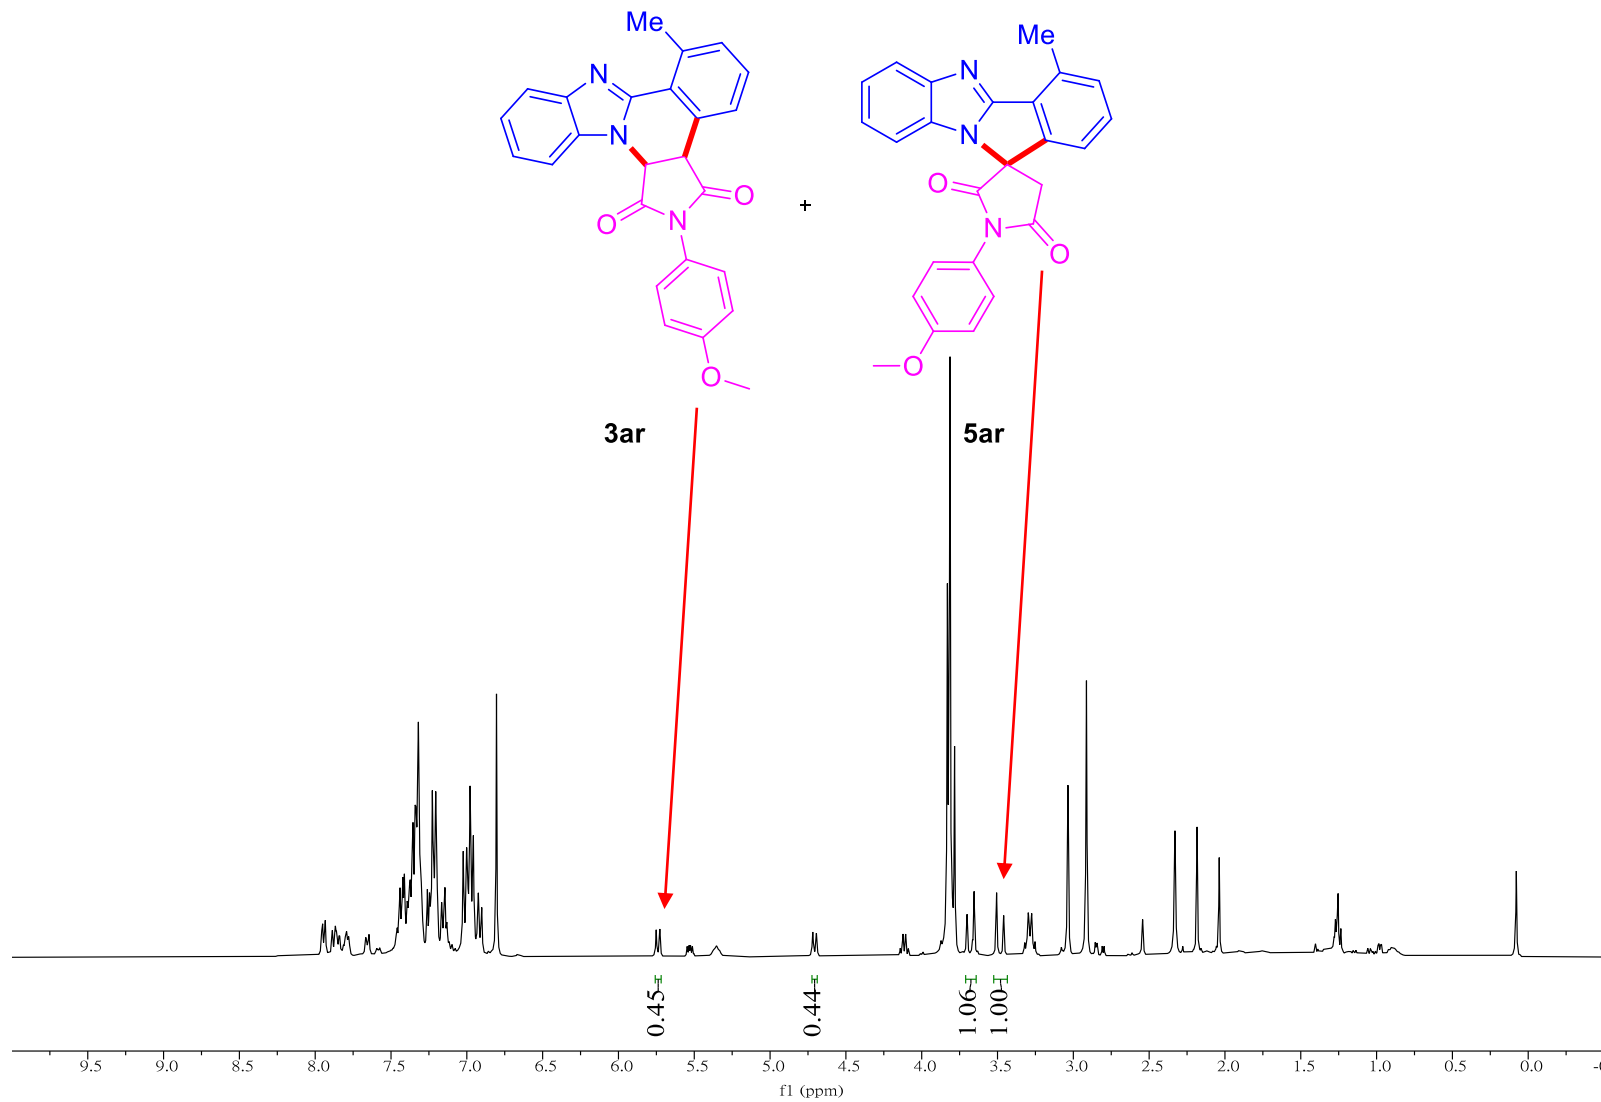

<sup>1</sup>H NMR spectrum (400 MHz) of compound **3ar** and **5ar** in CDCl<sub>3</sub>.

PROTON\_01  
20201121HWW\_1064

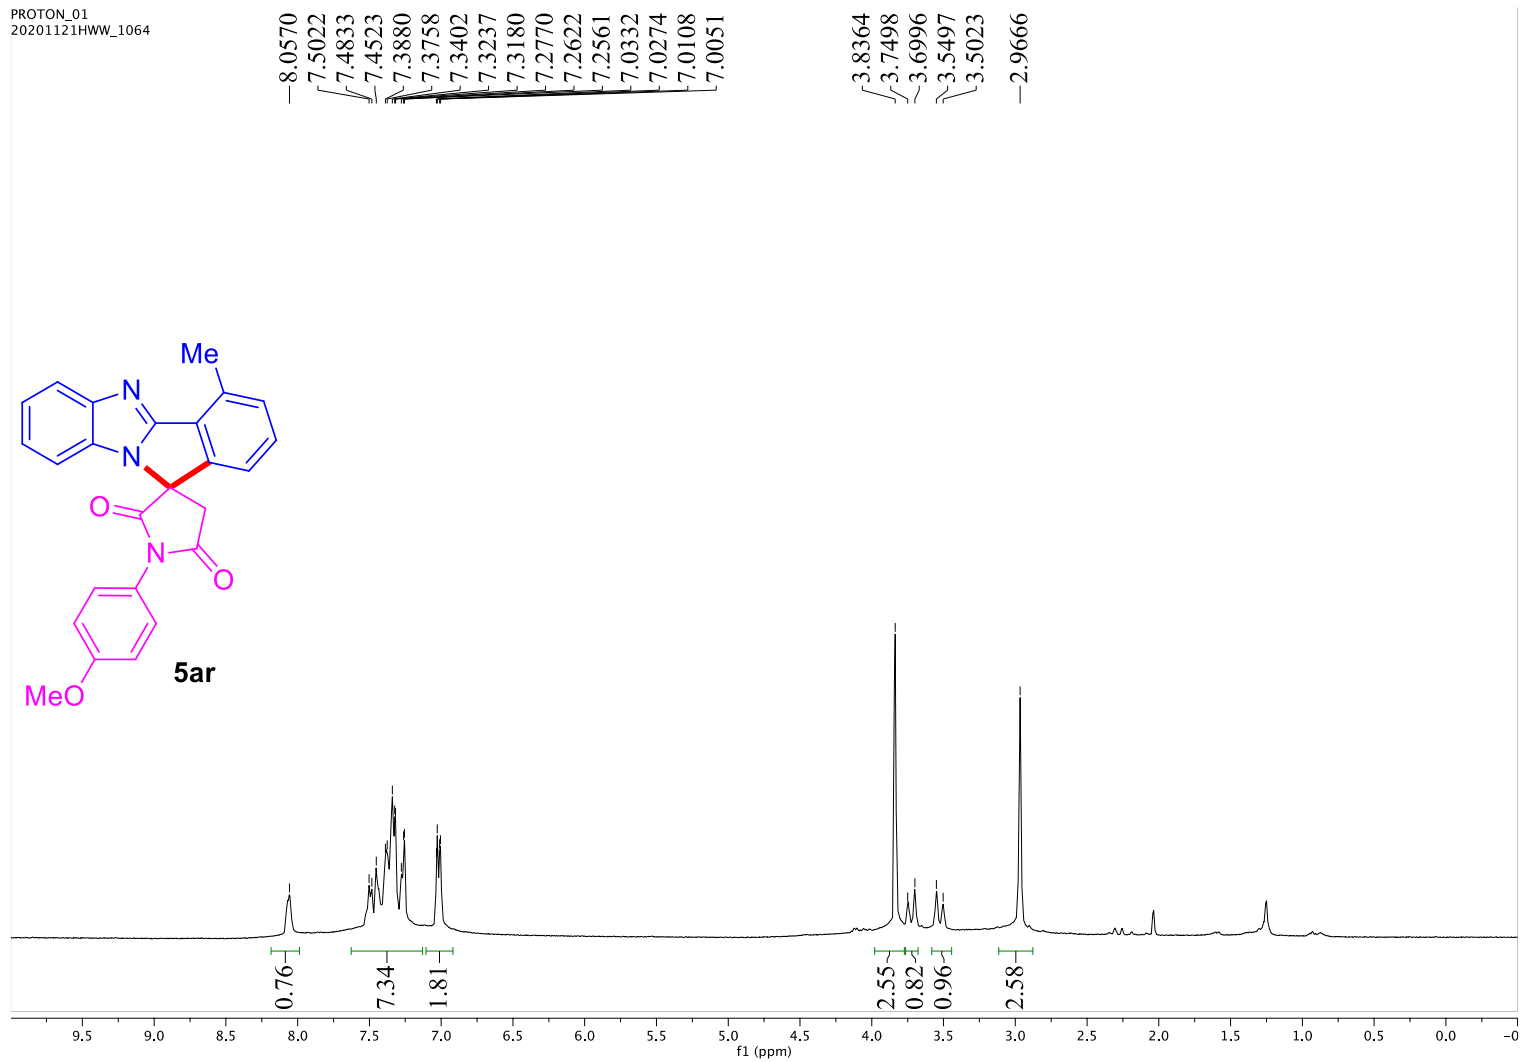

<sup>1</sup>H NMR spectrum (400 MHz) of compound **5ar** in CDCl<sub>3</sub>.



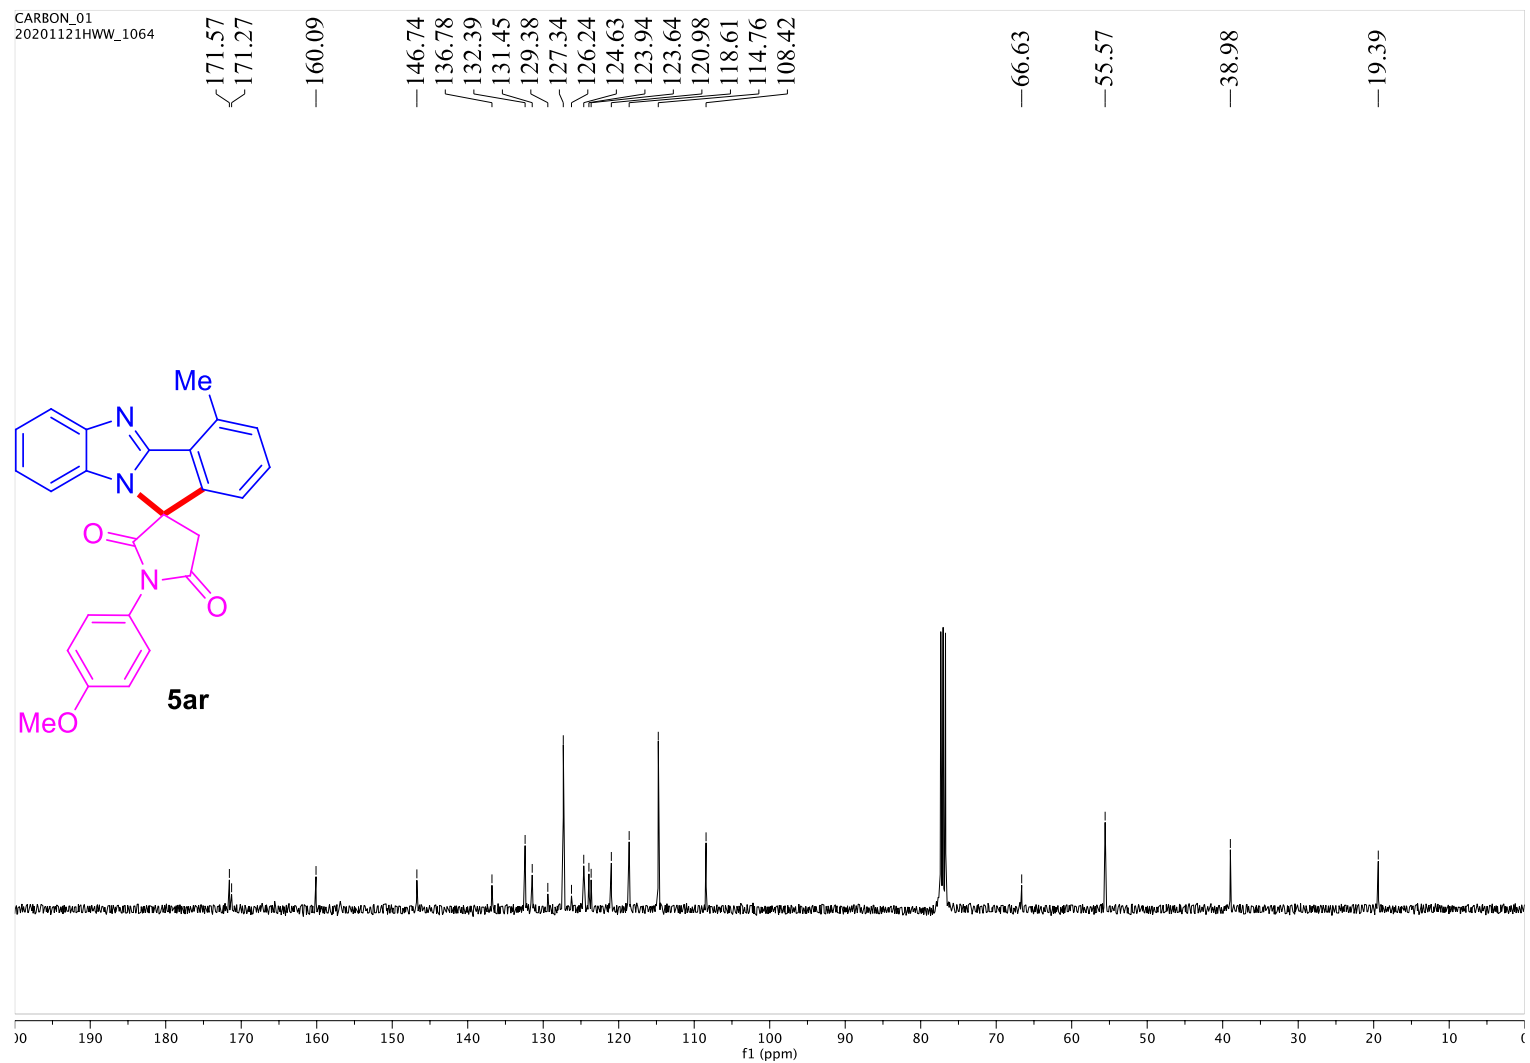

$^{13}\text{C}$  NMR spectrum (100 MHz) of compound **5ar** in  $\text{CDCl}_3$ .

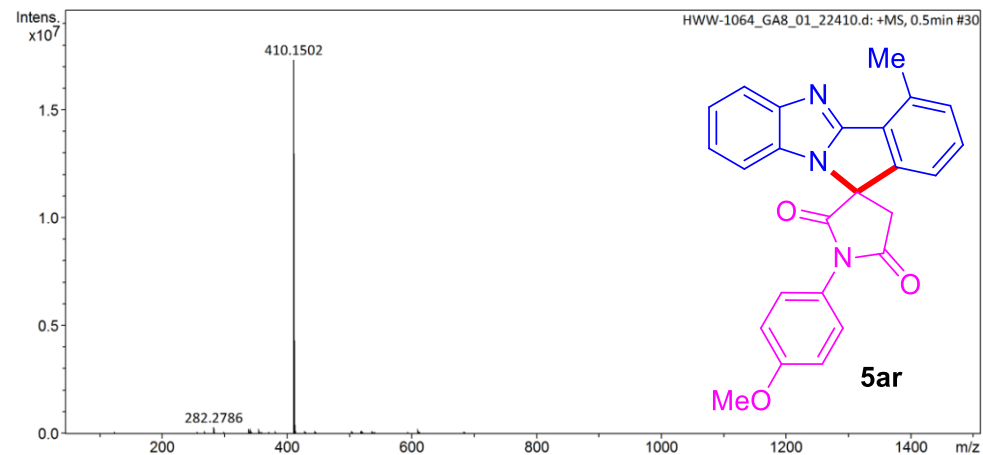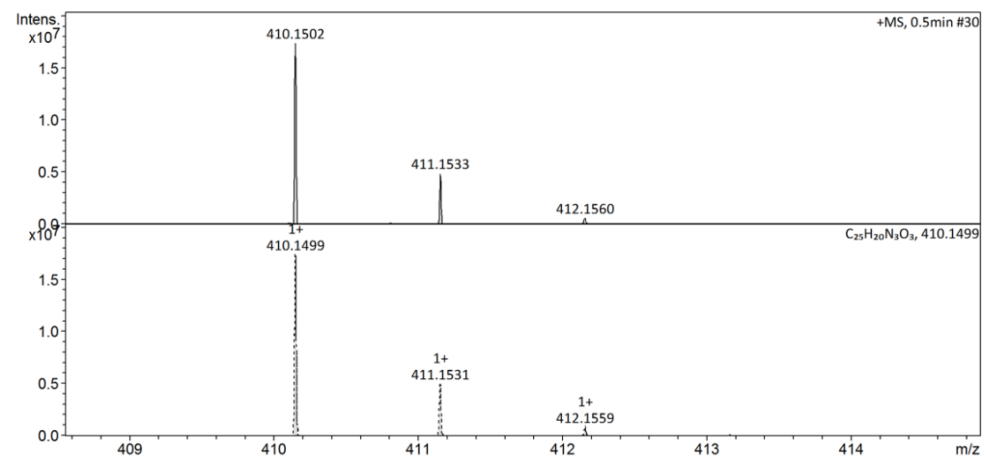

## Display Report

| Meas. $m/z$ | # | Ion Formula          | $m/z$    | err [ppm] | mSigma | # Sigma | Score  | rdb  | $e^-$ Conf | N-Rule | Adduct |
|-------------|---|----------------------|----------|-----------|--------|---------|--------|------|------------|--------|--------|
| 410.1502    | 1 | $C_{25}H_{20}N_4O_3$ | 410.1499 | -0.6      | 6.4    | 1       | 100.00 | 17.5 | even       | ok     | M+H    |

HRMS (ESI) of compound **5ar**.

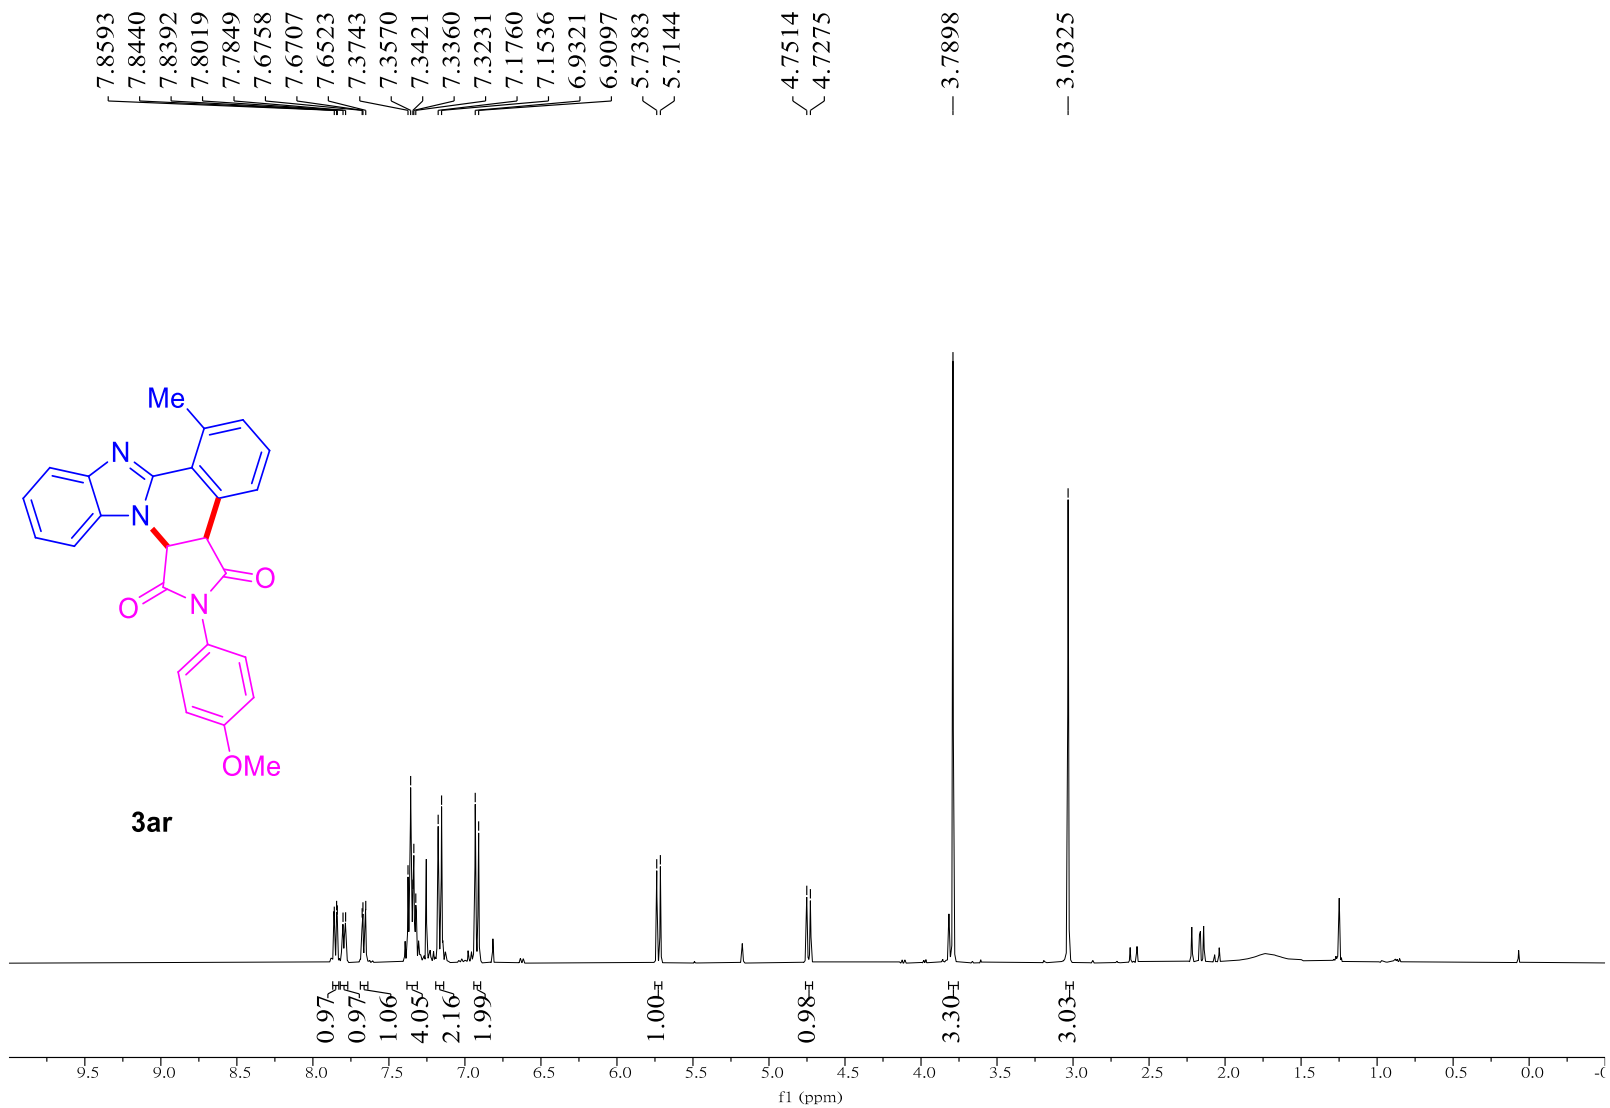

$^1\text{H}$  NMR spectrum (400 MHz) of compound **3ar** in  $\text{CDCl}_3$ .

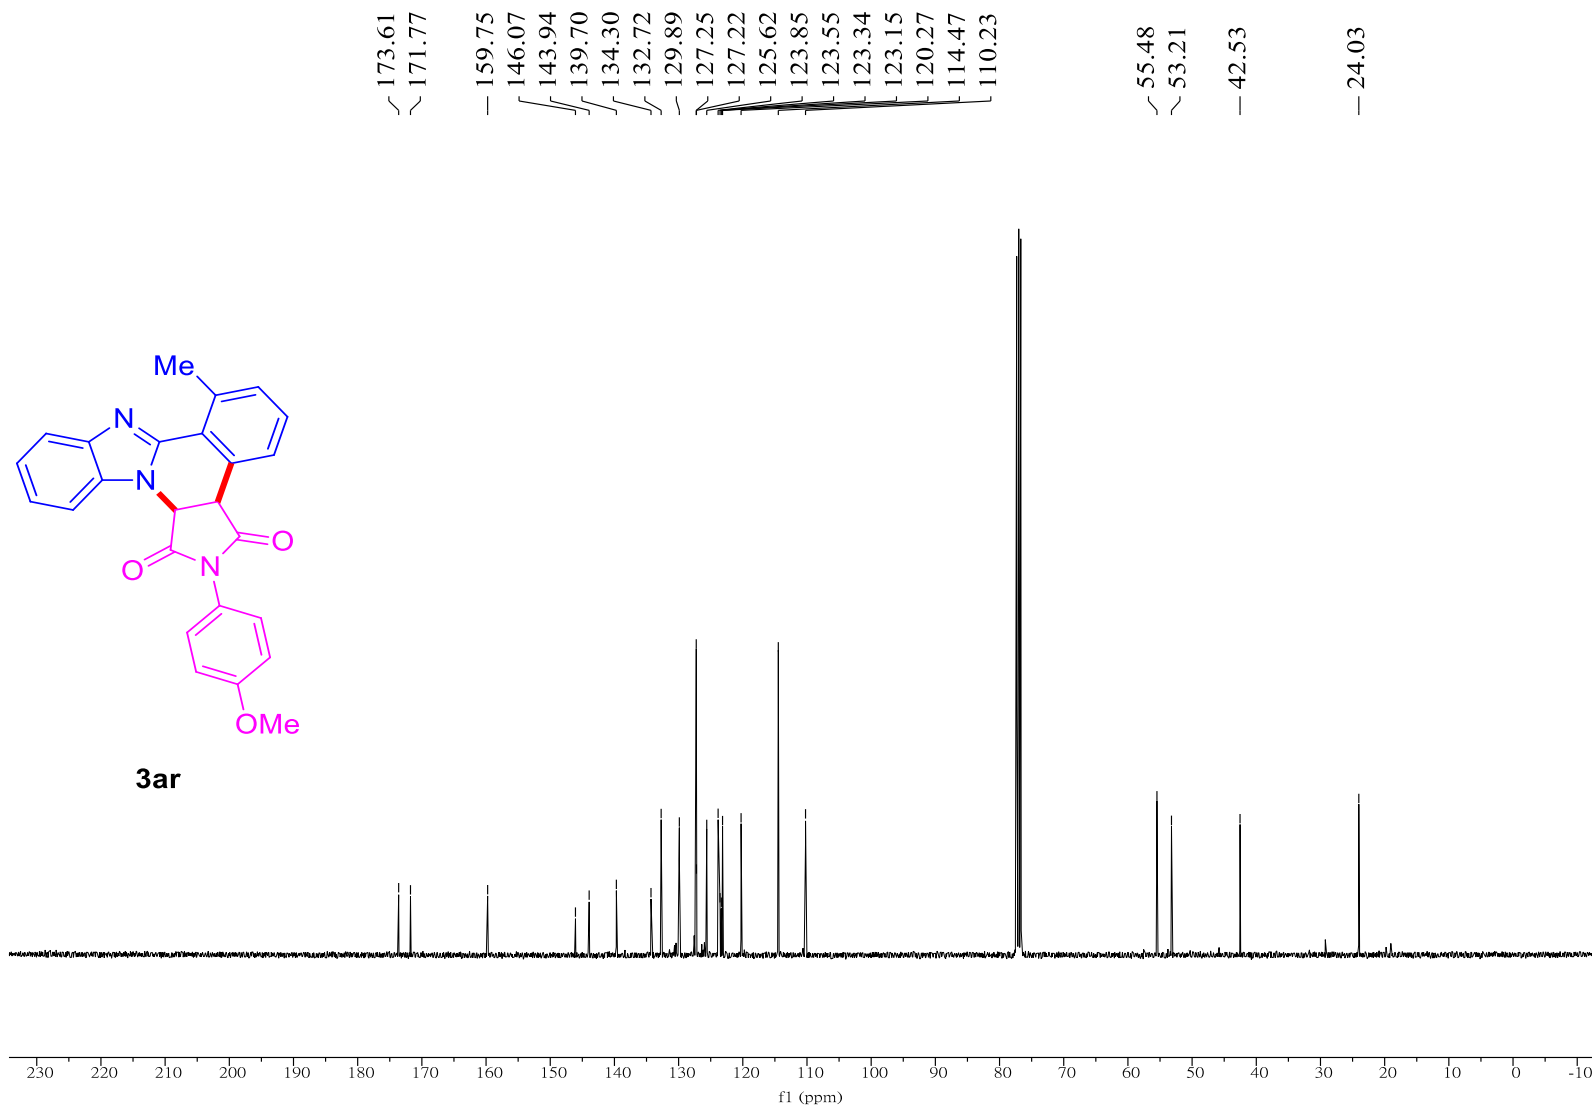

$^{13}\text{C}$  NMR spectrum (100 MHz) of compound **3ar** in  $\text{CDCl}_3$ .

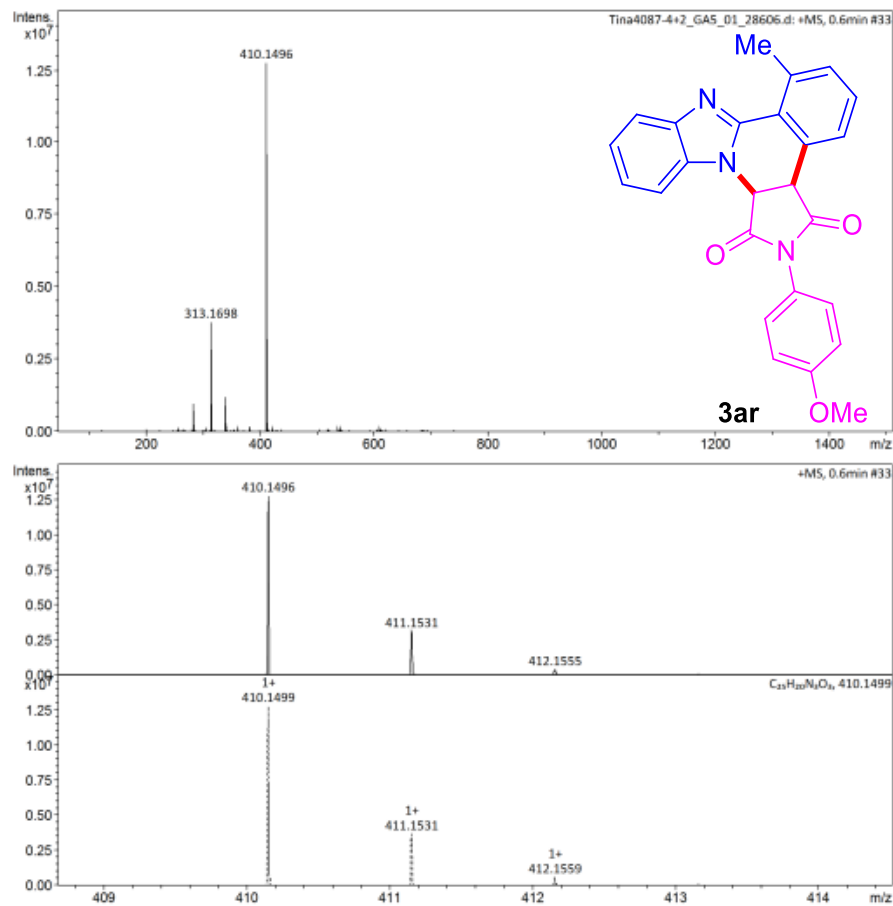

### Display Report

| Meas. m/z | # | Ion Formula                                                   | m/z      | err [ppm] | mSigma | # Sigma | Score  | rdb  | e <sup>-</sup> Conf | N-Rule | Adduct |
|-----------|---|---------------------------------------------------------------|----------|-----------|--------|---------|--------|------|---------------------|--------|--------|
| 410.1496  | 1 | C <sub>25</sub> H <sub>20</sub> N <sub>3</sub> O <sub>3</sub> | 410.1499 | 0.8       | 22.3   | 1       | 100.00 | 17.5 | even                | ok     | M+H    |

HRMS (ESI) of compound **3ar**.

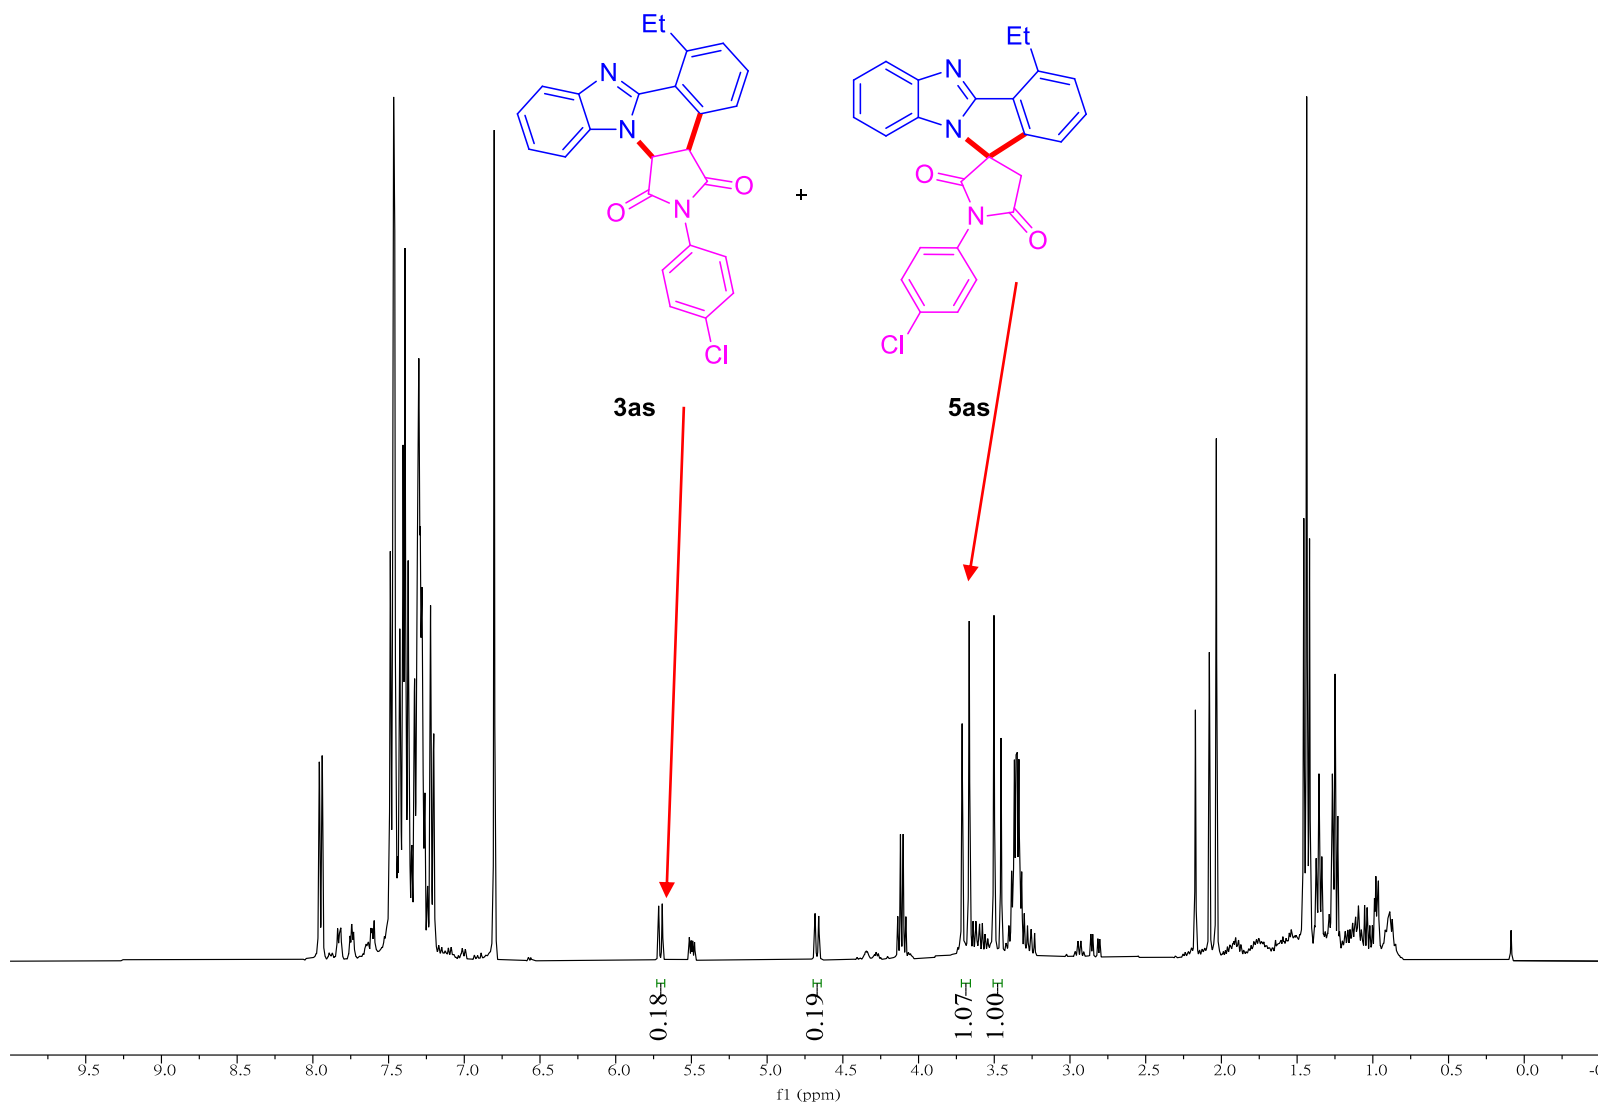

$^1\text{H}$  NMR spectrum (400 MHz) of compound **3as** and **5as** in  $\text{CDCl}_3$ .

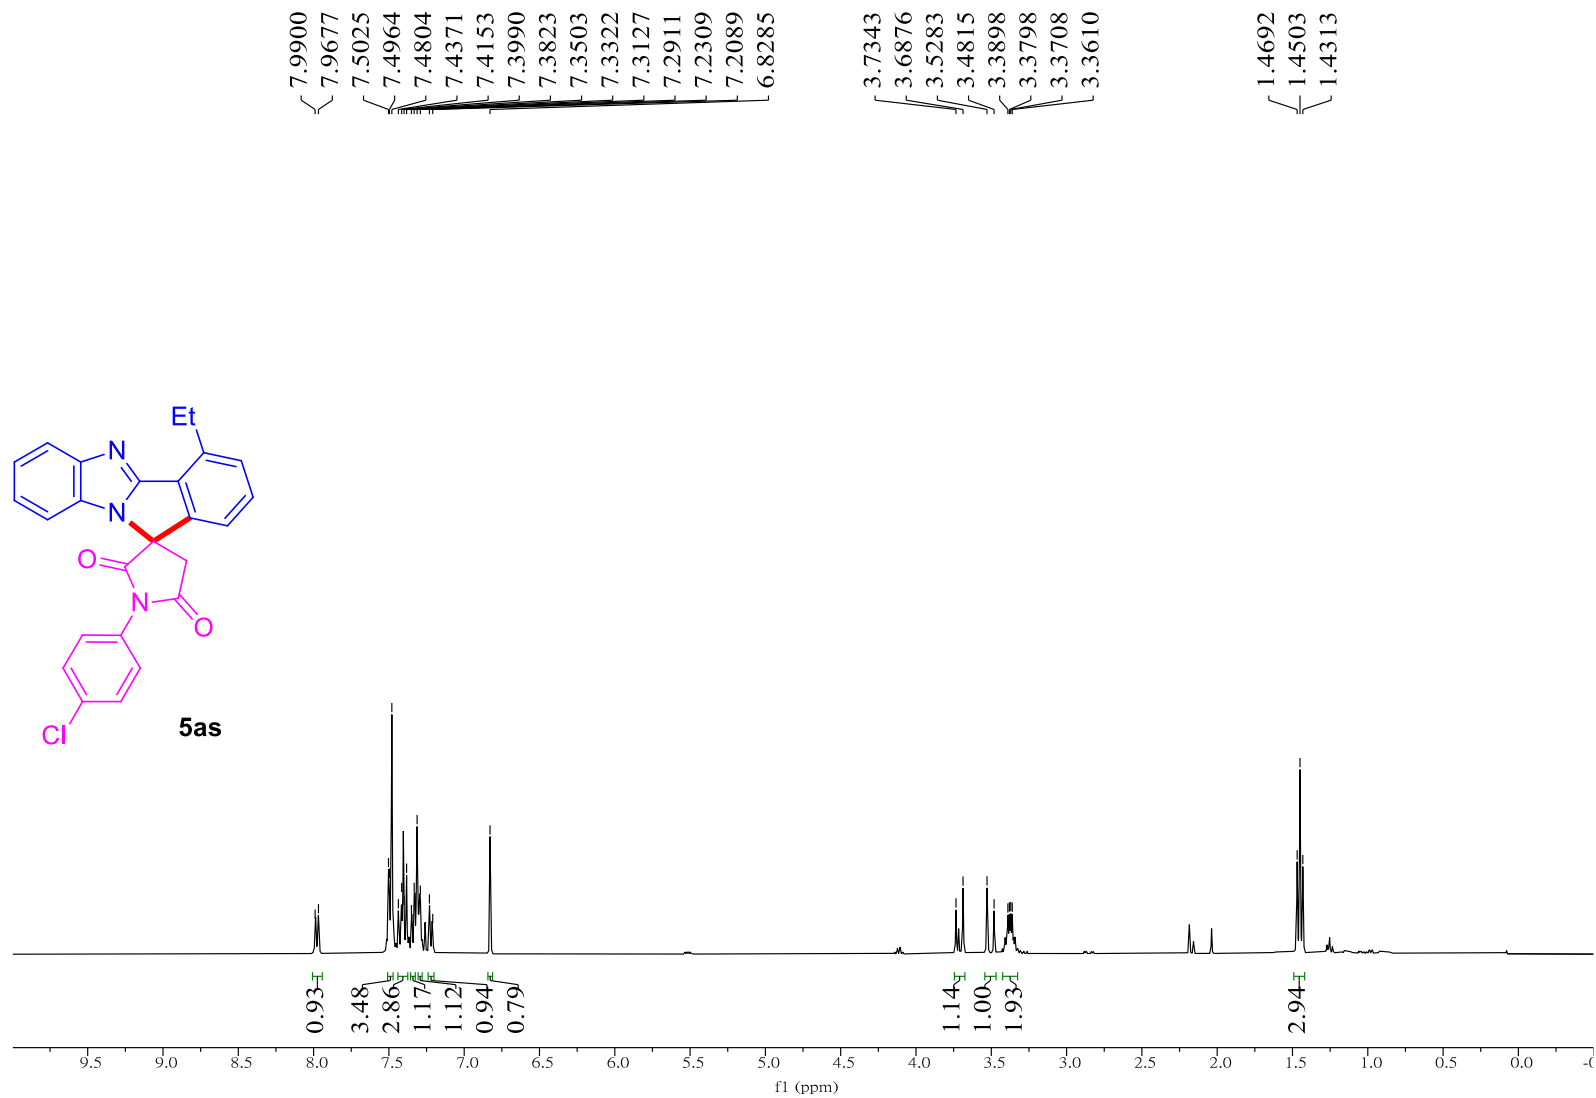

$^1\text{H}$  NMR spectrum (400 MHz) of compound **5as** in  $\text{CDCl}_3$ .

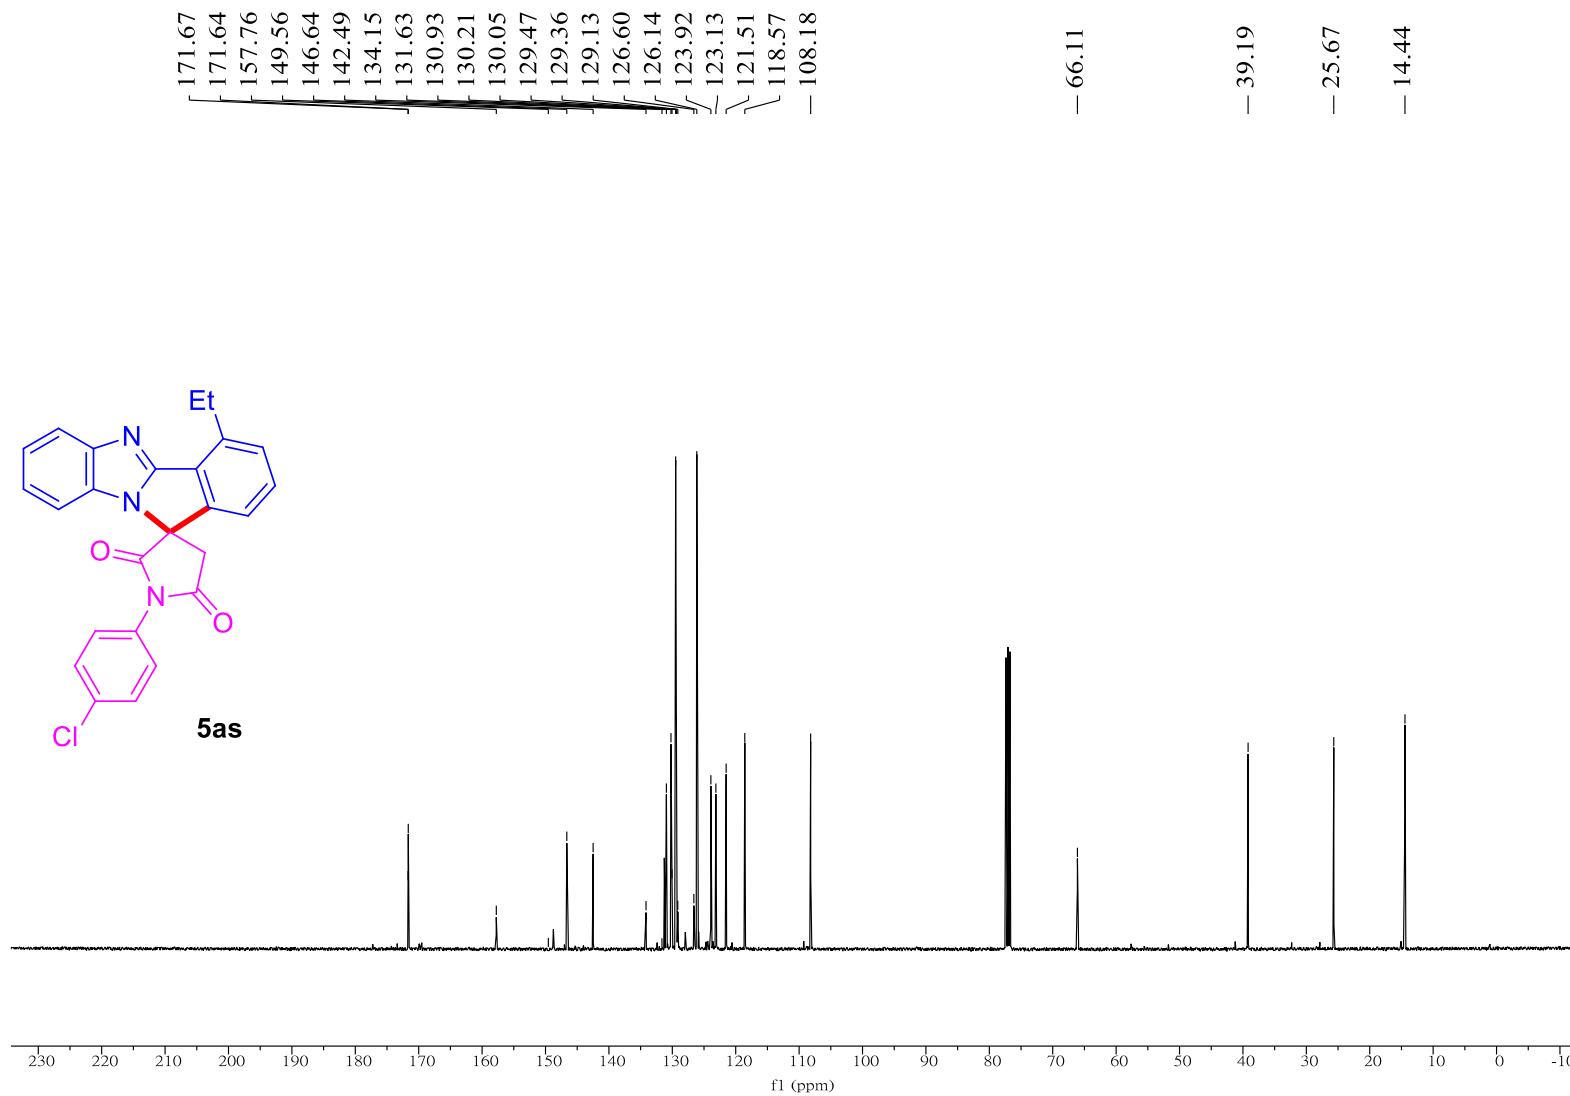

$^{13}\text{C}$  NMR spectrum (100 MHz) of compound **5as** in  $\text{CDCl}_3$ .



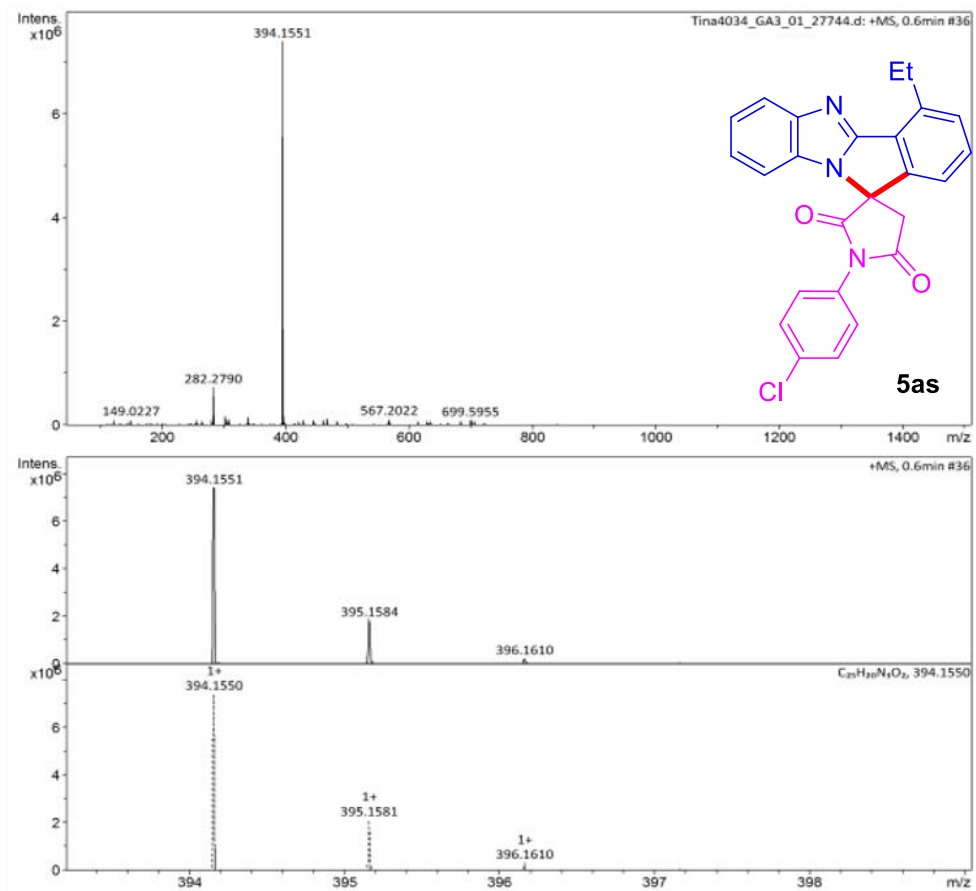

### Display Report

| Meas. m/z | # | Ion Formula                                                   | m/z      | err [ppm] | mSigma | # Sigma | Score  | rdb  | e <sup>-</sup> Conf | N-Rule | Adduct |
|-----------|---|---------------------------------------------------------------|----------|-----------|--------|---------|--------|------|---------------------|--------|--------|
| 394.1551  | 1 | C <sub>25</sub> H <sub>20</sub> N <sub>4</sub> O <sub>2</sub> | 394.1550 | 0.2       | 19.7   | 1       | 100.00 | 17.5 | even                | ok     | M+H    |

HRMS (ESI) of compound **5as**.

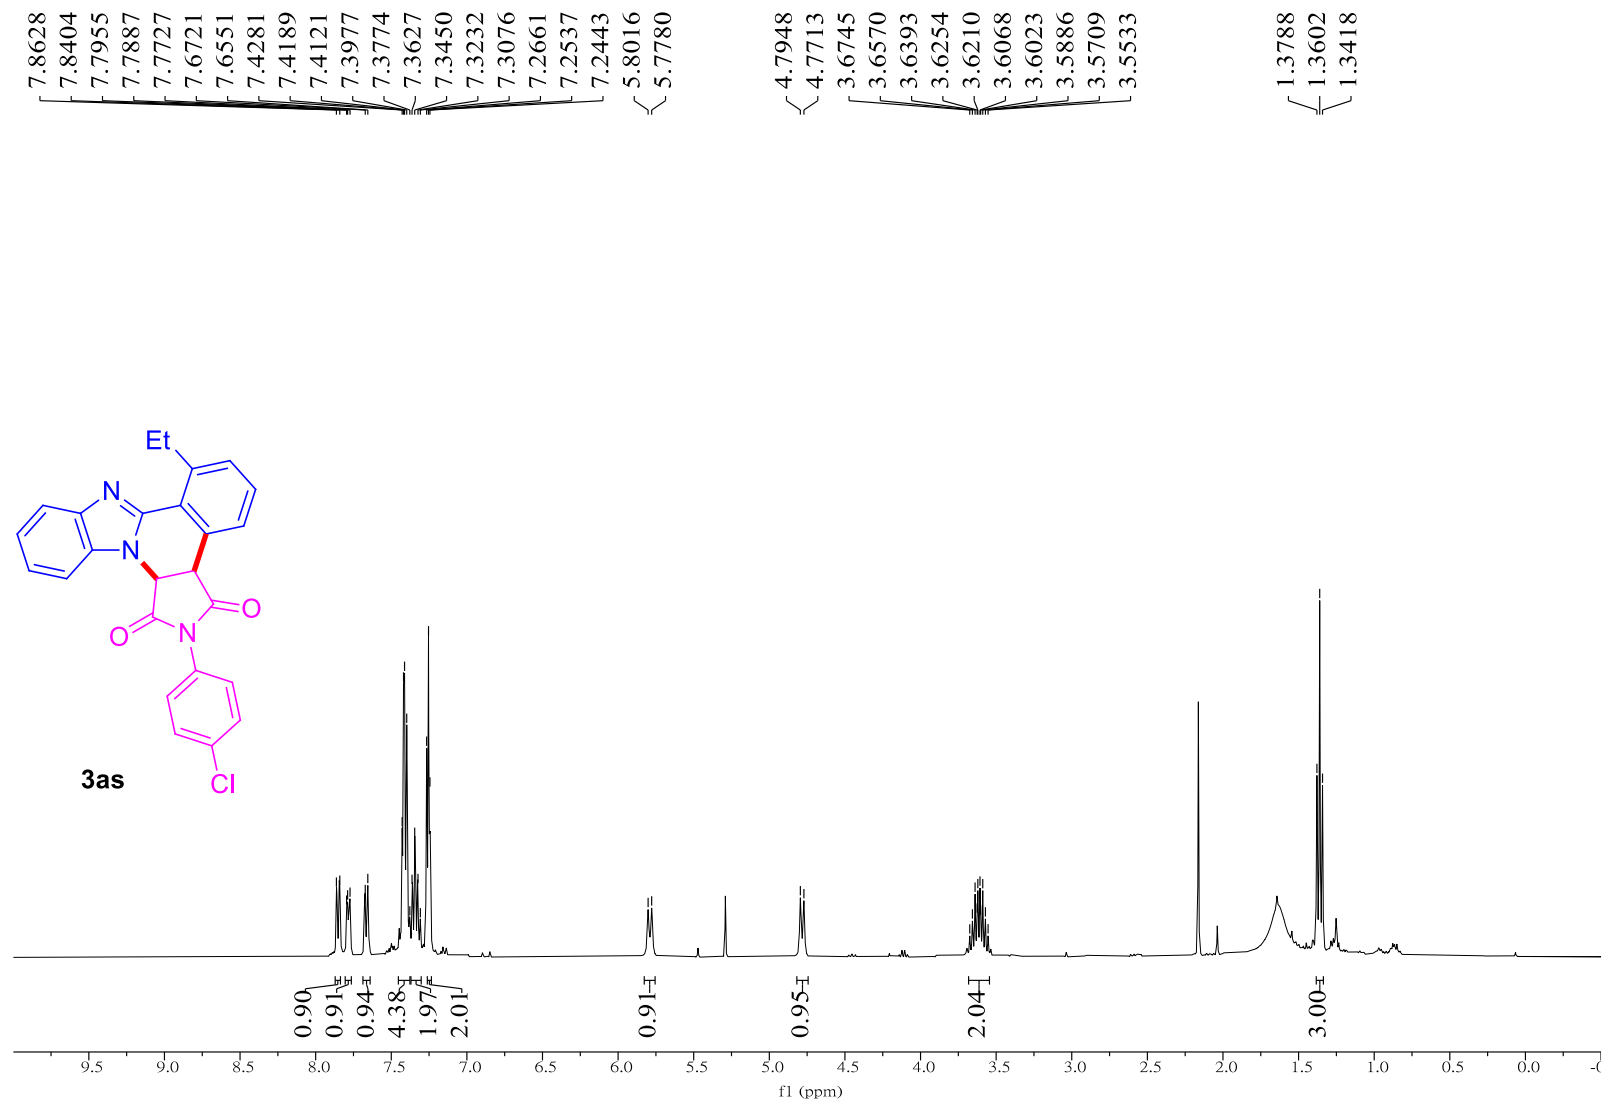

$^1\text{H}$  NMR spectrum (400 MHz) of compound **3as** in  $\text{CDCl}_3$ .

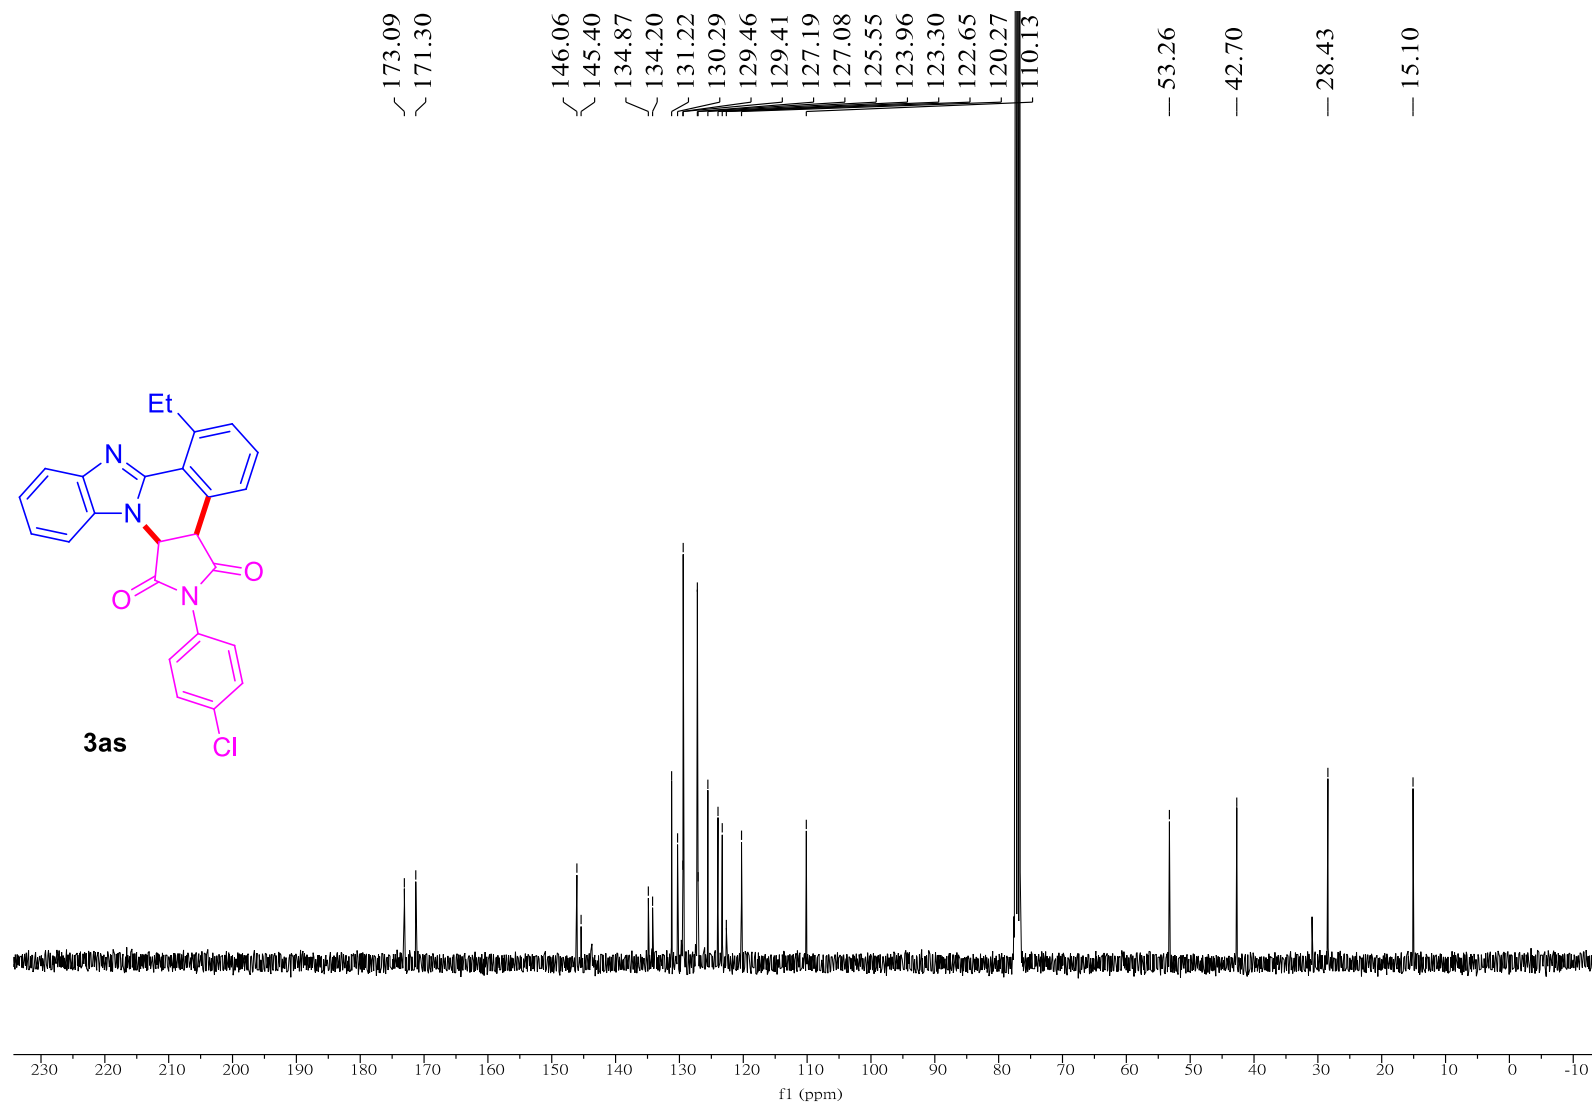

<sup>13</sup>C NMR spectrum (100 MHz) of compound **3as** in CDCl<sub>3</sub>.

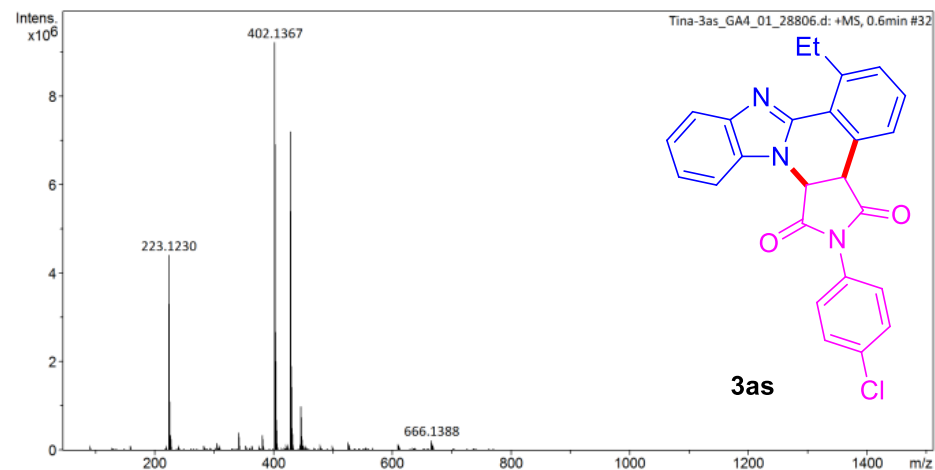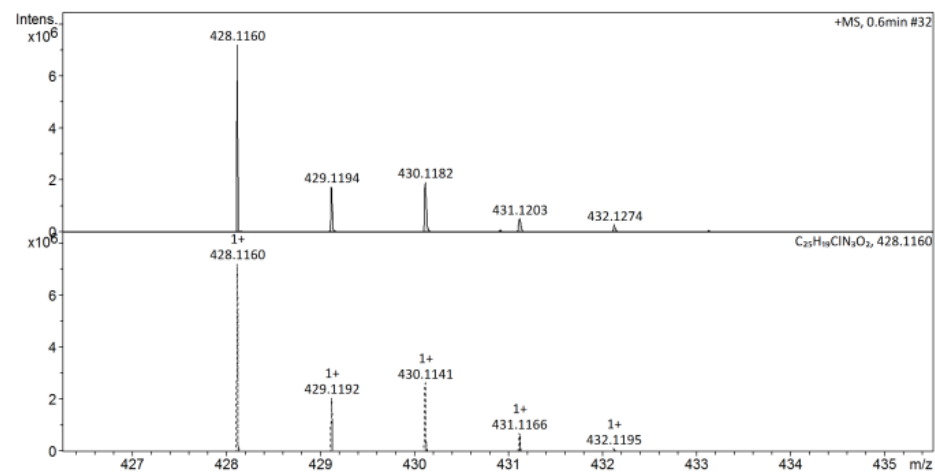

### Display Report

| Meas. m/z | # | Ion Formula                                                     | m/z      | err [ppm] | mSigma | # Sigma | Score  | rdb  | e <sup>-</sup> Conf | N-Rule | Adduct |
|-----------|---|-----------------------------------------------------------------|----------|-----------|--------|---------|--------|------|---------------------|--------|--------|
| 428.1160  | 1 | C <sub>25</sub> H <sub>19</sub> ClN <sub>3</sub> O <sub>2</sub> | 428.1160 | -0.0      | 50.2   | 1       | 100.00 | 17.5 | even                | ok     | M+H    |

HRMS (ESI) of compound **3as**.

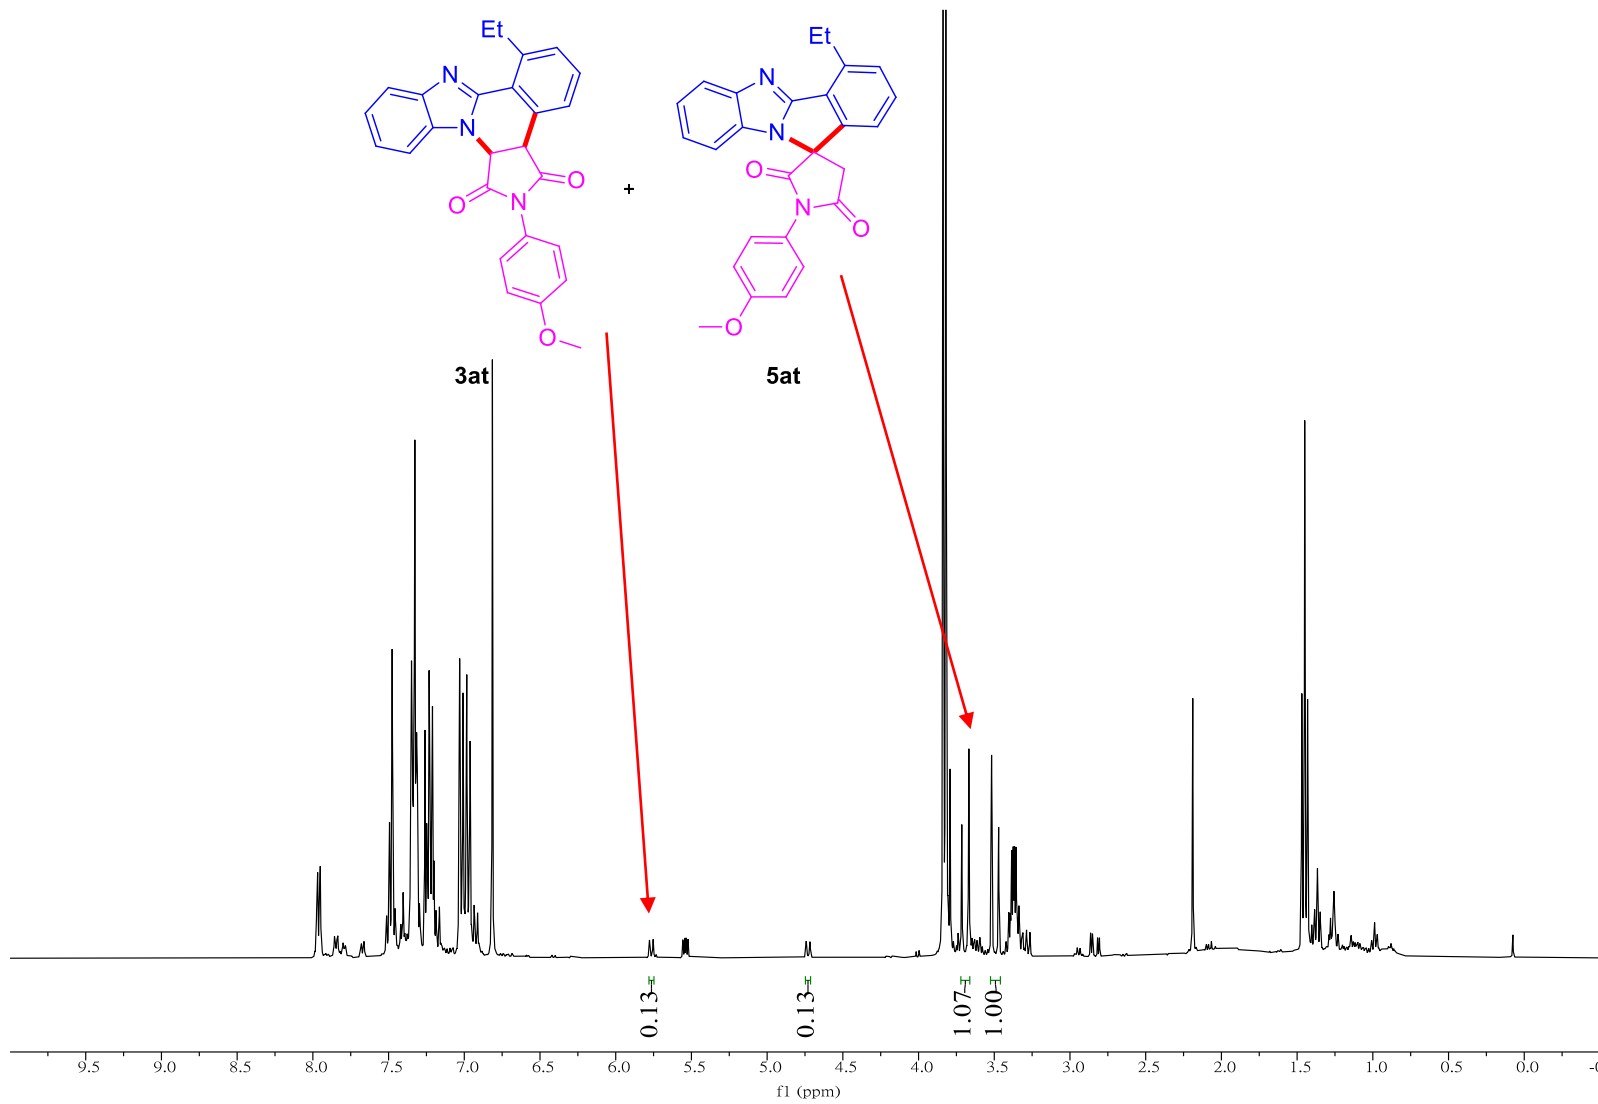

$^1\text{H}$  NMR spectrum (400 MHz) of compound **3at** and **5at** in  $\text{CDCl}_3$ .

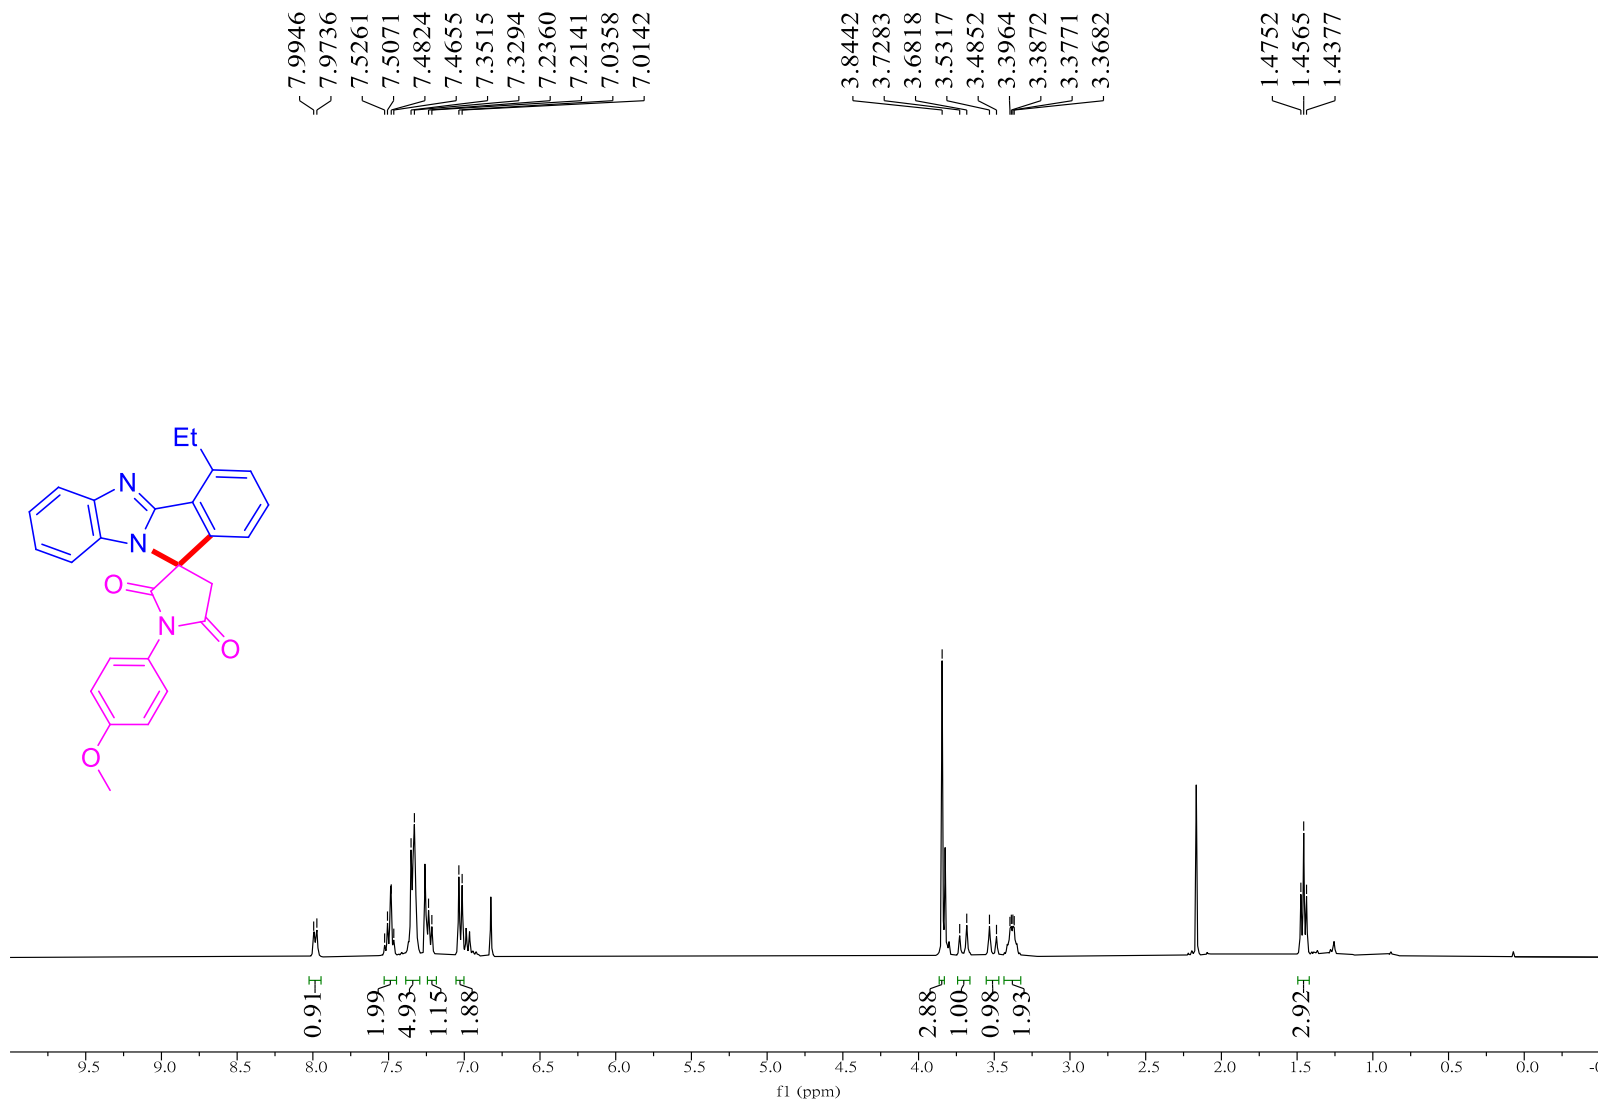

<sup>1</sup>H NMR spectrum (400 MHz) of compound **5at** in CDCl<sub>3</sub>.

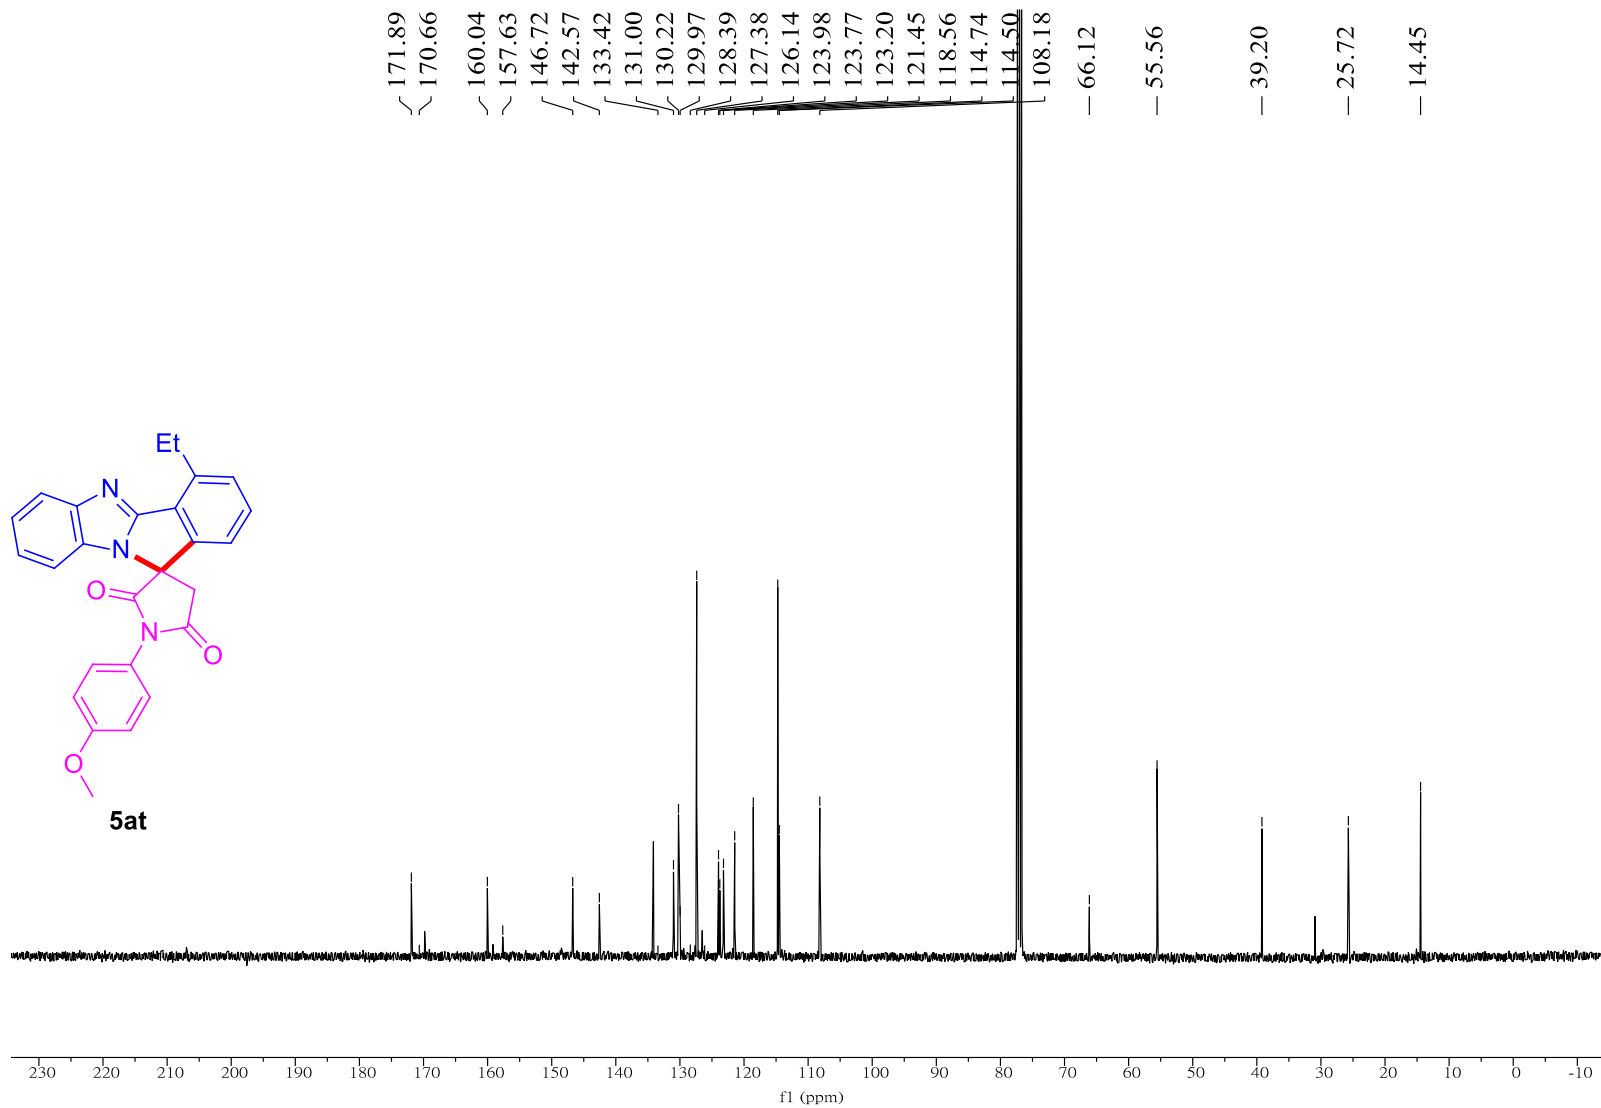

$^{13}\text{C}$  NMR spectrum (100 MHz) of compound **5at** in  $\text{CDCl}_3$ .

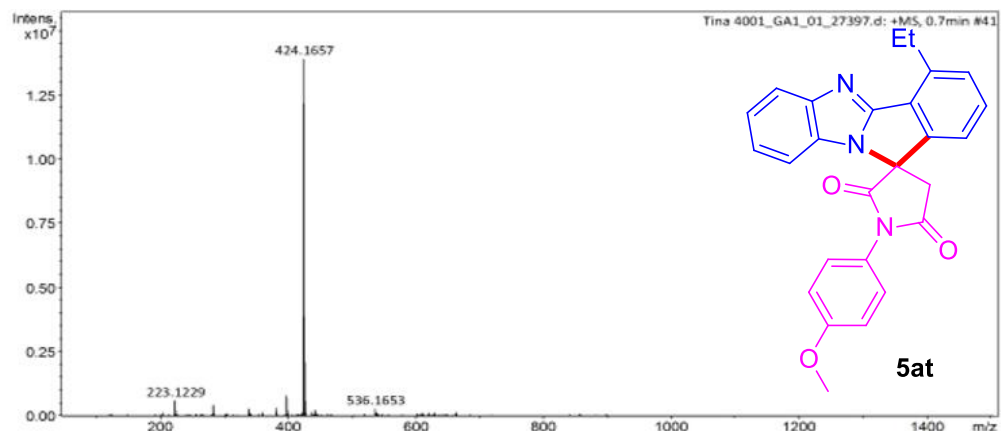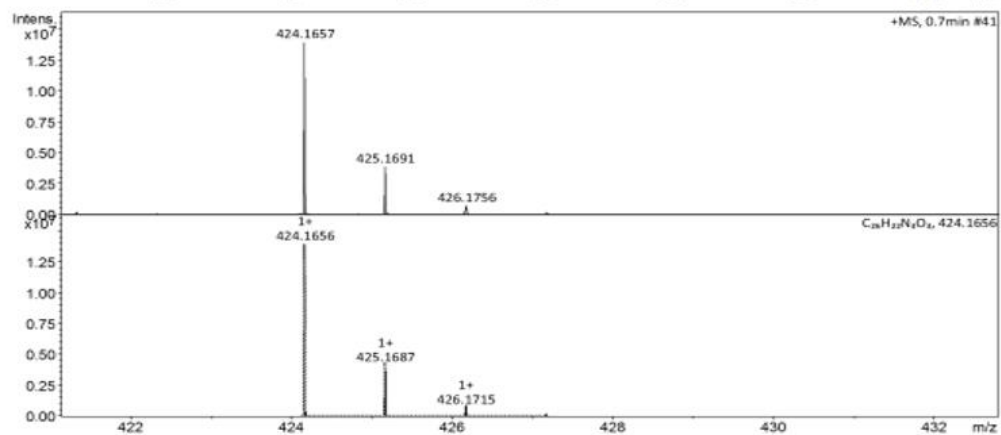

### Display Report

| Meas. m/z | # | Ion Formula                                                   | m/z      | err [ppm] | mSigma | # Sigma | Score  | rdb  | e <sup>-</sup> Conf | N-Rule | Adduct |
|-----------|---|---------------------------------------------------------------|----------|-----------|--------|---------|--------|------|---------------------|--------|--------|
| 424.1657  | 1 | C <sub>28</sub> H <sub>22</sub> N <sub>3</sub> O <sub>3</sub> | 424.1656 | 0.4       | 8.9    | 1       | 100.00 | 17.5 | even                | ok     | M+H    |

HRMS (ESI) of compound **5at**.



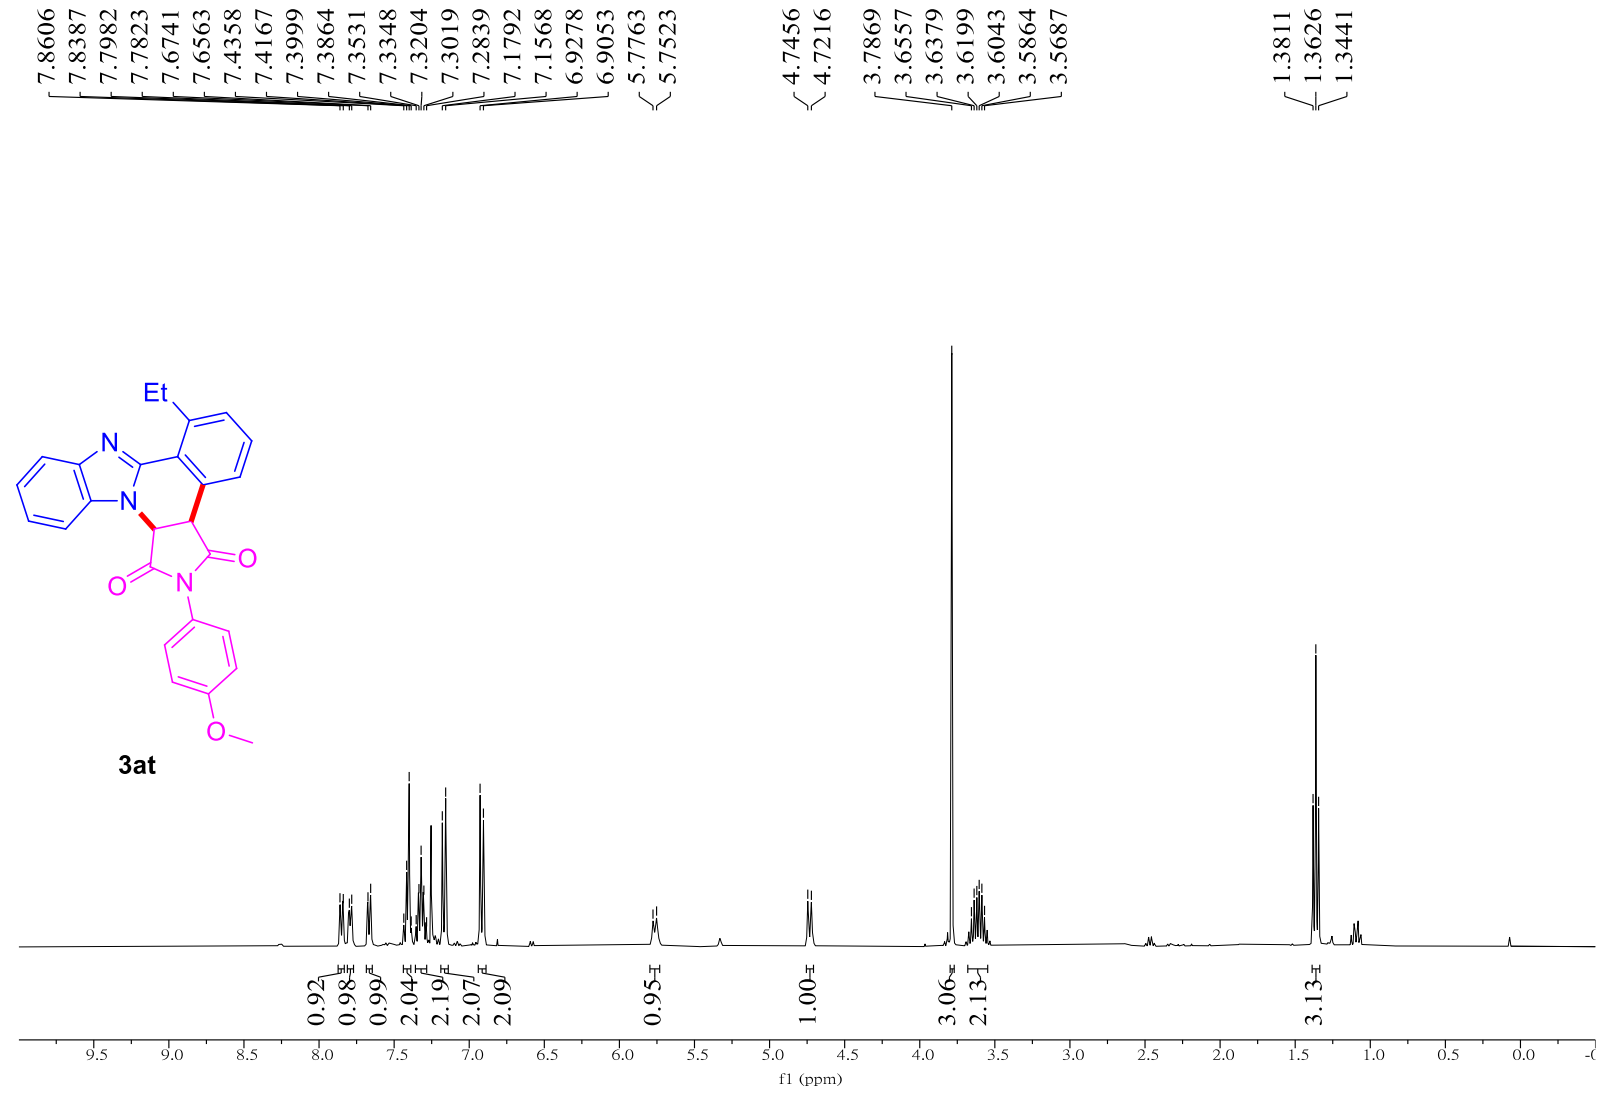

<sup>1</sup>H NMR spectrum (400 MHz) of compound **3at** in CDCl<sub>3</sub>.

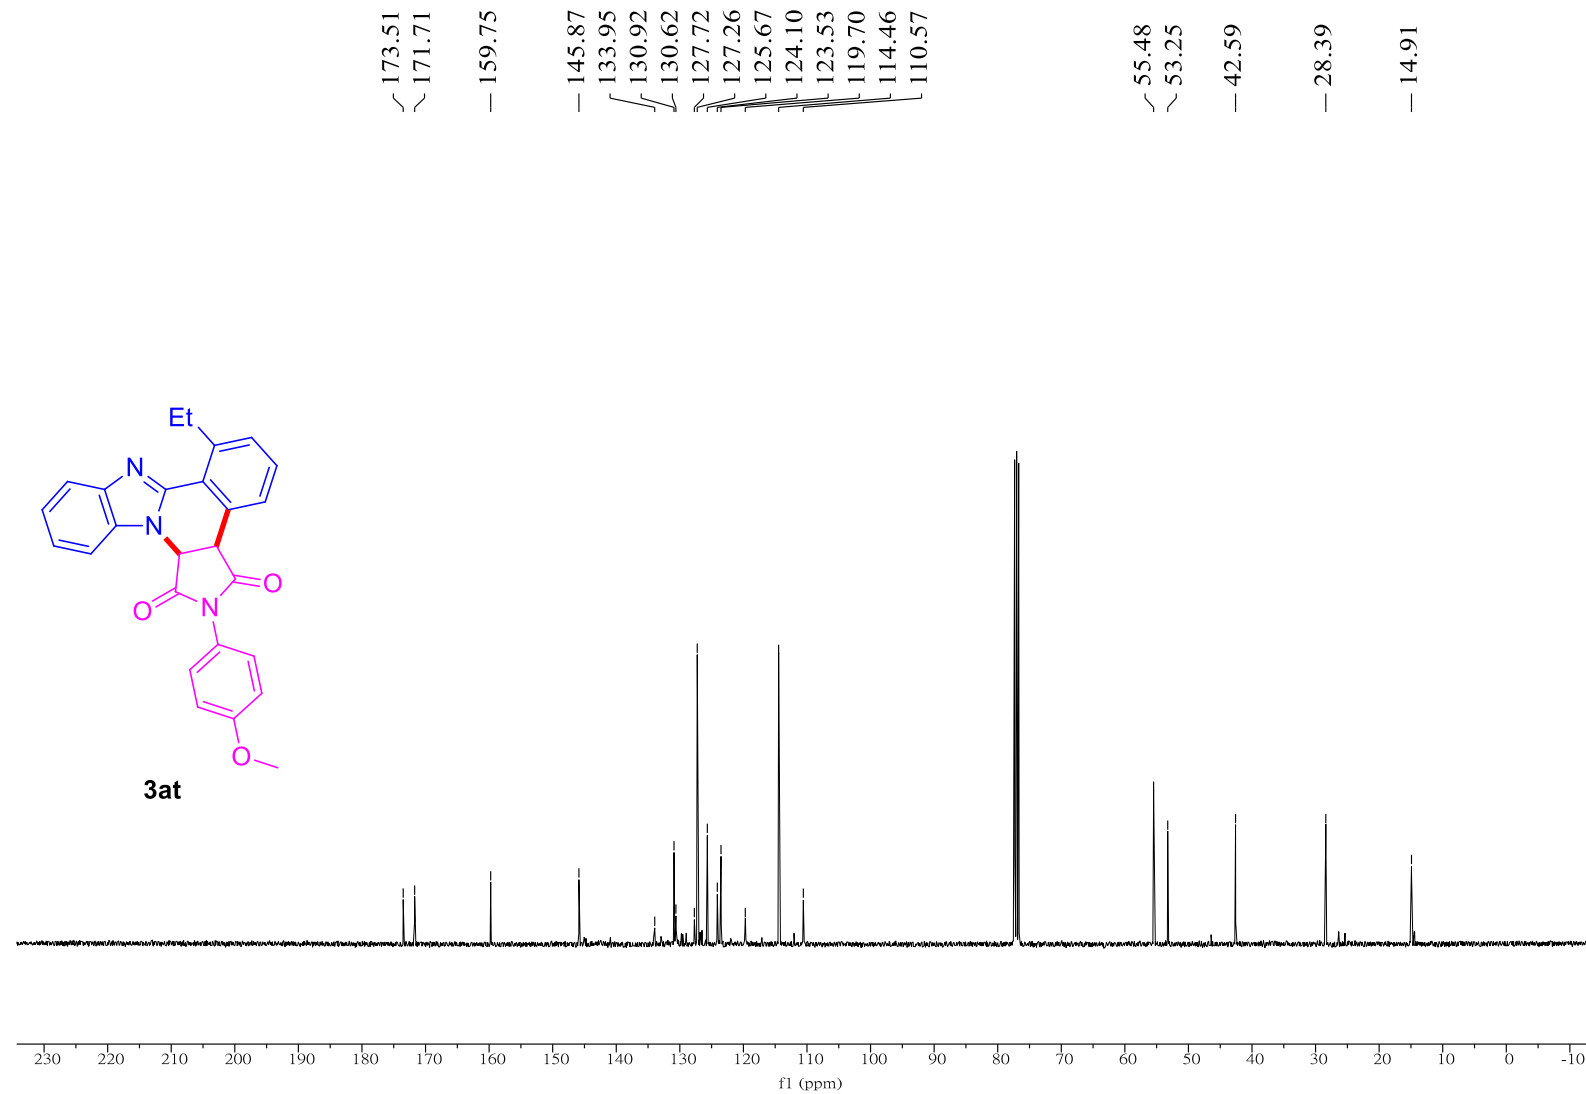

$^{13}\text{C}$  NMR spectrum (100 MHz) of compound **3at** in  $\text{CDCl}_3$ .

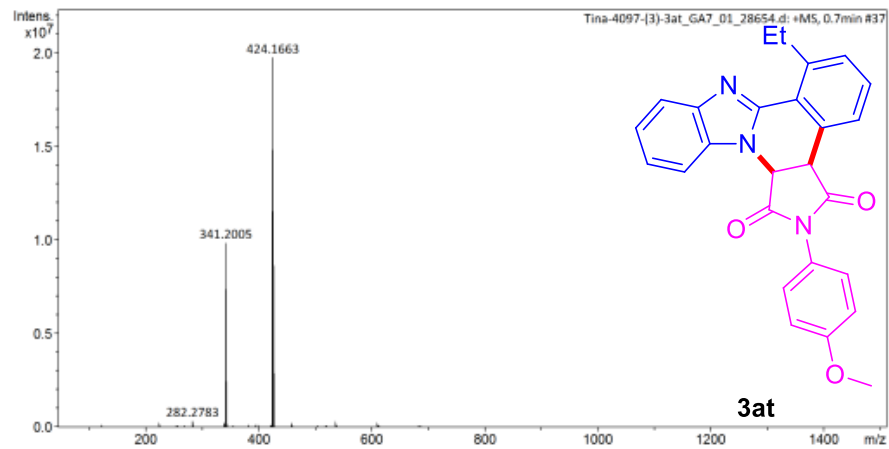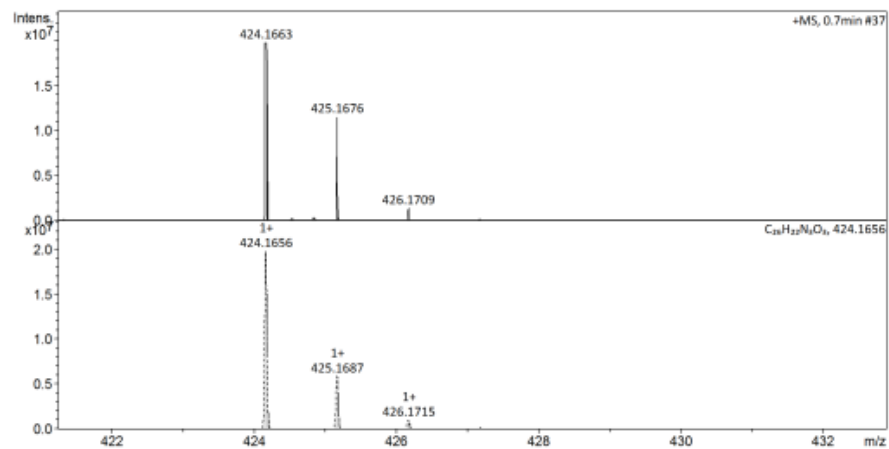

### Display Report

| Meas. m/z | # | Ion Formula                                                   | m/z      | err [ppm] | mSigma | # Sigma | Score  | rdb  | e <sup>-</sup> Conf | N-Rule | Adduct |
|-----------|---|---------------------------------------------------------------|----------|-----------|--------|---------|--------|------|---------------------|--------|--------|
| 424.1663  | 1 | C <sub>26</sub> H <sub>22</sub> N <sub>3</sub> O <sub>3</sub> | 424.1656 | -1.7      | 143.9  | 1       | 100.00 | 17.5 | even                | ok     | M+H    |

HRMS (ESI) of compound **3at**.

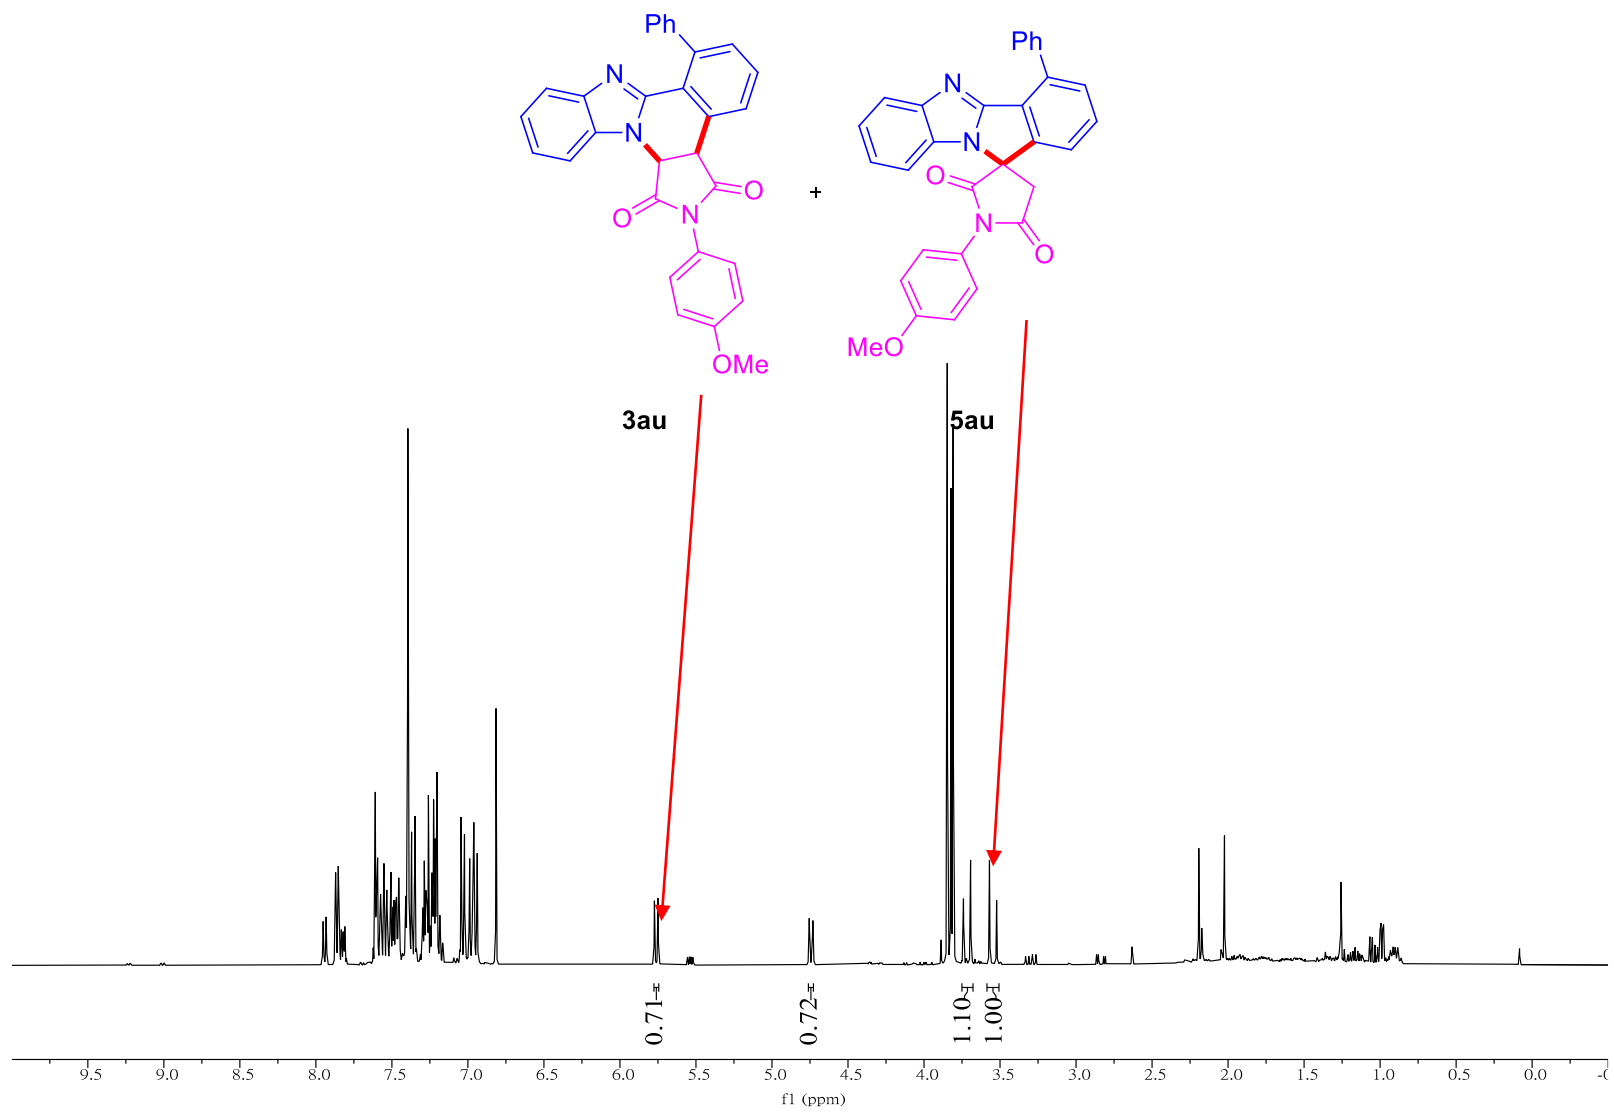

$^1\text{H}$  NMR spectrum (400 MHz) of compound **3au** and **5au** in  $\text{CDCl}_3$ .

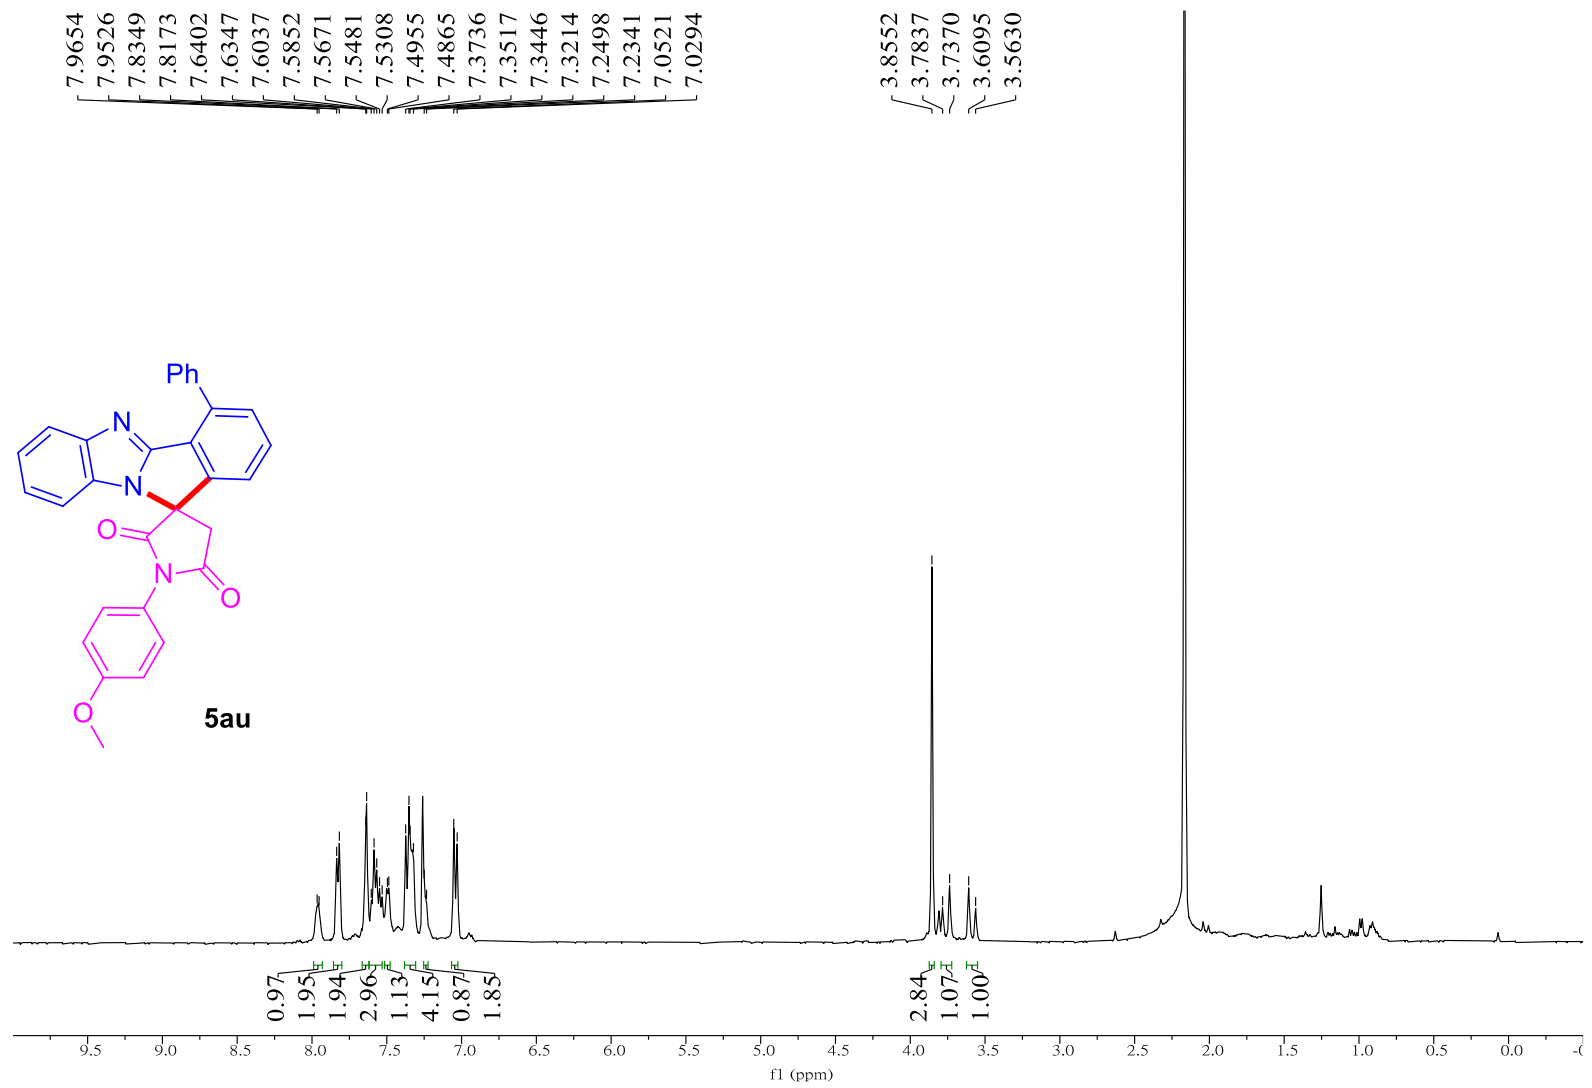

<sup>1</sup>H NMR spectrum (400 MHz) of compound **5au** in CDCl<sub>3</sub>.

CARBON\_01  
20220215-Tina-4098-3-4\_2-C-1 hr

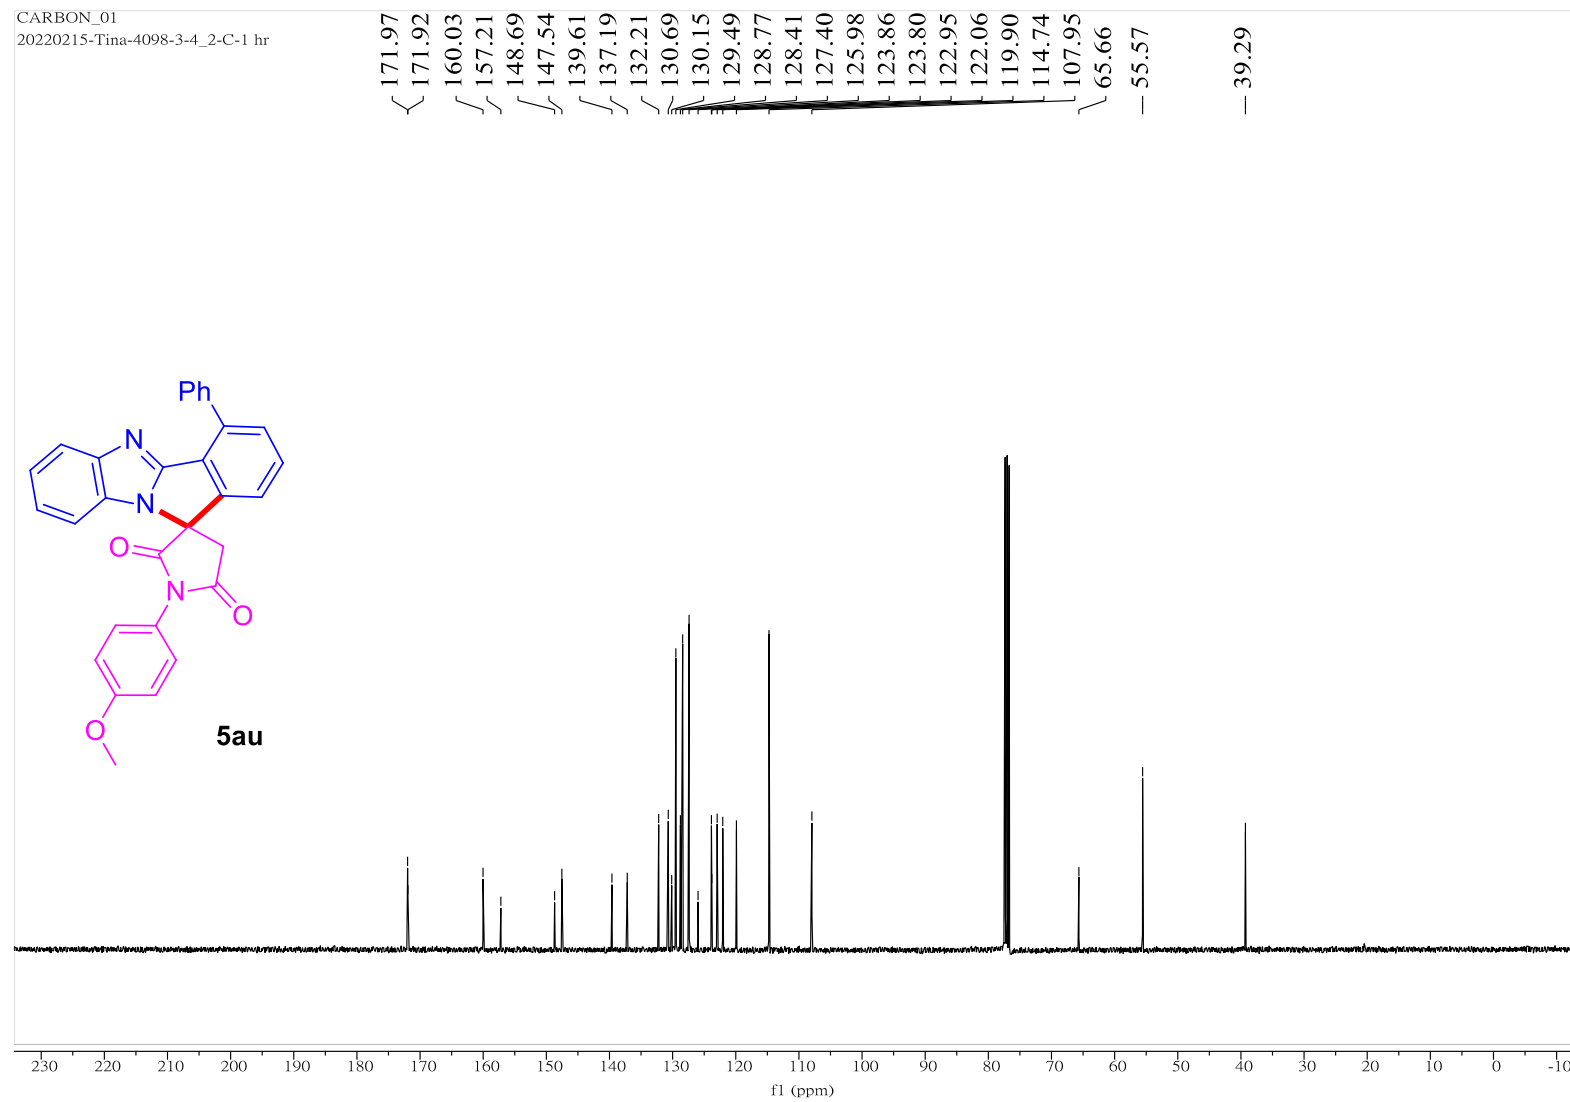

$^{13}\text{C}$  NMR spectrum (100 MHz) of compound **5au** in  $\text{CDCl}_3$ .

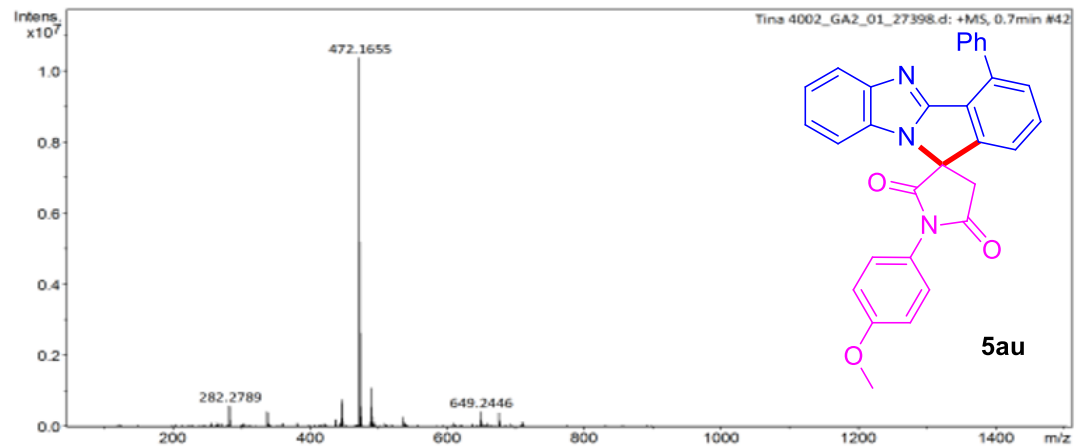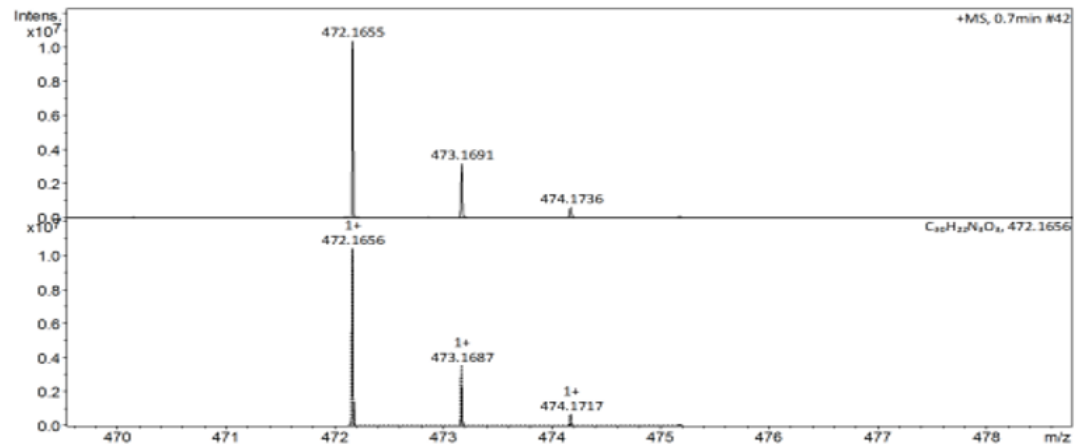

### Display Report

| Meas. m/z | # | Ion Formula                                                   | m/z      | err [ppm] | mSigma | # Sigma | Score  | rdb  | e <sup>-</sup> Conf | N-Rule | Adduct |
|-----------|---|---------------------------------------------------------------|----------|-----------|--------|---------|--------|------|---------------------|--------|--------|
| 472.1655  | 1 | C <sub>30</sub> H <sub>22</sub> N <sub>3</sub> O <sub>3</sub> | 472.1656 | -0.1      | 17.7   | 1       | 100.00 | 21.5 | even                | ok     | M+H    |

HRMS (ESI) of compound **5au**.

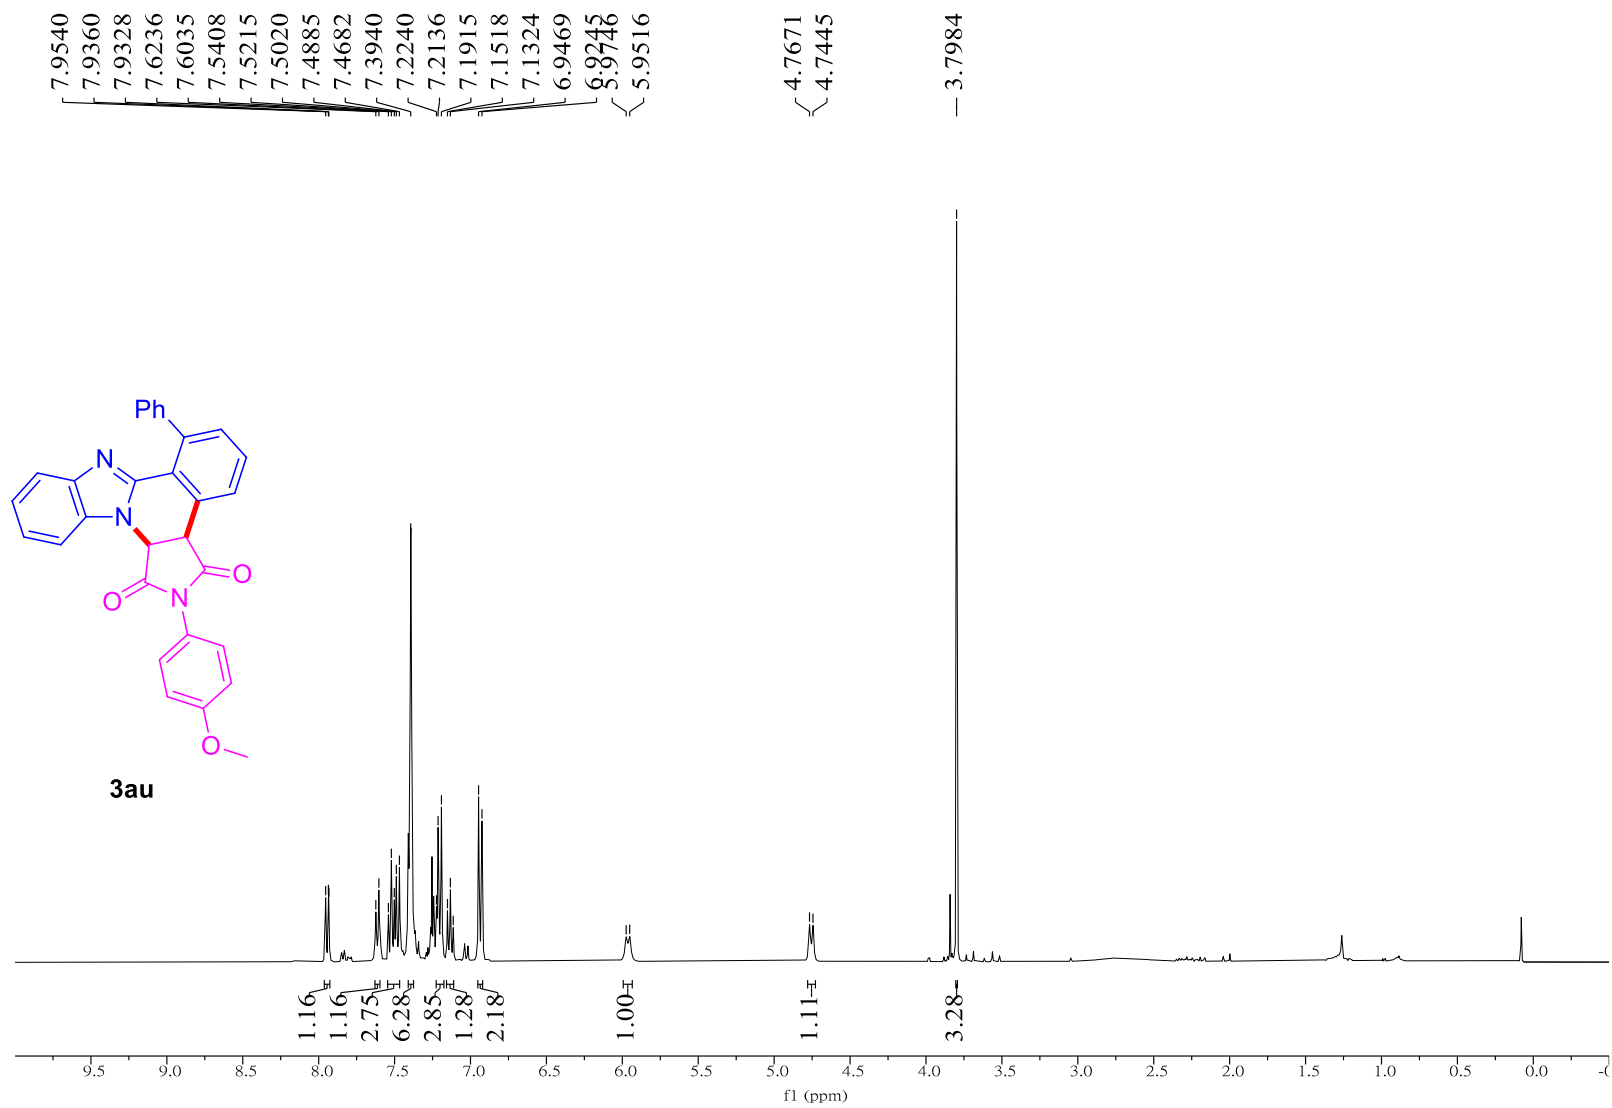

$^1\text{H}$  NMR spectrum (400 MHz) of compound **3au** in  $\text{CDCl}_3$ .



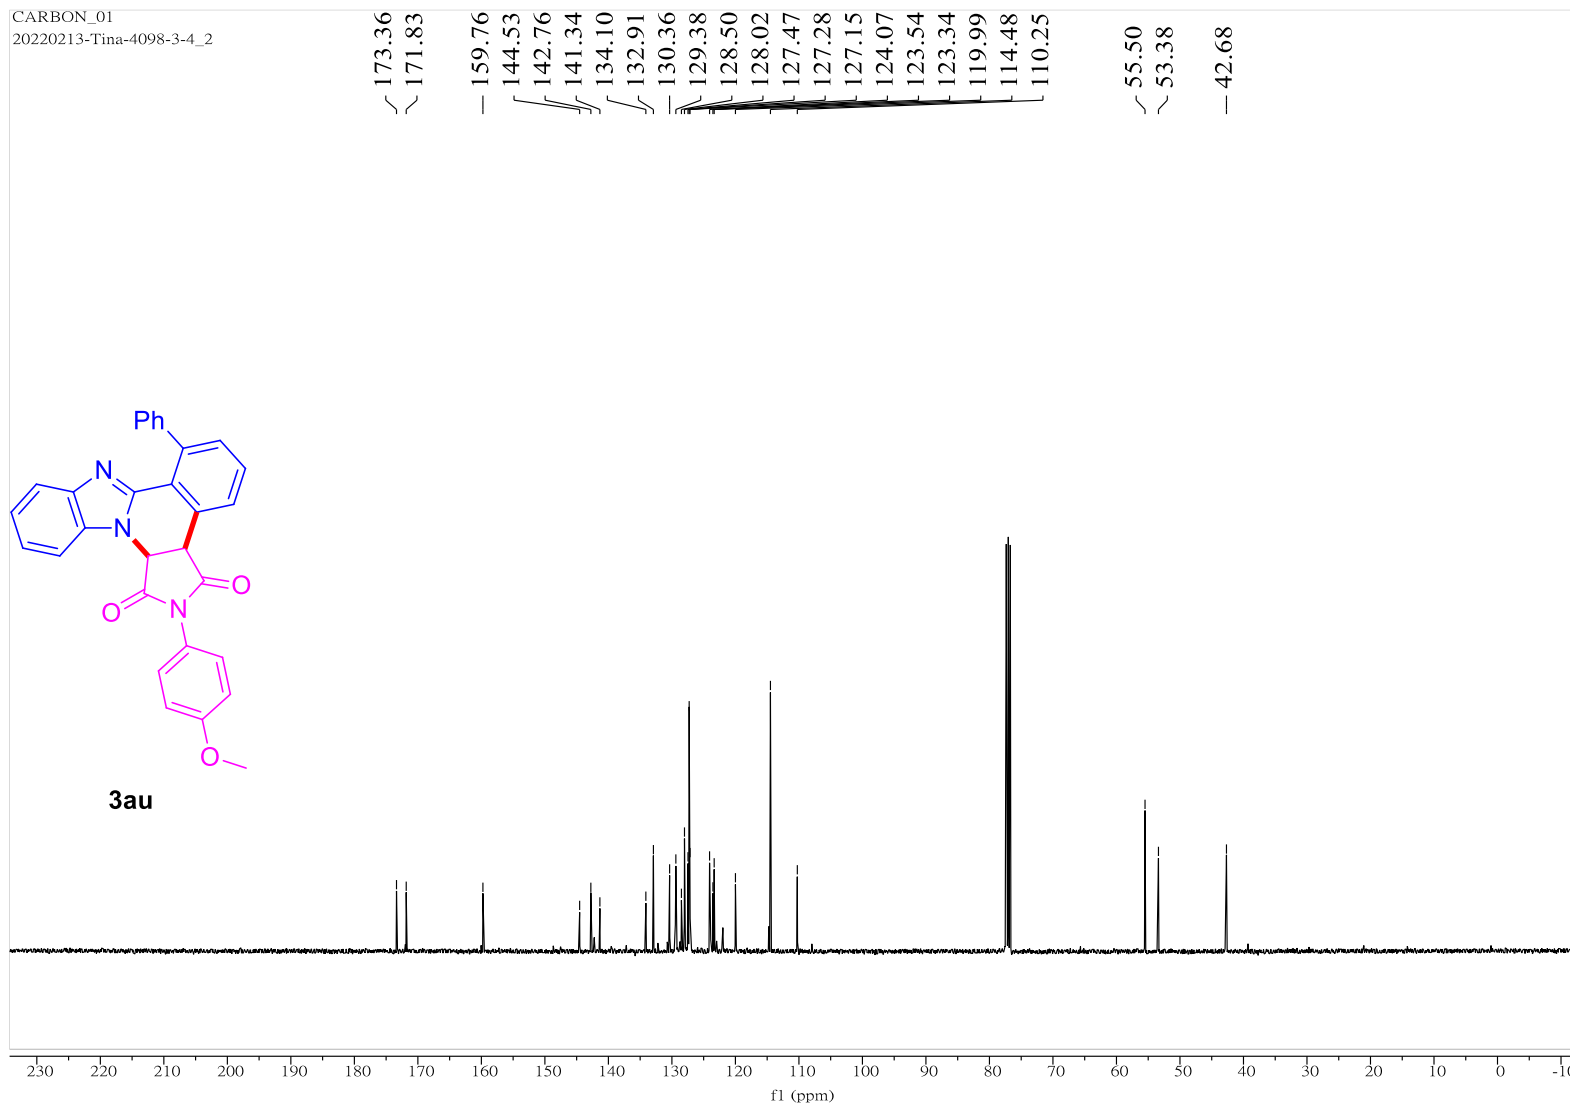

$^{13}\text{C}$  NMR spectrum (100 MHz) of compound **3au** in  $\text{CDCl}_3$ .

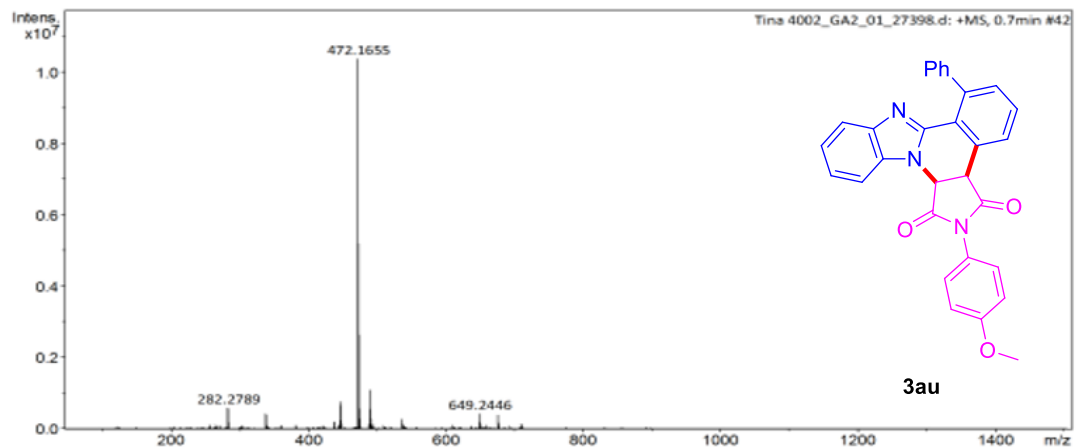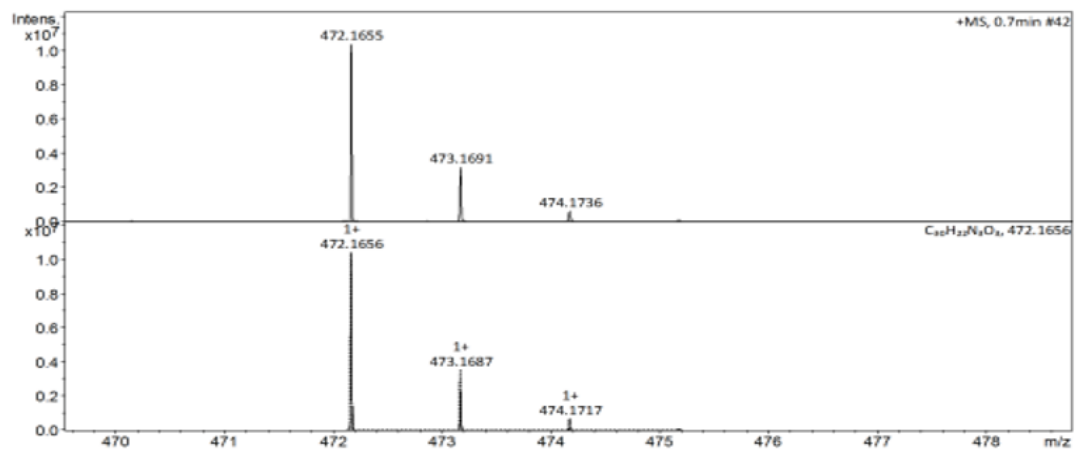

### Display Report

| Meas. m/z | # | Ion Formula                                                   | m/z      | err [ppm] | mSigma | # Sigma | Score  | rdb  | e <sup>-</sup> Conf | N-Rule | Adduct |
|-----------|---|---------------------------------------------------------------|----------|-----------|--------|---------|--------|------|---------------------|--------|--------|
| 472.1655  | 1 | C <sub>30</sub> H <sub>22</sub> N <sub>3</sub> O <sub>3</sub> | 472.1656 | -0.1      | 17.7   | 1       | 100.00 | 21.5 | even                | ok     | M+H    |

HRMS (ESI) of compound **3au**.

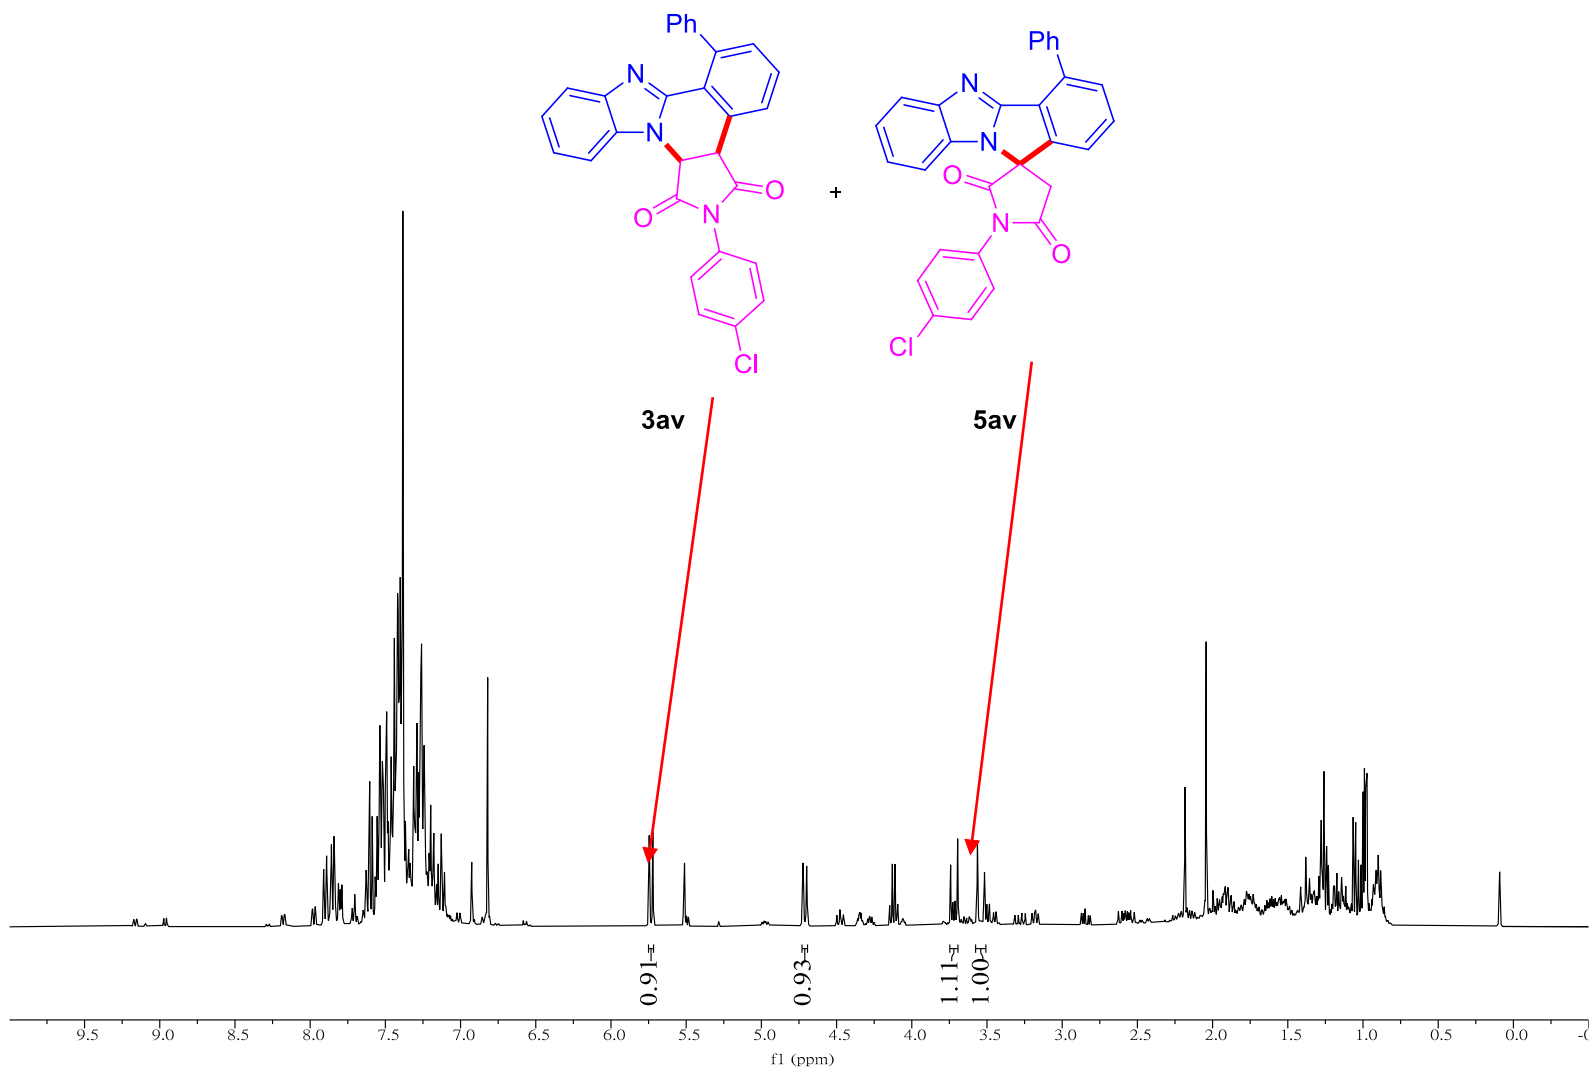

$^1\text{H}$  NMR spectrum (400 MHz) of compound **3av** and **5av** in  $\text{CDCl}_3$ .

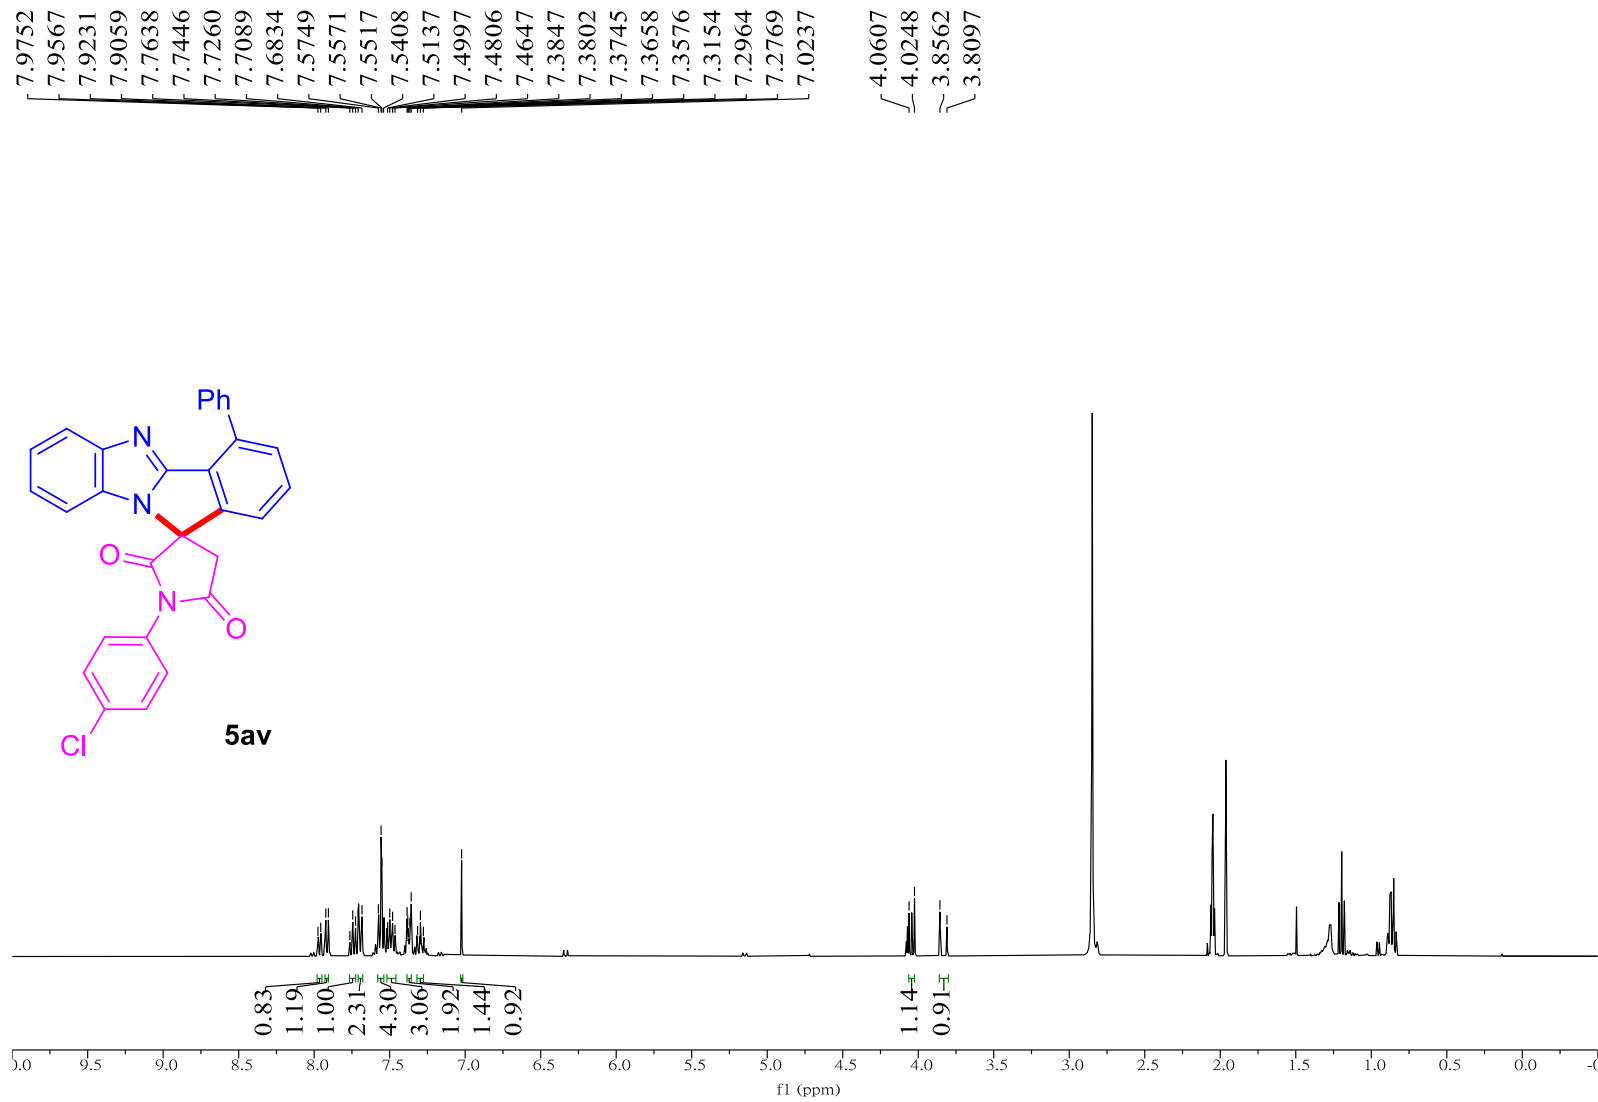

$^1\text{H}$  NMR spectrum (400 MHz) of compound **5av** in  $\text{CDCl}_3$ .

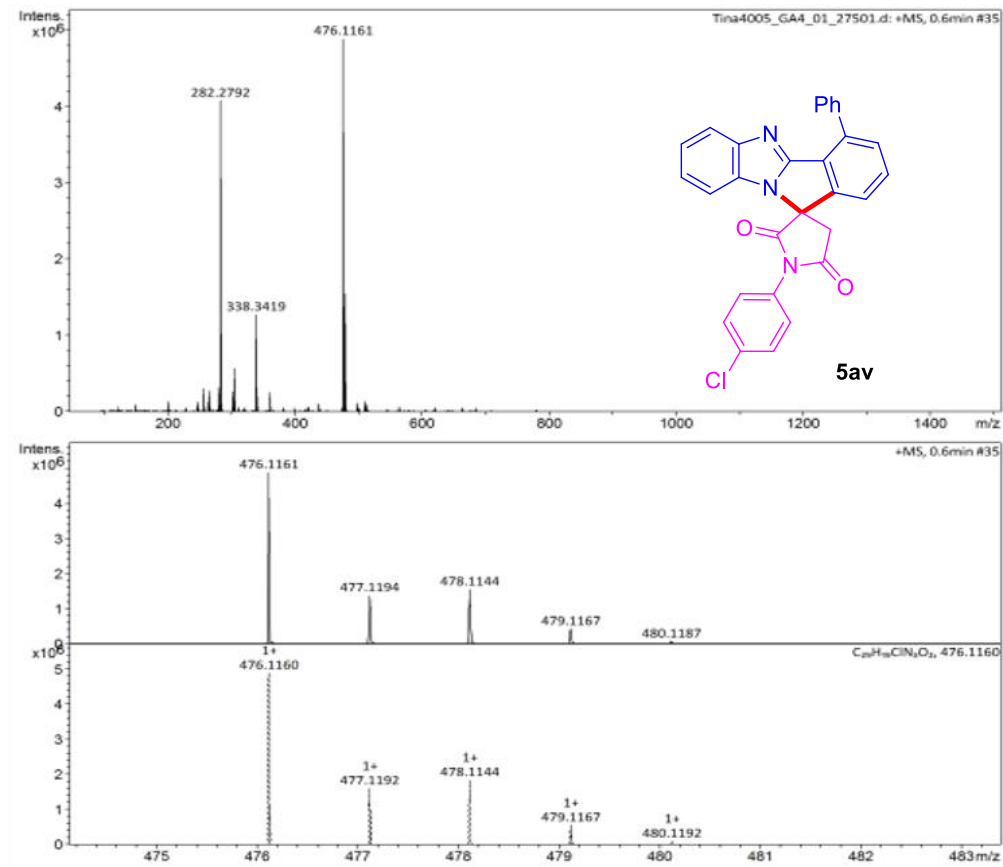

### Display Report

| Meas. m/z | # | Ion Formula                                                     | m/z      | err [ppm] | mSigma | # Sigma | Score  | rdb  | e <sup>-</sup> Conf | N-Rule | Adduct |
|-----------|---|-----------------------------------------------------------------|----------|-----------|--------|---------|--------|------|---------------------|--------|--------|
| 476.1161  | 1 | C <sub>29</sub> H <sub>19</sub> ClN <sub>3</sub> O <sub>2</sub> | 476.1160 | -0.1      | 35.2   | 1       | 100.00 | 21.5 | even                | ok     | M+H    |

HRMS (ESI) of compound **5av**.

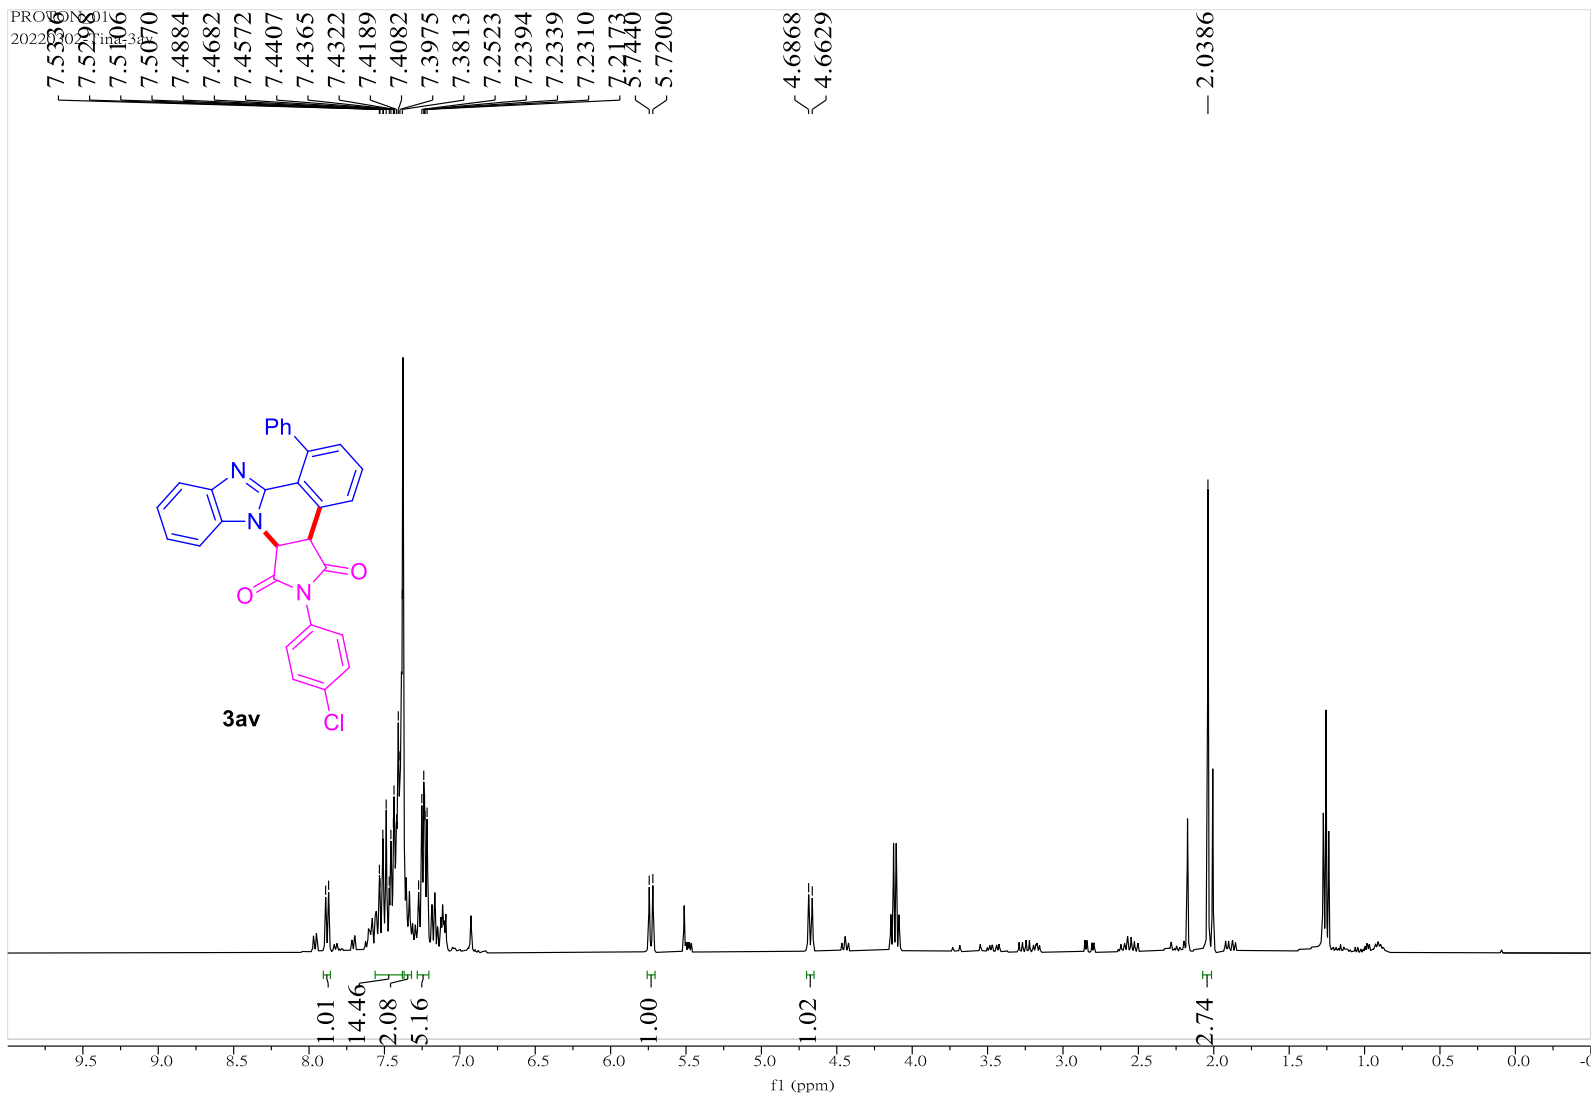

<sup>1</sup>H NMR spectrum (400 MHz) of compound **3av** in CDCl<sub>3</sub>.

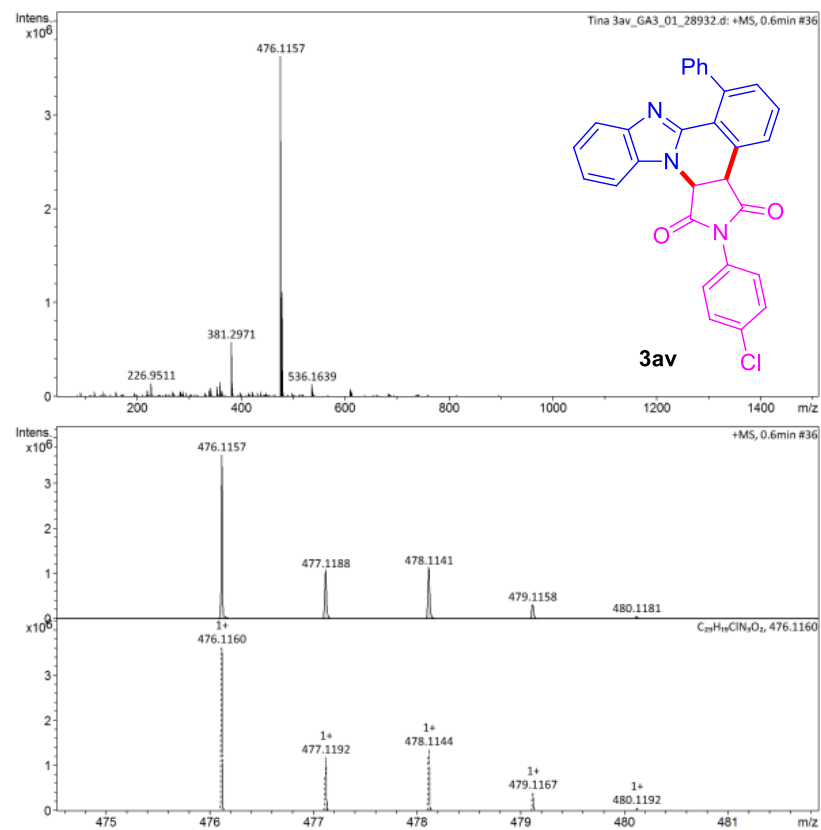

## Display Report

| Meas. m/z | # | Ion Formula                                                     | m/z      | err [ppm] | mSigma | # Sigma | Score  | rdb  | e <sup>-</sup> Conf | N-Rule | Adduct |
|-----------|---|-----------------------------------------------------------------|----------|-----------|--------|---------|--------|------|---------------------|--------|--------|
| 476.1157  | 1 | C <sub>29</sub> H <sub>19</sub> ClN <sub>3</sub> O <sub>2</sub> | 476.1160 | -0.7      | 36.7   | 1       | 100.00 | 21.5 | even                | ok     | M+H    |

HRMS (ESI) of compound **3av**.

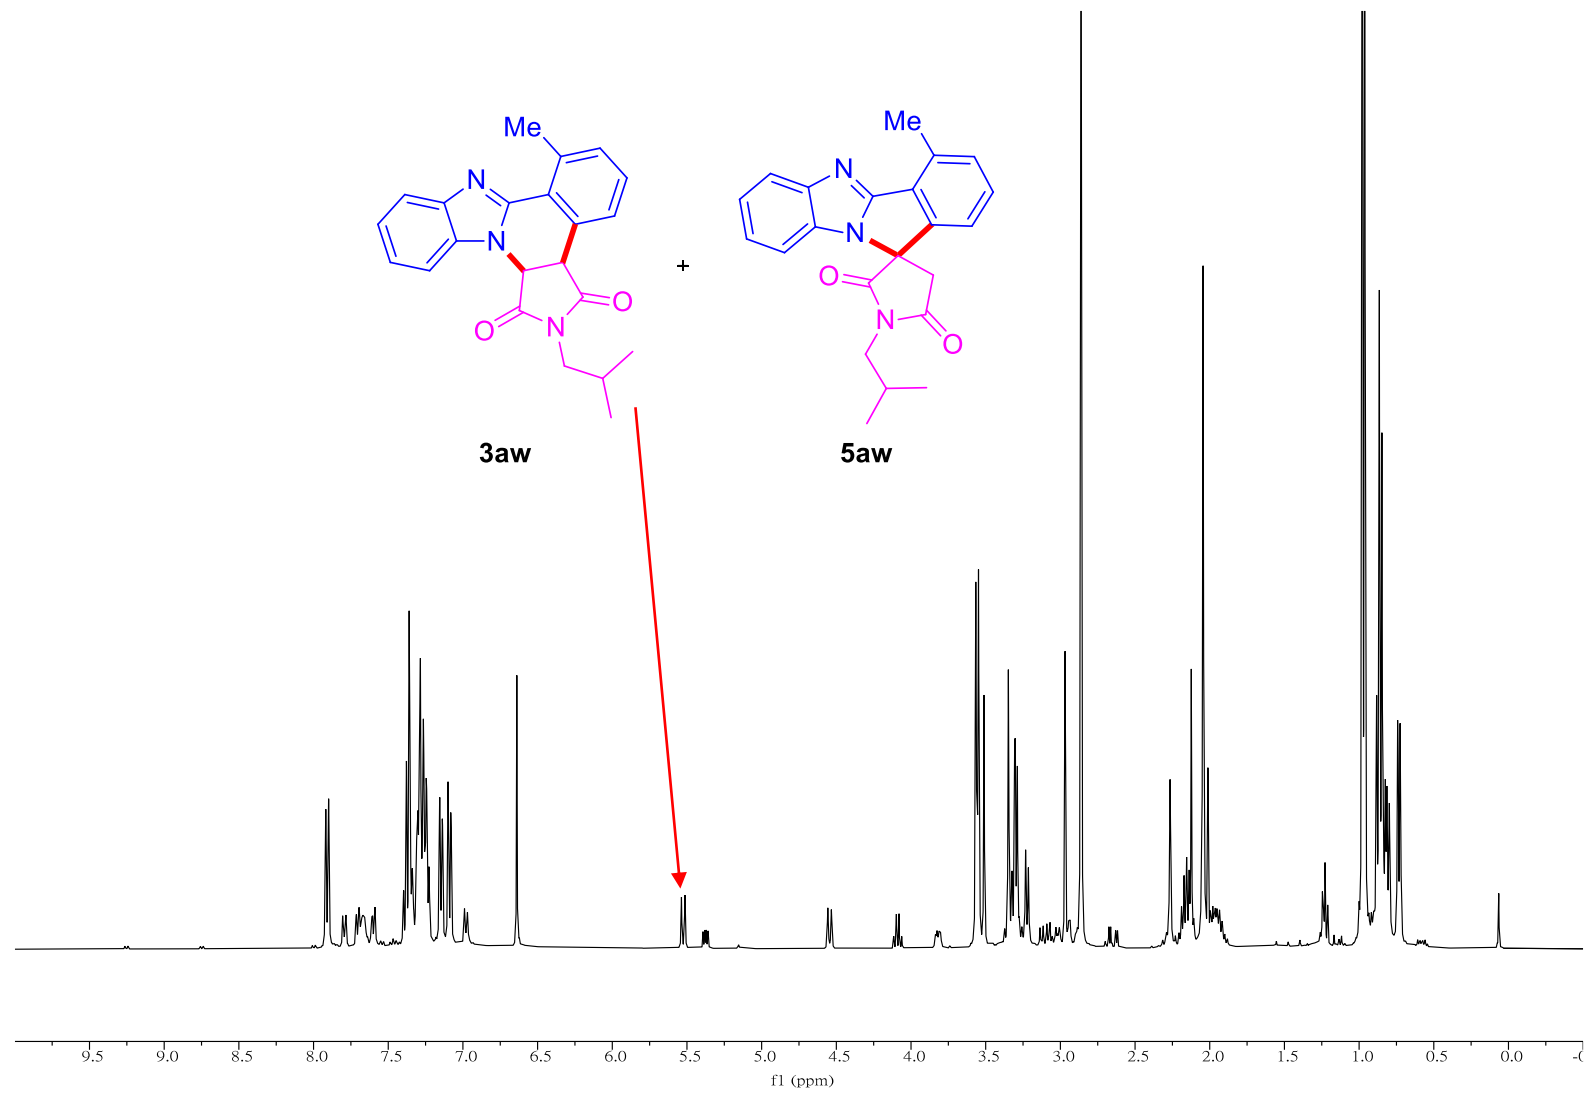

<sup>1</sup>H NMR spectrum (400 MHz) of compound **3aw** and **5aw** in CDCl<sub>3</sub>.



PROTON\_01  
20201115-HYT-3014-data

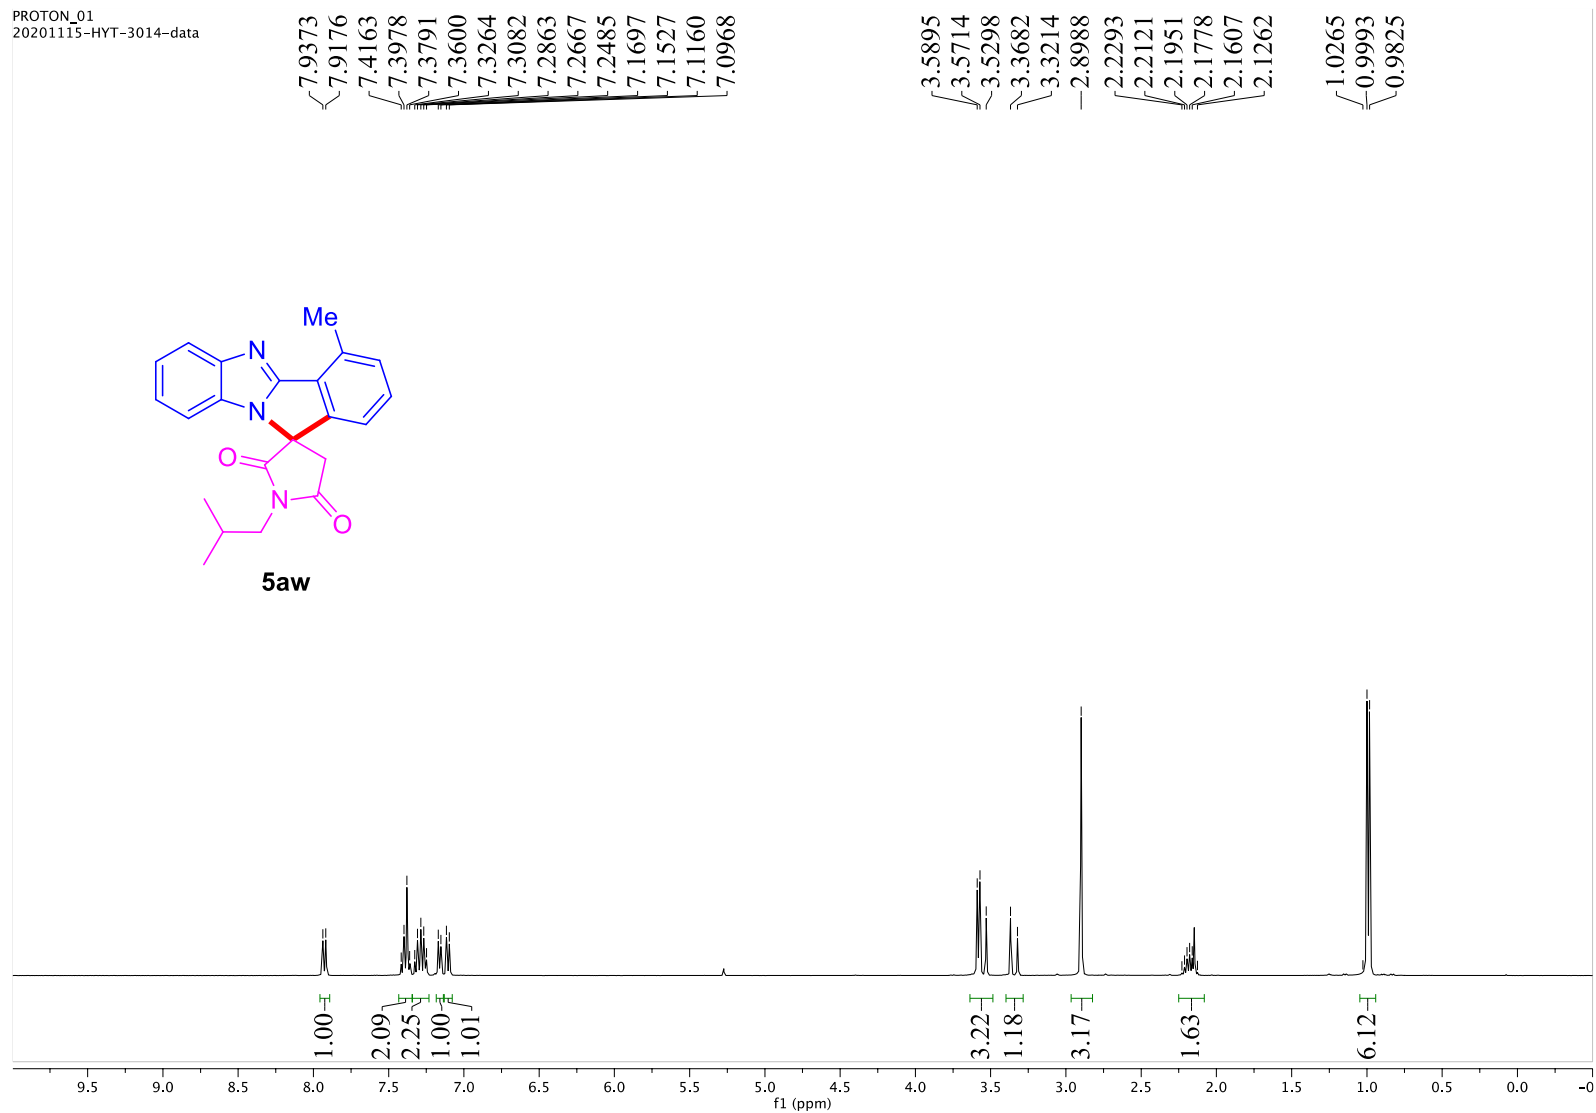

<sup>1</sup>H NMR spectrum (400 MHz) of compound **5aw** in CDCl<sub>3</sub>.

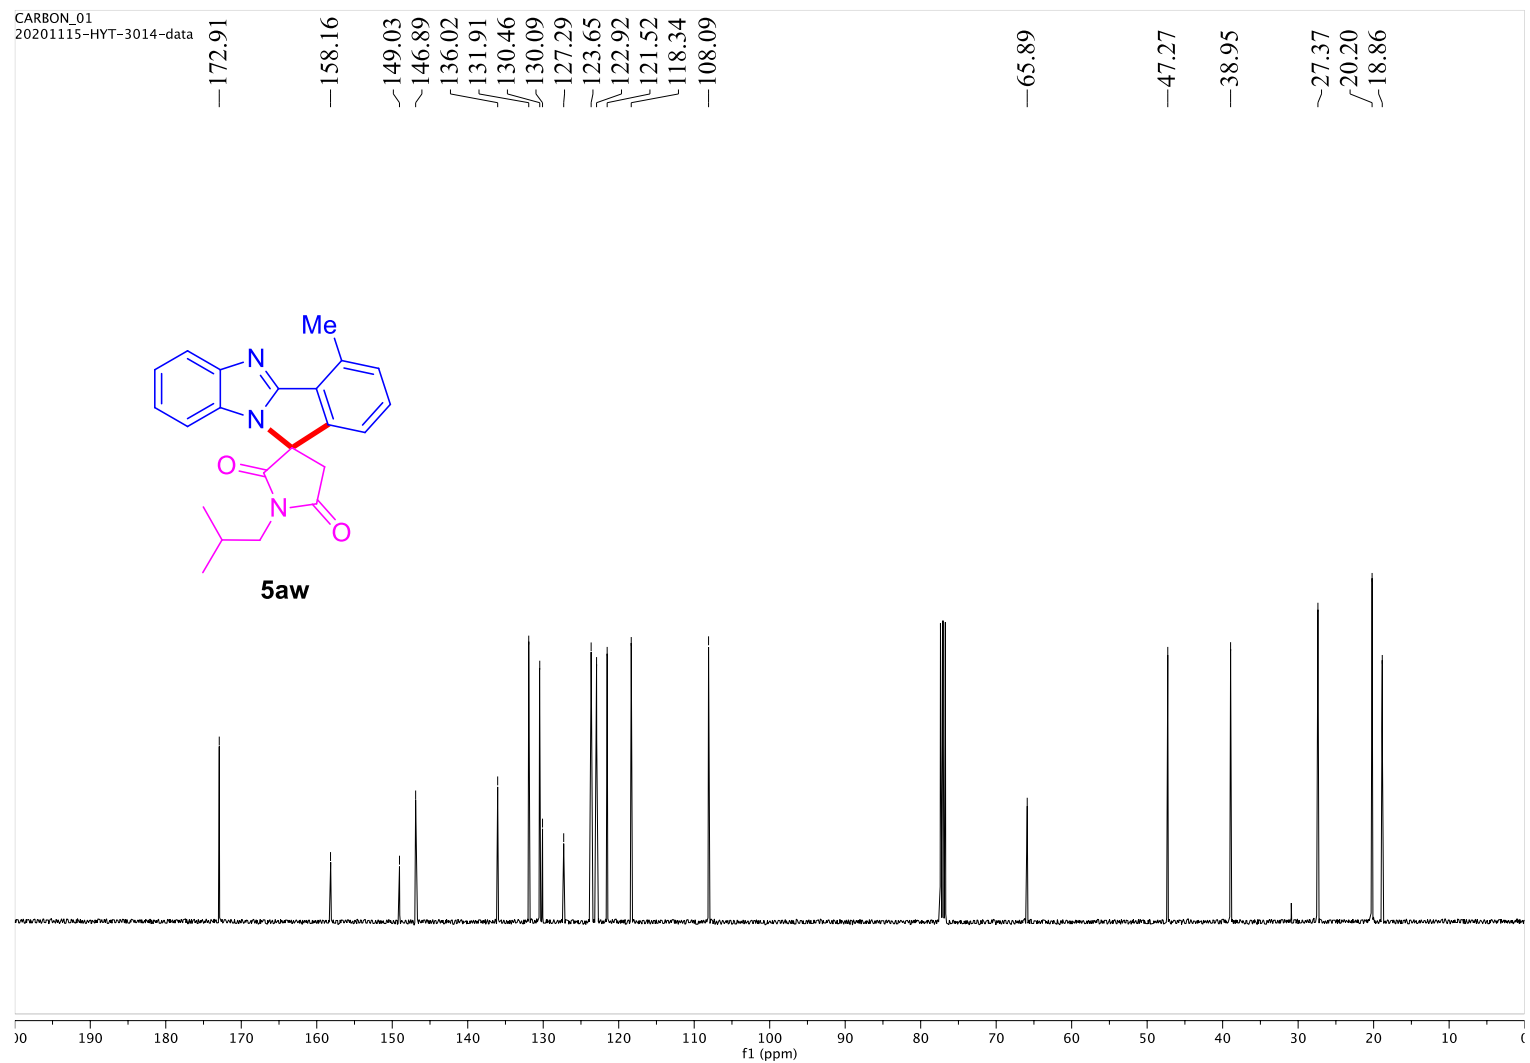

$^{13}\text{C}$  NMR spectrum (100 MHz) of compound **5aw** in  $\text{CDCl}_3$ .

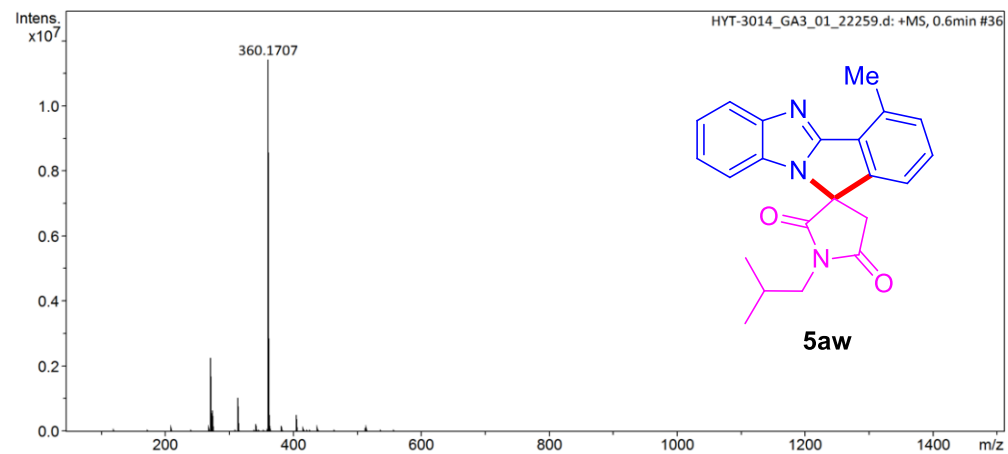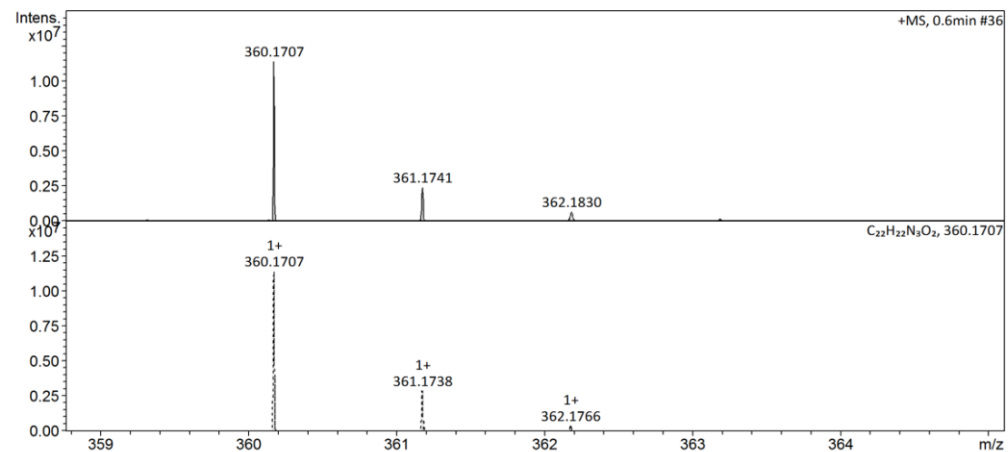

## Display Report

| Meas. m/z | # | Ion Formula                                                   | m/z      | err [ppm] | mSigma | # Sigma | Score  | rdb  | e <sup>-</sup> Conf | N-Rule | Adduct |
|-----------|---|---------------------------------------------------------------|----------|-----------|--------|---------|--------|------|---------------------|--------|--------|
| 360.1707  | 1 | C <sub>22</sub> H <sub>22</sub> N <sub>3</sub> O <sub>2</sub> | 360.1707 | -0.1      | 26.9   | 1       | 100.00 | 13.5 | even                | ok     | M+H    |

HRMS (ESI) of compound **5aw**.

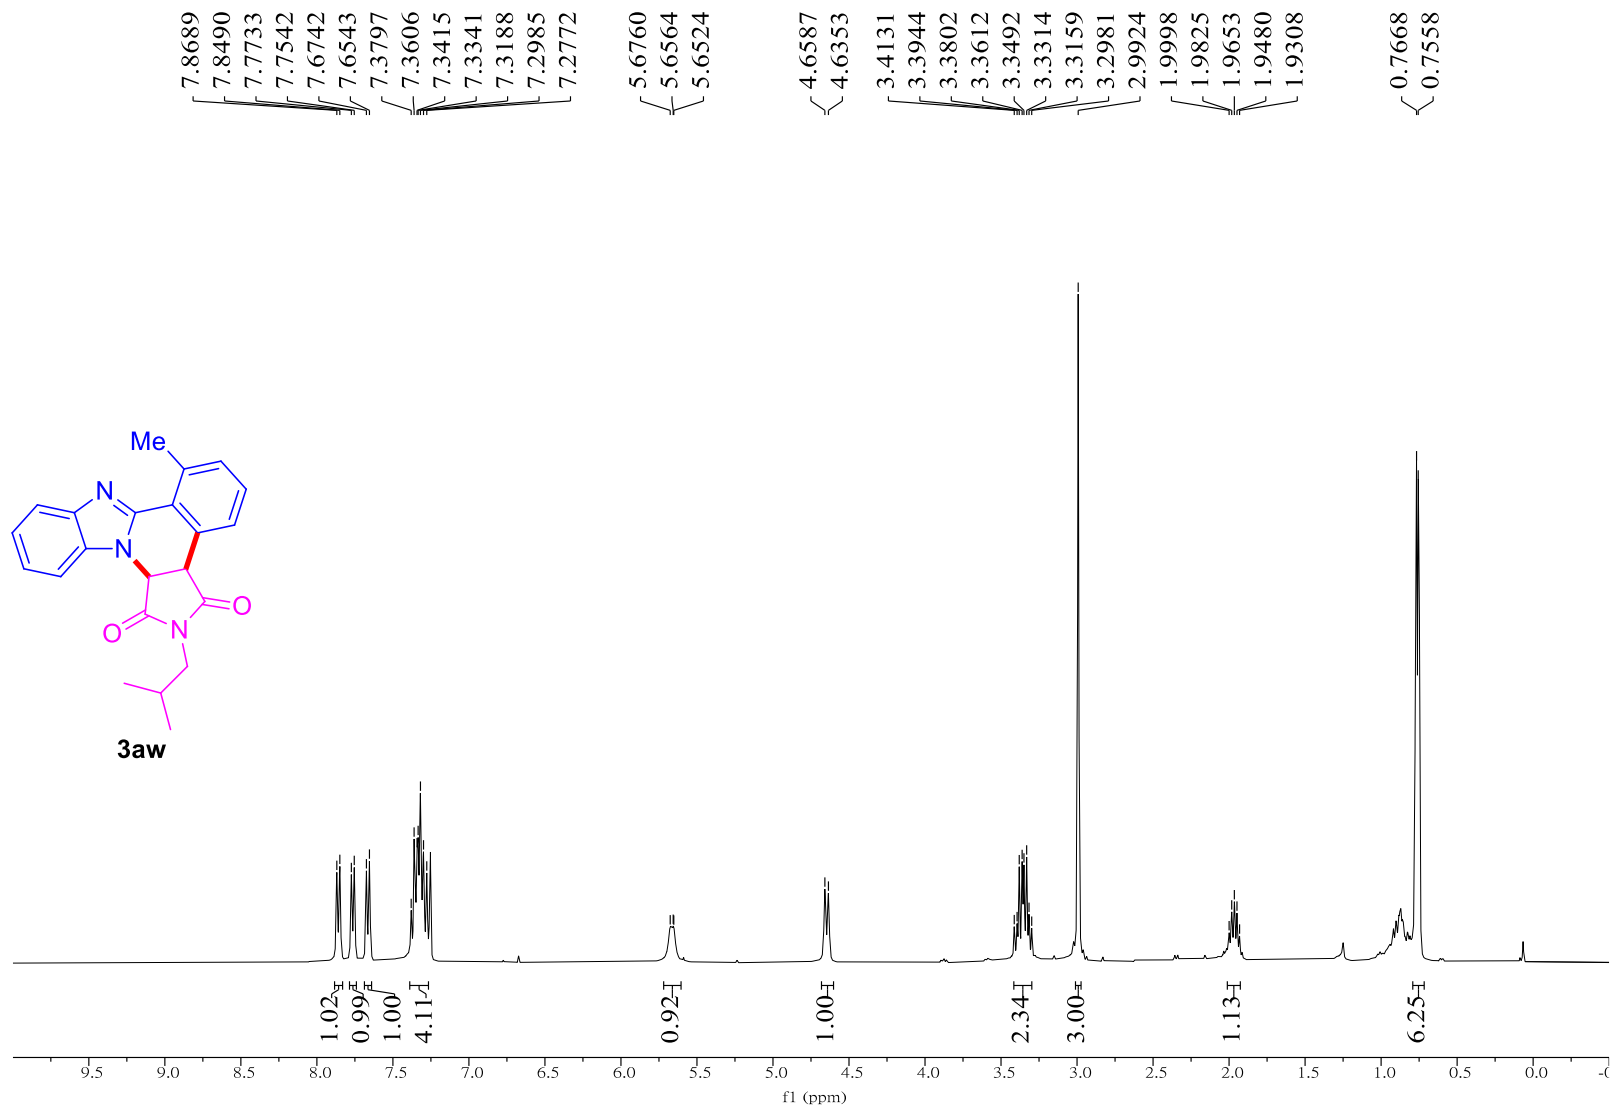

$^1\text{H}$  NMR spectrum (400 MHz) of compound **3aw** in  $\text{CDCl}_3$ .

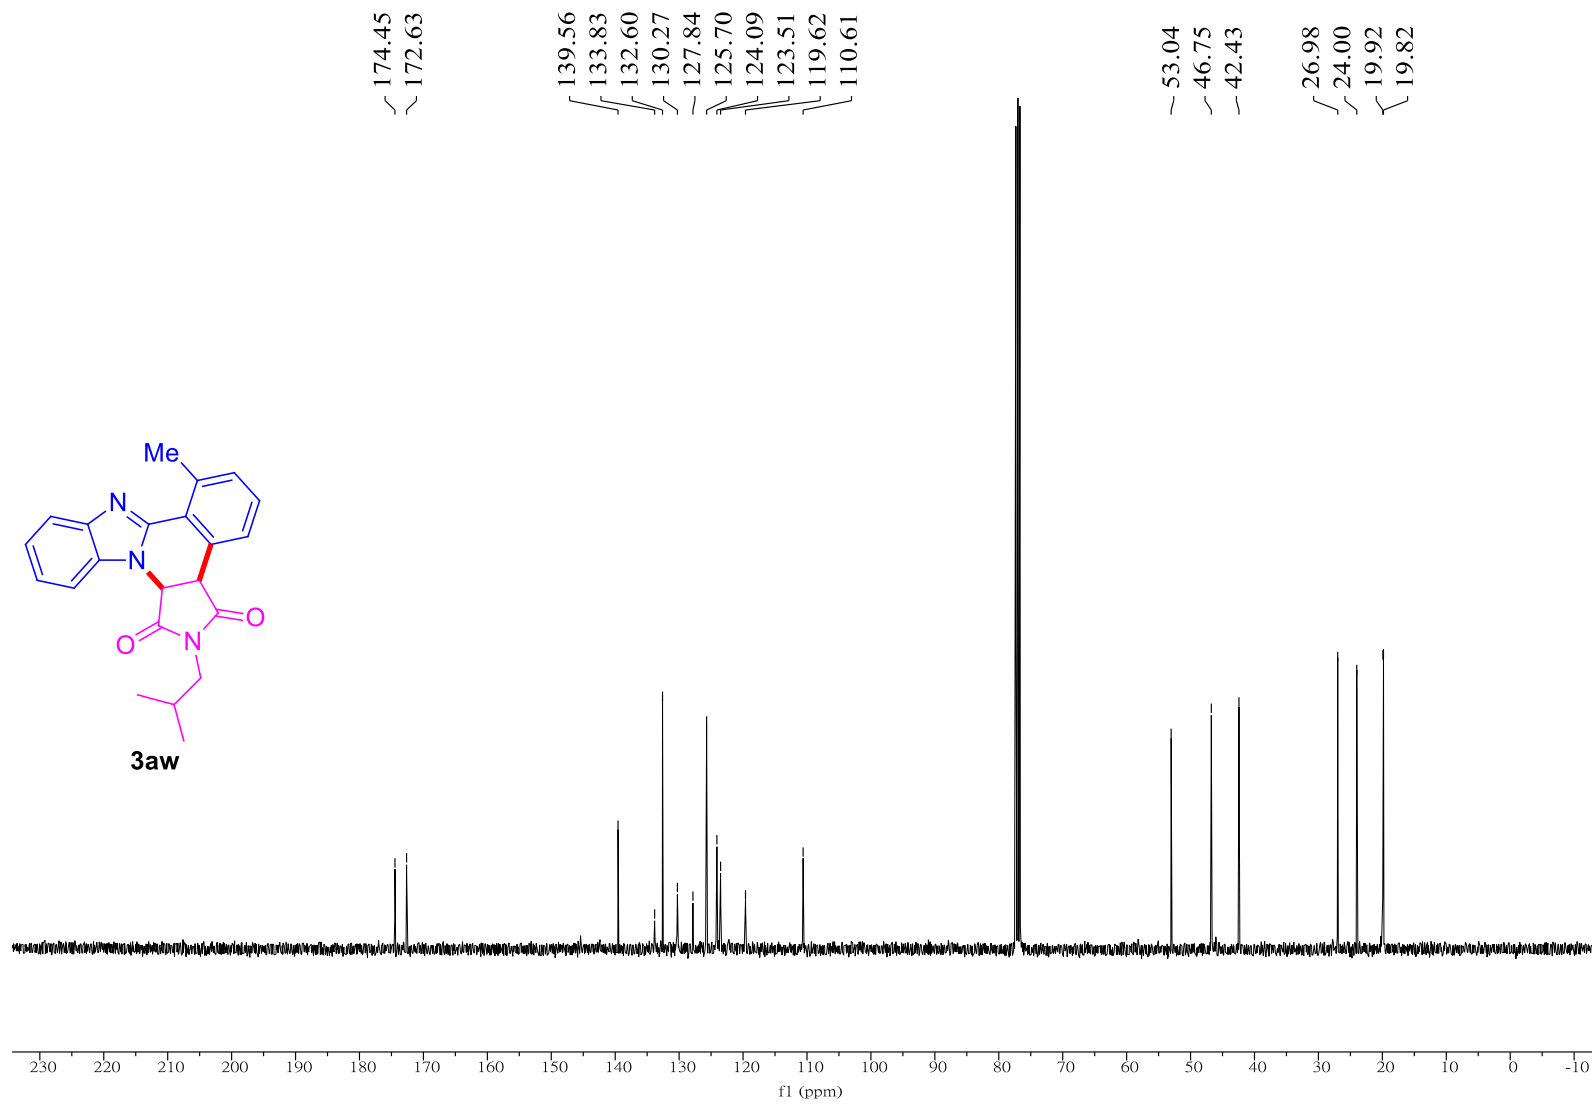

$^{13}\text{C}$  NMR spectrum (100 MHz) of compound **3aw** in  $\text{CDCl}_3$ .

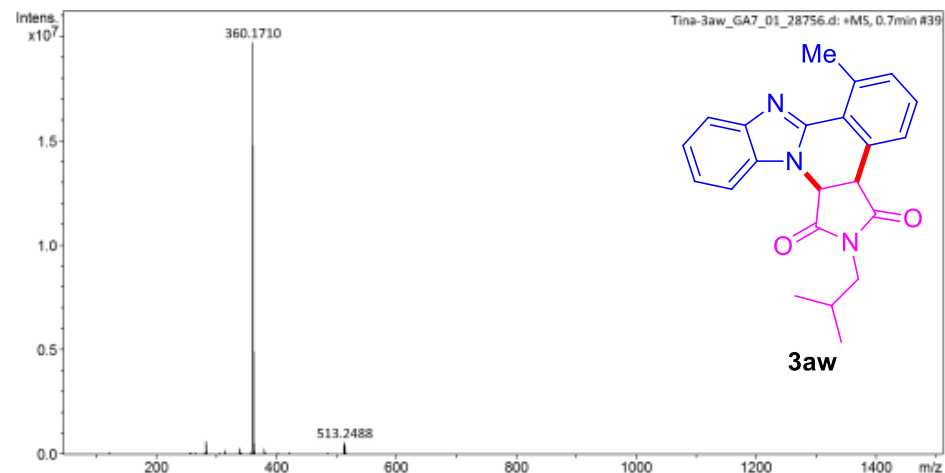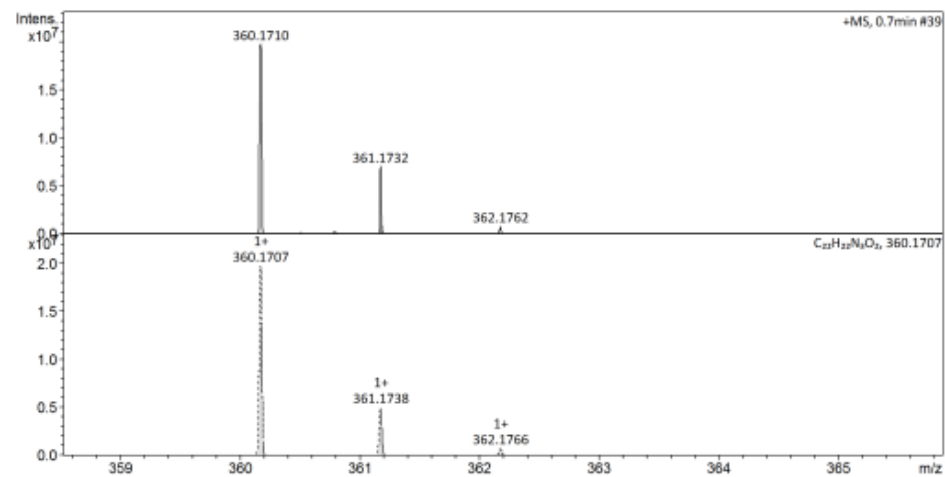

### Display Report

| Meas. m/z | # | Ion Formula                                                   | m/z      | err [ppm] | mSigma | # Sigma | Score  | rdB  | e <sup>-</sup> Conf | N-Rule | Adduct |
|-----------|---|---------------------------------------------------------------|----------|-----------|--------|---------|--------|------|---------------------|--------|--------|
| 360.1710  | 1 | C <sub>22</sub> H <sub>22</sub> N <sub>3</sub> O <sub>2</sub> | 360.1707 | 0.8       | 58.3   | 1       | 100.00 | 13.5 | even                | ok     | M+H    |

HRMS (ESI) of compound **3aw**.

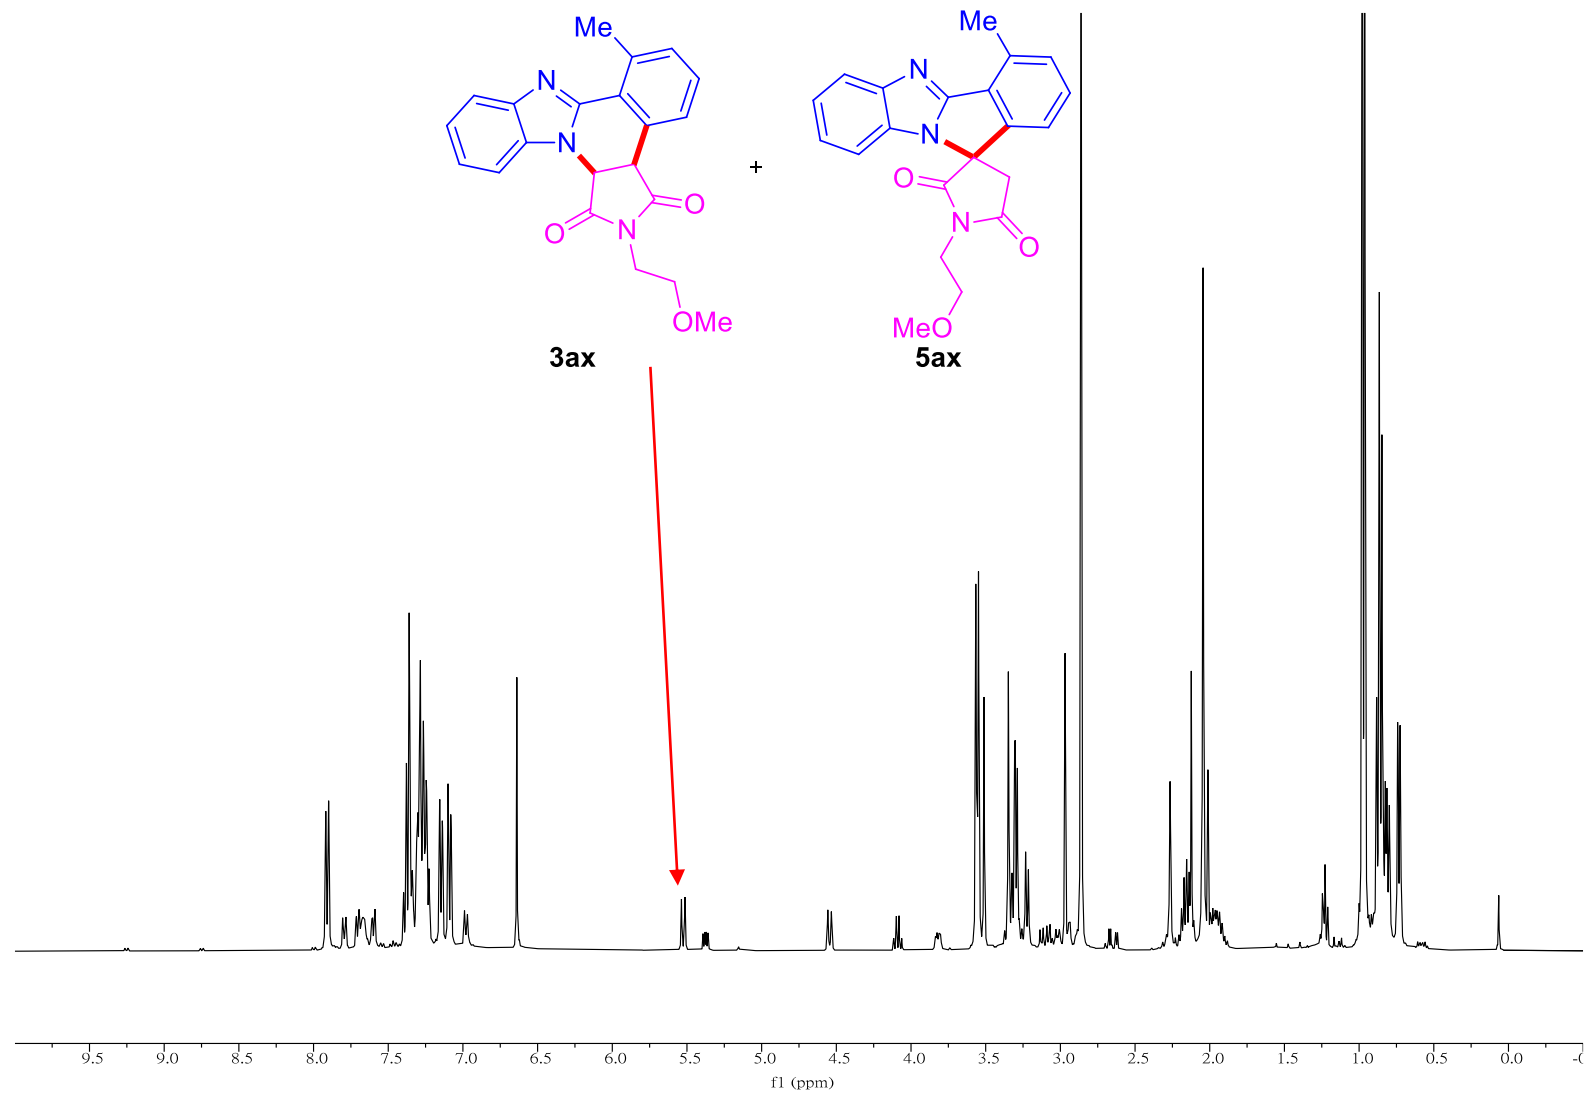

<sup>1</sup>H NMR spectrum (400 MHz) of compound **3ax** and **5ax** (ratio) in CDCl<sub>3</sub>.

PROTON\_01  
20200914-HYT-2073-spiro

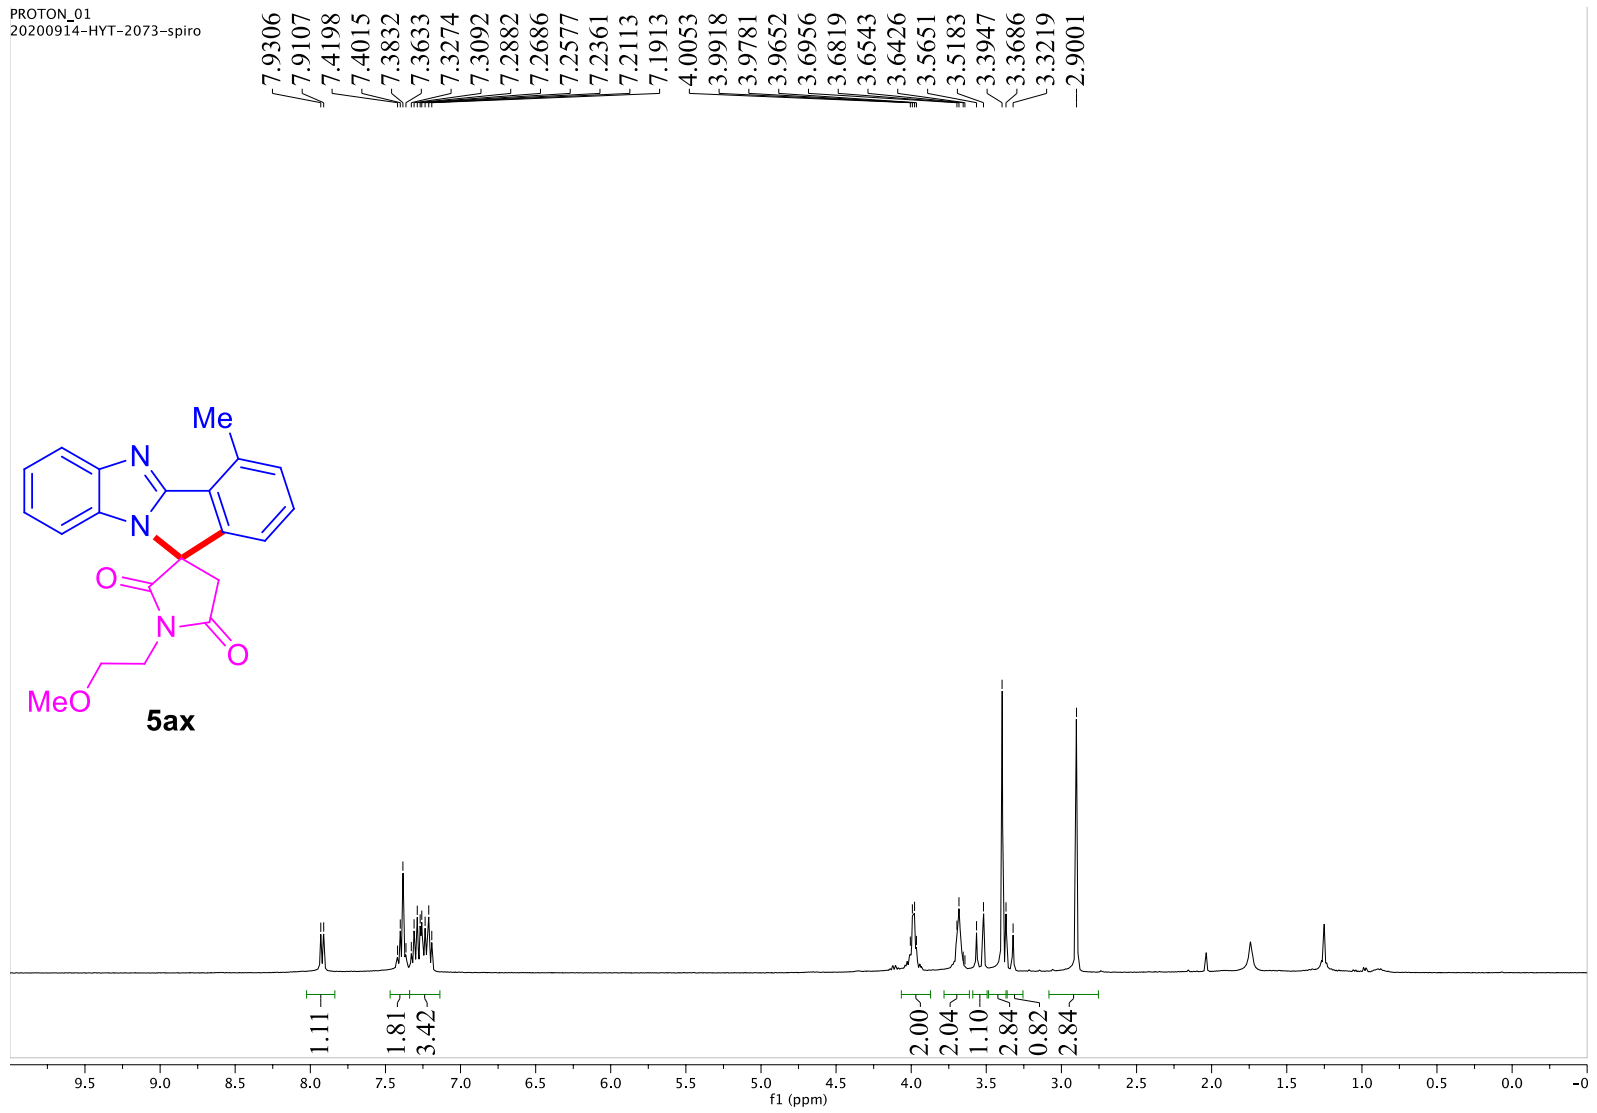

<sup>1</sup>H NMR spectrum (400 MHz) of compound **5ax** in CDCl<sub>3</sub>.



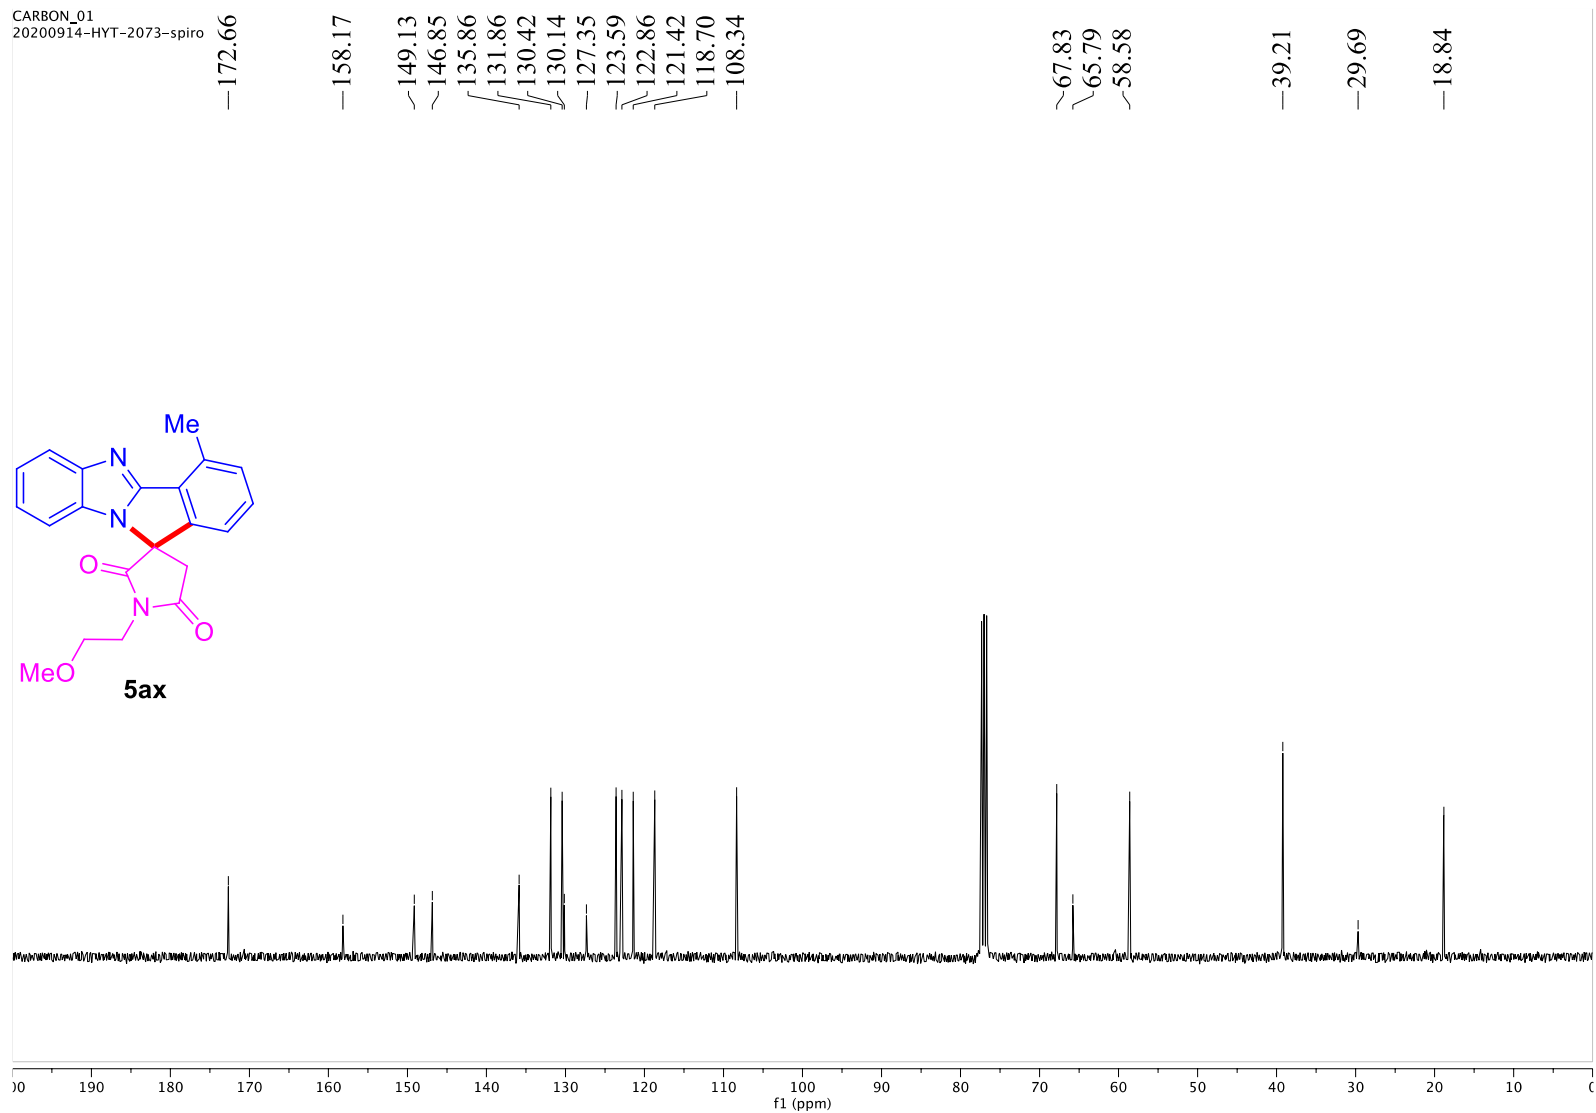

<sup>13</sup>C NMR spectrum (100 MHz) of compound **5ax** in CDCl<sub>3</sub>  
281

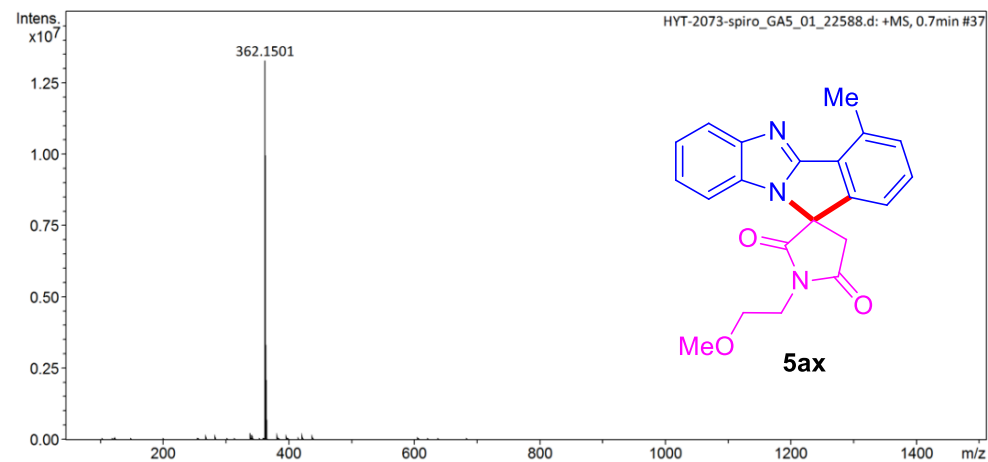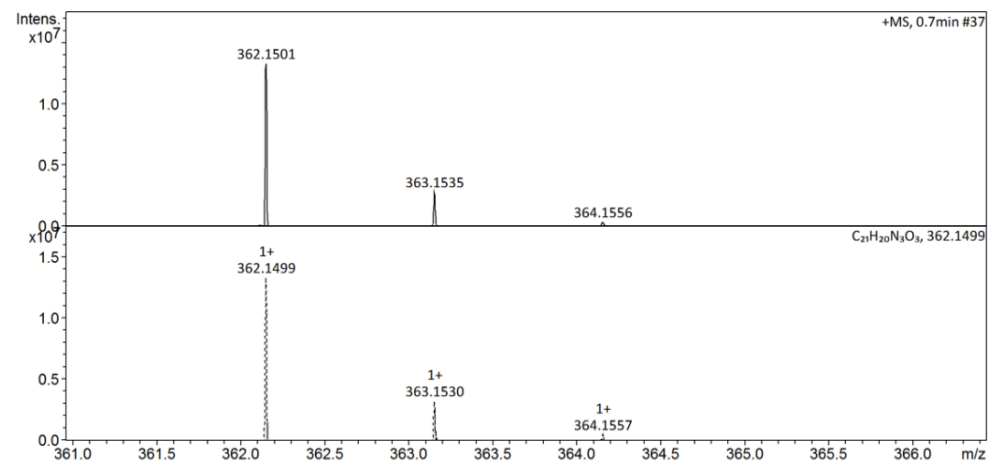

## Display Report

| Meas. m/z | # | Ion Formula                                                   | m/z      | err [ppm] | mSigma | # Sigma | Score  | rdb  | e <sup>-</sup> Conf | N-Rule | Adduct |
|-----------|---|---------------------------------------------------------------|----------|-----------|--------|---------|--------|------|---------------------|--------|--------|
| 362.1501  | 1 | C <sub>21</sub> H <sub>20</sub> N <sub>3</sub> O <sub>3</sub> | 362.1499 | -0.5      | 15.8   | 1       | 100.00 | 13.5 | even                | ok     | M+H    |

HRMS (ESI) of compound **5ax**.

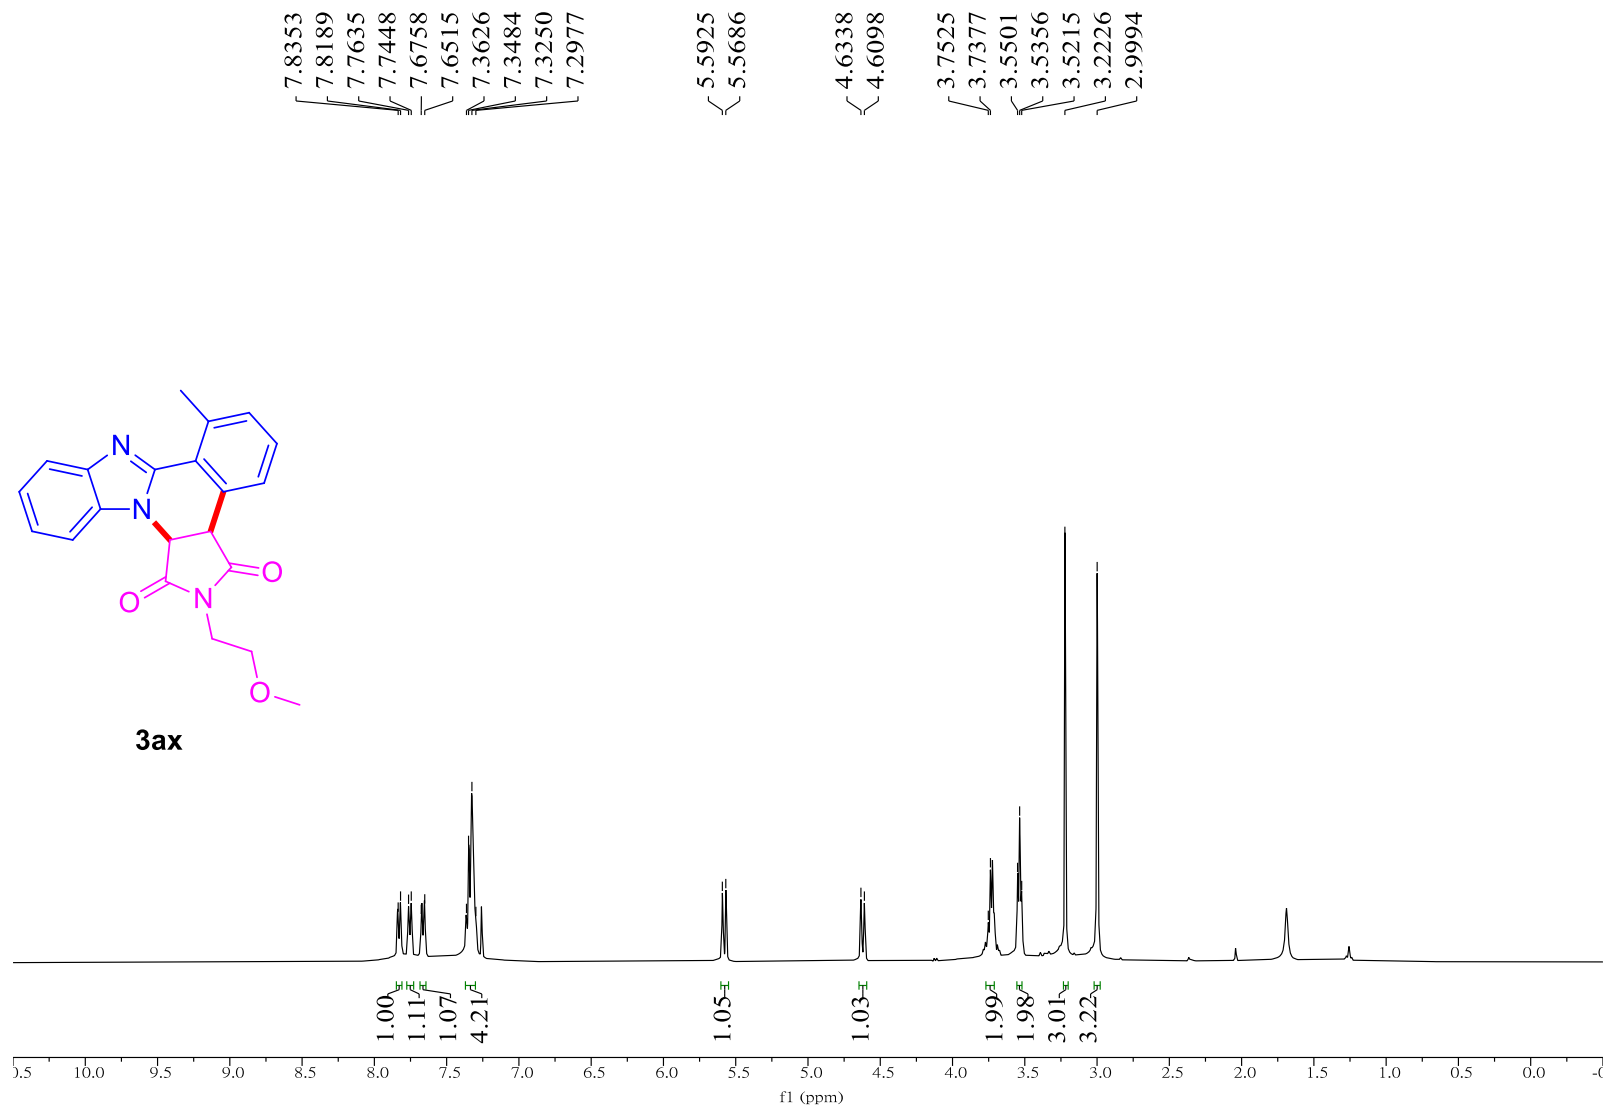

$^1\text{H}$  NMR spectrum (400 MHz) of compound **3ax** in  $\text{CDCl}_3$ .

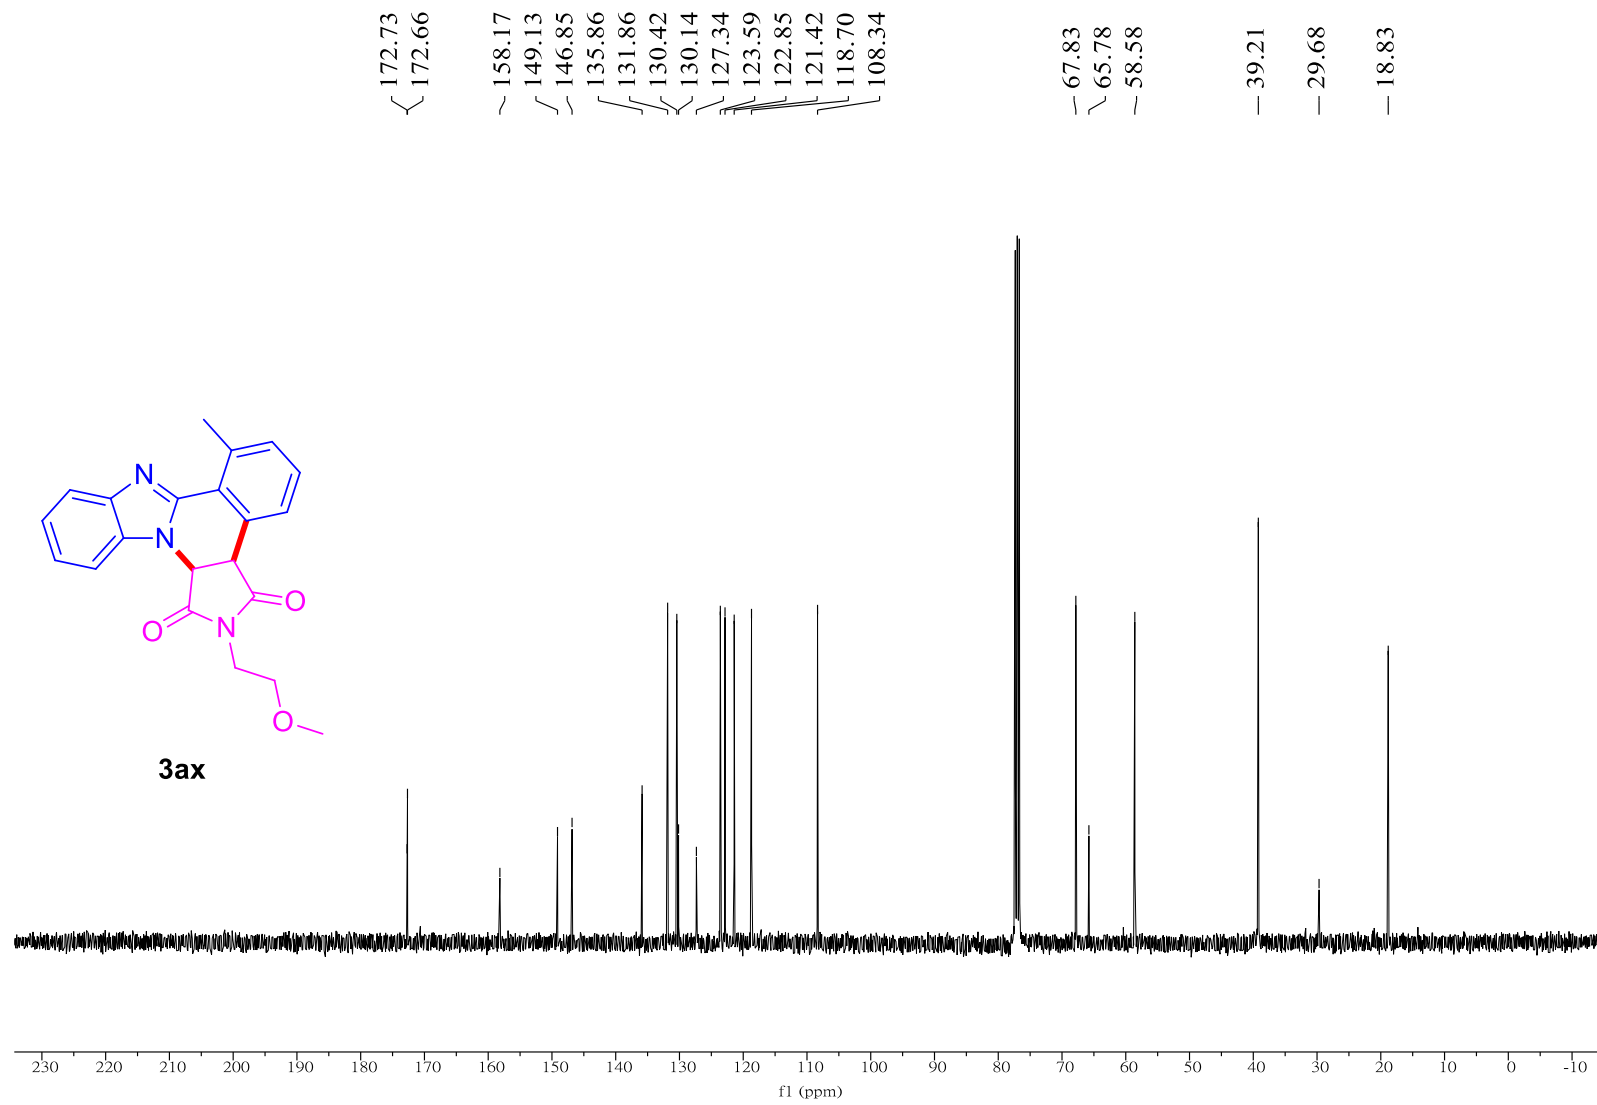

<sup>13</sup>C NMR spectrum (100 MHz) of compound **3ax** in CDCl<sub>3</sub>.

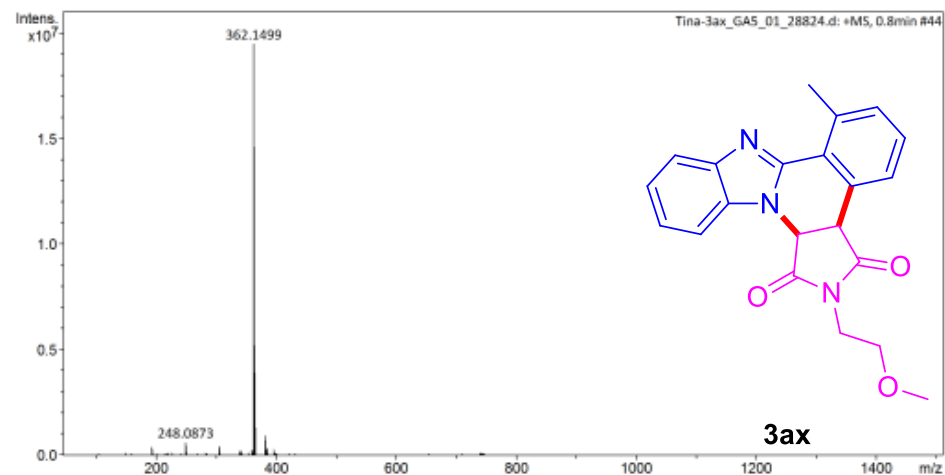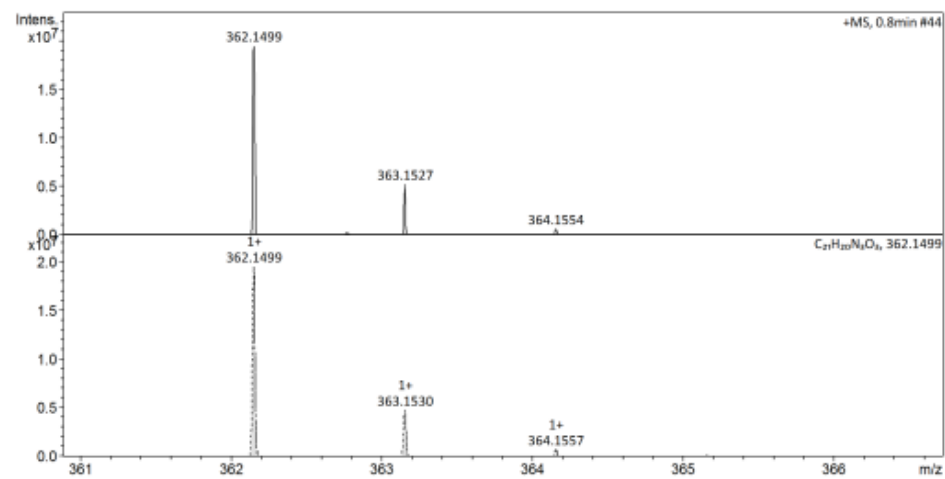

### Display Report

| Meas. m/z | # | Ion Formula                                                   | m/z      | err [ppm] | mSigma | # Sigma | Score  | rdb  | e <sup>-</sup> Conf | N-Rule | Adduct |
|-----------|---|---------------------------------------------------------------|----------|-----------|--------|---------|--------|------|---------------------|--------|--------|
| 362.1499  | 1 | C <sub>21</sub> H <sub>20</sub> N <sub>2</sub> O <sub>3</sub> | 362.1499 | 0.1       | 12.8   | 1       | 100.00 | 13.5 | even                | ok     | M+H    |

HRMS (ESI) of compound **3ax**.

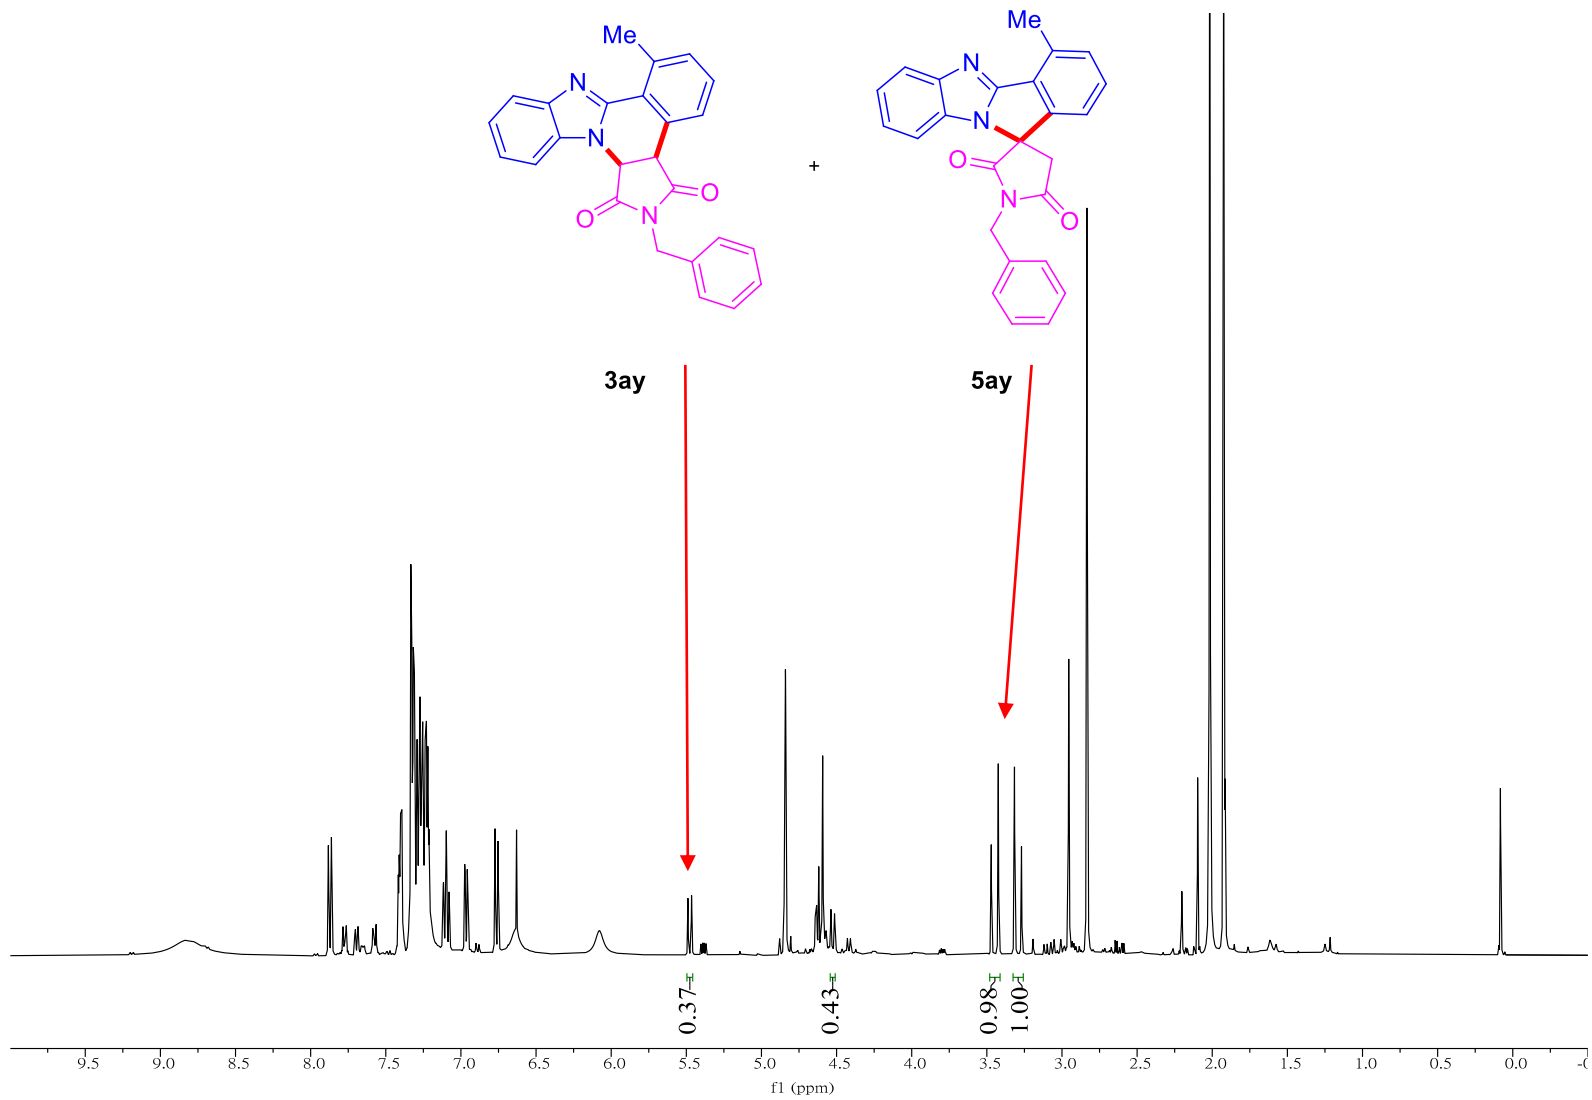

$^1\text{H}$  NMR spectrum (400 MHz) of compound **3ay** and **5ay** in  $\text{CDCl}_3$ .

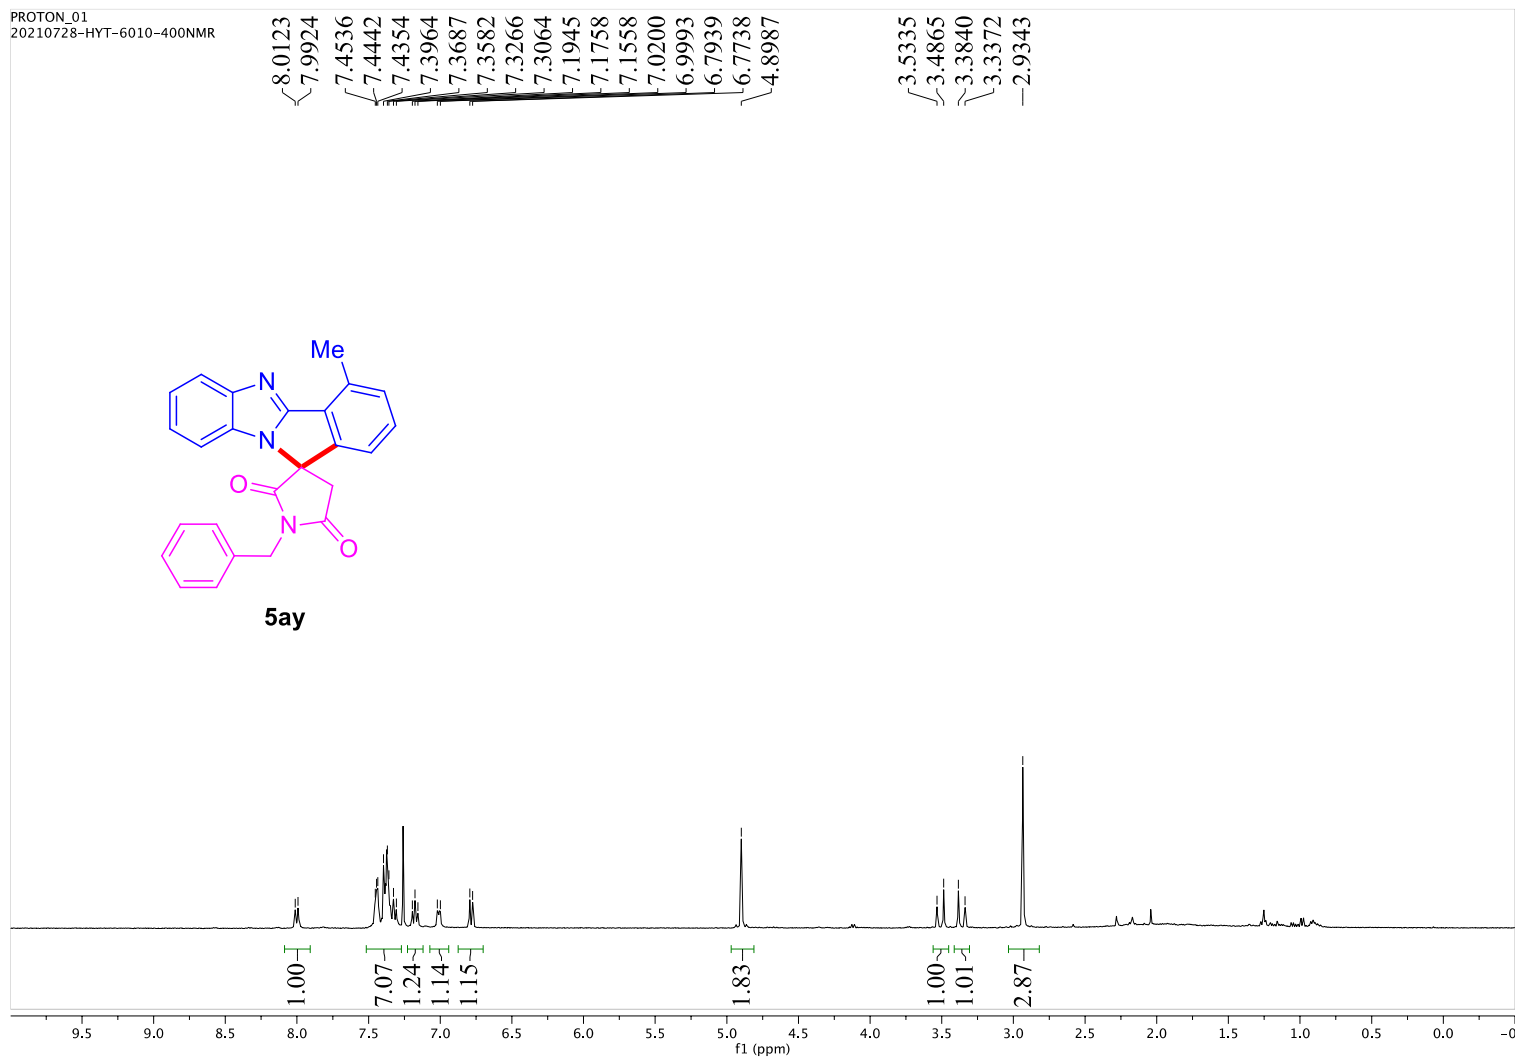

$^1\text{H}$  NMR spectrum (400 MHz) of compound **5ay** in  $\text{CDCl}_3$ .

CARBON\_01  
20210728-HYT-6010-400N

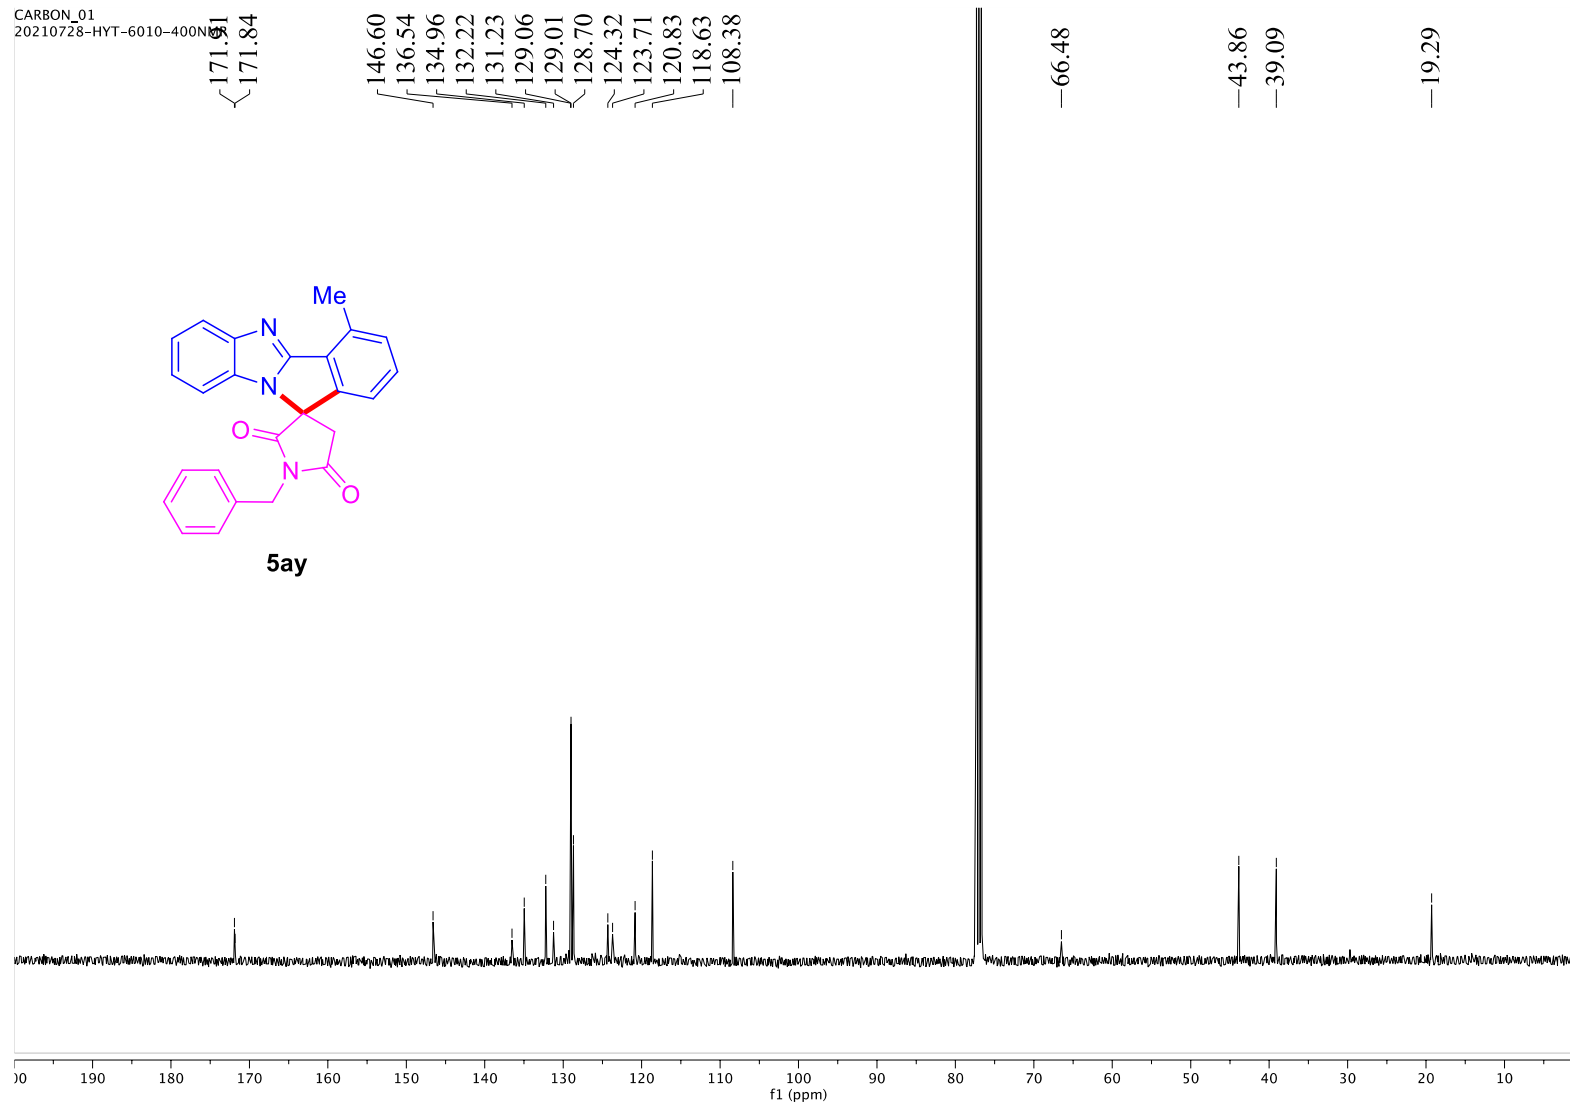

$^{13}\text{C}$  NMR spectrum (100 MHz) of compound **5ay** in  $\text{CDCl}_3$ .

288



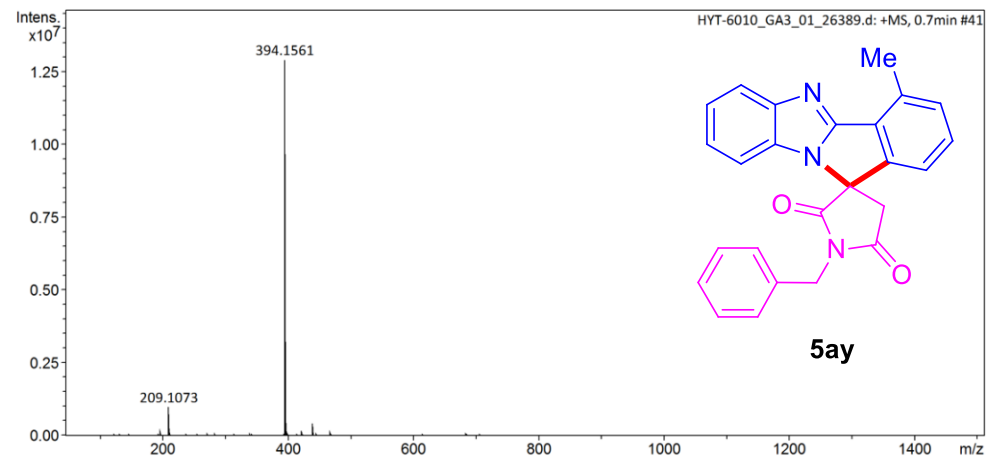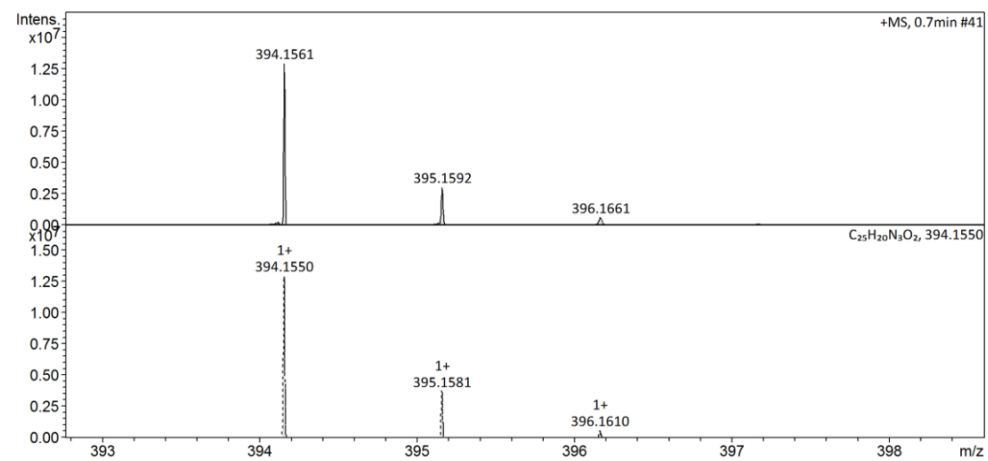

## Display Report

| Meas. $m/z$ | # | Ion Formula          | $m/z$    | err [ppm] | mSigma | # Sigma | Score  | rdb  | $e^-$ Conf | N-Rule | Adduct |
|-------------|---|----------------------|----------|-----------|--------|---------|--------|------|------------|--------|--------|
| 394.1561    | 1 | $C_{25}H_{20}N_4O_2$ | 394.1550 | 2.8       | 25.6   | 1       | 100.00 | 17.5 | even       | ok     | M      |

HRMS (ESI) of compound **5ay**.

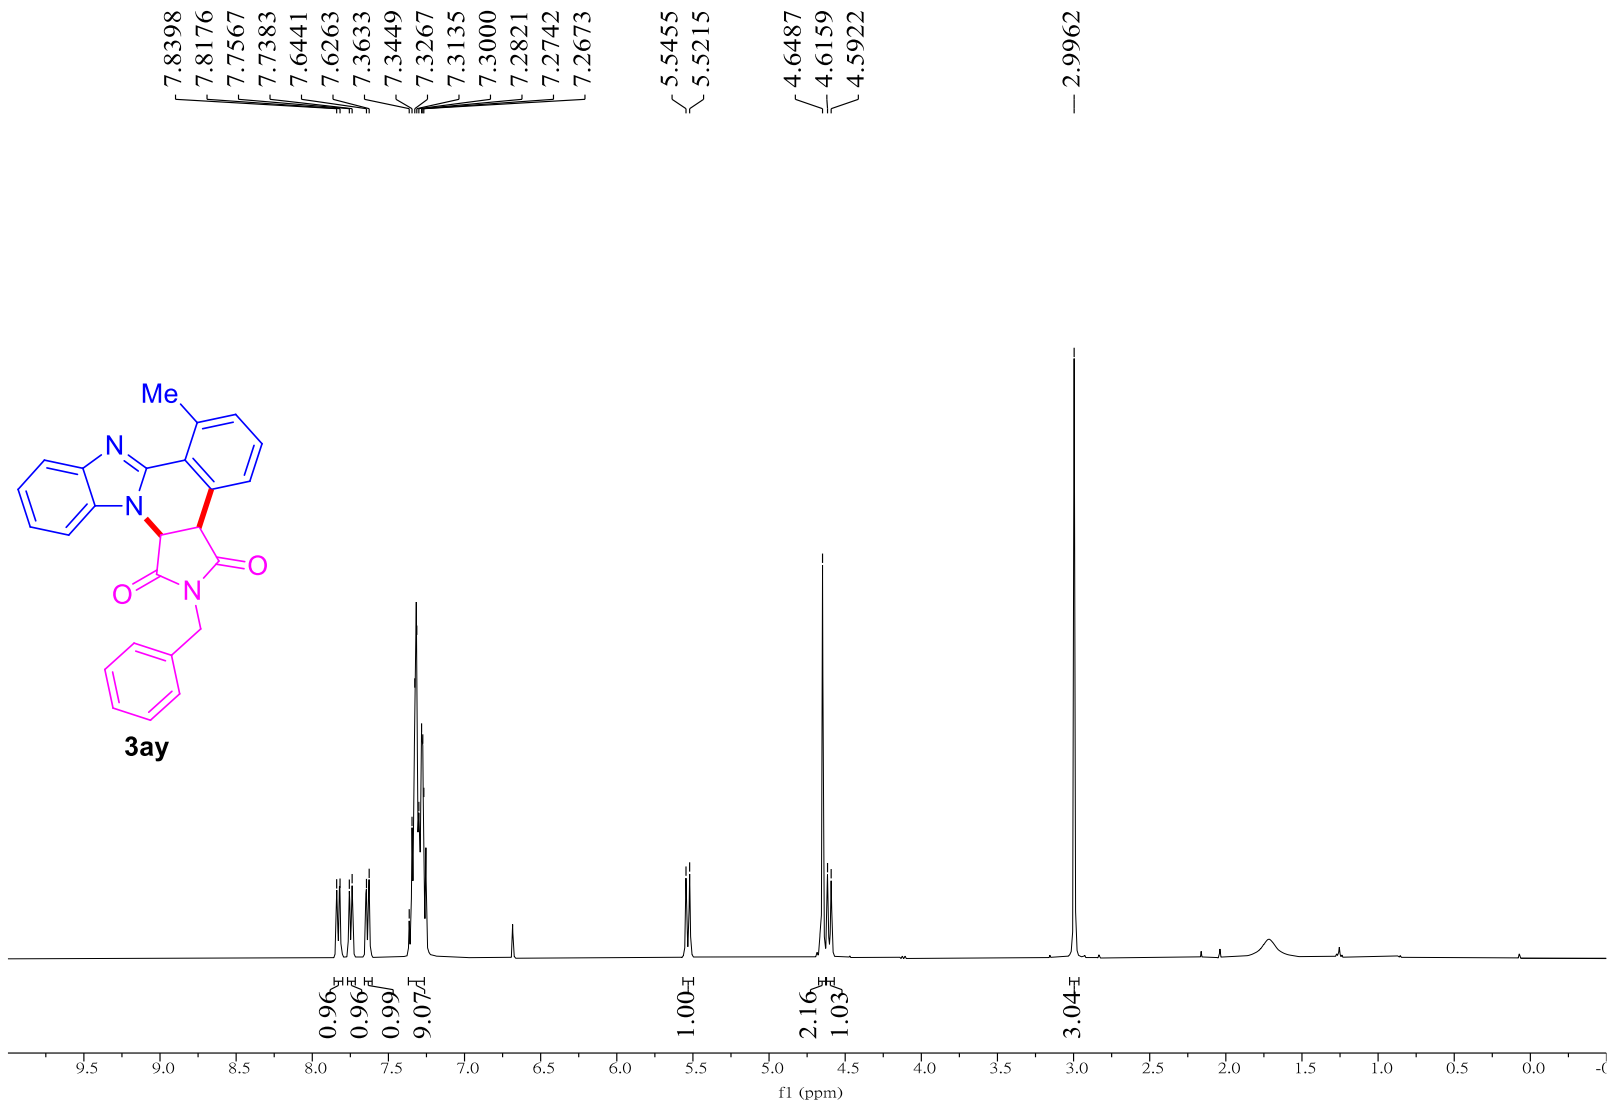

**<sup>1</sup>H NMR spectrum (400 MHz) of compound **3ay** in CDCl<sub>3</sub>.**

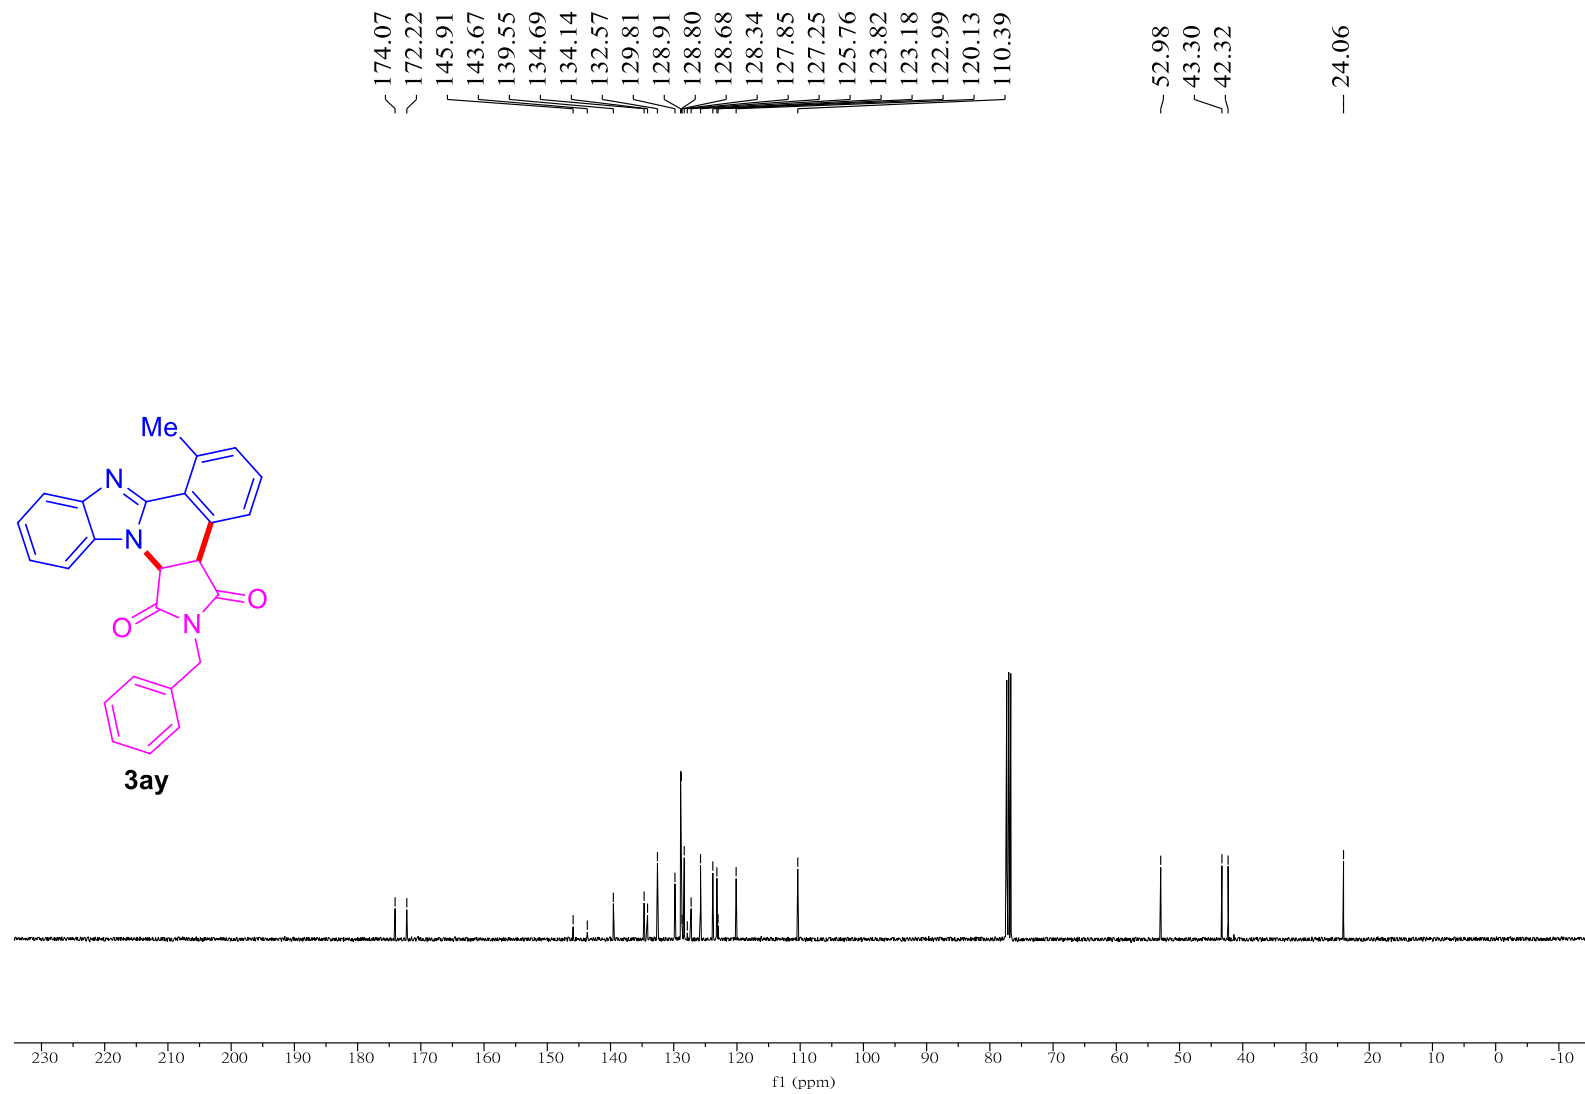

$^{13}\text{C}$  NMR spectrum (100 MHz) of compound **3ay** in  $\text{CDCl}_3$ .

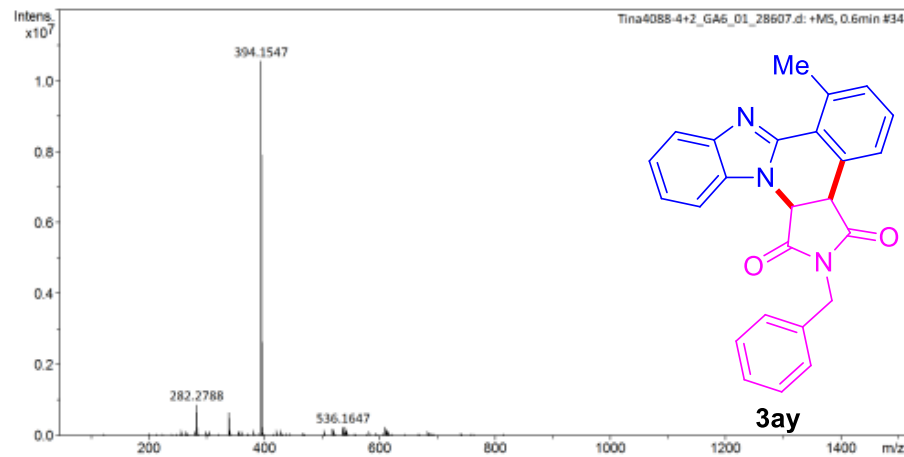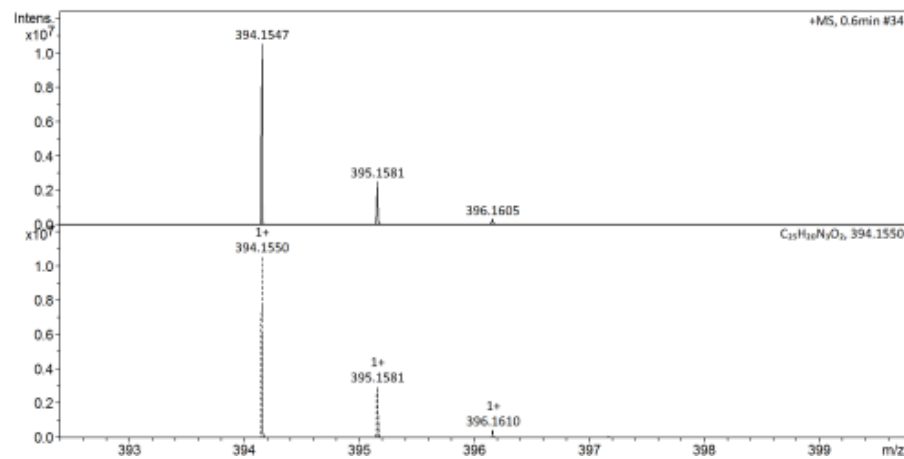

### Display Report

| Meas. m/z | # | Ion Formula                                                   | m/z      | err [ppm] | mSigma | # Sigma | Score  | rdb  | e <sup>-</sup> Conf | N-Rule | Adduct |
|-----------|---|---------------------------------------------------------------|----------|-----------|--------|---------|--------|------|---------------------|--------|--------|
| 394.1547  | 1 | C <sub>25</sub> H <sub>20</sub> N <sub>3</sub> O <sub>2</sub> | 394.1550 | 0.8       | 24.2   | 1       | 100.00 | 17.5 | even                | ok     | M+H    |

HRMS (ESI) of compound **3ay**.

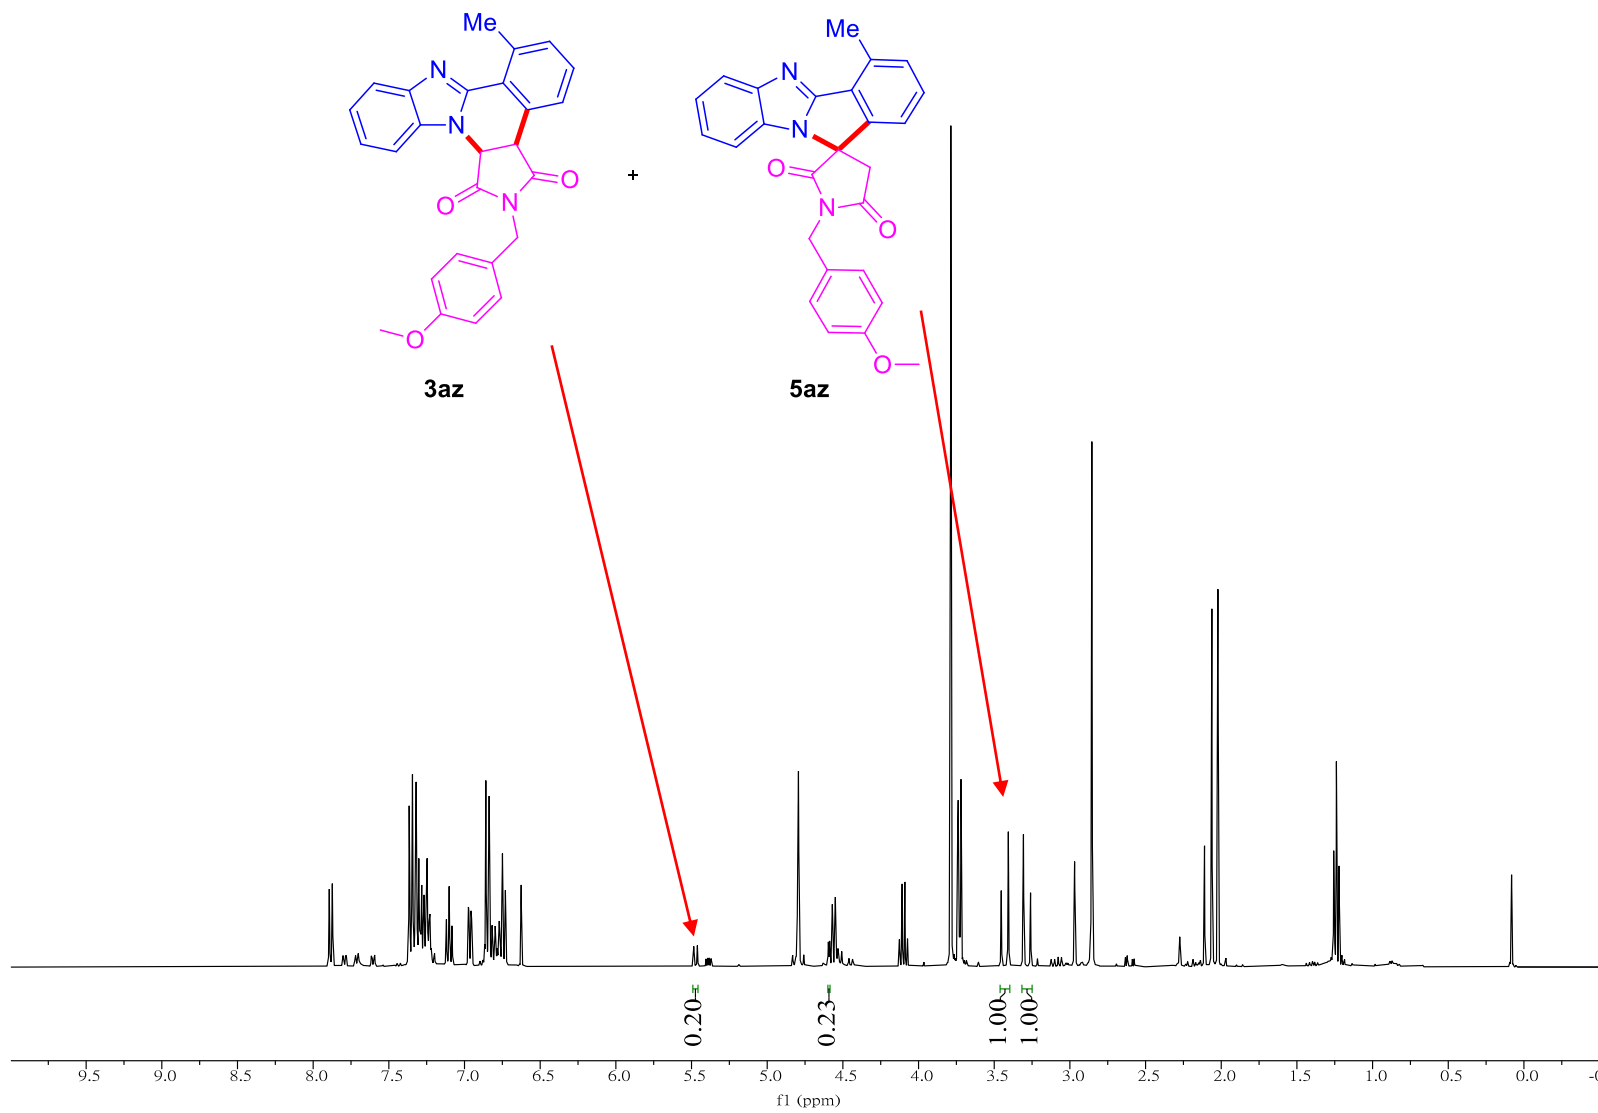

$^1\text{H}$  NMR spectrum (400 MHz) of compound **3az** and **5az** in  $\text{CDCl}_3$ .

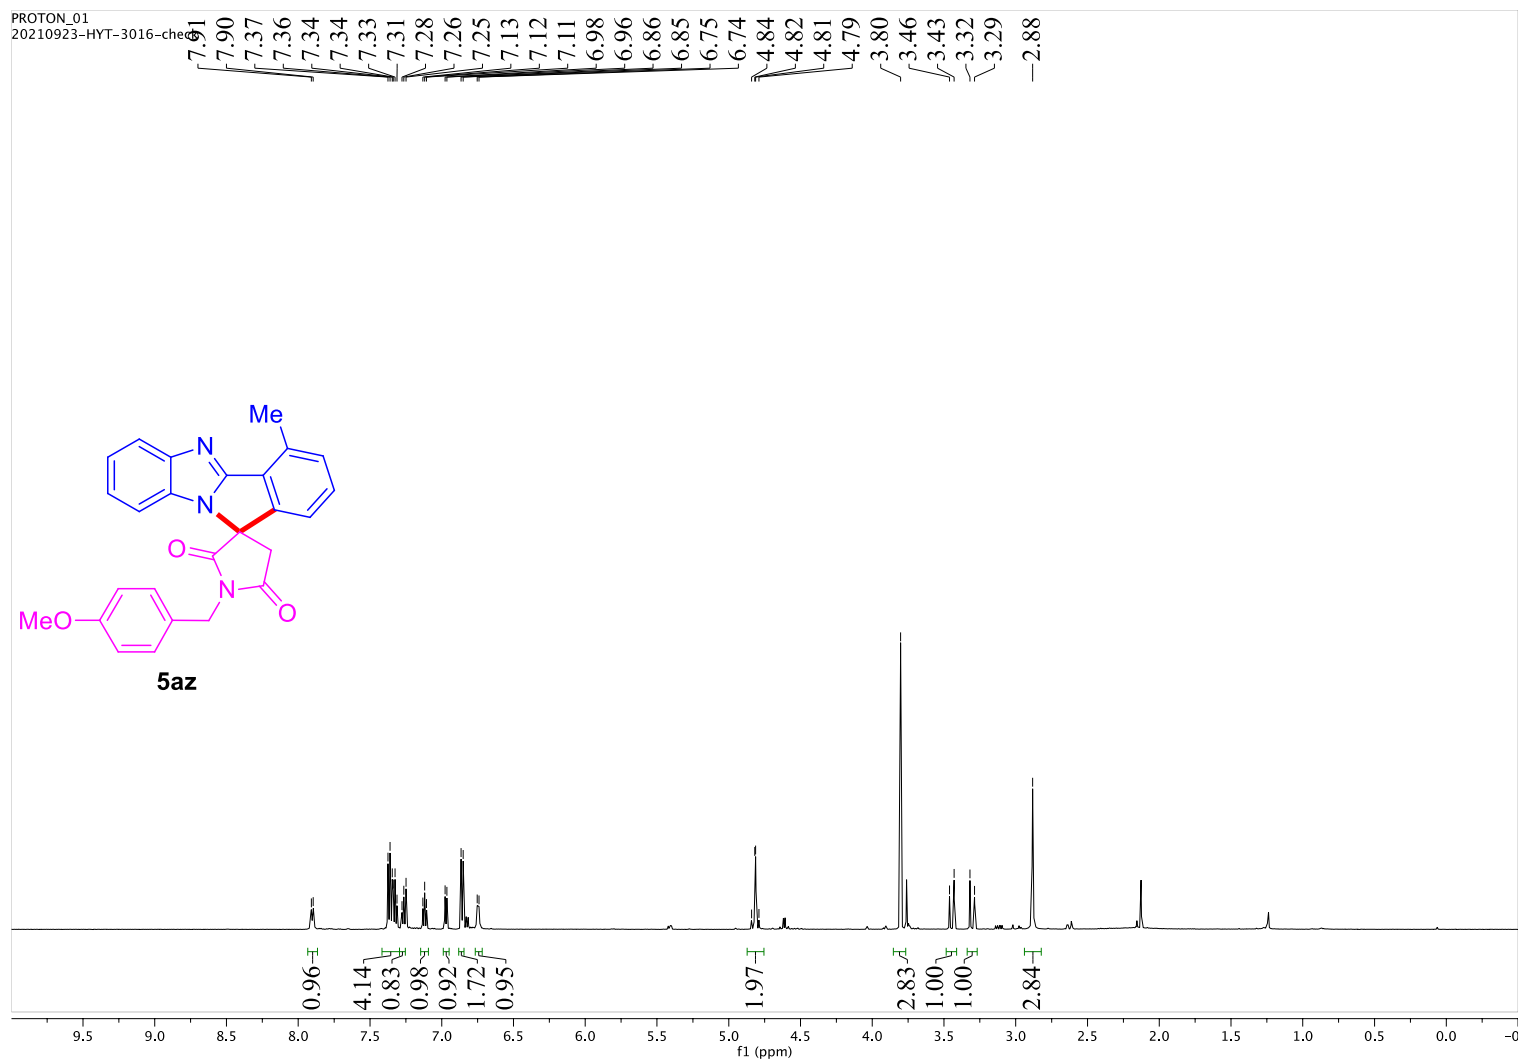

<sup>1</sup>H NMR spectrum (600 MHz) of compound **5az** in CDCl<sub>3</sub>.

CARBON\_01  
20220307-Tina-5az

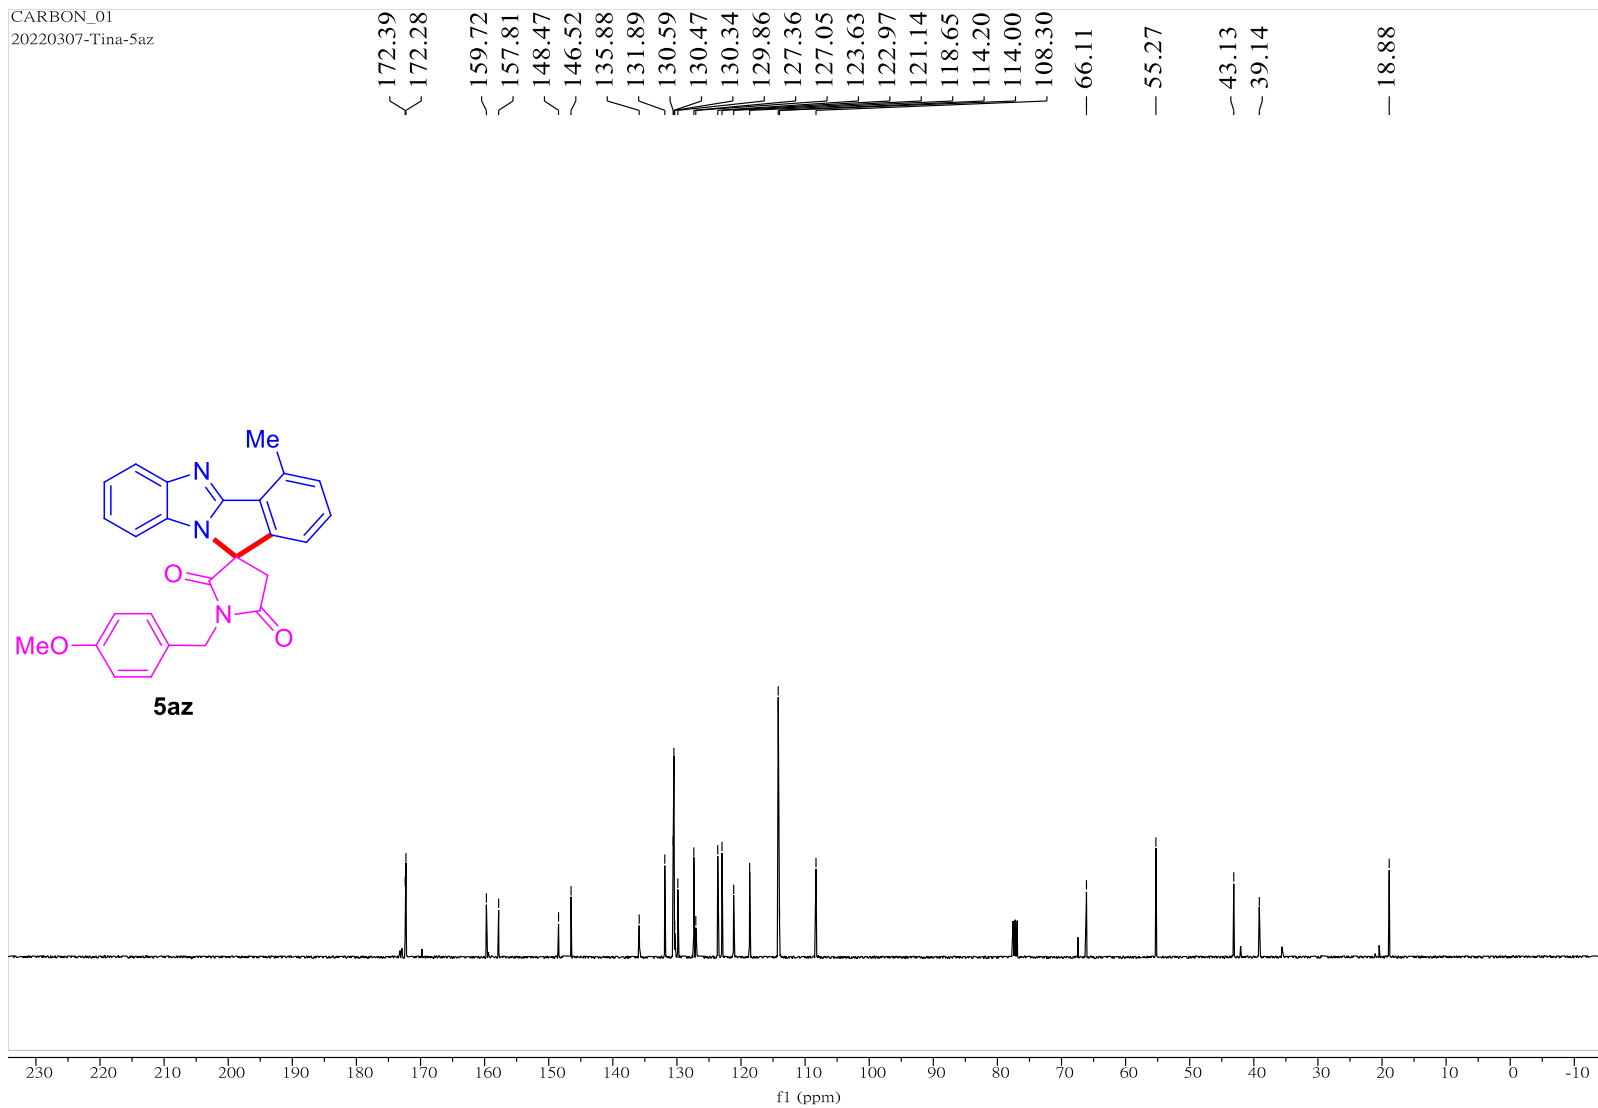

<sup>13</sup>C NMR spectrum (100 MHz) of compound **5az** in CDCl<sub>3</sub>.

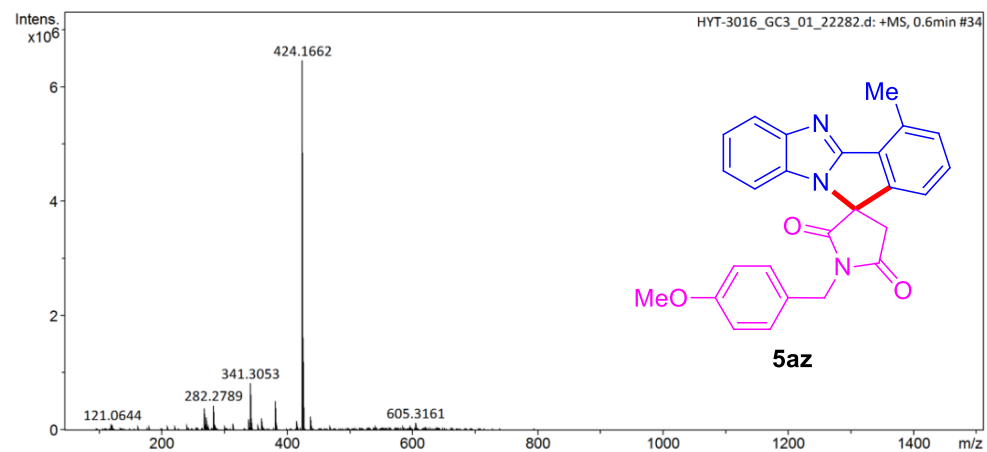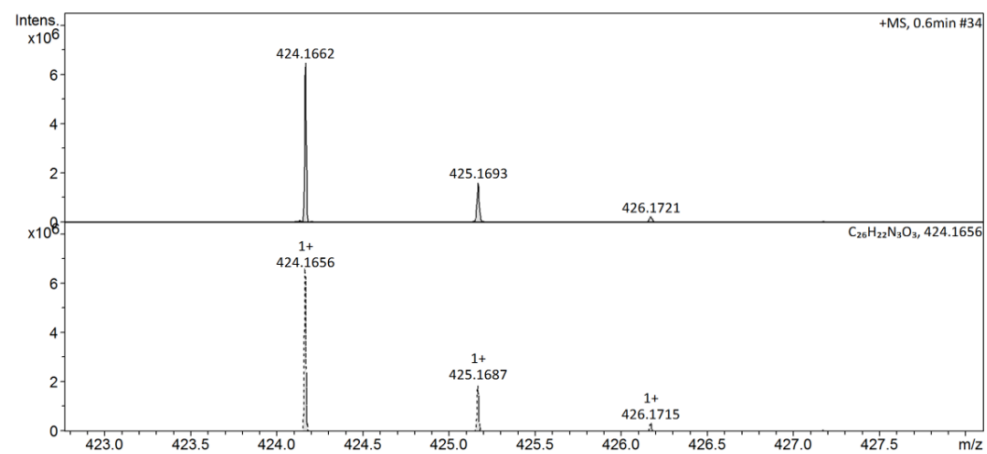

## Display Report

| Meas. m/z | # | Ion Formula                                                   | m/z      | err [ppm] | mSigma | # Sigma | Score  | rdb  | e <sup>-</sup> Conf | N-Rule | Adduct |
|-----------|---|---------------------------------------------------------------|----------|-----------|--------|---------|--------|------|---------------------|--------|--------|
| 424.1662  | 1 | C <sub>26</sub> H <sub>22</sub> N <sub>3</sub> O <sub>3</sub> | 424.1656 | 1.5       | 25.1   | 1       | 100.00 | 17.5 | even                | ok     | M+H    |

HRMS (ESI) of compound **5az**.



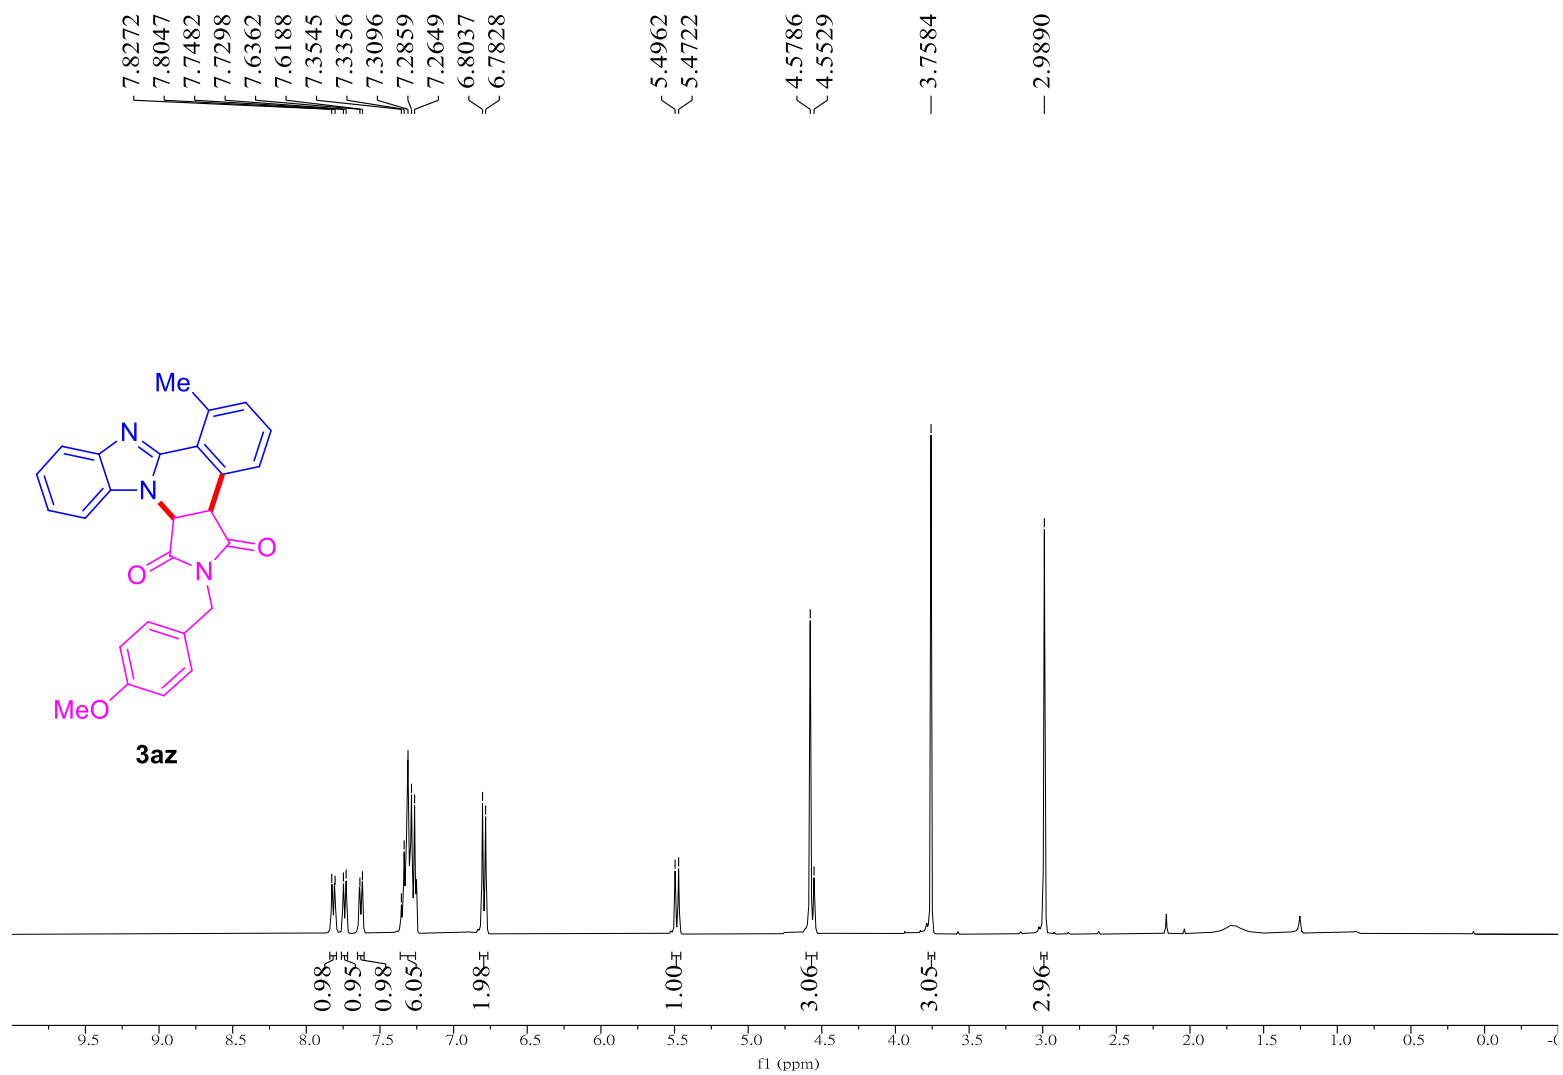

$^1\text{H}$  NMR spectrum (400 MHz) of compound **3az** in  $\text{CDCl}_3$ .

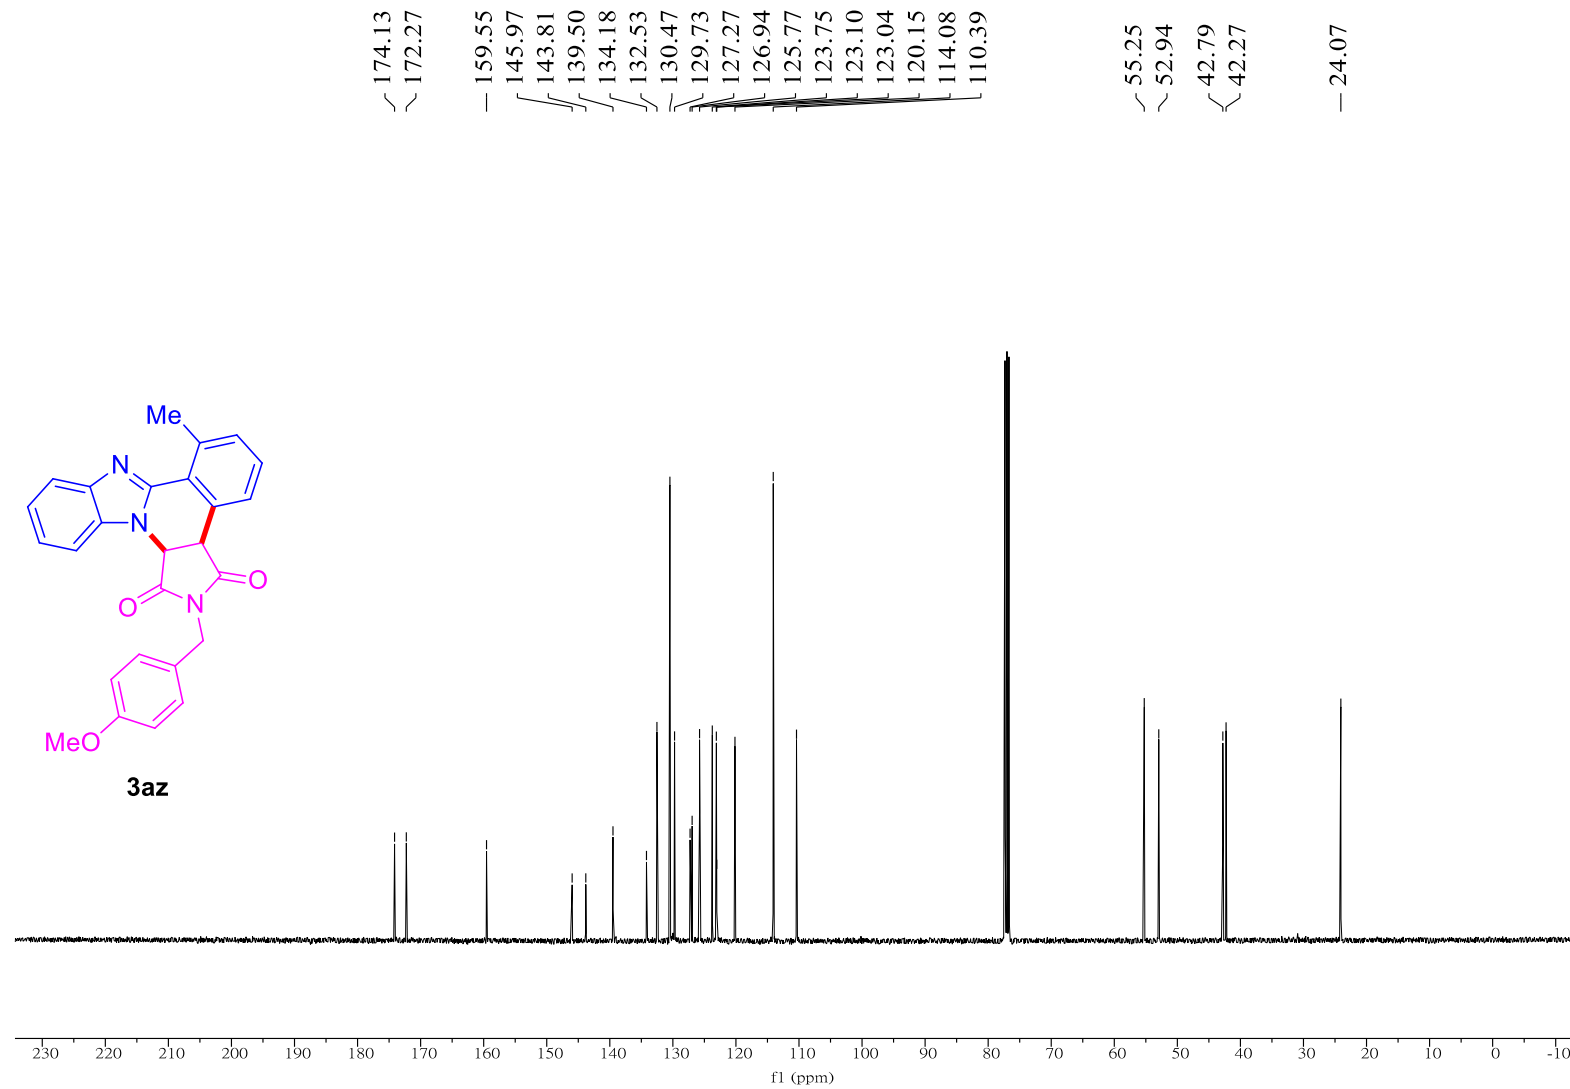

$^{13}\text{C}$  NMR spectrum (100 MHz) of compound **3az** in  $\text{CDCl}_3$ .

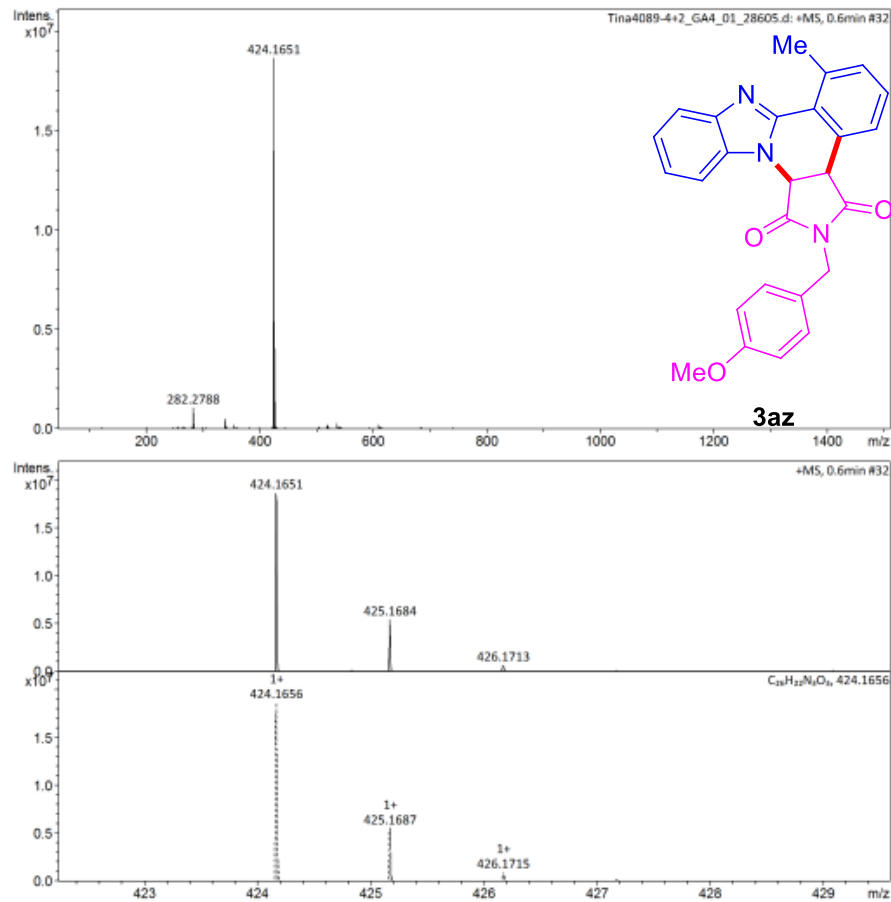

### Display Report

| Meas. m/z | # | Ion Formula                                                   | m/z      | err [ppm] | mSigma | # Sigma | Score  | rdB  | e <sup>-</sup> Conf | N-Rule | Adduct |
|-----------|---|---------------------------------------------------------------|----------|-----------|--------|---------|--------|------|---------------------|--------|--------|
| 424.1651  | 1 | C <sub>26</sub> H <sub>22</sub> N <sub>3</sub> O <sub>3</sub> | 424.1656 | 1.1       | 7.1    | 1       | 100.00 | 17.5 | even                | ok     | M+H    |

HRMS (ESI) of compound **3az**.

PROTON\_01  
20220616-Tina-5100-RM

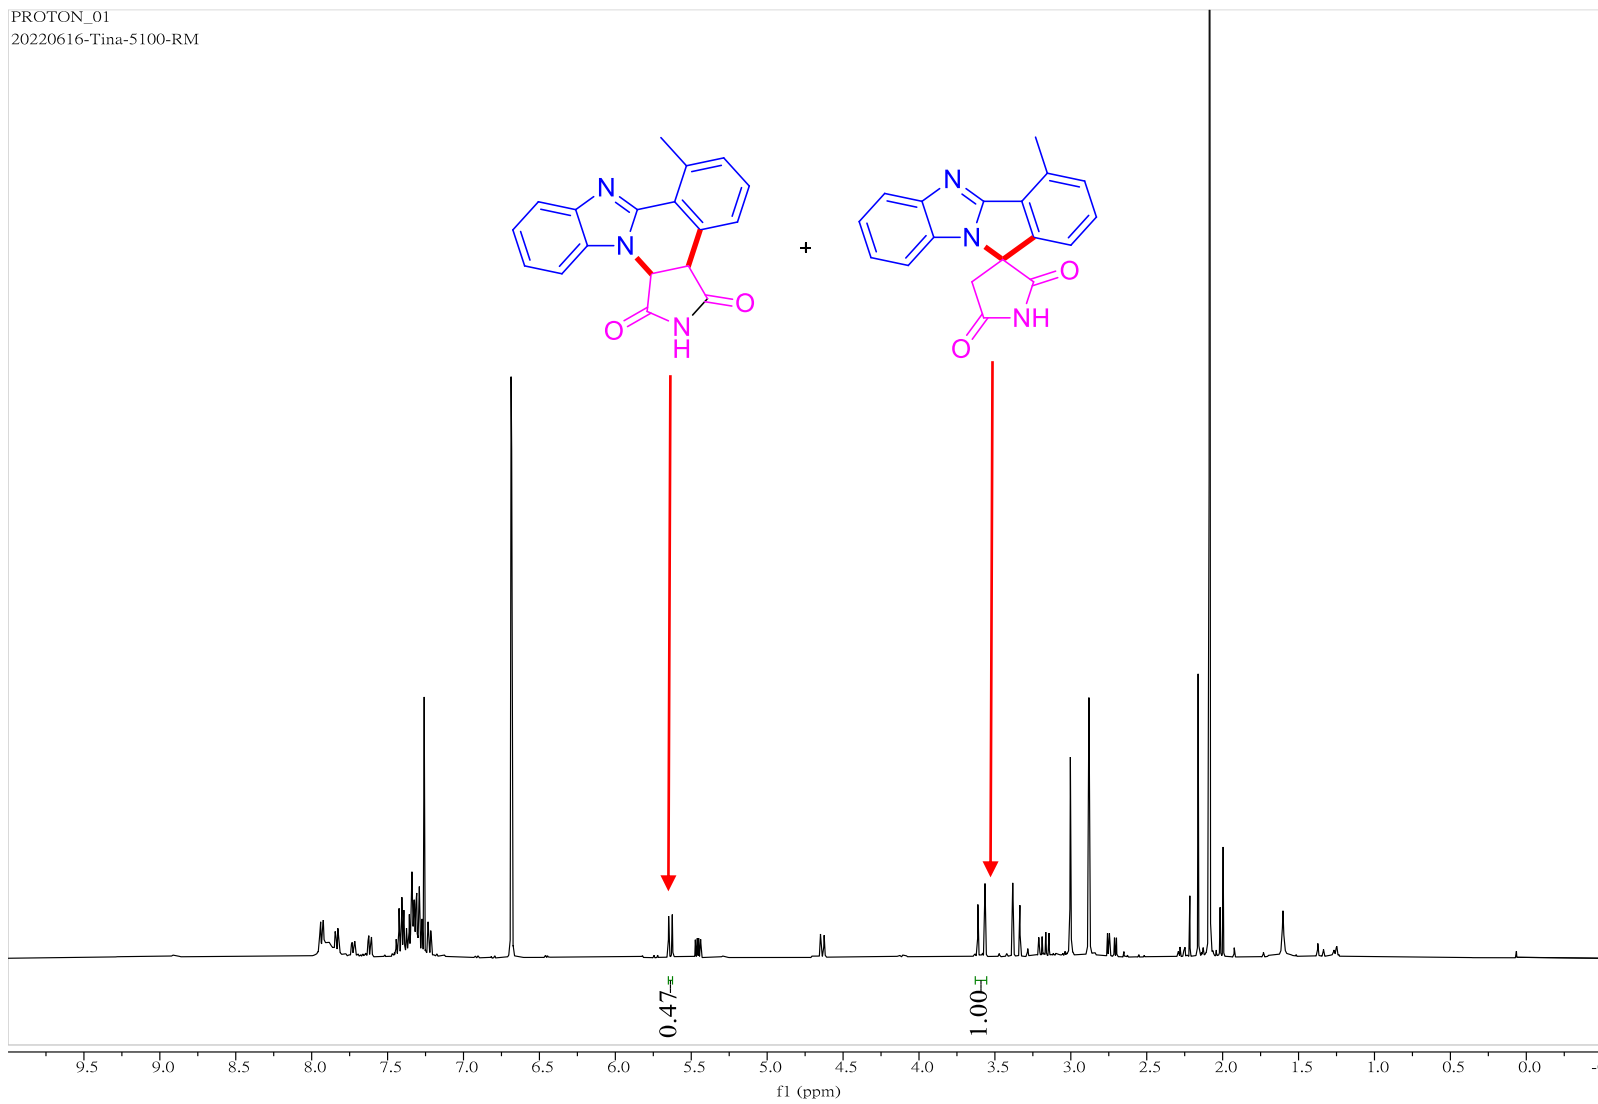

$^1\text{H}$  NMR spectrum (400 MHz) of compound **5bc** and **3bc** in  $\text{CDCl}_3$ .

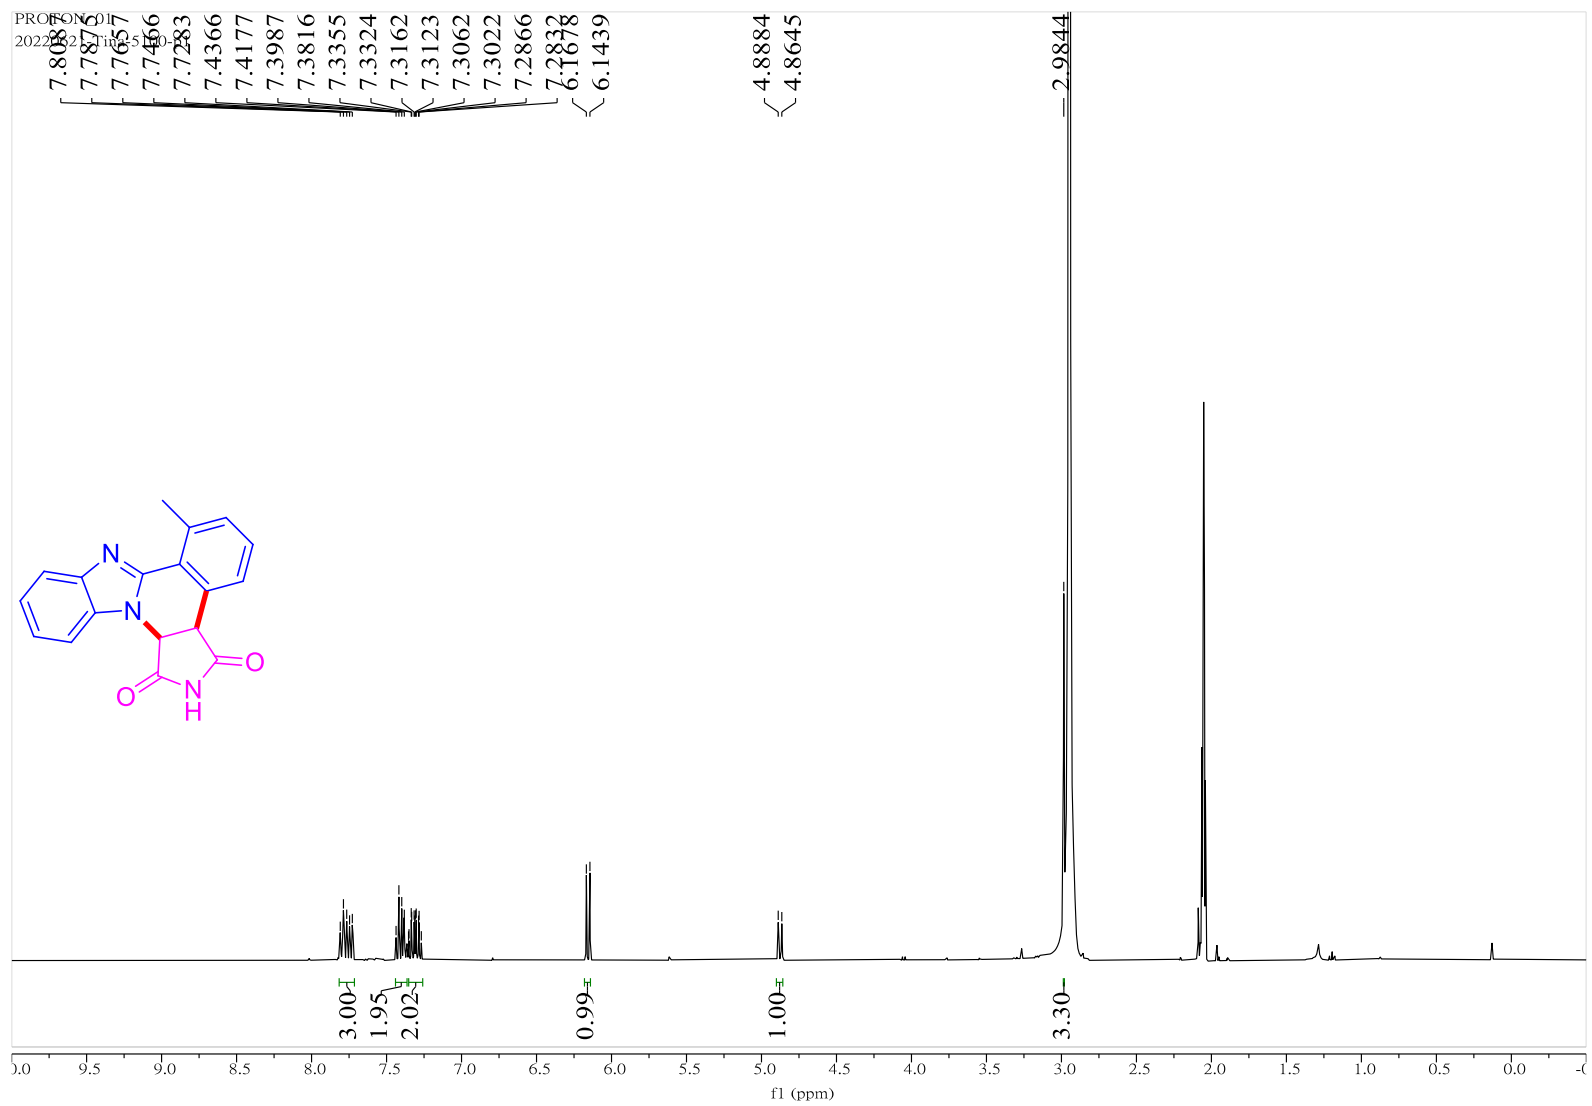

$^1\text{H}$  NMR spectrum (400 MHz) of compound **3bc** in acetone- $d_6$ .

CARBON\_01  
20220723-Tina-5100-4\_2-C

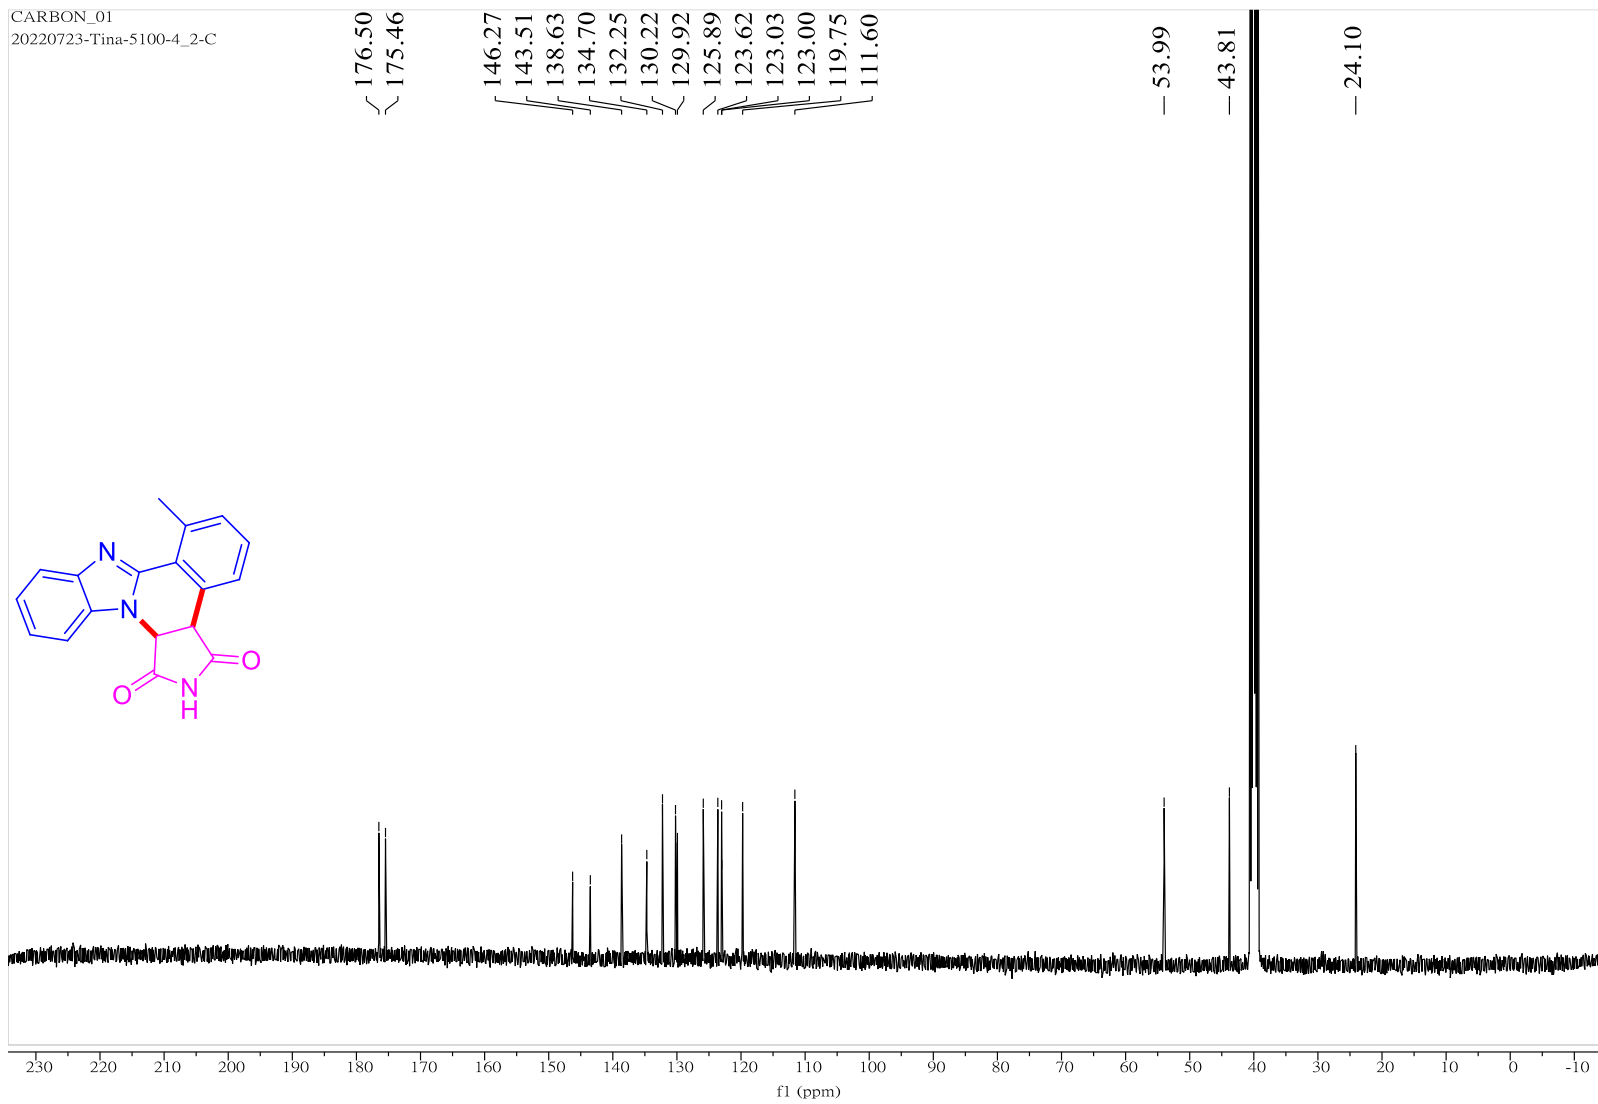

$^{13}\text{C}$  NMR spectrum (150 MHz) of compound **3bc** in  $\text{DMSO-}d_6$ .

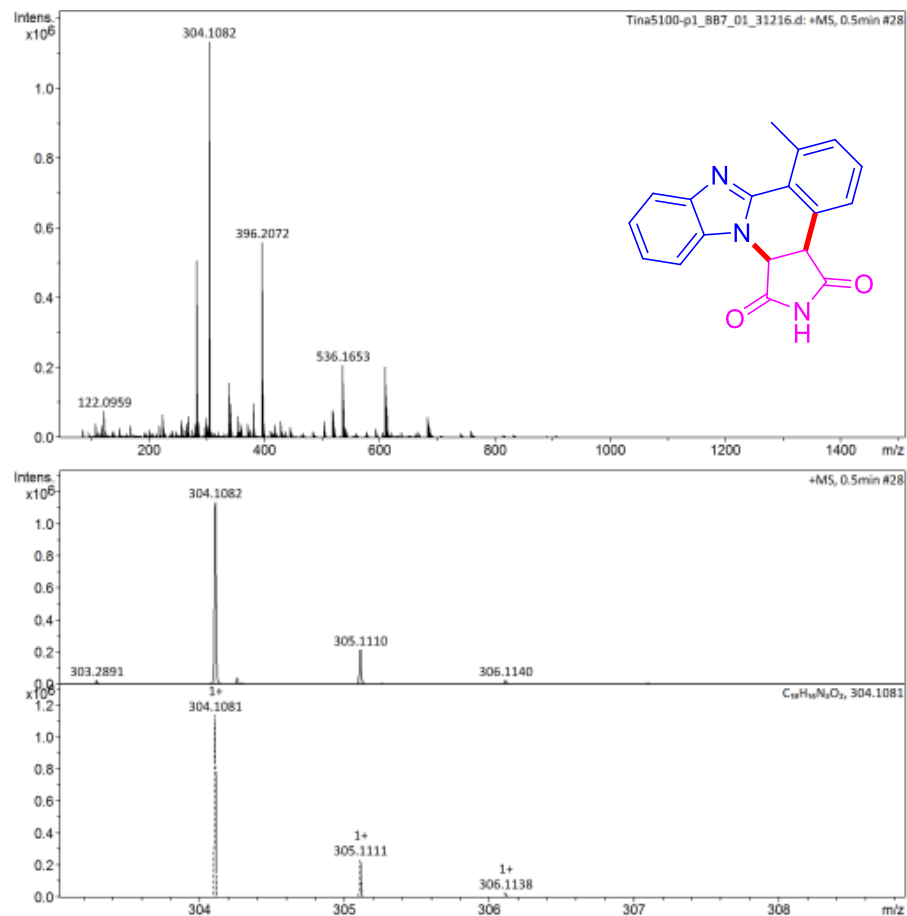

### Display Report

| Meas. m/z | # | Ion Formula                                                   | m/z      | err [ppm] | mSigma | # Sigma | Score  | rdb  | e <sup>-</sup> Conf | N-Rule | Adduct |
|-----------|---|---------------------------------------------------------------|----------|-----------|--------|---------|--------|------|---------------------|--------|--------|
| 304.1082  | 1 | C <sub>18</sub> H <sub>14</sub> N <sub>3</sub> O <sub>2</sub> | 304.1081 | -0.5      | 10.5   | 1       | 100.00 | 13.5 | even                | ok     | M+H    |

HRMS (ESI) of compound **3bc**

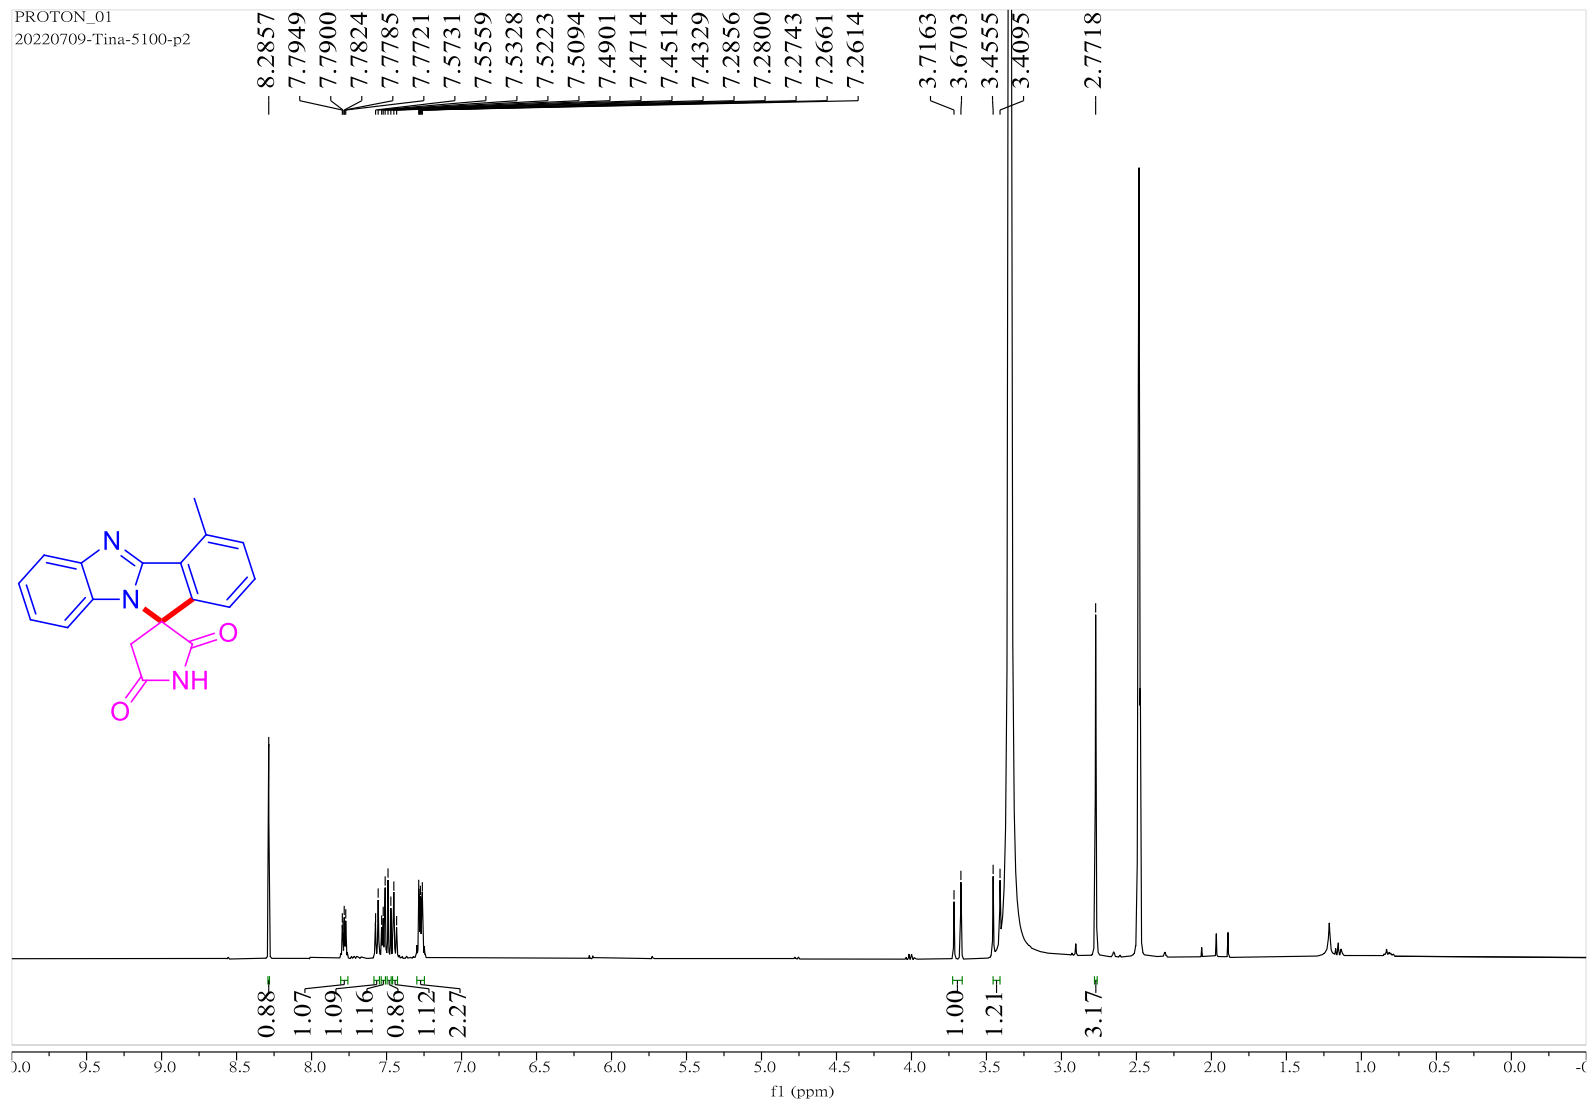

$^1\text{H}$  NMR spectrum (400 MHz) of compound **5bc** in  $\text{DMSO-}d_6$ .



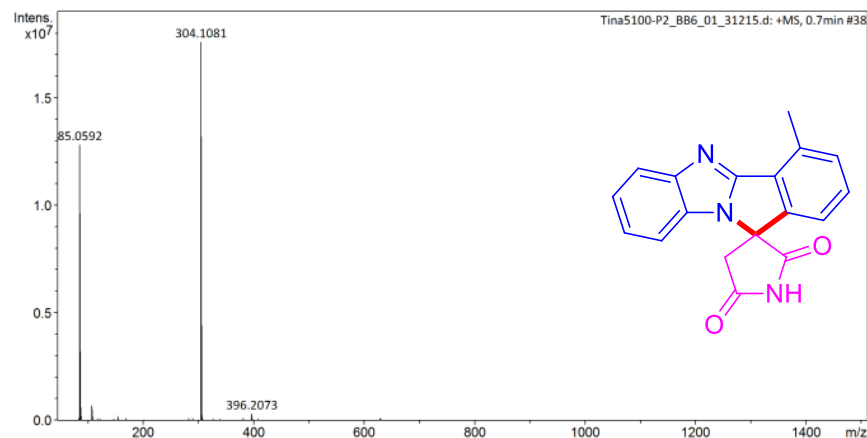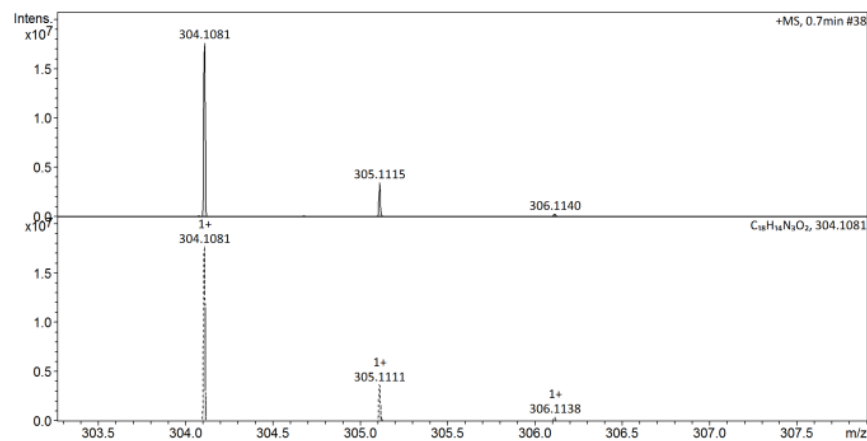

## Display Report

| Meas. m/z | # | Ion Formula                                                   | m/z      | err [ppm] | mSigma | # Sigma | Score  | rdb  | e <sup>-</sup> Conf | N-Rule | Adduct |
|-----------|---|---------------------------------------------------------------|----------|-----------|--------|---------|--------|------|---------------------|--------|--------|
| 304.1081  | 1 | C <sub>18</sub> H <sub>14</sub> N <sub>2</sub> O <sub>2</sub> | 304.1081 | 0.2       | 8.2    | 1       | 100.00 | 13.5 | even                | ok     | M+H    |

HRMS (ESI) of compound **5bc**

PROTON\_01  
20220720-Tina-6019-c

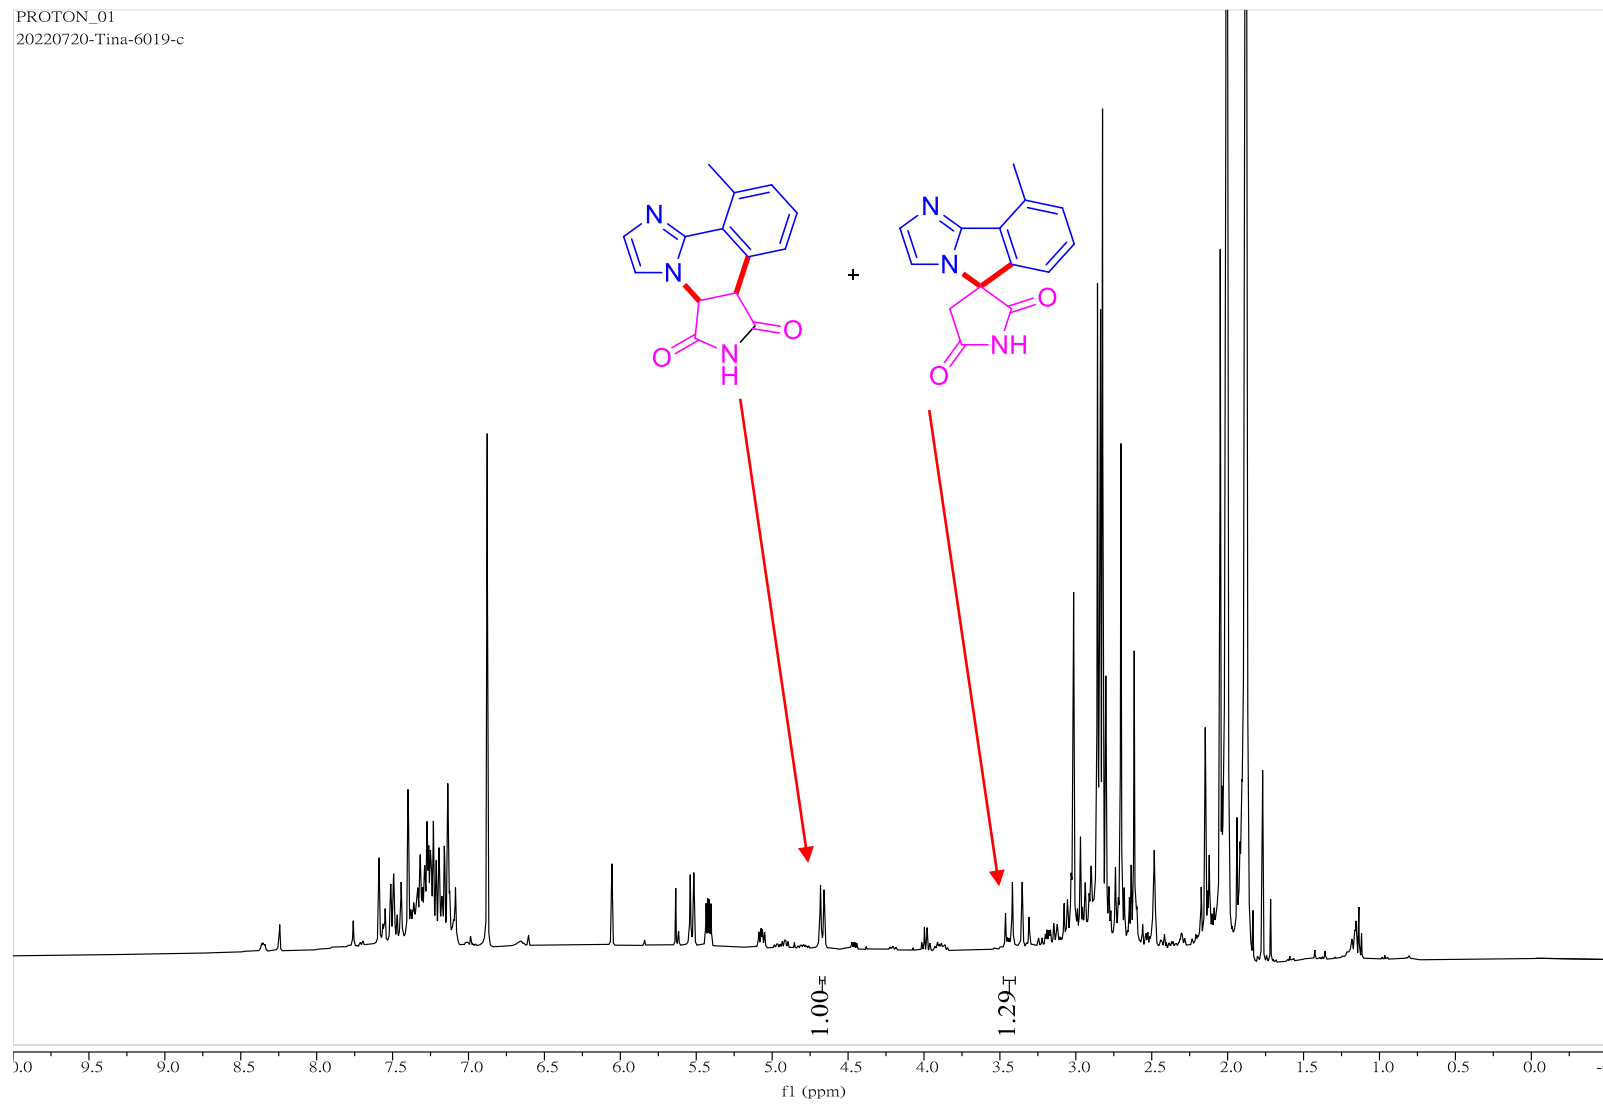

$^1\text{H}$  NMR spectrum (400 MHz) of compound **5bd** and **3bd** in  $\text{DMSO-}d_6$ .

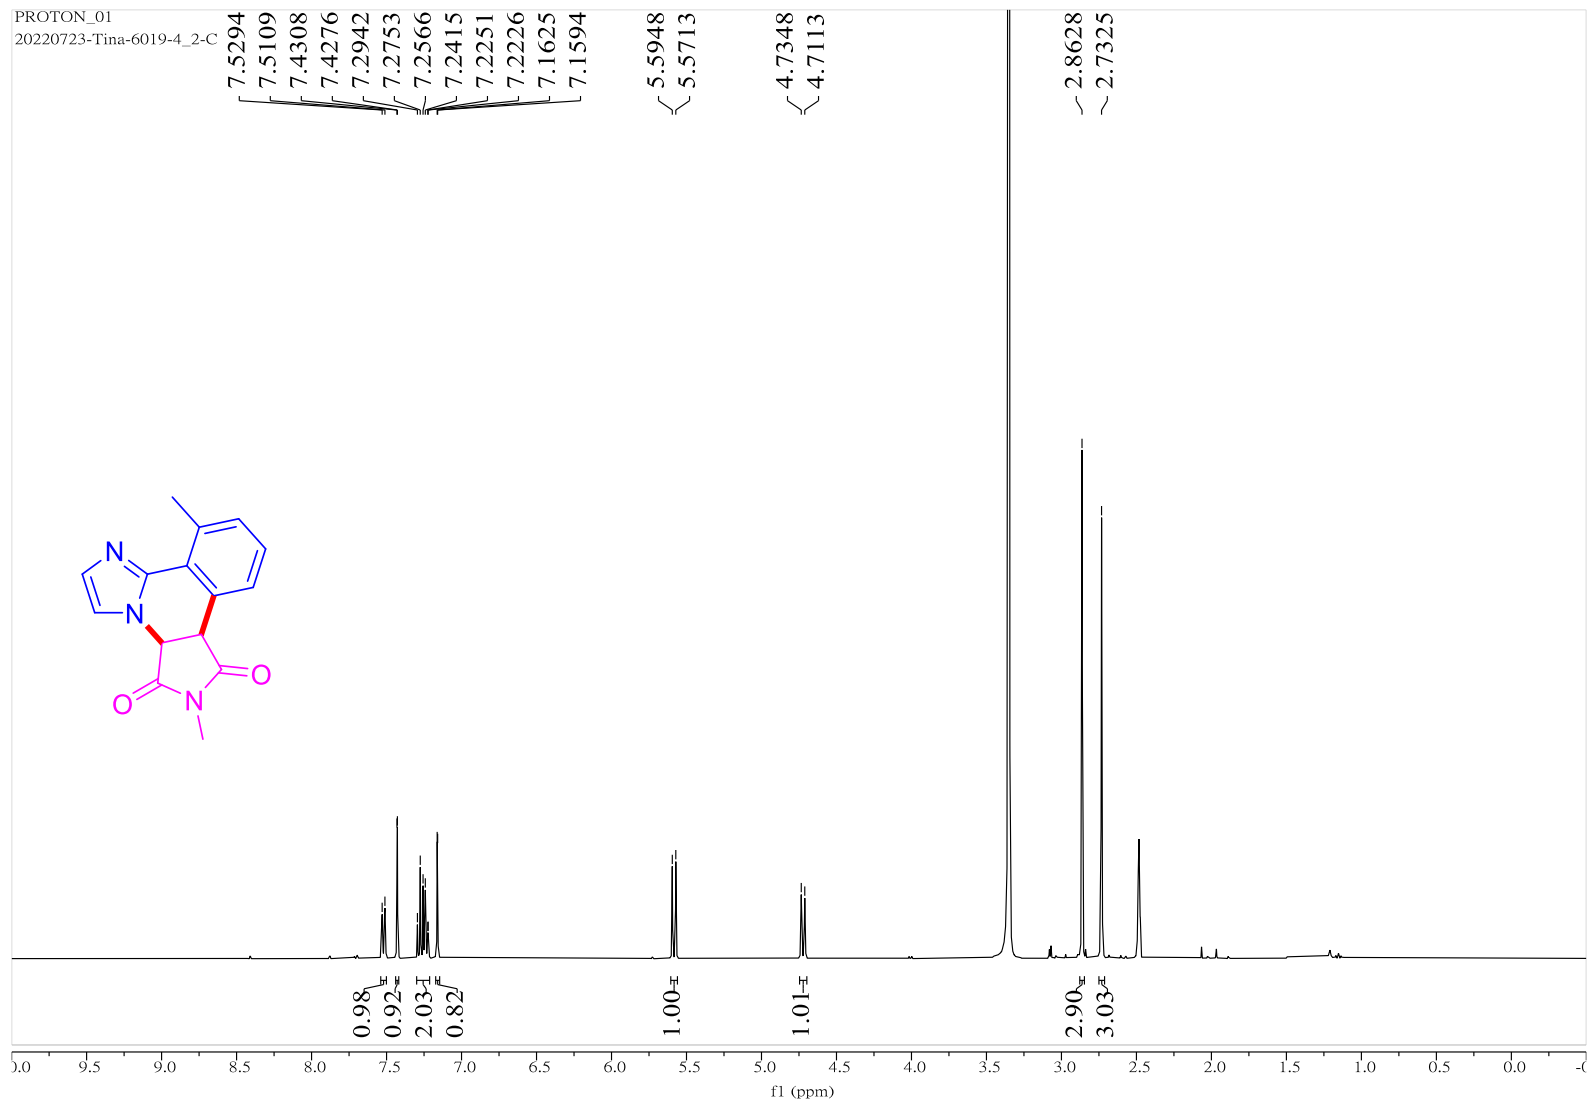

$^1\text{H}$  NMR spectrum (400 MHz) of compound **3bd** in  $\text{DMSO-}d_6$ .

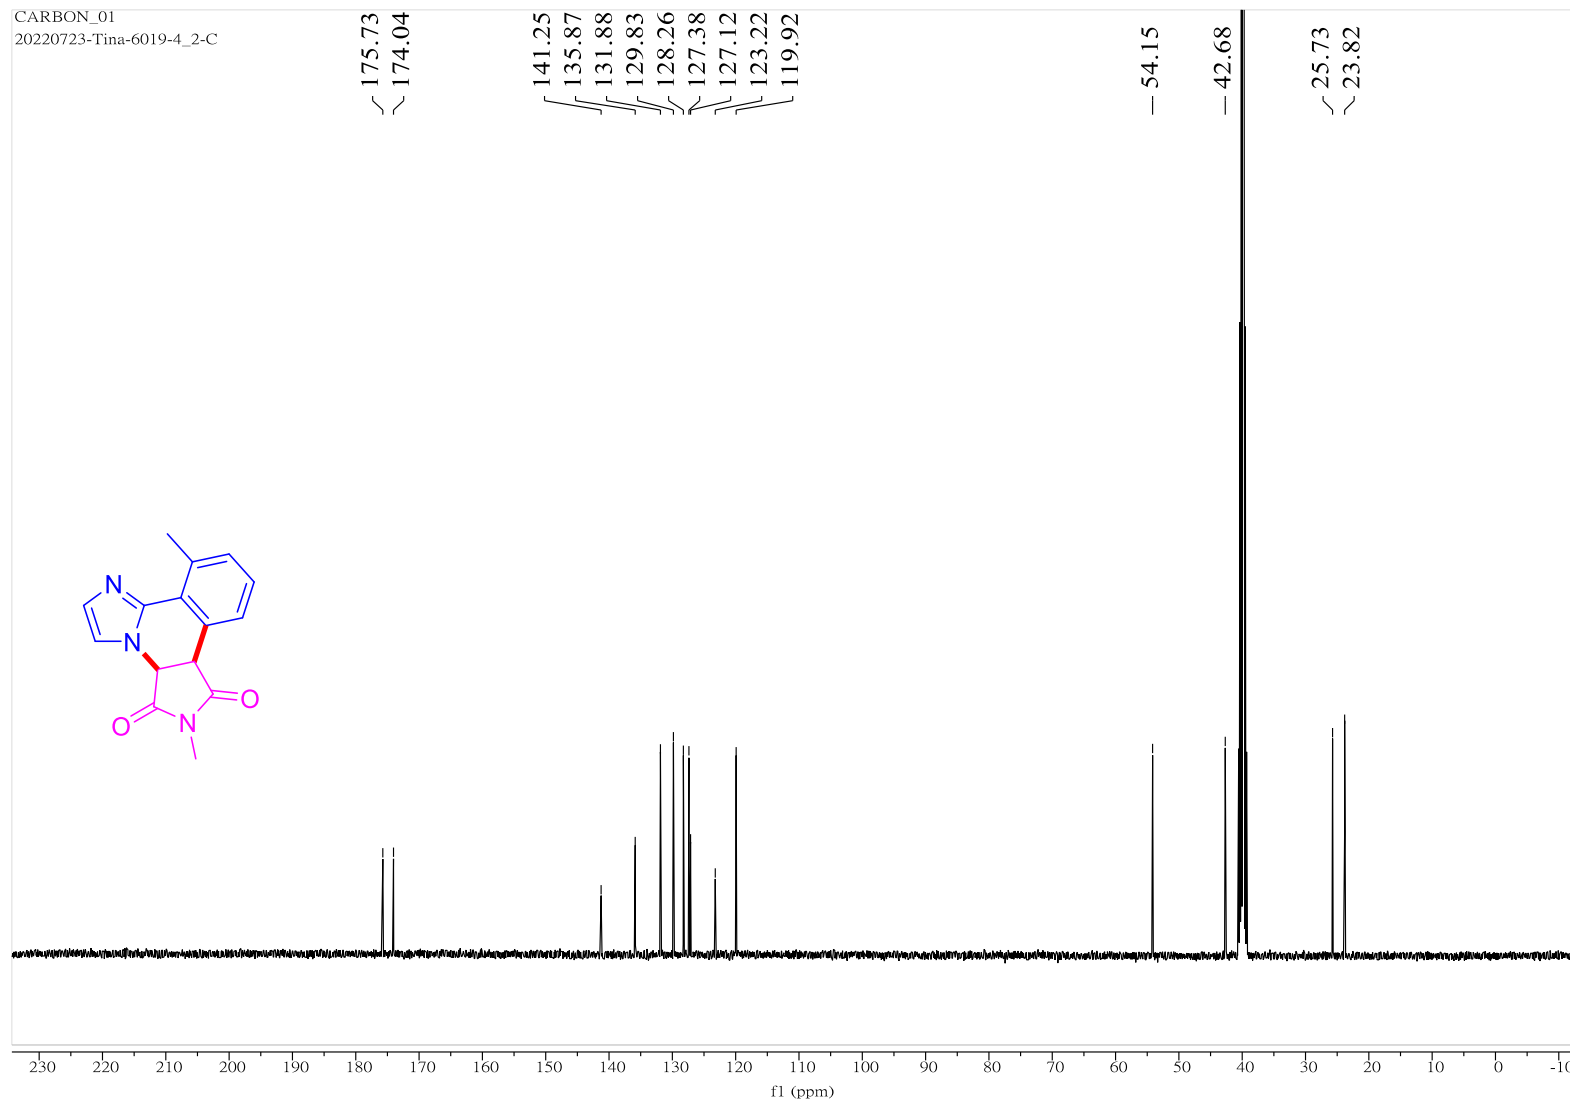

$^{13}\text{C}$  NMR spectrum (100 MHz) of compound **3bd** in  $\text{DMSO-}d_6$ .

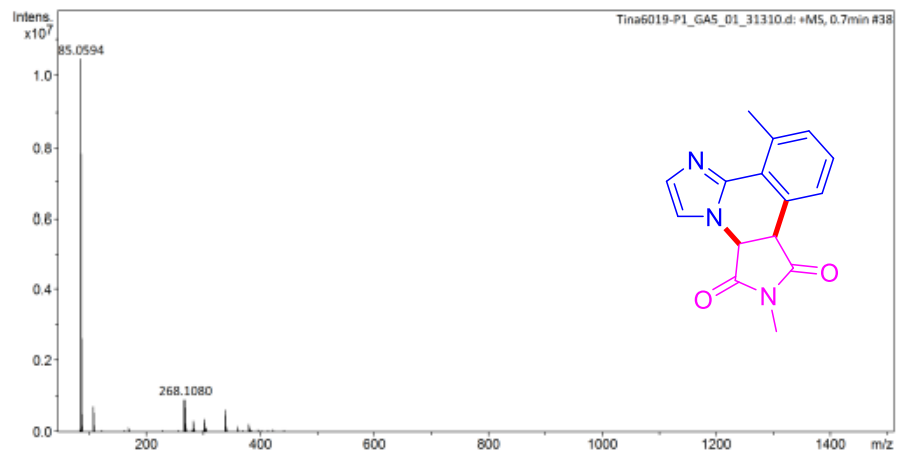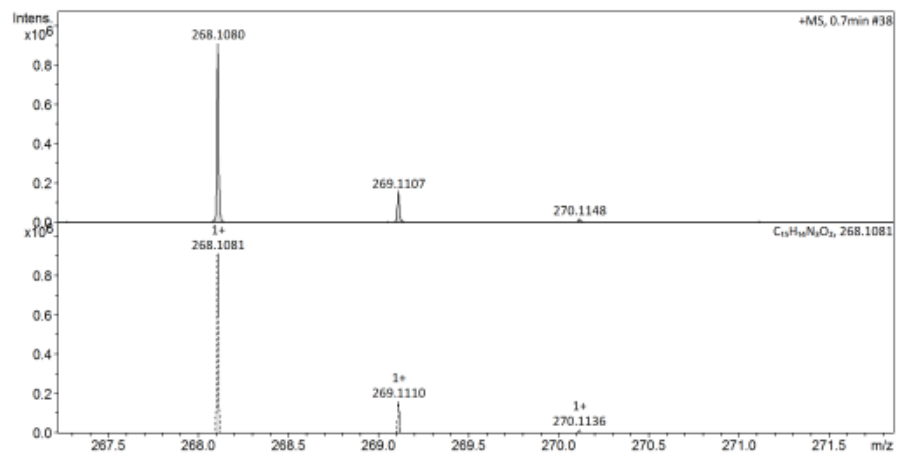

### Display Report

| Meas. m/z | # | Ion Formula                                                   | m/z      | err [ppm] | mSigma | # Sigma | Score  | rdb  | e <sup>-</sup> Conf | N-Rule | Adduct |
|-----------|---|---------------------------------------------------------------|----------|-----------|--------|---------|--------|------|---------------------|--------|--------|
| 268.1080  | 1 | C <sub>15</sub> H <sub>14</sub> N <sub>2</sub> O <sub>2</sub> | 268.1081 | 0.1       | 4.4    | 1       | 100.00 | 10.5 | even                | ok     | M+H    |

HRMS (ESI) of compound **3bd**

Tina-6019-P2

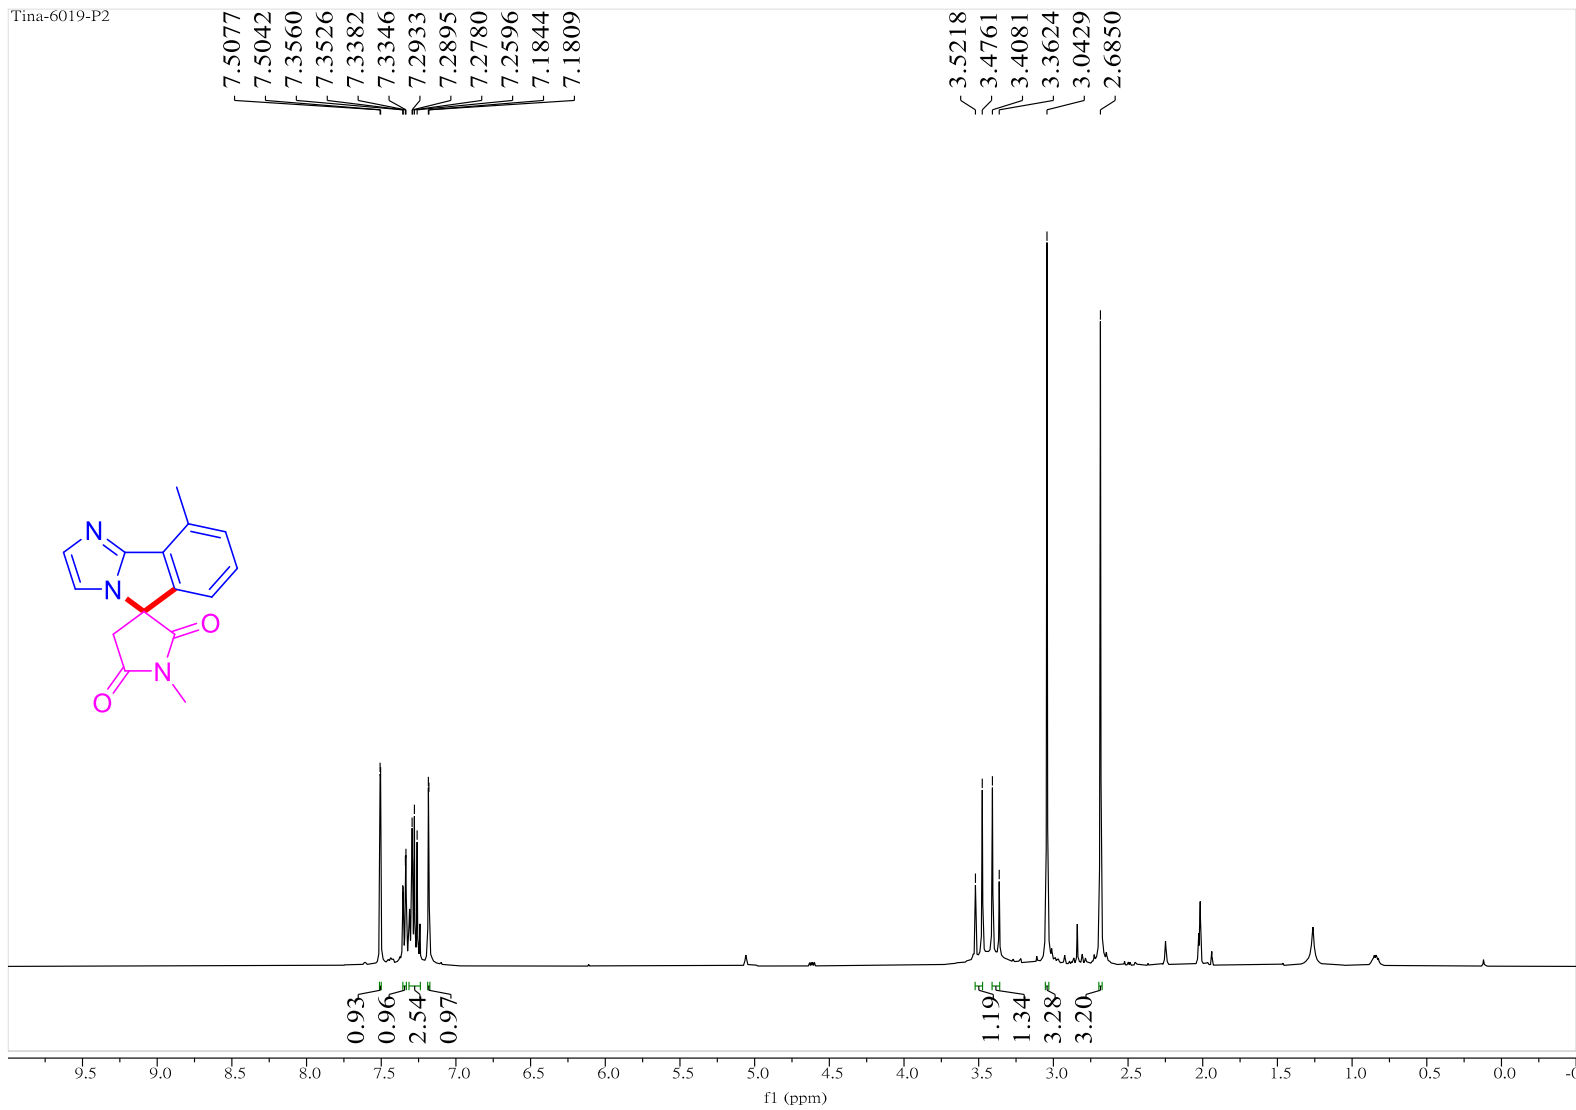

$^1\text{H}$  NMR spectrum (400 MHz) of compound **5bd** in  $d_6$ -acetone.

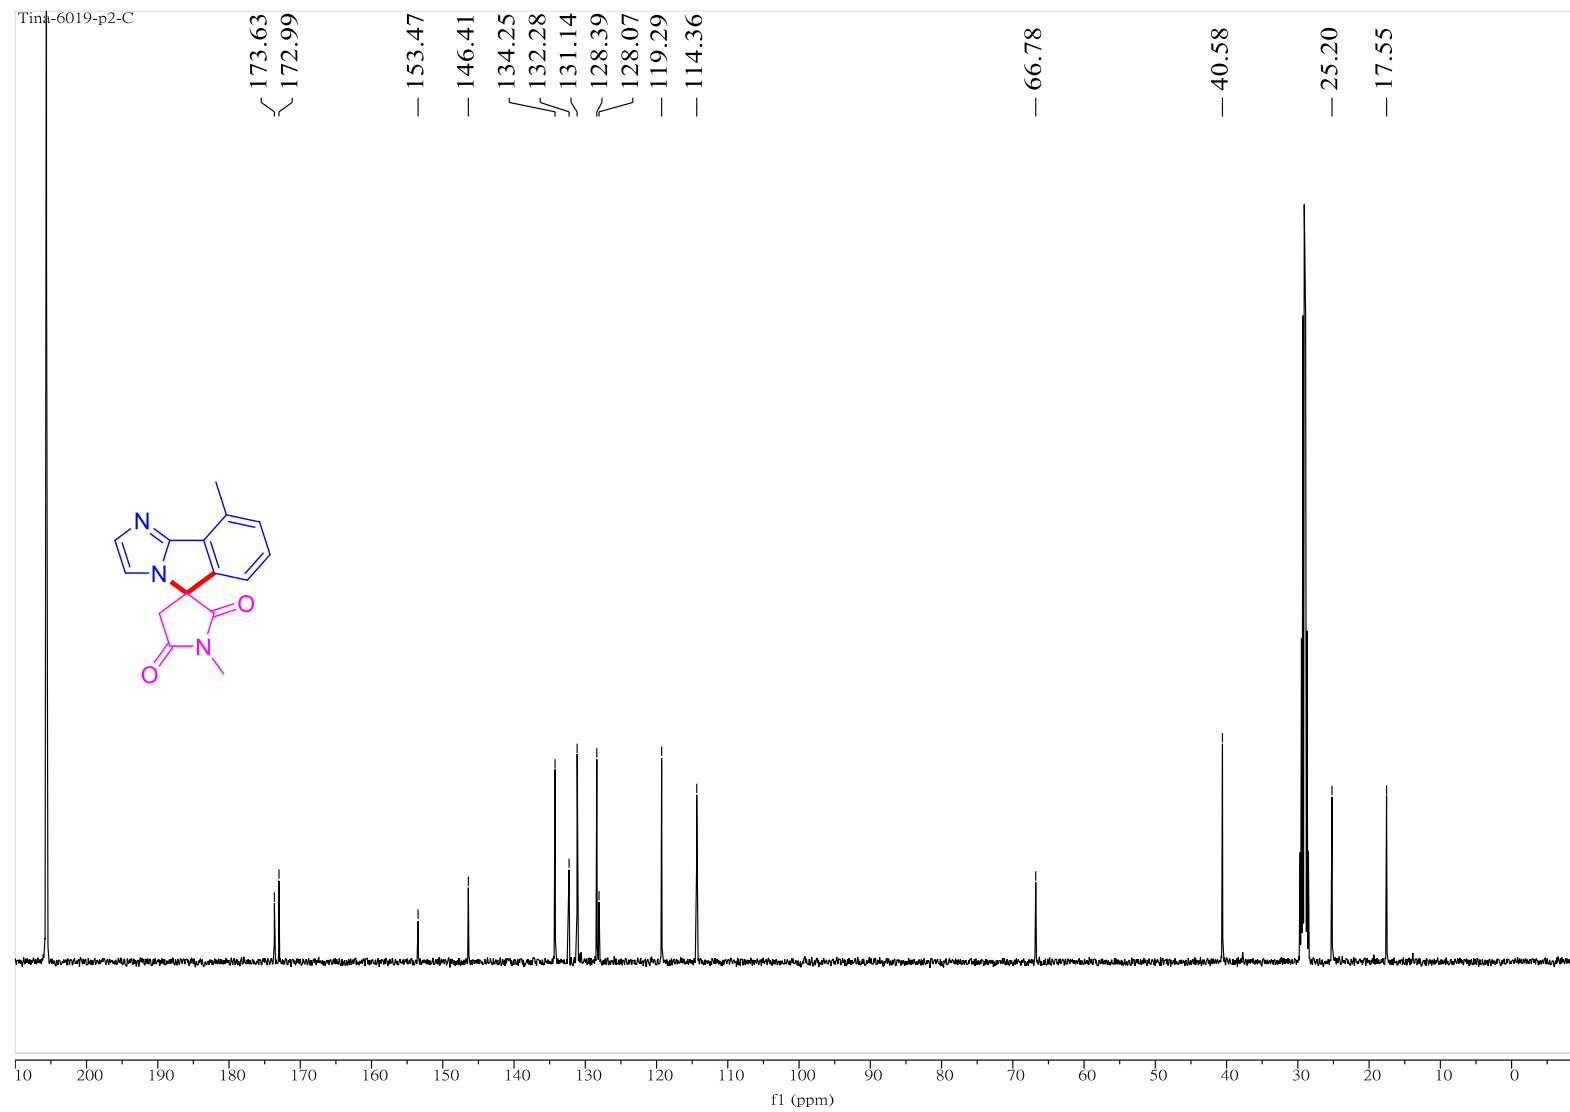



$^{13}\text{C}$  NMR spectrum (100 MHz) of compound **5bd** in  $d_6$ -acetone.

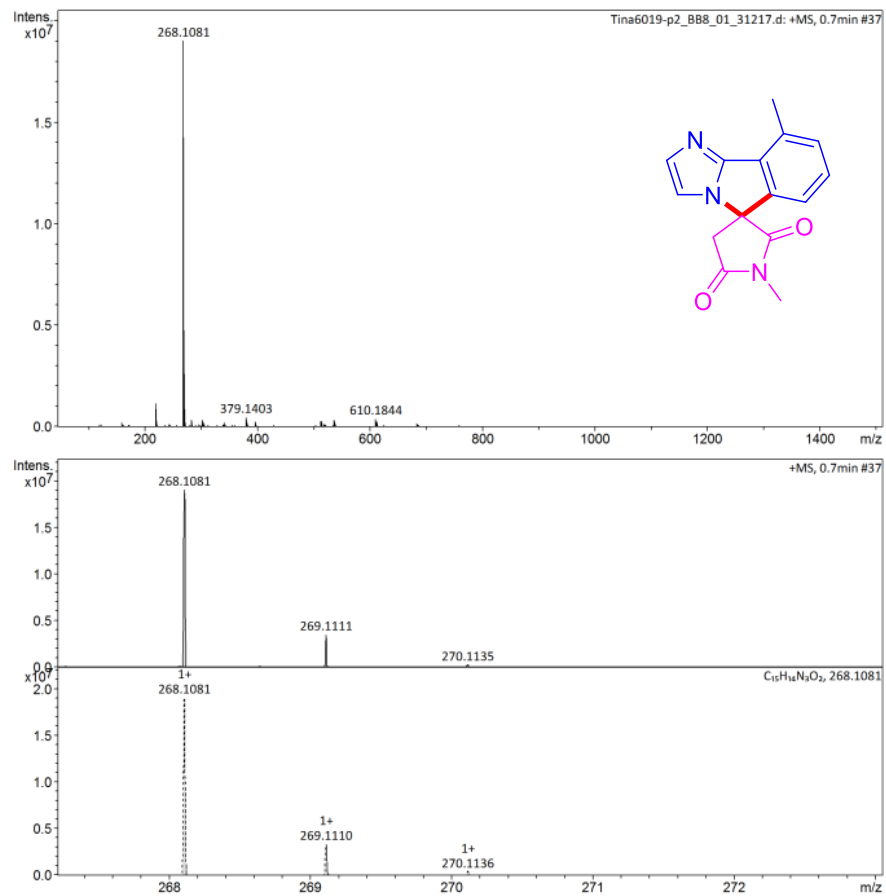

---

## Display Report

---

| Meas. m/z | # | Ion Formula | m/z      | err [ppm] | mSigma | # Sigma | Score  | rdb  | e <sup>-</sup> Conf | N-Rule | Adduct |
|-----------|---|-------------|----------|-----------|--------|---------|--------|------|---------------------|--------|--------|
| 268.1081  | 1 | C15H14N3O2  | 268.1081 | 0.2       | 5.1    | 1       | 100.00 | 10.5 | even                | ok     | M+H    |

---

HRMS (ESI) of compound **5bd**

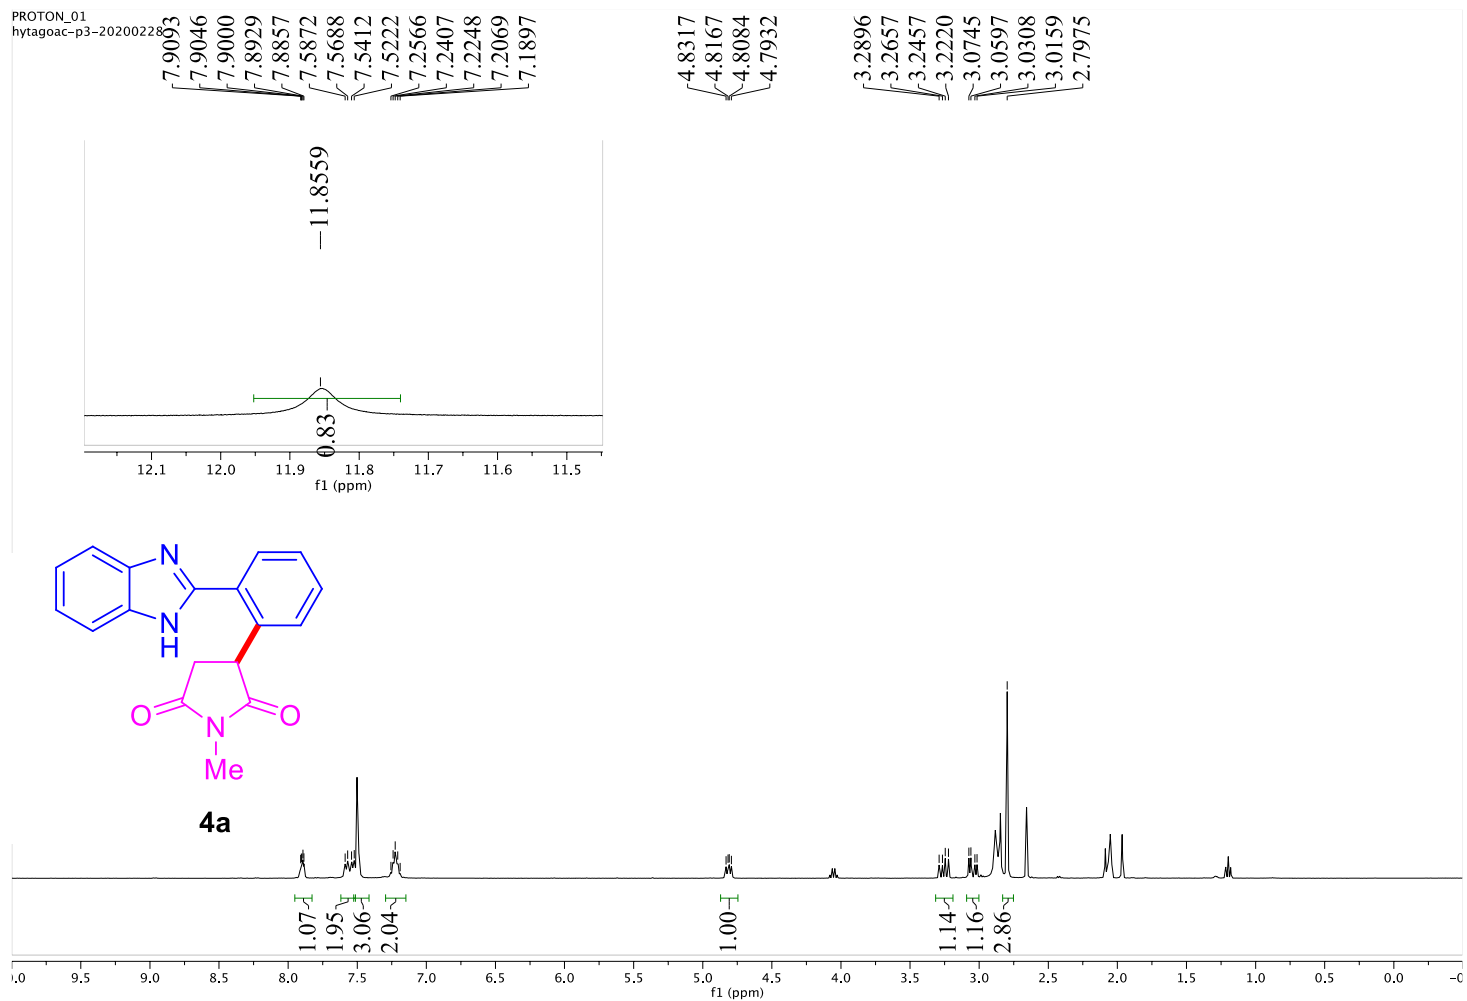

**<sup>1</sup>H NMR spectrum (400 MHz) of compound 4a in acetone-*d*<sub>6</sub>**

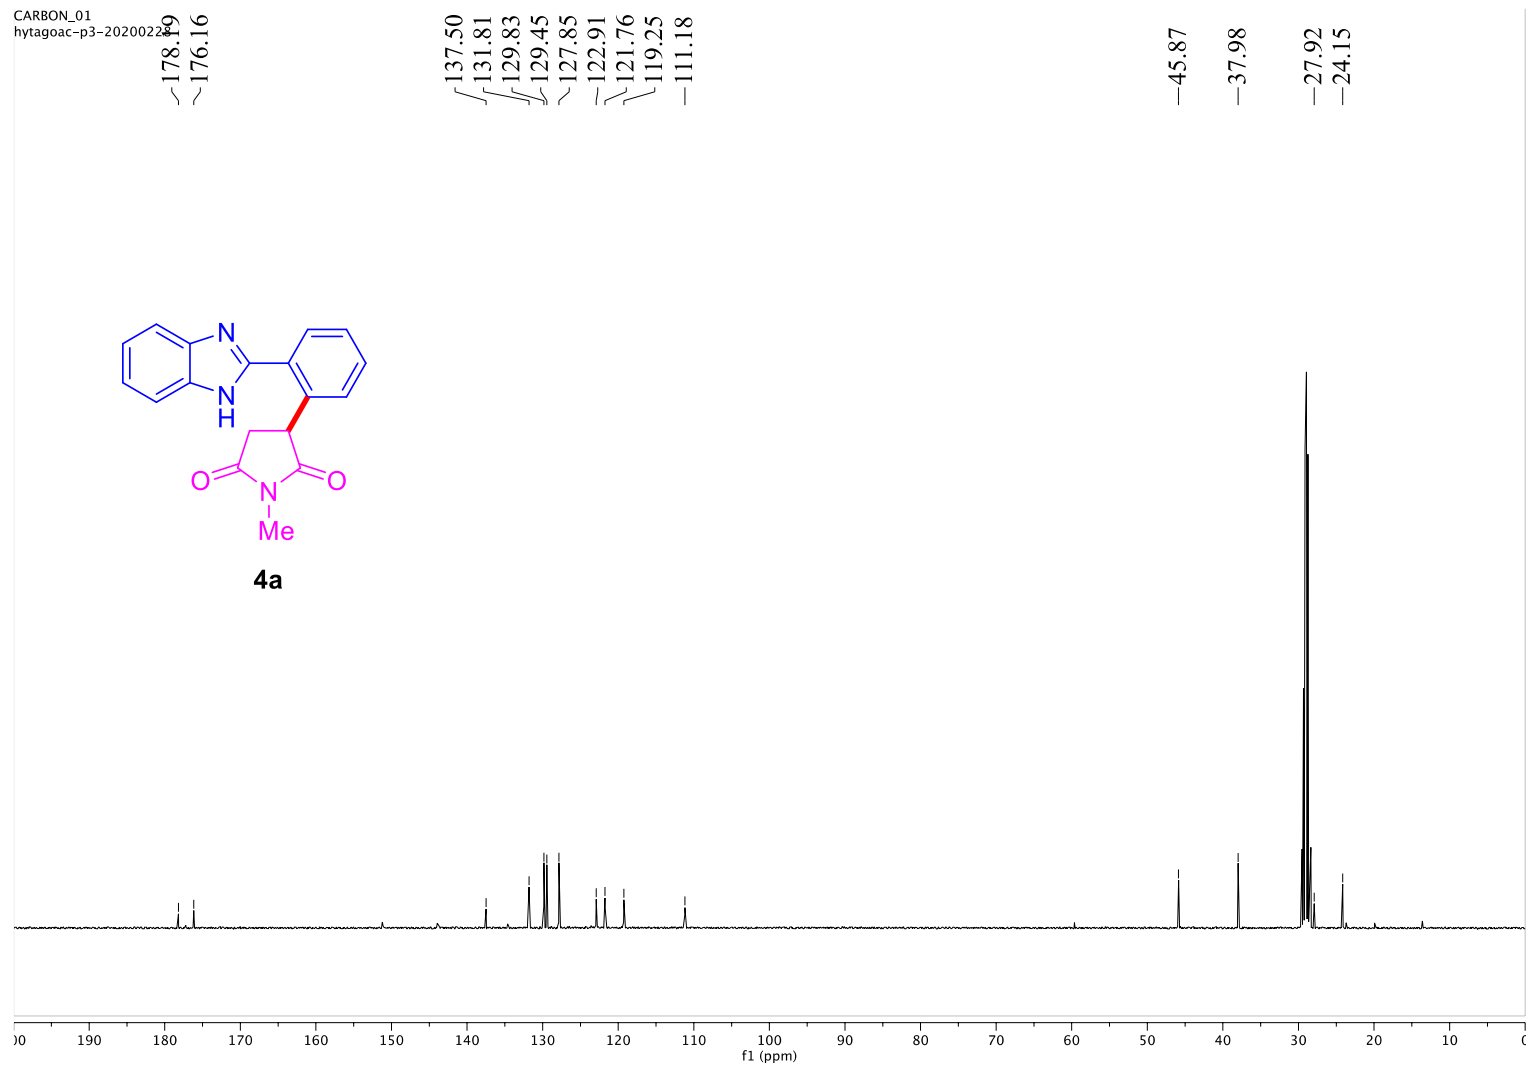

$^{13}\text{C}$  NMR spectrum (100 MHz) of compound **4a** in acetone- $d_6$ .

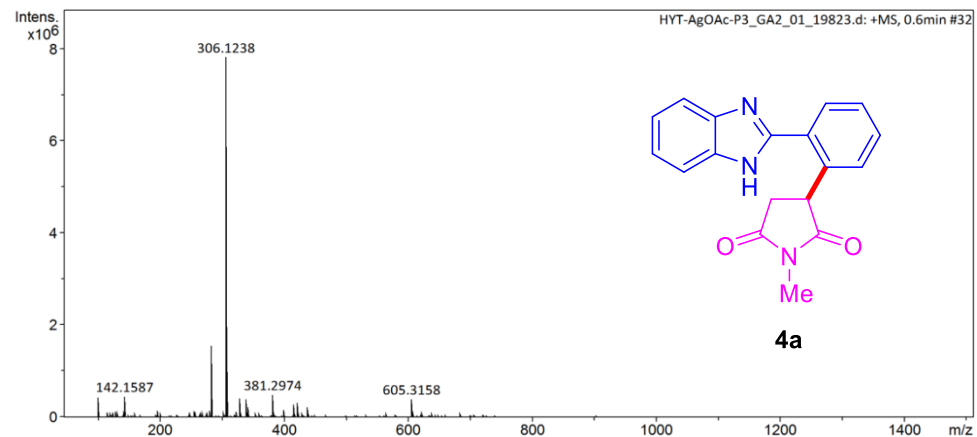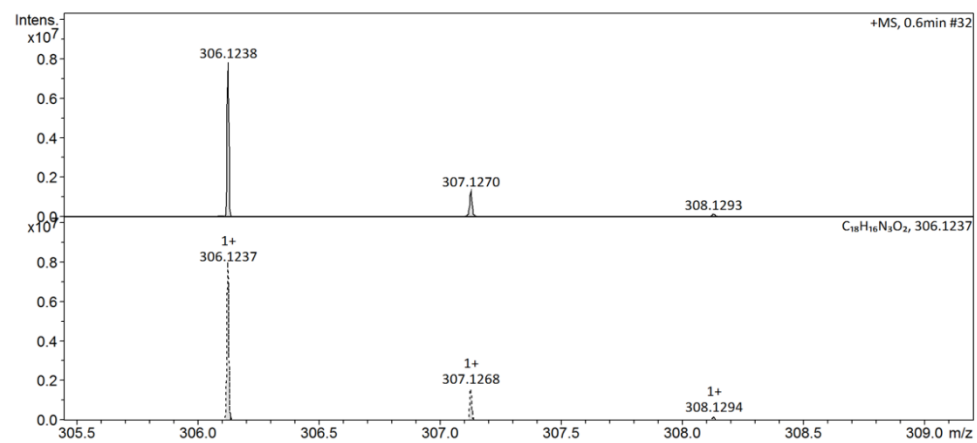

## Display Report

| Meas. m/z | # | Ion Formula                                                   | m/z      | err [ppm] | mSigma | # Sigma | Score  | rdb  | e <sup>-</sup> Conf | N-Rule | Adduct |
|-----------|---|---------------------------------------------------------------|----------|-----------|--------|---------|--------|------|---------------------|--------|--------|
| 306.1238  | 1 | C <sub>18</sub> H <sub>16</sub> N <sub>2</sub> O <sub>2</sub> | 306.1237 | -0.3      | 24.2   | 1       | 100.00 | 12.5 | even                | ok     | M+H    |

HRMS (ESI) of compound **4a**.

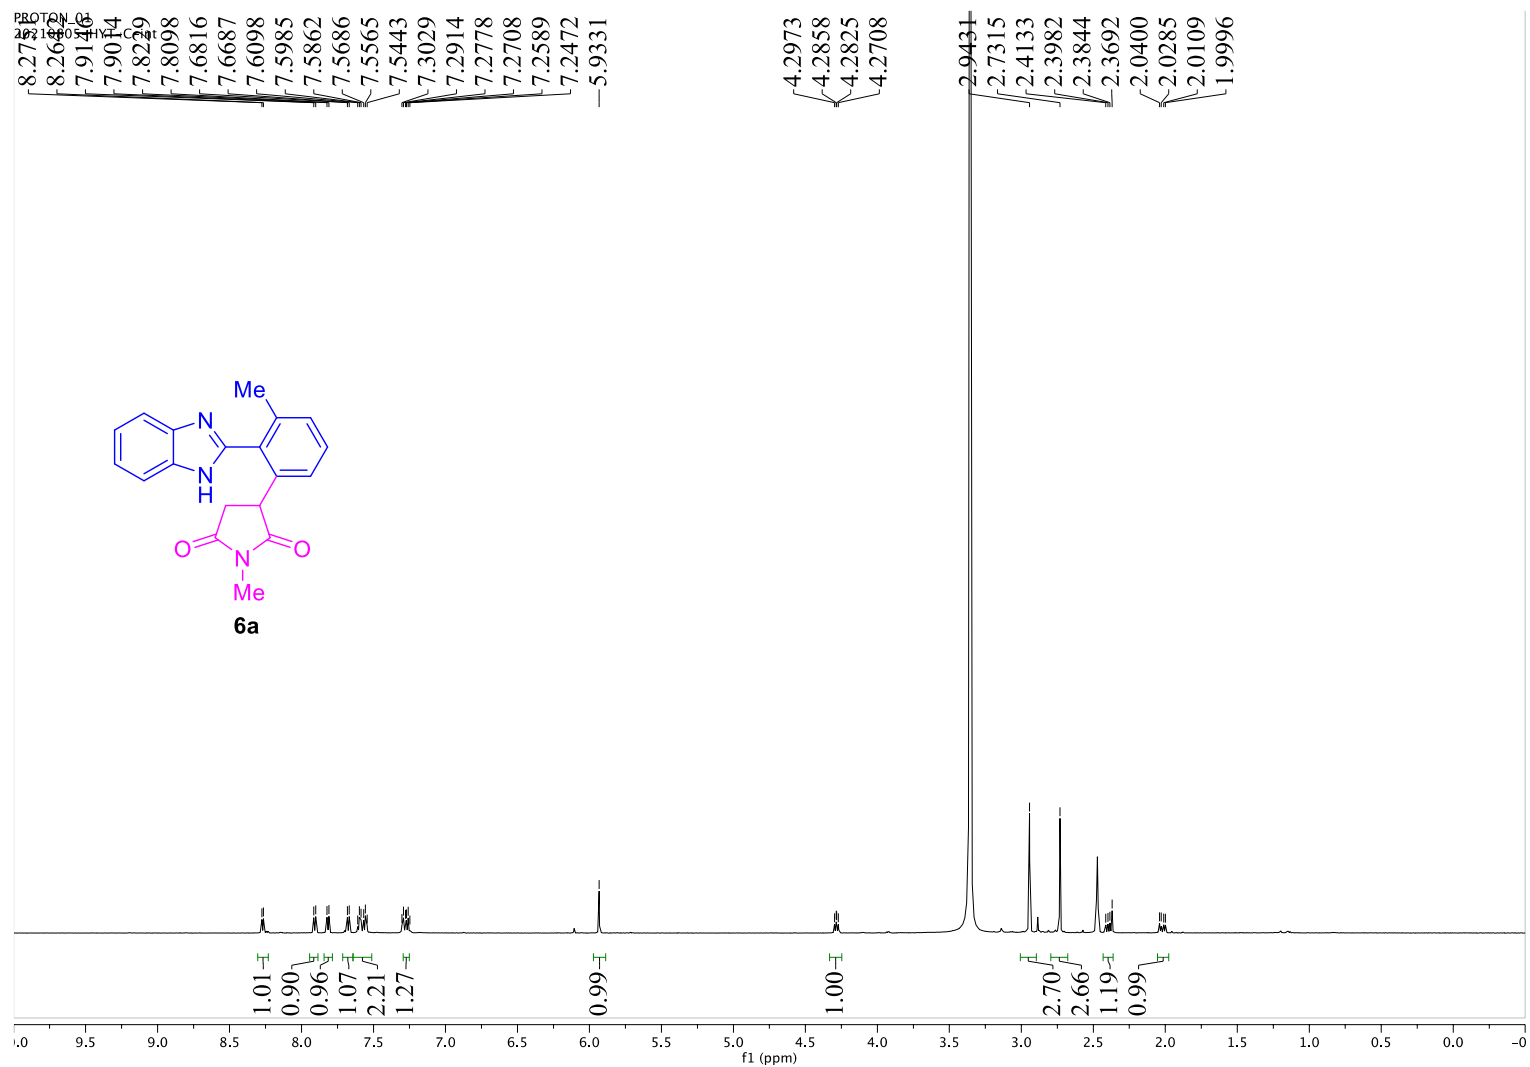

<sup>1</sup>H NMR spectrum (600 MHz) of compound **6a** in DMSO-*d*<sub>6</sub>.

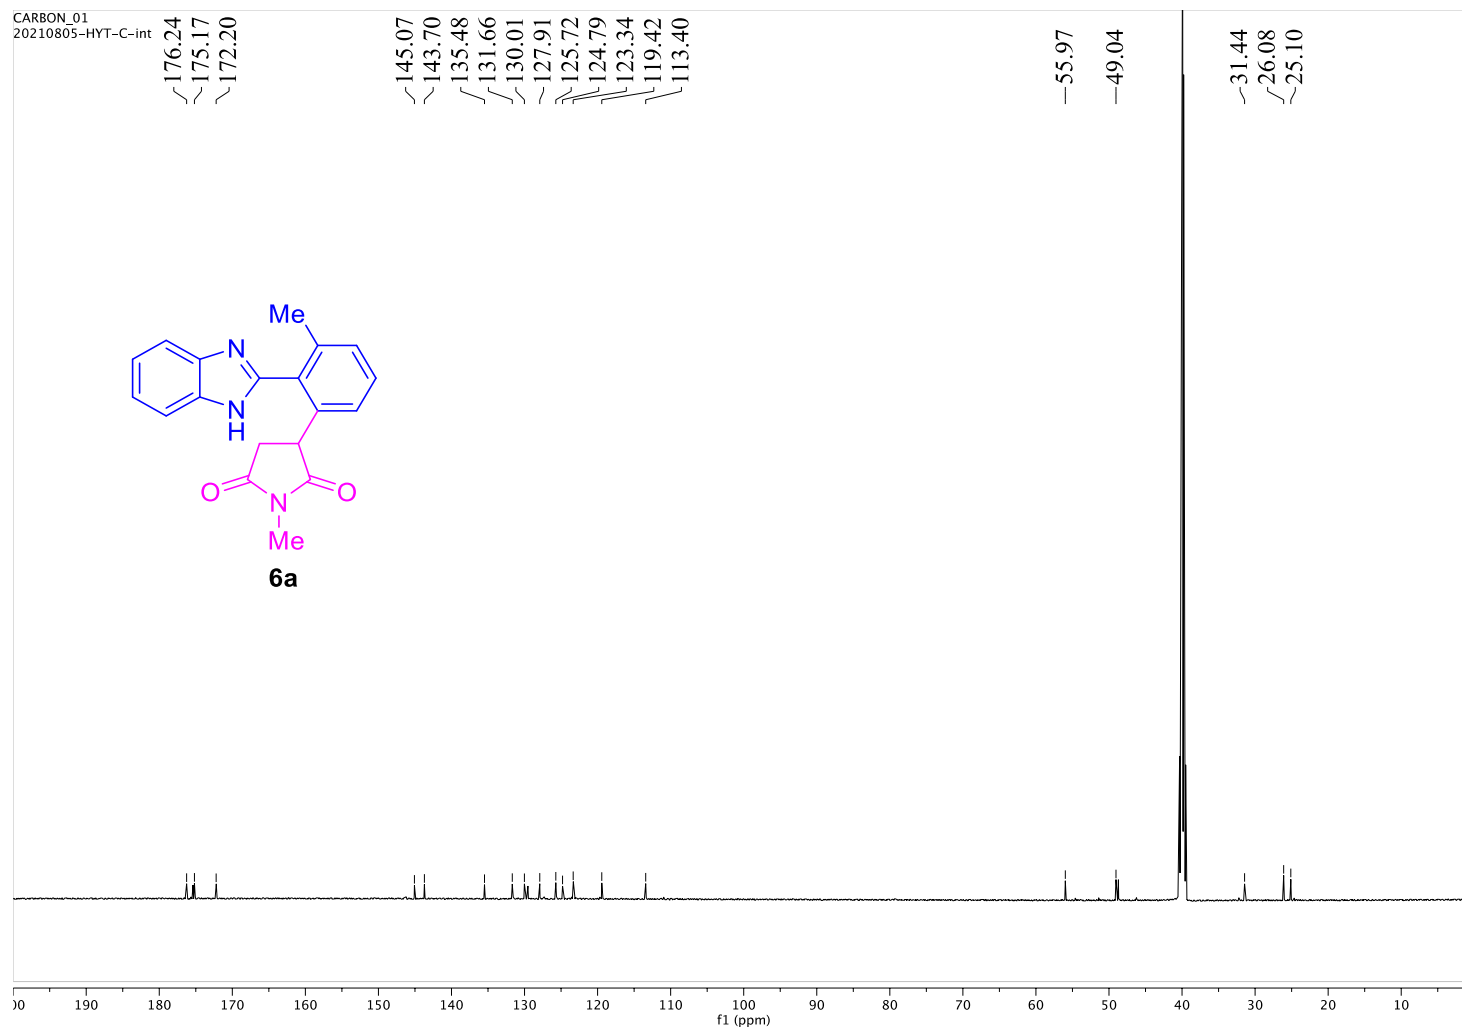

$^{13}\text{C}$  NMR spectrum (150 MHz) of compound **6a** in  $\text{DMSO-}d_6$ .

## X-ray crystallographic data of compound 3a

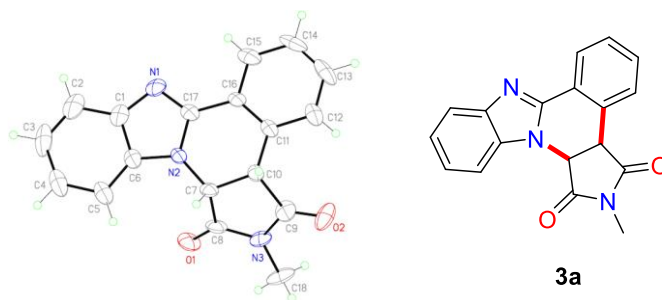

**ORTEP diagram of compound 3a.** Atomic displacement ellipsoids are drawn at the 50% probability level

### CCDC No. 2133408

Table S1. Crystal data and structure refinement for 200218lt\_0m\_a\_pl.

|                                 |                                                               |          |
|---------------------------------|---------------------------------------------------------------|----------|
| Identification code             | 200218lt_0m_a_pl                                              |          |
| Empirical formula               | C <sub>18</sub> H <sub>13</sub> N <sub>3</sub> O <sub>2</sub> |          |
| Formula weight                  | 303.31                                                        |          |
| Temperature                     | 100(2) K                                                      |          |
| Wavelength                      | 0.71073 Å                                                     |          |
| Crystal system                  | Orthorhombic                                                  |          |
| Space group                     | Pbca                                                          |          |
| Unit cell dimensions            | a = 16.2326(10) Å                                             | α = 90°. |
|                                 | b = 8.5326(5) Å                                               | β = 90°. |
|                                 | c = 20.3607(13) Å                                             | γ = 90°. |
| Volume                          | 2820.1(3) Å <sup>3</sup>                                      |          |
| Z                               | 8                                                             |          |
| Density (calculated)            | 1.429 Mg/m <sup>3</sup>                                       |          |
| Absorption coefficient          | 0.096 mm <sup>-1</sup>                                        |          |
| F(000)                          | 1264                                                          |          |
| Crystal size                    | 0.12 x 0.11 x 0.04 mm <sup>3</sup>                            |          |
| Theta range for data collection | 2.000 to 26.452°.                                             |          |
| Index ranges                    | -20 ≤ h ≤ 19, -10 ≤ k ≤ 10, -25 ≤ l ≤ 25                      |          |
| Reflections collected           | 18944                                                         |          |
| Independent reflections         | 2877 [R(int) = 0.0534]                                        |          |
| Completeness to theta = 25.242° | 100.0 %                                                       |          |
| Absorption correction           | Semi-empirical from equivalents                               |          |
| Max. and min. transmission      | 0.7454 and 0.5458                                             |          |



|                                   |                                             |
|-----------------------------------|---------------------------------------------|
| Refinement method                 | Full-matrix least-squares on F <sup>2</sup> |
| Data / restraints / parameters    | 2877 / 0 / 209                              |
| Goodness-of-fit on F <sup>2</sup> | 1.205                                       |
| Final R indices [I>2sigma(I)]     | R1 = 0.1443, wR2 = 0.3270                   |
| R indices (all data)              | R1 = 0.1653, wR2 = 0.3365                   |
| Extinction coefficient            | n/a                                         |
| Largest diff. peak and hole       | 0.425 and -0.563 e.Å <sup>-3</sup>          |

Table S2. Atomic coordinates ( x 10<sup>4</sup>) and equivalent isotropic displacement parameters (Å<sup>2</sup>x 10<sup>3</sup>) for 200218lt\_0m\_a\_pl. U(eq) is defined as one third of the trace of the orthogonalized U<sup>ij</sup> tensor.

|       | x       | y        | z       | U(eq) |
|-------|---------|----------|---------|-------|
| C(1)  | 953(4)  | 2124(9)  | 6047(3) | 33(2) |
| C(2)  | 940(5)  | 1404(12) | 6665(4) | 53(3) |
| C(3)  | 1520(5) | 1817(16) | 7124(4) | 75(4) |
| C(4)  | 2103(5) | 2988(14) | 6988(4) | 59(3) |
| C(5)  | 2130(4) | 3768(13) | 6391(3) | 49(3) |
| C(6)  | 1544(4) | 3321(10) | 5936(3) | 35(2) |
| C(7)  | 1743(4) | 5166(9)  | 4974(3) | 28(2) |
| C(8)  | 2598(4) | 4694(11) | 4702(4) | 36(2) |
| C(9)  | 1952(5) | 6114(11) | 3887(4) | 40(2) |
| C(10) | 1266(4) | 5759(8)  | 4380(3) | 26(1) |
| C(11) | 628(4)  | 4663(10) | 4091(3) | 29(2) |
| C(12) | 273(4)  | 5005(11) | 3481(3) | 40(2) |
| C(13) | -346(5) | 4014(13) | 3240(4) | 52(3) |
| C(14) | -629(4) | 2747(13) | 3593(4) | 51(3) |
| C(15) | -281(4) | 2407(11) | 4194(4) | 40(2) |
| C(16) | 348(4)  | 3377(9)  | 4450(3) | 29(2) |
| C(17) | 699(4)  | 2987(10) | 5093(3) | 30(2) |
| C(18) | 3431(5) | 5459(10) | 3711(4) | 46(2) |
| N(1)  | 437(3)  | 1948(8)  | 5513(3) | 33(1) |
| N(2)  | 1361(3) | 3859(7)  | 5315(2) | 26(1) |
| N(3)  | 2676(3) | 5436(8)  | 4104(3) | 34(2) |
| O(1)  | 3099(3) | 3883(7)  | 4962(3) | 42(1) |
| O(2)  | 1891(4) | 6865(7)  | 3381(3) | 50(2) |

Table S3. Bond lengths [Å] and angles [°] for 200218lt\_0m\_a\_pl.

---

|             |           |
|-------------|-----------|
| C(1)-N(1)   | 1.381(9)  |
| C(1)-C(2)   | 1.399(11) |
| C(1)-C(6)   | 1.420(11) |
| C(2)-C(3)   | 1.373(14) |
| C(2)-H(2)   | 0.9500    |
| C(3)-C(4)   | 1.404(16) |
| C(3)-H(3)   | 0.9500    |
| C(4)-C(5)   | 1.387(12) |
| C(4)-H(4)   | 0.9500    |
| C(5)-C(6)   | 1.381(10) |
| C(5)-H(5)   | 0.9500    |
| C(6)-N(2)   | 1.377(9)  |
| C(7)-N(2)   | 1.453(9)  |
| C(7)-C(10)  | 1.523(9)  |
| C(7)-C(8)   | 1.548(9)  |
| C(7)-H(7)   | 1.0000    |
| C(8)-O(1)   | 1.192(9)  |
| C(8)-N(3)   | 1.377(10) |
| C(9)-O(2)   | 1.217(10) |
| C(9)-N(3)   | 1.382(10) |
| C(9)-C(10)  | 1.530(9)  |
| C(10)-C(11) | 1.514(10) |
| C(10)-H(10) | 1.0000    |
| C(11)-C(16) | 1.395(11) |
| C(11)-C(12) | 1.399(9)  |
| C(12)-C(13) | 1.402(12) |
| C(12)-H(12) | 0.9500    |
| C(13)-C(14) | 1.377(14) |
| C(13)-H(13) | 0.9500    |
| C(14)-C(15) | 1.378(12) |
| C(14)-H(14) | 0.9500    |
| C(15)-C(16) | 1.414(10) |
| C(15)-H(15) | 0.9500    |
| C(16)-C(17) | 1.466(9)  |
| C(17)-N(1)  | 1.304(9)  |
| C(17)-N(2)  | 1.383(9)  |

|                  |          |
|------------------|----------|
| C(18)-N(3)       | 1.465(8) |
| C(18)-H(18A)     | 0.9800   |
| C(18)-H(18B)     | 0.9800   |
| C(18)-H(18C)     | 0.9800   |
|                  |          |
| N(1)-C(1)-C(2)   | 130.6(8) |
| N(1)-C(1)-C(6)   | 111.3(6) |
| C(2)-C(1)-C(6)   | 118.0(8) |
| C(3)-C(2)-C(1)   | 119.4(9) |
| C(3)-C(2)-H(2)   | 120.3    |
| C(1)-C(2)-H(2)   | 120.3    |
| C(2)-C(3)-C(4)   | 120.6(8) |
| C(2)-C(3)-H(3)   | 119.7    |
| C(4)-C(3)-H(3)   | 119.7    |
| C(5)-C(4)-C(3)   | 122.4(8) |
| C(5)-C(4)-H(4)   | 118.8    |
| C(3)-C(4)-H(4)   | 118.8    |
| C(6)-C(5)-C(4)   | 115.7(9) |
| C(6)-C(5)-H(5)   | 122.1    |
| C(4)-C(5)-H(5)   | 122.1    |
| N(2)-C(6)-C(5)   | 132.3(8) |
| N(2)-C(6)-C(1)   | 103.9(6) |
| C(5)-C(6)-C(1)   | 123.8(7) |
| N(2)-C(7)-C(10)  | 114.6(5) |
| N(2)-C(7)-C(8)   | 110.8(6) |
| C(10)-C(7)-C(8)  | 105.0(5) |
| N(2)-C(7)-H(7)   | 108.8    |
| C(10)-C(7)-H(7)  | 108.8    |
| C(8)-C(7)-H(7)   | 108.8    |
| O(1)-C(8)-N(3)   | 126.7(6) |
| O(1)-C(8)-C(7)   | 127.1(7) |
| N(3)-C(8)-C(7)   | 106.2(6) |
| O(2)-C(9)-N(3)   | 124.0(7) |
| O(2)-C(9)-C(10)  | 126.9(7) |
| N(3)-C(9)-C(10)  | 109.0(6) |
| C(11)-C(10)-C(7) | 116.8(6) |
| C(11)-C(10)-C(9) | 111.4(6) |
| C(7)-C(10)-C(9)  | 102.5(5) |

|                     |          |
|---------------------|----------|
| C(11)-C(10)-H(10)   | 108.6    |
| C(7)-C(10)-H(10)    | 108.6    |
| C(9)-C(10)-H(10)    | 108.6    |
| C(16)-C(11)-C(12)   | 119.6(7) |
| C(16)-C(11)-C(10)   | 120.4(6) |
| C(12)-C(11)-C(10)   | 119.9(7) |
| C(11)-C(12)-C(13)   | 118.7(8) |
| C(11)-C(12)-H(12)   | 120.6    |
| C(13)-C(12)-H(12)   | 120.6    |
| C(14)-C(13)-C(12)   | 122.0(7) |
| C(14)-C(13)-H(13)   | 119.0    |
| C(12)-C(13)-H(13)   | 119.0    |
| C(13)-C(14)-C(15)   | 119.4(7) |
| C(13)-C(14)-H(14)   | 120.3    |
| C(15)-C(14)-H(14)   | 120.3    |
| C(14)-C(15)-C(16)   | 120.0(9) |
| C(14)-C(15)-H(15)   | 120.0    |
| C(16)-C(15)-H(15)   | 120.0    |
| C(11)-C(16)-C(15)   | 120.2(7) |
| C(11)-C(16)-C(17)   | 121.3(6) |
| C(15)-C(16)-C(17)   | 118.5(7) |
| N(1)-C(17)-N(2)     | 113.9(6) |
| N(1)-C(17)-C(16)    | 127.9(6) |
| N(2)-C(17)-C(16)    | 118.2(7) |
| N(3)-C(18)-H(18A)   | 109.5    |
| N(3)-C(18)-H(18B)   | 109.5    |
| H(18A)-C(18)-H(18B) | 109.5    |
| N(3)-C(18)-H(18C)   | 109.5    |
| H(18A)-C(18)-H(18C) | 109.5    |
| H(18B)-C(18)-H(18C) | 109.5    |
| C(17)-N(1)-C(1)     | 104.2(6) |
| C(6)-N(2)-C(17)     | 106.8(6) |
| C(6)-N(2)-C(7)      | 127.0(6) |
| C(17)-N(2)-C(7)     | 126.1(6) |
| C(8)-N(3)-C(9)      | 113.4(6) |
| C(8)-N(3)-C(18)     | 124.4(7) |
| C(9)-N(3)-C(18)     | 122.1(7) |

Symmetry transformations used to generate equivalent atoms:

Table S4. Anisotropic displacement parameters ( $\text{\AA}^2 \times 10^3$ ) for 200218lt\_0m\_a\_pl. The anisotropic displacement factor exponent takes the form:  $-2\pi^2 [ h^2 a^{*2} U^{11} + \dots + 2 h k a^* b^* U^{12} ]$

|       | $U^{11}$ | $U^{22}$ | $U^{33}$ | $U^{23}$ | $U^{13}$ | $U^{12}$ |
|-------|----------|----------|----------|----------|----------|----------|
| C(1)  | 30(3)    | 38(4)    | 31(4)    | 0(3)     | 13(3)    | 16(3)    |
| C(2)  | 38(4)    | 71(7)    | 50(5)    | 19(5)    | 22(4)    | 23(4)    |
| C(3)  | 44(5)    | 146(12)  | 35(5)    | 35(6)    | 21(4)    | 52(6)    |
| C(4)  | 31(4)    | 121(9)   | 24(4)    | -1(5)    | 4(3)     | 33(5)    |
| C(5)  | 20(3)    | 103(8)   | 23(3)    | -7(4)    | 5(3)     | 19(4)    |
| C(6)  | 20(3)    | 64(5)    | 22(3)    | -3(3)    | 7(3)     | 11(3)    |
| C(7)  | 15(3)    | 40(4)    | 29(3)    | -5(3)    | 3(3)     | -1(3)    |
| C(8)  | 13(3)    | 56(5)    | 40(4)    | -4(4)    | 1(3)     | -5(3)    |
| C(9)  | 31(4)    | 56(5)    | 32(4)    | -5(4)    | 11(3)    | 9(4)     |
| C(10) | 20(3)    | 33(4)    | 24(3)    | 0(3)     | 1(2)     | 4(3)     |
| C(11) | 14(3)    | 54(5)    | 20(3)    | -9(3)    | 3(2)     | 11(3)    |
| C(12) | 22(3)    | 73(6)    | 25(3)    | -4(4)    | 2(3)     | 22(4)    |
| C(13) | 26(4)    | 98(8)    | 32(4)    | -24(5)   | -10(3)   | 33(5)    |
| C(14) | 17(3)    | 92(8)    | 44(5)    | -43(5)   | -1(3)    | -4(4)    |
| C(15) | 17(3)    | 68(6)    | 35(4)    | -23(4)   | 7(3)     | 0(4)     |
| C(16) | 13(3)    | 53(5)    | 22(3)    | -8(3)    | 6(2)     | 0(3)     |
| C(17) | 14(3)    | 52(5)    | 24(3)    | -11(3)   | 7(2)     | 6(3)     |
| C(18) | 31(4)    | 42(5)    | 64(5)    | -9(4)    | 30(4)    | -8(4)    |
| N(1)  | 24(3)    | 42(4)    | 34(3)    | -2(3)    | 12(2)    | 1(3)     |
| N(2)  | 15(2)    | 43(4)    | 19(3)    | -4(2)    | 2(2)     | 4(2)     |
| N(3)  | 20(3)    | 43(4)    | 40(3)    | -2(3)    | 14(2)    | 0(3)     |
| O(1)  | 17(2)    | 59(4)    | 50(3)    | -1(3)    | -2(2)    | 9(2)     |
| O(2)  | 55(3)    | 55(4)    | 41(3)    | 14(3)    | 27(3)    | 19(3)    |

Table S5. Hydrogen coordinates ( $\times 10^4$ ) and isotropic displacement parameters ( $\text{\AA}^2 \times 10^{-3}$ ) for 200218lt\_0m\_a\_pl.

|        | x     | y    | z    | U(eq) |
|--------|-------|------|------|-------|
| H(2)   | 535   | 638  | 6765 | 64    |
| H(3)   | 1526  | 1305 | 7539 | 90    |
| H(4)   | 2493  | 3255 | 7317 | 70    |
| H(5)   | 2526  | 4559 | 6301 | 59    |
| H(7)   | 1817  | 6050 | 5291 | 34    |
| H(10)  | 989   | 6766 | 4501 | 31    |
| H(12)  | 448   | 5891 | 3236 | 48    |
| H(13)  | -577  | 4223 | 2821 | 63    |
| H(14)  | -1061 | 2113 | 3424 | 61    |
| H(15)  | -463  | 1520 | 4436 | 48    |
| H(18A) | 3320  | 5007 | 3277 | 69    |
| H(18B) | 3858  | 4842 | 3932 | 69    |
| H(18C) | 3621  | 6542 | 3660 | 69    |

## X-ray crystallographic data of compound 5aa

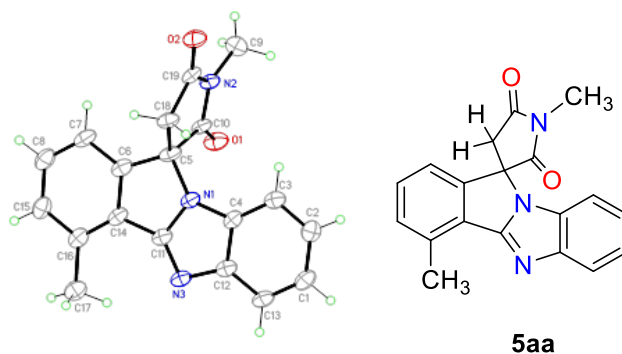

**ORTEP diagram of compound 5aa.** Atomic displacement ellipsoids are drawn at the 50% probability level

### CCDC No. 2131034

Table S6. Crystal data and structure refinement for 200739lt\_0m.

|                                 |                                                               |                 |
|---------------------------------|---------------------------------------------------------------|-----------------|
| Identification code             | 200739LT_0m                                                   |                 |
| Empirical formula               | C <sub>19</sub> H <sub>15</sub> N <sub>3</sub> O <sub>2</sub> |                 |
| Formula weight                  | 317.34                                                        |                 |
| Temperature                     | 100(2) K                                                      |                 |
| Wavelength                      | 0.71073 Å                                                     |                 |
| Crystal system                  | Monoclinic                                                    |                 |
| Space group                     | C2/c                                                          |                 |
| Unit cell dimensions            | a = 18.0754(12) Å                                             | α = 90°.        |
|                                 | b = 15.6627(11) Å                                             | β = 91.250(3)°. |
|                                 | c = 11.5969(6) Å                                              | γ = 90°.        |
| Volume                          | 3282.4(4) Å <sup>3</sup>                                      |                 |
| Z                               | 8                                                             |                 |
| Density (calculated)            | 1.284 Mg/m <sup>3</sup>                                       |                 |
| Absorption coefficient          | 0.086 mm <sup>-1</sup>                                        |                 |
| F(000)                          | 1328                                                          |                 |
| Crystal size                    | 0.15 x 0.02 x 0.01 mm <sup>3</sup>                            |                 |
| Theta range for data collection | 1.721 to 26.336°.                                             |                 |
| Index ranges                    | -22 ≤ h ≤ 22, -19 ≤ k ≤ 19, -14 ≤ l ≤ 9                       |                 |
| Reflections collected           | 10299                                                         |                 |
| Independent reflections         | 3328 [R(int) = 0.0471]                                        |                 |
| Completeness to theta = 25.242° | 99.9 %                                                        |                 |

|                                   |                                             |
|-----------------------------------|---------------------------------------------|
| Absorption correction             | Semi-empirical from equivalents             |
| Max. and min. transmission        | 0.7454 and 0.6768                           |
| Refinement method                 | Full-matrix least-squares on F <sup>2</sup> |
| Data / restraints / parameters    | 3328 / 0 / 219                              |
| Goodness-of-fit on F <sup>2</sup> | 1.060                                       |
| Final R indices [I>2sigma(I)]     | R1 = 0.0688, wR2 = 0.1769                   |
| R indices (all data)              | R1 = 0.1152, wR2 = 0.2016                   |
| Extinction coefficient            | n/a                                         |
| Largest diff. peak and hole       | 1.131 and -0.244 e.Å <sup>-3</sup>          |

Table S7. Atomic coordinates ( x 10<sup>4</sup>) and equivalent isotropic displacement parameters (Å<sup>2</sup>x 10<sup>3</sup>) for 200739lt\_0m. U(eq) is defined as one third of the trace of the orthogonalized U<sup>ij</sup> tensor.

|       | x        | y       | z        | U(eq) |
|-------|----------|---------|----------|-------|
| O(1)  | 364(1)   | 611(2)  | 9011(2)  | 33(1) |
| O(2)  | -684(1)  | 2698(2) | 11183(2) | 35(1) |
| N(1)  | 1528(2)  | 1920(2) | 9354(2)  | 25(1) |
| N(2)  | -318(2)  | 1570(2) | 10062(2) | 24(1) |
| N(3)  | 2677(2)  | 1706(2) | 8677(2)  | 26(1) |
| C(1)  | 1976(2)  | 3159(2) | 6338(3)  | 34(1) |
| C(2)  | 1264(2)  | 3299(2) | 6758(3)  | 33(1) |
| C(3)  | 1036(2)  | 2912(2) | 7773(3)  | 30(1) |
| C(4)  | 1553(2)  | 2396(2) | 8347(3)  | 24(1) |
| C(5)  | 994(2)   | 1695(2) | 10224(3) | 28(1) |
| C(6)  | 1466(2)  | 1093(2) | 10969(3) | 27(1) |
| C(7)  | 1265(2)  | 653(2)  | 11970(3) | 31(1) |
| C(8)  | 1782(2)  | 109(2)  | 12473(3) | 34(1) |
| C(9)  | -1050(2) | 1247(2) | 9747(3)  | 32(1) |
| C(10) | 328(2)   | 1212(2) | 9670(3)  | 25(1) |
| C(11) | 2202(2)  | 1522(2) | 9479(3)  | 25(1) |
| C(12) | 2271(2)  | 2255(2) | 7941(3)  | 26(1) |
| C(13) | 2485(2)  | 2643(2) | 6917(3)  | 30(1) |
| C(14) | 2169(2)  | 977(2)  | 10514(3) | 25(1) |
| C(15) | 2472(2)  | -17(2)  | 11996(3) | 32(1) |
| C(16) | 2685(2)  | 413(2)  | 10995(3) | 29(1) |
| C(17) | 3430(2)  | 261(2)  | 10466(3) | 35(1) |
| C(18) | 627(2)   | 2453(2) | 10848(3) | 28(1) |



C(19)                      -195(2)                      2292(2)                      10748(3)                      25(1)

---

Table S8. Bond lengths [Å] and angles [°] for 200739lt\_0m.

---

|             |          |
|-------------|----------|
| O(1)-C(10)  | 1.214(4) |
| O(2)-C(19)  | 1.208(4) |
| N(1)-C(11)  | 1.373(4) |
| N(1)-C(4)   | 1.387(4) |
| N(1)-C(5)   | 1.455(4) |
| N(2)-C(10)  | 1.382(4) |
| N(2)-C(19)  | 1.397(4) |
| N(2)-C(9)   | 1.454(4) |
| N(3)-C(11)  | 1.310(4) |
| N(3)-C(12)  | 1.407(4) |
| C(1)-C(13)  | 1.387(5) |
| C(1)-C(2)   | 1.403(5) |
| C(1)-H(1)   | 0.9500   |
| C(2)-C(3)   | 1.395(5) |
| C(2)-H(5)   | 0.9500   |
| C(3)-C(4)   | 1.394(5) |
| C(3)-H(6)   | 0.9500   |
| C(4)-C(12)  | 1.407(5) |
| C(5)-C(6)   | 1.529(5) |
| C(5)-C(18)  | 1.547(4) |
| C(5)-C(10)  | 1.549(4) |
| C(6)-C(14)  | 1.397(5) |
| C(6)-C(7)   | 1.404(4) |
| C(7)-C(8)   | 1.384(5) |
| C(7)-H(7)   | 0.9500   |
| C(8)-C(15)  | 1.389(5) |
| C(8)-H(2)   | 0.9500   |
| C(9)-H(3)   | 0.9800   |
| C(9)-H(14)  | 0.9800   |
| C(9)-H(15)  | 0.9800   |
| C(11)-C(14) | 1.476(4) |
| C(12)-C(13) | 1.397(4) |
| C(13)-H(4)  | 0.9500   |

|             |          |
|-------------|----------|
| C(14)-C(16) | 1.392(5) |
| C(15)-C(16) | 1.404(5) |
| C(15)-H(11) | 0.9500   |
| C(16)-C(17) | 1.511(5) |
| C(17)-H(8)  | 0.9800   |
| C(17)-H(9)  | 0.9800   |
| C(17)-H(10) | 0.9800   |
| C(18)-C(19) | 1.510(5) |
| C(18)-H(13) | 0.9900   |
| C(18)-H(12) | 0.9900   |

|                  |          |
|------------------|----------|
| C(11)-N(1)-C(4)  | 106.7(3) |
| C(11)-N(1)-C(5)  | 114.8(3) |
| C(4)-N(1)-C(5)   | 138.4(3) |
| C(10)-N(2)-C(19) | 113.0(3) |
| C(10)-N(2)-C(9)  | 123.1(3) |
| C(19)-N(2)-C(9)  | 123.9(3) |
| C(11)-N(3)-C(12) | 103.0(3) |
| C(13)-C(1)-C(2)  | 121.8(3) |
| C(13)-C(1)-H(1)  | 119.1    |
| C(2)-C(1)-H(1)   | 119.1    |
| C(3)-C(2)-C(1)   | 121.0(3) |
| C(3)-C(2)-H(5)   | 119.5    |
| C(1)-C(2)-H(5)   | 119.5    |
| C(2)-C(3)-C(4)   | 116.6(3) |
| C(2)-C(3)-H(6)   | 121.7    |
| C(4)-C(3)-H(6)   | 121.7    |
| N(1)-C(4)-C(3)   | 132.8(3) |
| N(1)-C(4)-C(12)  | 104.2(3) |
| C(3)-C(4)-C(12)  | 123.0(3) |
| N(1)-C(5)-C(6)   | 99.8(3)  |
| N(1)-C(5)-C(18)  | 115.9(3) |
| C(6)-C(5)-C(18)  | 116.7(3) |
| N(1)-C(5)-C(10)  | 110.7(2) |
| C(6)-C(5)-C(10)  | 110.6(3) |
| C(18)-C(5)-C(10) | 103.5(3) |
| C(14)-C(6)-C(7)  | 120.2(3) |
| C(14)-C(6)-C(5)  | 111.6(3) |

|                   |          |
|-------------------|----------|
| C(7)-C(6)-C(5)    | 128.2(3) |
| C(8)-C(7)-C(6)    | 117.7(3) |
| C(8)-C(7)-H(7)    | 121.1    |
| C(6)-C(7)-H(7)    | 121.1    |
| C(7)-C(8)-C(15)   | 121.6(3) |
| C(7)-C(8)-H(2)    | 119.2    |
| C(15)-C(8)-H(2)   | 119.2    |
| N(2)-C(9)-H(3)    | 109.5    |
| N(2)-C(9)-H(14)   | 109.5    |
| H(3)-C(9)-H(14)   | 109.5    |
| N(2)-C(9)-H(15)   | 109.5    |
| H(3)-C(9)-H(15)   | 109.5    |
| H(14)-C(9)-H(15)  | 109.5    |
| O(1)-C(10)-N(2)   | 125.4(3) |
| O(1)-C(10)-C(5)   | 126.0(3) |
| N(2)-C(10)-C(5)   | 108.6(3) |
| N(3)-C(11)-N(1)   | 114.7(3) |
| N(3)-C(11)-C(14)  | 138.1(3) |
| N(1)-C(11)-C(14)  | 107.2(3) |
| C(13)-C(12)-C(4)  | 119.4(3) |
| C(13)-C(12)-N(3)  | 129.2(3) |
| C(4)-C(12)-N(3)   | 111.4(3) |
| C(1)-C(13)-C(12)  | 118.2(3) |
| C(1)-C(13)-H(4)   | 120.9    |
| C(12)-C(13)-H(4)  | 120.9    |
| C(16)-C(14)-C(6)  | 122.5(3) |
| C(16)-C(14)-C(11) | 130.8(3) |
| C(6)-C(14)-C(11)  | 106.6(3) |
| C(8)-C(15)-C(16)  | 121.8(3) |
| C(8)-C(15)-H(11)  | 119.1    |
| C(16)-C(15)-H(11) | 119.1    |
| C(14)-C(16)-C(15) | 116.2(3) |
| C(14)-C(16)-C(17) | 122.3(3) |
| C(15)-C(16)-C(17) | 121.5(3) |
| C(16)-C(17)-H(8)  | 109.5    |
| C(16)-C(17)-H(9)  | 109.5    |
| H(8)-C(17)-H(9)   | 109.5    |
| C(16)-C(17)-H(10) | 109.5    |

|                   |          |
|-------------------|----------|
| H(8)-C(17)-H(10)  | 109.5    |
| H(9)-C(17)-H(10)  | 109.5    |
| C(19)-C(18)-C(5)  | 105.4(3) |
| C(19)-C(18)-H(13) | 110.7    |
| C(5)-C(18)-H(13)  | 110.7    |
| C(19)-C(18)-H(12) | 110.7    |
| C(5)-C(18)-H(12)  | 110.7    |
| H(13)-C(18)-H(12) | 108.8    |
| O(2)-C(19)-N(2)   | 123.7(3) |
| O(2)-C(19)-C(18)  | 127.4(3) |
| N(2)-C(19)-C(18)  | 108.9(3) |

---

Symmetry transformations used to generate equivalent atoms:

Table S9. Anisotropic displacement parameters ( $\text{\AA}^2 \times 10^3$ ) for 200739lt\_0m. The anisotropic displacement factor exponent takes the form:  $-2\pi^2 [ h^2 a^{*2} U^{11} + \dots + 2 h k a^* b^* U^{12} ]$

|       | $U^{11}$ | $U^{22}$ | $U^{33}$ | $U^{23}$ | $U^{13}$ | $U^{12}$ |
|-------|----------|----------|----------|----------|----------|----------|
| O(1)  | 34(1)    | 32(1)    | 34(1)    | -14(1)   | 9(1)     | -7(1)    |
| O(2)  | 34(1)    | 36(1)    | 34(1)    | -9(1)    | 10(1)    | 3(1)     |
| N(1)  | 27(2)    | 27(1)    | 22(1)    | -3(1)    | 6(1)     | -5(1)    |
| N(2)  | 24(1)    | 23(1)    | 25(1)    | -1(1)    | 8(1)     | -5(1)    |
| N(3)  | 28(2)    | 24(1)    | 27(1)    | -2(1)    | 8(1)     | -4(1)    |
| C(1)  | 42(2)    | 31(2)    | 28(2)    | 6(2)     | 9(2)     | -7(2)    |
| C(2)  | 40(2)    | 29(2)    | 31(2)    | 1(2)     | -1(2)    | -2(2)    |
| C(3)  | 29(2)    | 31(2)    | 31(2)    | -4(2)    | 6(2)     | -5(2)    |
| C(4)  | 31(2)    | 20(2)    | 21(2)    | -4(1)    | 3(1)     | -8(1)    |
| C(5)  | 30(2)    | 28(2)    | 26(2)    | -9(1)    | 12(1)    | -8(1)    |
| C(6)  | 33(2)    | 25(2)    | 24(2)    | -8(1)    | 6(1)     | -9(1)    |
| C(7)  | 36(2)    | 35(2)    | 23(2)    | -7(2)    | 11(2)    | -12(2)   |
| C(8)  | 44(2)    | 31(2)    | 27(2)    | 3(2)     | 4(2)     | -10(2)   |
| C(9)  | 30(2)    | 27(2)    | 38(2)    | -4(2)    | 0(2)     | -2(2)    |
| C(10) | 26(2)    | 26(2)    | 22(2)    | -2(1)    | 10(1)    | -6(1)    |
| C(11) | 27(2)    | 23(2)    | 24(2)    | -9(1)    | 5(1)     | -7(1)    |
| C(12) | 29(2)    | 22(2)    | 27(2)    | -7(1)    | 7(1)     | -5(1)    |
| C(13) | 30(2)    | 30(2)    | 30(2)    | -1(2)    | 10(2)    | -7(2)    |
| C(14) | 33(2)    | 22(2)    | 20(2)    | -6(1)    | 6(1)     | -10(1)   |

|       |       |       |       |       |       |       |
|-------|-------|-------|-------|-------|-------|-------|
| C(15) | 43(2) | 27(2) | 25(2) | 1(1)  | -1(2) | -8(2) |
| C(16) | 37(2) | 25(2) | 25(2) | -4(1) | 3(2)  | -8(2) |
| C(17) | 40(2) | 32(2) | 32(2) | -3(2) | 7(2)  | -2(2) |
| C(18) | 29(2) | 27(2) | 28(2) | -7(1) | 10(2) | -4(1) |
| C(19) | 33(2) | 25(2) | 18(2) | -1(1) | 9(1)  | -3(2) |

Table S10. Hydrogen coordinates ( $\times 10^4$ ) and isotropic displacement parameters ( $\text{\AA}^2 \times 10^{-3}$ ) for 200739lt\_0m.

|       | x     | y    | z     | U(eq) |
|-------|-------|------|-------|-------|
| H(1)  | 2113  | 3425 | 5637  | 41    |
| H(5)  | 932   | 3664 | 6345  | 40    |
| H(6)  | 552   | 2995 | 8059  | 36    |
| H(7)  | 790   | 727  | 12291 | 38    |
| H(2)  | 1661  | -186 | 13159 | 41    |
| H(3)  | -1146 | 1342 | 8922  | 48    |
| H(14) | -1423 | 1548 | 10193 | 48    |
| H(15) | -1073 | 635  | 9913  | 48    |
| H(4)  | 2966  | 2556 | 6625  | 36    |
| H(11) | 2808  | -404 | 12358 | 38    |
| H(8)  | 3370  | 219  | 9626  | 52    |
| H(9)  | 3641  | -273 | 10769 | 52    |
| H(10) | 3763  | 736  | 10661 | 52    |
| H(13) | 791   | 2474 | 11667 | 34    |
| H(12) | 757   | 3000 | 10475 | 34    |
